# Supplementary material for: Information flow, cell types and stereotypy in a full olfactory connectome
Source: eLife. 2021 May 25;10:e66018. doi: 10.7554/eLife.66018 (PMC8298098; doi:10.7554/eLife.66018)
Supplement: Supplementary file 1. — bodyId refers to neurons’ unique ID in neuPrint. layer_mean contains the mean layer after 10,000 iterations of the main model (Figure 2). layer_olf_mean and layer_th_mean contain the mean layers from running the traversal model with ORNs and THN/HRNs, respectively (Figure 2—figure supplement 2). [file elife-66018-supp1.csv]

bodyId	layer_mean	layer_olf_mean	layer_th_mean
200326126	5.104	5.627	5.359
202916528	6.522	6.758	7.061
203253072	6.226	6.317	6.838
203253253	5.698	5.965	6.193
203257652	6.53	6.747	6.975
203594169	6.179	6.268	6.788
203594175	6.249	6.31	6.851
203598499	6.125	6.297	6.707
203598504	6.385	6.484	6.895
203598542	6.568	6.668	7.043
203598557	6.439	6.62	6.9
203836007	6.405	6.738	6.609
203931040	6.205	6.28	6.851
204613133	6.438	6.485	6.915
204962646	6.224	6.39	6.772
204962969	6.007	6.122	6.538
205299889	5.98	6.08	6.698
206555682	6.079	6.259	6.471
232513628	8.339	8.598	8.797
232513671	7.225	7.461	7.674
233105330	4.608	4.803	5.182
233877926	9.001	9.167	9.415
234292899	6.332	6.451	6.914
235985275	6.436	6.515	7.009
236330337	6.653	6.793	7.101
236331138	6.604	6.712	7.102
262167456	8.023	8.23	8.432
262504004	8.035	8.228	8.449
262517074	7.36	7.569	7.784
262840563	7.334	7.581	7.753
263199096	7.47	7.697	7.858
263475451	5.586	5.703	6.336
263522664	7.983	8.312	8.324
263674097	3.903	3.962	5.396
264014957	3.808	3.824	5.287
264083994	3.324	4.423	3.321
264438143	3.857	4.037	4.803
264779403	3.745	3.831	5.25
264783939	3.691	3.68	5.405
264822904	4.631	4.712	5.475
264986706	6.126	6.335	6.676
265120223	4.327	4.5	5.143
265120324	3.899	3.949	5.41
265120424	4.582	4.711	5.328
265120467	4.635	4.763	5.462
265120589	4.86	5.002	5.543
265120597	4.549	4.611	5.458
265120677	4.989	5.084	5.84
265124786	4.688	4.853	5.385
265155147	5.09	5.39	5.494
265655867	6.112	6.203	6.74
265669024	3.794	3.939	5.204
266187342	5.559	5.854	5.943
266187383	5.127	5.302	6.003
266187477	5.372	5.604	5.865
266187480	5.412	5.594	5.881
266187532	5.075	5.121	5.992
266187559	4.851	4.924	6.076
266191395	5.593	5.683	6.314
266191407	5.596	5.828	6.122
266200011	5.376	5.472	6.225
266276935	6.63	6.926	6.84
266527996	5.65	5.743	6.218
266528044	5.471	5.618	6.031
266528078	5.501	5.572	6.212
266528086	5.565	5.658	6.254
266536576	6.377	6.511	6.943
266626740	4.938	5.482	5.217
266691460	5.821	5.949	6.379
266847236	4.864	5.038	5.713
266873389	4.806	4.816	5.925
266873401	4.79	4.824	6.006
266873591	5.37	5.88	5.593
267214250	5.748	5.918	6.313
267223027	4.884	4.842	6.141
267223104	5.261	5.321	6.29
267227062	4.552	4.602	5.762
267304783	5.96	6.177	6.445
267551639	5.906	6.032	6.559
267559575	4.93	4.972	6.094
267559665	4.925	4.912	6.089
267564140	4.947	4.926	6.016
267572587	5.027	5.029	6.104
267896359	4.969	5.084	5.732
267896360	5.415	5.718	5.864
267900632	5.175	5.219	6.194
268237554	4.628	4.702	5.886
268725517	4.514	4.516	5.918
268731005	5.964	6.125	6.673
270322941	6.199	6.498	6.461
294161385	4.663	4.91	5.124
294424196	4.145	4.165	5.047
294428266	4.201	4.276	5.025
294432626	3.555	3.808	4.166
294432760	4.209	4.285	5.15
294436967	4.288	4.481	4.841
294437328	4.55	4.678	5.247
294437347	3.926	4.052	4.592
294441510	4.551	4.649	5.209
294445804	4.007	4.364	4.359
294445931	3.308	3.284	5.189
294450004	4.545	4.609	5.644
294450495	5.528	5.588	6.268
294756576	3.426	3.425	5.118
294760680	3.341	3.411	4.832
294760699	4.099	4.333	4.673
294760723	4.549	4.567	5.474
294760837	3.532	3.639	4.429
294773987	4.393	4.488	5.337
294774719	3.477	3.535	5.018
294774792	4.562	4.636	5.576
294778999	4.093	4.136	5.335
294782432	4.577	4.568	5.738
294782488	3.677	3.724	5.313
294783216	3.719	4.375	4.015
294783423	4.804	4.972	5.286
294786630	3.983	3.936	5.091
294786785	4.769	4.761	5.626
294787849	3.855	3.898	5.562
294791509	4.479	4.5	5.34
294791642	3.963	4.107	4.598
294792184	2.506	2.784	3.374
294792311	5.043	5.159	5.587
294792344	5.385	5.57	5.895
294795822	4.362	4.52	5.099
294795963	4.608	4.728	5.306
294799968	4.636	4.778	5.346
294800293	5.555	5.639	6.251
295063181	5.66	5.961	5.936
295103172	4.552	4.721	5.311
295106899	4.514	4.571	5.43
295107514	3.822	3.874	5.013
295111672	3.592	3.645	4.757
295111734	4.527	4.662	5.372
295115222	4.487	4.529	5.401
295115429	4.45	4.491	5.388
295115628	4.43	4.443	5.529
295115794	3.959	3.951	5.258
295116165	4.804	4.775	5.547
295116205	5.526	5.525	6.146
295119694	4.284	4.393	5.015
295120601	4.081	4.109	5.195
295120620	4.684	4.716	5.427
295124412	4.529	4.57	5.506
295127956	4.386	4.449	5.284
295132077	4.366	4.499	5.181
295132487	4.748	4.834	5.301
295132551	3.953	4.048	4.562
295132845	5.34	5.508	5.94
295133015	4.902	5.064	5.635
295133452	5.167	5.205	5.955
295133743	4.615	4.779	5.503
295133778	4.773	4.91	5.535
295133902	4.898	5.047	5.419
295133927	4.508	4.614	5.197
295136450	5.394	5.57	5.921
295136668	4.647	4.73	5.344
295136778	4.858	4.987	5.804
295136965	4.798	4.817	5.761
295137019	4.605	4.65	5.365
295137392	4.004	4.102	4.791
295137515	4.844	4.958	5.499
295141570	5.612	5.66	6.228
295141618	5.075	5.129	5.919
295434457	4.23	4.266	5.331
295439322	4.474	4.612	5.074
295443136	4.474	4.523	5.266
295443724	3.637	3.853	4.451
295456248	4.296	4.339	5.317
295456869	4.473	4.638	4.989
295461302	4.643	4.725	5.605
295461534	4.629	4.733	5.293
295461570	5.226	5.417	5.792
295461707	4.666	4.684	5.591
295461871	3.29	3.244	5.312
295466276	4.397	4.521	5.242
295470623	4.529	4.721	5.056
295470816	4.525	4.904	4.858
295473400	5.01	4.996	6.004
295473813	5.498	5.634	6.266
295473947	4.873	5.061	5.43
295474250	4.489	4.622	5.152
295474441	5.456	5.526	6.044
295474876	5.306	5.358	6.111
295477467	4.241	4.357	4.933
295477903	6.061	6.261	6.593
295478082	4.693	4.902	5.299
295478389	5.406	5.484	6.032
295482340	4.702	5.214	4.97
295482551	4.772	4.94	5.362
295482578	4.847	4.935	5.601
295482646	5.013	5.253	5.782
295490804	6.117	6.344	6.632
295490863	6.186	6.301	6.762
295779879	3.338	3.345	5.181
295779961	4.311	4.498	4.937
295780154	4.642	4.703	5.614
295785459	4.622	4.723	5.447
295793991	4.126	4.749	4.349
295797312	4.196	4.225	5.196
295798962	3.683	3.69	5.349
295799057	4.236	4.215	5.329
295802733	5.103	5.299	5.565
295805243	3.395	3.404	5.423
295807109	4.431	4.408	5.332
295807429	4.001	4.056	5.286
295814411	3.926	4.161	4.585
295814565	4.891	4.978	6.1
295814630	5.095	5.066	6.085
295814895	4.447	4.507	5.386
295814932	4.567	4.602	5.651
295815100	4.627	4.706	5.39
295815897	5.373	5.369	6.214
295815955	4.516	4.573	5.437
295816140	5.201	5.35	5.785
295819960	5.602	5.746	6.318
295819998	4.331	4.393	5.036
295820056	4.519	4.629	5.188
295820069	5.129	5.242	5.827
295820085	5.902	5.972	6.524
295823782	6.151	6.261	6.731
295827899	6.281	6.437	6.926
295828029	5.01	5.405	5.299
295849217	5.062	5.324	5.494
295849410	4.752	5.321	4.836
296120593	3.513	3.532	4.958
296139882	4.991	5.067	5.967
296143798	5.307	5.353	5.996
296143923	4.761	4.812	5.552
296148102	4.466	4.786	4.8
296153150	4.731	4.827	5.402
296153261	3.397	3.422	5.351
296155122	5.037	5.097	6.112
296156918	5.663	5.758	6.335
296160764	5.858	5.955	6.524
296164879	4.56	4.586	5.493
296168382	4.984	5.103	5.698
296194535	5.565	5.629	6.383
296199021	5.142	5.311	5.784
296199026	5.29	5.613	5.613
296199149	4.588	4.646	5.815
296203324	5.571	5.73	6.203
296203325	5.539	5.615	6.301
296203392	5.504	5.565	6.196
296203434	5.612	5.751	6.288
296203440	5.89	6.092	6.291
296203608	4.604	4.619	6.134
296203623	4.839	4.818	6.034
296479813	4.41	4.445	5.175
296489073	4.398	4.513	5.338
296496999	4.618	4.708	5.438
296497316	5.614	5.663	6.372
296501634	4.82	4.811	5.888
296502002	4.541	4.639	5.55
296502294	4.988	5.065	5.49
296505463	4.514	4.573	5.142
296509709	4.746	5.166	4.951
296514350	5.614	5.802	6.228
296531366	5.287	5.429	6.111
296531421	6.578	6.814	7.076
296535619	4.984	5.051	5.942
296535655	5.632	5.723	6.094
296535868	5.573	5.668	6.197
296543992	4.484	4.548	5.719
296544262	5.06	5.153	5.939
296544364	5.324	5.566	5.806
296690817	6.134	6.22	6.826
296829531	4.699	4.735	5.835
296837846	5.072	5.143	5.976
296838079	5.565	5.768	6.194
296838229	4.867	4.897	5.877
296838734	4.59	4.601	5.669
296841676	4.364	4.401	5.29
296842335	5.159	5.185	6.271
296843037	4.791	5.128	5.043
296846109	5.054	5.109	6.313
296846314	5.098	5.082	6.174
296846768	4.533	4.627	5.202
296850634	5.563	5.728	6.021
296851132	5.548	5.707	6.119
296851235	4.528	4.696	5.127
296851261	5.864	6.022	6.494
296855409	5.82	5.941	6.4
296855477	5.225	5.343	5.865
296859399	5.599	5.767	6.117
296859438	5.508	5.808	5.824
296863817	5.003	5.022	6.103
296867934	5.843	5.925	6.483
296868077	5.481	5.704	5.936
296872298	5.816	5.932	6.475
296872415	6.084	6.203	6.712
296880800	6.045	6.125	6.665
296885362	5.419	5.637	5.914
297040863	6.79	6.963	7.286
297165904	4.627	4.678	5.867
297166053	5.535	5.551	6.377
297166197	4.475	4.523	5.735
297178509	5.472	5.488	6.412
297179343	4.287	4.336	5.513
297183244	3.888	4.326	4.327
297183251	6.035	6.169	6.813
297192193	4.67	4.701	5.596
297192204	5.094	5.231	6.044
297196636	5.013	5.31	5.467
297217528	5.638	5.686	6.227
297221971	4.882	5.079	5.42
297230760	4.813	4.849	5.902
297239396	5.417	5.907	5.605
297243542	5.17	5.528	5.597
297247801	5.556	5.888	5.833
297251714	4.963	4.992	5.964
297251765	5.852	6.142	6.158
297498027	4.576	4.622	5.635
297502392	4.642	4.752	5.47
297519736	4.657	4.716	5.843
297519807	5.26	5.294	6.239
297519815	5.111	5.25	6.038
297519843	5.171	5.178	6.13
297519947	5.138	5.175	6.309
297520036	4.648	4.608	6.021
297524212	4.7	4.674	5.915
297528119	5.203	5.252	6.527
297528741	5.083	5.039	6.102
297533212	4.955	4.999	5.964
297541369	4.129	5.17	4.295
297558862	5.072	5.136	5.89
297563139	5.417	5.994	5.614
297563270	4.892	4.971	6.062
297572076	6.935	7.099	7.384
297572235	5.037	5.073	6.216
297580512	5.877	6.148	6.342
297580589	5.055	5.117	5.87
297584752	5.171	5.868	5.226
297584869	5.069	5.128	6.007
297588775	5.522	5.919	5.805
297588821	6.365	6.583	6.687
297588838	5.351	5.704	5.585
297588882	5.477	5.829	5.731
297588995	5.174	5.687	5.429
297593055	5.593	5.917	5.931
297713859	5.827	6.166	6.146
297851977	4.291	4.309	5.728
297856167	4.431	4.454	5.747
297860327	5.468	5.517	6.561
297860627	5.121	5.122	5.995
297869179	5.08	5.123	6.483
297899921	5.191	5.256	6.249
297908595	6.045	6.246	6.603
297908801	4.981	5.006	6.114
297912117	5.475	5.622	6.222
297917158	5.361	5.423	6.182
297917363	5.527	5.777	6.064
297917364	5.636	5.702	6.241
297917407	5.679	5.723	6.481
297917459	5.74	5.965	6.308
297917474	5.058	5.292	5.524
297917475	5.206	5.263	6.125
297921527	4.002	4.016	5.566
297921570	5.363	5.827	5.567
297921608	5.067	5.101	6.134
297921642	5.538	5.848	5.859
297921808	5.305	5.363	6.333
297925478	4.448	5.115	4.552
297925596	5.22	5.748	5.36
297925608	5.506	5.748	6.062
297925719	6.097	6.37	6.414
297925742	5.723	5.954	6.26
297925765	5.733	5.801	6.571
297925887	5.728	5.95	6.066
297929768	5.649	5.951	6.033
297929815	5.747	5.91	6.207
297930040	5.613	5.809	5.989
297930119	5.829	6.12	6.245
297934012	5.531	5.566	6.541
297934028	5.931	6.412	6.155
297934346	5.195	5.308	6.042
297934349	5.456	5.769	5.784
297938303	6.288	6.512	6.67
297938585	5.469	5.785	5.785
297947227	5.571	5.989	5.8
298055752	6.272	6.378	6.92
298055794	5.95	6.38	6.165
298210543	5.379	5.428	6.273
298214577	5.011	5.059	6.187
298240936	4.981	4.992	6.043
298241038	5.593	5.765	6.188
298245448	5.174	5.331	6.062
298245502	5.272	5.306	6.349
298249624	4.932	4.972	6.081
298250090	5.431	5.52	6.26
298254380	5.41	5.449	6.343
298254384	4.713	4.761	5.867
298254474	5.201	5.373	5.817
298254517	5.936	6.199	6.179
298258134	5.348	5.479	5.998
298258354	5.576	5.714	6.169
298258399	5.484	5.578	6.292
298258513	5.229	5.362	5.96
298258611	4.913	4.993	5.954
298258714	5.227	5.354	6.191
298262408	5.685	6.04	5.952
298262599	5.73	6.005	6.1
298262644	5.145	5.775	5.313
298262663	5.582	5.615	6.322
298262837	5.312	5.346	6.173
298262867	4.808	4.856	5.837
298266716	5.091	5.611	5.215
298266797	5.661	5.829	6.128
298266805	5.835	5.987	6.253
298266903	5.602	5.813	5.973
298266950	5.522	5.779	5.818
298267207	5.442	5.902	5.679
298270808	4.733	5.012	5.066
298275024	6.004	6.147	6.643
298275090	5.552	5.879	5.825
298275356	5.66	6.084	5.814
298279629	5.41	5.775	5.787
298288301	5.746	6.128	6.033
298405402	6.387	6.526	7.034
298542439	5.188	5.258	6.146
298547259	4.696	4.759	5.997
298547436	4.588	4.576	5.732
298586553	5.443	5.551	6.281
298586733	5.246	5.293	6.166
298590924	4.95	5.013	5.901
298591075	5.162	5.194	6.11
298591130	5.133	5.267	5.788
298595196	5.777	5.847	6.537
298595394	4.268	4.328	5.781
298599271	5.248	5.248	6.327
298599672	5.564	5.795	6.085
298603633	5.577	5.982	5.865
298603693	5.44	5.689	5.926
298603730	5.652	5.745	6.388
298603963	5.108	5.098	6.153
298607679	5.03	5.083	5.958
298612190	4.545	4.527	5.802
298616588	5.327	5.482	6.062
298616761	5.239	5.299	6.233
298625276	5.318	5.774	5.475
298927224	5.685	5.776	6.471
298927362	5.348	5.485	5.93
298931489	5.1	5.151	6.153
298931773	4.872	4.95	5.741
298935111	4.719	4.715	5.898
298935146	4.86	4.852	5.913
298936099	5.019	5.021	6.091
298944444	6.151	6.307	6.888
298944479	5.649	5.742	6.216
298944620	5.478	5.817	5.847
298948785	4.553	5.131	4.825
298957166	5.483	5.572	6.104
298957344	4.644	4.642	5.934
298961895	6.22	6.412	6.543
298962041	5.632	5.896	6.045
299043307	4.766	4.683	5.936
299043389	5.904	5.891	6.609
299078990	6.638	6.773	7.115
299082033	5.438	5.421	6.414
299083134	6.019	6.357	6.315
299263690	4.351	4.381	5.624
299267723	4.708	4.768	5.882
299268507	4.512	4.575	5.513
299272434	4.119	4.496	4.562
299272806	4.966	5.023	5.939
299289811	5.555	5.728	6.19
299290105	5.426	5.917	5.651
299293552	5.412	5.519	6.135
299298381	5.295	5.567	5.875
299298593	6.448	6.658	6.734
299604675	4.66	4.677	5.967
299604736	4.782	4.77	6.006
299604862	4.929	5.078	5.652
299609112	4.707	4.857	5.425
299613271	5.024	5.057	6.098
299613480	4.743	4.713	6.055
299617484	4.713	4.826	5.98
299617529	5.432	5.629	5.778
299617731	5.144	5.206	6.135
299617849	5.179	5.129	6.151
299617872	4.709	4.737	5.863
299621755	5.83	5.891	6.56
299626157	5.548	5.651	6.361
299954299	5.019	5.077	6.099
299954300	5.142	5.206	6.238
299958695	5.344	5.374	6.151
299958696	5.108	5.109	6.176
300455904	6.395	6.462	6.941
300968622	3.326	3.299	5.24
300972942	4.116	4.106	5.638
301037686	6.481	6.761	6.848
301309622	3.238	3.256	5.298
301314150	3.275	3.304	4.522
301314154	3.252	3.266	5.295
301314208	3.174	3.177	5.511
301318641	3.162	3.181	5.436
324370873	5.166	5.281	5.971
324721026	4.989	4.985	5.998
324725187	5.055	5.302	5.723
324790113	4.364	4.368	5.346
324846570	4.554	5.142	4.779
325113795	4.561	4.71	5.067
325122109	3.813	4.421	4.036
325122525	3.741	4.84	3.871
325122802	4.527	4.694	5.214
325127286	4.623	4.619	5.56
325131735	4.659	4.708	5.496
325446181	4.329	4.437	5.249
325455002	3.747	4.404	3.969
325455305	3.777	3.841	4.777
325455473	3.36	3.325	5.014
325458991	3.223	3.243	5.156
325460206	3.372	3.395	5.231
325472654	3.937	4.004	5.226
325484974	4.552	4.574	5.543
325489440	5.714	5.814	6.362
325490014	4.539	4.603	5.249
325529237	4.655	5.172	4.826
325743813	4.449	4.596	5.282
325787243	3.256	3.319	4.713
325791831	4.744	4.887	5.31
325791855	4.422	4.49	5.343
325797488	3.635	3.7	5.047
325797575	3.242	3.287	4.741
325802256	3.668	3.634	5.205
325814461	3.319	4.183	3.411
325814669	4.013	4.112	5.445
325814784	4.792	4.856	5.53
325815440	4.018	4.354	4.395
325826011	4.435	4.485	5.524
325834652	4.666	4.847	5.438
325839288	6.115	6.277	6.486
325839302	6.07	6.276	6.528
326119769	4.545	4.617	5.185
326124243	3.995	4.0	5.085
326128466	4.095	4.126	5.368
326128670	4.323	4.473	4.84
326134056	4.335	4.501	4.951
326134570	4.686	4.758	5.569
326137566	3.725	3.911	4.657
326154371	3.926	3.925	5.372
326155085	4.358	4.363	5.553
326159593	4.504	4.786	4.913
326159897	4.288	4.457	4.775
326159907	4.188	4.223	5.435
326164634	3.771	3.735	5.151
326164742	4.478	4.666	5.003
326184549	6.067	6.171	6.511
326227760	4.673	4.683	5.706
326253554	5.839	6.038	6.246
326460989	4.46	4.502	5.521
326465302	3.908	4.606	4.129
326474963	5.214	5.237	6.051
326475920	3.439	3.416	5.288
326496740	4.484	4.913	4.823
326500709	4.271	4.322	5.42
326504486	4.709	4.793	5.538
326508001	4.585	4.847	5.007
326508583	4.836	5.08	5.207
326509224	4.569	4.723	5.146
326521082	6.399	6.535	6.88
326525255	5.906	6.047	6.543
326525339	6.312	6.485	6.824
326530038	5.421	5.792	5.854
326542980	5.42	5.63	5.997
326547252	4.896	5.304	5.103
326560782	5.685	6.008	6.069
326810603	4.684	4.767	5.455
326811922	4.627	4.596	5.634
326812225	3.539	3.567	5.139
326817334	3.954	3.963	5.528
326817510	4.82	4.95	5.469
326817565	3.545	3.586	5.106
326849964	5.191	5.279	6.011
326870795	4.626	4.63	5.67
326875404	6.018	6.096	6.665
326879917	5.39	5.625	5.852
326884203	5.664	5.748	6.367
326884223	5.274	5.576	5.68
326884250	4.809	4.928	5.545
326884264	5.911	6.067	6.608
326884331	5.494	5.734	6.057
326888433	5.181	5.426	5.786
326888609	4.387	4.36	5.775
326888627	5.011	5.145	5.713
326888675	5.506	5.789	6.002
326892322	5.331	5.434	6.053
326892728	4.634	4.693	5.982
326901620	5.83	6.076	6.27
326905980	5.41	5.763	5.707
327147292	4.571	4.625	5.355
327147610	4.442	4.441	5.394
327152465	4.676	4.683	5.5
327153088	4.49	4.659	5.123
327158282	4.637	4.656	5.837
327158831	4.595	4.667	5.445
327203386	5.822	5.904	6.507
327220514	4.703	4.899	5.254
327225145	6.085	6.162	6.721
327229641	5.32	5.393	6.04
327242169	5.213	5.27	6.165
327242287	5.002	5.641	5.148
327246381	5.764	6.019	6.217
327246931	5.098	5.271	5.644
327255181	5.573	6.085	5.68
327398074	6.201	6.21	6.81
327499164	4.139	4.152	5.449
327506825	3.713	3.778	5.056
327509674	4.525	4.598	5.842
327511994	4.706	4.716	5.94
327519295	5.301	5.335	6.198
327531576	4.854	4.902	5.832
327532246	4.633	4.629	5.559
327535642	4.899	4.986	5.815
327544990	5.489	5.639	5.954
327565511	6.036	6.14	6.729
327565800	6.036	6.177	6.716
327566042	5.22	5.313	5.973
327566137	6.186	6.247	6.858
327587580	5.478	5.783	5.777
327587644	5.494	5.942	5.734
327588074	5.628	5.933	5.965
327588225	5.439	5.844	5.751
327588446	5.641	6.179	5.788
327592562	5.368	5.99	5.514
327596420	5.387	5.704	5.772
327596481	5.053	5.086	6.011
327600366	6.063	6.31	6.453
327635327	6.605	7.001	6.745
327720946	5.379	5.66	5.694
327730878	6.469	6.6	7.125
327838570	4.158	4.195	5.648
327843160	4.281	4.725	4.701
327844600	4.723	4.85	5.318
327848116	4.708	4.876	5.223
327850917	4.738	5.093	5.155
327851331	4.149	4.188	5.203
327852122	4.66	4.746	5.524
327852276	4.463	4.47	5.993
327857238	4.55	4.676	5.381
327860997	4.853	4.991	5.632
327861138	4.778	4.772	5.957
327865394	3.737	3.753	5.297
327872592	4.89	4.909	6.061
327872615	5.127	5.171	6.076
327873821	4.972	5.164	5.477
327877252	4.686	4.71	5.823
327881747	4.849	4.886	5.831
327928411	5.402	5.698	5.839
327932807	5.6	6.011	5.866
327933008	4.114	4.292	4.894
327933027	3.951	5.435	3.927
327933061	5.354	5.613	5.788
327933208	5.349	5.819	5.664
327933679	5.425	5.751	5.753
327933814	5.1	5.784	5.206
327937328	4.706	4.76	5.984
327937494	5.207	5.417	5.7
327937506	5.632	5.971	5.925
327937628	5.105	5.6	5.355
327937837	5.857	6.115	6.22
327941844	5.266	5.326	6.21
327945928	5.302	5.995	5.378
328010530	6.215	6.329	6.624
328179112	4.714	4.747	5.729
328179117	4.316	4.363	5.157
328187494	4.747	4.809	5.795
328188238	4.985	5.169	5.537
328188777	4.752	4.894	5.436
328193076	4.802	4.768	5.965
328197044	4.685	4.724	5.617
328201793	4.763	4.807	5.866
328206519	4.49	4.457	5.804
328209735	5.09	5.113	6.014
328213227	5.38	5.416	6.352
328213594	4.925	4.953	5.952
328213824	4.379	5.029	4.532
328214655	4.739	4.891	5.388
328244591	5.803	5.896	6.518
328253133	4.235	4.222	5.766
328265182	5.448	5.52	6.161
328265281	5.222	5.259	6.071
328265389	5.659	5.852	6.222
328269766	5.01	5.167	5.872
328270395	5.144	5.24	6.073
328273806	4.651	5.102	4.954
328274638	5.251	5.422	5.843
328274706	5.498	5.813	5.732
328278125	5.635	6.171	5.784
328278368	5.432	5.627	5.883
328278449	5.371	5.523	5.836
328283406	4.966	5.482	5.123
328283521	4.95	5.588	5.062
328283528	5.465	5.959	5.598
328291093	5.399	5.633	5.695
328373067	6.71	7.005	6.885
328373131	6.276	6.542	6.56
328417092	6.038	6.296	6.352
328519723	4.63	4.675	5.824
328519904	4.191	4.194	5.78
328524517	4.428	4.453	5.427
328524867	4.447	4.52	5.196
328524904	4.619	4.644	5.496
328525017	4.564	4.575	5.931
328530120	4.834	4.789	5.774
328533761	4.576	4.606	5.507
328533799	4.791	4.803	5.966
328533857	4.626	4.648	5.737
328533896	4.508	4.531	5.781
328537891	4.757	4.803	6.1
328538398	4.591	4.609	5.695
328538408	4.508	4.501	5.761
328542009	4.211	4.22	5.714
328542218	4.736	4.818	5.649
328543014	4.075	4.076	5.588
328543082	4.923	4.952	5.946
328546621	4.674	4.686	5.876
328546871	4.241	4.225	5.73
328559607	4.709	4.731	5.97
328563364	3.999	4.978	4.099
328593903	5.317	5.409	6.315
328601956	5.759	5.768	6.574
328607225	5.929	6.045	6.486
328611004	4.518	4.586	5.792
328611467	5.722	5.842	6.264
328611654	5.508	5.725	5.91
328632707	5.392	5.828	5.654
328709642	6.356	6.638	6.591
328713871	6.163	6.309	6.603
328718126	5.858	6.329	6.002
328744210	6.604	6.685	7.157
328860895	4.679	4.719	5.768
328860948	4.659	4.669	5.963
328861072	4.582	4.553	5.801
328861126	4.515	4.511	5.686
328861282	4.098	4.064	5.652
328870472	4.824	4.863	5.895
328875073	4.662	4.721	5.736
328879562	4.648	4.722	5.96
328879764	4.945	5.047	5.829
328883562	4.49	4.508	5.739
328883690	4.767	4.784	5.912
328887932	4.544	4.546	5.985
328887977	5.205	5.202	6.222
328896613	5.25	5.252	6.185
328905011	4.667	4.719	5.75
328909029	4.42	4.487	5.66
328909309	4.259	4.992	4.542
328930845	5.514	5.585	6.416
328935472	5.683	5.925	6.151
328939480	5.594	5.778	6.055
328943204	5.895	6.068	6.464
328948348	5.586	5.729	5.979
328952123	5.246	5.497	5.723
328955898	4.996	5.578	5.059
328956505	5.096	5.147	6.114
329102850	6.521	6.693	7.09
329206270	3.585	3.598	5.46
329206392	4.176	4.21	5.868
329206628	4.546	4.533	5.861
329210713	3.767	3.76	5.527
329211098	3.717	3.712	5.48
329211374	4.675	4.711	5.772
329214990	4.337	4.421	5.646
329215304	4.761	4.748	6.05
329215923	3.552	3.545	5.608
329215976	3.807	3.818	5.596
329215996	4.717	4.697	5.87
329216050	3.265	3.258	5.412
329220439	3.563	3.633	5.554
329221260	5.143	5.145	6.233
329225149	4.607	4.658	5.553
329246255	4.892	4.923	5.734
329254286	4.934	4.983	6.139
329254539	4.295	4.314	5.615
329257947	5.025	5.072	6.124
329258532	3.365	3.396	5.438
329289084	6.061	6.117	6.751
329301513	4.833	4.961	5.545
329301762	5.453	5.605	5.933
329310230	6.041	6.337	6.407
329391878	6.205	6.313	6.771
329396647	5.969	6.086	6.413
329435390	4.28	4.262	5.754
329552035	4.846	4.898	5.873
329560716	4.476	4.59	5.171
329561513	4.698	4.72	5.687
329561615	3.465	3.498	5.385
329561679	4.469	4.545	5.557
329566174	5.337	5.446	6.297
329566187	4.681	4.72	5.91
329566197	4.376	4.431	5.776
329566335	5.061	5.122	5.714
329566467	3.52	3.533	5.44
329574917	5.09	5.144	6.056
329578247	4.705	4.758	5.936
329581637	4.398	4.35	5.822
329582105	4.643	4.76	5.586
329599710	2.683	2.733	4.956
329638509	6.051	6.173	6.678
329646990	4.958	4.987	6.059
329728593	6.048	6.201	6.588
329772284	6.397	6.471	7.026
329897241	4.441	4.467	5.694
329897255	4.596	4.658	5.525
329901950	4.531	4.587	5.548
329906396	3.475	3.499	5.462
329918685	5.518	5.554	6.44
329919036	4.941	4.933	6.003
329936589	4.633	4.636	5.812
329966674	4.617	4.835	5.067
329970706	5.58	5.796	6.106
329978745	5.39	5.47	6.194
329983926	6.155	6.414	6.727
329988112	5.077	5.118	6.024
330074324	6.222	6.435	6.737
330074340	5.782	6.235	5.859
330074628	5.898	6.132	6.24
330079381	6.067	6.296	6.485
330237771	4.5	5.219	4.793
330238043	4.64	4.663	5.754
330246657	4.01	4.153	4.945
330256546	4.74	4.78	5.79
330259272	4.602	4.654	6.042
330260421	5.299	5.449	5.994
330268940	4.269	4.36	5.636
330276998	4.94	4.958	6.141
330303073	4.865	4.885	5.975
330316013	4.892	4.991	5.715
330319977	5.089	5.231	5.916
330319983	5.264	5.271	6.291
330320065	5.659	5.692	6.539
330388864	6.182	6.477	6.536
330415332	6.117	6.396	6.395
330415373	5.894	6.252	6.231
330604760	3.702	3.769	5.283
330640044	5.759	6.005	6.237
330640381	5.051	5.094	5.986
330661529	5.865	6.077	6.448
330661573	5.363	5.375	6.33
330661786	5.987	6.12	6.624
330678844	6.112	6.261	6.687
330937034	4.724	4.754	5.9
330989587	5.105	5.125	6.089
330998071	4.502	4.531	5.9
330998090	5.216	5.291	6.118
331002291	4.987	5.06	5.908
331006655	5.496	5.772	6.044
331011085	4.859	4.856	6.04
331338959	5.441	5.595	6.023
331343089	5.535	5.596	6.31
331411807	6.117	6.365	6.57
331662668	3.268	3.313	5.232
331662710	4.256	4.277	5.743
331662717	3.312	3.314	5.203
331774819	6.041	6.094	6.664
331999156	3.201	3.25	4.912
331999213	3.405	3.392	5.216
332003372	4.961	4.978	5.916
332003629	3.281	3.255	5.386
332003730	3.584	3.586	5.632
332003895	4.948	4.961	5.92
332003899	3.776	3.811	5.698
332007728	3.213	3.185	5.421
332008063	3.223	3.235	5.186
332008082	3.273	3.262	5.302
332340127	3.31	3.291	5.341
332340236	3.224	3.21	5.276
332344539	3.304	3.498	3.822
332344592	3.47	3.508	4.85
332344670	3.185	3.206	4.831
332344760	3.157	3.195	5.367
332344908	3.209	3.224	5.331
332349228	3.423	3.484	4.8
332349327	3.11	3.109	5.225
332353106	3.145	3.172	5.199
332353336	3.282	3.261	5.305
332353438	3.313	3.35	5.21
332353566	3.395	3.394	5.268
332685594	3.19	3.213	4.776
332685751	3.272	3.291	5.374
332685755	3.191	3.172	5.149
332689776	3.294	3.315	5.363
332690153	3.163	3.166	5.221
333030976	3.163	3.155	5.516
333031114	3.446	3.401	5.316
333035349	3.293	3.295	5.398
333039671	3.171	3.181	5.289
354775482	3.263	3.303	4.884
354779890	3.266	3.287	4.782
354797099	4.696	4.813	5.231
355073569	4.985	5.2	6.052
355077858	5.019	5.117	6.262
355086967	4.935	4.971	5.791
355133859	4.112	4.645	4.435
355453590	4.152	4.859	4.349
355651857	6.637	6.74	7.196
355816896	3.408	3.955	3.663
356131764	3.12	3.114	5.131
356136008	4.141	4.76	4.372
356140100	5.016	5.361	5.302
356140121	5.59	5.727	6.197
356144721	4.604	4.686	5.334
356153135	3.641	4.012	4.021
356429209	3.901	4.464	4.48
356467849	3.464	3.465	4.978
356468264	4.023	4.465	4.328
356472628	4.179	4.55	4.464
356472645	3.683	4.421	3.862
356472660	3.325	4.402	3.376
356481698	5.005	5.047	6.083
356486199	4.072	4.086	5.213
356490891	4.658	4.772	5.271
356494648	4.728	4.81	5.457
356499529	3.553	3.583	5.253
356503889	3.919	4.565	4.082
356517307	5.32	5.371	6.17
356670712	6.7	6.813	7.315
356809554	4.089	4.181	5.085
356809556	5.167	5.451	5.699
356818390	4.706	4.793	5.53
356818551	4.677	5.406	4.802
356818664	3.543	3.532	5.158
356823065	3.586	3.618	4.92
356832459	4.363	4.432	5.14
356832508	4.004	4.008	5.108
356835277	4.167	4.739	4.329
356844539	4.107	4.352	4.48
356878521	5.592	5.907	6.002
356909006	5.97	6.075	6.703
356913605	5.799	6.095	6.043
357146296	3.677	4.123	4.073
357150583	3.264	4.126	3.354
357160116	3.943	3.935	5.356
357223889	6.246	6.442	6.837
357224041	4.696	5.058	5.299
357245785	5.778	6.021	6.286
357249472	5.859	6.176	6.236
357249642	5.849	6.042	6.293
357249801	5.537	5.812	5.973
357249838	5.698	5.878	6.206
357249875	5.814	6.043	6.207
357250005	6.034	6.113	6.674
357250124	5.82	6.064	6.356
357250238	5.602	5.894	5.932
357482735	4.731	5.206	4.932
357490931	3.238	3.221	4.97
357496172	4.26	4.283	5.479
357505462	4.494	4.541	5.413
357515217	4.709	4.903	5.313
357522097	4.487	4.637	4.971
357522570	4.43	4.713	4.772
357530358	4.713	4.84	5.397
357569116	6.066	6.238	6.73
357569231	5.747	5.819	6.31
357569240	6.138	6.261	6.787
357573154	5.42	5.67	5.83
357573309	6.034	6.22	6.676
357581846	5.368	5.521	6.096
357581860	4.996	4.989	6.19
357581939	5.158	5.258	6.212
357599074	5.764	6.127	5.966
357663649	6.595	6.763	7.17
357814777	5.053	5.65	5.278
357823645	3.11	3.111	5.132
357832762	4.431	4.442	5.304
357842366	4.697	4.728	5.701
357855613	3.855	4.029	4.72
357859600	4.606	4.615	5.71
357862532	4.679	4.893	5.284
357863646	4.777	5.083	5.223
357901388	4.835	4.976	5.435
357909813	6.065	6.106	6.64
357919199	6.202	6.335	6.767
357923095	4.829	5.593	4.91
357932060	5.347	5.602	5.786
357940977	5.264	5.779	5.432
357944721	5.702	6.091	6.033
357944930	4.889	5.614	5.019
357945095	4.077	4.937	4.25
357945155	5.515	5.92	5.743
357949102	5.245	5.771	5.35
357949364	4.961	5.726	5.023
357953145	5.157	5.884	5.253
358197007	5.008	5.082	5.762
358197600	5.078	5.195	5.577
358208973	4.336	4.753	4.737
358209090	4.831	5.322	5.302
358209104	4.817	5.256	5.235
358209154	4.618	4.824	5.128
358213022	5.167	5.474	5.699
358251878	5.704	5.761	6.324
358259842	6.075	6.229	6.748
358264919	4.858	5.379	5.092
358264979	4.551	4.703	5.149
358272988	4.777	4.84	6.001
358277352	5.54	6.172	5.574
358281935	5.246	5.739	5.453
358281997	5.742	6.175	5.914
358285424	4.743	5.196	4.95
358286194	5.193	5.692	5.344
358286385	6.131	6.518	6.336
358286442	4.246	5.229	4.396
358290727	5.554	5.988	5.708
358290805	5.987	6.343	6.253
358295017	5.361	5.88	5.496
358424052	6.462	6.577	6.994
358501372	4.553	4.603	5.516
358514340	5.134	5.275	5.875
358515278	4.203	4.544	4.459
358529697	4.334	4.39	5.652
358538040	3.438	3.527	4.829
358538491	3.634	3.828	4.573
358541542	3.478	3.498	4.93
358545984	4.564	4.589	5.845
358593042	5.845	6.129	6.258
358613806	5.18	5.241	6.263
358613830	5.603	5.78	6.203
358627224	5.405	5.838	5.581
358631295	5.146	5.65	5.19
358631384	5.885	6.33	6.05
358631450	4.918	5.527	5.055
358631537	4.253	5.144	4.418
358635284	5.444	5.66	5.834
358639742	5.763	6.179	5.921
358639884	4.184	4.911	4.354
358847551	5.162	5.362	5.786
358865451	3.314	3.326	4.853
358870425	4.785	4.89	5.436
358874595	4.381	4.297	5.767
358877435	4.663	4.692	5.731
358878546	4.275	4.493	5.118
358879127	4.487	4.539	5.619
358890923	4.758	4.801	5.912
358899943	4.202	4.343	5.191
358976440	4.797	5.356	4.974
358976515	5.309	5.777	5.453
358985893	5.64	6.17	5.791
359027729	5.849	6.146	6.201
359066834	6.211	6.547	6.581
359183551	4.277	4.45	4.793
359210228	3.967	4.125	5.082
359210479	4.575	4.657	5.626
359214479	3.366	3.381	5.286
359215268	4.743	4.83	5.673
359218739	4.6	4.677	5.78
359218762	4.568	4.62	5.722
359219263	4.434	4.517	5.357
359219503	4.324	4.601	4.943
359219722	4.958	5.0	6.087
359223830	3.735	3.712	5.453
359227113	4.745	4.729	5.966
359240144	4.691	4.739	5.959
359240396	5.325	5.392	6.197
359279388	4.031	4.023	5.417
359287673	5.24	5.442	5.915
359292188	5.897	6.053	6.486
359317340	5.445	5.675	5.92
359317640	6.171	6.512	6.394
359326692	5.417	5.991	5.691
359326764	5.289	5.858	5.405
359524536	3.433	3.461	4.631
359529027	4.301	4.425	5.064
359555152	4.595	4.609	5.747
359555628	3.549	3.527	5.363
359555689	3.692	3.707	5.46
359556017	4.423	4.411	5.731
359560118	3.714	3.74	5.393
359560701	4.597	4.647	5.882
359560762	3.421	3.429	5.182
359564703	4.752	4.759	5.882
359568205	4.033	4.019	5.651
359568460	4.117	4.118	5.664
359581549	3.727	3.771	5.677
359586213	5.094	5.111	6.195
359594119	5.03	4.998	6.101
359598627	4.235	4.258	5.776
359628017	5.053	5.061	6.183
359637824	5.079	5.125	6.085
359744514	6.344	6.584	6.649
359749513	5.953	6.181	6.461
359891881	3.413	3.444	5.298
359892436	3.224	3.165	5.412
359892669	4.369	4.399	5.447
359897288	4.23	4.26	5.628
359897526	4.577	4.622	5.602
359900300	4.507	4.452	5.74
359901157	4.296	4.319	5.588
359905678	4.002	3.989	5.53
359913281	4.129	4.209	5.328
359913782	3.365	3.415	5.003
359917896	4.601	4.641	5.896
359918228	4.84	4.884	5.811
359926718	4.937	4.968	5.999
359926731	4.848	4.948	6.053
359926787	4.963	5.15	5.987
359926923	4.716	4.74	5.737
359931311	5.008	5.025	5.936
359944162	4.76	4.785	6.037
359974171	5.021	5.024	6.239
360086302	6.156	6.53	6.394
360236724	4.424	4.455	5.735
360236750	3.137	3.142	5.436
360237353	3.74	3.748	5.62
360237650	4.406	4.422	5.734
360238069	3.925	3.936	5.367
360242173	4.461	4.465	5.757
360245971	4.595	4.6	5.897
360246734	3.74	3.738	5.364
360246848	4.722	4.808	5.518
360254108	5.3	5.39	6.036
360254511	4.502	4.531	5.812
360254994	3.769	3.733	5.375
360255138	4.093	4.16	5.591
360259013	4.512	4.576	5.61
360259229	3.91	3.87	5.422
360263797	5.21	5.336	6.069
360268385	4.903	5.012	5.588
360284300	4.18	4.28	5.215
360310976	5.492	5.626	6.136
360314997	3.43	3.45	5.699
360315461	5.106	5.095	6.039
360319284	4.984	5.024	5.986
360319323	4.994	5.051	5.99
360349882	5.145	5.243	6.164
360427510	5.549	6.003	5.741
360466268	6.529	6.606	7.042
360573708	4.212	4.213	5.584
360578457	3.782	3.797	5.565
360578625	3.37	3.344	5.353
360578907	3.387	3.412	5.445
360583021	3.483	3.584	4.71
360587642	4.529	4.534	5.646
360591860	4.782	4.811	5.721
360595711	3.316	3.36	5.389
360596183	3.578	3.644	4.936
360660371	4.817	4.878	5.999
360673271	5.875	6.007	6.498
360677632	5.717	6.075	5.987
360690414	5.254	5.803	5.453
360698817	5.099	5.185	6.066
360759031	5.302	5.348	6.335
360764170	5.986	6.087	6.654
360773196	6.164	6.283	6.817
360914546	4.481	4.57	5.572
360914617	4.242	4.259	5.673
360927799	3.426	3.388	4.996
360928792	3.616	3.629	5.498
360932188	3.827	3.845	5.625
360941147	5.341	5.434	6.277
360950551	3.646	3.771	4.986
360954739	4.396	4.454	5.367
360958913	4.807	4.831	5.899
361005850	5.771	5.906	6.445
361040812	6.151	6.233	6.715
361104490	6.107	6.447	6.458
361105354	6.159	6.297	6.769
361108721	5.551	5.549	6.426
361259770	3.775	3.817	5.327
361260110	4.197	4.243	5.658
361264970	4.317	4.341	5.533
361269751	3.55	3.535	5.252
361269864	3.892	3.844	5.622
361273559	4.224	4.302	5.686
361298637	5.471	5.493	6.393
361312146	5.673	5.806	6.282
361312808	4.752	4.797	5.721
361341837	5.233	5.284	6.244
361351171	5.391	5.447	6.525
361355033	5.167	5.373	5.967
361364000	6.155	6.367	6.657
361376643	5.656	5.749	6.456
361445621	5.829	5.866	6.513
361451032	6.165	6.306	6.658
361614914	4.028	4.244	5.026
361636071	5.542	5.606	6.501
361640697	4.758	4.802	5.981
361700223	5.443	5.576	6.32
361700674	5.108	5.176	6.116
361704572	5.825	5.942	6.566
361722354	5.612	5.741	6.133
361955066	4.618	4.634	5.73
361955275	3.948	3.927	5.35
361959852	3.699	3.762	5.174
361964228	4.48	4.521	5.697
361964245	4.516	4.597	5.468
361968122	3.766	3.809	5.019
361981338	4.917	4.982	6.071
362007054	4.615	4.642	5.972
362019898	5.365	5.455	6.343
362020664	4.842	4.85	5.955
362024428	4.53	4.528	5.978
362041442	4.574	4.588	5.87
362045855	5.81	5.922	6.552
362299997	5.221	5.337	5.837
362369976	5.248	5.288	6.346
362394990	4.096	4.84	4.235
362395402	5.638	5.67	6.442
362473525	5.739	6.031	6.12
362507326	6.614	6.798	7.17
362689128	3.24	3.252	5.325
362693077	3.237	3.212	5.35
362693473	3.35	3.368	5.268
362697657	3.291	3.298	5.247
362701764	3.348	3.392	5.313
362701875	3.197	3.186	5.132
362701895	3.367	3.389	5.321
362701969	3.41	3.497	5.015
362715189	6.175	6.327	6.935
362719326	5.245	5.681	5.609
362814519	5.923	6.217	6.315
362862047	6.14	6.252	6.804
362866879	5.472	5.522	6.288
363029976	3.308	3.295	5.386
363030024	3.196	3.167	5.312
363030040	3.336	3.399	4.431
363034174	3.278	3.259	5.338
363034211	3.24	3.256	5.306
363034407	3.312	3.292	4.915
363034501	3.178	3.175	5.312
363038752	3.333	3.319	4.919
363038831	3.279	3.28	5.131
363042781	3.257	3.236	5.164
363047222	3.187	3.214	5.214
363370708	3.2	3.221	5.413
363370913	3.322	3.305	5.453
363371001	3.169	3.178	5.475
363375247	3.459	3.504	5.008
363375408	3.162	3.16	5.221
363375475	3.478	3.435	5.272
363379387	4.97	4.979	5.919
363384083	3.238	3.274	5.331
363384090	3.149	3.132	5.149
363384138	3.195	3.187	4.86
363387921	3.256	3.214	5.406
363716151	3.104	3.108	5.468
363716303	3.444	3.684	4.181
363716362	3.118	3.137	4.983
363724985	3.213	3.205	5.115
363724996	3.217	3.203	5.236
363725096	4.992	4.996	5.918
363725201	3.215	3.192	5.316
363725228	3.317	3.362	5.267
363729312	3.389	3.338	5.408
363729314	3.275	3.262	5.331
363733406	3.317	3.313	5.229
364061776	3.244	3.23	5.343
364066029	4.953	4.972	5.973
364070309	3.433	3.437	5.497
364070517	3.253	3.263	5.364
364156501	5.82	5.944	6.337
364217037	5.03	5.034	6.231
364407023	3.346	3.314	5.3
364411143	3.315	3.284	5.364
385132611	3.222	3.226	5.162
385158577	3.293	3.33	4.668
386191185	4.455	4.523	5.755
386280932	6.681	6.708	7.377
386506469	4.591	4.921	4.907
386821054	3.456	3.453	5.199
386821081	3.077	3.056	5.182
386825553	3.743	3.76	5.037
386825636	3.28	3.317	4.957
386825720	3.206	3.185	4.967
386825792	3.168	3.178	5.058
386829647	5.122	5.274	5.767
386833812	3.354	3.776	3.775
386833850	4.514	5.16	4.607
386834269	4.623	5.138	4.834
386838513	3.576	3.63	5.051
386838814	3.581	3.734	4.395
386842280	4.653	4.906	5.225
386847799	4.043	4.723	4.296
386877197	5.578	5.923	5.872
387023620	7.869	8.051	8.301
387166379	4.691	5.41	4.871
387170738	3.57	4.26	3.704
387180418	5.148	5.223	5.803
387180498	3.602	4.049	3.841
387215056	3.512	4.3	3.668
387227028	5.958	6.277	6.214
387364605	7.738	7.934	8.207
387503511	3.476	4.495	3.618
387507495	3.966	4.544	4.146
387512128	5.64	5.833	6.242
387516191	4.354	4.622	4.993
387538632	3.861	3.955	5.035
387556524	4.469	4.545	5.128
387568523	4.259	4.402	5.167
387809633	4.605	4.652	5.726
387870860	3.529	3.765	4.124
387878711	4.739	4.831	5.619
387913101	6.417	6.607	6.938
387913933	6.513	6.662	6.966
387939094	5.465	5.769	5.811
387939267	5.518	5.818	5.839
387943673	5.353	5.631	5.689
387944118	4.691	5.211	4.888
387952104	4.44	5.243	4.53
388012215	6.169	6.263	6.78
388208592	4.586	5.131	4.972
388211850	4.692	4.844	5.445
388246273	5.167	5.23	6.027
388267095	5.029	5.122	5.796
388280029	5.802	6.194	6.18
388280137	5.345	5.535	5.96
388280200	5.349	5.586	5.721
388280249	5.672	5.913	6.098
388280268	5.494	5.922	5.742
388280286	5.479	5.794	5.873
388280297	5.767	6.01	6.18
388280322	4.736	4.747	5.948
388280333	5.397	5.633	5.903
388280381	5.741	5.985	6.205
388280529	5.793	6.109	6.149
388280541	5.925	6.201	6.399
388280610	5.139	5.724	5.415
388284324	4.961	4.977	6.092
388289013	5.39	6.119	5.471
388293131	5.134	5.501	5.478
388513242	4.425	4.532	5.047
388513464	3.334	3.328	5.495
388553520	4.616	4.778	5.349
388565572	4.757	5.075	5.308
388605118	4.799	5.008	5.446
388608485	6.037	6.12	6.764
388612388	6.287	6.476	6.863
388629465	4.158	4.929	4.371
388638672	5.434	5.933	5.633
388854495	3.652	3.677	5.122
388859011	4.452	4.549	5.24
388863775	3.73	3.705	5.325
388877336	4.964	5.032	5.622
388881226	3.888	4.868	3.932
388885518	4.537	4.76	5.307
388898076	3.721	3.877	4.649
388898102	4.646	4.722	5.658
388898107	4.671	4.847	5.485
388898135	4.728	4.905	5.589
388898152	4.644	4.626	5.716
388898153	4.584	4.755	5.439
388898174	4.492	4.559	5.592
388898182	4.19	4.209	5.587
388902666	4.629	4.664	5.799
388902705	4.571	4.577	5.753
388902751	4.55	4.659	5.496
388924424	4.078	4.184	4.896
388954086	5.377	5.738	5.852
388975834	5.736	6.147	6.007
388984132	4.424	5.094	4.644
389195896	4.131	5.07	4.16
389199391	5.698	5.916	6.126
389199936	4.503	5.033	4.908
389200241	4.757	4.948	5.164
389204888	4.458	4.512	5.387
389204929	5.183	5.283	5.913
389205204	4.178	4.495	4.732
389210230	5.001	5.218	5.57
389217959	5.13	5.25	5.935
389239243	4.634	4.707	5.624
389247395	4.89	4.963	6.035
389303772	4.797	4.856	5.961
389307767	5.138	5.182	6.225
389311717	5.441	5.717	5.861
389316722	5.771	6.245	5.915
389316762	5.205	5.319	6.042
389325067	4.788	5.341	4.972
389527383	4.405	4.877	4.522
389536816	4.443	4.566	5.143
389536926	5.267	5.456	5.654
389541075	5.845	5.98	6.231
389545760	5.255	5.402	5.838
389546522	4.804	4.924	5.6
389559112	5.127	5.206	5.639
389563849	4.819	4.943	5.749
389568268	4.49	4.602	5.507
389575937	4.647	4.679	5.877
389589423	3.923	4.857	4.046
389626867	4.088	4.6	4.514
389657555	4.95	5.558	5.104
389661909	5.364	5.459	6.04
389687699	4.943	5.248	5.102
389909109	4.259	4.637	4.781
389917104	3.97	4.101	5.049
389920846	4.417	4.722	4.999
389929872	4.772	4.842	5.811
389934175	4.761	4.805	5.674
389951232	3.808	3.803	5.69
389972823	5.51	5.719	5.954
389976940	5.116	5.472	5.478
390003153	5.056	5.082	6.094
390015588	5.992	6.207	6.292
390024952	5.605	6.001	5.745
390097182	5.95	6.14	6.445
390223560	3.458	3.479	5.213
390245740	3.665	3.681	5.426
390254536	3.589	3.626	5.541
390258187	4.646	4.67	5.789
390271033	4.299	4.302	5.666
390271275	4.033	4.322	4.512
390275105	4.535	4.587	5.714
390279522	4.595	4.723	5.277
390279635	4.714	4.994	5.249
390280026	4.865	4.94	5.918
390330983	5.423	5.787	5.784
390331214	5.948	6.141	6.296
390331583	5.607	6.145	5.81
390344260	5.728	5.986	6.233
390344371	4.261	4.881	4.526
390352384	5.522	5.609	6.279
390356988	5.524	5.967	5.835
390361224	5.225	5.502	5.702
390378650	5.359	5.877	5.556
390447010	5.787	6.141	6.081
390473497	5.772	6.216	5.988
390486371	6.354	6.477	6.864
390560212	3.568	3.564	5.005
390564245	4.67	4.718	5.732
390579059	4.514	4.564	5.71
390586752	3.948	3.962	5.661
390586997	3.638	3.842	4.503
390589591	4.382	4.416	5.804
390590450	4.508	4.896	4.808
390590590	4.509	4.525	5.887
390593931	4.535	4.547	5.732
390594712	4.262	4.299	5.596
390598284	4.402	4.419	5.802
390599010	4.683	4.765	5.74
390599254	3.641	3.676	5.182
390603428	3.204	3.176	5.158
390607680	4.837	4.907	5.531
390612328	4.661	4.668	5.746
390616420	5.523	5.609	6.399
390616496	4.843	4.901	5.888
390628719	4.557	4.55	5.758
390629106	4.711	4.711	5.863
390641835	4.703	4.702	5.74
390667603	5.638	5.742	6.352
390697959	6.066	6.337	6.328
390702220	5.809	6.145	6.09
390706983	5.491	5.988	5.593
390818643	5.834	5.986	6.23
390909624	4.113	4.382	4.791
390910102	4.707	4.929	5.172
390918452	4.586	4.72	5.572
390919468	4.52	4.582	5.534
390919685	4.115	4.105	5.756
390931864	3.582	3.613	5.363
390935343	3.494	3.491	5.314
390935535	3.556	3.572	5.349
390947722	4.951	4.995	5.88
390948259	3.559	3.527	5.174
390948580	3.68	3.72	5.115
390948675	4.622	4.618	5.788
390952738	3.339	3.411	4.426
390953189	3.451	3.559	4.341
390961490	4.48	4.55	5.661
390969969	4.66	4.722	5.86
391016873	5.462	5.739	5.921
391021712	5.075	5.087	5.924
391026123	4.512	5.067	4.747
391034580	5.605	5.993	5.846
391052159	5.352	5.878	5.528
391121098	6.093	6.341	6.59
391124880	6.272	6.578	6.492
391155063	6.249	6.405	6.77
391155165	6.551	6.702	6.99
391273276	3.694	3.707	5.298
391276906	3.282	3.325	5.225
391289383	4.652	4.705	5.722
391289810	4.645	4.652	5.916
391297978	4.878	4.9	5.747
391310849	4.522	4.584	5.335
391311186	4.821	4.926	5.803
391328156	4.061	4.1	5.475
391362634	4.942	5.311	5.143
391496898	5.49	5.554	6.398
391599963	4.421	4.493	5.701
391600399	5.197	5.333	5.924
391604389	4.673	4.676	5.763
391604407	3.532	3.52	5.39
391608263	4.441	4.443	5.617
391609333	3.665	3.629	5.417
391610069	5.316	5.478	5.861
391617921	4.548	4.545	5.735
391618398	4.82	4.876	5.881
391625677	4.224	4.227	5.771
391630222	4.851	4.883	5.944
391631218	3.429	3.515	4.528
391643292	4.534	4.613	5.897
391652073	4.593	4.634	5.6
391716661	3.52	3.506	5.706
391799282	5.974	6.336	6.334
391945237	3.607	3.603	5.405
391949576	4.543	4.525	5.664
391954490	4.346	4.343	5.838
391954889	4.251	4.265	5.631
391958263	4.5	4.516	5.646
391958379	3.926	3.92	5.522
391963473	4.414	4.443	5.715
391971839	4.945	5.026	5.879
391971977	4.672	4.684	6.011
391976125	4.815	4.909	5.661
392002352	3.704	4.368	4.059
392057736	5.88	6.125	6.305
392130578	6.007	6.086	6.586
392285973	4.632	4.659	5.914
392299403	3.874	4.197	4.774
392304239	5.075	5.182	5.932
392307898	3.725	3.713	5.445
392308518	3.857	3.828	5.394
392325540	4.327	4.567	4.842
392325925	5.565	5.666	6.431
392368893	4.249	4.386	5.307
392389970	5.953	6.179	6.53
392399005	5.921	6.069	6.495
392411222	5.492	5.941	5.806
392424485	6.144	6.213	6.679
392445880	5.912	6.191	6.296
392636270	4.294	4.458	4.917
392640591	3.643	3.677	5.351
392645419	4.601	4.583	5.846
392645639	3.464	3.452	5.162
392735903	5.245	5.364	5.746
392748193	6.06	6.224	6.432
392757094	6.121	6.272	6.695
392821837	6.179	6.455	6.553
392985492	3.515	3.529	4.751
393003572	4.223	4.328	5.107
393051378	5.283	5.255	6.264
393055504	4.768	4.812	5.849
393063351	5.96	6.129	6.367
393171256	6.203	6.378	6.768
393210919	6.063	6.121	6.783
393215048	6.302	6.434	7.133
393215059	5.866	6.127	6.215
393340402	4.607	4.63	5.857
393383025	3.227	3.219	5.282
393387426	3.259	3.274	5.36
393404592	4.565	4.636	5.934
393736822	3.201	3.171	5.36
393766777	4.316	4.321	5.7
393776005	5.605	5.824	6.139
393883499	6.072	6.13	6.703
393888286	6.277	6.38	7.076
394060556	3.25	3.22	5.107
394060620	3.247	3.237	5.24
394064790	3.311	3.265	5.234
394069210	3.197	3.194	5.225
394073547	3.367	3.367	5.375
394077610	3.294	3.307	5.295
394081878	3.314	3.325	5.368
394095053	5.811	5.971	6.526
394225044	5.023	5.026	6.247
394397189	3.202	3.19	5.409
394401778	3.154	3.154	5.299
394414724	3.361	3.362	5.308
394414783	3.875	3.922	5.383
394418743	3.216	3.211	5.213
394427392	3.234	3.243	5.05
394755376	3.382	3.369	5.154
394755632	3.653	3.657	5.572
394755645	3.179	3.184	5.369
394755742	3.494	3.435	5.387
394755782	3.167	3.153	5.231
394759626	3.2	3.198	5.238
394759837	3.197	3.172	5.228
394764082	3.249	3.262	5.239
394768379	3.258	3.239	5.152
395105113	3.285	3.279	5.27
415494049	3.183	3.237	4.858
415511327	3.229	3.237	5.236
415835070	3.256	3.299	5.15
415835178	3.204	3.253	4.965
415848195	3.151	3.163	5.223
415848228	3.204	3.206	4.969
415852518	3.194	3.179	5.132
415908516	3.165	3.173	5.309
416189410	3.222	3.213	5.11
416189500	3.224	3.23	5.183
416508862	3.197	3.182	5.114
416642425	7.723	7.981	8.205
416837168	3.172	3.199	5.187
416876055	5.181	5.271	6.05
417143726	5.181	5.788	5.317
417186612	3.082	3.1	4.39
417186656	3.563	3.573	4.968
417190793	3.418	4.867	3.397
417199910	2.105	4.772	2.115
417204164	3.475	4.408	3.573
417204354	3.369	3.538	3.918
417221397	5.383	5.604	6.052
417536905	4.525	5.182	4.666
417540543	3.455	4.464	3.581
417550216	4.158	5.317	4.265
417554241	3.372	3.512	4.28
417558532	3.879	5.144	3.901
417834021	4.444	4.543	5.152
417869138	3.574	3.76	4.19
417882515	3.973	4.675	4.126
417890128	3.343	4.225	3.42
417908800	5.424	5.843	5.684
417998204	7.428	7.569	8.034
418175238	5.435	5.534	6.198
418205694	3.851	4.204	4.193
418214549	4.848	4.867	5.584
418224106	4.102	4.357	4.475
418224293	3.658	4.124	3.948
418224351	4.039	4.248	4.558
418261858	4.124	5.381	4.188
418503161	4.896	5.125	5.562
418511983	4.79	4.857	5.851
418516266	3.855	3.907	5.515
418516470	5.479	5.696	5.941
418552044	4.085	4.354	4.704
418556051	4.864	5.061	5.617
418585726	4.801	4.881	5.477
418607079	5.946	6.085	6.648
418607328	5.146	5.33	5.572
418607477	5.889	6.194	6.215
418611695	5.86	6.181	6.13
418641700	5.241	5.783	5.396
418645869	5.76	6.138	5.938
418861761	4.155	4.209	5.286
418865948	3.583	3.586	5.092
418870503	4.154	4.553	4.621
418875451	3.921	3.934	5.276
418888180	3.912	4.957	3.951
418888248	4.754	4.883	5.221
418888552	3.85	4.277	4.172
418892691	3.88	4.238	4.187
418897332	4.563	4.816	5.078
418922937	4.464	5.136	4.743
418969927	5.683	5.93	6.024
418969956	5.078	5.567	5.357
418970095	5.524	5.891	5.869
418970102	5.466	5.705	6.007
418970112	5.994	6.17	6.398
418970123	5.22	5.476	5.691
418970128	5.455	5.763	5.857
418970154	5.935	6.139	6.375
418970196	5.792	6.093	6.178
418987009	5.424	5.871	5.694
419060083	6.773	6.937	7.404
419207462	4.265	4.259	5.599
419216386	4.041	4.167	4.801
419230063	4.522	4.658	5.125
419234116	3.586	3.598	5.344
419337157	5.367	5.628	5.829
419345606	5.502	5.816	5.791
419543946	3.738	3.695	5.457
419548541	3.361	3.372	5.07
419548748	3.216	3.225	5.45
419557747	3.729	3.775	5.058
419575044	4.708	4.867	5.463
419578845	3.563	3.559	5.498
419588136	4.494	4.532	5.835
419596232	4.627	4.707	5.704
419596540	4.591	4.646	5.787
419639581	6.197	6.389	6.802
419639583	6.586	6.805	7.129
419665356	5.77	6.252	5.946
419669180	5.486	6.002	5.687
419669547	5.536	6.022	5.767
419802644	5.629	5.928	6.093
419803353	5.722	5.925	6.307
419807685	5.817	6.01	6.256
419880359	3.713	3.694	5.414
419880385	3.067	3.062	5.42
419880519	3.943	3.933	5.063
419884905	3.43	3.464	4.756
419884922	3.521	3.47	5.47
419884971	3.664	3.688	5.485
419885042	4.142	4.204	5.474
419889682	3.703	3.695	5.499
419889751	3.57	3.582	5.115
419907780	6.039	6.238	6.606
419908058	5.408	5.59	5.831
419919816	4.602	4.685	5.554
419929377	3.599	3.581	5.369
419980081	4.648	4.944	5.006
420010739	5.455	5.723	5.969
420027427	4.623	5.479	4.721
420221276	4.226	4.546	4.544
420226410	3.759	3.719	5.595
420230547	3.852	3.836	5.261
420235118	3.735	3.677	5.483
420235167	4.41	4.511	5.514
420239937	4.802	4.943	5.54
420252614	4.574	4.573	5.777
420274150	4.133	4.234	5.078
420325753	5.671	5.993	5.994
420347328	4.32	4.942	4.429
420347360	5.198	5.358	5.928
420351087	5.298	5.966	5.408
420351828	5.864	6.25	6.182
420382647	5.722	6.257	5.876
420386244	5.562	6.225	5.689
420567894	4.876	4.976	5.464
420571563	4.631	4.99	4.96
420572095	4.05	4.676	4.293
420581268	5.166	5.296	5.675
420586101	5.422	5.771	5.819
420594200	3.785	3.729	5.383
420598392	4.435	4.699	5.083
420614725	4.519	4.543	5.693
420615275	3.654	3.678	5.215
420623873	4.791	4.849	5.753
420627152	4.264	4.502	4.757
420666689	5.369	5.652	5.938
420671166	5.003	5.39	5.148
420688241	5.835	6.114	6.162
420688294	5.848	6.065	6.325
420696828	4.988	5.314	5.392
420723066	5.593	5.932	5.924
420799910	5.822	6.118	6.055
420842989	6.313	6.419	6.938
420904348	4.18	4.285	4.82
420908078	5.223	5.358	5.917
420952125	4.498	4.489	5.788
420956213	3.766	3.771	5.456
420956527	4.114	4.162	5.496
420965117	5.125	5.229	6.014
420973599	4.783	4.818	5.971
420973612	5.483	5.584	6.467
420977956	4.177	4.257	5.73
421003580	4.589	4.674	5.429
421033734	5.336	5.61	5.854
421041565	5.624	5.852	6.138
421054850	5.349	5.894	5.507
421055181	5.228	5.859	5.34
421068062	5.55	6.106	5.701
421137107	5.866	6.459	6.056
421184151	5.538	5.603	6.312
421271305	4.493	4.538	5.778
421292214	3.642	3.726	5.043
421297236	4.69	4.709	5.773
421297485	4.646	4.794	5.384
421300612	4.355	4.552	4.949
421305688	4.922	4.924	5.635
421305971	4.926	4.99	5.804
421310144	3.698	3.7	5.31
421313563	4.835	4.904	5.926
421318463	4.75	4.817	5.79
421318649	4.835	4.918	5.718
421357275	6.195	6.312	6.903
421405157	5.29	5.991	5.481
421605182	4.801	4.882	5.807
421620469	3.716	3.735	5.373
421633905	3.787	3.772	5.485
421638281	3.615	3.586	5.336
421641859	3.773	3.773	5.353
421642652	4.541	4.597	5.808
421642764	4.461	4.488	5.562
421646999	3.706	3.755	4.917
421650982	5.031	5.25	5.608
421650988	4.549	4.609	5.499
421650994	4.521	4.605	5.454
421654726	4.773	4.824	5.756
421655012	4.741	4.782	5.816
421668365	4.129	4.34	4.968
421698065	5.538	5.592	6.4
421728488	5.326	5.441	6.051
421732477	5.355	5.449	6.153
421946059	5.021	5.151	6.068
421957539	4.14	4.196	5.676
421957711	3.819	3.825	5.472
421975193	4.718	4.746	5.962
421983723	3.502	3.495	5.259
421992055	4.735	4.784	5.741
421992069	3.837	3.842	5.335
422000744	4.7	4.797	5.422
422052346	5.339	5.821	5.518
422056477	5.717	6.048	6.115
422056521	5.601	6.084	5.826
422155460	6.065	6.295	6.526
422191200	6.911	6.967	7.506
422277426	5.462	5.86	5.758
422307542	3.403	3.363	5.351
422311625	3.539	3.519	5.343
422312019	3.963	3.947	5.61
422312023	3.86	3.854	5.489
422312162	3.58	3.541	5.43
422337400	5.185	5.282	5.904
422388958	4.711	4.744	5.969
422401750	4.883	5.011	5.471
422419397	5.544	5.912	5.87
422496879	6.381	6.789	6.626
422622063	4.877	4.905	5.888
422635203	4.088	4.134	5.534
422640861	3.514	3.539	5.156
422644053	3.329	3.323	5.198
422656780	3.241	3.266	5.364
422666053	3.732	3.746	5.459
422669150	4.226	4.278	5.322
422674339	4.384	4.425	5.52
422682603	4.282	4.285	5.603
422725634	4.167	4.186	5.682
422738252	5.923	6.035	6.545
422742649	6.104	6.315	6.683
422751191	4.736	4.812	5.829
422755871	5.718	5.742	6.511
422837964	5.753	6.257	5.881
422876942	6.367	6.45	7.086
422877762	6.725	6.843	7.34
422881784	6.136	6.232	6.804
422971316	3.506	3.488	5.473
422997837	4.342	4.338	5.519
423096449	5.645	5.782	6.377
423096943	5.366	5.386	6.344
423101189	5.852	6.097	6.394
423105632	5.106	5.35	5.664
423174813	6.255	6.365	6.86
423330124	3.549	3.559	5.354
423343583	3.463	3.491	5.226
423351806	4.019	4.088	5.648
423364866	4.97	4.925	5.994
423382015	4.136	4.148	5.66
423416887	4.316	4.456	5.619
423442357	5.626	5.866	6.055
423512063	6.068	6.19	6.53
423516229	6.188	6.444	6.644
423563311	6.233	6.336	6.91
423671124	4.48	4.49	5.6
423684795	3.642	3.626	5.305
423748579	4.361	4.399	5.659
423749262	5.248	5.292	6.294
423757555	4.961	4.977	6.101
423766084	5.486	5.765	5.788
423770604	5.813	5.883	6.682
423774471	4.417	4.379	5.894
423792217	6.095	6.151	6.648
423792440	5.796	5.916	6.397
423852404	6.05	6.192	6.522
423852469	5.981	6.017	6.611
424025668	3.481	3.524	5.182
424037884	5.656	5.671	6.483
424089598	3.871	3.962	5.412
424137975	6.197	6.614	6.348
424193116	6.03	6.218	6.752
424193190	6.18	6.316	6.652
424236821	6.587	6.714	7.222
424250610	6.347	6.492	6.863
424366776	4.147	4.17	5.515
424379864	4.687	4.676	5.913
424384254	3.382	3.349	5.431
424388492	5.23	5.319	5.92
424434994	5.231	5.286	6.326
424443911	4.499	4.555	5.743
424452682	5.777	5.893	6.576
424577375	6.403	6.479	7.05
424582092	5.433	5.478	6.379
424706955	3.856	3.809	5.253
424716408	3.603	3.579	5.298
424720670	4.275	4.289	5.695
424729369	4.415	4.501	5.686
424729434	4.673	4.779	5.457
424733177	4.031	4.072	5.409
424754530	3.318	3.393	4.842
424767514	4.107	4.14	5.423
424776680	3.765	3.833	5.851
424780893	3.227	3.295	4.206
424781115	3.404	3.435	5.571
424789697	4.161	4.138	5.672
424792976	5.908	6.075	6.55
424793122	5.607	5.661	6.478
424918786	5.759	5.791	6.574
425060903	4.587	4.578	5.718
425086839	4.802	4.808	5.731
425086851	5.011	5.036	6.036
425104113	3.3	3.288	5.312
425104178	5.2	5.196	6.231
425104216	3.191	3.206	5.338
425112506	3.239	3.265	5.361
425121937	5.508	5.649	5.946
425121959	3.304	3.318	4.783
425126008	4.689	4.754	5.817
425143700	5.694	5.858	6.293
425148091	5.57	5.81	6.16
425276848	4.495	4.539	5.665
425431837	3.238	3.227	5.369
425436170	3.299	3.296	5.401
425445301	3.184	3.209	5.288
425462513	5.137	5.249	6.033
425471220	3.658	3.705	5.177
425768768	3.219	3.221	5.312
425768822	3.36	3.391	5.031
425790257	4.067	4.097	5.408
425803370	3.34	3.31	5.01
426139965	3.23	3.223	5.251
426464004	3.288	3.352	4.504
426477089	3.358	3.316	5.362
426818061	4.811	4.87	5.93
446533552	3.254	3.29	4.856
446714544	7.247	7.399	7.776
446826981	3.25	3.254	5.2
446848967	3.241	3.258	5.138
446883390	3.234	3.264	4.852
447219992	3.226	3.279	4.657
447224575	3.2	3.2	5.255
447228814	7.549	7.631	8.207
447599745	4.192	4.693	4.597
447872055	5.901	6.001	6.505
448204394	4.994	5.122	5.946
448225646	3.143	3.127	5.195
448234999	4.277	5.183	4.448
448238871	4.519	5.411	4.597
448260940	4.939	5.207	5.26
448342846	5.567	5.701	6.172
448515267	5.271	5.941	5.467
448536695	5.291	5.368	5.971
448576577	5.122	5.429	5.927
448869118	3.611	3.739	4.893
448899493	4.704	4.887	5.599
448908723	4.8	5.099	5.193
448908822	4.744	4.938	5.26
448912981	5.101	5.254	5.734
448942604	4.68	5.371	4.824
448994377	4.667	4.941	5.193
449205588	4.57	4.648	5.544
449205611	4.518	4.781	5.206
449209892	4.596	4.655	5.679
449209971	5.034	5.101	5.925
449218986	5.689	5.848	6.06
449223263	3.992	4.029	5.556
449223347	3.479	3.453	5.472
449223379	3.904	3.941	5.421
449227486	3.473	3.462	5.353
449236636	3.894	4.952	3.869
449241371	5.218	5.369	5.625
449244969	4.03	5.126	4.134
449250041	5.458	5.652	6.056
449263368	4.236	4.497	4.769
449285328	4.913	5.238	5.285
449288517	5.065	5.606	5.298
449289591	3.383	3.642	3.888
449296405	6.183	6.389	6.61
449296930	4.907	5.852	4.929
449331241	5.674	6.221	5.808
449335798	5.241	5.8	5.354
449438847	7.778	7.974	8.274
449555517	3.532	3.521	5.329
449555633	3.496	3.527	4.965
449564064	3.462	3.48	5.064
449564352	3.474	3.507	5.174
449568848	3.815	3.876	4.879
449568880	3.629	3.639	5.103
449577409	3.619	3.643	5.455
449634539	3.776	4.85	3.774
449681157	4.073	4.961	4.185
449685246	5.909	6.386	6.064
449685778	5.436	6.032	5.632
449749647	6.542	6.719	7.082
449896330	3.842	3.865	5.396
449901277	3.595	3.706	4.769
449905648	4.51	4.648	5.173
449910002	3.117	3.134	5.264
449910481	3.601	3.807	4.226
449910491	3.681	3.683	5.21
449910741	4.17	4.261	4.922
449910907	3.921	3.939	5.026
449931630	3.799	4.912	3.917
449949172	5.436	5.574	6.085
449975227	5.546	5.932	5.921
450004338	5.834	6.11	6.276
450004504	5.471	5.688	6.076
450004562	5.267	5.5	5.682
450004644	5.963	6.132	6.311
450004974	5.814	6.019	6.298
450005014	5.102	5.371	5.646
450008671	3.874	4.251	4.278
450026507	5.163	5.78	5.211
450026735	5.866	6.294	6.095
450034902	4.776	5.565	4.884
450267976	3.575	3.67	5.146
450285679	4.238	5.127	4.318
450294326	4.341	5.143	4.606
450302778	4.046	4.065	5.61
450354788	5.161	5.524	5.54
450371612	5.416	5.872	5.659
450376017	5.502	5.878	5.816
450574212	3.293	3.295	5.394
450579065	3.166	3.155	5.46
450583886	3.982	4.445	4.321
450597298	5.333	5.578	5.796
450609707	3.27	3.298	5.178
450609788	4.89	4.969	5.614
450617762	4.961	5.197	5.456
450635626	4.096	4.992	4.287
450678094	6.036	6.139	6.721
450678237	4.067	4.643	4.273
450700075	3.96	4.56	4.157
450919762	3.951	3.953	5.385
450924155	3.87	3.906	5.56
450933288	3.828	3.773	5.329
450933392	3.573	3.673	4.854
450951445	3.493	3.516	5.571
450971893	5.078	5.173	5.685
451015547	4.544	4.65	5.394
[truncated: 22,550 more rows]
