# Supplementary material for: Information flow, cell types and stereotypy in a full olfactory connectome
Source: eLife. 2021 May 25;10:e66018. doi: 10.7554/eLife.66018 (PMC8298098; doi:10.7554/eLife.66018)
Supplement: Supplementary file 6. — See above for column explanations. Exists as ton.info in our R package hemibrainr. [file elife-66018-supp6.csv]

bodyid	pre	post	upstream	downstream	status	name	voxels	soma	side	connectivity.type	cell.type	class	cellBodyFiber	putative.classic.transmitter	putative.other.transmitter	FAFB.match	FAFB.match.quality	layer	ct.layer	axon.outputs	dend.outputs	axon.inputs	dend.inputs	total.length	axon.length	dend.length	pd.length	segregation_index	notes
693927941	406	1552	1552	2401	Traced	ALIN1_R	2072613254	TRUE	right	ALIN1	ALIN1	TOON	PDM13	unknown	unknown	NA	NA	4.00517598343685	4	2386	14	641	901	4312.67172844217	1238.31762925873	2332.27463755344	227.129095808682	0.380201024772299	NA
704699661	295	1153	1153	1623	Traced	ALIN1_R	2026363558	TRUE	right	ALIN1	ALIN1	TOON	PDM13	unknown	unknown	NA	NA	3.84751037344398	4	1610	13	319	829	4089.1934215818	984.429350178858	2293.5830746831	226.09224342996	0.50408629642826	NA
1036504644	307	459	459	2430	Traced	ALIN3_R	961035642	TRUE	right	ALIN3	ALIN3	TOON	PVL04	unknown	unknown	NA	NA	4.41152263374486	4	2301	16	39	401	2317.09683750797	468.460680766369	1288.34133525359	197.204985610999	0.780048573349025	NA
735091236	314	501	501	2420	Traced	ALIN3_R	1021703998	TRUE	right	ALIN3	ALIN3	TOON	PVL04	unknown	unknown	NA	NA	4.5607476635514	4	2236	10	31	461	2248.63423243561	405.463601959652	1240.72321775035	195.317777600247	0.835379439991528	NA
1813089300	222	443	443	1622	Traced	AOTU032_R	315592755	FALSE	right	AOTU032	AOTU032	WEDPN	AVL01	gaba	unknown	NA	NA	5.29375	5	1061	517	71	365	1523.99161903829	261.781756591692	877.603706826968	126.247746586608	0.179286152071103	NA
1603054747	320	466	466	2277	Traced	AOTU032_R	393313304	FALSE	right	AOTU032	AOTU032	WEDPN	AVL01	gaba	unknown	NA	NA	5.12538860103627	5	1865	382	77	384	1811.02088332863	534.815963539924	920.111601615721	78.6493237476164	0.308058257043507	NA
1441331113	212	566	566	1595	Traced	AOTU032_R	397740675	FALSE	right	AOTU032	AOTU032	WEDPN	AVL01	gaba	unknown	NA	NA	5.1353305785124	5	778	790	66	494	1850.11669908727	241.486245257222	1164.76730750441	126.654526098166	0.113593073221784	NA
1354774257	268	517	517	1838	Traced	AOTU034_R	368859642	FALSE	right	AOTU034	AOTU034	WEDPN	AVL09	unknown	unknown	NA	NA	5.16873706004141	5	1376	462	92	421	1735.28394981371	463.609661335374	975.132559766429	51.0656581310713	0.225732467783656	NA
540290380	243	453	453	1962	Traced	AOTU043_R	594831469	TRUE	right	AOTU043	AOTU043	WEDPN	PDL24	acetylcholine	unknown	NA	NA	5.14629049111808	5	1156	773	62	383	1685.73749041875	218.038954141686	1023.4480193168	147.661438585409	0.145141648866051	NA
1378574332	327	804	804	2666	Traced	AOTU043_R	746603335	TRUE	right	AOTU043	AOTU043	WEDPN	PDL24	acetylcholine	unknown	NA	NA	4.9557157569516	5	1414	1248	135	667	2200.7949184468	266.901560746437	1377.28214764367	142.499307941313	0.0950824678475085	NA
917493211	525	985	985	3160	Traced	AOTU065(SCB052)_R	975099458	TRUE	right	AOTU065	AOTU065	LHN	NA	unknown	NA	NA	NA	6.04830421377184	6	2477	648	251	715	3334.70508837003	892.050160938132	1749.58369570228	95.1389540165386	0.203481728528797	NA
758674661	477	1364	1364	4899	Traced	ATL003_R	1151195317	TRUE	right	ATL003	ATL003	TOON	ADL29	unknown	unknown	NA	NA	6.03305785123967	6	4825	39	486	864	2968.09724041979	964.968142133529	1174.04221901618	63.3160471992275	0.450898186818181	NA
729660692	142	376	376	1341	Traced	ATL009_R	452119098	TRUE	right	ATL009	ATL009	TOON	AVM07	gaba	unknown	NA	NA	5.67835051546392	6	1110	231	45	331	1389.09855304723	392.880151476114	749.732307363594	39.3040743920994	0.367585716871442	NA
729328076	143	349	349	1346	Traced	ATL009_R	443336648	TRUE	right	ATL009	ATL009	TOON	AVM07	gaba	unknown	NA	NA	5.46049896049896	6	1184	116	53	286	1305.74238415145	422.953763811203	650.813793893088	42.7753224536466	0.448979205392683	NA
5813012217	170	359	359	1727	Traced	ATL009_R	518944555	TRUE	right	ATL009	ATL009	TOON	AVM07	gaba	unknown	NA	NA	5.80434782608696	6	1470	234	72	283	1357.90081421081	329.300823438618	750.541513081596	12.8440405305835	0.316493810035618	NA
5813049491	634	1225	1225	4980	Traced	ATL011_R	1285484132	TRUE	right	ATL011	ATL011	TOON	PDL05	acetylcholine	unknown	NA	NA	5.58299180327869	6	1774	3193	181	1025	3153.03500450276	365.036204304903	1829.16342029037	126.983898500875	0.035057130705719	NA
731176276	623	1277	1277	4863	Traced	ATL011(PDL05)_L	922667124	FALSE	right	ATL011	ATL011	TOON	NA	unknown	NA	NA	NA	6.14431934493347	6	1718	3145	182	1091	3001.12424687745	376.126197953892	1894.08483279901	62.0172480732523	0.0371686571766036	NA
728991288	635	1249	1249	4538	Traced	ATL012_R	1077842161	TRUE	right	ATL012	ATL012	TOON	PDL05	acetylcholine	unknown	NA	NA	5.64152892561984	6	3935	552	630	581	3078.19119409722	905.011707420779	1288.26773790548	137.850912955024	0.112125672144654	NA
702200873	578	751	751	4229	Traced	ATL012(PDL05)_L	692538629	FALSE	right	ATL012	ATL012	TOON	NA	unknown	NA	NA	NA	6.12130479102956	6	1500	2721	218	526	2137.97757119002	409.16372817067	1184.04009257739	64.5484517003881	0.00264912206286416	NA
5813041251	608	1143	1143	4264	Traced	ATL012_R	1055849738	TRUE	right	ATL012	ATL012	TOON	PDL05	acetylcholine	unknown	NA	NA	5.76200204290092	6	3723	541	581	530	3024.84492275262	872.862673442505	1263.8434431425	115.183205590101	0.107033621409698	NA
733235394	596	841	841	4271	Traced	ATL012(PDL05)_L	711585111	FALSE	right	ATL012	ATL012	TOON	NA	unknown	NA	NA	NA	6.13163265306122	6	2544	1696	387	415	2197.15296497479	631.362782931753	783.812269562036	139.562383894702	0.00854988860247285	NA
5813078068	580	1242	1242	4605	Traced	ATL015_R	1332405706	TRUE	right	ATL015	ATL015	WEDPN	PDL06	unknown	unknown	NA	NA	5.76116303219107	6	2130	2391	343	872	3215.21878684866	575.946556153571	1867.51498833358	130.713557509904	0.0243328341837045	NA
758636869	114	298	298	802	Traced	ATL019_R	277059369	TRUE	right	ATL019	ATL019	TOON	PDL23	unknown	unknown	NA	NA	4.2672147995889	4	707	8	130	134	1187.84611319962	330.930927753735	369.553614108415	164.00269419495	0.312724012244346	NA
694813336	113	235	235	878	Traced	ATL020_R	200820224	TRUE	right	ATL020	ATL020	TOON	PDL23	unknown	unknown	NA	NA	3.71929824561404	4	340	492	31	177	1108.35041517272	196.671831642432	460.418922656682	177.194362660955	0.0523869971186548	NA
787909611	122	229	229	963	Traced	ATL020_R	284684591	TRUE	right	ATL020	ATL020	TOON	PDL23	unknown	unknown	NA	NA	3.93011305241521	4	745	190	79	141	1046.08500797496	248.985816863073	394.232103503886	125.598013073735	0.135625831268887	NA
882487140	531	1477	1477	3999	Traced	ATL030_R	1526136947	TRUE	right	ATL030	ATL030	TOON	PDM14	unknown	unknown	NA	NA	5.53112033195021	6	3370	586	383	1071	3625.7968163155	839.318282143975	1745.50879725472	129.979502831635	0.265299864714567	NA
699652692	441	849	849	3437	Traced	ATL041_R	1479742819	TRUE	right	ATL041	ATL041	WEDPN	PVL02	unknown	unknown	NA	NA	5.20061412487206	5	2363	1029	242	579	2923.65423322256	914.962892489566	1176.1537046895	120.240651037098	0.106689764099956	NA
1014392280	85	100	100	621	Traced	AVLP010_R	160094104	FALSE	right	AVLP010	AVLP010	LHN	ADL01	gaba	unknown	NA	NA	4.0225641025641	5	526	53	28	70	817.87719352346	220.524881272518	305.826919791352	52.4127662758097	0.303651261948475	aSP6a candidates; AV4c1 (Frechter et al. eLife 2019) (Dolan et al. eLife 2019)
890925383	68	132	132	606	Traced	AVLP010_R	208233064	TRUE	right	AVLP010	AVLP010	LHN	ADL01	gaba	unknown	NA	NA	5.28893442622951	5	497	84	46	78	806.672373663231	291.555137411118	211.635054309765	38.3436715866763	0.177410886737072	aSP6a candidates
5813009998	65	148	148	536	Traced	AVLP010_R	223983385	TRUE	right	AVLP010	AVLP010	LHN	ADL01	gaba	unknown	NA	NA	5.25151515151515	5	385	151	34	110	959.156686729539	185.965086271634	357.62784904543	20.3531013138291	0.157868029126884	aSP6a candidates
1014051490	83	139	139	614	Traced	AVLP010_R	241373686	TRUE	right	AVLP010	AVLP010	LHN	ADL01	gaba	unknown	NA	NA	4.29663608562691	5	482	121	55	68	991.702276152584	233.259165581905	266.884609894621	60.2318753717246	0.0890838210237204	aSP6a candidates; AV4c1 (Frechter et al. eLife 2019) (Dolan et al. eLife 2019)
949870573	86	155	155	595	Traced	AVLP010_R	221026084	TRUE	right	AVLP010	AVLP010	LHN	ADL01	gaba	unknown	NA	NA	5.23132036847492	5	564	31	60	92	1072.76534892446	352.728932142546	343.177849801356	35.2941191044221	0.29257159169038	aSP6a candidates; AV4c1 (Frechter et al. eLife 2019) (Dolan et al. eLife 2019)
1162711771	74	64	64	547	Traced	AVLP013_R	168507817	TRUE	right	AVLP013	AVLP013	LHN	ADL01	gaba	unknown	NA	NA	4.29003021148036	5	435	44	21	35	668.261914465876	184.624428528878	162.254212838724	98.0068565006897	0.22279173731305	NA
1134703538	77	77	77	499	Traced	AVLP013_R	185656334	TRUE	right	AVLP013	AVLP013	LHN	ADL01	gaba	unknown	NA	NA	5.732	5	398	79	23	50	753.790768940498	245.388863145357	211.007895994553	28.809161413415	0.185718298856198	NA
1039267479	78	81	81	711	Traced	AVLP014_R	196727448	TRUE	right	AVLP014	AVLP014	LHN	ADL01	gaba	unknown	NA	NA	3.92705167173252	4	532	164	23	52	850.219505216421	177.756402801854	294.37879569612	86.7072515133052	0.126177677150143	NA
676479217	786	6940	6940	7368	Traced	AVLP015_R	2744314172	TRUE	right	AVLP015	AVLP015	TOON	ADL02	acetylcholine	unknown	NA	NA	5.71134020618557	6	7281	50	481	6421	9695.42480233343	1287.28078645918	7129.11722971405	210.357798721548	0.78735773142346	NA
1107146865	459	1143	1143	3077	Traced	AVLP109_R	665701153	FALSE	right	AVLP109	AVLP109	TOON	AVL02	acetylcholine	unknown	NA	NA	6.42693110647182	7	1393	1684	94	1046	3641.49528957139	377.706711529865	2426.88292885178	55.0241717073013	0.119234665977025	NA
1632639000	382	742	742	2631	Traced	AVLP109_R	539505280	FALSE	right	AVLP109	AVLP109	TOON	AVL02	acetylcholine	unknown	NA	NA	7.02474226804124	7	1127	1504	105	635	2778.8703714666	381.34083150774	1708.13409054982	61.8073346671414	0.0644216979162853	NA
765028935	240	705	705	1675	Traced	AVLP189_b_R	642875258	TRUE	right	AVLP189_b	AVLP189_b	LHN	AVL03	unknown	unknown	NA	NA	5.31386861313869	5	778	834	89	603	2454.15074952395	453.581879139165	1480.19562703761	75.9295530867506	0.102148886806366	NA
765050884	222	738	738	1577	Traced	AVLP189_b_R	620702063	TRUE	right	AVLP189_b	AVLP189_b	LHN	AVL03	unknown	unknown	NA	NA	5.36449579831933	5	154	1133	14	682	2386.95078664825	47.961114422444	1723.06529826644	148.216374704649	0.027596296081576	NA
1386758950	268	989	989	2410	Traced	AVLP511_R	861541820	TRUE	right	AVLP511	AVLP511	TOON	PVL05	unknown	unknown	NA	NA	6.12177502579979	6	2071	319	99	883	2725.83640913319	418.547110453399	1802.54529797686	68.6261772388534	0.460282207973721	NA
1445760214	260	737	737	2153	Traced	AVLP513_R	816312003	TRUE	right	AVLP513	AVLP513	TOON	PVL05	unknown	unknown	NA	NA	6.03219106957425	6	1659	370	114	614	2263.99791969785	528.825329732896	1192.72089085386	84.2294069267272	0.324796291932706	NA
483708083	355	781	781	2894	Traced	AVLP596(SCB064)_R	769510204	TRUE	right	AVLP596	AVLP596	LHN	NA	unknown	NA	NA	NA	4.64760914760915	5	2586	308	195	565	2839.49372882292	713.14737481868	1488.67515879305	86.757024233462	0.318634789449566	NA
5813020846	532	1701	1701	4694	Traced	CL021_R	1370829400	TRUE	right	CL021	CL021	TOON	ADL12	unknown	unknown	NA	NA	4.45218295218295	4	4582	46	401	1267	4304.99827708673	918.699503865745	2415.97717972639	183.092628604363	0.562033456796247	NA
516055524	2962	6209	6209	26182	Traced	CL063_R	6197224227	TRUE	right	CL063	CL063	LHN	AVL06	unknown	unknown	NA	NA	5.47346514047867	5	15824	10239	1853	4290	14699.1502351762	4702.73600023238	7673.07959819059	145.726679405612	0.0602729749513206	NA
361614914	320	827	827	2512	Traced	CL077_R	952456514	TRUE	right	CL077	CL077	LHN	AVL06	unknown	unknown	NA	NA	4.27178423236515	4	1567	942	133	688	2649.28451887632	413.720429534168	1718.52523788706	110.099832041222	0.152342611226766	NA
451982195	248	524	524	1748	Traced	CL077_R	814408022	TRUE	right	CL077	CL077	LHN	AVL06	unknown	unknown	NA	NA	4.35453597497393	4	1591	152	93	428	2283.39499667507	454.706710083853	1269.00125405394	125.455788732194	0.432255482821348	NA
5813071354	421	1252	1252	3391	Traced	CL080_R	1136009519	TRUE	right	CL080	CL080	LHN	AVL06	unknown	unknown	NA	NA	4.37526205450734	5	1582	1800	175	1073	3312.58880181443	390.59416527916	2262.62249222332	126.160329499743	0.0853632741074332	NA
760993807	392	1178	1178	3239	Traced	CL080_R	1039498400	TRUE	right	CL080	CL080	LHN	AVL06	unknown	unknown	NA	NA	5.31262939958592	5	1695	1544	236	940	2931.09655884714	433.097730056505	1863.48236395745	121.765753966211	0.075951268300566	NA
853791166	320	817	817	2417	Traced	CL084_R	866130542	TRUE	right	CL084	CL084	TOON	AVL06	unknown	unknown	NA	NA	5.52277432712215	6	1828	576	229	583	2712.10063647101	614.851600073311	1496.07378249328	156.640230084229	0.16255616280023	NA
1007252570	242	468	468	1732	Traced	CL090_c_R	676802715	TRUE	right	CL090_c	CL090_c	TOON	AVL06	unknown	unknown	NA	NA	5.74585062240664	6	1446	286	181	283	2086.12223130618	493.540557666401	1105.86134529268	112.247320665266	0.150120005977233	NA
483646991	236	473	473	1778	Traced	CL090_c_R	620313233	TRUE	right	CL090_c	CL090_c	TOON	AVL06	unknown	unknown	NA	NA	5.38686131386861	6	1444	333	163	302	1959.51304271445	474.409745044722	1015.20005469134	124.482012682818	0.155258724796464	NA
976213048	213	549	549	1608	Traced	CL090_c_R	633636578	TRUE	right	CL090_c	CL090_c	TOON	AVL06	unknown	unknown	NA	NA	5.85227272727273	6	1363	206	167	365	2091.88769967263	497.366291628181	1012.95478446907	124.927737017417	0.242277257675968	NA
514017455	298	843	843	2351	Traced	CL090_c_R	877534411	TRUE	right	CL090_c	CL090_c	TOON	AVL06	unknown	unknown	NA	NA	5.32608695652174	6	1932	397	269	561	2601.13793703163	646.390320914552	1384.32040795803	155.01758005584	0.193527463468165	NA
422277426	211	417	417	1593	Traced	CL090_c_R	545634444	TRUE	right	CL090_c	CL090_c	TOON	AVL06	unknown	unknown	NA	NA	5.84536082474227	6	1237	337	142	270	1781.26018495172	386.278072771808	992.860215861722	131.336568262039	0.137783345707101	NA
975872458	264	512	512	2058	Traced	CL090_c_R	647018338	TRUE	right	CL090_c	CL090_c	TOON	AVL06	unknown	unknown	NA	NA	5.61192468619247	6	1640	413	198	312	1987.68996657031	474.362046987982	1030.83619664535	117.687417825161	0.121460526184335	NA
914778159	1126	3150	3150	7265	Traced	CL112_R	2155870789	TRUE	right	CL112	CL112	TOON	AVM03	gaba	unknown	NA	NA	5.47199170124481	5	5056	2153	872	2237	6962.06497489801	1961.87683792653	3737.29041159973	158.555463567589	0.1261372709776	NA
853100744	811	1508	1508	7539	Traced	CL130_R	1248713719	TRUE	right	CL130	CL130	VISPN	PDL12	unknown	unknown	NA	NA	6.29326424870466	6	5511	2025	231	1272	4241.91174682494	1069.52983557456	2387.31508805651	61.0957508553959	0.221270664633801	NA
667184255	689	1232	1232	7965	Traced	CL133_R	1184948326	TRUE	right	CL133	CL133	LHN	PDL16	glutamate	unknown	NA	NA	4.32781799379524	4	7701	264	652	564	3698.63356353845	1677.09309621319	1203.56353613521	55.5142130109881	0.218080996712542	NA
417550216	1294	2443	2443	10194	Traced	CL135_R	3016171344	TRUE	right	CL135	CL135	TOON	PDL17	unknown	unknown	NA	NA	4.80584551148225	5	7767	2175	1525	898	5697.43018368132	2868.94591255822	1693.57620461276	123.753625208365	0.0184271517472443	NA
728895864	415	910	910	4581	Traced	CL142_R	712457625	TRUE	right	CL142	CL142	TOON	PDL20	unknown	unknown	NA	NA	5.62238493723849	6	1375	3106	122	777	2440.85121067989	317.641095578171	1343.03674209446	17.9128891400826	0.0252857674990672	NA
883479122	746	2347	2347	5805	Traced	CL150_R	1891473518	TRUE	right	CL150	CL150	LHN	PDM06	unknown	unknown	NA	NA	5.8	6	4902	886	1036	1276	5702.39262512357	1572.5557926618	2979.4718159737	183.11271397315	0.130464448434817	NA
1158726373	87	313	313	795	Traced	CL232_R	294053010	TRUE	right	CL232	CL232	TOON	PDM19	unknown	unknown	NA	NA	5.51390319258496	6	674	114	104	202	1175.01647900669	297.079591680754	435.414180752737	104.001484536426	0.209397832846487	NA
5813097323	93	286	286	800	Traced	CL232_R	280464993	TRUE	right	CL232	CL232	TOON	PDM19	unknown	unknown	NA	NA	6.20988900100908	6	572	221	66	217	1158.0529168812	237.363392891653	527.368696568483	82.2539023050728	0.168067964176261	NA
1315236071	90	357	357	797	Traced	CL232_R	257149389	TRUE	right	CL232	CL232	TOON	PDM19	unknown	unknown	NA	NA	5.95272353545735	6	477	282	60	295	1119.69608698489	189.47792506921	577.743291153731	76.2296806057334	0.156907794935411	NA
764334721	378	711	711	2681	Traced	CL271_R	717642551	TRUE	right	CL271	CL271	TOON	PVL06	unknown	unknown	NA	NA	5.74947807933194	6	2000	598	192	473	2586.89723468623	721.179706092021	1222.63844394584	116.241548279188	0.159976668594202	NA
889859354	333	841	841	2389	Traced	CL271_R	665496253	TRUE	right	CL271	CL271	TOON	PVL06	unknown	unknown	NA	NA	5.40520833333333	6	1895	475	131	704	2496.02998134607	505.259102681991	1439.61740930957	77.7889278898463	0.303604978981771	NA
702985703	203	498	498	1345	Traced	CL272_b_R	462102373	TRUE	right	CL272_b	CL272_b	LHN	PVL06	unknown	unknown	NA	NA	5.40970072239422	5	884	461	133	355	2007.26029419769	436.452619768597	1127.83421010137	83.4913519382276	0.10263494596495	NA
607787538	170	422	422	1033	Traced	CL272_b_R	507257406	TRUE	right	CL272_b	CL272_b	LHN	PVL06	unknown	unknown	NA	NA	4.85523613963039	5	805	201	82	334	2112.15632743208	470.002637386374	1155.48645317095	125.694317000454	0.269944838878036	NA
607799924	167	411	411	1042	Traced	CL272_b_R	457433548	TRUE	right	CL272_b	CL272_b	LHN	PVL06	unknown	unknown	NA	NA	5.10408163265306	5	768	274	111	287	1857.3139462852	389.304053659892	1013.44361354158	110.419631595632	0.149401764243126	NA
483337285	544	1329	1329	4625	Traced	CL359_R	955332657	TRUE	right	CL359	CL359	LHN	PVM14	unknown	unknown	NA	NA	4.88762886597938	5	2709	1862	311	1005	3402.47086951738	752.86152022273	1976.50744010597	76.0662377049973	0.0861640701780981	NA
543718301	543	1239	1239	4461	Traced	CL359_R	1031177433	TRUE	right	CL359	CL359	LHN	PVM14	unknown	unknown	NA	NA	4.40690376569038	5	2528	1809	229	984	3184.67976701344	586.226038445931	1848.0569237806	95.1078213388147	0.107369679080618	NA
732034854	843	2269	2269	9909	Traced	CL362(SCB033)_R	1475630310	TRUE	right	CL362	CL362	LHN	NA	unknown	NA	NA	NA	4.66184074457084	5	5853	3768	309	1928	4857.86396829209	563.524887235111	3195.52636347088	125.135224468388	0.151655237441156	NA
5813097615	372	757	757	4184	Traced	CL364(SCB065)_R	718085131	TRUE	right	CL364	CL364	TOON	NA	unknown	NA	NA	NA	5.49532710280374	5	4010	174	370	368	2300.9948079034	849.580366214024	715.853584088362	79.8079503989266	0.226713270605206	NA
5901213440	2145	19312	19312	15721	Traced	CRE011_R	5816065371	TRUE	right	CRE011	CRE011	LHN	ADM05	unknown	unknown	NA	NA	5.29171038824764	6	11034	4387	414	18819	17579.5574919131	1961.30077967668	13843.3697060303	201.585232076189	0.4526766131926	NA
674882250	706	16635	16635	4337	Traced	CRE011(ADM05)_L	2757238047	TRUE	right	CRE011	CRE011	LHN	NA	unknown	NA	NA	NA	6.42427385892116	6	631	3599	2357	14236	15635.5714316149	2001.23620510294	10996.3851087384	103.590013457361	6.57011634185301e-05	NA
854883067	208	631	631	1443	Traced	CRE014_R	533796828	TRUE	right	CRE014	CRE014	DN	ADM05	unknown	unknown	NA	NA	6.30259067357513	6	1278	140	114	513	1934.06239026899	389.903637138827	1117.34452139147	122.415303308666	0.417793256227358	NA
892398461	186	903	903	1361	Traced	CRE014_R	578553239	TRUE	right	CRE014	CRE014	TOON	ADM05	unknown	unknown	NA	NA	6.23012552301255	6	997	338	107	786	2378.60428010866	263.964003375982	1513.55482728608	206.017525859095	0.307657312313037	NA
894380152	194	705	705	1330	Traced	CRE014_R	519385748	TRUE	right	CRE014	CRE014	TOON	ADM05	unknown	unknown	NA	NA	5.96074380165289	6	774	547	54	642	2121.56027860019	202.531177396233	1381.4218915644	196.058551496753	0.215182745965099	NA
550621853	240	943	943	2006	Traced	CRE018_R	414928286	TRUE	right	CRE018	CRE018	TOON	ADM05	unknown	unknown	NA	NA	5.22325102880658	5	1352	547	631	305	2065.6824222217	1135.1862851466	462.891809070726	61.9136119591768	0.00117661866061947	NA
705462899	230	739	739	1892	Traced	CRE018_R	412132363	TRUE	right	CRE018	CRE018	TOON	ADM05	unknown	unknown	NA	NA	5.24195223260644	5	198	1531	43	684	1856.19575814345	201.969603686542	1189.81470532193	57.3724389687849	0.00648711845757577	NA
703059097	235	1009	1009	1712	Traced	CRE018_R	387251907	TRUE	right	CRE018	CRE018	TOON	ADM05	unknown	unknown	NA	NA	5.33230452674897	5	541	1119	286	714	1983.14017820474	493.542098182098	1070.18003715821	40.7305260950563	0.00132539351007344	NA
581678043	185	1154	1154	1292	Traced	CRE051_R	427763417	TRUE	right	CRE051	CRE051	TOON	AVM07	gaba	unknown	NA	NA	5.1993769470405	5	948	344	211	929	2130.17392742777	405.072141729097	1382.81618591552	15.2129832480149	0.23097622985765	NA
673085197	184	1399	1399	1289	Traced	CRE051_R	489858584	TRUE	right	CRE051	CRE051	TOON	AVM07	gaba	unknown	NA	NA	5.41882109617373	5	979	209	242	1133	2426.02498735984	419.609572058433	1536.33989924019	68.8821662794097	0.32848274030605	NA
706840303	187	1004	1004	1435	Traced	CRE051_R	462141184	TRUE	right	CRE051	CRE051	TOON	AVM07	gaba	unknown	NA	NA	5.27225672877847	5	998	412	143	859	2117.75954140949	307.901926951477	1447.25770956968	53.0408496169324	0.247919114273871	NA
5812982924	191	880	880	1358	Traced	CRE051_R	388927878	TRUE	right	CRE051	CRE051	TOON	AVM07	gaba	unknown	NA	NA	5.4318418314256	5	955	318	176	691	1904.54744443882	365.232045610309	1172.42514217108	42.0165231272775	0.226257443105569	NA
612703762	190	1196	1196	1480	Traced	CRE052_R	497799883	TRUE	right	CRE052	CRE052	TOON	AVM07	gaba	unknown	NA	NA	5.1979381443299	5	993	318	188	976	2149.69293394205	368.562948225264	1333.48841162473	72.5998149856893	0.275810614340579	NA
643739027	190	1052	1052	1514	Traced	CRE052_R	427331936	TRUE	right	CRE052	CRE052	TOON	AVM07	gaba	unknown	NA	NA	5.17489711934156	5	1129	360	183	857	2109.83562945517	465.056538599279	1248.38599179155	14.6202001037766	0.259077373729629	NA
674100160	222	1145	1145	1764	Traced	CRE052_R	443016120	TRUE	right	CRE052	CRE052	TOON	AVM07	gaba	unknown	NA	NA	4.90595611285266	5	1334	365	449	682	2418.49337190264	879.208613104034	1074.10683375675	45.0826613364573	0.116081280972869	NA
736173896	217	777	777	1919	Traced	CRE052_R	364237314	TRUE	right	CRE052	CRE052	TOON	AVM07	gaba	unknown	NA	NA	4.52119958634953	5	1374	472	241	476	1956.87126917925	546.867101412382	859.714401885234	24.4579433369286	0.11949981145596	NA
800273538	208	831	831	1751	Traced	CRE055_R	341182792	TRUE	right	CRE055	CRE055	TOON	AVM07	gaba	unknown	NA	NA	5.04531410916581	5	1065	652	221	603	1980.11580703795	526.779562688029	984.616078247858	25.6369121307282	0.0886954671520966	NA
5813094619	157	440	440	1268	Traced	CRE055_R	304727693	TRUE	right	CRE055	CRE055	TOON	AVM07	gaba	unknown	NA	NA	4.9969450101833	5	861	385	101	335	1413.33144340852	465.605366552612	605.93397770143	23.8598828427485	0.147558215204898	NA
673362451	134	643	643	1073	Traced	CRE055_R	316092230	TRUE	right	CRE055	CRE055	TOON	AVM07	gaba	unknown	NA	NA	4.91975308641975	5	706	236	272	293	1586.2630801015	552.309406052746	490.658135031076	39.6164093853617	0.0553228280304739	NA
829593966	150	667	667	1134	Traced	CRE055_R	323256164	TRUE	right	CRE055	CRE055	TOON	AVM07	gaba	unknown	NA	NA	4.68937048503612	5	815	311	162	461	1685.45102963072	535.098204800031	762.342329038667	16.2837386839953	0.157736676310264	NA
798908816	173	406	406	1469	Traced	CRE055_R	336707467	TRUE	right	CRE055	CRE055	TOON	AVM07	gaba	unknown	NA	NA	4.99590583418628	5	890	488	80	315	1404.13558698392	363.809596815897	587.782965954244	70.8926437207343	0.134384318173508	NA
796836697	235	942	942	2006	Traced	CRE055_R	392754466	TRUE	right	CRE055	CRE055	TOON	AVM07	gaba	unknown	NA	NA	4.98035160289555	5	1238	716	362	563	2216.930600974	709.364650175264	945.805211474932	70.4521548447239	0.0413043304213896	NA
5813011840	146	785	785	1127	Traced	CRE055_R	342775389	TRUE	right	CRE055	CRE055	TOON	AVM07	gaba	unknown	NA	NA	4.91709844559585	5	812	315	340	441	1835.87754256143	782.710742290643	713.562876045602	33.8428424480332	0.0608860325158074	NA
797187575	169	631	631	1320	Traced	CRE055_R	332373336	TRUE	right	CRE055	CRE055	TOON	AVM07	gaba	unknown	NA	NA	4.99590163934426	5	747	563	77	554	1650.30052104317	313.367712762923	964.755192105167	48.8615159115549	0.158545848360215	NA
768884949	211	873	873	1746	Traced	CRE057_R	339435533	TRUE	right	CRE057	CRE057	TOON	AVM07	gaba	unknown	NA	NA	4.8350622406639	5	1310	373	379	474	2111.45249957391	768.296402596954	867.29867790953	51.3090225936495	0.0859286982394925	NA
736839651	186	495	495	1605	Traced	CRE057_R	295279256	TRUE	right	CRE057	CRE057	TOON	AVM07	gaba	unknown	NA	NA	4.53696098562628	5	891	704	112	379	1444.76269102489	318.546262388346	709.59879567084	50.0315777090089	0.0756661889412384	NA
640630581	160	345	345	1459	Traced	CRE058_R	390838368	TRUE	right	CRE058	CRE058	TOON	AVM07	gaba	unknown	NA	NA	4.59445585215606	5	1446	0	49	295	1376.74453782815	467.30849786203	598.037306994376	72.9913405219546	0.753788485388376	NA
702704906	147	450	450	1368	Traced	CRE058_R	392366111	TRUE	right	CRE058	CRE058	TOON	AVM07	gaba	unknown	NA	NA	4.94938016528926	5	1349	0	49	398	1603.93323486266	520.100365462491	724.312078437044	50.1371360079337	0.789304086943608	NA
766493391	168	453	453	1573	Traced	CRE058_R	390043276	TRUE	right	CRE058	CRE058	TOON	AVM07	gaba	unknown	NA	NA	5.0404984423676	5	1490	76	57	391	1538.86225267161	438.341426978386	827.282653894806	11.892540792134	0.576975076745699	NA
798892246	167	338	338	1522	Traced	CRE058_R	402134754	TRUE	right	CRE058	CRE058	TOON	AVM07	gaba	unknown	NA	NA	4.93174767321613	5	1509	0	45	290	1373.65967883811	498.77553041892	579.890301748145	47.1973246931991	0.766874808141867	NA
767174553	141	286	286	1352	Traced	CRE058_R	355804529	TRUE	right	CRE058	CRE058	TOON	AVM07	gaba	unknown	NA	NA	5.15751295336788	5	1344	1	46	235	1330.47594481795	437.044889395118	568.222261250715	48.4505735243989	0.721466032565615	NA
829939688	171	447	447	1571	Traced	CRE058_R	467137880	FALSE	right	CRE058	CRE058	TOON	AVM07	gaba	unknown	NA	NA	4.89457523029683	5	1522	10	43	401	1686.05645235181	417.892409316962	820.400743079493	63.9900819915016	0.768232636952495	NA
733040015	203	451	451	2316	Traced	CRE073_R	402656736	TRUE	right	CRE073	CRE073	TOON	PDL06	unknown	unknown	NA	NA	5.05427974947808	5	2220	0	222	212	1436.93212534191	458.995411079781	536.110589413814	116.561640005016	0.370775455908577	NA
510278421	218	539	539	2492	Traced	CRE073_R	388409272	TRUE	right	CRE073	CRE073	TOON	PDL06	unknown	unknown	NA	NA	5.16238437821172	5	1107	1270	77	445	1546.50497497046	214.308099488199	854.281142870063	118.669217723025	0.0732514457281794	NA
508689623	1362	5662	5662	12866	Traced	CRE074_R	5297906260	TRUE	right	CRE074	CRE074	TOON	PDM08	unknown	unknown	NA	NA	5.8210961737332	6	11980	820	2952	2636	10808.8841878219	4426.12239093792	4955.07994240139	216.333384235688	0.174887003348489	NA
640104852	465	963	963	3981	Traced	CRE078(PDM09)_L	822281488	TRUE	right	CRE078	CRE078	TOON	NA	unknown	NA	NA	NA	6.4769392033543	6	3603	372	325	622	2931.41461300212	966.70717933578	1317.53455361501	74.3559940037099	0.262189831557513	NA
639995972	563	2397	2397	4827	Traced	CRE078_R	1195091614	TRUE	right	CRE078	CRE078	TOON	PDM09	unknown	unknown	NA	NA	5.75184016824395	6	4530	276	781	1586	4950.45623529378	1520.64814073472	2575.5007953391	69.905477770553	0.34071599556001	NA
675767414	549	2080	2080	4812	Traced	CRE078_R	1195877764	TRUE	right	CRE078	CRE078	TOON	PDM09	unknown	unknown	NA	NA	5.72765072765073	6	4673	103	1384	675	4720.15743345044	2734.31102193534	1136.18016324463	122.320073863912	0.148946499701902	NA
643859327	605	1293	1293	5170	Traced	CRE078(PDM09)_L	982563259	TRUE	right	CRE078	CRE078	TOON	NA	unknown	NA	NA	NA	6.55613850996852	6	4936	154	851	405	3322.24382012795	1792.14251721277	776.210210734487	113.703432877104	0.130392653508354	NA
736140238	245	1128	1128	2047	Traced	CRE080_R	854010989	TRUE	right	CRE080	CRE080	TOON	PDM13	unknown	unknown	NA	NA	5.07828810020877	5	1410	516	146	972	3703.50470120991	327.411437625722	2600.14578947752	118.816634577074	0.278109669130154	pMP6b candidates
5901213819	190	781	781	1451	Traced	CRE080(PDM13)_L	932565431	TRUE	right	CRE080	CRE080	TOON	NA	unknown	NA	NA	NA	5.7201646090535	5	789	662	57	719	2371.70829550451	229.774035803216	1507.27933921061	198.980096106941	0.190916648086059	pMP6b candidates
5901193671	277	1561	1561	1914	Traced	CRE080_R	1198498298	TRUE	right	CRE080	CRE080	TOON	PDM13	unknown	unknown	NA	NA	5.32443531827515	5	1159	741	111	1438	3852.38793139127	377.573360820358	2912.27981324598	166.704237920717	0.252585825436139	pMP6b candidates
800286386	217	1045	1045	1679	Traced	CRE080_R	886798893	TRUE	right	CRE080	CRE080	TOON	PDM13	unknown	unknown	NA	NA	5.08659793814433	5	969	675	116	909	3123.55412063614	259.864070785932	2176.47561705021	122.622901397832	0.184556605455373	pMP6b candidates
829050526	113	512	512	745	Traced	CRE080(PDM13)_L	655586347	TRUE	right	CRE080	CRE080	TOON	NA	unknown	NA	NA	NA	5.84394250513347	5	446	278	234	240	2157.49812777632	795.429110470878	698.35693648469	169.057485296496	0.0108462498401184	pMP6b candidates
829059301	199	582	582	1432	Traced	CRE080(PDM13)_L	696799350	TRUE	right	CRE080	CRE080	TOON	NA	unknown	NA	NA	NA	5.73092783505155	5	817	547	76	485	2233.58696194465	160.260149359359	1354.18099517767	257.441878767281	0.162025055973215	pMP6b candidates
5813022811	236	1131	1131	1814	Traced	CRE080_R	1037548628	TRUE	right	CRE080	CRE080	TOON	PDM13	unknown	unknown	NA	NA	5.4122533748702	5	1254	550	159	959	3301.87723333392	336.675254512193	2332.24111108146	185.452453233327	0.235182605635338	pMP6b candidates
517682957	366	722	722	3441	Traced	CRE087(PDM13)_L	880828155	TRUE	right	CRE087	CRE087	TOON	NA	unknown	NA	NA	NA	5.33022774327122	5	3113	322	299	415	2786.77058070339	817.852905862837	1263.51557146709	203.100351864569	0.202997661559109	NA
548575149	323	1016	1016	3062	Traced	CRE087_R	924130762	TRUE	right	CRE087	CRE087	TOON	PDM13	unknown	unknown	NA	NA	5.0850622406639	5	2716	336	237	768	3326.90986527105	664.553187498011	1873.55261144717	222.110196558746	0.33802002546355	NA
762698149	288	613	613	2610	Traced	CRE088(PDM13)_L	706538082	TRUE	right	CRE088	CRE088	TOON	NA	unknown	NA	NA	NA	5.67364016736402	5	2379	166	189	402	2432.21776416376	663.215717346268	1049.84705346793	174.525941896656	0.329168993118432	NA
671657343	343	790	790	3198	Traced	CRE088_R	847542538	TRUE	right	CRE088	CRE088	TOON	PDM13	unknown	unknown	NA	NA	4.88265835929387	5	2803	276	187	578	3019.3353176263	673.503995602797	1609.22580660848	185.078880820729	0.355276263186016	NA
672524871	329	479	479	3203	Traced	CRE088(PDM13)_L	808734559	TRUE	right	CRE088	CRE088	TOON	NA	unknown	NA	NA	NA	5.41544885177453	5	2825	176	165	307	2288.88585038453	605.404157585567	921.472635030023	205.914596478417	0.308031231072173	NA
983905050	329	678	678	2448	Traced	CRE089(PDM13)_L	795056980	TRUE	right	CRE089	CRE089	TOON	NA	unknown	NA	NA	NA	6.1126173096976	6	2409	25	298	365	2465.71142474471	967.528007229955	850.182973878905	173.862418212692	0.358727482060232	pMP6a candidates
673047760	371	756	756	2868	Traced	CRE089_R	852897609	TRUE	right	CRE089	CRE089	TOON	PDM13	unknown	unknown	NA	NA	5.70729166666667	6	2753	110	282	467	2970.25280823776	1042.38625051238	1272.46483291758	95.9364963189134	0.338507607793138	pMP6a candidates
675784199	327	725	725	2765	Traced	CRE089_R	735769767	TRUE	right	CRE089	CRE089	TOON	PDM13	unknown	unknown	NA	NA	5.02063983488132	6	1980	759	149	561	2591.33408184957	776.037237521948	1263.62277584223	63.1787358722611	0.178814919121703	pMP6a candidates
733399215	393	633	633	2983	Traced	CRE089_R	833186272	TRUE	right	CRE089	CRE089	TOON	PDM13	unknown	unknown	NA	NA	5.0846394984326	6	2732	196	178	446	2765.43386176394	927.280040628195	1219.14492229566	47.4296906578691	0.355002337224376	pMP6a candidates
5813022370	392	439	439	3264	Traced	CRE089(PDM13)_L	749086113	TRUE	right	CRE089	CRE089	TOON	NA	unknown	NA	NA	NA	6.19170984455959	6	2866	317	185	240	2078.5600139955	730.68654551734	706.028365255377	171.254293835476	0.175372384436252	pMP6a candidates
702708540	380	700	700	3058	Traced	CRE089_R	866582856	TRUE	right	CRE089	CRE089	TOON	PDM13	unknown	unknown	NA	NA	4.88004136504654	6	2576	415	141	552	2981.17463594989	900.939040570464	1431.2174735462	61.3706302582076	0.317861488218462	pMP6a candidates
702199343	343	414	414	2942	Traced	CRE089(PDM13)_L	632039629	TRUE	right	CRE089	CRE089	TOON	NA	unknown	NA	NA	NA	6.02697095435685	6	2375	561	131	277	2033.31002636634	793.255868961534	773.28282764026	54.5415460079198	0.156755845966605	pMP6a candidates
767329844	434	537	537	3242	Traced	CRE089(PDM13)_L	833421278	TRUE	right	CRE089	CRE089	TOON	NA	unknown	NA	NA	NA	6.04984740590031	6	2956	92	253	262	2381.99661623788	773.479055138103	894.106842562815	273.807400094364	0.260658725141838	pMP6a candidates
800618162	225	763	763	1662	Traced	CRE092_R	674864207	TRUE	right	CRE092	CRE092	TOON	PDM13	unknown	unknown	NA	NA	5.17440660474716	5	1378	274	172	585	2758.01747587487	816.207165040349	1366.35666440412	55.2238123204011	0.281056330174714	pMP6a candidates
642323384	258	660	660	2121	Traced	CRE092_R	739559642	TRUE	right	CRE092	CRE092	TOON	PDM13	unknown	unknown	NA	NA	5.09958932238193	5	1802	283	137	505	2671.52778624726	557.59453326398	1351.10678237192	225.172719390255	0.321630023374319	pMP6a candidates
799249679	283	773	773	2235	Traced	CRE092_R	735169956	TRUE	right	CRE092	CRE092	TOON	PDM13	unknown	unknown	NA	NA	5.11157455683003	5	1680	555	148	621	2686.12068978958	716.125059480616	1434.25709429795	65.0550867555729	0.22330917712389	pMP6a candidates
736632557	277	611	611	2119	Traced	CRE092(PDM13)_L	651556280	TRUE	right	CRE092	CRE092	TOON	NA	unknown	NA	NA	NA	6.05641025641026	5	1357	677	149	443	2298.36365141086	544.222301392674	1135.11255850047	167.5487409828	0.116845460856153	pMP6a candidates
5812983510	221	378	378	1872	Traced	CRE092(PDM13)_L	612886388	TRUE	right	CRE092	CRE092	TOON	NA	unknown	NA	NA	NA	5.97722567287785	5	1529	140	113	243	1853.19308969466	499.578626153932	742.143553606445	200.054468642586	0.295964221956031	pMP6a candidates
765975775	242	473	473	1961	Traced	CRE092(PDM13)_L	628499157	TRUE	right	CRE092	CRE092	TOON	NA	unknown	NA	NA	NA	6.05652620760534	5	1516	386	146	316	1947.8177430154	504.668671837752	806.031539129381	205.82603810157	0.162903924848655	pMP6a candidates
764412104	283	810	810	2395	Traced	CRE092_R	742858087	TRUE	right	CRE092	CRE092	TOON	PDM13	unknown	unknown	NA	NA	4.96569646569647	5	2182	151	175	618	2963.9464166394	711.790385826355	1502.20633893021	153.763558924285	0.432723880185363	pMP6a candidates
5813021046	662	4237	4237	5617	Traced	CRE102_R	1453179886	TRUE	right	CRE102	CRE102	TOON	PDM29	unknown	unknown	NA	NA	5.20414507772021	6	2622	2792	1351	2843	6809.41047449937	1909.41220030045	3464.8124848116	223.283707040036	0.019672381385367	Sm-C
5813061258	355	1818	1818	2951	Traced	CRE102(PDM29)_L	584444385	FALSE	right	CRE102	CRE102	TOON	NA	unknown	NA	NA	NA	6.11389759665622	6	1892	1038	1073	727	3409.88100450089	1605.98314624581	999.823171230213	54.2183655035975	0.00186092685521544	Sm-C
607899687	168	306	306	1365	Traced	CRE103_R	451795630	TRUE	right	CRE103	CRE103	LHN	PVL04	unknown	unknown	NA	NA	4.95557851239669	5	793	547	87	212	1390.57677749349	290.512928948568	592.304892277868	191.08846496842	0.0580354374234754	NA
5813094811	361	947	947	3214	Traced	CRE103_R	797552676	TRUE	right	CRE103	CRE103	LHN	PVL04	unknown	unknown	NA	NA	4.95987654320988	5	1006	2098	87	809	2457.81096108956	294.181210335939	1343.29505335352	343.933070811258	0.0493810936837464	NA
670297553	367	761	761	3375	Traced	CRE103_R	766912633	TRUE	right	CRE103	CRE103	LHN	PVL04	unknown	unknown	NA	NA	4.89979123173278	5	3201	65	649	71	2411.67325974893	1393.64567103062	143.044217303381	353.409489498677	0.0224356144624548	NA
766126400	379	777	777	3445	Traced	CRE103_R	812270188	TRUE	right	CRE103	CRE103	LHN	PVL04	unknown	unknown	NA	NA	5.19544984488108	5	2820	385	322	413	2237.47043261394	933.796728538107	601.277371072599	96.8500376932892	0.160752969347979	NA
705787638	375	928	928	3566	Traced	CRE103_R	781927969	TRUE	right	CRE103	CRE103	LHN	PVL04	unknown	unknown	NA	NA	5.2183316168898	5	2482	904	445	453	2408.5017806383	957.657484663651	718.815172715099	139.020999795531	0.0399439786933571	NA
667266529	838	2509	2509	6132	Traced	CRE108(SCB032)_R	2521064729	TRUE	right	CRE108	CRE108	TOON	NA	unknown	NA	NA	NA	5.18331616889804	5	5931	87	458	2014	6230.8661220802	977.380949653346	4355.29088566631	196.271122832652	0.607423824335828	NA
264083994	394	1231	1231	2857	Traced	DN1a_R	1270566035	TRUE	right	DN1a	DN1a	TOON	PDM10	unknown	unknown	NA	NA	3.41428571428571	3	1966	516	514	597	2804.68843352512	1083.6176409401	821.68852260857	21.10581130415	0.0846427660837886	NA
5813022274	411	1202	1202	2974	Traced	DN1a_R	1384959334	TRUE	right	DN1a	DN1a	TOON	PDM10	unknown	unknown	NA	NA	3.43364681295716	3	1375	1475	189	994	2882.82008536837	651.926756430537	1544.62380456804	32.1791171532738	0.0818198532945364	NA
1406966879	339	11791	11791	1709	Traced	DNb05_R	5673722418	FALSE	right	DNb05	DNb05	DN	AVM22	unknown	unknown	NA	NA	4.18789144050104	4	1110	390	6975	4626	7807.60514054834	3939.09268895821	2873.34731473958	85.358427474584	0.0121794046724349	NA
571346836	325	1335	1335	1164	Traced	DNg30_R	1733411550	FALSE	right	DNg30	DNg30	CONTRA	NA	unknown	NA	NA	NA	5.01979166666667	5	670	358	688	562	3806.68715928937	1567.61252944849	1234.21636618035	283.476224458971	0.00771046589572266	NA
1466998977	73	3517	3517	226	Traced	DNp05_R	2361393183	TRUE	right	DNp05	DNp05	DN	PVM01	unknown	unknown	NA	NA	6.75550891920252	7	84	93	1161	2287	3040.55274620196	768.014155789634	1636.57308016693	111.715027985171	0.00960590057341204	NA
5813047199	130	362	362	742	Traced	DNp24_R	1419360235	TRUE	right	DNp24	DNp24	DN	PDM27	unknown	unknown	NA	NA	5.05828220858896	6	268	446	84	257	2096.25918212329	529.191991111699	708.060502218893	184.321968913636	0.0134041717130264	NA
5813048234	2	11	11	8	Traced	DNp24(PDM27)_L	827039695	TRUE	right	DNp24	DNp24	TOON	NA	unknown	NA	NA	NA	6.902	6	0	0	3	3	506.70050461703	48.1785628706614	13.0385188685917	30.268301827539	0	NA
451689001	165	803	803	852	Traced	DNp25_R	948309595	TRUE	right	DNp25	DNp25	DN	PDM05	unknown	unknown	NA	NA	4.05954825462012	5	638	204	453	341	3123.07488406966	1178.9109700111	1092.45802007094	63.5648417291193	0.0286444378980176	NA
821201495	15	98	98	83	Traced	DNp25(PDM05)_L	738783288	TRUE	right	DNp25	DNp25	TOON	NA	unknown	NA	NA	NA	5.07684529828109	5	34	26	49	40	894.668443106023	258.105980856653	78.4187449944698	65.758394642775	0.000187638082586372	NA
5813050455	3050	6825	6825	12936	Traced	DNp32_R	25174401809	TRUE	right	DNp32	DNp32	DN	PVL15	unknown	unknown	NA	NA	4.99479166666667	5	6788	3364	3160	2567	25414.5811150098	11006.0161658114	6568.2732201765	65.5572873426276	0.0102084935631297	NA
542751938	182	634	634	978	Traced	DNp44_R	1674610618	TRUE	right	DNp44	DNp44	LHON	PVM09	unknown	unknown	NA	NA	3.33639143730887	3	774	198	25	594	2708.3744730942	357.992402904507	1499.54727598996	213.611238885909	0.476552515810047	LHPV9a1 (Frechter et al. eLife 2019)
5813002500	306	488	488	2239	Traced	FB1D_L	583479799	FALSE	right	FB1D	FB1D	TOON	PDL05	acetylcholine	unknown	NA	NA	5.5061099796334	5	2218	11	292	193	1373.83661889077	574.854376024325	354.336982111293	155.817796827544	0.258003052482018	SLPFB1d
5813002689	348	521	521	2499	Traced	FB1D_L	682790450	FALSE	right	FB1D	FB1D	TOON	PDL05	acetylcholine	unknown	NA	NA	5.41386340468909	5	2436	7	355	147	1326.07225898288	574.878545365001	387.960562190119	139.55329144362	0.188012273676372	SLPFB1d
294791509	373	1009	1009	2614	Traced	FB1D_R	1118998843	TRUE	right	FB1D	FB1D	TOON	PDL05	acetylcholine	unknown	NA	NA	4.66493236212279	5	2435	170	321	670	1933.92832933906	585.499107606107	779.856788893254	162.089027059146	0.331718281692192	SLPFB1d
265120597	370	1129	1129	2654	Traced	FB1D_R	1134759777	TRUE	right	FB1D	FB1D	TOON	PDL05	acetylcholine	unknown	NA	NA	4.71858774662513	5	2619	18	382	729	2091.74318938378	671.920950567232	877.748806692661	160.8995124925	0.460575089228216	SLPFB1d
5813078563	500	1142	1142	3656	Traced	FB2H_a_R	1240132665	TRUE	right	FB2H_a	FB2H_a	LHN	PDL05	acetylcholine	unknown	NA	NA	5.91076923076923	6	3447	183	797	328	3297.31149138516	1489.10600889747	880.679367391953	261.271175390828	0.0839221627024226	SIPSCLFB2; LHPV5k1 (Dolan et al. eLife 2019)
5813027679	510	813	813	3447	Traced	FB2H_a_L	864657220	FALSE	right	FB2H_a	FB2H_a	LHN	PDL05	acetylcholine	unknown	NA	NA	6.75678496868476	6	1329	2084	305	494	2133.46243948003	588.049193720981	1083.90690460843	47.3320556974162	3.92205626051911e-05	SIPSCLFB2; LHPV5k1 (Dolan et al. eLife 2019)
732034061	463	1149	1149	3718	Traced	FB2H_b_R	1146417233	TRUE	right	FB2H_b	FB2H_b	LHN	PDL05	acetylcholine	unknown	NA	NA	6.33642930856553	7	3647	50	957	182	3033.96453730706	1548.94162258638	509.214034749976	265.740034667598	0.0627861222678034	SIPSCLFB2; LHPV5k1 (Dolan et al. eLife 2019)
5813061116	500	978	978	3958	Traced	FB2H_b_L	784199736	FALSE	right	FB2H_b	FB2H_b	LHN	PDL05	acetylcholine	unknown	NA	NA	6.82494758909853	7	1522	2422	358	599	2414.65130927314	771.368479432647	952.776850504894	73.2653034343151	9.4199848258425e-05	SIPSCLFB2; LHPV5k1 (Dolan et al. eLife 2019)
789308735	533	1050	1050	3456	Traced	FB2I_b_R	1236152396	TRUE	right	FB2I_b	FB2I_b	TOON	PDL05	acetylcholine	unknown	NA	NA	5.96797520661157	6	3333	88	710	324	3143.25070564267	1403.2866675474	993.048556434646	233.094780956871	0.133132740798728	SMPATLFB2; PV5k1 (Dolan et al. eLife 2019)
729479296	527	896	896	3447	Traced	FB2I_b_L	892295277	FALSE	right	FB2I_b	FB2I_b	TOON	PDL05	acetylcholine	unknown	NA	NA	6.6096807415036	6	3362	34	749	137	2447.01779839261	1543.9216063567	448.139391210839	154.161270962919	0.0670248032275679	SMPATLFB2
667754178	233	629	629	2040	Traced	FB2J_L	435470851	FALSE	right	FB2J	FB2J	TOON	PDL05	acetylcholine	unknown	NA	NA	6.56593977154725	6	2037	3	549	67	1510.31254166389	974.621662331109	306.518932538241	34.535726674445	0.0619900797498383	SMPPLPFB2
1255979929	233	957	957	2094	Traced	FB2J_R	664944772	TRUE	right	FB2J	FB2J	TOON	PDL05	acetylcholine	unknown	NA	NA	5.57363542739444	6	2091	3	592	351	2244.20651891695	957.307239293494	742.746671251459	254.524745565246	0.238243515312294	SMPPLPFB2
1255293862	249	592	592	2196	Traced	FB2J_L	427069527	FALSE	right	FB2J	FB2J	TOON	PDL05	acetylcholine	unknown	NA	NA	6.54648760330578	6	1479	714	374	174	1371.02457234708	673.849819031287	303.118720221799	50.612953741087	4.75795855398031e-05	SMPPLPFB2
761203947	312	615	615	2724	Traced	FB2J_L	499013529	FALSE	right	FB2J	FB2J	TOON	PDL05	acetylcholine	unknown	NA	NA	6.79581151832461	6	1701	1013	341	239	1322.75827435795	624.682855594208	379.158070350737	45.5878033170433	0.00098904300648972	SMPPLPFB2
730337785	285	882	882	2645	Traced	FB2J_R	745034247	TRUE	right	FB2J	FB2J	TOON	PDL05	acetylcholine	unknown	NA	NA	6.175983436853	6	2635	10	572	298	2110.674160579	996.382339294721	624.096966732144	251.701740824657	0.213058332461554	SMPPLPFB2
5813047763	1035	6820	6820	6864	Traced	FB5AB_R	2692585588	TRUE	right	FB5AB	FB5AB	TOON	PDM09	unknown	unknown	NA	NA	5.47302904564315	6	6581	269	2118	4684	11429.6474055219	3228.59443952197	6425.51966645362	93.643489490329	0.379295273533098	SIPCREFB5d
946304488	961	3046	3046	6280	Traced	FB5AB_L	2087646115	TRUE	right	FB5AB	FB5AB	TOON	PDM09	unknown	unknown	NA	NA	6.59917355371901	6	6104	8	2037	955	5882.55922536535	2924.68992224992	1514.27697881971	259.366561292915	0.197511835633257	SIPCREFB5d
487523851	181	1224	1224	1243	Traced	FB5B_R	624525524	TRUE	right	FB5B	FB5B	TOON	PDM25	unknown	unknown	NA	NA	5.30147058823529	6	1188	55	489	723	2506.91824987226	813.075257203509	1158.11729417504	73.9942477820756	0.288317610981489	SMPSIPFB5d_1
548571023	169	849	849	1274	Traced	FB5B_R	537654690	TRUE	right	FB5B	FB5B	TOON	PDM25	unknown	unknown	NA	NA	6.05857740585774	6	1266	2	459	386	2204.59648635877	947.72607439819	772.652674608473	115.665253517031	0.288413176929959	SMPSIPFB5d_1
1070797450	158	967	967	1164	Traced	FB5B_R	523470455	TRUE	right	FB5B	FB5B	TOON	PDM25	unknown	unknown	NA	NA	5.5472481827622	6	1164	0	478	487	2215.36324276889	852.402331301574	904.258547662387	73.4489158448682	0.324631607608628	SMPSIPFB5d_1
549744594	184	741	741	1256	Traced	FB5B_L	571515551	TRUE	right	FB5B	FB5B	TOON	PDM25	unknown	unknown	NA	NA	6.64211618257261	6	1249	7	528	204	1859.59636807506	819.129640351241	475.06989511919	138.376936953924	0.150005536278885	SMPSIPFB5d_1
581121058	170	672	672	1344	Traced	FB5B_L	500543030	TRUE	right	FB5B	FB5B	TOON	PDM25	unknown	unknown	NA	NA	6.74116424116424	6	1339	1	430	235	1841.4560354803	801.546378871629	543.454419513314	139.495623831667	0.224777215194434	SMPSIPFB5d_1
977335062	183	672	672	1359	Traced	FB5B_L	502754651	TRUE	right	FB5B	FB5B	TOON	PDM25	unknown	unknown	NA	NA	6.85208333333333	6	1358	1	537	129	1829.94826980201	1018.94851589743	295.623381655898	137.155441537748	0.114696647207204	SMPSIPFB5d_1
393215048	212	804	804	1450	Traced	FB6Q_L	473741627	TRUE	right	FB6Q	FB6Q	TOON	PDM25	unknown	unknown	NA	NA	6.68665977249224	6	1188	262	518	276	1973.4957517019	818.339471695108	580.367182213618	136.046181287672	0.0260996405289469	SIPSMPFB6_5
360319323	205	1179	1179	1438	Traced	FB6Q_R	586070841	TRUE	right	FB6Q	FB6Q	TOON	PDM25	unknown	unknown	NA	NA	5.35202492211838	6	988	450	405	772	2648.39159594154	748.446546891328	1324.51500248418	77.9215605873613	0.0865327628303322	SIPSMPFB6_5
949045811	266	1297	1297	1532	Traced	FB8B_R	1148747610	TRUE	right	FB8B	FB8B	TOON	PDM21	unknown	unknown	NA	NA	5.96807415036045	6	1440	57	677	585	2822.9768716785	888.35718791065	1342.65649941429	163.572370772136	0.201434321151085	PLPSLPFB8
977995787	238	1080	1080	1331	Traced	FB8B_R	984453101	TRUE	right	FB8B	FB8B	TOON	PDM21	unknown	unknown	NA	NA	5.96509240246407	6	1252	19	595	445	2409.58712762347	804.318723082794	1010.06660623266	172.034501070586	0.220201668237131	PLPSLPFB8
668716892	298	1072	1072	1662	Traced	FB8B_L	979472323	TRUE	right	FB8B	FB8B	TOON	PDM21	unknown	unknown	NA	NA	6.82051282051282	6	1378	200	648	364	2330.48535916959	893.500434867558	768.565638632626	148.782570102371	0.0556090622633897	PLPSLPFB8
885262169	290	763	763	1655	Traced	FB8B_L	847752162	TRUE	right	FB8B	FB8B	TOON	PDM21	unknown	unknown	NA	NA	6.80020597322348	6	453	1147	190	527	1682.80925599165	239.742083908519	874.388621173695	174.100342903385	0.000284695358807485	PLPSLPFB8
727225324	599	1929	1929	6029	Traced	IB116(SCB038)_R	1543850990	TRUE	right	IB116	IB116	TOON	NA	unknown	NA	NA	NA	6.23765432098765	6	4928	1096	276	1634	4632.11640147719	720.114715061081	2514.86455457158	120.964503802857	0.333628821042319	NA
676133767	242	920	920	1909	Traced	LAL030_a_R	411976537	TRUE	right	LAL030_a	LAL030_a	TOON	ADM05	unknown	unknown	NA	NA	5.4437564499484	6	1576	318	338	565	1945.08994426599	490.227515915743	963.623400422014	82.3092192551477	0.164826577130291	NA
674446014	276	1344	1344	2306	Traced	LAL030_a_R	469922607	TRUE	right	LAL030_a	LAL030_a	TOON	ADM05	unknown	unknown	NA	NA	5.3455114822547	6	1347	828	282	1056	2314.92415066357	385.968548246903	1423.98923268518	100.977422857067	0.124946269892105	NA
801283077	218	679	679	1679	Traced	LAL030_a_R	352554148	TRUE	right	LAL030_a	LAL030_a	TOON	ADM05	unknown	unknown	NA	NA	5.73374613003096	6	1407	164	426	247	1647.73489923595	578.924321885515	606.544074181987	122.708048099561	0.0732322762340581	NA
862010850	245	919	919	2027	Traced	LAL030_a_R	435178649	TRUE	right	LAL030_a	LAL030_a	TOON	ADM05	unknown	unknown	NA	NA	5.52061855670103	6	1446	553	362	548	2131.72856978459	638.934995800676	900.424984904825	99.6948668491787	0.0769321490998232	NA
824128501	196	573	573	1480	Traced	LAL030_b_R	338575031	TRUE	right	LAL030_b	LAL030_b	TOON	ADM05	unknown	unknown	NA	NA	5.80041152263374	6	854	586	110	448	1602.16627449727	324.324944659607	782.618679922046	108.175697119294	0.112934913452495	NA
825822254	182	698	698	1337	Traced	LAL030_b_R	366565437	TRUE	right	LAL030_b	LAL030_b	TOON	ADM05	unknown	unknown	NA	NA	5.48232848232848	6	704	613	151	537	1766.26113192889	334.673962352528	901.41067372744	98.0127377363331	0.0746032073252807	NA
1169600852	98	693	693	897	Traced	LAL048_R	452528131	TRUE	right	LAL048	LAL048	TOON	AVL01	gaba	unknown	NA	NA	6.63673890608875	6	872	22	35	651	1646.31413051775	153.3081292324	1025.32856041897	53.7817299750457	0.773334462077672	L-WP2
1200977875	115	834	834	1028	Traced	LAL048_R	502779140	TRUE	right	LAL048	LAL048	TOON	AVL01	gaba	unknown	NA	NA	6.4503582395087	6	1002	18	78	751	1692.96849774693	186.547879104104	1068.20104637535	70.6113418488496	0.712623402971206	L-WP2
1325799415	92	610	610	866	Traced	LAL048_R	440141161	TRUE	right	LAL048	LAL048	TOON	AVL01	gaba	unknown	NA	NA	6.73415132924335	6	808	43	30	578	1671.07697031991	218.707661276809	978.202208668878	71.9730913997414	0.711755033251347	L-WP2
1387527258	106	614	614	912	Traced	LAL048_R	534086070	TRUE	right	LAL048	LAL048	TOON	AVL01	gaba	unknown	NA	NA	6.65396498455201	6	857	27	31	575	1725.54104221462	248.35198673455	881.074589414171	100.27839072778	0.756967297836341	L-WP2
1635112344	134	623	623	1037	Traced	LAL048_R	481341028	TRUE	right	LAL048	LAL048	WEDPN	AVL01	gaba	unknown	NA	NA	5.22371134020619	6	836	192	87	529	1722.99013632634	200.197723405911	1038.34716477304	55.6827680287753	0.350641156649766	L-WP2
5812988559	145	189	189	1151	Traced	LAL065_R	216527036	FALSE	right	LAL065	LAL065	WEDPN	AVL09	unknown	unknown	NA	NA	5.44020618556701	5	940	191	73	108	1284.25720309047	289.488309667948	636.925990315236	66.7770837021069	0.130192406422434	NA
1572701493	114	287	287	759	Traced	LAL065_R	204284206	FALSE	right	LAL065	LAL065	TOON	AVL09	unknown	unknown	NA	NA	5.57823834196891	5	610	79	159	105	1181.7918396649	343.233123820116	373.635303741564	94.7255564669587	0.0796186253626534	NA
1573037501	148	187	187	1067	Traced	LAL065_R	214304301	FALSE	right	LAL065	LAL065	WEDPN	AVL09	unknown	unknown	NA	NA	5.45799180327869	5	822	238	74	106	1092.52871022953	227.072866098109	555.024153089495	58.3135882648182	0.0891249074693367	NA
858237673	158	616	616	1642	Traced	LAL079_R	401486188	TRUE	right	LAL079	LAL079	TOON	AVM07	gaba	unknown	NA	NA	5.74058577405858	6	1275	367	86	527	1887.39258497292	397.449096169323	1164.90582688614	17.7085664851953	0.29814128130822	NA
5813079425	165	503	503	1619	Traced	LAL079_R	393711552	TRUE	right	LAL079	LAL079	TOON	AVM07	gaba	unknown	NA	NA	5.33018867924528	6	1250	369	99	401	1644.17282604558	333.298942894674	962.453614477283	49.1217147701716	0.233944280490764	NA
1657551275	182	1909	1909	1120	Traced	LAL156_R	1905899085	TRUE	right	LAL156	LAL156	WEDPN	PVM03	unknown	unknown	NA	NA	5.74585062240664	6	388	688	15	1885	3692.68472546159	39.10066835401	2691.44711477902	145.034256266066	0.199842869406831	NA
5813054846	143	2154	2154	729	Traced	LAL156_R	1454927854	TRUE	right	LAL156	LAL156	WEDPN	PVM03	unknown	unknown	NA	NA	5.47653806047967	6	209	498	609	1504	4608.16756752995	818.308441018227	2333.20173242143	85.8845947074486	4.4238697569754e-05	NA
1467966209	195	1438	1438	1528	Traced	LAL157_R	1320098646	TRUE	right	LAL157	LAL157	TOON	PVM03	unknown	unknown	NA	NA	6.25779625779626	6	1397	118	73	1349	3409.98029986776	217.399006677119	2376.75482044998	104.599696341379	0.655479003344423	NA
454045389	142	249	249	1188	Traced	LHAD1a1_R	287728627	TRUE	right	LHAD1a1	LHAD1a1	LHON	ADL03	gaba	unknown	NA	NA	4.16701030927835	4	1002	178	61	188	1284.45000252728	301.064186556384	567.766841519193	113.692904123243	0.263070352216141	NA
483716037	177	287	287	1464	Traced	LHAD1a1_R	315076365	TRUE	right	LHAD1a1	LHAD1a1	LHON	ADL03	gaba	unknown	NA	NA	3.67216494845361	4	1229	235	72	214	1386.39727760004	281.386305857932	656.697439042933	91.9003875682674	0.244079227749822	NA
575806223	201	343	343	1658	Traced	LHAD1a1_R	364017065	TRUE	right	LHAD1a1	LHAD1a1	LHON	ADL03	gaba	unknown	NA	NA	3.58239508700102	4	1325	286	80	259	1475.10152368022	302.850729555238	776.114500562789	97.1557154239777	0.240609359286825	L1 (Jeanne et al. Neuron 2018)
545440837	308	402	402	2605	Traced	LHAD1a2_a_R	399148147	TRUE	right	LHAD1a2_a	LHAD1a2_a	LHON	ADL03	gaba	unknown	NA	NA	3.99382716049383	4	1768	639	150	241	1758.92390858026	491.459563770568	735.855049679143	67.9483122904184	0.0785735738201248	NA
576812462	287	458	458	2316	Traced	LHAD1a2_a_R	410860729	TRUE	right	LHAD1a2_a	LHAD1a2_a	LHON	ADL03	gaba	unknown	NA	NA	4.09641025641026	4	1540	640	170	273	1778.39733248437	436.580702033351	765.144655426336	68.1354443474204	0.0675961300632001	NA
734693858	334	546	546	2526	Traced	LHAD1a2_a_R	446098608	TRUE	right	LHAD1a2_a	LHAD1a2_a	LHON	ADL03	gaba	unknown	NA	NA	4.57985757884028	4	1824	613	322	210	1874.53351957757	683.575429350273	608.082870835554	64.484433453603	0.0151668010907303	NA
514073078	318	489	489	2898	Traced	LHAD1a2_b_R	462042565	TRUE	right	LHAD1a2_b	LHAD1a2_b	LHON	ADL03	gaba	unknown	NA	NA	3.52659019812304	4	2073	786	117	371	1864.91150758399	405.131685303044	955.217503376284	91.2340046081672	0.149457613343756	NA
760604568	293	408	408	2589	Traced	LHAD1a2_b_R	448052177	TRUE	right	LHAD1a2_b	LHAD1a2_b	LHON	ADL03	gaba	unknown	NA	NA	3.60103092783505	4	1833	702	101	306	1765.27348911389	379.695116225463	884.172376301159	100.790578064606	0.141435538544929	NA
485430376	294	415	415	2634	Traced	LHAD1a2_c_R	433543548	TRUE	right	LHAD1a2_c	LHAD1a2_c	LHON	ADL03	gaba	unknown	NA	NA	3.63854166666667	4	1983	651	99	316	1670.3146965549	380.691064498835	811.859076141193	91.031698862914	0.168033975193184	NA
667132722	286	480	480	2401	Traced	LHAD1a2_c_R	475399592	TRUE	right	LHAD1a2_c	LHAD1a2_c	LHON	ADL03	gaba	unknown	NA	NA	3.65320910973085	4	1678	636	94	379	1835.94936192561	361.413145905388	982.683064166479	105.902646343278	0.182109143964758	NA
697132415	246	406	406	2295	Traced	LHAD1a3_R	457464384	TRUE	right	LHAD1a3	LHAD1a3	LHON	ADL03	gaba	unknown	NA	NA	3.42311661506708	3	1664	564	123	267	1861.9082690248	477.611439657294	815.67391756621	128.813056422278	0.120141520147519	NA
454706490	261	286	286	2331	Traced	LHAD1a3_R	416671243	TRUE	right	LHAD1a3	LHAD1a3	LHON	ADL03	gaba	unknown	NA	NA	3.57261410788382	3	1763	381	102	162	1401.45946289757	322.401479663666	571.988029111244	122.713503731724	0.127388321124406	AD1a4 (Frechter et al. eLife 2019) (Dolan et al. eLife 2019)
420615275	148	262	262	1263	Traced	LHAD1a4_a_R	399497257	TRUE	right	LHAD1a4_a	LHAD1a4_a	LHON	ADL03	gaba	unknown	NA	NA	3.80809128630705	4	1090	140	137	119	1502.50145863575	535.972021858585	534.280114049973	135.643971912429	0.109412983157805	AD1a1 (Frechter et al. eLife 2019)
421983723	192	345	345	1454	Traced	LHAD1a4_a_R	487721534	TRUE	right	LHAD1a4_a	LHAD1a4_a	LHON	ADL03	gaba	unknown	NA	NA	3.61688980432544	4	1171	269	117	218	1801.83928296384	531.109098787156	784.764151251996	118.971265504921	0.154371604886298	NA
360932188	128	128	128	1163	Traced	LHAD1a4_b_R	277944614	TRUE	right	LHAD1a4_b	LHAD1a4_b	LHON	ADL03	gaba	unknown	NA	NA	4.09268795056643	4	880	239	65	49	1120.77791911607	392.289223718689	339.496310571809	144.516983033158	0.0314015701987399	NA
452651021	107	204	204	853	Traced	LHAD1a4_b_R	305327962	TRUE	right	LHAD1a4_b	LHAD1a4_b	LHON	ADL03	gaba	unknown	NA	NA	3.85788381742739	4	544	223	63	116	1290.66070082712	317.363675034909	508.280607015562	141.406243029555	0.0844701241290742	NA
544107335	306	1229	1229	2392	Traced	LHAD1b2_a_R	605195561	TRUE	right	LHAD1b2_a	LHAD1b2_a	LHON	ADL15	acetylcholine	unknown	NA	NA	3.94681960375391	4	823	1500	304	916	2826.36068781879	362.414152826283	1819.10142029299	179.809233872198	0.00913570679102305	NA
824349873	141	483	483	952	Traced	LHAD1b2_a_R	455520591	TRUE	right	LHAD1b2_a	LHAD1b2_a	LHON	ADL15	acetylcholine	unknown	NA	NA	4.07556935817805	4	370	561	121	353	1745.48314768958	251.800520980449	947.03389364469	185.405464766412	0.0159780313060179	NA
769199010	187	460	460	1218	Traced	LHAD1b2_a_R	491117971	TRUE	right	LHAD1b2_a	LHAD1b2_a	LHON	ADL15	acetylcholine	unknown	NA	NA	3.76359832635983	4	479	713	120	328	1930.13448030461	305.789745847104	1097.75964836015	181.413453800224	0.0135211376994119	AD1c1 (Frechter et al. eLife 2019) (Dolan et al. eLife 2019)
673426956	350	1576	1576	2900	Traced	LHAD1b2_a_R	656979296	TRUE	right	LHAD1b2_a	LHAD1b2_a	LHON	ADL15	acetylcholine	unknown	NA	NA	3.8027139874739	4	844	2030	315	1237	3266.83616337333	321.828646185029	2306.19073764304	212.150896748106	0.00768719170475696	NA
606461310	149	433	433	954	Traced	LHAD1b2_a_R	437126703	TRUE	right	LHAD1b2_a	LHAD1b2_a	LHON	ADL15	acetylcholine	unknown	NA	NA	3.72510373443983	4	439	502	119	311	1714.20553943882	331.291255772512	874.359377329343	169.06968353431	0.0265900704038142	AD1c1 (Frechter et al. eLife 2019) (Dolan et al. eLife 2019)
5813013202	149	393	393	927	Traced	LHAD1b2_a_R	407639481	TRUE	right	LHAD1b2_a	LHAD1b2_a	LHON	ADL15	acetylcholine	unknown	NA	NA	3.6417445482866	4	451	476	101	290	1558.42959833212	291.578879704719	777.376621744852	156.043812604446	0.0381044586700962	ML6 (Jeanne et al. Neuron 2018)
5813022459	223	696	696	1766	Traced	LHAD1b2_b_R	574373649	TRUE	right	LHAD1b2_b	LHAD1b2_b	LHON	ADL15	acetylcholine	unknown	NA	NA	3.93879668049793	4	757	998	203	485	2077.49967238356	364.837178589215	1204.50738505799	203.549752440548	0.0135738409827034	ML1 (Jeanne et al. Neuron 2018)
483017681	176	755	755	1301	Traced	LHAD1b2_b_R	485303768	TRUE	right	LHAD1b2_b	LHAD1b2_b	LHON	ADL15	acetylcholine	unknown	NA	NA	3.80332986472425	4	728	558	173	579	1877.42506683997	273.305952572386	1131.13547820522	149.437879923653	0.0843885243286495	NA
573683438	209	826	826	1718	Traced	LHAD1b2_b_R	530922211	TRUE	right	LHAD1b2_b	LHAD1b2_b	LHON	ADL15	acetylcholine	unknown	NA	NA	3.57245632065776	4	587	1031	190	606	2347.49595165627	323.507439362249	1401.38298124522	189.459707172491	0.0126689839303534	NA
543321179	178	660	660	1420	Traced	LHAD1b2_c_R	560458379	TRUE	right	LHAD1b2_c	LHAD1b2_c	LHON	ADL15	acetylcholine	unknown	NA	NA	3.91855670103093	4	717	670	192	462	2147.03827123818	415.29159139144	1180.95931922431	181.613496319391	0.0359547244860245	NA
574040939	172	490	490	1391	Traced	LHAD1b2_c_R	523365720	TRUE	right	LHAD1b2_c	LHAD1b2_c	LHON	ADL15	acetylcholine	unknown	NA	NA	3.80373831775701	4	676	709	124	353	1725.58855241393	268.698580576128	1012.12298040419	155.596968163597	0.0370009136433636	ML3 (Jeanne et al. Neuron 2018)
5813052205	186	760	760	1408	Traced	LHAD1b2_c_R	528170674	TRUE	right	LHAD1b2_c	LHAD1b2_c	LHON	ADL15	acetylcholine	unknown	NA	NA	3.72559095580678	4	507	828	175	569	2095.97110726681	287.474051580428	1306.52681082801	190.54723740662	0.0172031405134053	ML3 (Jeanne et al. Neuron 2018)
762274975	186	544	544	1415	Traced	LHAD1b2_c_R	476283823	TRUE	right	LHAD1b2_c	LHAD1b2_c	LHON	ADL15	acetylcholine	unknown	NA	NA	3.715625	4	654	747	139	391	1841.82691218313	301.318927774518	1033.69164395078	180.486955230043	0.0304056674604619	AD1c1 (Frechter et al. eLife 2019) (Dolan et al. eLife 2019); ML7 (Jeanne et al. Neuron 2018)
544107243	324	1346	1346	2472	Traced	LHAD1b2_d_R	703122146	TRUE	right	LHAD1b2_d	LHAD1b2_d	LHON	ADL03	gaba	unknown	NA	NA	4.36108220603538	4	761	1711	304	1035	2893.11959265641	379.800450125109	1918.99831631781	123.492864096221	0.00582196197425189	NA
730562988	295	890	890	2075	Traced	LHAD1b2_d_R	530418986	TRUE	right	LHAD1b2_d	LHAD1b2_d	LHON	ADL03	gaba	unknown	NA	NA	4.29979466119097	4	744	1318	279	591	2227.29065206152	344.059842608665	1337.86888675192	173.861348627136	0.00122570378789177	NA
451382570	213	376	376	1529	Traced	LHAD1b3_R	465724557	TRUE	right	LHAD1b3	LHAD1b3	LHON	ADL15	acetylcholine	unknown	NA	NA	3.75670103092784	4	1003	305	134	214	1600.87814686668	300.561093193141	747.551308932532	314.953012000602	0.102649297018017	NA
5813047019	261	518	518	1960	Traced	LHAD1b3_R	600690087	TRUE	right	LHAD1b3	LHAD1b3	LHON	ADL15	acetylcholine	unknown	NA	NA	3.79260780287474	4	1417	413	185	306	1911.22414064286	368.878440375586	955.699679691921	287.76038640311	0.111903865892876	NA
455828904	261	563	563	2121	Traced	LHAD1b3_R	636712663	TRUE	right	LHAD1b3	LHAD1b3	LHON	ADL15	acetylcholine	unknown	NA	NA	4.0741127348643	4	1490	550	140	408	2010.73343903831	260.016838602692	1135.73822445486	289.247974839466	0.153544047978456	NA
638136814	165	379	379	1490	Traced	LHAD1b4_R	289837288	TRUE	right	LHAD1b4	LHAD1b4	LHON	ADL15	acetylcholine	unknown	NA	NA	3.75308641975309	4	866	617	142	236	1469.21057583626	340.417523595763	661.202658751817	171.499193351029	0.0280572335550925	NA
575384259	127	335	335	1048	Traced	LHAD1b4_R	258907019	TRUE	right	LHAD1b4	LHAD1b4	LHON	ADL15	acetylcholine	unknown	NA	NA	3.52587991718427	4	552	482	99	233	1380.66539460123	218.629128435108	747.791999761445	170.357145533076	0.0378864183531006	NA
5813067728	288	640	640	2637	Traced	LHAD1b5_R	532393100	TRUE	right	LHAD1b5	LHAD1b5	LHON	ADL15	acetylcholine	unknown	NA	NA	4.5051867219917	4	1609	872	79	550	2090.22283350281	206.264780575667	1256.38909878551	290.002414227189	0.190316804476098	NA
5901195496	222	561	561	1916	Traced	LHAD1b5_R	611327926	TRUE	right	LHAD1b5	LHAD1b5	LHON	ADL15	acetylcholine	unknown	NA	NA	4.22129436325678	4	1318	539	98	440	2012.0473080973	175.815604553819	1129.70170290691	320.761348337537	0.192828056737868	NA
421957539	264	669	669	2230	Traced	LHAD1b5_R	593629798	TRUE	right	LHAD1b5	LHAD1b5	LHON	ADL15	acetylcholine	unknown	NA	NA	4.29222797927461	4	1425	626	87	567	2144.86878896054	178.093891797367	1323.22771639461	288.241728053516	0.225814098729178	NA
517842578	291	553	553	2609	Traced	LHAD1b5_R	517893963	TRUE	right	LHAD1b5	LHAD1b5	LHON	ADL15	acetylcholine	unknown	NA	NA	4.65388601036269	4	1709	839	81	451	1865.24388913722	220.726780567599	1010.20012266986	286.500511471065	0.178214451921124	NA
513404289	281	533	533	2397	Traced	LHAD1b5_R	463577031	TRUE	right	LHAD1b5	LHAD1b5	LHON	ADL15	acetylcholine	unknown	NA	NA	4.81639004149378	4	1658	650	116	409	1694.0401627327	267.387599303001	873.919205911591	255.921635902643	0.164316330607945	NA
512765816	274	771	771	2157	Traced	LHAD1b6_a_R	579712269	TRUE	right	LHAD1b6_a	LHAD1b6_a	LHON	ADL15	acetylcholine	unknown	NA	NA	4.30503144654088	4	1090	1052	128	630	2153.77229292649	409.067523863011	1303.90230200013	170.261587618564	0.086593626716623	NA
425471220	238	691	691	1888	Traced	LHAD1b6_a_R	552975518	TRUE	right	LHAD1b6_a	LHAD1b6_a	LHON	ADL15	acetylcholine	unknown	NA	NA	3.86645962732919	4	1218	629	162	520	2165.86853979948	508.153309383091	1211.01256814232	168.637608526653	0.12470749928281	AD1b2 (Frechter et al. eLife 2019) (Dolan et al. eLife 2019)
452336897	311	1045	1045	2545	Traced	LHAD1b6_a_R	764359240	TRUE	right	LHAD1b6_a	LHAD1b6_a	LHON	ADL15	acetylcholine	unknown	NA	NA	4.66492146596859	4	1525	957	346	670	2478.99317918905	753.926639634268	1176.83448707103	219.905705524324	0.0520131059124519	NA
611352588	206	822	822	1615	Traced	LHAD1b6_b_R	526859222	TRUE	right	LHAD1b6_b	LHAD1b6_b	LHON	ADL15	acetylcholine	unknown	NA	NA	4.22176165803109	4	695	916	167	652	1990.50539812994	283.095673697365	1204.23539733339	157.375045353844	0.0416090955788148	NA
451995734	265	1014	1014	2026	Traced	LHAD1b6_b_R	629295196	TRUE	right	LHAD1b6_b	LHAD1b6_b	LHON	ADL15	acetylcholine	unknown	NA	NA	4.20927835051546	4	986	1016	213	789	2408.97279438362	365.232096075809	1510.26289141871	163.025918665835	0.060039908949211	NA
729867599	200	1216	1216	1430	Traced	LHAD1c1_a_R	475549959	TRUE	right	LHAD1c1_a	LHAD1c1_a	LHON	ADL15	acetylcholine	unknown	NA	NA	3.61899791231733	4	602	793	177	1026	2458.90227634455	243.580247351935	1698.66035106088	176.356980638438	0.0726808043973554	AD1b2 (Frechter et al. eLife 2019); ML4 (Jeanne et al. Neuron 2018); ML7 (Jeanne et al. Neuron 2018)
705139000	184	842	842	1309	Traced	LHAD1c1_b_R	439040366	TRUE	right	LHAD1c1_b	LHAD1c1_b	LHON	ADL15	acetylcholine	unknown	NA	NA	3.69885773624091	4	682	605	171	662	1981.72300581116	253.19051600055	1257.71867650598	173.574229974502	0.0817674485140613	ML4 (Jeanne et al. Neuron 2018)
424776680	183	220	220	1459	Traced	LHAD1c2_R	381383517	TRUE	right	LHAD1c2	LHAD1c2	LHON	ADL15	acetylcholine	unknown	NA	NA	4.17476732161324	4	924	339	82	121	1384.99442566051	308.73753174009	569.490643100452	276.272752685543	0.0685174762637483	NA
424780893	177	354	354	1415	Traced	LHAD1c2_R	356012036	TRUE	right	LHAD1c2	LHAD1c2	LHON	ADL15	acetylcholine	unknown	NA	NA	3.23541666666667	4	1174	224	55	298	1445.15388243817	355.433988214528	707.318153584358	170.650145970754	0.339628449991281	ML5 (Jeanne et al. Neuron 2018)
424781115	156	208	208	1199	Traced	LHAD1c2_R	311597469	TRUE	right	LHAD1c2	LHAD1c2	LHON	ADL15	acetylcholine	unknown	NA	NA	3.68404588112617	4	969	163	105	94	1192.04822632181	304.130804146406	419.745060764313	257.742602758559	0.0870881105260124	NA
425121959	157	253	253	1146	Traced	LHAD1c2_R	295079098	TRUE	right	LHAD1c2	LHAD1c2	LHON	ADL15	acetylcholine	unknown	NA	NA	3.4896694214876	4	827	304	53	197	1146.42033726832	257.559351146787	506.674024551101	188.78947223657	0.179301182239297	NA
551298257	174	245	245	1332	Traced	LHAD1c2_R	345829825	TRUE	right	LHAD1c2	LHAD1c2	LHON	ADL15	acetylcholine	unknown	NA	NA	3.31682146542828	4	1087	187	53	189	1292.18428831424	280.388166998371	673.904634720422	169.938788520993	0.286374308636955	NA
605046401	127	269	269	930	Traced	LHAD1c3_R	256133727	TRUE	right	LHAD1c3	LHAD1c3	LHON	ADL15	acetylcholine	unknown	NA	NA	3.59228362877998	4	511	387	93	161	1285.85710129854	428.450402787922	369.379749189417	198.830836942838	0.027054781243475	NA
605732731	122	228	228	1041	Traced	LHAD1c3_R	258111523	TRUE	right	LHAD1c3	LHAD1c3	LHON	ADL15	acetylcholine	unknown	NA	NA	3.99795291709314	4	364	660	25	197	1279.79742909846	108.027831843117	695.747792327127	173.067812700505	0.0497726740163107	NA
573328325	157	327	327	1287	Traced	LHAD1c3_R	338065022	TRUE	right	LHAD1c3	LHAD1c3	LHON	ADL15	acetylcholine	unknown	NA	NA	3.73819301848049	4	388	817	35	279	1562.79379470265	175.125255067792	738.033531118745	250.483457061115	0.0407682641517907	NA
574706585	45	105	105	341	Traced	LHAD1c3_R	122040299	TRUE	right	LHAD1c3	LHAD1c3	LHON	ADL15	acetylcholine	unknown	NA	NA	3.63608562691131	4	131	210	12	90	579.467222646184	165.638038978694	279.690849640353	19.9568988869351	0.0608951822336308	NA
574688277	181	399	399	1229	Traced	LHAD1d1_R	377490198	TRUE	right	LHAD1d1	LHAD1d1	LHON	ADL15	acetylcholine	unknown	NA	NA	3.49129989764585	4	841	308	133	256	1631.81269118609	390.452666814579	736.474808335268	275.980133026838	0.106876611608909	NA
638472166	152	363	363	1044	Traced	LHAD1d1_R	333690724	TRUE	right	LHAD1d1	LHAD1d1	LHON	ADL15	acetylcholine	unknown	NA	NA	3.68312757201646	4	606	331	101	226	1391.92970068379	171.768631835288	694.415460834469	294.219875462176	0.0782483176025215	NA
5813035242	143	337	337	957	Traced	LHAD1d1_R	373873271	TRUE	right	LHAD1d1	LHAD1d1	LHON	ADL15	acetylcholine	unknown	NA	NA	3.50102880658436	4	575	286	80	230	1470.55383437146	211.60724511301	735.713765503646	304.673933025341	0.116797945556594	NA
511617404	213	605	605	1508	Traced	LHAD1d1_R	387351374	TRUE	right	LHAD1d1	LHAD1d1	LHON	ADL15	acetylcholine	unknown	NA	NA	3.58127572016461	4	1110	316	188	391	1815.54539320199	309.608326799606	924.612457481504	264.116574274612	0.151127742128894	NA
5813096129	172	408	408	1191	Traced	LHAD1d2_R	342344915	TRUE	right	LHAD1d2	LHAD1d2	LHON	ADL15	acetylcholine	unknown	NA	NA	3.68692070030896	4	874	307	145	261	1774.31551333224	471.496679660632	799.630983565947	210.294542022266	0.103849834369057	NA
391716661	154	196	196	1130	Traced	LHAD1d2_R	328525601	TRUE	right	LHAD1d2	LHAD1d2	LHON	ADL15	acetylcholine	unknown	NA	NA	3.65556711758585	4	894	198	88	107	1261.8833689924	374.488377528493	447.75315019873	216.696763299475	0.0978446478442081	NA
360314997	186	375	375	1302	Traced	LHAD1d2_R	369233354	TRUE	right	LHAD1d2	LHAD1d2	LHON	ADL15	acetylcholine	unknown	NA	NA	3.5774358974359	4	810	365	143	220	1540.23394566423	288.566309127339	727.004419402761	265.622041129037	0.059705311011865	AD1d1 (Dolan et al. eLife 2019)
392307898	141	411	411	1191	Traced	LHAD1f1_R	439257949	TRUE	right	LHAD1f1	LHAD1f1	LHON	ADL02	acetylcholine	unknown	NA	NA	3.82091097308489	4	1019	127	173	235	1618.35812000484	484.757110315085	649.262122613324	127.342504300619	0.185982541007777	NA
420956213	110	450	450	853	Traced	LHAD1f1_R	415351532	TRUE	right	LHAD1f1	LHAD1f1	LHON	ADL02	acetylcholine	unknown	NA	NA	3.9002079002079	4	617	227	168	278	1559.33903509033	434.342132174982	668.489541624006	123.064230258544	0.0922134840548741	NA
453350926	192	580	580	1660	Traced	LHAD1f1_R	482339088	TRUE	right	LHAD1f1	LHAD1f1	LHON	ADL02	acetylcholine	unknown	NA	NA	3.66319082377477	4	1450	167	194	382	2009.71473060383	554.072671883602	937.242692090173	120.642527127923	0.260391665635465	NA
5813055865	842	2993	2993	8480	Traced	LHAD1f2_R	2026708127	TRUE	right	LHAD1f2	LHAD1f2	LHON	ADL02	acetylcholine	unknown	NA	NA	3.49948078920042	3	5621	2734	720	2218	7148.82254928786	1487.97663090106	3972.63064437562	122.918875753736	0.127294320439792	L9 (Jeanne et al. Neuron 2018)
390953189	224	633	633	1968	Traced	LHAD1f3_a_R	549529448	TRUE	right	LHAD1f3_a	LHAD1f3_a	LHON	ADL02	acetylcholine	unknown	NA	NA	3.55590386624869	4	1840	92	183	448	2046.47734931158	579.414950691933	942.252360268869	114.619327386192	0.398318050281402	NA
5901193642	267	678	678	2415	Traced	LHAD1f3_a_R	540253196	TRUE	right	LHAD1f3_a	LHAD1f3_a	LHON	ADL02	acetylcholine	unknown	NA	NA	3.59749739311783	4	2170	183	176	497	2017.86363807967	534.454511116422	1009.02120260823	102.138762266981	0.363251460813494	NA
453026933	249	482	482	2245	Traced	LHAD1f3_b_R	495282757	TRUE	right	LHAD1f3_b	LHAD1f3_b	LHON	ADL02	acetylcholine	unknown	NA	NA	3.76258992805755	4	2078	152	215	258	1727.47514017591	595.12251354281	674.874123525959	105.667979170336	0.215086774714146	NA
545786473	195	518	518	1974	Traced	LHAD1f3_b_R	471014215	TRUE	right	LHAD1f3_b	LHAD1f3_b	LHON	ADL02	acetylcholine	unknown	NA	NA	4.27414330218069	4	1774	195	162	354	1840.76143661926	444.96473616112	938.442691728282	82.7663530750342	0.279896911129357	NA
639240544	228	568	568	2169	Traced	LHAD1f3_b_R	507340924	TRUE	right	LHAD1f3_b	LHAD1f3_b	LHON	ADL02	acetylcholine	unknown	NA	NA	4.13886010362694	4	1962	138	338	217	1978.01835976425	798.055207031945	576.928483209235	155.748662764813	0.120456204085394	NA
546127037	119	538	538	1119	Traced	LHAD1f4_R	450666220	TRUE	right	LHAD1f4	LHAD1f4	LHON	ADL02	acetylcholine	unknown	NA	NA	5.03319502074689	5	662	445	126	408	1799.87331691056	318.017772388669	937.501569728158	97.0879948611564	0.0951409659565327	NA
546472393	87	491	491	931	Traced	LHAD1f4_R	398283584	TRUE	right	LHAD1f4	LHAD1f4	LHON	ADL02	acetylcholine	unknown	NA	NA	4.67954070981211	5	730	201	116	367	1549.20366702235	264.629368805762	762.352083037945	95.1345593494431	0.221024677868663	NA
577835762	116	452	452	1235	Traced	LHAD1f4_R	405454155	TRUE	right	LHAD1f4	LHAD1f4	LHON	ADL02	acetylcholine	unknown	NA	NA	4.59209157127992	5	970	206	112	319	1664.64518456249	321.657910657706	787.148057858127	86.2436530175739	0.23838355832426	NA
577844302	106	613	613	1008	Traced	LHAD1f4_R	407215197	TRUE	right	LHAD1f4	LHAD1f4	LHON	ADL02	acetylcholine	unknown	NA	NA	5.08624229979466	5	673	335	158	454	1804.22947956558	344.201452533531	933.959428820141	88.2087372457926	0.122819792232515	NA
485745927	291	293	293	2583	Traced	LHAD1f5_R	459349752	TRUE	right	LHAD1f5	LHAD1f5	LHON	ADL02	acetylcholine	unknown	NA	NA	3.4923391215526	3	1962	382	91	189	1631.00539281904	431.691197268947	624.859748037752	120.38366134334	0.175075818121919	NA
792326206	3020	12729	12729	19632	Traced	LHAD1g1_R	8169863613	TRUE	right	LHAD1g1	LHAD1g1	LHON	ADL26	unknown	unknown	NA	NA	5.58281573498965	6	13190	5281	6710	4649	16539.2666662889	7660.38896829512	4881.97731423979	113.892662768797	0.0120385565536404	NA
697476780	497	631	631	4754	Traced	LHAD1h1_R	947102090	TRUE	right	LHAD1h1	LHAD1h1	LHON	ADL02	acetylcholine	unknown	NA	NA	3.53567735263702	4	3194	1560	170	458	3056.60236513587	802.733449626709	1514.83839389472	106.70847791487	0.0954531891258118	NA
359905678	140	386	386	1081	Traced	LHAD1i1_R	396248812	TRUE	right	LHAD1i1	LHAD1i1	LHON	ADL03	gaba	unknown	NA	NA	4.08618899273105	4	705	362	83	297	1622.61483648838	277.35159136284	841.140300147404	125.184561539862	0.137188076210635	NA
452651486	136	373	373	961	Traced	LHAD1i1_R	423074699	TRUE	right	LHAD1i1	LHAD1i1	LHON	ADL03	gaba	unknown	NA	NA	4.49793388429752	4	662	272	93	271	1587.92394122677	271.729447300922	751.905899657207	188.5857289437	0.145458346643566	NA
359901157	130	376	376	947	Traced	LHAD1i1_R	357793718	TRUE	right	LHAD1i1	LHAD1i1	LHON	ADL03	gaba	unknown	NA	NA	4.38733125649013	4	596	293	94	276	1652.16930410402	300.352040644423	828.114645435128	128.868882934132	0.122803650348238	NA
327838570	378	1269	1269	2728	Traced	LHAD1k1_R	1141681662	TRUE	right	LHAD1k1	LHAD1k1	LHON	ADL03	gaba	unknown	NA	NA	4.32224532224532	4	2124	599	341	906	3496.25947885199	758.578715367376	1836.09937279061	131.309305518919	0.18953939916913	NA
702364805	1023	1882	1882	10942	Traced	LHAD2b1_R	1468332730	TRUE	right	LHAD2b1	LHAD2b1	LHON	ADL27	unknown	unknown	NA	NA	3.87448132780083	4	9494	1314	144	1715	4333.92698426534	752.668902594907	2783.75406461905	76.6616406017491	0.465963877701593	NA
576843029	238	689	689	2128	Traced	LHAD2c1_R	690464963	TRUE	right	LHAD2c1	LHAD2c1	LHON	ADL12	unknown	unknown	NA	NA	4.84932920536636	5	1055	964	195	483	1938.14310812691	478.863519887168	1019.9240397681	76.54807950847	0.0381430802297141	NA
573713481	266	928	928	2401	Traced	LHAD2c1_R	779774255	TRUE	right	LHAD2c1	LHAD2c1	LHON	ADL12	unknown	unknown	NA	NA	4.49222797927461	5	1821	505	417	497	2585.48677493604	967.860483009057	1075.77800940467	99.0191454004824	0.0814009518094152	NA
666136034	204	743	743	1903	Traced	LHAD2c2_R	587339124	TRUE	right	LHAD2c2	LHAD2c2	LHON	ADL12	unknown	unknown	NA	NA	4.19354838709677	4	1240	658	158	574	2194.64318322964	645.043163464299	1081.62925490933	71.2695209035111	0.135675387491126	NA
917497441	171	670	670	1572	Traced	LHAD2c2_R	524636895	TRUE	right	LHAD2c2	LHAD2c2	LHON	ADL12	unknown	unknown	NA	NA	4.29042224510814	4	862	670	91	567	1995.14958078121	497.453627652787	1075.19527032467	80.178517798943	0.138396077711704	NA
574027813	189	554	554	1741	Traced	LHAD2c3_R	595560843	TRUE	right	LHAD2c3	LHAD2c3	LHON	ADL12	unknown	unknown	NA	NA	4.134994807892	4	1732	9	208	344	1693.82134322634	513.954420538978	851.722955506049	34.6267818031619	0.444688348811706	NA
788519447	153	429	429	1417	Traced	LHAD2c3_R	588800346	TRUE	right	LHAD2c3	LHAD2c3	LHON	ADL12	unknown	unknown	NA	NA	3.91796469366563	4	1342	6	158	267	1694.14868792242	496.944535103304	839.918647817971	64.6794255211691	0.453325236538881	NA
760272462	177	609	609	1670	Traced	LHAD2c3_R	573422196	TRUE	right	LHAD2c3	LHAD2c3	LHON	ADL12	unknown	unknown	NA	NA	4.47979274611399	4	1578	5	360	238	1799.00413898515	788.802071131894	581.391112949199	68.5171674835435	0.254816612382981	NA
706831482	290	1412	1412	2800	Traced	LHAD2d1_R	781569796	TRUE	right	LHAD2d1	LHAD2d1	LHON	ADL27	unknown	unknown	NA	NA	3.85848074921956	4	1971	737	193	1191	3178.39415863091	402.083108648327	1914.81192870661	151.516809047279	0.261707925159337	NA
390952738	304	651	651	2106	Traced	LHAD2e1_R	793610994	TRUE	right	LHAD2e1	LHAD2e1	LHON	ADL12	unknown	unknown	NA	NA	3.43347193347193	3	1642	419	160	469	2448.38578160314	521.379403153976	1207.83959049546	99.6840726857249	0.211053321480722	NA
330604760	419	676	676	3863	Traced	LHAD2e2_R	866136348	TRUE	right	LHAD2e2	LHAD2e2	LHON	ADL12	unknown	unknown	NA	NA	3.80455015511892	4	3519	306	251	411	2850.02337211059	827.56891528093	1268.88466685882	114.824893055923	0.248023377550543	NA
361968122	478	765	765	4109	Traced	LHAD2e3_R	810437363	TRUE	right	LHAD2e3	LHAD2e3	LHON	ADL12	unknown	unknown	NA	NA	4.0146750524109	4	2660	1417	263	480	2787.14094672683	569.437963523519	1366.79284746921	101.88264780529	0.0553377765842998	NA
670219670	217	610	610	1702	Traced	LHAD2f1_R	663971459	TRUE	right	LHAD2f1	LHAD2f1	LHON	ADL12	unknown	unknown	NA	NA	4.04592901878914	4	1562	68	231	371	2101.5755860875	531.853389142789	1062.90525410693	89.7114148203939	0.325186337054267	NA
5813062781	195	390	390	1365	Traced	LHAD3a1_R	503301120	TRUE	right	LHAD3a1	LHAD3a1	LHON	ADL17	acetylcholine	unknown	NA	NA	3.50154479917611	4	688	608	39	348	1997.41088027886	215.8346145474	1151.92605776733	87.1381413531875	0.141737266816006	AD3b1 (Dolan et al. eLife 2019)
361955275	153	540	540	1023	Traced	LHAD3a1_R	615634582	TRUE	right	LHAD3a1	LHAD3a1	LHON	ADL17	acetylcholine	unknown	NA	NA	4.03398558187436	4	594	407	37	500	2346.5257384092	151.550358410541	1562.52175362139	32.2036276872881	0.231382691679247	NA
5813011756	71	107	107	534	Traced	LHAD3a10_a_R	257632847	TRUE	right	LHAD3a10_a	LHAD3a10_a	LHON	ADL17	acetylcholine	unknown	NA	NA	3.75458248472505	4	226	243	17	76	777.572427224657	44.0427168196586	397.878110778706	119.440355639446	0.0610173802245625	NA
5812980272	89	113	113	708	Traced	LHAD3a10_b_R	282193871	TRUE	right	LHAD3a10_b	LHAD3a10_b	LHON	ADL17	acetylcholine	unknown	NA	NA	3.57551020408163	4	604	85	39	71	1035.36779637614	245.682219064375	391.640623450607	74.0095437901383	0.204815574269288	NA
360246734	119	319	319	895	Traced	LHAD3a2_a_R	510727949	TRUE	right	LHAD3a2_a	LHAD3a2_a	LHON	ADL17	acetylcholine	unknown	NA	NA	3.79331941544885	4	680	158	81	229	1362.94499064258	197.910355182468	683.271656872164	73.0740724888393	0.223918369237866	NA
580585427	49	136	136	340	Traced	LHAD3a3_a_R	313301973	TRUE	right	LHAD3a3_a	LHAD3a3_a	LHON	ADL17	acetylcholine	unknown	NA	NA	3.7184265010352	4	206	108	42	85	962.592477546596	103.739987540958	455.51227839888	103.792933522867	0.0737994930983519	NA
5901208044	57	156	156	450	Traced	LHAD3a3_a_R	263855897	TRUE	right	LHAD3a3_a	LHAD3a3_a	LHON	ADL17	acetylcholine	unknown	NA	NA	3.88102564102564	4	298	137	40	111	867.158911224825	108.457028596065	377.242157380763	84.4636890914217	0.122450435921915	NA
421310144	69	202	202	540	Traced	LHAD3a3_b_R	384959509	TRUE	right	LHAD3a3_b	LHAD3a3_b	LHON	ADL17	acetylcholine	unknown	NA	NA	3.79399585921325	4	373	148	50	140	1207.34252869048	181.307132243683	576.33549141392	56.9314852516487	0.144212583561548	NA
580585459	134	476	476	1049	Traced	LHAD3a4_a_R	433925797	TRUE	right	LHAD3a4_a	LHAD3a4_a	LHON	ADL17	acetylcholine	unknown	NA	NA	3.49015544041451	3	660	362	67	406	1677.96867337558	200.138114400946	931.65860103617	57.1187968652897	0.191223310839659	NA
5813010201	88	153	153	833	Traced	LHAD3a4_b_R	344877211	TRUE	right	LHAD3a4_b	LHAD3a4_b	LHON	ADL17	acetylcholine	unknown	NA	NA	3.46351490236382	3	548	249	18	127	1050.74197983654	71.6647636701597	560.475458544761	32.5012529858333	0.20839451983462	NA
360914617	135	663	663	1139	Traced	LHAD3a5_R	484055159	TRUE	right	LHAD3a5	LHAD3a5	LHON	ADL17	acetylcholine	unknown	NA	NA	4.2947259565667	4	634	505	70	592	2044.10663920695	196.643382333057	1302.17724380984	11.633487083029	0.168455118044641	NA
360578907	127	257	257	938	Traced	LHAD3a6_R	297666940	FALSE	right	LHAD3a6	LHAD3a6	LHON	ADL17	acetylcholine	unknown	NA	NA	3.48403707518023	3	645	234	59	193	1211.5300912272	145.929126099094	697.255687712696	51.7386775098354	0.172017108442499	NA
360583021	92	224	224	729	Traced	LHAD3a7_a_R	306641413	TRUE	right	LHAD3a7_a	LHAD3a7_a	LHON	ADL17	acetylcholine	unknown	NA	NA	3.7203302373581	4	571	153	55	165	1152.19037823324	220.574775104152	502.420217801617	36.7002786800743	0.206946989800555	NA
580926422	125	277	277	1011	Traced	LHAD3a7_a_R	226364178	FALSE	right	LHAD3a7_a	LHAD3a7_a	LHON	ADL17	acetylcholine	unknown	NA	NA	3.74536082474227	4	413	579	42	232	1226.37499557993	171.516789467531	673.507048774303	7.42303836838313	0.0540905275216466	NA
580244242	159	305	305	1275	Traced	LHAD3a7_b_R	349714517	TRUE	right	LHAD3a7_b	LHAD3a7_b	LHON	ADL17	acetylcholine	unknown	NA	NA	3.72755741127349	4	1009	166	119	173	1491.76447853914	385.804575414664	540.934158219782	95.8464840473205	0.159955504909608	NA
580926331	96	246	246	741	Traced	LHAD3a8_a_R	303595032	TRUE	right	LHAD3a8_a	LHAD3a8_a	LHON	ADL17	acetylcholine	unknown	NA	NA	3.81404958677686	4	543	117	77	158	1186.72432269482	210.765051944295	426.756197870921	66.7023678261944	0.184572721314827	NA
329906396	114	283	283	871	Traced	LHAD3a8_b_R	323875010	TRUE	right	LHAD3a8_b	LHAD3a8_b	LHON	ADL17	acetylcholine	unknown	NA	NA	3.6353305785124	4	635	231	82	200	1192.74068511221	220.471863042214	473.104293562932	51.1571513172885	0.136642117906179	NA
456427944	97	271	271	842	Traced	LHAD3a9_R	282809897	TRUE	right	LHAD3a9	LHAD3a9	LHON	ADL17	acetylcholine	unknown	NA	NA	3.58756476683938	4	685	150	52	212	1317.23536730196	226.662128709956	592.994860335603	59.6978285626763	0.284428497627393	NA
359913782	99	360	360	733	Traced	LHAD3a9_R	314435322	TRUE	right	LHAD3a9	LHAD3a9	LHON	ADL17	acetylcholine	unknown	NA	NA	3.42355371900826	4	536	132	62	290	1429.28602045887	192.802247273681	725.043243474174	64.4394589752274	0.298001546631203	NA
604009598	162	279	279	1038	Traced	LHAD3b1_a_R	407335654	TRUE	right	LHAD3b1_a	LHAD3b1_a	LHON	ADL17	acetylcholine	unknown	NA	NA	3.53291536050157	4	685	338	57	216	1711.95917482369	213.345040963694	921.603585527503	60.7628604073489	0.143447790925123	NA
391958379	178	379	379	1523	Traced	LHAD3b1_b_R	382234028	TRUE	right	LHAD3b1_b	LHAD3b1_b	LHON	ADL17	acetylcholine	unknown	NA	NA	3.98856548856549	4	1181	326	138	239	1503.08897350537	338.320002633243	684.902093528315	47.075320746644	0.123112320891273	NA
456427965	97	144	144	607	Traced	LHAD3b1_b_R	353230981	TRUE	right	LHAD3b1_b	LHAD3b1_b	LHON	ADL17	acetylcholine	unknown	NA	NA	3.98658410732714	4	442	150	41	102	1154.47915436752	168.869617065952	507.195035200667	37.9541357830627	0.142955369318331	NA
329561615	65	128	128	551	Traced	LHAD3b1_c_R	317879282	TRUE	right	LHAD3b1_c	LHAD3b1_c	LHON	ADL17	acetylcholine	unknown	NA	NA	3.52826310380267	4	490	29	37	86	1154.06789065565	199.222661969572	453.671375855501	76.3938895855907	0.365830658612482	NA
5813035115	49	156	156	259	Traced	LHAD3b1_d_R	265878877	TRUE	right	LHAD3b1_d	LHAD3b1_d	LHON	ADL17	acetylcholine	unknown	NA	NA	3.56611570247934	4	91	153	41	113	988.953214337153	125.893812637098	359.766226118038	61.1907987862872	0.00927973691597861	NA
604705430	186	253	253	1237	Traced	LHAD3b1_e_R	475506142	TRUE	right	LHAD3b1_e	LHAD3b1_e	LHON	ADL17	acetylcholine	unknown	NA	NA	3.58549222797927	3	845	263	56	187	1614.59710120763	281.501273632377	728.154602263059	118.204274833573	0.190569880885681	NA
487454622	135	161	161	999	Traced	LHAD3b1_e_R	415475828	TRUE	right	LHAD3b1_e	LHAD3b1_e	LHON	ADL17	acetylcholine	unknown	NA	NA	3.43595041322314	3	687	268	34	126	1283.68291130801	195.653906131208	566.125661721312	83.0652224992712	0.162685165575741	NA
360236750	71	67	67	601	Traced	LHAD3b1_e_R	230778641	TRUE	right	LHAD3b1_e	LHAD3b1_e	LHON	ADL17	acetylcholine	unknown	NA	NA	3.16332665330661	3	405	160	13	51	951.892176616432	115.408155368563	369.030912159412	84.8437117229503	0.156028493424632	NA
549895967	150	167	167	1124	Traced	LHAD3b1_e_R	438494829	TRUE	right	LHAD3b1_e	LHAD3b1_e	LHON	ADL17	acetylcholine	unknown	NA	NA	3.32815734989648	3	861	255	39	128	1363.4136850305	218.365106440741	658.344759898698	34.4718058885313	0.184548942191805	NA
604364004	163	189	189	1313	Traced	LHAD3b1_e_R	341632360	TRUE	right	LHAD3b1_e	LHAD3b1_e	LHON	ADL17	acetylcholine	unknown	NA	NA	3.37796086508754	3	756	395	27	145	1187.89420437539	159.011887879727	449.968540967902	120.53794103759	0.155712418642731	NA
361269864	88	126	126	630	Traced	LHAD3b1_g_R	274496388	TRUE	right	LHAD3b1_g	LHAD3b1_g	LHON	ADL17	acetylcholine	unknown	NA	NA	3.98146240988671	4	413	107	53	67	1124.77944529437	171.300915886072	426.618280953963	111.327210948482	0.0900112174033334	NA
634038998	88	76	76	753	Traced	LHAD3b1_g_R	267360283	TRUE	right	LHAD3b1_g	LHAD3b1_g	LHON	ADL17	acetylcholine	unknown	NA	NA	3.54954954954955	4	596	69	30	40	894.57727351617	133.317419029722	319.510953920645	59.9231100047467	0.169107088476242	NA
610938082	77	94	94	639	Traced	LHAD3b1_g_R	260342318	TRUE	right	LHAD3b1_g	LHAD3b1_g	LHON	ADL17	acetylcholine	unknown	NA	NA	3.89835728952772	4	621	10	43	50	947.757812648322	225.688980142662	303.961218106017	64.7028888651867	0.328890597154631	NA
457516092	62	118	118	422	Traced	LHAD3b1_g_R	273974735	TRUE	right	LHAD3b1_g	LHAD3b1_g	LHON	ADL17	acetylcholine	unknown	NA	NA	3.34662576687117	4	277	136	27	89	1081.68099316866	113.608426690125	548.219980689329	28.2067873048463	0.129751533356041	NA
457516218	167	238	238	1175	Traced	LHAD3b1_h_R	416203354	TRUE	right	LHAD3b1_h	LHAD3b1_h	LHON	ADL17	acetylcholine	unknown	NA	NA	3.5770423991727	4	792	201	32	193	1318.88196342869	141.348989687848	575.867429572365	164.869219408926	0.299349231984399	NA
512635818	67	210	210	520	Traced	LHAD3c1_R	413020635	TRUE	right	LHAD3c1	LHAD3c1	LHON	ADL17	acetylcholine	unknown	NA	NA	3.57351407716371	4	341	157	17	193	1335.423873168	89.58105003579	760.061940880087	3.41863995180147	0.281800522819317	NA
641291034	141	228	228	1167	Traced	LHAD3d1_R	336463242	TRUE	right	LHAD3d1	LHAD3d1	LHON	ADL17	acetylcholine	unknown	NA	NA	3.63419689119171	4	1033	32	95	114	1329.3135780075	451.338734748868	446.067725618469	133.176328426618	0.291758211558991	NA
485093313	216	223	223	1704	Traced	LHAD3d2_R	404848797	TRUE	right	LHAD3d2	LHAD3d2	LHON	ADL17	acetylcholine	unknown	NA	NA	3.89719626168224	4	1012	661	37	182	1312.03548569206	235.645233900984	757.850314823754	31.0493996278165	0.115309253196105	NA
5813010284	17	94	94	94	Traced	LHAD3d3_R	192953161	TRUE	right	LHAD3d3	LHAD3d3	LHON	ADL17	acetylcholine	unknown	NA	NA	3.23564954682779	3	40	45	28	59	699.783194934418	100.935438939565	211.861843296939	149.353404407248	0.0167598385361439	NA
541615964	310	442	442	2680	Traced	LHAD3d4_R	465124714	TRUE	right	LHAD3d4	LHAD3d4	LHON	ADL17	acetylcholine	unknown	NA	NA	3.84352331606218	4	1835	837	164	270	1818.31380120162	504.685376436823	842.398968353007	59.3605398470186	0.0590175242083115	NA
5813040092	257	300	300	2397	Traced	LHAD3d5_R	453957651	TRUE	right	LHAD3d5	LHAD3d5	LHON	ADL17	acetylcholine	unknown	NA	NA	3.8768115942029	4	1904	491	93	205	1717.97811843718	451.745654475571	756.157636259223	102.608778211528	0.148320462183353	NA
329210713	296	390	390	2324	Traced	LHAD3f1_a_R	546315249	TRUE	right	LHAD3f1_a	LHAD3f1_a	LHON	ADL17	acetylcholine	unknown	NA	NA	3.90625	4	1662	611	131	248	1825.27516182745	416.605306277995	794.319284481754	105.773857624834	0.094481844549633	NA
329215976	202	281	281	1571	Traced	LHAD3f1_a_R	465352232	TRUE	right	LHAD3f1_a	LHAD3f1_a	LHON	ADL17	acetylcholine	unknown	NA	NA	3.92805755395683	4	1314	237	130	146	1451.764468438	386.528413941499	651.94561988985	102.51609054547	0.108482683420652	NA
360238069	162	331	331	1266	Traced	LHAD3f1_a_R	355721512	TRUE	right	LHAD3f1_a	LHAD3f1_a	LHON	ADL17	acetylcholine	unknown	NA	NA	3.98963730569948	4	1168	74	187	131	1553.06551481386	606.046845734347	471.202044662013	127.854510135435	0.140715271910171	NA
604700963	225	305	305	1483	Traced	LHAD3f1_b_R	437989241	TRUE	right	LHAD3f1_b	LHAD3f1_b	LHON	ADL17	acetylcholine	unknown	NA	NA	3.69015544041451	4	970	466	129	162	1620.40468696347	535.10838254757	597.707340030825	99.8907811877427	0.0347096246632254	NA
547457113	166	333	333	1172	Traced	LHAD3f1_b_R	403908845	TRUE	right	LHAD3f1_b	LHAD3f1_b	LHON	ADL17	acetylcholine	unknown	NA	NA	3.82830385015609	4	878	264	152	172	1626.8603210657	535.274982396695	673.635896751353	63.9035699838421	0.0656754539065584	NA
421620469	279	346	346	1878	Traced	LHAD3f1_b_R	449064897	TRUE	right	LHAD3f1_b	LHAD3f1_b	LHON	ADL17	acetylcholine	unknown	NA	NA	3.83609958506224	4	717	1102	66	276	1723.4996557619	266.333636757357	988.061427829469	41.8183098742926	0.029000112389451	NA
516832391	170	552	552	1519	Traced	LHAD3g1_R	376882691	TRUE	right	LHAD3g1	LHAD3g1	LHON	ADL14	unknown	unknown	NA	NA	4.69475847893114	5	973	515	262	274	1774.30385572113	551.507706081296	637.141292008992	39.7657918240825	0.0190024670437476	NA
487148422	159	435	435	1373	Traced	LHAD3g1_R	335761163	TRUE	right	LHAD3g1	LHAD3g1	LHON	ADL14	unknown	unknown	NA	NA	4.41382868937048	5	870	488	140	295	1528.58649995561	355.103504988815	736.671000843745	70.2618805156824	0.0687329389481304	NA
5813014526	98	286	286	906	Traced	LHAD3g1_R	273555399	TRUE	right	LHAD3g1	LHAD3g1	LHON	ADL14	unknown	unknown	NA	NA	4.41486068111455	5	586	320	65	216	1095.72587167779	290.69021695401	509.221044875647	44.3771134438668	0.118287298881996	NA
5813021632	573	797	797	4418	Traced	LHAD4a1_R	1303199570	TRUE	right	LHAD4a1	LHAD4a1	LHON	ADL28	unknown	unknown	NA	NA	3.01865284974093	3	2483	1875	228	551	3160.52073843741	830.409417202868	1443.09195045575	242.602575325059	0.0474225748057878	NA
789588935	250	792	792	1908	Traced	LHAV1a1_R	606048086	TRUE	right	LHAV1a1	LHAV1a1	LHON	AVL02	acetylcholine	unknown	NA	NA	3.33473242392445	3	1098	729	126	660	1875.9758305794	332.859666741878	1165.15337078966	54.3259799759491	0.144648824762471	AV1a2 (Dolan et al. eLife 2019)
820563959	229	538	538	1964	Traced	LHAV1a1_R	519151090	TRUE	right	LHAV1a1	LHAV1a1	LHON	AVL02	acetylcholine	unknown	NA	NA	3.25929752066116	3	1229	670	76	455	1677.47923541097	333.301627541666	993.42311836554	56.4639132455205	0.177821601275046	NA
883338122	235	927	927	1597	Traced	LHAV1a1_R	657849247	TRUE	right	LHAV1a1	LHAV1a1	LHON	AVL02	acetylcholine	unknown	NA	NA	3.30561330561331	3	1095	466	140	780	1868.66890560547	342.705100830371	1132.45544524601	66.9792314457297	0.229669501647905	NA
917450071	218	1004	1004	1367	Traced	LHAV1a2_a_R	593117915	TRUE	right	LHAV1a2_a	LHAV1a2_a	LHON	AVL02	acetylcholine	unknown	NA	NA	3.3464322647363	3	710	645	154	839	2093.62724148043	439.794275016023	1200.19427448784	50.3980708154411	0.111666052690223	NA
855384597	217	716	716	1421	Traced	LHAV1a2_a_R	564327087	TRUE	right	LHAV1a2_a	LHAV1a2_a	LHON	AVL02	acetylcholine	unknown	NA	NA	3.63721413721414	3	572	734	167	534	2149.62084517374	606.39746251738	981.120514080585	147.922560724741	0.0312285794461211	NA
915724147	227	1475	1475	1422	Traced	LHAV1a2_b_R	667185898	TRUE	right	LHAV1a2_b	LHAV1a2_b	LHON	AVL02	acetylcholine	unknown	NA	NA	3.240625	3	830	545	106	1364	2310.10646833347	298.07421654146	1567.36810698668	50.9265852102504	0.25277355722489	NA
883018168	153	323	323	952	Traced	LHAV1a3_R	398614310	TRUE	right	LHAV1a3	LHAV1a3	LHON	AVL02	acetylcholine	unknown	NA	NA	3.41065830721003	4	358	558	100	207	1359.10596402071	304.06447349291	597.780946182021	203.458276222026	0.00305840309445549	NA
823999645	193	413	413	1253	Traced	LHAV1a3_R	496299765	TRUE	right	LHAV1a3	LHAV1a3	LHON	AVL02	acetylcholine	unknown	NA	NA	3.59086188992731	4	613	605	160	241	1559.40682557411	617.644275765609	498.179258896122	97.6701997444022	0.00730163051182875	NA
855439675	205	424	424	1237	Traced	LHAV1a3_R	506352489	TRUE	right	LHAV1a3	LHAV1a3	LHON	AVL02	acetylcholine	unknown	NA	NA	3.91891891891892	4	700	498	212	197	1708.72964516959	742.404441221483	476.870992712735	106.257164528211	0.00295182079028589	NA
854680421	139	322	322	929	Traced	LHAV1a3_R	417994560	TRUE	right	LHAV1a3	LHAV1a3	LHON	AVL02	acetylcholine	unknown	NA	NA	3.49536560247168	4	317	580	85	231	1343.83453334931	303.859054872451	622.307514111311	186.262859682837	0.00553145474527172	NA
913341672	163	365	365	1037	Traced	LHAV1a3_R	434750816	TRUE	right	LHAV1a3	LHAV1a3	LHON	AVL02	acetylcholine	unknown	NA	NA	3.68930041152263	4	350	594	80	279	1523.81236087252	340.972141444648	694.358062707625	177.419553519858	0.0175521345182594	NA
1041253084	128	265	265	782	Traced	LHAV1a3_R	329763667	TRUE	right	LHAV1a3	LHAV1a3	LHON	AVL02	acetylcholine	unknown	NA	NA	3.8641975308642	4	268	460	59	196	1209.68655393054	281.656979134059	494.423006058816	166.600267607989	0.0147551337331039	NA
1289190689	185	282	282	1458	Traced	LHAV1a4_R	373555486	TRUE	right	LHAV1a4	LHAV1a4	LHON	AVL02	acetylcholine	unknown	NA	NA	3.46494845360825	3	1270	171	64	216	1334.37109272215	346.970819267698	664.761321382696	43.6506706067738	0.316468200881068	NA
914026662	172	187	187	1357	Traced	LHAV1a4_R	330762144	TRUE	right	LHAV1a4	LHAV1a4	LHON	AVL02	acetylcholine	unknown	NA	NA	3.52102564102564	3	1196	161	37	144	1178.00913695938	343.924904446099	519.433412376138	61.1691300695174	0.323207387288605	NA
946081491	184	301	301	1447	Traced	LHAV1a4_R	377407075	TRUE	right	LHAV1a4	LHAV1a4	LHON	AVL02	acetylcholine	unknown	NA	NA	3.47314049586777	3	1264	183	71	226	1431.74036800987	335.688359523098	756.095974936979	42.5557275600673	0.298112777533107	NA
882987799	100	116	116	693	Traced	LHAV1a5_R	299646595	TRUE	right	LHAV1a5	LHAV1a5	LHON	AVL02	acetylcholine	unknown	NA	NA	3.49340101522843	3	419	274	21	94	1138.95959309166	274.070597540317	480.809262421526	41.5396441060686	0.112277302093945	NA
857455968	154	197	197	1182	Traced	LHAV1b1_R	353342937	TRUE	right	LHAV1b1	LHAV1b1	LHON	AVL02	acetylcholine	unknown	NA	NA	3.65235173824131	4	918	264	58	133	1439.56230272286	414.758132997241	603.090114932848	96.5634651851353	0.145655536655529	NA
1068523766	94	211	211	637	Traced	LHAV1b2_R	270077948	TRUE	right	LHAV1b2	LHAV1b2	LHON	AVL02	acetylcholine	unknown	NA	NA	3.39897959183673	3	257	313	46	142	949.915108988976	146.313593203072	368.438987788154	263.895150644165	0.030892850335865	NA
824380581	157	351	351	1293	Traced	LHAV1b3_R	418257871	TRUE	right	LHAV1b3	LHAV1b3	LHON	AVL02	acetylcholine	unknown	NA	NA	4.50414937759336	4	669	531	110	227	1692.99488393264	296.012603340773	930.080099890385	129.784765878199	0.035313994046738	NA
698888718	181	360	360	1478	Traced	LHAV1b3_R	449286921	TRUE	right	LHAV1b3	LHAV1b3	LHON	AVL02	acetylcholine	unknown	NA	NA	4.45681581685744	4	982	442	110	237	1665.72736643729	287.449353285204	949.849473098758	137.152166318837	0.0915171310980837	NA
5813013207	117	217	217	934	Traced	LHAV1b4_R	379274708	TRUE	right	LHAV1b4	LHAV1b4	LHON	AVL02	acetylcholine	unknown	NA	NA	3.77938144329897	4	830	84	87	122	1473.40280487507	474.008914181238	528.634607668151	139.11495621291	0.208908811035384	NA
919185724	110	193	193	851	Traced	LHAV1c1_R	427141414	TRUE	right	LHAV1c1	LHAV1c1	LHON	AVL02	acetylcholine	unknown	NA	NA	3.41361256544503	3	457	186	52	126	1367.58514396586	167.52865379513	573.268036426958	152.482498474914	0.118632919969572	NA
668489498	139	228	228	1051	Traced	LHAV1d1_R	433130216	TRUE	right	LHAV1d1	LHAV1d1	LHON	AVL10	unknown	unknown	NA	NA	3.53567735263702	4	631	396	66	148	1397.80892322408	207.053860436804	597.233541151147	204.470267657128	0.0592252368713242	NA
5813047150	84	238	238	589	Traced	LHAV1d1_R	452941247	TRUE	right	LHAV1d1	LHAV1d1	LHON	AVL10	unknown	unknown	NA	NA	3.51958762886598	4	328	226	107	120	1389.16780607404	590.479386754233	366.418345415001	89.3770751355579	0.0100566489044935	NA
424366776	66	538	538	434	Traced	LHAV1d2_a_R	426984083	TRUE	right	LHAV1d2_a	LHAV1d2_a	LHON	AVL10	unknown	unknown	NA	NA	4.32368148914168	4	74	310	89	423	1628.37752690111	136.145405577035	1021.10646359989	145.937952433648	0.000427984134852233	NA
361259770	87	620	620	592	Traced	LHAV1d2_a_R	549834174	TRUE	right	LHAV1d2_a	LHAV1d2_a	LHON	AVL10	unknown	unknown	NA	NA	3.88345473465141	4	345	232	344	256	1841.42012068402	680.166493716729	592.781919180168	137.543106357383	0.000449221820429502	NA
361959852	76	442	442	527	Traced	LHAV1d2_a_R	479241339	TRUE	right	LHAV1d2_a	LHAV1d2_a	LHON	AVL10	unknown	unknown	NA	NA	3.75286757038582	4	231	184	217	213	1525.85113074926	442.656073908115	684.100951125404	104.194413762969	0.0019566717836853	NA
424706955	71	302	302	566	Traced	LHAV1d2_a_R	465811943	TRUE	right	LHAV1d2_a	LHAV1d2_a	LHON	AVL10	unknown	unknown	NA	NA	3.98765432098765	4	262	247	113	174	1341.09491858319	487.101645121198	384.648807708701	106.845488413047	0.0104222398212545	NA
5813047192	84	206	206	641	Traced	LHAV1d2_b_R	466713527	TRUE	right	LHAV1d2_b	LHAV1d2_b	LHON	AVL10	unknown	unknown	NA	NA	3.67291666666667	4	378	186	108	82	1215.56999899833	369.022104122753	469.856546358019	104.691330927498	0.00742130671132779	NA
390271033	696	1612	1612	6454	Traced	LHAV1e1_R	1369684294	TRUE	right	LHAV1e1	LHAV1e1	LHON	NA	unknown	NA	NA	NA	4.47156153050672	4	3987	2262	903	667	4924.6994656042	1875.304479057	1571.10698979589	185.275335537549	0.00266730116989344	NA
883030091	126	343	343	1044	Traced	LHAV2a1_R	254749864	TRUE	right	LHAV2a1	LHAV2a1	LHON	ADL04	acetylcholine	unknown	NA	NA	3.22348094747683	3	717	327	78	261	1361.3451786705	209.321008340957	721.633863230317	46.9574393569916	0.144399977088247	NA
638826442	148	367	367	1248	Traced	LHAV2a1_R	246018377	TRUE	right	LHAV2a1	LHAV2a1	LHON	ADL04	acetylcholine	unknown	NA	NA	3.25799793601651	3	693	550	71	296	1466.74162184367	177.241206248049	819.892438195685	50.5245694751495	0.0928790287456418	NA
886066221	144	305	305	1194	Traced	LHAV2a1_R	202579329	TRUE	right	LHAV2a1	LHAV2a1	LHON	ADL04	acetylcholine	unknown	NA	NA	3.33983572895277	3	728	466	73	231	1235.1478287058	202.787193157595	645.197684041791	41.2707534463132	0.0906621064863271	NA
948135822	200	413	413	1542	Traced	LHAV2a2_R	347594860	TRUE	right	LHAV2a2	LHAV2a2	LHON	ADL04	acetylcholine	unknown	NA	NA	3.73498964803313	4	1009	480	140	261	1565.69759860852	391.962965354884	617.284162144822	83.1612880665927	0.0718786956941601	NA
486444499	193	333	333	1658	Traced	LHAV2a2_R	284609907	TRUE	right	LHAV2a2	LHAV2a2	LHON	ADL04	acetylcholine	unknown	NA	NA	4.2972972972973	4	1049	538	134	190	1226.0282639414	374.542153074439	386.923286459638	94.6285034687781	0.039003878623164	NA
674001478	165	307	307	1528	Traced	LHAV2a2_R	258709661	TRUE	right	LHAV2a2	LHAV2a2	LHON	ADL04	acetylcholine	unknown	NA	NA	4.23991726990693	4	891	522	113	179	1053.69909511329	245.766275496647	375.745494400699	111.172717548523	0.0374048622529115	NA
612285653	172	447	447	1495	Traced	LHAV2a2_R	273993727	TRUE	right	LHAV2a2	LHAV2a2	LHON	ADL04	acetylcholine	unknown	NA	NA	3.90466321243523	4	937	496	133	297	1256.66290548528	314.649590674498	526.708130262994	114.977616957688	0.0798644254196136	NA
580546081	188	598	598	1459	Traced	LHAV2a3_R	357328518	TRUE	right	LHAV2a3	LHAV2a3	LHON	ADL04	acetylcholine	unknown	NA	NA	3.72054223149114	4	1256	188	202	391	1601.99603985039	419.859893605535	668.850653230181	61.8057814944798	0.225503298632941	NA
640220321	183	477	477	1371	Traced	LHAV2a3_R	330219769	TRUE	right	LHAV2a3	LHAV2a3	LHON	ADL04	acetylcholine	unknown	NA	NA	3.62148070907195	4	1217	147	135	339	1499.12991655131	336.073389273756	686.436979644403	62.8367010746803	0.297595229783937	AV4b3 (Dolan et al. eLife 2019)
5813013530	151	530	530	1071	Traced	LHAV2a3_R	285069203	TRUE	right	LHAV2a3	LHAV2a3	LHON	ADL04	acetylcholine	unknown	NA	NA	3.4559585492228	4	914	113	115	408	1636.15355089012	286.398767688813	848.572786904012	52.3619928226775	0.361421033758506	NA
5813013792	128	320	320	910	Traced	LHAV2a3_R	257203621	TRUE	right	LHAV2a3	LHAV2a3	LHON	ADL04	acetylcholine	unknown	NA	NA	3.46473029045643	4	792	118	97	222	1218.36410956277	229.836963583614	563.566445477031	49.56753388926	0.25268278401299	NA
638476210	235	291	291	2061	Traced	LHAV2a4_a_R	423814663	TRUE	right	LHAV2a4_a	LHAV2a4_a	LHON	ADL04	acetylcholine	unknown	NA	NA	3.52484472049689	4	1639	397	125	158	1471.79255787188	374.929799914508	557.959167721006	53.7911267800981	0.0899760535068259	NA
668152044	247	320	320	2130	Traced	LHAV2a4_a_R	457035658	TRUE	right	LHAV2a4_a	LHAV2a4_a	LHON	ADL04	acetylcholine	unknown	NA	NA	3.77282157676349	4	1756	366	139	173	1627.57681972936	381.617709259708	675.306869000807	48.3454466178165	0.10390652320647	NA
575418068	243	286	286	1907	Traced	LHAV2a4_b_R	488372022	TRUE	right	LHAV2a4_b	LHAV2a4_b	LHON	ADL04	acetylcholine	unknown	NA	NA	3.63477366255144	4	1347	534	91	185	1569.78597855377	382.126709673607	616.390801420521	54.0285264652066	0.0918728317362317	NA
5813057923	209	301	301	1775	Traced	LHAV2a5_a_R	387907486	TRUE	right	LHAV2a5_a	LHAV2a5_a	LHON	ADL04	acetylcholine	unknown	NA	NA	3.69844559585492	4	1592	169	121	177	1486.01629826795	312.860914009912	657.860277280497	55.4067905179889	0.204716034663935	NA
5813013183	158	224	224	1258	Traced	LHAV2a5_a_R	320117027	TRUE	right	LHAV2a5_a	LHAV2a5_a	LHON	ADL04	acetylcholine	unknown	NA	NA	3.81390593047035	4	1164	89	82	139	1309.67258314276	291.014559530297	546.594823953378	61.910932907772	0.269752842699694	NA
607109790	126	200	200	954	Traced	LHAV2a5_b_R	345962518	TRUE	right	LHAV2a5_b	LHAV2a5_b	LHON	ADL04	acetylcholine	unknown	NA	NA	3.77422680412371	4	905	49	88	106	1143.29860305844	360.918932359609	431.000147941373	65.292162900852	0.244610830762248	NA
638148213	160	201	201	1258	Traced	LHAV2a5_b_R	335893985	TRUE	right	LHAV2a5_b	LHAV2a5_b	LHON	ADL04	acetylcholine	unknown	NA	NA	4.12008281573499	4	1180	78	88	110	1214.44348336633	324.240788731805	502.70560519757	50.5001829680941	0.227502973052277	NA
944724233	170	549	549	1282	Traced	LHAV2b1_R	342071111	TRUE	right	LHAV2b1	LHAV2b1	LHON	AVL07	unknown	unknown	NA	NA	3.59436913451512	4	1234	41	46	503	1254.90420158439	259.734753801126	680.356892595291	51.6929099276444	0.69206621791251	NA
5813048319	174	444	444	1088	Traced	LHAV2b1_R	352169483	TRUE	right	LHAV2b1	LHAV2b1	LHON	AVL07	unknown	unknown	NA	NA	4.07407407407407	4	1063	0	123	319	1501.51408768365	339.330223222842	637.558861200827	70.0081259194498	0.566346947608676	NA
1006142645	186	373	373	1230	Traced	LHAV2b1_R	347869916	TRUE	right	LHAV2b1	LHAV2b1	LHON	AVL07	unknown	unknown	NA	NA	3.93634496919918	4	1150	15	74	289	1336.08962045843	306.852918596438	599.532116338867	70.9794878239243	0.595212955915741	NA
1414046770	169	403	403	1262	Traced	LHAV2b1_R	308537059	TRUE	right	LHAV2b1	LHAV2b1	LHON	AVL07	unknown	unknown	NA	NA	3.8006230529595	4	1238	24	36	364	1168.52408430543	283.009930405786	561.039165294087	11.9808727669473	0.723163874480452	NA
919526332	154	103	103	976	Traced	LHAV2b10_R	286512258	TRUE	right	LHAV2b10	LHAV2b10	LHON	AVL07	unknown	unknown	NA	NA	3.69230769230769	4	554	368	54	40	1081.91838273372	225.126887395335	295.889862733358	217.042601337694	0.000392704562880208	NA
919845196	171	144	144	1040	Traced	LHAV2b10_R	350331050	TRUE	right	LHAV2b10	LHAV2b10	LHON	AVL07	unknown	unknown	NA	NA	3.68032786885246	4	815	193	68	70	1283.00939329478	351.635269877688	434.014862087764	145.016183782884	0.0698004531004107	NA
825359499	172	113	113	1137	Traced	LHAV2b10_R	275554255	TRUE	right	LHAV2b10	LHAV2b10	LHON	AVL07	unknown	unknown	NA	NA	3.54461538461538	4	511	574	23	77	1104.14467543203	255.470895168477	358.210387043282	127.895168252231	0.0333395385502064	NA
850972999	167	191	191	1190	Traced	LHAV2b10_R	306103456	TRUE	right	LHAV2b10	LHAV2b10	LHON	AVL07	unknown	unknown	NA	NA	3.45829042224511	4	706	393	44	138	1309.41189619222	310.822143884143	435.830327826671	150.865847113635	0.0990736491864057	NA
762961590	259	344	344	1760	Traced	LHAV2b11_R	541621679	TRUE	right	LHAV2b11	LHAV2b11	LHON	AVL07	unknown	unknown	NA	NA	3.38762886597938	3	1477	211	105	229	1924.33802385203	518.829741250783	709.24477158124	52.9712586264129	0.237618145018992	NA
851961337	463	1047	1047	3782	Traced	LHAV2b2_a_R	743135253	TRUE	right	LHAV2b2_a	LHAV2b2_a	LHON	AVL07	unknown	unknown	NA	NA	3.46432264736298	3	2476	1300	210	831	2348.21443745629	392.07765516901	1357.77030706339	59.5891790543351	0.140135578875457	NA
852302504	339	679	679	2797	Traced	LHAV2b2_a_R	560384569	TRUE	right	LHAV2b2_a	LHAV2b2_a	LHON	AVL07	unknown	unknown	NA	NA	3.41812564366632	3	1704	1060	161	513	1736.10412555153	302.464519953509	935.822741500756	71.1922354948367	0.0940042300055393	NA
5813016204	229	595	595	1896	Traced	LHAV2b2_b_R	421576960	TRUE	right	LHAV2b2_b	LHAV2b2_b	LHON	AVL07	unknown	unknown	NA	NA	3.45015416238438	4	1527	333	129	457	1406.39824684991	292.746002917898	697.890802634281	70.6581875160261	0.264218936567938	NA
1037510115	280	657	657	2115	Traced	LHAV2b2_b_R	472077375	TRUE	right	LHAV2b2_b	LHAV2b2_b	LHON	AVL07	unknown	unknown	NA	NA	3.58064516129032	4	1591	467	185	462	1474.85004990706	296.186160536314	738.23502784169	65.7107645417209	0.168515157513573	AV2b1 (Dolan et al. eLife 2019); V2 (Jeanne et al. Neuron 2018)
821612285	441	1028	1028	3629	Traced	LHAV2b2_c_R	666458509	TRUE	right	LHAV2b2_c	LHAV2b2_c	LHON	AVL07	unknown	unknown	NA	NA	3.25571725571726	3	2212	1417	98	926	3089.35538959404	644.306600683667	1811.18602574652	22.6408894944153	0.193441760060775	NA
730562993	312	624	624	2413	Traced	LHAV2b3_R	649144486	TRUE	right	LHAV2b3	LHAV2b3	LHON	AVL07	unknown	unknown	NA	NA	3.45530145530146	3	1923	490	159	462	2395.30672387733	694.672924786092	1136.43077802329	42.0219578298314	0.205821046487068	NA
852302293	322	742	742	2492	Traced	LHAV2b3_R	593820263	TRUE	right	LHAV2b3	LHAV2b3	LHON	AVL07	unknown	unknown	NA	NA	3.45061728395062	3	1981	504	200	541	2432.09568577951	698.118569350896	1190.59417934029	28.2025515865008	0.199282426888253	NA
819895218	369	662	662	2986	Traced	LHAV2b3_R	672047225	TRUE	right	LHAV2b3	LHAV2b3	LHON	AVL07	unknown	unknown	NA	NA	3.4942767950052	3	2431	555	219	440	2371.42952246322	755.435523831269	1054.19098037648	31.662978547758	0.164799733308392	NA
1101984860	160	433	433	1140	Traced	LHAV2b4_R	376242495	TRUE	right	LHAV2b4	LHAV2b4	LHON	AVL07	unknown	unknown	NA	NA	3.94558521560575	4	846	294	56	371	1278.32514827669	222.20176252401	707.761173114662	68.9537598782963	0.274007654794802	NA
886820993	168	317	317	1156	Traced	LHAV2b4_R	371314155	TRUE	right	LHAV2b4	LHAV2b4	LHON	AVL07	unknown	unknown	NA	NA	4.14727085478888	4	855	294	56	259	1229.36653537911	268.574765400598	593.367920638379	60.1173540951667	0.222597041789616	NA
947168406	189	452	452	1330	Traced	LHAV2b4_R	398455112	TRUE	right	LHAV2b4	LHAV2b4	LHON	AVL07	unknown	unknown	NA	NA	4.06900102986612	4	989	335	74	375	1432.90355089979	313.542570666888	710.970390470754	60.356776585004	0.242925411831399	NA
1039923193	161	448	448	1148	Traced	LHAV2b4_R	378820953	TRUE	right	LHAV2b4	LHAV2b4	LHON	AVL07	unknown	unknown	NA	NA	3.6625	4	902	170	48	389	1224.2231089556	195.513665331344	646.076199432491	106.395786947688	0.41255551797903	NA
1538181953	154	428	428	1043	Traced	LHAV2b4_R	345346137	TRUE	right	LHAV2b4	LHAV2b4	LHON	AVL07	unknown	unknown	NA	NA	3.98445595854922	4	778	210	64	357	1155.28170731067	192.205819245021	611.828896676433	104.750221805251	0.301535348058402	NA
977123707	113	314	314	882	Traced	LHAV2b5_a_R	292973815	TRUE	right	LHAV2b5_a	LHAV2b5_a	LHON	AVL07	unknown	unknown	NA	NA	3.55885363357216	3	795	57	70	232	1201.33492723235	222.234749333259	581.534043530592	102.234206618018	0.4172228900176	NA
1260582361	121	390	390	1084	Traced	LHAV2b5_a_R	263995765	TRUE	right	LHAV2b5_a	LHAV2b5_a	LHON	AVL07	unknown	unknown	NA	NA	3.43106995884774	3	1036	0	74	305	1100.90732454913	195.002240211864	558.005149520321	60.3750423234944	0.669360039222679	NA
5813056386	102	222	222	785	Traced	LHAV2b5_b_R	296658235	TRUE	right	LHAV2b5_b	LHAV2b5_b	LHON	AVL07	unknown	unknown	NA	NA	3.58666666666667	4	633	114	38	175	1171.49449203209	180.733858433821	580.879430902982	123.786806980012	0.331152991784052	NA
819943010	186	298	298	1579	Traced	LHAV2b6_R	381441431	TRUE	right	LHAV2b6	LHAV2b6	LHON	AVL07	unknown	unknown	NA	NA	3.38969072164948	4	1214	345	67	223	1530.77350324719	378.209144739545	640.068389817997	112.893393023968	0.198930257925158	NA
5813093028	191	330	330	1587	Traced	LHAV2b6_R	370259794	TRUE	right	LHAV2b6	LHAV2b6	LHON	AVL07	unknown	unknown	NA	NA	3.43163265306122	4	1253	247	55	265	1574.69257680243	425.504685721596	693.23373143435	105.405465075249	0.311485193377438	NA
1013296065	159	244	244	1377	Traced	LHAV2b6_R	327894696	TRUE	right	LHAV2b6	LHAV2b6	LHON	AVL07	unknown	unknown	NA	NA	3.8765306122449	4	1271	68	71	158	1315.0858312996	384.377760139665	479.409543734579	115.842344477671	0.361923721861633	NA
882003599	225	398	398	1646	Traced	LHAV2b7_a_R	445514562	TRUE	right	LHAV2b7_a	LHAV2b7_a	LHON	AVL07	unknown	unknown	NA	NA	3.55323590814196	4	947	694	79	312	1746.22124930699	438.259563912156	868.604639073637	95.2023851496077	0.0942034407463069	NA
850260732	184	276	276	1390	Traced	LHAV2b7_b_R	357746506	TRUE	right	LHAV2b7_b	LHAV2b7_b	LHON	AVL07	unknown	unknown	NA	NA	3.4153686396677	3	830	526	64	206	1388.15401118609	387.049843597607	648.849996075455	73.5928175959362	0.0897007821643906	NA
944047683	188	284	284	1453	Traced	LHAV2b7_b_R	373855497	TRUE	right	LHAV2b7_b	LHAV2b7_b	LHON	AVL07	unknown	unknown	NA	NA	3.40644490644491	3	971	437	62	217	1367.19101127257	332.178398975215	590.095846420081	117.428558276263	0.140765935864913	NA
944729222	158	413	413	1137	Traced	LHAV2b8_R	361341389	TRUE	right	LHAV2b8	LHAV2b8	LHON	AVL07	unknown	unknown	NA	NA	3.82316442605998	4	1135	2	146	262	1573.64055156907	506.91595022838	594.961935020342	58.7759149725566	0.477311477078295	NA
881999404	249	340	340	1615	Traced	LHAV2b9_R	449985845	TRUE	right	LHAV2b9	LHAV2b9	LHON	AVL07	unknown	unknown	NA	NA	3.328173374613	3	1162	449	61	278	1824.67898639472	500.03480721012	817.546405379643	53.2086594081492	0.194066267608771	NA
912667199	229	244	244	1539	Traced	LHAV2b9_R	380107557	TRUE	right	LHAV2b9	LHAV2b9	LHON	AVL07	unknown	unknown	NA	NA	3.27235354573484	3	1295	239	70	171	1634.36407667496	534.80875213593	555.170647526211	89.5089830152737	0.213363915530008	NA
5812980824	322	354	354	2606	Traced	LHAV2c1_R	603827943	TRUE	right	LHAV2c1	LHAV2c1	LHON	AVL07	unknown	unknown	NA	NA	3.76954732510288	4	2001	479	152	184	1687.92427361702	480.226524192175	649.913124467954	241.137826616354	0.0859160546551643	NA
454693209	170	323	323	1141	Traced	LHAV2c1_R	395849255	TRUE	right	LHAV2c1	LHAV2c1	LHON	AVL07	unknown	unknown	NA	NA	3.39130434782609	4	780	309	57	247	1485.50758667939	280.208775979139	726.710017944445	233.022730317294	0.192611258064379	NA
5813015004	155	308	308	1091	Traced	LHAV2c1_R	420414541	TRUE	right	LHAV2c1	LHAV2c1	LHON	AVL07	unknown	unknown	NA	NA	3.37151702786378	4	836	248	75	219	1557.80151754186	372.345500723062	679.158758162615	197.639211236247	0.185361167823749	NA
881620582	145	282	282	1058	Traced	LHAV2c1_R	389546337	TRUE	right	LHAV2c1	LHAV2c1	LHON	AVL07	unknown	unknown	NA	NA	3.31879543094496	4	664	341	39	228	1462.09690671398	236.223050816804	714.675924444473	217.525322466582	0.183311051186066	NA
455033548	284	367	367	2456	Traced	LHAV2c1_R	551393684	TRUE	right	LHAV2c1	LHAV2c1	LHON	AVL07	unknown	unknown	NA	NA	3.62448559670782	4	1962	428	136	214	1639.81947410268	418.04643740522	628.407653205358	211.073035317711	0.12858380733241	NA
422971316	120	164	164	739	Traced	LHAV2c1_R	337362498	TRUE	right	LHAV2c1	LHAV2c1	LHON	AVL07	unknown	unknown	NA	NA	3.67879417879418	4	478	253	36	113	1206.50474728127	209.434623489417	496.71309401782	255.713493218569	0.108896833984965	NA
456082779	141	227	227	899	Traced	LHAV2c1_R	374780828	TRUE	right	LHAV2c1	LHAV2c1	LHON	AVL07	unknown	unknown	NA	NA	3.425	4	628	242	42	166	1363.4728661978	240.523314872785	618.480415854579	237.903344370777	0.181692705192213	NA
5813048297	165	281	281	1091	Traced	LHAV2c1_R	378272275	TRUE	right	LHAV2c1	LHAV2c1	LHON	AVL07	unknown	unknown	NA	NA	3.64828303850156	4	625	436	78	194	1291.32201604329	221.677189480306	527.046017666013	229.455099296205	0.0600034501430801	NA
5813087655	139	175	175	1089	Traced	LHAV2c1_R	332642246	TRUE	right	LHAV2c1	LHAV2c1	LHON	AVL07	unknown	unknown	NA	NA	4.0460593654043	4	1005	67	104	55	997.639708739112	327.205060286426	243.151272842492	198.834017309017	0.0941442504927447	NA
518476551	252	439	439	2024	Traced	LHAV2c1_R	547675857	TRUE	right	LHAV2c1	LHAV2c1	LHON	AVL07	unknown	unknown	NA	NA	3.63319672131148	4	1179	821	130	286	1791.75873979757	317.800088561731	800.430970099886	255.217381157809	0.0484227164557529	NA
947795335	210	309	309	1649	Traced	LHAV2c1_R	456800368	TRUE	right	LHAV2c1	LHAV2c1	LHON	AVL07	unknown	unknown	NA	NA	3.55909558067831	4	982	640	116	168	1371.53011273927	266.53567796959	480.933006895742	265.049244574365	0.0236386778045813	NA
5813047212	270	357	357	2132	Traced	LHAV2c1_R	529385716	TRUE	right	LHAV2c1	LHAV2c1	LHON	AVL07	unknown	unknown	NA	NA	3.60515463917526	4	1211	859	72	274	1755.67095603737	299.143982350222	858.368943496725	187.265817368708	0.0889715078759135	NA
580547055	232	318	318	1628	Traced	LHAV2c1_R	424144622	TRUE	right	LHAV2c1	LHAV2c1	LHON	AVL07	unknown	unknown	NA	NA	3.64012409513961	4	924	625	94	208	1553.21901699075	272.52608143725	640.493316542396	205.829890460992	0.0508088006560149	NA
975750913	155	282	282	1015	Traced	LHAV2c2_R	329913438	TRUE	right	LHAV2c2	LHAV2c2	LHON	AVL07	unknown	unknown	NA	NA	4.61782786885246	5	537	469	59	213	1257.70808181461	202.565328388673	536.298984131455	233.989424815253	0.069062669756809	NA
574377562	1276	1786	1786	10820	Traced	LHAV2d1_R	1834924320	TRUE	right	LHAV2d1	LHAV2d1	LHON	ADL24	unknown	unknown	NA	NA	4.01447776628749	4	7583	3173	865	901	5409.60385394504	1999.45049038432	2046.85020978857	43.657932550331	0.0297096827422385	NA
575042709	253	299	299	1885	Traced	LHAV2e1_R	437774458	TRUE	right	LHAV2e1	LHAV2e1	LHON	ADL04	acetylcholine	unknown	NA	NA	3.628125	4	1462	370	97	184	1609.90516994948	369.650023852458	611.11993777715	103.126951467932	0.136279867045153	NA
609168709	251	429	429	2023	Traced	LHAV2e2_R	395125476	TRUE	right	LHAV2e2	LHAV2e2	LHON	ADL04	acetylcholine	unknown	NA	NA	3.90358974358974	4	1621	324	200	219	1680.06006060241	459.61971536884	675.516787199	68.8239243135313	0.0977047170732374	NA
516771668	163	342	342	1315	Traced	LHAV2e3_R	330884188	TRUE	right	LHAV2e3	LHAV2e3	LHON	ADL04	acetylcholine	unknown	NA	NA	3.69484536082474	4	867	443	107	225	1435.85362257445	269.549631033931	657.859380098894	115.218005919694	0.0757575308313927	NA
577801333	126	229	229	945	Traced	LHAV2e3_R	300023199	TRUE	right	LHAV2e3	LHAV2e3	LHON	ADL04	acetylcholine	unknown	NA	NA	3.74311926605505	4	597	226	81	129	1264.23203310041	185.617679601925	521.634890407998	145.723491509793	0.0783984978545763	NA
576774002	212	575	575	1757	Traced	LHAV2e4_a_R	368007489	TRUE	right	LHAV2e4_a	LHAV2e4_a	LHON	ADL04	acetylcholine	unknown	NA	NA	3.99160545645331	4	1503	168	255	313	1558.83750792406	439.76533527171	665.934677486841	77.6992143209969	0.18058055677811	NA
485732870	160	253	253	1130	Traced	LHAV2e4_b_R	342250083	TRUE	right	LHAV2e4_b	LHAV2e4_b	LHON	ADL04	acetylcholine	unknown	NA	NA	3.40368852459016	3	837	227	107	136	1357.27565836497	320.689718792836	477.585538497623	129.576396900487	0.085944243434526	NA
422644053	120	154	154	1213	Traced	LHAV2f1_a_R	315226116	TRUE	right	LHAV2f1_a	LHAV2f1_a	LHON	ADL22	unknown	unknown	NA	NA	3.32135523613963	3	1008	198	38	115	1019.78067038387	276.01637497792	448.131339367158	46.005782248374	0.228170450238226	NA
423684795	101	280	280	1016	Traced	LHAV2f1_a_R	298825589	TRUE	right	LHAV2f1_a	LHAV2f1_a	LHON	ADL22	unknown	unknown	NA	NA	3.63589211618257	3	766	216	88	186	1283.01526475059	283.412037744825	624.388745252582	68.6774700342141	0.148794304633548	NA
517458316	104	366	366	1039	Traced	LHAV2f1_a_R	266604893	TRUE	right	LHAV2f1_a	LHAV2f1_a	LHON	ADL22	unknown	unknown	NA	NA	3.67705088265836	3	809	219	145	217	1242.05090597458	348.8593215038	515.381114646947	41.1990377579066	0.110920312454223	NA
485736803	72	85	85	813	Traced	LHAV2f1_a_R	213080486	TRUE	right	LHAV2f1_a	LHAV2f1_a	LHON	ADL22	unknown	unknown	NA	NA	3.29644670050761	3	735	64	40	42	757.964722705217	261.058560871384	208.389144161102	58.5321683366306	0.161583015620007	NA
483354202	110	206	206	876	Traced	LHAV2f1_a_R	280655834	TRUE	right	LHAV2f1_a	LHAV2f1_a	LHON	ADL22	unknown	unknown	NA	NA	3.48765432098765	3	661	215	72	130	1232.26034483156	293.561534674449	572.245209220446	52.5586889370833	0.107805293493135	NA
517117602	79	81	81	816	Traced	LHAV2f1_a_R	214446936	TRUE	right	LHAV2f1_a	LHAV2f1_a	LHON	ADL22	unknown	unknown	NA	NA	3.31663326653307	3	728	72	27	52	736.094690646393	211.337741877091	232.018434550714	51.7599322041657	0.244285146024997	NA
422666053	121	403	403	1230	Traced	LHAV2f1_b_R	325571576	TRUE	right	LHAV2f1_b	LHAV2f1_b	LHON	ADL22	unknown	unknown	NA	NA	3.88078108941418	4	1033	26	131	251	1418.23485817301	301.725382773501	703.260391971144	92.7515162026647	0.40511845381322	AV2a2 (Dolan et al. eLife 2019)
452331917	121	349	349	1405	Traced	LHAV2f1_b_R	289547203	TRUE	right	LHAV2f1_b	LHAV2f1_b	LHON	ADL22	unknown	unknown	NA	NA	4.1640866873065	4	1241	114	155	180	1155.65344169181	327.689504117806	460.433165933312	74.9564569262277	0.188296580682256	NA
483038957	128	376	376	1292	Traced	LHAV2f1_b_R	348297860	TRUE	right	LHAV2f1_b	LHAV2f1_b	LHON	ADL22	unknown	unknown	NA	NA	3.74043433298862	4	1171	31	109	247	1353.9128147734	302.741833186883	632.676414027776	93.802401324818	0.438800091397791	AV2a2 (Dolan et al. eLife 2019); L6 (Jeanne et al. Neuron 2018)
604735525	159	379	379	1501	Traced	LHAV2f2_a_R	428255985	TRUE	right	LHAV2f2_a	LHAV2f2_a	LHON	ADL22	unknown	unknown	NA	NA	3.66004184100418	4	1430	71	263	109	1718.35778522594	924.091124008779	357.584857731421	28.1153973932064	0.0875674437232266	AV2a2 (Dolan et al. eLife 2019)
574710121	190	475	475	1750	Traced	LHAV2f2_b_R	479491317	TRUE	right	LHAV2f2_b	LHAV2f2_b	LHON	ADL22	unknown	unknown	NA	NA	3.66425619834711	4	876	750	181	285	1962.95917808865	565.184988279996	867.989269108792	33.4113740306801	0.0148481895362053	NA
573346324	184	613	613	1539	Traced	LHAV2f2_b_R	486508601	TRUE	right	LHAV2f2_b	LHAV2f2_b	LHON	ADL22	unknown	unknown	NA	NA	3.94479166666667	4	802	735	91	517	2068.08199330539	257.928885964837	1302.49361917679	15.0428745934762	0.106388123739196	AV2a2 (Dolan et al. eLife 2019)
484377189	156	213	213	1611	Traced	LHAV2f3_R	317360564	TRUE	right	LHAV2f3	LHAV2f3	LHON	ADL22	unknown	unknown	NA	NA	3.46209016393443	3	1395	209	37	174	1284.68631632862	335.3015067895	564.034970172788	42.9147306189449	0.332115088780936	NA
513357277	214	360	360	1985	Traced	LHAV2f3_R	387773455	TRUE	right	LHAV2f3	LHAV2f3	LHON	ADL22	unknown	unknown	NA	NA	3.40993788819876	3	1739	172	116	239	1753.57479891295	533.747674849383	630.507460821305	57.8968161570886	0.274902164750863	NA
578841489	193	302	302	1752	Traced	LHAV2f3_R	374909932	TRUE	right	LHAV2f3	LHAV2f3	LHON	ADL22	unknown	unknown	NA	NA	3.32098765432099	3	1463	289	80	213	1483.56444868332	446.953526836995	556.63907986708	49.3536821444485	0.218265583211449	NA
578151363	213	373	373	1985	Traced	LHAV2f4_R	426762608	TRUE	right	LHAV2f4	LHAV2f4	LHON	ADL22	unknown	unknown	NA	NA	3.33126293995859	3	1895	73	153	215	1844.90031459267	602.66600109265	622.950796045417	49.7422046003969	0.305048272834846	NA
574382779	140	427	427	938	Traced	LHAV2g1_R	464094891	TRUE	right	LHAV2g1	LHAV2g1	LHON	AVL07	unknown	unknown	NA	NA	3.58564102564103	4	538	347	18	399	1774.1932207754	174.586261736161	1106.56888422186	139.092691456669	0.27157473505743	NA
759585675	155	461	461	1049	Traced	LHAV2g1_R	464859321	TRUE	right	LHAV2g1	LHAV2g1	LHON	AVL07	unknown	unknown	NA	NA	3.85655314757482	4	616	417	30	417	1725.95076135398	250.939585409749	931.626211080747	130.463701541322	0.228479941875212	NA
881995193	106	279	279	785	Traced	LHAV2g2_a_R	362822589	TRUE	right	LHAV2g2_a	LHAV2g2_a	LHON	AVL07	unknown	unknown	NA	NA	4.23794871794872	4	752	12	92	180	1357.04642205901	349.302178306984	528.417426874402	85.8142983076202	0.437342277026511	NA
1259218128	164	254	254	1267	Traced	LHAV2g2_a_R	409196880	TRUE	right	LHAV2g2_a	LHAV2g2_a	LHON	AVL07	unknown	unknown	NA	NA	3.83009211873081	4	1235	4	97	152	1348.83153539583	404.409576891554	572.322812781764	77.8386226241277	0.455249866480024	NA
978177557	120	268	268	891	Traced	LHAV2g2_a_R	340546484	TRUE	right	LHAV2g2_a	LHAV2g2_a	LHON	AVL07	unknown	unknown	NA	NA	4.07747933884298	4	877	14	93	173	1349.31875075821	381.698574347938	514.79602722862	90.2492811644911	0.428992817081715	NA
5813041458	185	515	515	1357	Traced	LHAV2g2_b_R	472481178	TRUE	right	LHAV2g2_b	LHAV2g2_b	LHON	AVL07	unknown	unknown	NA	NA	3.72298006295908	4	952	249	82	407	1798.78099633941	427.313741825497	843.224616842402	65.2778788901239	0.289849415796088	NA
944423023	124	335	335	968	Traced	LHAV2g2_b_R	372190176	TRUE	right	LHAV2g2_b	LHAV2g2_b	LHON	AVL07	unknown	unknown	NA	NA	3.84090909090909	4	895	39	74	256	1455.19493094795	412.497453512091	542.173161782494	94.2362823264877	0.481020746223332	NA
574378463	129	239	239	866	Traced	LHAV2g3_R	429090692	TRUE	right	LHAV2g3	LHAV2g3	LHON	AVL07	unknown	unknown	NA	NA	3.47046632124352	3	437	380	41	191	1587.75317586233	206.105665455383	715.738438296297	172.025860166074	0.0910569812414813	NA
668497214	169	293	293	1197	Traced	LHAV2g3_R	453995708	TRUE	right	LHAV2g3	LHAV2g3	LHON	AVL07	unknown	unknown	NA	NA	3.42484342379958	3	703	474	43	239	1624.49040815739	252.432494331094	794.606940499791	153.053586323493	0.135563046377706	NA
667827599	151	343	343	1058	Traced	LHAV2g3_R	466432055	TRUE	right	LHAV2g3	LHAV2g3	LHON	AVL07	unknown	unknown	NA	NA	3.41538461538462	3	568	440	56	274	1791.54133883464	293.13329570347	866.370989269534	176.402903507231	0.11181737627741	NA
1199181443	75	234	234	612	Traced	LHAV2g4_R	277388678	TRUE	right	LHAV2g4	LHAV2g4	LHON	AVL07	unknown	unknown	NA	NA	3.71875	4	494	65	36	190	1254.75480633619	190.418600903958	621.885547725478	113.566832324952	0.413590542678832	NA
944720631	213	600	600	1401	Traced	LHAV2g5_R	568080145	TRUE	right	LHAV2g5	LHAV2g5	LHON	AVL07	unknown	unknown	NA	NA	3.6545643153527	4	1159	216	83	512	2042.38236303905	388.943821955477	1070.40958630871	114.571490071392	0.380672469802484	NA
945058110	213	517	517	1370	Traced	LHAV2g6_R	542256187	TRUE	right	LHAV2g6	LHAV2g6	LHON	AVL07	unknown	unknown	NA	NA	4.21212121212121	4	1171	194	71	441	1879.35918914598	291.363252730724	902.885904474326	86.7288656164196	0.39728730683377	NA
574352231	136	163	163	1021	Traced	LHAV2h1_a_R	290083953	TRUE	right	LHAV2h1_a	LHAV2h1_a	LHON	ADL04	acetylcholine	unknown	NA	NA	3.37997957099081	3	906	83	75	83	1131.51741308491	328.276682609728	392.929054811706	68.4594153184213	0.173634601474935	NA
761239957	122	124	124	902	Traced	LHAV2h1_a_R	264424611	TRUE	right	LHAV2h1_a	LHAV2h1_a	LHON	ADL04	acetylcholine	unknown	NA	NA	3.244126659857	3	775	85	46	75	1033.54420352156	255.842041258031	389.759673784621	75.8926900805322	0.214479134513668	NA
542665187	151	207	207	1323	Traced	LHAV2h1_b_R	387695638	TRUE	right	LHAV2h1_b	LHAV2h1_b	LHON	ADL04	acetylcholine	unknown	NA	NA	3.5015479876161	3	1231	62	106	100	1189.20198561735	333.210235352808	401.017186205107	89.3845100874811	0.20306145106914	NA
606431658	140	133	133	961	Traced	LHAV2h1_b_R	273155783	TRUE	right	LHAV2h1_b	LHAV2h1_b	LHON	ADL04	acetylcholine	unknown	NA	NA	3.31481481481481	3	819	105	54	74	1028.08806157324	284.14240999397	408.017573162903	70.5421311624674	0.168290360997247	NA
574378565	136	114	114	999	Traced	LHAV2h1_b_R	276870916	TRUE	right	LHAV2h1_b	LHAV2h1_b	LHON	ADL04	acetylcholine	unknown	NA	NA	3.20557851239669	3	915	43	44	68	1004.73949531427	284.485075666829	350.729726027231	69.0860138476236	0.295590704708409	NA
511970945	209	208	208	1592	Traced	LHAV2i1_R	439059724	TRUE	right	LHAV2i1	LHAV2i1	LHLN	ADL04	acetylcholine	unknown	NA	NA	3.21457489878543	3	1099	378	98	100	1405.72244895484	293.976731828978	451.676701390639	138.448219166287	0.0399280864534667	NA
603007915	210	192	192	1843	Traced	LHAV2i1_R	404236356	TRUE	right	LHAV2i1	LHAV2i1	LHLN	ADL04	acetylcholine	unknown	NA	NA	3.35149023638232	3	1008	806	58	125	1420.01231231052	206.058379379984	702.392520266987	102.227281177716	0.0314837283678769	NA
5813011770	187	235	235	1505	Traced	LHAV2i1_R	384561843	TRUE	right	LHAV2i1	LHAV2i1	LHLN	ADL04	acetylcholine	unknown	NA	NA	3.60932642487047	3	1369	71	131	94	1375.81627310074	378.148614731418	407.132701844251	80.6887302937538	0.154911048401367	NA
543770627	161	283	283	1188	Traced	LHAV2i2_R	322157653	TRUE	right	LHAV2i2	LHAV2i2	LHON	ADL04	acetylcholine	unknown	NA	NA	3.52268041237113	3	848	194	130	142	1352.95682432206	294.306904311578	503.462189962958	134.495800546543	0.0864661430190046	NA
574128034	152	317	317	1166	Traced	LHAV2i2_R	335949513	TRUE	right	LHAV2i2	LHAV2i2	LHON	ADL04	acetylcholine	unknown	NA	NA	3.32310838445808	3	766	207	112	183	1565.65951288695	248.16936331167	723.232805477303	150.358308432474	0.120802545289855	NA
850636610	138	253	253	1010	Traced	LHAV2i2_R	288104657	TRUE	right	LHAV2i2	LHAV2i2	LHON	ADL04	acetylcholine	unknown	NA	NA	3.09201213346815	3	775	235	79	161	1304.47869907408	249.879918578233	614.546715367142	60.3875935316348	0.131782520684535	AV2a1 (Dolan et al. eLife 2019)
607130326	170	256	256	1246	Traced	LHAV2i3_R	348854810	TRUE	right	LHAV2i3	LHAV2i3	LHON	ADL04	acetylcholine	unknown	NA	NA	3.44866529774127	3	867	219	128	116	1486.08173665751	528.373661728783	492.899575407234	133.883743520752	0.0566105288079649	NA
450933288	175	137	137	1406	Traced	LHAV2i4_R	314511985	TRUE	right	LHAV2i4	LHAV2i4	LHON	ADL04	acetylcholine	unknown	NA	NA	4.0010298661174	4	950	158	60	48	1037.54727913685	255.219725303662	258.858122337015	227.699878103258	0.0689244072163658	NA
419880359	205	142	142	1898	Traced	LHAV2i4_R	340165354	TRUE	right	LHAV2i4	LHAV2i4	LHON	ADL04	acetylcholine	unknown	NA	NA	3.93711967545639	4	1607	33	81	36	1142.16283686601	329.910488097367	284.151069289871	134.114652136912	0.133069504023643	NA
450933392	196	142	142	1477	Traced	LHAV2i4_R	335512156	TRUE	right	LHAV2i4	LHAV2i4	LHON	ADL04	acetylcholine	unknown	NA	NA	3.70328542094456	4	932	461	47	85	1045.70722959183	219.943021517619	427.520242753547	117.837098285891	0.0544196145117868	NA
450951445	189	279	279	1241	Traced	LHAV2i5_R	448785279	TRUE	right	LHAV2i5	LHAV2i5	LHON	ADL04	acetylcholine	unknown	NA	NA	3.60725388601036	4	1075	131	96	177	1512.43048479196	429.713257382893	626.593778867415	115.462843760947	0.23361506700097	NA
481989534	192	154	154	1381	Traced	LHAV2i5_R	420030600	TRUE	right	LHAV2i5	LHAV2i5	LHON	ADL04	acetylcholine	unknown	NA	NA	4.26028806584362	4	1169	88	90	54	1232.98922164331	387.340968789101	394.297900451007	113.286825844048	0.0980418727926874	NA
733005935	221	266	266	1723	Traced	LHAV2j1_R	378680587	TRUE	right	LHAV2j1	LHAV2j1	LHON	ADL04	acetylcholine	unknown	NA	NA	3.74425887265136	4	1380	339	42	219	1346.2893851027	285.516686959374	612.350640244642	75.8350038550109	0.270495712057038	NA
5813040903	166	215	215	1269	Traced	LHAV2k1_R	349280903	TRUE	right	LHAV2k1	LHAV2k1	LHON	ADL04	acetylcholine	unknown	NA	NA	3.75413223140496	4	1137	92	80	122	1100.86220684997	290.467243514139	417.233402535507	84.2986763895595	0.242406919704095	NA
5813069285	172	196	196	1228	Traced	LHAV2k1_R	358489379	TRUE	right	LHAV2k1	LHAV2k1	LHON	ADL04	acetylcholine	unknown	NA	NA	3.68820512820513	4	1038	143	49	138	1235.77767786138	280.693941373979	536.992943688008	89.5929019338109	0.277147365634365	L6 (Jeanne et al. Neuron 2018)
5813012462	194	228	228	1541	Traced	LHAV2k1_R	386933443	TRUE	right	LHAV2k1	LHAV2k1	LHON	ADL04	acetylcholine	unknown	NA	NA	3.83212435233161	4	1151	296	77	148	1324.79091176679	342.046313156523	551.977915895293	64.696851112373	0.136315585315759	NA
455728985	143	237	237	1034	Traced	LHAV2k10_a_R	282253156	TRUE	right	LHAV2k10_a	LHAV2k10_a	LHON	ADL04	acetylcholine	unknown	NA	NA	3.43254376930999	3	778	207	83	141	1215.49786533788	312.018475293256	521.39660815326	104.651438319929	0.123447665066462	NA
390586997	114	122	122	793	Traced	LHAV2k10_b_R	206761755	TRUE	right	LHAV2k10_b	LHAV2k10_b	LHON	ADL04	acetylcholine	unknown	NA	NA	3.71618852459016	4	557	194	58	54	946.551871744634	273.001533693604	295.825743290169	103.418798385831	0.0330435597346667	NA
5813106089	132	207	207	980	Traced	LHAV2k10_b_R	237382592	TRUE	right	LHAV2k10_b	LHAV2k10_b	LHON	ADL04	acetylcholine	unknown	NA	NA	3.63534218590398	4	538	406	73	121	1120.07910860741	280.6613227327	417.85446107573	125.00094223571	0.0233932535207729	NA
547115923	261	219	219	2090	Traced	LHAV2k11_a_R	345090921	TRUE	right	LHAV2k11_a	LHAV2k11_a	LHON	ADL04	acetylcholine	unknown	NA	NA	3.97626418988648	4	1738	296	114	94	1226.15019026229	386.604309575676	389.378162736967	67.001827733428	0.0707015516390694	NA
640915837	321	278	278	2606	Traced	LHAV2k11_a_R	421731854	TRUE	right	LHAV2k11_a	LHAV2k11_a	LHON	ADL04	acetylcholine	unknown	NA	NA	3.58624229979466	4	1881	652	99	175	1463.08565958879	321.576460636771	647.52894836644	52.6801772320538	0.0867096065725065	NA
514406435	374	419	419	2979	Traced	LHAV2k11_b_R	442569661	TRUE	right	LHAV2k11_b	LHAV2k11_b	LHON	ADL04	acetylcholine	unknown	NA	NA	3.85077720207254	4	1956	899	119	289	1774.37612445205	362.938721953805	932.873386320002	67.9699500871646	0.0933850822176502	NA
606492411	216	271	271	1734	Traced	LHAV2k12_a_R	400566458	TRUE	right	LHAV2k12_a	LHAV2k12_a	LHON	ADL04	acetylcholine	unknown	NA	NA	3.86742034943474	4	1278	455	57	209	1383.10647345586	291.66821944764	664.070854491432	74.2827017401316	0.172022784442379	NA
667841133	210	251	251	1772	Traced	LHAV2k12_a_R	354545153	TRUE	right	LHAV2k12_a	LHAV2k12_a	LHON	ADL04	acetylcholine	unknown	NA	NA	3.57830092118731	4	1419	326	75	171	1235.09121880588	278.807900151294	531.978223137583	70.4510657221823	0.170784464313131	NA
699212545	205	219	219	1801	Traced	LHAV2k12_b_R	342480275	TRUE	right	LHAV2k12_b	LHAV2k12_b	LHON	ADL04	acetylcholine	unknown	NA	NA	3.5496417604913	4	1385	390	49	154	1268.46682872452	274.1704029067	507.325806177737	78.0958137328891	0.178229462612251	L3 (Jeanne et al. Neuron 2018)
636792984	316	784	784	2562	Traced	LHAV2k13_R	402986426	TRUE	right	LHAV2k13	LHAV2k13	LHON	ADL04	acetylcholine	unknown	NA	NA	3.72907949790795	4	1570	952	117	656	2321.17051067142	320.499516623703	1444.01689376923	57.190307391048	0.157535804313501	NA
549521047	221	597	597	1638	Traced	LHAV2k2_R	334838974	TRUE	right	LHAV2k2	LHAV2k2	LHON	ADL04	acetylcholine	unknown	NA	NA	3.59278350515464	4	1129	491	180	412	1811.8167495585	463.959055876319	859.404854370015	71.7085222185518	0.107654465566179	NA
5813061564	241	691	691	1885	Traced	LHAV2k2_R	342099836	TRUE	right	LHAV2k2	LHAV2k2	LHON	ADL04	acetylcholine	unknown	NA	NA	3.69287211740042	4	1349	496	147	538	2109.43034136603	367.925606015065	1119.08722091545	84.6176774797859	0.190238961603158	AV2a4 (Dolan et al. eLife 2019)
574723544	304	1052	1052	2397	Traced	LHAV2k2_R	454372436	TRUE	right	LHAV2k2	LHAV2k2	LHON	ADL04	acetylcholine	unknown	NA	NA	3.68200836820084	4	1515	861	340	701	3031.72747020183	786.360583637972	1531.51275912328	81.1634441990164	0.0678446575871733	NA
5813013203	216	466	466	1854	Traced	LHAV2k2_R	247581104	TRUE	right	LHAV2k2	LHAV2k2	LHON	ADL04	acetylcholine	unknown	NA	NA	3.67295597484277	4	1133	641	80	381	1926.23760716703	233.06223721049	1015.16059759198	65.5235525184145	0.147485455206259	NA
360595711	174	322	322	1238	Traced	LHAV2k3_R	409845754	TRUE	right	LHAV2k3	LHAV2k3	LHON	ADL04	acetylcholine	unknown	NA	NA	3.35751295336788	3	1031	163	85	224	1526.36541005157	339.885161638966	743.238886599521	105.960815814064	0.261448944648893	AV5a1 (Dolan et al. eLife 2019)
5813039980	182	488	488	1415	Traced	LHAV2k3_R	361739458	TRUE	right	LHAV2k3	LHAV2k3	LHON	ADL04	acetylcholine	unknown	NA	NA	3.38149688149688	3	1036	379	147	324	1654.28155687617	377.217880350183	790.509730319741	80.239641642016	0.123462643816766	AV2a3 (Dolan et al. eLife 2019)
5812980329	305	305	305	2569	Traced	LHAV2k4_R	493578467	TRUE	right	LHAV2k4	LHAV2k4	LHON	ADL04	acetylcholine	unknown	NA	NA	3.98229166666667	4	2276	173	143	150	1611.41222497454	418.201544045269	609.417998848799	117.733736880894	0.177886282072367	NA
329206270	181	204	204	1450	Traced	LHAV2k4_R	344010041	TRUE	right	LHAV2k4	LHAV2k4	LHON	ADL04	acetylcholine	unknown	NA	NA	3.61330561330561	4	1113	242	80	114	1207.04789778634	302.293477208931	428.793261423276	91.2681292698442	0.115836924640235	NA
360237353	170	193	193	1318	Traced	LHAV2k4_R	337468055	TRUE	right	LHAV2k4	LHAV2k4	LHON	ADL04	acetylcholine	unknown	NA	NA	4.01966873706004	4	948	341	85	94	1174.1401869154	246.47643654438	432.432532885322	112.913669993669	0.0432650185418916	NA
359560118	220	275	275	1642	Traced	LHAV2k4_R	417591592	TRUE	right	LHAV2k4	LHAV2k4	LHON	ADL04	acetylcholine	unknown	NA	NA	3.92110655737705	4	1308	317	119	139	1401.25728961156	401.704485715752	512.835104589363	97.7992946009195	0.0829039608620858	NA
391945237	213	329	329	1564	Traced	LHAV2k4_R	425267390	TRUE	right	LHAV2k4	LHAV2k4	LHON	ADL04	acetylcholine	unknown	NA	NA	3.69907881269191	4	1212	299	142	179	1469.44899747134	396.384561202727	592.577909386611	85.3082736404175	0.0936048272433097	NA
5812980039	204	308	308	1518	Traced	LHAV2k4_R	478240604	TRUE	right	LHAV2k4	LHAV2k4	LHON	ADL04	acetylcholine	unknown	NA	NA	3.99793601651187	4	1394	124	132	168	1423.21224133392	451.707165227484	550.889689239228	92.1540045971993	0.203863024943427	NA
452327439	184	303	303	1341	Traced	LHAV2k4_R	474888294	TRUE	right	LHAV2k4	LHAV2k4	LHON	ADL04	acetylcholine	unknown	NA	NA	3.75231243576567	4	1247	94	124	173	1501.60671771309	449.205467053535	592.225179525314	82.6684071443712	0.239890362230564	NA
454377810	137	188	188	975	Traced	LHAV2k4_R	383058544	TRUE	right	LHAV2k4	LHAV2k4	LHON	ADL04	acetylcholine	unknown	NA	NA	3.57656731757451	4	924	51	88	94	1177.23112188858	407.394310006302	365.542319650667	97.4397320475493	0.219416975629918	NA
485723857	187	327	327	1618	Traced	LHAV2k5_R	276137365	TRUE	right	LHAV2k5	LHAV2k5	LHON	ADL04	acetylcholine	unknown	NA	NA	3.33713692946058	3	918	649	173	142	1301.41614704368	509.618975946943	397.517971857231	108.453858818506	0.000845330322696736	NA
486073599	162	247	247	1382	Traced	LHAV2k5_R	244995333	TRUE	right	LHAV2k5	LHAV2k5	LHON	ADL04	acetylcholine	unknown	NA	NA	3.37934560327198	3	999	340	151	78	1173.80503000172	549.331448423709	233.101912066574	109.078637705633	0.0055256965598337	NA
516762858	160	167	167	1297	Traced	LHAV2k5_R	250914447	TRUE	right	LHAV2k5	LHAV2k5	LHON	ADL04	acetylcholine	unknown	NA	NA	3.44195519348269	3	747	536	65	89	1143.74099220509	287.480454582145	439.747460160256	127.73477842639	0.0145190752766411	NA
546123239	469	488	488	4350	Traced	LHAV2k6_R	688578265	TRUE	right	LHAV2k6	LHAV2k6	LHON	ADL04	acetylcholine	unknown	NA	NA	3.859375	4	3444	780	111	364	2227.66444471339	345.749864658844	1061.44753691754	89.2374812071515	0.213901496995929	NA
391276906	144	238	238	1068	Traced	LHAV2k7_R	291945271	TRUE	right	LHAV2k7	LHAV2k7	LHON	ADL04	acetylcholine	unknown	NA	NA	3.29568788501027	3	788	243	70	161	1115.95697171343	248.727219806972	466.952960796217	91.6328379699679	0.144068277683126	NA
606479285	141	145	145	998	Traced	LHAV2k7_R	293832871	TRUE	right	LHAV2k7	LHAV2k7	LHON	ADL04	acetylcholine	unknown	NA	NA	3.59100204498978	3	828	145	57	80	963.971809912654	244.096597460984	330.301100806659	68.0781386872092	0.13721067371749	NA
638196102	966	1534	1534	8211	Traced	LHAV2k8_R	1081669558	TRUE	right	LHAV2k8	LHAV2k8	LHON	ADL04	acetylcholine	unknown	NA	NA	3.81584362139918	4	5812	2365	385	1127	4083.70632584021	842.654382199329	2039.69196372083	123.624651413534	0.132811286578456	NA
855043038	263	405	405	2346	Traced	LHAV2k9_R	365730575	TRUE	right	LHAV2k9	LHAV2k9	LHON	ADL04	acetylcholine	unknown	NA	NA	3.35348360655738	3	1097	1083	145	246	1575.63294428059	478.496414581586	629.342903201266	134.174601573999	0.0107356636486643	NA
424384254	234	534	534	2262	Traced	LHAV2k9_R	335987218	TRUE	right	LHAV2k9	LHAV2k9	LHON	ADL04	acetylcholine	unknown	NA	NA	3.48916408668731	3	2030	93	461	57	1597.49935036342	1002.04546476493	102.557300746758	112.491111574908	0.0111120825889472	NA
5813039931	225	557	557	1909	Traced	LHAV2k9_R	376120564	TRUE	right	LHAV2k9	LHAV2k9	LHON	ADL04	acetylcholine	unknown	NA	NA	3.45841995841996	3	1471	406	305	214	1693.87718772036	723.863606121478	434.143901928327	91.1149478504453	0.0304023396592201	NA
1130947782	90	247	247	678	Traced	LHAV2l1_R	292515352	TRUE	right	LHAV2l1	LHAV2l1	LHON	AVL07	unknown	unknown	NA	NA	4.20872274143302	4	646	12	105	130	1170.80735992003	253.427994050497	444.163403802012	115.982483739379	0.329658147262973	NA
5813105722	433	684	684	4120	Traced	LHAV2m1_R	753851534	TRUE	right	LHAV2m1	LHAV2m1	LHLN	ADL24	unknown	unknown	NA	NA	3.10091743119266	3	3228	845	352	323	2449.10669263025	868.436965917578	770.167231090067	39.663705354499	0.0525715942555536	Local5 (Jeanne et al. Neuron 2018)
696126258	415	607	607	3853	Traced	LHAV2m1_R	733797376	TRUE	right	LHAV2m1	LHAV2m1	LHLN	ADL24	unknown	unknown	NA	NA	3.08231707317073	3	2971	777	320	273	2337.85014938825	799.947546587069	668.919668059884	79.549898724478	0.0459610837366566	NA
481264051	513	690	690	4762	Traced	LHAV2n1_R	909111008	TRUE	right	LHAV2n1	LHAV2n1	LHLN	ADL24	unknown	unknown	NA	NA	3.37512953367876	3	3158	1458	355	322	3081.90441296774	1102.23505424657	907.355190440556	113.630717284948	0.0159754522297608	Local5 (Jeanne et al. Neuron 2018)
421650994	683	1672	1672	5281	Traced	LHAV2o1_R	975730887	TRUE	right	LHAV2o1	LHAV2o1	LHON	AVL07	unknown	unknown	NA	NA	4.76826722338205	5	4558	593	897	747	4405.45333951864	1566.07283489022	1490.79324888276	112.461378223774	0.106830203440368	NA
295798962	157	356	356	1317	Traced	LHAV3a1_a_R	380257672	TRUE	right	LHAV3a1_a	LHAV3a1_a	LHON	ADL10	gaba	unknown	NA	NA	3.78497942386831	4	1107	115	125	223	1509.7335662968	365.801890535474	521.464434048312	92.5378494706775	0.252079517739455	NA
480257896	143	246	246	1162	Traced	LHAV3a1_a_R	341002033	TRUE	right	LHAV3a1_a	LHAV3a1_a	LHON	ADL10	gaba	unknown	NA	NA	3.4969512195122	4	967	144	89	155	1323.54985298391	323.316307716952	491.989680960129	125.836705575861	0.198078997403324	NA
5813035078	141	240	240	1116	Traced	LHAV3a1_a_R	352370710	TRUE	right	LHAV3a1_a	LHAV3a1_a	LHON	ADL10	gaba	unknown	NA	NA	3.62525879917184	4	1013	71	76	116	1330.96213219748	325.931320952948	318.402788794557	82.5483629104731	0.260259234863664	NA
419929377	172	370	370	1293	Traced	LHAV3a1_a_R	356628941	TRUE	right	LHAV3a1_a	LHAV3a1_a	LHON	ADL10	gaba	unknown	NA	NA	3.68983402489627	4	1047	230	114	252	1567.62564788982	327.333601272157	591.574623940665	88.4628022455051	0.189390796602198	NA
480599285	96	168	168	774	Traced	LHAV3a1_b_R	309467321	TRUE	right	LHAV3a1_b	LHAV3a1_b	LHON	ADL10	gaba	unknown	NA	NA	3.61577868852459	4	734	18	69	94	1075.07409278748	269.805865479372	346.437459477579	87.1069325811717	0.336036661936982	NA
295461871	83	160	160	644	Traced	LHAV3a1_b_R	298710950	TRUE	right	LHAV3a1_b	LHAV3a1_b	LHON	ADL10	gaba	unknown	NA	NA	3.34984520123839	4	553	33	55	102	1047.24783070901	230.772080358361	351.91796484677	124.073435996181	0.322277562887073	NA
480258191	107	209	209	863	Traced	LHAV3a1_b_R	327058471	TRUE	right	LHAV3a1_b	LHAV3a1_b	LHON	ADL10	gaba	unknown	NA	NA	3.53597497393118	4	804	25	73	125	1145.85763204548	261.940053807861	383.272936810521	78.9355023875549	0.366538272892181	NA
296120593	643	1095	1095	4717	Traced	LHAV3a1_c_R	1216629749	TRUE	right	LHAV3a1_c	LHAV3a1_c	LHON	ADL10	gaba	unknown	NA	NA	3.58987603305785	4	2964	1727	227	859	3699.09671393126	815.618981002252	1934.47254801425	92.8905493824509	0.117949615887191	NA
325814669	110	207	207	831	Traced	LHAV3a2_R	301837893	TRUE	right	LHAV3a2	LHAV3a2	LHON	ADL10	gaba	unknown	NA	NA	4.19218910585817	4	715	95	95	109	1268.4402932998	267.354897981467	482.704055580695	88.5273514368818	0.148012894303806	NA
480257882	115	278	278	884	Traced	LHAV3a2_R	299080790	TRUE	right	LHAV3a2	LHAV3a2	LHON	ADL10	gaba	unknown	NA	NA	3.87757201646091	4	762	122	108	168	1393.27876258983	307.357027921035	554.321695154131	99.78143579505	0.177220576400203	NA
295807429	90	184	184	740	Traced	LHAV3a2_R	298991231	TRUE	right	LHAV3a2	LHAV3a2	LHON	ADL10	gaba	unknown	NA	NA	4.2158273381295	4	716	11	87	94	1096.2796869497	257.338526827646	402.51163981587	75.2843630012798	0.314979217221182	NA
326154371	114	254	254	804	Traced	LHAV3a2_R	311368160	TRUE	right	LHAV3a2	LHAV3a2	LHON	ADL10	gaba	unknown	NA	NA	4.03676470588235	4	718	79	112	138	1290.59422327906	279.462015336865	506.603712071586	58.6713424604077	0.182109715239308	NA
480257743	151	300	300	1106	Traced	LHAV3a2_R	336044318	TRUE	right	LHAV3a2	LHAV3a2	LHON	ADL10	gaba	unknown	NA	NA	3.55303810504634	4	882	210	103	190	1306.94259455171	335.017573013448	501.05046762841	114.130795867387	0.151018732356274	NA
480257914	139	306	306	983	Traced	LHAV3a2_R	299734485	TRUE	right	LHAV3a2	LHAV3a2	LHON	ADL10	gaba	unknown	NA	NA	3.57873210633947	4	817	138	94	199	1406.77809920684	289.694065696855	548.735655510503	113.209480822664	0.219995548280199	NA
357855613	99	276	276	838	Traced	LHAV3a3_R	307618069	TRUE	right	LHAV3a3	LHAV3a3	LHON	PDL17	unknown	unknown	NA	NA	3.9349173553719	4	838	0	121	154	1249.57082415914	338.519735053756	371.367133961031	106.980939219997	0.415851586382052	NA
696143413	290	602	602	3183	Traced	LHAV3a4_R	525239856	TRUE	right	LHAV3a4	LHAV3a4	LHON	NA	unknown	NA	NA	NA	3.4400826446281	3	1910	1217	176	416	2375.65454249093	590.400411249048	1010.89652003761	66.2742271476501	0.0612555197709584	NA
295780154	83	259	259	656	Traced	LHAV3a5_R	352783068	TRUE	right	LHAV3a5	LHAV3a5	LHON	ADL10	gaba	unknown	NA	NA	4.73498964803313	5	631	17	122	129	1344.9254953204	343.445542744049	480.794555845585	91.4278450578634	0.274758468283252	NA
295461707	83	210	210	649	Traced	LHAV3a5_R	274017961	TRUE	right	LHAV3a5	LHAV3a5	LHON	ADL10	gaba	unknown	NA	NA	4.74282786885246	5	634	12	114	89	1013.04742211915	290.486960074269	322.15555468069	67.5072377347986	0.237430739582088	NA
357496172	81	224	224	612	Traced	LHAV3a5_R	281897980	TRUE	right	LHAV3a5	LHAV3a5	LHON	ADL10	gaba	unknown	NA	NA	4.464859437751	5	539	54	112	107	1160.05821558924	252.030476243041	378.494588426798	84.9119256792913	0.151632359785698	NA
295785459	64	210	210	497	Traced	LHAV3a5_R	278649529	TRUE	right	LHAV3a5	LHAV3a5	LHON	ADL10	gaba	unknown	NA	NA	4.82098765432099	5	492	5	101	101	1063.53183060899	231.948807984622	383.03244518128	68.7680409106897	0.308077791516739	NA
480262270	135	228	228	876	Traced	LHAV3b10_R	364666195	TRUE	right	LHAV3b10	LHAV3b10	LHON	ADL10	gaba	unknown	NA	NA	3.990625	4	654	208	126	95	1552.20919969537	480.529064949278	562.363447512017	116.304728792084	0.0266790664211246	NA
360928792	141	170	170	885	Traced	LHAV3b10_R	377430921	TRUE	right	LHAV3b10	LHAV3b10	LHON	ADL10	gaba	unknown	NA	NA	3.69917012448133	4	641	230	52	106	1422.82092627616	370.892351911961	552.453271192029	116.135695364035	0.106775885724082	NA
605090489	149	189	189	946	Traced	LHAV3b11_R	388847384	TRUE	right	LHAV3b11	LHAV3b11	LHON	ADL10	gaba	unknown	NA	NA	3.60431654676259	4	727	155	87	95	1245.91567272207	283.630286958657	454.737335373509	139.872115366321	0.0905984139276654	NA
450609707	116	192	192	775	Traced	LHAV3b11_R	336267027	TRUE	right	LHAV3b11	LHAV3b11	LHON	ADL10	gaba	unknown	NA	NA	3.29399585921325	4	722	38	60	125	1339.06068199368	272.678868526666	504.230067365358	88.9111088047703	0.357558334631622	NA
449223379	112	163	163	749	Traced	LHAV3b11_R	312291276	TRUE	right	LHAV3b11	LHAV3b11	LHON	ADL10	gaba	unknown	NA	NA	4.07708119218911	4	697	4	53	94	1152.1435015706	271.677518694226	354.476790181123	158.908284689552	0.467520814220856	NA
480262368	132	195	195	806	Traced	LHAV3b11_R	342234863	TRUE	right	LHAV3b11	LHAV3b11	LHON	ADL10	gaba	unknown	NA	NA	3.80721649484536	4	744	34	68	110	1197.65491023188	251.077046957622	406.711613282414	165.63863550987	0.320110430430131	NA
359555689	522	785	785	4631	Traced	LHAV3b12_R	925133139	TRUE	right	LHAV3b12	LHAV3b12	LHON	PDL17	unknown	unknown	NA	NA	3.82919254658385	4	4499	53	350	414	2859.23573865722	967.746049336136	1038.22632570769	136.001956577338	0.350076106757649	NA
5813068507	425	1027	1027	3847	Traced	LHAV3b13_R	849576520	TRUE	right	LHAV3b13	LHAV3b13	LHON	ADL10	gaba	unknown	NA	NA	4.15376569037657	4	3475	364	659	333	3336.27634560245	1596.05801230476	871.724081293238	177.887034916464	0.0639294046134653	NA
5813047178	378	982	982	3252	Traced	LHAV3b13_R	804227312	TRUE	right	LHAV3b13	LHAV3b13	LHON	ADL10	gaba	unknown	NA	NA	3.99685534591195	4	1959	1269	245	719	3210.3221902742	658.065020022651	1764.99614719597	121.619850775079	0.0842762729735739	NA
391604407	186	183	183	1469	Traced	LHAV3b1_a_R	293692043	TRUE	right	LHAV3b1_a	LHAV3b1_a	LHON	ADL10	gaba	unknown	NA	NA	3.66735537190083	4	962	486	79	96	1093.38919155468	314.931159190035	387.507818709725	107.04062963563	0.0265587732452801	NA
5813098306	229	281	281	1784	Traced	LHAV3b1_a_R	351965345	TRUE	right	LHAV3b1_a	LHAV3b1_a	LHON	ADL10	gaba	unknown	NA	NA	3.74556830031283	4	951	770	123	147	1286.40400784464	337.412025067085	445.654092659794	134.461507404121	0.00557689791169325	NA
390931864	207	241	241	1629	Traced	LHAV3b1_b_R	293634365	TRUE	right	LHAV3b1_b	LHAV3b1_b	LHON	ADL04	acetylcholine	unknown	NA	NA	3.6469387755102	4	782	723	98	124	1199.37830613589	334.407299437427	391.30229682458	139.796055390254	0.00357355967631212	NA
449227486	272	425	425	2227	Traced	LHAV3b2_c_R	358451890	TRUE	right	LHAV3b2_c	LHAV3b2_c	LHON	ADL10	gaba	unknown	NA	NA	3.58488612836439	4	1356	860	181	236	1652.91655013105	546.595273717324	588.158092740866	95.560618509668	0.019568116774307	NA
541624179	323	376	376	2861	Traced	LHAV3b2_c_R	403580929	TRUE	right	LHAV3b2_c	LHAV3b2_c	LHON	ADL10	gaba	unknown	NA	NA	3.5380658436214	4	1634	1037	150	188	1573.0582259886	420.409905164264	546.599298541472	106.079025578116	0.0162674260417011	NA
542643555	114	151	151	938	Traced	LHAV3b3_R	306372356	TRUE	right	LHAV3b3	LHAV3b3	LHON	ADL10	gaba	unknown	NA	NA	3.41460905349794	4	709	218	48	92	1224.25740249895	365.98555202507	461.445453787829	72.4172467969773	0.114222301820713	NA
359555628	140	184	184	1125	Traced	LHAV3b3_R	302044126	TRUE	right	LHAV3b3	LHAV3b3	LHON	ADL10	gaba	unknown	NA	NA	3.62913223140496	4	824	240	77	94	1189.25043298358	318.601609232937	418.930485117031	92.1254700548078	0.0707955520681068	NA
5813010546	174	170	170	1376	Traced	LHAV3b3_R	311945002	TRUE	right	LHAV3b3	LHAV3b3	LHON	ADL10	gaba	unknown	NA	NA	3.49948927477017	4	893	372	72	86	1128.63578985208	275.898634088401	393.409767708888	111.063367391975	0.0379626501677199	NA
510943286	113	171	171	881	Traced	LHAV3b4_R	397763923	TRUE	right	LHAV3b4	LHAV3b4	LHON	ADL10	gaba	unknown	NA	NA	3.85915492957746	4	665	123	79	64	1272.65850545777	351.046316172596	352.71632258807	196.231892404161	0.0684743450448224	NA
421292214	124	457	457	803	Traced	LHAV3b5_R	338780481	TRUE	right	LHAV3b5	LHAV3b5	LHON	ADL10	gaba	unknown	NA	NA	3.75717213114754	4	500	246	65	384	1712.70160432197	224.255325645245	855.309010630585	119.761397288314	0.212260768974237	NA
541961677	135	399	399	921	Traced	LHAV3b5_R	377559893	TRUE	right	LHAV3b5	LHAV3b5	LHON	ADL10	gaba	unknown	NA	NA	3.72981366459627	4	630	259	67	325	1644.45351382262	257.395903626486	713.278838290628	100.656549494336	0.212032985187115	NA
449223347	113	212	212	859	Traced	LHAV3b5_R	349710050	TRUE	right	LHAV3b5	LHAV3b5	LHON	ADL10	gaba	unknown	NA	NA	3.60427263479145	4	632	214	76	132	1288.73261067894	277.772708451506	430.432757772756	76.5438138787262	0.0995637301518392	NA
450267976	146	449	449	974	Traced	LHAV3b6_a_R	332075085	TRUE	right	LHAV3b6_a	LHAV3b6_a	LHON	ADL10	gaba	unknown	NA	NA	3.70764462809917	4	665	267	106	336	1596.00409785682	251.939105647423	746.556995617182	90.7642598516792	0.162633554781659	NA
541961750	133	593	593	863	Traced	LHAV3b6_a_R	343779283	TRUE	right	LHAV3b6_a	LHAV3b6_a	LHON	ADL10	gaba	unknown	NA	NA	3.58659793814433	4	467	378	76	511	1866.85243500897	211.087895143294	1037.78175661362	66.0475498394519	0.147683329228273	NA
419234116	146	453	453	934	Traced	LHAV3b6_a_R	344156660	TRUE	right	LHAV3b6_a	LHAV3b6_a	LHON	ADL10	gaba	unknown	NA	NA	3.63271604938272	4	522	352	92	351	1701.15779788976	221.567825013318	785.495581264567	92.8332320431274	0.112222325251667	NA
390935343	164	288	288	1104	Traced	LHAV3b6_b_R	368965331	TRUE	right	LHAV3b6_b	LHAV3b6_b	LHON	ADL10	gaba	unknown	NA	NA	3.56770833333333	4	580	468	77	199	1491.04324731016	243.91180232431	604.213136315018	99.1311140023244	0.0499834138624822	NA
5813057662	170	319	319	1193	Traced	LHAV3b6_b_R	346774652	TRUE	right	LHAV3b6_b	LHAV3b6_b	LHON	ADL10	gaba	unknown	NA	NA	3.72717842323651	4	682	455	106	206	1515.11811012516	288.5254178986	617.604512273418	93.0975195962698	0.0444510072445348	NA
329566467	87	142	142	615	Traced	LHAV3b7_R	303883810	TRUE	right	LHAV3b7	LHAV3b7	LHON	ADL10	gaba	unknown	NA	NA	3.65605749486653	4	565	49	58	67	1019.08951187517	263.565539076791	345.727001015224	90.9701058040821	0.190491601484947	NA
419578845	131	222	222	1139	Traced	LHAV3b8_a_R	339984809	TRUE	right	LHAV3b8_a	LHAV3b8_a	LHON	ADL10	gaba	unknown	NA	NA	3.85567010309278	4	865	227	103	106	1182.15109686219	331.085145713214	329.474782644919	112.916505516228	0.0645125843544025	NA
480257919	149	254	254	1194	Traced	LHAV3b8_a_R	335230842	TRUE	right	LHAV3b8_a	LHAV3b8_a	LHON	ADL10	gaba	unknown	NA	NA	3.5319587628866	4	688	462	88	158	1301.68350792123	272.901936245789	496.445774967708	94.1920187278545	0.0364864948411514	NA
5813057660	106	188	188	943	Traced	LHAV3b8_b_R	306115430	TRUE	right	LHAV3b8_b	LHAV3b8_b	LHON	ADL04	acetylcholine	unknown	NA	NA	3.58691206543967	4	768	141	80	94	1155.78350830823	242.682529479846	348.046926979316	114.530092300043	0.11359845897205	NA
390254536	137	191	191	1176	Traced	LHAV3b8_b_R	316931216	TRUE	right	LHAV3b8_b	LHAV3b8_b	LHON	ADL04	acetylcholine	unknown	NA	NA	3.6901121304791	4	757	323	80	94	1252.11316067334	254.901418509863	420.965695100554	127.168105718978	0.0367657003251601	NA
449577409	89	107	107	670	Traced	LHAV3b9_a_R	286359977	TRUE	right	LHAV3b9_a	LHAV3b9_a	LHON	ADL10	gaba	unknown	NA	NA	4.08952187182096	4	635	18	42	54	1027.60181765602	234.213830227246	294.646663661435	105.832831140668	0.30988241783318	NA
451296290	65	190	190	479	Traced	LHAV3b9_b_R	275697486	TRUE	right	LHAV3b9_b	LHAV3b9_b	LHON	ADL04	acetylcholine	unknown	NA	NA	3.64742268041237	4	454	5	66	113	1156.78976763063	251.361294578844	452.65412184735	97.4681123858913	0.422791392768034	NA
358541542	163	393	393	1201	Traced	LHAV3c1_R	367990337	TRUE	right	LHAV3c1	LHAV3c1	LHON	PDL17	unknown	unknown	NA	NA	3.44467213114754	4	838	355	111	278	1434.38609175107	383.383318450775	551.312885150521	101.482678498068	0.120016214988847	NA
5813109792	191	495	495	1455	Traced	LHAV3c1_R	297332225	FALSE	right	LHAV3c1	LHAV3c1	LHON	PDL17	unknown	unknown	NA	NA	3.54649947753396	4	871	584	97	395	1698.99245036194	390.999198215542	812.1150790536	101.97967815681	0.113797028052488	NA
358538040	172	483	483	1339	Traced	LHAV3c1_R	279814930	FALSE	right	LHAV3c1	LHAV3c1	LHON	PDL17	unknown	unknown	NA	NA	3.48712667353244	4	860	479	120	359	1604.61699255607	409.257513073877	714.637093408945	103.451294916557	0.106636445151616	PV6a3 (Dolan et al. eLife 2019)
510956443	133	383	383	1166	Traced	LHAV3c1_R	341879137	TRUE	right	LHAV3c1	LHAV3c1	LHON	PDL17	unknown	unknown	NA	NA	3.89473684210526	4	965	175	154	226	1435.7468913977	389.779457605679	585.445604527568	49.7382102032528	0.154139044321593	NA
510956058	137	443	443	1213	Traced	LHAV3c1_R	355447241	TRUE	right	LHAV3c1	LHAV3c1	LHON	PDL17	unknown	unknown	NA	NA	3.54303278688525	4	953	244	143	296	1663.60533680956	454.275640368977	706.641214420421	106.740720710317	0.163149084440009	NA
387538632	110	333	333	954	Traced	LHAV3c2_R	279784999	TRUE	right	LHAV3c2	LHAV3c2	LHON	PDL17	unknown	unknown	NA	NA	3.91277258566978	4	942	8	156	171	1346.54959644615	409.027748524027	421.624889355551	122.108565054351	0.337292635536792	NA
388898076	106	288	288	889	Traced	LHAV3c2_R	310283248	TRUE	right	LHAV3c2	LHAV3c2	LHON	PDL17	unknown	unknown	NA	NA	3.81165452653486	4	867	6	128	157	1333.99175436454	355.466342187142	408.824280890495	127.268580273499	0.369259422537073	NA
358538491	106	267	267	793	Traced	LHAV3c2_R	304077111	TRUE	right	LHAV3c2	LHAV3c2	LHON	PDL17	unknown	unknown	NA	NA	3.72530864197531	4	689	103	88	178	1214.75055985237	281.353940847497	434.191277872212	102.685300928901	0.230407486768676	NA
541965840	91	163	163	766	Traced	LHAV3c3_R	216694136	TRUE	right	LHAV3c3	LHAV3c3	LHON	PDL17	unknown	unknown	NA	NA	3.63125638406537	4	496	270	72	87	1058.94703002609	327.105258507535	309.367275105072	67.5591112435048	0.0241974825888823	NA
5901194027	98	222	222	888	Traced	LHAV3c3_R	255964451	TRUE	right	LHAV3c3	LHAV3c3	LHON	PDL17	unknown	unknown	NA	NA	3.41948717948718	4	474	407	56	164	1166.62766900798	240.935430387379	481.76242952335	104.772569784964	0.0535327871784762	NA
665454282	545	419	419	6477	Traced	LHAV3d1_R	646150402	TRUE	right	LHAV3d1	LHAV3d1	LHON	ADL24	unknown	unknown	NA	NA	3.56412930135558	4	5238	1189	135	275	2387.26616435735	611.806918252885	940.676383885216	123.344120326512	0.137530706414311	NA
5813078194	350	627	627	2710	Traced	LHAV3e1_R	654683548	TRUE	right	LHAV3e1	LHAV3e1	LHON	AVL18	unknown	unknown	NA	NA	3.73565573770492	4	2136	567	143	484	2256.96223380947	518.662900030389	1141.03823233234	110.408994084131	0.21807167178251	NA
822692353	440	775	775	3606	Traced	LHAV3e1_R	748754054	TRUE	right	LHAV3e1	LHAV3e1	LHON	AVL18	unknown	unknown	NA	NA	4.0125	4	3074	532	222	550	2547.74895430507	699.097477567251	1175.48589298771	96.16843916852	0.233491131738059	NA
790288721	350	532	532	2657	Traced	LHAV3e2_R	689004793	TRUE	right	LHAV3e2	LHAV3e2	LHON	AVL18	unknown	unknown	NA	NA	3.76946721311475	4	1265	1370	73	451	2235.29979975019	365.169532302574	1217.35544033188	67.8247147244705	0.0822139721341257	NA
822004733	431	697	697	3324	Traced	LHAV3e2_R	786837194	TRUE	right	LHAV3e2	LHAV3e2	LHON	AVL18	unknown	unknown	NA	NA	3.82622268470343	4	1515	1753	79	614	2700.47394441679	358.612257483658	1640.94552291194	65.9344447495816	0.0910631103186313	NA
390560212	405	337	337	3944	Traced	LHAV3e3_R	835932608	TRUE	right	LHAV3e3	LHAV3e3	LHON	AVL18	unknown	unknown	NA	NA	3.55383022774327	4	3097	842	65	268	2188.66998563486	514.581287698598	855.133999725009	170.147787885789	0.20440114631942	NA
5813009781	484	587	587	4263	Traced	LHAV3e3_R	1127933774	TRUE	right	LHAV3e3	LHAV3e3	LHON	AVL18	unknown	unknown	NA	NA	3.75389408099688	4	619	3349	72	503	2813.11811902796	173.24419872011	1583.42229244911	153.635565251246	0.0011179889917815	NA
607441336	247	446	446	1961	Traced	LHAV3e4_a_R	620229002	TRUE	right	LHAV3e4_a	LHAV3e4_a	LHON	AVL18	unknown	unknown	NA	NA	3.45341614906832	3	1675	286	90	352	2170.27804593344	387.954599830118	1160.48801120981	101.952039979194	0.307465192215725	NA
666122442	272	372	372	2067	Traced	LHAV3e4_a_R	595631131	TRUE	right	LHAV3e4_a	LHAV3e4_a	LHON	AVL18	unknown	unknown	NA	NA	3.37551440329218	3	1656	402	61	310	1869.71540623008	319.976035773273	936.628915842115	139.85029952544	0.276602708811701	NA
5813011773	228	445	445	1776	Traced	LHAV3e4_b_R	623604157	TRUE	right	LHAV3e4_b	LHAV3e4_b	LHON	AVL18	unknown	unknown	NA	NA	3.50363447559709	4	1456	281	105	335	2159.0352845596	373.782474147047	1124.91111933576	97.5531455678314	0.261306594128915	NA
605058898	150	218	218	1218	Traced	LHAV3e5_R	395572380	TRUE	right	LHAV3e5	LHAV3e5	LHON	AVL18	unknown	unknown	NA	NA	3.50565262076053	4	1075	120	65	152	1423.60264932424	267.980126593844	702.239402944809	117.970977146674	0.280392630935536	NA
574041014	247	436	436	1910	Traced	LHAV3e5_R	638910097	TRUE	right	LHAV3e5	LHAV3e5	LHON	AVL18	unknown	unknown	NA	NA	3.54677754677755	4	1504	356	110	324	2133.73973986115	381.903245422407	1122.58053125044	118.078424797088	0.216128127154928	NA
390603428	153	353	353	1233	Traced	LHAV3e7_R	437747548	TRUE	right	LHAV3e7	LHAV3e7	LHON	AVL18	unknown	unknown	NA	NA	3.24180327868852	3	1147	12	65	268	1617.81342601198	289.991116801559	766.261856261203	171.008371424305	0.617574930071933	NA
575389396	143	229	229	1162	Traced	LHAV3e8_R	372652370	TRUE	right	LHAV3e8	LHAV3e8	LHON	AVL18	unknown	unknown	NA	NA	3.56024716786818	4	1129	15	57	162	1334.11649811888	302.559362867458	672.639734930812	128.110983516877	0.533972048563158	NA
574377845	1260	2338	2338	13829	Traced	LHAV3f1_R	1772100050	TRUE	right	LHAV3f1	LHAV3f1	LHON	ADL24	unknown	unknown	NA	NA	3.26163391933816	3	11679	2080	1436	874	5197.64914698479	2690.81412488525	1556.97625122505	31.7962606416512	0.0440291488736744	NA
544699051	209	452	452	2479	Traced	LHAV3g1_R	371240855	TRUE	right	LHAV3g1	LHAV3g1	LHLN	ADL24	unknown	unknown	NA	NA	3.36494845360825	3	1385	1006	94	343	1886.36409485472	433.00396813741	841.109187998347	87.9702492472092	0.0842465499000162	NA
5813009276	188	454	454	2155	Traced	LHAV3g1_R	321550071	TRUE	right	LHAV3g1	LHAV3g1	LHLN	ADL24	unknown	unknown	NA	NA	3.30173292558614	3	1181	941	109	330	1872.57699053818	387.291639362777	831.262114237368	118.199613918581	0.0611837393844168	NA
698185483	293	656	656	2722	Traced	LHAV3g2_a_R	371687612	TRUE	right	LHAV3g2_a	LHAV3g2_a	LHON	ADL24	unknown	unknown	NA	NA	3.51763485477178	4	2021	688	88	551	2045.26379351049	340.632344146288	1105.61908784134	77.7426159942071	0.254369150087336	NA
698180927	361	694	694	3583	Traced	LHAV3g2_b_R	511015713	TRUE	right	LHAV3g2_b	LHAV3g2_b	LHON	ADL10	gaba	unknown	NA	NA	3.64864864864865	4	2707	863	110	572	2167.75534767801	396.335559837775	1085.76919621278	113.5035904521	0.236482502051784	NA
360259229	909	1493	1493	8546	Traced	LHAV3h1_R	1486475098	TRUE	right	LHAV3h1	LHAV3h1	LHON	NA	unknown	NA	NA	NA	4.05082987551867	4	7451	1082	767	713	5314.45527230103	1864.73067138451	2181.53029358082	76.4244576754619	0.104729734322604	NA
5901196932	335	547	547	2814	Traced	LHAV3i1_R	760342232	TRUE	right	LHAV3i1	LHAV3i1	LHON	ADL04	acetylcholine	unknown	NA	NA	3.62266112266112	4	1737	1054	182	353	2440.59081914421	601.73930384641	1117.59954499233	153.291257257958	0.0495370941027029	NA
297851977	1029	1967	1967	7372	Traced	LHAV3j1_R	1591283098	TRUE	right	LHAV3j1	LHAV3j1	LHON	NA	unknown	NA	NA	NA	4.45540398740818	4	3758	3320	829	920	5119.9447326535	1478.18376524442	1832.61182843012	103.533065319136	0.00207248684734707	NA
424716408	1326	2376	2376	13312	Traced	LHAV3k1_R	1844889630	TRUE	right	LHAV3k1	LHAV3k1	LHON	NA	unknown	NA	NA	NA	3.67674661105318	4	11112	2107	1014	1316	6352.09336249739	2076.38212747845	2752.74252986917	82.7209613653921	0.122042098857309	NA
5813010511	564	634	634	4870	Traced	LHAV3k2_R	856328593	TRUE	right	LHAV3k2	LHAV3k2	LHON	ADL24	unknown	unknown	NA	NA	3.98125	4	4793	27	278	346	2392.82704444738	707.538659842993	902.648275234556	85.5442079370833	0.394179184575825	NA
482680447	489	739	739	3813	Traced	LHAV3k3_R	752992980	TRUE	right	LHAV3k3	LHAV3k3	LHON	ADL24	unknown	unknown	NA	NA	3.47929606625259	3	1949	1715	210	503	2627.42955314781	592.929182586464	1309.38988452951	65.9291001852642	0.0355224450049059	NA
5813097073	608	700	700	5324	Traced	LHAV3k4_R	922868417	TRUE	right	LHAV3k4	LHAV3k4	LHON	ADL10	gaba	unknown	NA	NA	3.34259259259259	3	3129	2192	177	514	3141.25250780539	731.662831305352	1493.55791800847	105.50141658248	0.064690732773152	NA
328543014	656	2204	2204	7512	Traced	LHAV3k5_R	1379946549	TRUE	right	LHAV3k5	LHAV3k5	LHON	PDL17	unknown	unknown	NA	NA	4.12512820512821	4	4685	2729	1021	1131	4832.20087282678	1491.49569908253	1864.86801435642	137.078469639356	0.0166035647511302	NA
359581549	500	871	871	4278	Traced	LHAV3k6_R	931144563	TRUE	right	LHAV3k6	LHAV3k6	LHON	ADL24	unknown	unknown	NA	NA	3.89538461538462	4	4135	39	473	378	3195.01354017117	1115.32479421029	1202.72394621178	107.295801697776	0.276299599197153	AV6b1 (Dolan et al. eLife 2019)
513029260	89	229	229	937	Traced	LHAV3l1_R	226704066	TRUE	right	LHAV3l1	LHAV3l1	LHON	NA	unknown	NA	NA	NA	3.78899082568807	4	703	171	102	120	1064.91997305386	253.714765984728	456.401338270126	148.138979531076	0.0889405342744689	NA
360255138	1024	1633	1633	9499	Traced	LHAV3m1_R	1538337620	TRUE	right	LHAV3m1	LHAV3m1	LHON	ADL24	unknown	unknown	NA	NA	4.33401849948613	4	4301	5109	247	1358	5176.77604207995	773.717448048235	3140.34575499889	206.524316614959	0.0634152676647185	NA
356832508	183	251	251	1520	Traced	LHAV3n1_R	395235350	TRUE	right	LHAV3n1	LHAV3n1	LHON	ADL10	gaba	unknown	NA	NA	4.24355005159959	4	1322	122	110	121	1268.08382710042	344.613569939151	371.877974583931	101.28563701271	0.171947039632744	NA
325834652	244	371	371	2136	Traced	LHAV3n1_R	524144080	TRUE	right	LHAV3n1	LHAV3n1	LHON	ADL10	gaba	unknown	NA	NA	5.01143451143451	4	2017	29	129	226	1878.03503271611	535.731210458327	640.147571372414	70.5906449473225	0.425355739437857	NA
418861761	217	351	351	1764	Traced	LHAV3n1_R	431343941	TRUE	right	LHAV3n1	LHAV3n1	LHON	ADL10	gaba	unknown	NA	NA	4.36111111111111	4	1743	21	126	219	1495.56947262212	466.425852108771	496.89901703742	78.2472804387187	0.433146432244881	NA
449223263	171	217	217	1371	Traced	LHAV3n1_R	348745411	TRUE	right	LHAV3n1	LHAV3n1	LHON	ADL10	gaba	unknown	NA	NA	4.23251028806584	4	1232	24	113	91	1251.04040857242	394.433416058697	277.902293343898	177.349148718764	0.243219555547091	NA
448899493	246	441	441	1985	Traced	LHAV3n1_R	606453094	TRUE	right	LHAV3n1	LHAV3n1	LHON	ADL10	gaba	unknown	NA	NA	5.11225540679712	4	1635	348	138	296	2217.13971066052	565.265403949432	859.520441476955	81.5483075063641	0.183380952490431	NA
5813047004	150	245	245	1247	Traced	LHAV3n1_R	345297179	TRUE	right	LHAV3n1	LHAV3n1	LHON	ADL10	gaba	unknown	NA	NA	3.94455852156057	4	1229	11	118	121	1285.0202226312	410.75883053934	368.774467352376	70.2985981106439	0.330664374197477	NA
511621576	460	319	319	4656	Traced	LHAV3o1_R	689753784	TRUE	right	LHAV3o1	LHAV3o1	LHLN	ADL10	gaba	unknown	NA	NA	3.89730290456432	4	2855	1770	77	233	1921.62012157132	544.396658321292	818.788591270555	105.935900986555	0.0704668738079064	NA
480586157	470	333	333	4937	Traced	LHAV3o1_R	658043159	TRUE	right	LHAV3o1	LHAV3o1	LHON	ADL10	gaba	unknown	NA	NA	3.86742034943474	4	2747	2170	81	239	1984.16599021681	551.29936216444	821.435488572826	80.9108152529286	0.0480898055734916	NA
511262952	480	348	348	5005	Traced	LHAV3o1_R	703554581	TRUE	right	LHAV3o1	LHAV3o1	LHON	ADL10	gaba	unknown	NA	NA	3.89241803278689	4	4374	406	142	189	1906.96844751367	798.022279465098	488.714058119434	122.345150790279	0.181953696006734	NA
633793553	724	1387	1387	7768	Traced	LHAV3p1_R	949101396	TRUE	right	LHAV3p1	LHAV3p1	LHON	ADL24	unknown	unknown	NA	NA	3.47901740020471	3	2838	4751	454	911	3383.99328041605	677.888695357691	1621.97586676535	123.705863815129	0.00112680443967583	NA
633097828	838	1470	1470	8948	Traced	LHAV3q1_R	1026581314	TRUE	right	LHAV3q1	LHAV3q1	LHON	ADL04	acetylcholine	unknown	NA	NA	3.36354166666667	3	8423	488	439	1014	3159.39162417042	973.512502404582	1313.28858003793	68.7803319895213	0.358643734046394	NA
760541793	167	318	318	1809	Traced	LHAV4a1_a_R	266789649	TRUE	right	LHAV4a1_a	LHAV4a1_a	LHLN	ADL05	gaba	unknown	NA	NA	3.24766839378238	3	837	962	72	241	1304.56691368255	299.21000907216	543.446302109504	88.0762844869452	0.0360731845721308	NA
5813098080	447	540	540	3954	Traced	LHAV4a1_b_R	670133411	TRUE	right	LHAV4a1_b	LHAV4a1_b	LHLN	ADL01	gaba	unknown	NA	NA	3.27604166666667	3	3319	567	264	261	2525.83517703857	933.226378896013	643.910979647007	125.105481788306	0.0939944585880912	NA
728483069	542	1316	1316	3920	Traced	LHAV4a1_b_R	757985156	TRUE	right	LHAV4a1_b	LHAV4a1_b	LHLN	ADL01	gaba	unknown	NA	NA	3.16908713692946	3	2599	1210	816	485	3505.18065752922	1607.76214817836	856.614249580214	77.9362132414589	0.00226429949691553	NA
822289778	368	825	825	2385	Traced	LHAV4a1_b_R	529042719	TRUE	right	LHAV4a1_b	LHAV4a1_b	LHLN	ADL01	gaba	unknown	NA	NA	3.2218782249742	3	1006	1379	278	540	2338.75735405098	605.369891980848	924.302808638656	98.6205956088171	0.00474252344780068	NA
823668338	226	580	580	1751	Traced	LHAV4a1_b_R	430532821	TRUE	right	LHAV4a1_b	LHAV4a1_b	LHLN	ADL01	gaba	unknown	NA	NA	3.34022750775595	3	567	1172	126	450	1891.04139653161	374.904319385765	851.088468599974	101.047799574454	0.00953405556319586	NA
5813058137	659	1519	1519	6499	Traced	LHAV4a1_c_R	949755650	TRUE	right	LHAV4a1_c	LHAV4a1_c	LHLN	ADL01	gaba	unknown	NA	NA	3.37190082644628	3	4016	2428	669	829	4514.44926273472	1500.36853491298	1755.91247212302	74.9609460990957	0.0200687515775689	NA
637121971	906	1719	1719	8991	Traced	LHAV4a2_R	1071446094	TRUE	right	LHAV4a2	LHAV4a2	LHLN	ADL01	gaba	unknown	NA	NA	3.4830421377184	3	2931	6048	228	1482	4891.43640147198	724.647525836116	2777.59282659934	51.9123000939297	0.0310288581561146	NA
851317951	224	459	459	1692	Traced	LHAV4a3_a_R	352647650	TRUE	right	LHAV4a3_a	LHAV4a3_a	LHLN	ADL01	gaba	unknown	NA	NA	3.13729508196721	3	926	730	163	289	1510.89203404602	338.0980647231	714.82549998189	71.4969207530263	0.0257935555052193	NA
881991445	222	575	575	1639	Traced	LHAV4a3_a_R	386956185	TRUE	right	LHAV4a3_a	LHAV4a3_a	LHLN	ADL01	gaba	unknown	NA	NA	3.21663244353183	3	591	973	163	406	1646.87321351373	306.628916185653	838.356321110013	115.152043897722	0.00630078995729422	NA
820581199	131	339	339	1060	Traced	LHAV4a3_a_R	225005908	TRUE	right	LHAV4a3_a	LHAV4a3_a	LHLN	ADL01	gaba	unknown	NA	NA	3.17956656346749	3	661	389	74	262	1231.55478041851	216.625889759907	584.223736081251	108.858215644758	0.115734944836119	NA
794337453	145	555	555	1158	Traced	LHAV4a3_a_R	301791643	TRUE	right	LHAV4a3_a	LHAV4a3_a	LHLN	ADL01	gaba	unknown	NA	NA	3.26239669421488	3	447	677	152	399	1630.28840372842	387.550018478849	795.933047353945	83.2392501947634	0.0115121598427158	NA
975432645	140	411	411	1176	Traced	LHAV4a3_a_R	275611981	TRUE	right	LHAV4a3_a	LHAV4a3_a	LHLN	ADL01	gaba	unknown	NA	NA	3.12755102040816	3	559	617	87	322	1363.36407411241	216.621382123213	767.561411457252	32.5790454994236	0.0508488220269517	NA
5901195038	171	436	436	1691	Traced	LHAV4a3_b_R	273764149	TRUE	right	LHAV4a3_b	LHAV4a3_b	LHLN	ADL01	gaba	unknown	NA	NA	3.28762886597938	3	950	633	211	213	1495.72482977612	462.23967202038	522.541391471358	86.2564520787047	0.00689773700274987	NA
883031393	236	632	632	1875	Traced	LHAV4a3_b_R	358965500	TRUE	right	LHAV4a3_b	LHAV4a3_b	LHLN	ADL01	gaba	unknown	NA	NA	3.24922760041195	3	686	1154	186	438	1540.30648031286	287.604217642368	810.25702342537	103.951522508252	0.00415808501123827	NA
917086906	208	540	540	1747	Traced	LHAV4a3_b_R	318744231	TRUE	right	LHAV4a3_b	LHAV4a3_b	LHLN	ADL01	gaba	unknown	NA	NA	3.24382716049383	3	493	1186	144	392	1496.70950872106	234.816678963787	725.369376857476	126.924865057202	0.000509127792890696	NA
823999989	189	487	487	1807	Traced	LHAV4a3_b_R	286400387	TRUE	right	LHAV4a3_b	LHAV4a3_b	LHLN	ADL01	gaba	unknown	NA	NA	3.22461538461538	3	467	1340	120	365	1503.17666058322	283.327790965021	773.455339646532	38.66450088407	0.000103537981524626	NA
669869547	230	420	420	1920	Traced	LHAV4a4_R	334728169	TRUE	right	LHAV4a4	LHAV4a4	LHLN	ADL01	gaba	unknown	NA	NA	3.34702258726899	3	1199	708	219	196	1506.35060435617	544.690387350682	475.865445365147	25.0861315943457	0.00660601170562558	NA
856407289	150	241	241	1166	Traced	LHAV4a4_R	302523344	TRUE	right	LHAV4a4	LHAV4a4	LHLN	ADL01	gaba	unknown	NA	NA	3.22949117341641	3	810	346	97	142	1088.54968633932	304.590197774045	447.553676944935	10.1920787450309	0.0565873178178707	AV4a3 (Dolan et al. eLife 2019)
980198319	116	286	286	1030	Traced	LHAV4a4_R	251150742	TRUE	right	LHAV4a4	LHAV4a4	LHLN	ADL01	gaba	unknown	NA	NA	3.19875130072841	3	382	626	90	194	1034.4644945466	192.232422361692	499.546199743766	13.0172758863415	0.00274654028583532	AV4a3 (Dolan et al. eLife 2019); Local7 (Jeanne et al. Neuron 2018)
851684210	120	274	274	1005	Traced	LHAV4a4_R	231183910	TRUE	right	LHAV4a4	LHAV4a4	LHLN	ADL01	gaba	unknown	NA	NA	3.14388489208633	3	642	329	106	165	1104.27424229543	270.212001135886	447.906496164404	17.3330347586833	0.0486163110719889	NA
918123297	94	212	212	916	Traced	LHAV4a4_R	248435247	TRUE	right	LHAV4a4	LHAV4a4	LHLN	ADL01	gaba	unknown	NA	NA	3.09846153846154	3	758	88	152	53	980.108509377864	444.403013557915	118.861637922806	29.0232726485864	0.0284257469701024	NA
5813014585	79	250	250	705	Traced	LHAV4a4_R	224522366	TRUE	right	LHAV4a4	LHAV4a4	LHLN	ADL01	gaba	unknown	NA	NA	3.18930041152263	3	371	290	78	171	987.707936124444	186.020727856219	435.036726007278	37.5358571576841	0.0424928774767441	AV4a3 (Dolan et al. eLife 2019)
789580340	120	372	372	1272	Traced	LHAV4a5_R	284820185	TRUE	right	LHAV4a5	LHAV4a5	LHLN	ADL01	gaba	unknown	NA	NA	3.28527607361963	3	538	722	43	327	1387.7218992927	145.956148347336	781.55060547774	87.0699693370218	0.078871962333844	NA
5813061530	165	397	397	1883	Traced	LHAV4a5_R	328464227	TRUE	right	LHAV4a5	LHAV4a5	LHLN	ADL01	gaba	unknown	NA	NA	3.33162217659138	3	1152	703	108	271	1347.13056240915	330.720486186807	602.112553409279	40.7032451106933	0.0715159251156425	NA
604031105	132	375	375	1177	Traced	LHAV4a5_R	241132280	TRUE	right	LHAV4a5	LHAV4a5	LHLN	ADL01	gaba	unknown	NA	NA	3.23926380368098	3	784	393	156	211	1360.73822563325	439.014939818349	485.350353210785	113.252220620903	0.039538490896429	NA
1039867920	142	367	367	1141	Traced	LHAV4a6_R	341115652	TRUE	right	LHAV4a6	LHAV4a6	LHON	ADL01	gaba	unknown	NA	NA	3.36194415718718	3	770	348	190	174	1675.0763901589	555.72739615399	609.055318549571	90.5162318984174	0.0197325410183542	AV4b4 (Dolan et al. eLife 2019)
882685590	107	272	272	953	Traced	LHAV4a6_R	198066365	TRUE	right	LHAV4a6	LHAV4a6	LHLN	ADL01	gaba	unknown	NA	NA	3.1923474663909	3	733	192	159	101	1183.78301705658	473.33369749973	238.274736644202	102.515153187748	0.0267302034732604	NA
792610827	103	175	175	876	Traced	LHAV4a6_R	193440969	TRUE	right	LHAV4a6	LHAV4a6	LHLN	ADL01	gaba	unknown	NA	NA	3.30434782608696	3	628	212	118	52	1055.92513206578	418.76124017352	209.893722576315	69.1608035218729	0.00222933717958773	NA
761580655	150	340	340	1569	Traced	LHAV4a7_R	302137561	TRUE	right	LHAV4a7	LHAV4a7	LHLN	ADL01	gaba	unknown	NA	NA	3.17538461538462	3	1138	402	60	263	1462.12122566039	330.186823765386	586.322567391321	62.8623997520602	0.203431096745919	NA
5813010845	153	333	333	1752	Traced	LHAV4a7_R	342850230	TRUE	right	LHAV4a7	LHAV4a7	LHLN	ADL01	gaba	unknown	NA	NA	3.30564102564103	3	1017	694	74	254	1390.38569216244	277.593477015112	700.838541539551	87.7474054650359	0.0865915182383949	NA
667474054	163	492	492	1722	Traced	LHAV4a7_R	347228988	TRUE	right	LHAV4a7	LHAV4a7	LHLN	ADL01	gaba	unknown	NA	NA	3.19774590163934	3	940	690	52	424	1727.53442505173	252.505273491093	907.993889000355	51.9979206579287	0.161229198469792	NA
823988254	177	238	238	2054	Traced	LHAV4a7_R	273740730	TRUE	right	LHAV4a7	LHAV4a7	LHLN	ADL01	gaba	unknown	NA	NA	3.21865284974093	3	1298	652	69	156	1221.25870397953	333.428347116028	391.154242290413	86.4933658965624	0.0741947023746405	NA
729211483	118	302	302	1115	Traced	LHAV4b1_a_R	268255353	TRUE	right	LHAV4b1_a	LHAV4b1_a	LHLN	ADL05	gaba	unknown	NA	NA	3.44709543568465	3	541	529	77	223	1326.23034260461	198.802310198978	673.938049798982	74.4210307277841	0.0424743364307387	NA
696095464	139	263	263	1264	Traced	LHAV4b1_a_R	288837615	TRUE	right	LHAV4b1_a	LHAV4b1_a	LHON	ADL05	gaba	unknown	NA	NA	3.30061983471074	3	709	534	107	149	1425.35263320921	335.117162388784	589.408996239116	21.3506280251915	0.0144666467241541	NA
5813010799	119	235	235	1108	Traced	LHAV4b1_b_R	260631672	TRUE	right	LHAV4b1_b	LHAV4b1_b	LHON	ADL05	gaba	unknown	NA	NA	3.32164948453608	3	801	300	87	145	1230.84205544884	300.110949376793	503.056729902601	53.5563052646455	0.0820978295007041	NA
731270909	105	228	228	1020	Traced	LHAV4b1_b_R	269158216	TRUE	right	LHAV4b1_b	LHAV4b1_b	LHON	ADL05	gaba	unknown	NA	NA	3.32231404958678	3	660	357	98	129	1321.35233311577	325.522402420639	589.454163114037	39.5498913735749	0.0304120487699757	NA
634712475	118	297	297	1000	Traced	LHAV4b1_b_R	310157959	TRUE	right	LHAV4b1_b	LHAV4b1_b	LHON	ADL05	gaba	unknown	NA	NA	3.19120654396728	3	375	583	76	213	1509.61738813999	230.354203827678	730.310637076587	58.6833632245181	0.012178099191658	NA
822622842	98	189	189	840	Traced	LHAV4b1_b_R	240563951	TRUE	right	LHAV4b1_b	LHAV4b1_b	LHON	ADL05	gaba	unknown	NA	NA	3.16269430051813	3	547	236	87	98	1105.55663028804	324.540093240558	345.721903920174	43.392538780484	0.0350773266378764	NA
480931586	89	36	36	815	Traced	LHAV4b2_a_R	122926848	FALSE	right	LHAV4b2_a	LHAV4b2_a	LHLN	ADL05	gaba	unknown	NA	NA	3.16416416416416	3	268	452	9	25	541.587142531611	128.872559546136	147.703769046604	126.668483513262	0.00610635941744764	NA
911984113	0	44	44	0	Traced	LHAV4b2_a_R	111113387	TRUE	right	LHAV4b2_a	LHAV4b2_a	LHLN	ADL05	gaba	unknown	NA	NA	3.17575757575758	3	0	0	0	0	441.865080043171	NA	NA	NA	0	NA
849918343	74	110	110	668	Traced	LHAV4b2_b_R	190239232	TRUE	right	LHAV4b2_b	LHAV4b2_b	LHLN	ADL05	gaba	unknown	NA	NA	3.45045965270684	3	296	333	21	84	918.872951501058	118.489297932006	373.410489753204	43.1028739073758	0.0481073544214841	NA
635091875	93	88	88	871	Traced	LHAV4b2_b_R	256970741	TRUE	right	LHAV4b2_b	LHAV4b2_b	LHON	ADL05	gaba	unknown	NA	NA	3.11267605633803	3	409	360	30	53	966.584472566364	157.006415822182	362.208768155993	30.7065778338655	0.0161490590888865	NA
669857319	135	168	168	1562	Traced	LHAV4b3_R	260158482	TRUE	right	LHAV4b3	LHAV4b3	LHON	ADL05	gaba	unknown	NA	NA	3.10685483870968	3	663	802	33	131	1241.84611096407	194.122021088095	493.58817309235	68.927795877526	0.0387916257177914	NA
5901197773	101	98	98	981	Traced	LHAV4b3_R	181391828	TRUE	right	LHAV4b3	LHAV4b3	LHON	ADL05	gaba	unknown	NA	NA	3.09547738693467	3	472	459	22	75	971.000560274684	164.758534044476	372.242473399378	17.4923287517988	0.0454939108720339	NA
762262916	122	161	161	1124	Traced	LHAV4b3_R	216502262	FALSE	right	LHAV4b3	LHAV4b3	LHON	ADL05	gaba	unknown	NA	NA	3.99897119341564	3	772	195	77	81	1000.49148715154	299.447815486436	269.564788629947	57.5198694736218	0.0684091591259365	NA
818888010	101	145	145	910	Traced	LHAV4b3_R	250597676	TRUE	right	LHAV4b3	LHAV4b3	LHON	ADL05	gaba	unknown	NA	NA	3.63298969072165	3	665	206	96	43	913.575896016487	335.266529127316	108.219120331022	74.2229074768535	0.00405497453485848	AV4b4 (Dolan et al. eLife 2019)
575729037	257	444	444	2523	Traced	LHAV4b4_R	496229762	TRUE	right	LHAV4b4	LHAV4b4	LHON	ADL05	gaba	unknown	NA	NA	3.25051759834369	3	1756	685	193	240	1647.65942461151	557.842418644882	624.670926873033	50.4802222039967	0.0485989271471741	NA
5813012448	259	430	430	2557	Traced	LHAV4b4_R	495595215	TRUE	right	LHAV4b4	LHAV4b4	LHON	ADL05	gaba	unknown	NA	NA	3.26722338204593	3	1425	1129	132	298	1722.43226593055	465.046651777701	761.840547615487	45.090494358608	0.0383997937216329	NA
851309562	260	399	399	2725	Traced	LHAV4b4_R	431508294	TRUE	right	LHAV4b4	LHAV4b4	LHLN	ADL05	gaba	unknown	NA	NA	3.18229166666667	3	1825	900	186	212	1690.8306863272	581.169829686664	582.454334688698	48.8659330533079	0.024982591554813	NA
857451691	103	144	144	981	Traced	LHAV4b5_R	276360467	TRUE	right	LHAV4b5	LHAV4b5	LHON	ADL05	gaba	unknown	NA	NA	3.45015416238438	4	902	79	86	58	1098.96942923982	452.356274401021	312.548959977326	7.62146031294737	0.104427314725105	NA
918468865	93	131	131	954	Traced	LHAV4b5_R	253339421	TRUE	right	LHAV4b5	LHAV4b5	LHON	ADL05	gaba	unknown	NA	NA	4.08212058212058	4	805	83	51	71	902.448602183068	252.658983851102	247.953326335351	121.697825651898	0.195107790618021	NA
5813035150	96	210	210	922	Traced	LHAV4b6_R	243073400	TRUE	right	LHAV4b6	LHAV4b6	LHLN	ADL05	gaba	unknown	NA	NA	3.21604938271605	3	591	331	79	125	1113.7380060032	331.612108310081	344.138312603465	84.6581506562393	0.0411660470752205	NA
511949534	104	266	266	1103	Traced	LHAV4b6_R	261152168	TRUE	right	LHAV4b6	LHAV4b6	LHLN	ADL05	gaba	unknown	NA	NA	3.30840163934426	3	790	279	168	97	1232.29364341284	516.701555671995	260.187989030614	81.61735072745	0.00837737539346584	NA
543333530	99	289	289	788	Traced	LHAV4b6_R	236034715	TRUE	right	LHAV4b6	LHAV4b6	LHLN	ADL05	gaba	unknown	NA	NA	3.17163412127441	3	582	206	146	139	1177.44353325295	417.287329826295	357.984218785227	65.941685284159	0.0381004734501437	NA
856408517	138	412	412	1192	Traced	LHAV4c1_a_R	344786858	TRUE	right	LHAV4c1_a	LHAV4c1_a	LHON	ADL01	gaba	unknown	NA	NA	3.55566905005107	4	843	343	216	193	1520.70541038411	651.104208894601	469.095025936595	19.3888495280407	0.0242934395626594	NA
703305408	172	499	499	1561	Traced	LHAV4c1_a_R	360523837	TRUE	right	LHAV4c1_a	LHAV4c1_a	LHON	ADL01	gaba	unknown	NA	NA	3.68224299065421	4	868	565	183	300	1585.5153630194	467.572442967769	668.973273448463	20.7537577393951	0.0347079243445677	AV4c2 (Dolan et al. eLife 2019)
826762561	138	309	309	1108	Traced	LHAV4c1_a_R	249242295	FALSE	right	LHAV4c1_a	LHAV4c1_a	LHON	ADL01	gaba	unknown	NA	NA	3.51599587203302	4	757	351	134	175	1293.63719830117	506.930833149131	457.199858324044	13.7679889755597	0.0421585026372469	AV4a4 (Dolan et al. eLife 2019); Local7 (Jeanne et al. Neuron 2018)
979519562	167	372	372	1553	Traced	LHAV4c1_a_R	353842029	TRUE	right	LHAV4c1_a	LHAV4c1_a	LHLN	ADL01	gaba	unknown	NA	NA	3.40410256410256	4	834	698	157	186	1495.65899208623	464.183852383489	466.192466678341	25.2045852213396	0.00472700977440699	AV4a4 (Dolan et al. eLife 2019)
1011616276	98	314	314	723	Traced	LHAV4c1_b_R	244356296	TRUE	right	LHAV4c1_b	LHAV4c1_b	LHON	ADL01	gaba	unknown	NA	NA	3.39419087136929	3	545	178	48	265	1357.46822442144	242.691117521903	716.560227853859	43.4657468320775	0.267159642404369	NA
705381843	291	594	594	3346	Traced	LHAV4c2_R	563372493	TRUE	right	LHAV4c2	LHAV4c2	LHON	ADL01	gaba	unknown	NA	NA	5.23316062176166	5	3087	244	77	512	1913.62786560714	450.365259900414	1000.67334630842	45.951552241745	0.495018931633439	AV4c1 (Dolan et al. eLife 2019)
766781641	208	442	442	2520	Traced	LHAV4c2_R	467694453	TRUE	right	LHAV4c2	LHAV4c2	LHON	ADL01	gaba	unknown	NA	NA	4.93796004206099	5	2403	117	185	254	1602.97322497748	607.479927874108	613.406650846034	18.7116522233206	0.277531136755716	NA
764006565	235	469	469	2715	Traced	LHAV4c2_R	468684147	TRUE	right	LHAV4c2	LHAV4c2	LHON	ADL01	gaba	unknown	NA	NA	5.21234309623431	5	2516	181	198	267	1786.25700186215	717.42557061436	623.892742052202	55.1631167032546	0.234178038454247	NA
921969630	188	367	367	2061	Traced	LHAV4c2_R	391509132	TRUE	right	LHAV4c2	LHAV4c2	LHON	ADL01	gaba	unknown	NA	NA	5.05729166666667	5	1845	216	48	318	1531.65460859605	384.848487601167	750.597986842702	13.5935654629068	0.432510931375623	NA
669171261	91	271	271	820	Traced	LHAV4d1_R	277748159	TRUE	right	LHAV4d1	LHAV4d1	LHON	ADL01	gaba	unknown	NA	NA	3.3695652173913	3	673	113	99	170	1124.23686131168	232.597811645491	476.519986736138	126.230297842115	0.188470098485016	NA
5813012083	101	471	471	936	Traced	LHAV4d1_R	419970695	TRUE	right	LHAV4d1	LHAV4d1	LHON	ADL01	gaba	unknown	NA	NA	3.45898234683281	3	752	144	157	312	1513.59781683287	330.156247832825	643.019215136544	124.296849836247	0.199885631762196	NA
511966686	90	342	342	821	Traced	LHAV4d1_R	327731480	TRUE	right	LHAV4d1	LHAV4d1	LHON	ADL01	gaba	unknown	NA	NA	3.57157569515963	3	733	88	101	241	1279.39327461445	299.51441051533	543.851626543342	100.316937095905	0.291822046214489	NA
700878295	57	234	234	534	Traced	LHAV4d1_R	287259642	TRUE	right	LHAV4d1	LHAV4d1	LHON	ADL01	gaba	unknown	NA	NA	3.19547325102881	3	427	85	71	163	1059.30218766022	180.263838553675	455.54715861778	97.5055568406869	0.216828823230307	NA
357823645	98	245	245	1025	Traced	LHAV4d1_R	297517998	TRUE	right	LHAV4d1	LHAV4d1	LHON	ADL01	gaba	unknown	NA	NA	3.15564598168871	3	809	216	99	146	1011.28060838656	283.572836479657	383.962641707681	86.6349093192984	0.105859958119191	NA
388513464	106	133	133	982	Traced	LHAV4d2_a_R	358515071	TRUE	right	LHAV4d2_a	LHAV4d2_a	LHON	ADL01	gaba	unknown	NA	NA	3.37178166838311	3	786	186	70	62	1047.23105816409	325.400967157139	222.840423449984	121.672968396667	0.055299290822505	NA
605791875	109	183	183	1054	Traced	LHAV4d2_b_R	345887383	TRUE	right	LHAV4d2_b	LHAV4d2_b	LHON	ADL01	gaba	unknown	NA	NA	3.3179012345679	3	839	207	59	116	1048.18449551877	276.862848582838	386.141819499843	52.5137927620002	0.145940209208539	NA
762957069	134	176	176	1334	Traced	LHAV4d2_b_R	361507041	TRUE	right	LHAV4d2_b	LHAV4d2_b	LHON	ADL01	gaba	unknown	NA	NA	3.17713697219361	3	990	344	62	113	1171.42748034398	304.048231515336	417.050267175488	60.0494083284521	0.0926690514365014	NA
357490931	111	223	223	987	Traced	LHAV4d3_R	433804663	TRUE	right	LHAV4d3	LHAV4d3	LHON	ADL01	gaba	unknown	NA	NA	3.21199586349535	3	775	186	84	135	1151.94938984581	364.96745136783	328.398123234743	93.5116608545378	0.128325152879226	NA
948812702	119	334	334	1164	Traced	LHAV4d3_R	431187284	TRUE	right	LHAV4d3	LHAV4d3	LHON	ADL01	gaba	unknown	NA	NA	3.47010309278351	3	930	234	114	214	1289.50664010099	355.196382324984	471.414639882354	84.789794444667	0.14730314408701	NA
5813010525	98	181	181	1080	Traced	LHAV4d4_R	242414582	TRUE	right	LHAV4d4	LHAV4d4	LHON	ADL01	gaba	unknown	NA	NA	3.14358974358974	3	721	273	108	70	955.761815895785	313.986417801055	275.337334366008	82.1261914940426	0.00982029557875874	NA
607096048	91	236	236	992	Traced	LHAV4d4_R	232686781	TRUE	right	LHAV4d4	LHAV4d4	LHON	ADL01	gaba	unknown	NA	NA	3.13874614594039	3	544	431	89	146	1047.00446170074	270.474316703451	381.898365947124	64.4587942361488	0.0205635819078352	NA
700878180	118	204	204	1094	Traced	LHAV4d5_R	248904946	TRUE	right	LHAV4d5	LHAV4d5	LHLN	ADL01	gaba	unknown	NA	NA	3.11569416498994	3	511	579	78	123	965.553840262505	270.473126673901	318.102975685852	94.406704784345	0.00403187735661559	NA
512981720	101	181	181	924	Traced	LHAV4d5_R	232908124	TRUE	right	LHAV4d5	LHAV4d5	LHLN	ADL01	gaba	unknown	NA	NA	3.12701612903226	3	496	397	76	99	914.860910656237	257.937223032006	305.833859903713	110.349143223905	0.00904475124190118	NA
512645188	65	117	117	637	Traced	LHAV4d5_R	165127510	TRUE	right	LHAV4d5	LHAV4d5	LHLN	ADL01	gaba	unknown	NA	NA	3.15361445783133	3	312	293	33	74	660.483903824435	193.949544479661	169.957622721193	180.435923872193	0.0266102540515104	NA
5812980863	115	182	182	1014	Traced	LHAV4d5_R	245255636	TRUE	right	LHAV4d5	LHAV4d5	LHLN	ADL01	gaba	unknown	NA	NA	3.0990990990991	3	328	564	34	129	912.423548409428	137.774131126487	362.112336179603	173.998383357587	0.0182693685959084	NA
730882970	196	605	605	1592	Traced	LHAV4e1_a_R	382246093	TRUE	right	LHAV4e1_a	LHAV4e1_a	LHON	ADL01	gaba	unknown	NA	NA	3.49258474576271	3	543	1000	120	469	2027.96300842655	370.511474599533	1047.65884781543	99.9074078461073	0.0183010868785756	NA
732280395	183	576	576	1449	Traced	LHAV4e1_b_R	412334959	TRUE	right	LHAV4e1_b	LHAV4e1_b	LHON	ADL01	gaba	unknown	NA	NA	3.98550724637681	4	756	674	269	299	2103.78691441662	531.571442890941	872.98531985255	121.84749915552	0.00206940385775067	NA
640221192	165	560	560	1510	Traced	LHAV4e1_b_R	431209664	TRUE	right	LHAV4e1_b	LHAV4e1_b	LHON	ADL01	gaba	unknown	NA	NA	3.84647302904564	4	865	595	274	277	1975.84347095457	486.253502295562	846.003643517308	108.574109358113	0.00621676288476414	NA
607104768	112	337	337	999	Traced	LHAV4e2_a_R	320666309	TRUE	right	LHAV4e2_a	LHAV4e2_a	LHON	ADL01	gaba	unknown	NA	NA	3.91692627206646	4	649	350	90	247	1149.06975830323	279.266451195369	582.87813333683	31.1300127574123	0.100591660439653	NA
605417133	108	338	338	888	Traced	LHAV4e2_a_R	321420521	TRUE	right	LHAV4e2_a	LHAV4e2_a	LHON	ADL01	gaba	unknown	NA	NA	3.77570093457944	4	568	320	65	273	1197.73495000225	268.859666000473	610.644511459349	34.9700907006107	0.143033026701923	NA
731244892	108	224	224	1081	Traced	LHAV4e2_a_R	309282423	TRUE	right	LHAV4e2_a	LHAV4e2_a	LHON	ADL01	gaba	unknown	NA	NA	3.76639344262295	4	713	348	57	165	1129.15297130387	287.117648761911	427.615454413663	38.6048205550387	0.110972548363364	AV4b3 (Dolan et al. eLife 2019)
638476365	95	222	222	894	Traced	LHAV4e2_a_R	299774094	TRUE	right	LHAV4e2_a	LHAV4e2_a	LHON	ADL01	gaba	unknown	NA	NA	3.96197327852004	4	577	290	57	156	991.267346869516	255.819246736925	375.170372821283	33.3119483176239	0.104205628354592	NA
700550360	81	154	154	814	Traced	LHAV4e2_b_R	272965677	TRUE	right	LHAV4e2_b	LHAV4e2_b	LHON	ADL01	gaba	unknown	NA	NA	3.21190716448032	3	604	202	61	93	987.994320894091	310.115703755433	360.743541145085	33.1883425417305	0.082918851851931	NA
762948368	97	141	141	835	Traced	LHAV4e2_b_R	231274939	TRUE	right	LHAV4e2_b	LHAV4e2_b	LHLN	ADL01	gaba	unknown	NA	NA	3.07923771313942	3	755	63	94	43	982.956598266357	376.731236897072	185.420762435557	44.4238327600321	0.0653031216866458	NA
731567967	93	194	194	981	Traced	LHAV4e2_b_R	254463160	TRUE	right	LHAV4e2_b	LHAV4e2_b	LHON	ADL01	gaba	unknown	NA	NA	3.22143579373104	3	582	333	98	91	1090.31044119166	252.210586768193	325.955005650116	30.665538805191	0.00888037338183933	NA
762263004	100	264	264	1059	Traced	LHAV4e2_b_R	260002760	TRUE	right	LHAV4e2_b	LHAV4e2_b	LHON	ADL01	gaba	unknown	NA	NA	3.27189409368635	3	752	214	93	169	976.833196952851	239.228371514058	396.346300551276	31.7850526314062	0.126965035308434	NA
731918732	87	123	123	669	Traced	LHAV4e2_b_R	243816345	TRUE	right	LHAV4e2_b	LHAV4e2_b	LHLN	ADL01	gaba	unknown	NA	NA	3.1	3	397	258	50	70	823.668248697327	185.814443978319	320.198371876964	18.0226380674645	0.0220447702804196	AV4a4 (Dolan et al. eLife 2019)
887433630	88	186	186	687	Traced	LHAV4e2_b_R	232462953	TRUE	right	LHAV4e2_b	LHAV4e2_b	LHLN	ADL01	gaba	unknown	NA	NA	3.09174311926605	3	420	254	103	79	947.524596085866	296.20625934841	245.961447549789	23.1325779732297	0.00220801610613552	AV4a4 (Dolan et al. eLife 2019)
793298641	69	144	144	768	Traced	LHAV4e3_R	232921834	TRUE	right	LHAV4e3	LHAV4e3	LHON	ADL01	gaba	unknown	NA	NA	3.39233954451346	4	638	103	65	76	931.513345374008	167.040348562413	301.779578190326	24.4622134913625	0.126163408109696	NA
699894933	71	174	174	731	Traced	LHAV4e3_R	232054656	TRUE	right	LHAV4e3	LHAV4e3	LHON	ADL01	gaba	unknown	NA	NA	3.80388151174668	4	669	28	63	111	902.716635801185	227.569053351421	350.906270339078	50.3899383148593	0.346707579579431	NA
669852092	204	650	650	1662	Traced	LHAV4e4_R	494883775	TRUE	right	LHAV4e4	LHAV4e4	LHON	ADL01	gaba	unknown	NA	NA	3.82083333333333	4	1179	457	326	317	2110.83625103377	628.387645839758	862.24567605918	66.5283621631954	0.0336805152487557	AV4b5 (Frechter et al. eLife 2019)
638136190	151	614	614	1121	Traced	LHAV4e4_R	444442753	TRUE	right	LHAV4e4	LHAV4e4	LHON	ADL01	gaba	unknown	NA	NA	3.67979274611399	4	807	314	229	382	2094.5421260898	519.22750186414	1019.46480944509	74.3898558047092	0.0871426301826097	AV4b5 (Frechter et al. eLife 2019)
700210227	116	459	459	949	Traced	LHAV4e5_R	364270244	TRUE	right	LHAV4e5	LHAV4e5	LHON	ADL01	gaba	unknown	NA	NA	4.02068252326784	4	599	291	194	247	1431.67165456125	512.634217131374	494.168913925097	17.194435991388	0.0390687592295678	NA
607787481	142	537	537	1328	Traced	LHAV4e5_R	432570438	TRUE	right	LHAV4e5	LHAV4e5	LHON	ADL01	gaba	unknown	NA	NA	4.47794871794872	4	816	463	251	259	1823.42266079805	613.614551396838	645.78629427658	12.4995317127999	0.0149068139406709	NA
5813035183	135	616	616	1089	Traced	LHAV4e5_R	373736152	TRUE	right	LHAV4e5	LHAV4e5	LHON	ADL01	gaba	unknown	NA	NA	4.04607329842932	4	405	623	167	425	1615.95095503581	303.291255612086	788.128163599666	47.9235931694876	0.00984275377291888	NA
1042572999	78	156	156	777	Traced	LHAV4e7_b_R	236743911	TRUE	right	LHAV4e7_b	LHAV4e7_b	LHON	ADL01	gaba	unknown	NA	NA	3.9825282631038	4	474	138	74	68	962.214410461009	207.053930905343	243.246129538473	6.21898003733063	0.0471451311497497	AV4b8 (Frechter et al. eLife 2019)
731919293	79	185	185	807	Traced	LHAV4e7_b_R	244814886	TRUE	right	LHAV4e7_b	LHAV4e7_b	LHON	ADL01	gaba	unknown	NA	NA	3.72981366459627	4	616	139	57	123	1022.44628125992	163.668509987451	404.393560303959	28.15074838267	0.178295596829863	AV4b8 (Dolan et al. eLife 2019)
606444098	95	174	174	961	Traced	LHAV4e7_b_R	268189497	TRUE	right	LHAV4e7_b	LHAV4e7_b	LHON	ADL01	gaba	unknown	NA	NA	3.26831785345717	4	803	143	89	82	1016.4915413346	249.075765534478	329.194255881518	19.7476309476493	0.0857330315456444	NA
1130605683	148	247	247	1592	Traced	LHAV4f1_R	332901328	TRUE	right	LHAV4f1	LHAV4f1	LHON	ADL01	gaba	unknown	NA	NA	3.30761316872428	3	1062	530	41	205	1238.96121579586	228.451932434775	614.040325279596	54.704749816454	0.156477468508475	NA
1259528984	169	257	257	1687	Traced	LHAV4f1_R	389013635	TRUE	right	LHAV4f1	LHAV4f1	LHON	ADL01	gaba	unknown	NA	NA	3.67592592592593	3	881	745	46	202	1319.40268311741	177.165688753106	711.084146476278	81.7698601946379	0.0799394616917293	NA
5901203780	149	412	412	1423	Traced	LHAV4g11_R	231159638	TRUE	right	LHAV4g11	LHAV4g11	LHON	ADL05	gaba	unknown	NA	NA	3.1774358974359	3	1020	383	279	127	1327.56917990151	661.6686225557	294.499047271375	18.593534900501	0.00126160731531977	AV4a3 (Dolan et al. eLife 2019)
947453617	191	367	367	1952	Traced	LHAV4g11_R	263393022	TRUE	right	LHAV4g11	LHAV4g11	LHLN	ADL05	gaba	unknown	NA	NA	3.1740932642487	3	739	1152	88	271	1429.852234335	306.946141966191	608.219708878953	55.8733905373487	0.0146677053454841	AV4a3 (Dolan et al. eLife 2019)
916773484	126	476	476	1215	Traced	LHAV4g11_R	223193154	TRUE	right	LHAV4g11	LHAV4g11	LHLN	ADL05	gaba	unknown	NA	NA	3.17616580310881	3	648	539	172	293	1260.09348554543	369.735445623127	475.345064136514	29.2477885066973	0.0212799127501188	AV4a3 (Dolan et al. eLife 2019); Local7 (Jeanne et al. Neuron 2018)
728483249	270	602	602	2407	Traced	LHAV4g12_R	406492723	TRUE	right	LHAV4g12	LHAV4g12	LHLN	ADL05	gaba	unknown	NA	NA	3.18762886597938	3	1061	1310	107	489	2045.61237998509	504.297642355795	1005.12657871389	28.6763887328134	0.0524600250851516	NA
727808408	243	775	775	2267	Traced	LHAV4g12_R	459554389	TRUE	right	LHAV4g12	LHAV4g12	LHLN	ADL05	gaba	unknown	NA	NA	3.31088082901554	3	1645	613	508	260	2244.78675759424	1152.16199112349	484.226709820265	46.0223021766978	0.00358936741477422	NA
852976677	266	733	733	2751	Traced	LHAV4g13_R	517164671	TRUE	right	LHAV4g13	LHAV4g13	LHLN	ADL05	gaba	unknown	NA	NA	3.34607438016529	3	1189	1553	183	542	2366.54732567516	540.350634901326	1134.97226319951	67.3844471312507	0.0231840249213197	NA
698829728	204	498	498	1871	Traced	LHAV4g13_R	467047126	TRUE	right	LHAV4g13	LHAV4g13	LHLN	ADL05	gaba	unknown	NA	NA	3.29205366357069	3	1366	505	273	220	1933.92698174072	802.514351993278	546.021454504579	38.7127308938899	0.0225085458493294	NA
668485522	244	725	725	2264	Traced	LHAV4g13_R	491011591	TRUE	right	LHAV4g13	LHAV4g13	LHLN	ADL05	gaba	unknown	NA	NA	3.40557275541796	3	1277	981	237	480	2327.1244786785	631.708479164603	1021.09871300255	49.0396471989545	0.0371229745467584	NA
5813013443	271	531	531	2914	Traced	LHAV4g14_R	464163246	TRUE	right	LHAV4g14	LHAV4g14	LHLN	ADL05	gaba	unknown	NA	NA	3.41649484536082	3	1900	926	249	256	2064.0089397232	677.505459906146	707.738515667492	70.5277926739082	0.0204512913527788	Local1 (Jeanne et al. Neuron 2018)
947103902	113	246	246	922	Traced	LHAV4g15_R	207501590	TRUE	right	LHAV4g15	LHAV4g15	LHLN	ADL05	gaba	unknown	NA	NA	3.08008213552361	3	516	386	76	164	1090.83392142349	167.399192086247	549.48409493272	7.1910092882198	0.0428219857907304	AV4a3 (Dolan et al. eLife 2019)
761232088	105	251	251	962	Traced	LHAV4g15_R	207866928	TRUE	right	LHAV4g15	LHAV4g15	LHLN	ADL05	gaba	unknown	NA	NA	3.13655030800821	3	504	297	88	120	1082.46718353052	227.994699811486	241.737111738928	64.7151566431532	0.0277990690794635	AV4a3 (Dolan et al. eLife 2019)
760902933	140	167	167	1381	Traced	LHAV4g16_b_R	310347224	TRUE	right	LHAV4g16_b	LHAV4g16_b	LHLN	ADL05	gaba	unknown	NA	NA	3.18097207859359	3	526	780	34	127	1291.75384630659	278.428900622537	546.309403091747	81.3342691100459	0.0236932904691357	NA
419548541	356	741	741	3614	Traced	LHAV4g17_R	862471542	TRUE	right	LHAV4g17	LHAV4g17	LHLN	ADL05	gaba	unknown	NA	NA	3.39669421487603	3	2300	1295	298	430	2627.5792628688	621.515550110913	1104.6927160257	113.823105519557	0.0334942310872275	NA
605723658	127	211	211	1273	Traced	LHAV4g18_R	300836963	TRUE	right	LHAV4g18	LHAV4g18	LHLN	ADL05	gaba	unknown	NA	NA	3.48024948024948	3	654	548	62	133	1229.71749507671	277.428154798644	436.700907251175	106.990828945848	0.0309361353551251	NA
946123380	148	313	313	1588	Traced	LHAV4g1_a_R	291747897	TRUE	right	LHAV4g1_a	LHAV4g1_a	LHLN	ADL05	gaba	unknown	NA	NA	3.1588785046729	3	1324	132	150	150	1205.96469214292	367.915351874972	305.634847815485	89.7529937527589	0.153355853094553	AV4a3 (Dolan et al. eLife 2019)
979857196	120	223	223	1139	Traced	LHAV4g1_a_R	256793480	TRUE	right	LHAV4g1_a	LHAV4g1_a	LHLN	ADL05	gaba	unknown	NA	NA	3.12461695607763	3	974	111	148	67	1038.23846113666	347.702647999483	192.748434027619	76.072651515423	0.0473008912698748	AV4a3 (Dolan et al. eLife 2019)
731923098	210	420	420	2300	Traced	LHAV4g1_b_R	388910701	TRUE	right	LHAV4g1_b	LHAV4g1_b	LHLN	ADL05	gaba	unknown	NA	NA	3.25435897435897	3	1453	802	140	278	1641.61754273437	396.690588145614	672.450746138826	50.0165972931959	0.0595303216922654	NA
886095820	181	386	386	1880	Traced	LHAV4g1_b_R	316910907	TRUE	right	LHAV4g1_b	LHAV4g1_b	LHLN	ADL05	gaba	unknown	NA	NA	3.24819773429454	3	1456	355	214	158	1395.01480851488	467.017653069572	393.127791554575	71.2397688656593	0.0406303205216266	NA
944055652	154	167	167	1510	Traced	LHAV4g2_R	269805895	TRUE	right	LHAV4g2	LHAV4g2	LHLN	ADL05	gaba	unknown	NA	NA	3.0921187308086	3	902	577	65	102	1301.88144507794	461.20638578297	314.379864515944	41.4901700804279	0.0274059553681281	NA
916763916	243	296	296	2359	Traced	LHAV4g2_R	400889820	TRUE	right	LHAV4g2	LHAV4g2	LHLN	ADL05	gaba	unknown	NA	NA	3.10574948665298	3	1306	1034	124	167	1661.65150259471	578.659596658856	501.076384757171	32.1851795265614	0.00989547953960368	NA
5901194039	225	260	260	2399	Traced	LHAV4g2_R	319907179	TRUE	right	LHAV4g2	LHAV4g2	LHLN	ADL05	gaba	unknown	NA	NA	3.12422360248447	3	1446	849	124	120	1635.15624083468	643.541465617147	357.803411047976	52.754181618197	0.00842897568524537	AV4a3 (Dolan et al. eLife 2019)
944729312	254	358	358	2624	Traced	LHAV4g2_R	379139159	TRUE	right	LHAV4g2	LHAV4g2	LHLN	ADL05	gaba	unknown	NA	NA	3.17323651452282	3	1072	1552	83	273	1650.87365526331	409.910394836552	673.528018352432	72.0073539678155	0.0198292328189236	AV4a3 (Dolan et al. eLife 2019)
821306235	101	270	270	757	Traced	LHAV4g3_R	215401179	TRUE	right	LHAV4g3	LHAV4g3	LHLN	ADL05	gaba	unknown	NA	NA	3.14876033057851	3	390	359	48	218	1085.23130589501	190.05861912814	510.694968129628	72.9786998724252	0.0854666836510136	AV4a5 (Frechter et al. eLife 2019)
5901193783	123	289	289	1198	Traced	LHAV4g4_a_R	269015269	TRUE	right	LHAV4g4_a	LHAV4g4_a	LHLN	ADL05	gaba	unknown	NA	NA	3.27018633540373	3	608	539	85	203	1337.36965239715	236.623742495458	628.790780954581	54.1198465310598	0.0363325299063592	NA
947462997	114	303	303	992	Traced	LHAV4g4_a_R	248361644	TRUE	right	LHAV4g4_a	LHAV4g4_a	LHLN	ADL05	gaba	unknown	NA	NA	3.32016632016632	3	649	331	127	171	1266.91989003219	316.287536724104	472.698040925257	48.7899533079732	0.0377461084158013	NA
542639377	147	329	329	1190	Traced	LHAV4g4_b_R	396987394	TRUE	right	LHAV4g4_b	LHAV4g4_b	LHLN	ADL05	gaba	unknown	NA	NA	3.24130879345603	3	844	293	168	143	1527.66558345782	502.379698247366	441.253351710867	76.9794435311742	0.0298834406439515	NA
5813009261	116	289	289	958	Traced	LHAV4g4_b_R	332038121	TRUE	right	LHAV4g4_b	LHAV4g4_b	LHLN	ADL05	gaba	unknown	NA	NA	3.17400204708291	3	730	191	115	172	1150.50176926157	265.247941617664	480.603802651435	77.0686262077623	0.113320919891763	NA
761575136	105	206	206	803	Traced	LHAV4g4_b_R	279816390	TRUE	right	LHAV4g4_b	LHAV4g4_b	LHLN	ADL05	gaba	unknown	NA	NA	3.23834196891192	3	602	143	82	119	1071.69282437786	240.453926167378	353.143612685976	90.6153081034968	0.118468361258584	NA
730537677	367	913	913	3228	Traced	LHAV4g5_R	555800234	TRUE	right	LHAV4g5	LHAV4g5	LHON	ADL05	gaba	unknown	NA	NA	3.328125	3	2145	1077	473	439	2461.84668067104	1035.64450678341	802.196912935941	21.3228296412848	0.014834977642585	NA
696772937	292	614	614	2541	Traced	LHAV4g5_R	493276341	TRUE	right	LHAV4g5	LHAV4g5	LHLN	ADL05	gaba	unknown	NA	NA	3.37981269510926	3	746	1787	129	477	1969.52259317068	308.507127983136	1056.77074274651	88.355731093515	0.00549219293899461	NA
634712940	216	392	392	1898	Traced	LHAV4g5_R	401138398	TRUE	right	LHAV4g5	LHAV4g5	LHLN	ADL05	gaba	unknown	NA	NA	3.4340206185567	3	496	1378	84	302	1597.54850651334	281.105312277722	780.529300651093	49.7584070754087	0.00185032929203099	NA
852678239	101	262	262	723	Traced	LHAV4g6_a_R	216749228	TRUE	right	LHAV4g6_a	LHAV4g6_a	LHLN	ADL05	gaba	unknown	NA	NA	3.12985685071575	3	419	283	72	184	1051.38431691469	168.335891865784	477.32019009964	91.3905540254353	0.0688821538271758	AV4a5 (Frechter et al. eLife 2019)
5813035204	127	346	346	946	Traced	LHAV4g6_a_R	285754985	TRUE	right	LHAV4g6_a	LHAV4g6_a	LHLN	ADL05	gaba	unknown	NA	NA	3.15686274509804	3	582	354	104	238	1263.92827787675	222.831213608634	609.079056894511	77.6552463189859	0.0694539561836615	NA
881986401	132	257	257	1173	Traced	LHAV4g6_b_R	285277466	TRUE	right	LHAV4g6_b	LHAV4g6_b	LHLN	ADL05	gaba	unknown	NA	NA	3.11831275720165	3	705	464	149	105	1415.90986792229	542.673985693436	401.764820078128	51.4478214348264	0.000176073160141899	NA
912663435	151	280	280	1448	Traced	LHAV4g6_b_R	255005064	TRUE	right	LHAV4g6_b	LHAV4g6_b	LHLN	ADL05	gaba	unknown	NA	NA	3.15925542916236	3	866	582	138	139	1320.65137285746	501.425655393624	400.582100540776	48.1557097361996	0.00620261508245779	NA
635385969	124	236	236	1081	Traced	LHAV4g7_a_R	242370559	TRUE	right	LHAV4g7_a	LHAV4g7_a	LHLN	ADL05	gaba	unknown	NA	NA	3.28586065573771	3	749	332	150	82	1095.29027699199	425.328765595517	270.870458770674	57.7185913138321	0.00152617078722139	AV4a5 (Frechter et al. eLife 2019)
5813035168	152	246	246	1445	Traced	LHAV4g7_a_R	222152338	TRUE	right	LHAV4g7_a	LHAV4g7_a	LHLN	ADL05	gaba	unknown	NA	NA	3.33026584867076	3	597	819	99	144	1125.74347762776	375.117791959273	295.920169865763	89.4415201687649	0.000124592180168026	NA
975072882	138	231	231	1211	Traced	LHAV4g7_a_R	240477745	TRUE	right	LHAV4g7_a	LHAV4g7_a	LHLN	ADL05	gaba	unknown	NA	NA	3.48977505112474	3	199	996	36	189	1112.45485844615	172.649455542573	533.997550903314	67.9971328521003	4.74010578047634e-05	NA
542293528	150	276	276	1221	Traced	LHAV4g7_b_R	318905803	TRUE	right	LHAV4g7_b	LHAV4g7_b	LHLN	ADL05	gaba	unknown	NA	NA	3.44513457556936	3	820	385	163	105	1184.2649468619	357.707689379287	411.161005655312	71.6022494676145	0.00361904537363678	NA
573324939	128	310	310	995	Traced	LHAV4g7_b_R	277287669	TRUE	right	LHAV4g7_b	LHAV4g7_b	LHLN	ADL05	gaba	unknown	NA	NA	3.22778345250255	3	695	219	190	112	1173.75207404243	412.310444627497	319.698070744722	84.4829287575149	0.0139073609391916	NA
761229983	148	396	396	1276	Traced	LHAV4g8_R	310764071	TRUE	right	LHAV4g8	LHAV4g8	LHLN	ADL05	gaba	unknown	NA	NA	3.16303219106957	3	763	461	206	182	1368.80770124686	453.441916131932	415.05977823589	93.8258586101438	0.00583875542140577	NA
668148078	144	346	346	1296	Traced	LHAV4g8_R	314735914	TRUE	right	LHAV4g8	LHAV4g8	LHLN	ADL05	gaba	unknown	NA	NA	3.06666666666667	3	960	325	223	105	1473.91946495056	610.819477180757	301.55748701253	71.0649303647769	0.00360136070115746	NA
666451615	146	314	314	1236	Traced	LHAV4g8_R	298180543	TRUE	right	LHAV4g8	LHAV4g8	LHLN	ADL05	gaba	unknown	NA	NA	3.15282051282051	3	679	554	144	166	1346.20526321882	314.099397248122	508.733895100225	89.4916643650583	0.00476454201754495	NA
667141710	151	334	334	1415	Traced	LHAV4g8_R	227533671	TRUE	right	LHAV4g8	LHAV4g8	LHLN	ADL05	gaba	unknown	NA	NA	3.10467479674797	3	1010	399	226	101	1266.72052764344	499.785581164211	310.10818790042	62.0497226082918	0.000503084120977215	NA
665735597	396	722	722	3585	Traced	LHAV4g9_R	728403694	TRUE	right	LHAV4g9	LHAV4g9	LHLN	ADL05	gaba	unknown	NA	NA	3.28409090909091	3	2676	896	476	237	2801.79942488911	1266.26668353428	646.373753479812	26.2768104041791	0.00507082353682053	NA
697456597	175	288	288	1268	Traced	LHAV4g9_R	322214538	TRUE	right	LHAV4g9	LHAV4g9	LHLN	ADL05	gaba	unknown	NA	NA	3.31211498973306	3	906	288	193	80	1520.5512070608	648.759116764845	232.402730710583	70.6485680584161	0.00219473373460422	NA
913013165	170	238	238	1200	Traced	LHAV4g9_R	293770093	TRUE	right	LHAV4g9	LHAV4g9	LHLN	ADL05	gaba	unknown	NA	NA	3.26304801670146	3	361	784	68	156	1315.50435905557	241.07576380366	519.34362089899	61.6125243950982	9.83506429420578e-05	NA
734667914	183	307	307	2091	Traced	LHAV4h1_R	349250409	TRUE	right	LHAV4h1	LHAV4h1	LHON	ADL05	gaba	unknown	NA	NA	4.17323651452282	4	1212	818	72	233	1674.47125454195	377.594194855037	744.758538760116	36.9772439212027	0.0790765206253097	NA
1166761119	98	129	129	876	Traced	LHAV4h1_R	264993231	TRUE	right	LHAV4h1	LHAV4h1	LHLN	ADL05	gaba	unknown	NA	NA	3.75844421699079	4	632	225	37	89	1029.80595638399	259.187376986086	371.666239903526	76.5180947590371	0.122569569054154	NA
5813090944	118	192	192	1193	Traced	LHAV4h1_R	285260012	TRUE	right	LHAV4h1	LHAV4h1	LHON	ADL05	gaba	unknown	NA	NA	3.37770897832817	4	873	283	66	122	1180.02482552389	322.066314179535	421.147325241021	39.7149828075351	0.105322533929413	NA
698180393	227	695	695	2362	Traced	LHAV4i1_R	475668842	TRUE	right	LHAV4i1	LHAV4i1	LHLN	ADL01	gaba	unknown	NA	NA	3.53073770491803	4	929	1408	121	554	1971.37713805285	246.78056265824	1092.82156424399	119.362259591843	0.0372025521007877	NA
5813133775	264	528	528	2738	Traced	LHAV4i1_R	459055751	TRUE	right	LHAV4i1	LHAV4i1	LHLN	ADL01	gaba	unknown	NA	NA	3.57651991614256	4	1378	1312	104	414	1952.09075026782	313.438954151868	1065.55599273577	81.561526203088	0.0640288645651603	NA
759586113	263	1143	1143	2633	Traced	LHAV4i2_R	701625473	TRUE	right	LHAV4i2	LHAV4i2	LHLN	ADL01	gaba	unknown	NA	NA	4.11899791231733	4	1545	1088	255	871	2640.23586001572	506.922865874019	1382.88871565223	96.4657316943355	0.0935181901272479	LV1 (Jeanne et al. Neuron 2018)
5813087621	637	1005	1005	5963	Traced	LHAV4j1_R	854929501	TRUE	right	LHAV4j1	LHAV4j1	LHON	ADL01	gaba	unknown	NA	NA	3.42901554404145	3	3289	2610	374	618	3709.46141403167	1074.4904553411	1501.22765186121	74.3407967946277	0.0196305826695572	NA
699161039	117	111	111	1145	Traced	LHAV4k1_R	275024331	TRUE	right	LHAV4k1	LHAV4k1	LHON	ADL05	gaba	unknown	NA	NA	3.55499495459132	4	827	248	37	66	1029.02282177899	269.22511935374	341.39573621565	112.144530589902	0.100535126011618	NA
697793250	157	133	133	1458	Traced	LHAV4k1_R	334842100	TRUE	right	LHAV4k1	LHAV4k1	LHON	ADL05	gaba	unknown	NA	NA	3.38445807770961	4	1173	236	31	90	1166.31949240508	321.761526553221	389.722573524218	118.497197046049	0.205555666471393	NA
634363193	118	118	118	1099	Traced	LHAV4k1_R	312586226	TRUE	right	LHAV4k1	LHAV4k1	LHON	ADL05	gaba	unknown	NA	NA	3.70503597122302	4	815	250	26	91	1131.35283151715	252.240845111623	428.181013404949	75.0373793777539	0.177679644152498	NA
699160906	148	263	263	1255	Traced	LHAV4k2_R	319679487	TRUE	right	LHAV4k2	LHAV4k2	LHON	ADL05	gaba	unknown	NA	NA	3.31524008350731	3	765	438	150	106	1431.60341464398	514.535116162502	395.720566671409	125.600634785818	0.00164586030049907	NA
5901194395	110	181	181	938	Traced	LHAV4k2_R	287588860	TRUE	right	LHAV4k2	LHAV4k2	LHON	ADL05	gaba	unknown	NA	NA	3.32955715756952	3	589	308	96	75	1164.55767949728	458.554731355462	275.229795328507	90.8134906844449	0.00589623643154169	NA
391625677	142	200	200	1319	Traced	LHAV5a1_R	264028506	TRUE	right	LHAV5a1	LHAV5a1	LHON	ADL11	unknown	unknown	NA	NA	4.41049382716049	4	1000	173	106	78	1010.14684237793	256.480364032086	309.499203128411	141.119760331967	0.0625671012164613	NA
421633905	138	192	192	1204	Traced	LHAV5a1_R	295751939	TRUE	right	LHAV5a1	LHAV5a1	LHON	ADL11	unknown	unknown	NA	NA	3.87422680412371	4	715	265	76	103	1090.12803178304	200.724575498272	434.95940974462	112.458931799113	0.0608184099161908	NA
450924155	133	208	208	1217	Traced	LHAV5a1_R	271217689	TRUE	right	LHAV5a1	LHAV5a1	LHON	ADL11	unknown	unknown	NA	NA	4.04830421377184	4	932	204	86	109	1151.93070442902	260.239604628843	432.950904804538	124.590272940351	0.103516965974853	NA
542298702	181	222	222	1519	Traced	LHAV5a1_R	308979008	TRUE	right	LHAV5a1	LHAV5a1	LHON	ADL11	unknown	unknown	NA	NA	3.99895833333333	4	1046	354	93	115	1116.82820847637	256.263992141918	392.724667418915	111.924931673387	0.0581378004211894	NA
451986590	131	152	152	1166	Traced	LHAV5a1_R	254596602	TRUE	right	LHAV5a1	LHAV5a1	LHON	ADL11	unknown	unknown	NA	NA	4.18730808597748	4	930	141	79	69	1071.7702960848	273.714837025361	300.520764012825	120.974226045183	0.0902504019654037	NA
451990898	145	212	212	1224	Traced	LHAV5a1_R	303599142	TRUE	right	LHAV5a1	LHAV5a1	LHON	ADL11	unknown	unknown	NA	NA	3.74413863404689	4	944	142	95	107	1057.77690842754	255.805270344976	357.111686046446	128.604573671853	0.127947387048645	NA
544012081	217	228	228	1676	Traced	LHAV5a10_a_R	457283504	TRUE	right	LHAV5a10_a	LHAV5a10_a	LHON	ADL11	unknown	unknown	NA	NA	3.78652849740933	4	1051	524	77	132	1510.00112301831	320.810633641723	584.515413661764	99.3999554239196	0.0528011134393375	NA
673302212	301	398	398	2579	Traced	LHAV5a10_b_R	539586580	TRUE	right	LHAV5a10_b	LHAV5a10_b	LHON	ADL11	unknown	unknown	NA	NA	3.57455683003128	4	1909	569	99	293	1911.0290438248	485.645160431134	706.604809756299	80.8969910343797	0.172426110100804	NA
419548748	152	207	207	1220	Traced	LHAV5a2_a_R	358766559	TRUE	right	LHAV5a2_a	LHAV5a2_a	LHON	ADL11	unknown	unknown	NA	NA	3.31437435367115	3	962	244	85	113	1225.59443906638	319.74468419782	369.63330767663	85.2204097346383	0.0935590023257327	NA
481941855	66	122	122	570	Traced	LHAV5a2_a_R	196068657	TRUE	right	LHAV5a2_a	LHAV5a2_a	LHON	ADL11	unknown	unknown	NA	NA	3.34226804123711	3	408	58	49	26	916.594654294959	201.673941524628	124.592223314826	67.5793276460579	0.0462997484034617	NA
483988886	65	110	110	468	Traced	LHAV5a2_a_R	247924555	TRUE	right	LHAV5a2_a	LHAV5a2_a	LHON	ADL11	unknown	unknown	NA	NA	3.29948717948718	3	282	182	44	60	938.960053624108	129.39280271184	315.632449031747	140.917991224781	0.0216804436077461	NA
419880385	66	104	104	540	Traced	LHAV5a2_a_R	218113376	TRUE	right	LHAV5a2_a	LHAV5a2_a	LHON	ADL11	unknown	unknown	NA	NA	3.02920443101712	3	334	173	27	67	908.029194886009	144.487040651969	264.188144114516	86.7228850216472	0.0864633955471339	NA
419889682	95	141	141	679	Traced	LHAV5a2_a_R	244344954	TRUE	right	LHAV5a2_a	LHAV5a2_a	LHON	ADL11	unknown	unknown	NA	NA	3.641158221303	3	653	23	62	73	1055.96842251322	357.056763935365	296.932356319445	75.1025340597797	0.277839545966786	NA
512294414	103	128	128	724	Traced	LHAV5a2_a_R	270623251	TRUE	right	LHAV5a2_a	LHAV5a2_a	LHON	ADL11	unknown	unknown	NA	NA	3.45915201654602	3	570	148	54	71	1069.59960948534	214.640074542095	340.790252507202	95.6498637331783	0.0907520831205357	NA
450579065	159	191	191	1120	Traced	LHAV5a2_a_R	407837877	TRUE	right	LHAV5a2_a	LHAV5a2_a	LHON	ADL11	unknown	unknown	NA	NA	3.16598360655738	3	942	178	72	112	1306.10354707744	319.372061477549	412.847110699976	96.6900686924545	0.145894415606023	NA
359892436	39	105	105	275	Traced	LHAV5a2_a_R	244758866	TRUE	right	LHAV5a2_a	LHAV5a2_a	LHON	ADL11	unknown	unknown	NA	NA	3.49795918367347	3	66	200	19	82	908.805468525065	116.300234340326	373.060581260638	30.062661854172	0.00353568335454502	NA
605399330	67	113	113	480	Traced	LHAV5a2_a_R	191299520	TRUE	right	LHAV5a2_a	LHAV5a2_a	LHON	ADL11	unknown	unknown	NA	NA	3.17875383043922	3	400	64	53	56	830.635353758265	194.14603950685	288.374653063874	104.905977404976	0.11619871838081	NA
449910002	48	95	95	360	Traced	LHAV5a2_a_R	236311715	TRUE	right	LHAV5a2_a	LHAV5a2_a	LHON	ADL11	unknown	unknown	NA	NA	3.1522633744856	3	168	192	20	74	852.961845863719	179.582117385388	323.432329202867	15.2926246427028	0.0456421049035277	NA
481941922	65	99	99	500	Traced	LHAV5a2_a_R	197399524	TRUE	right	LHAV5a2_a	LHAV5a2_a	LHON	ADL11	unknown	unknown	NA	NA	3.13993871297242	3	391	100	31	65	844.090819511689	130.373958195921	335.407675565473	109.610333015288	0.153361538297529	NA
5813013173	57	105	105	372	Traced	LHAV5a2_a_R	139532632	TRUE	right	LHAV5a2_a	LHAV5a2_a	LHON	ADL11	unknown	unknown	NA	NA	3.15621788283659	3	296	70	38	62	817.521117797726	159.986194609537	290.362525512386	98.8588780841012	0.134994243236152	NA
481941688	65	131	131	431	Traced	LHAV5a2_a_R	181406904	TRUE	right	LHAV5a2_a	LHAV5a2_a	LHON	ADL11	unknown	unknown	NA	NA	3.36673553719008	3	302	106	54	74	863.909262175403	189.86585499404	294.504936152313	89.4458909269931	0.0719894941616472	NA
541615798	62	128	128	369	Traced	LHAV5a2_a_R	198546328	TRUE	right	LHAV5a2_a	LHAV5a2_a	LHON	ADL11	unknown	unknown	NA	NA	3.43254376930999	3	283	63	49	79	896.198323495927	197.022783174421	324.062933495264	101.215647907682	0.144734521336345	NA
329215923	106	131	131	834	Traced	LHAV5a2_b_R	232471041	TRUE	right	LHAV5a2_b	LHAV5a2_b	LHON	ADL11	unknown	unknown	NA	NA	3.65460186142709	4	556	166	77	46	975.401826787706	255.621198489318	285.238851642533	138.710891524187	0.0154076894314203	NA
481941863	96	137	137	755	Traced	LHAV5a2_b_R	171375441	TRUE	right	LHAV5a2_b	LHAV5a2_b	LHON	ADL11	unknown	unknown	NA	NA	3.81095041322314	4	521	179	66	64	923.132888420821	197.623988127357	344.950543191733	111.326567428536	0.0382172683287161	NA
481941832	61	70	70	506	Traced	LHAV5a2_b_R	167480218	TRUE	right	LHAV5a2_b	LHAV5a2_b	LHON	ADL11	unknown	unknown	NA	NA	4.70392749244713	4	418	78	39	27	755.382898416271	121.552663846514	245.003195167118	126.099867217518	0.050166182642383	NA
5901195359	106	133	133	777	Traced	LHAV5a2_c_R	241376530	TRUE	right	LHAV5a2_c	LHAV5a2_c	LHON	ADL11	unknown	unknown	NA	NA	3.67838676318511	4	460	265	61	66	925.842505022629	229.835936452824	275.565243191147	150.022780206942	0.0147276772713852	NA
419884971	99	143	143	621	Traced	LHAV5a2_d_R	227575312	TRUE	right	LHAV5a2_d	LHAV5a2_d	LHON	ADL11	unknown	unknown	NA	NA	3.89979550102249	4	445	117	85	54	1047.86566329108	230.455264208202	357.57290514256	116.391258430224	0.0260968661944015	NA
422312019	81	154	154	734	Traced	LHAV5a3_a_R	225925985	TRUE	right	LHAV5a3_a	LHAV5a3_a	LHON	ADL11	unknown	unknown	NA	NA	3.9989701338826	4	678	14	98	55	823.638400509369	240.868930260294	221.743761066324	95.7555871826441	0.176567456609385	NA
451619287	68	100	100	558	Traced	LHAV5a3_a_R	192565087	TRUE	right	LHAV5a3_a	LHAV5a3_a	LHON	ADL11	unknown	unknown	NA	NA	3.92371134020619	4	421	65	50	47	777.283635743322	188.766900144036	218.213110575779	116.438153798039	0.102284768764222	NA
419884922	60	93	93	524	Traced	LHAV5a3_a_R	190143685	TRUE	right	LHAV5a3_a	LHAV5a3_a	LHON	ADL11	unknown	unknown	NA	NA	3.526369168357	4	393	84	39	50	735.399185436311	169.557006895761	240.176269637006	110.142533833392	0.108652484402923	NA
422312162	73	141	141	594	Traced	LHAV5a3_a_R	231050578	TRUE	right	LHAV5a3_a	LHAV5a3_a	LHON	ADL11	unknown	unknown	NA	NA	3.63032191069574	4	549	23	67	66	868.527695018489	229.268058340522	260.846308264518	120.394799067207	0.230490645436481	NA
390935535	92	132	132	633	Traced	LHAV5a3_b_R	210800035	TRUE	right	LHAV5a3_b	LHAV5a3_b	LHON	ADL11	unknown	unknown	NA	NA	3.65368852459016	4	505	75	74	48	934.184418273483	260.807315543253	239.709682643904	139.137797821231	0.0637036903632795	NA
668466304	112	180	180	734	Traced	LHAV5a3_b_R	262434493	TRUE	right	LHAV5a3_b	LHAV5a3_b	LHON	ADL11	unknown	unknown	NA	NA	3.60264227642276	4	588	121	78	94	1193.42626246004	264.304026167483	404.000186649306	119.732916185274	0.10833447126604	NA
422312023	94	117	117	690	Traced	LHAV5a3_b_R	223743089	TRUE	right	LHAV5a3_b	LHAV5a3_b	LHON	ADL11	unknown	unknown	NA	NA	3.9826353421859	4	602	68	75	36	952.983309037522	296.040092386038	236.716168633101	108.86988073059	0.0516637674861681	NA
481600824	185	284	284	1472	Traced	LHAV5a4_a_R	426217121	TRUE	right	LHAV5a4_a	LHAV5a4_a	LHON	ADL11	unknown	unknown	NA	NA	3.87757201646091	4	1028	424	125	154	1504.57005928083	477.841534216389	554.024273723009	91.5376436781852	0.0440781133896884	NA
481941611	165	261	261	1281	Traced	LHAV5a4_a_R	377042986	TRUE	right	LHAV5a4_a	LHAV5a4_a	LHON	ADL11	unknown	unknown	NA	NA	3.76215098241986	4	683	477	97	158	1326.89047850554	336.228896908898	531.861513003092	100.542119516375	0.0274371864185718	NA
360573708	117	208	208	1048	Traced	LHAV5a4_c_R	287494688	TRUE	right	LHAV5a4_c	LHAV5a4_c	LHON	ADL11	unknown	unknown	NA	NA	4.35257731958763	4	923	40	142	46	941.645157322672	348.304041695998	147.903401416702	152.671719360741	0.0678807202739992	NA
420230547	110	172	172	901	Traced	LHAV5a4_c_R	275609413	TRUE	right	LHAV5a4_c	LHAV5a4_c	LHON	ADL11	unknown	unknown	NA	NA	4.05725971370143	4	720	91	109	59	961.497633242123	331.682804425415	215.509817939149	123.695532246338	0.0570776351852409	NA
667444187	117	98	98	927	Traced	LHAV5a5_R	209774907	TRUE	right	LHAV5a5	LHAV5a5	LHON	ADL11	unknown	unknown	NA	NA	3.55498981670061	4	724	96	32	47	845.30226733735	209.40424563208	211.149982302359	163.894163382341	0.166250807147548	NA
392985492	138	128	128	1153	Traced	LHAV5a5_R	320845794	TRUE	right	LHAV5a5	LHAV5a5	LHON	ADL11	unknown	unknown	NA	NA	3.60223804679552	4	937	151	54	59	1153.07193940157	309.991180538194	334.963428005704	132.294869559983	0.107455991924881	NA
360927799	164	232	232	1471	Traced	LHAV5a5_R	317379594	TRUE	right	LHAV5a5	LHAV5a5	LHON	ADL11	unknown	unknown	NA	NA	3.46439628482972	4	1267	83	54	163	1373.37454274802	290.798906288765	603.816854443196	123.962397952563	0.392623956637725	NA
421638281	156	173	173	1478	Traced	LHAV5a5_R	325870944	TRUE	right	LHAV5a5	LHAV5a5	LHON	ADL11	unknown	unknown	NA	NA	3.65495867768595	4	1261	144	57	99	1070.11259462431	259.853339207078	364.024098805168	134.97340203889	0.213342665472906	AV5a1 (Dolan et al. eLife 2019)
5813047173	106	389	389	865	Traced	LHAV5a6_a_R	282859878	TRUE	right	LHAV5a6_a	LHAV5a6_a	LHON	ADL11	unknown	unknown	NA	NA	3.58847736625514	4	659	193	106	276	1361.05112416596	243.883517741125	568.285692317306	87.3386333630476	0.180791476096372	NA
359568205	110	376	376	897	Traced	LHAV5a6_a_R	279971414	TRUE	right	LHAV5a6_a	LHAV5a6_a	LHON	ADL11	unknown	unknown	NA	NA	4.1023784901758	4	646	182	143	206	1374.07664181581	310.930611328234	489.870891531354	133.142931118666	0.103244851300496	NA
420226410	120	155	155	894	Traced	LHAV5a6_b_R	265293598	TRUE	right	LHAV5a6_b	LHAV5a6_b	LHON	ADL11	unknown	unknown	NA	NA	3.82783505154639	4	526	283	62	75	1063.05234042289	186.381317602883	323.741790644701	123.505187059491	0.0241266837812649	NA
542298159	118	262	262	909	Traced	LHAV5a6_b_R	307235534	TRUE	right	LHAV5a6_b	LHAV5a6_b	LHON	ADL11	unknown	unknown	NA	NA	3.68302658486708	4	645	185	93	152	1240.70986981774	222.670566228954	456.353895656978	115.122145886539	0.113529561896401	NA
450574212	123	158	158	964	Traced	LHAV5a6_b_R	292779237	TRUE	right	LHAV5a6_b	LHAV5a6_b	LHON	ADL11	unknown	unknown	NA	NA	3.3464322647363	4	593	289	50	101	1098.65932792505	228.83028600114	347.313075644495	110.382921892928	0.0720535063226452	NA
511949386	40	108	108	283	Traced	LHAV5a6_b_R	193749705	TRUE	right	LHAV5a6_b	LHAV5a6_b	LHON	ADL11	unknown	unknown	NA	NA	3.28995901639344	4	206	64	10	94	791.485134228554	86.1793516485987	313.146867300558	69.2772712089172	0.334436131515244	NA
512976561	152	195	195	1204	Traced	LHAV5a7_a_R	369943829	TRUE	right	LHAV5a7_a	LHAV5a7_a	LHON	ADL11	unknown	unknown	NA	NA	3.88831437435367	4	689	514	60	121	1233.58768020965	246.884967217181	502.338186401934	99.9150794578818	0.0345681334406973	NA
451619617	168	260	260	1353	Traced	LHAV5a7_a_R	409080380	TRUE	right	LHAV5a7_a	LHAV5a7_a	LHON	ADL11	unknown	unknown	NA	NA	3.62344398340249	4	833	520	97	153	1445.97061051146	401.55409400123	498.042862045441	102.022789869847	0.0319463347498946	NA
5813010170	224	303	303	1692	Traced	LHAV5a7_c_R	373846810	TRUE	right	LHAV5a7_c	LHAV5a7_c	LHON	ADL11	unknown	unknown	NA	NA	3.7258726899384	4	1050	597	123	171	1369.37597711664	313.371370212576	520.803490115656	95.5210672514006	0.0296572551766541	NA
549961114	183	328	328	1534	Traced	LHAV5a7_c_R	308271892	TRUE	right	LHAV5a7_c	LHAV5a7_c	LHON	ADL11	unknown	unknown	NA	NA	3.89211618257261	4	1176	311	145	165	1266.47336017302	331.593898967322	436.124017638767	72.7584605570217	0.0751001833822039	NA
419543946	219	263	263	1839	Traced	LHAV5a7_c_R	349622311	TRUE	right	LHAV5a7_c	LHAV5a7_c	LHON	ADL11	unknown	unknown	NA	NA	3.82815734989648	4	1307	523	107	153	1235.805037936	321.233673178676	475.545753775463	83.9363919817815	0.0566049665244888	NA
420594200	207	269	269	1674	Traced	LHAV5a7_c_R	360618608	TRUE	right	LHAV5a7_c	LHAV5a7_c	LHON	ADL11	unknown	unknown	NA	NA	3.7888198757764	4	1027	589	103	156	1266.59627529829	292.204289283354	451.579058892147	90.6469047304982	0.0342115164752677	NA
390245740	141	171	171	1009	Traced	LHAV5a7_c_R	332961103	TRUE	right	LHAV5a7_c	LHAV5a7_c	LHON	ADL11	unknown	unknown	NA	NA	3.83196721311475	4	650	332	69	97	1048.2135436712	248.017839693346	373.516862725238	108.566865471001	0.0374648801263916	NA
452655734	221	278	278	1720	Traced	LHAV5a7_c_R	434395801	TRUE	right	LHAV5a7_c	LHAV5a7_c	LHON	ADL11	unknown	unknown	NA	NA	3.85610766045549	4	963	704	104	166	1469.72185774781	353.989218463884	560.789119468777	107.059574858853	0.0221781696999764	NA
419880519	252	492	492	1636	Traced	LHAV5a8_R	541024366	TRUE	right	LHAV5a8	LHAV5a8	LHON	ADL11	unknown	unknown	NA	NA	3.99689762150982	4	1279	343	226	258	2156.44905068714	820.636217101915	722.319315748215	104.047230627187	0.0775996523923258	NA
636451654	174	313	313	1300	Traced	LHAV5a8_R	390561518	TRUE	right	LHAV5a8	LHAV5a8	LHON	ADL11	unknown	unknown	NA	NA	3.80268595041322	4	978	301	106	206	1670.09265931341	637.488861593962	550.83290316691	88.989431609198	0.124335085691536	NA
419884905	214	382	382	1589	Traced	LHAV5a8_R	493791583	TRUE	right	LHAV5a8	LHAV5a8	LHON	ADL11	unknown	unknown	NA	NA	3.45979381443299	4	1345	240	116	266	1764.40350373867	493.626327298288	779.083410832982	86.3678877874709	0.220067014720717	NA
419889751	138	177	177	1149	Traced	LHAV5a9_a_R	306632899	TRUE	right	LHAV5a9_a	LHAV5a9_a	LHON	ADL11	unknown	unknown	NA	NA	3.64271047227926	4	998	151	63	111	1245.51171891247	408.370804430765	428.078707391871	79.0529259232331	0.189253605597896	NA
603003871	146	206	206	1188	Traced	LHAV5a9_a_R	329878632	TRUE	right	LHAV5a9_a	LHAV5a9_a	LHON	ADL11	unknown	unknown	NA	NA	3.39362795477903	4	928	204	65	122	1362.20188926684	378.637852261865	470.872212693068	99.0709988215131	0.153793605840433	NA
420235118	120	124	124	1004	Traced	LHAV5a9_b_R	207176360	TRUE	right	LHAV5a9_b	LHAV5a9_b	LHON	ADL11	unknown	unknown	NA	NA	3.87564234326824	4	917	81	45	74	1098.35471208427	362.845352262672	310.428875104014	104.324834637694	0.23721758248578	NA
541632940	136	222	222	954	Traced	LHAV5b1_R	398127889	TRUE	right	LHAV5b1	LHAV5b1	LHON	ADL11	unknown	unknown	NA	NA	3.56494845360825	4	821	133	73	146	1576.19270521523	499.948611448488	569.475195379246	63.964980244622	0.210352699003659	NA
541628695	137	237	237	953	Traced	LHAV5b1_R	411470685	TRUE	right	LHAV5b1	LHAV5b1	LHON	ADL11	unknown	unknown	NA	NA	3.73520249221184	4	765	140	66	161	1550.29394526579	345.795255750781	579.893723772734	168.229094047349	0.227220434117236	NA
360950551	322	378	378	3100	Traced	LHAV5b2_R	529638346	TRUE	right	LHAV5b2	LHAV5b2	LHON	ADL11	unknown	unknown	NA	NA	3.91719077568134	4	2233	684	161	198	2061.38765389904	515.761122894687	820.210008818239	193.070281585593	0.0641098713528606	NA
517138678	370	394	394	3492	Traced	LHAV5b2_R	511708738	TRUE	right	LHAV5b2	LHAV5b2	LHON	ADL11	unknown	unknown	NA	NA	4.05041152263374	4	2528	948	175	209	1952.88692033699	522.544548556078	795.649932472681	133.709910986932	0.0445095656290549	NA
5813047407	404	1083	1083	2911	Traced	LHAV5d1_R	831232163	TRUE	right	LHAV5d1	LHAV5d1	LHON	ADL11	unknown	unknown	NA	NA	3.41139896373057	3	2362	534	343	734	3498.40045713535	813.790889308879	1721.14990915995	61.4706704898989	0.185161915910891	AV4b5 (Frechter et al. eLife 2019)
480276374	309	425	425	2818	Traced	LHAV5e1_R	654194302	TRUE	right	LHAV5e1	LHAV5e1	LHLN	ADL07	gaba	unknown	NA	NA	3.36825726141079	3	1243	1303	164	241	2246.45983845369	505.038577476031	759.745507124748	33.651476792656	0.00414370560444999	NA
5813047255	136	320	320	908	Traced	LHAV6a10_R	383252569	TRUE	right	LHAV6a10	LHAV6a10	LHON	ADL13	acetylcholine	unknown	NA	NA	4.07419017763845	4	0	908	0	319	1474.95151959589	NA	1474.95151959589	NA	NA	NA
572988605	255	331	331	2172	Traced	LHAV6a1_a_R	438819118	TRUE	right	LHAV6a1_a	LHAV6a1_a	LHON	ADL16	unknown	unknown	NA	NA	3.45557851239669	3	1201	652	124	144	1706.47969796435	427.184013648975	520.936674236388	115.468776226475	0.0206756419632123	NA
574011220	203	403	403	1488	Traced	LHAV6a1_b_R	450077999	TRUE	right	LHAV6a1_b	LHAV6a1_b	LHON	ADL13	acetylcholine	unknown	NA	NA	3.8486096807415	4	1045	346	162	233	1735.0542982254	509.687350770451	660.29597752385	154.293396874085	0.0821231118957184	NA
360578625	246	436	436	2146	Traced	LHAV6a1_b_R	411491905	TRUE	right	LHAV6a1_b	LHAV6a1_b	LHON	ADL13	acetylcholine	unknown	NA	NA	3.43406022845275	4	1224	897	201	222	1779.22601785344	513.570595516132	713.016622468451	94.6800096862634	0.00644895979328752	NA
579562628	233	419	419	1866	Traced	LHAV6a1_b_R	488141175	TRUE	right	LHAV6a1_b	LHAV6a1_b	LHON	ADL13	acetylcholine	unknown	NA	NA	3.87395833333333	4	1407	369	125	284	1572.15560155964	311.65665090364	697.616720915566	144.712279472384	0.164547531077902	L12 (Jeanne et al. Neuron 2018)
392640591	253	381	381	1937	Traced	LHAV6a1_b_R	509816847	TRUE	right	LHAV6a1_b	LHAV6a1_b	LHON	ADL13	acetylcholine	unknown	NA	NA	3.64424057084608	4	1421	429	121	247	1666.47473441756	421.306499004547	724.105249687455	135.968631309245	0.129253502790357	NA
5813129316	163	352	352	1230	Traced	LHAV6a1_b_R	373979628	TRUE	right	LHAV6a1_b	LHAV6a1_b	LHON	ADL13	acetylcholine	unknown	NA	NA	3.63730569948187	4	739	428	97	230	1473.30840828505	283.582748701992	625.620578822258	166.379903749398	0.0753607910156139	NA
5813077898	246	356	356	1907	Traced	LHAV6a1_b_R	499258762	TRUE	right	LHAV6a1_b	LHAV6a1_b	LHON	ADL13	acetylcholine	unknown	NA	NA	3.87719298245614	4	1341	401	106	245	1504.16430814481	372.019778322979	615.457893145075	148.773155425189	0.146508906571005	L11 (Jeanne et al. Neuron 2018)
668144344	248	503	503	1819	Traced	LHAV6a1_b_R	513675827	TRUE	right	LHAV6a1_b	LHAV6a1_b	LHON	ADL13	acetylcholine	unknown	NA	NA	3.56632653061224	4	1254	483	166	324	1836.71310740816	474.355914906619	809.266472001113	134.614892801988	0.100293955506607	NA
5813009995	221	395	395	1545	Traced	LHAV6a1_b_R	451650681	TRUE	right	LHAV6a1_b	LHAV6a1_b	LHON	ADL13	acetylcholine	unknown	NA	NA	3.94432989690722	4	941	502	114	269	1416.30255039105	261.640709744016	704.529050266908	142.141895709445	0.0831184691669666	L12 (Jeanne et al. Neuron 2018)
514396940	130	145	145	878	Traced	LHAV6a2_a_R	244584135	TRUE	right	LHAV6a2_a	LHAV6a2_a	LHON	ADL13	acetylcholine	unknown	NA	NA	3.66803699897225	4	549	306	51	90	1061.97213816048	288.80469835049	365.18430273153	87.9523029189295	0.0478539333885827	L13 (Jeanne et al. Neuron 2018)
793702856	198	308	308	1492	Traced	LHAV6a2_b_R	424882203	TRUE	right	LHAV6a2_b	LHAV6a2_b	LHON	ADL13	acetylcholine	unknown	NA	NA	3.66184074457084	4	886	549	97	197	1545.78406267692	400.20937116419	622.021790937387	66.6471670421804	0.0520075559359541	L13 (Jeanne et al. Neuron 2018)
665747387	173	254	254	1252	Traced	LHAV6a2_b_R	415216100	TRUE	right	LHAV6a2_b	LHAV6a2_b	LHON	ADL13	acetylcholine	unknown	NA	NA	3.54358974358974	4	850	357	93	154	1377.84910541798	358.159406028531	490.597661844003	67.0316532258412	0.0696432200267115	NA
544007573	179	200	200	1110	Traced	LHAV6a2_c_R	301949444	TRUE	right	LHAV6a2_c	LHAV6a2_c	LHON	ADL13	acetylcholine	unknown	NA	NA	3.51393188854489	3	448	631	36	161	1417.97992649695	173.381839860452	695.462548512494	115.474941542691	0.0381121535409438	L13 (Jeanne et al. Neuron 2018)
5813010591	121	79	79	851	Traced	LHAV6a2_c_R	295818641	TRUE	right	LHAV6a2_c	LHAV6a2_c	LHON	ADL13	acetylcholine	unknown	NA	NA	3.38634046890928	3	545	273	27	50	967.354779667927	234.490580783881	321.994745593026	105.748835084806	0.0551848752023011	NA
297921527	131	338	338	716	Traced	LHAV6a3_a_R	373949033	TRUE	right	LHAV6a3_a	LHAV6a3_a	LHON	ADL13	acetylcholine	unknown	NA	NA	4.09908069458631	4	480	229	88	241	1446.29601819366	350.610028439276	671.003183651316	86.648108815932	0.119944624048618	NA
329211098	148	522	522	783	Traced	LHAV6a3_a_R	462016568	TRUE	right	LHAV6a3_a	LHAV6a3_a	LHON	ADL13	acetylcholine	unknown	NA	NA	3.81354166666667	4	401	357	121	395	1957.56076814377	314.596779723847	1036.99164219882	111.856584196186	0.0663129598150684	L11 (Jeanne et al. Neuron 2018)
454697392	120	351	351	651	Traced	LHAV6a3_a_R	353233754	TRUE	right	LHAV6a3_a	LHAV6a3_a	LHON	ADL13	acetylcholine	unknown	NA	NA	4.13092783505155	4	440	203	107	231	1576.77146021598	434.225387525615	677.540424808055	116.434303593984	0.0973252225763536	NA
360578457	201	695	695	1081	Traced	LHAV6a3_a_R	501606542	TRUE	right	LHAV6a3_a	LHAV6a3_a	LHON	ADL13	acetylcholine	unknown	NA	NA	3.90309278350515	4	479	568	265	387	2429.08864979116	721.279028922998	921.451293473966	128.132293050518	0.00188535984986049	NA
391609333	180	317	317	1253	Traced	LHAV6a3_b_R	409846970	TRUE	right	LHAV6a3_b	LHAV6a3_b	LHON	ADL13	acetylcholine	unknown	NA	NA	3.70576131687243	4	1025	205	108	199	1352.25104784673	303.245612013199	598.852687450496	130.991299257968	0.171804567059522	NA
603681826	177	323	323	1357	Traced	LHAV6a3_b_R	393966924	TRUE	right	LHAV6a3_b	LHAV6a3_b	LHON	ADL13	acetylcholine	unknown	NA	NA	3.54312114989733	4	1028	289	85	232	1500.87152627709	304.892619687382	668.582760699212	122.436017591118	0.18109417159221	NA
421957711	186	345	345	1345	Traced	LHAV6a3_b_R	425465905	TRUE	right	LHAV6a3_b	LHAV6a3_b	LHON	ADL13	acetylcholine	unknown	NA	NA	4.00101936799185	4	995	232	164	169	1365.01512847585	359.035336104471	550.824960620853	134.434740093742	0.0783658381620562	NA
423330124	188	396	396	1306	Traced	LHAV6a3_b_R	421510108	TRUE	right	LHAV6a3_b	LHAV6a3_b	LHON	ADL13	acetylcholine	unknown	NA	NA	3.58488612836439	4	884	365	84	301	1597.78247747049	259.765727244508	790.906020239408	142.590579207807	0.165888008804703	NA
453665759	58	172	172	384	Traced	LHAV6a4_R	178942784	TRUE	right	LHAV6a4	LHAV6a4	LHON	ADL13	acetylcholine	unknown	NA	NA	4.07238883143744	4	302	47	41	120	841.674024468905	149.07590577633	378.178152721851	121.425037928312	0.293180174754548	NA
422656780	171	213	213	1299	Traced	LHAV6a4_R	362694918	TRUE	right	LHAV6a4	LHAV6a4	LHON	ADL13	acetylcholine	unknown	NA	NA	3.30572597137014	4	1020	241	68	134	1258.80316401098	296.959318163972	501.732384102377	127.05671317799	0.15069100325549	NA
452664348	175	334	334	1299	Traced	LHAV6a4_R	360330950	TRUE	right	LHAV6a4	LHAV6a4	LHON	ADL13	acetylcholine	unknown	NA	NA	3.44181256436663	4	837	378	66	256	1469.0727301599	285.479854464028	703.161120318984	130.546158875227	0.158567842911501	NA
451644891	159	201	201	1032	Traced	LHAV6a5_R	333584568	TRUE	right	LHAV6a5	LHAV6a5	LHON	ADL13	acetylcholine	unknown	NA	NA	3.51901336073998	3	764	268	68	130	1155.72385118538	242.102324897967	551.418568984527	77.9605609498874	0.102987115028932	NA
482002701	145	240	240	987	Traced	LHAV6a5_R	354823654	TRUE	right	LHAV6a5	LHAV6a5	LHON	ADL13	acetylcholine	unknown	NA	NA	3.27604166666667	3	645	324	60	176	1329.49061348074	234.530827107516	660.731093324007	90.132859248464	0.111492100429058	NA
546083486	156	283	283	1047	Traced	LHAV6a5_R	404958033	TRUE	right	LHAV6a5	LHAV6a5	LHON	ADL13	acetylcholine	unknown	NA	NA	3.48603929679421	3	652	395	59	220	1655.47780673437	398.147264322157	847.366730431135	62.7090797510522	0.114099700872917	NA
422311625	127	266	266	881	Traced	LHAV6a6_R	296049399	TRUE	right	LHAV6a6	LHAV6a6	LHON	ADL13	acetylcholine	unknown	NA	NA	3.53224155578301	4	497	349	68	185	1372.61996067346	263.702488116251	631.556424375113	168.849460567966	0.0686175405486014	NA
451987038	109	125	125	737	Traced	LHAV6a6_R	277503415	TRUE	right	LHAV6a6	LHAV6a6	LHON	ADL13	acetylcholine	unknown	NA	NA	3.70533880903491	4	461	248	58	55	1053.67043869601	254.231248404435	332.478798314446	190.310843757597	0.0116047115219213	NA
451995819	219	352	352	1681	Traced	LHAV6a7_R	465666607	TRUE	right	LHAV6a7	LHAV6a7	LHON	ADL13	acetylcholine	unknown	NA	NA	3.70954356846473	4	1210	376	146	194	1593.02482356016	356.565980122137	771.53627197725	95.9045303693691	0.0767997804648333	NA
451304268	198	353	353	1536	Traced	LHAV6a7_R	371241721	TRUE	right	LHAV6a7	LHAV6a7	LHON	ADL13	acetylcholine	unknown	NA	NA	3.6047227926078	4	1304	232	139	211	1434.86583560139	299.859681318387	703.593532706677	79.0491644982963	0.155720681018148	NA
5812980880	196	342	342	1415	Traced	LHAV6a7_R	373530048	TRUE	right	LHAV6a7	LHAV6a7	LHON	ADL13	acetylcholine	unknown	NA	NA	3.69018404907975	4	1125	278	133	200	1384.90707513172	288.127180326393	684.749584834197	91.1100294664951	0.116851290101033	NA
451646040	212	355	355	1647	Traced	LHAV6a7_R	390244178	TRUE	right	LHAV6a7	LHAV6a7	LHON	ADL13	acetylcholine	unknown	NA	NA	3.55271238485159	4	1228	309	161	185	1304.63187859827	285.736180887133	586.790779491568	105.320519898779	0.0816422479825843	NA
390948580	290	452	452	2222	Traced	LHAV6b1_a_R	546226852	TRUE	right	LHAV6b1_a	LHAV6b1_a	LHON	ADL13	acetylcholine	unknown	NA	NA	3.73009307135471	4	1367	777	133	313	2084.36442889258	355.0566973709	1238.84825439345	61.026656024285	0.0731486130293323	NA
390948259	286	484	484	2199	Traced	LHAV6b1_a_R	522106493	TRUE	right	LHAV6b1_a	LHAV6b1_a	LHON	ADL13	acetylcholine	unknown	NA	NA	3.5894519131334	4	1341	835	163	318	2145.329479961	531.56559343618	1070.25831435106	59.2946642516589	0.0489774722823261	NA
511262901	239	507	507	1806	Traced	LHAV6b1_a_R	513833792	TRUE	right	LHAV6b1_a	LHAV6b1_a	LHON	ADL13	acetylcholine	unknown	NA	NA	3.87733887733888	4	1074	674	163	338	2049.76254183646	373.500250953678	1152.40837291843	94.5123014890155	0.0554296732243547	NA
452677169	316	597	597	2710	Traced	LHAV6b1_b_R	550886491	TRUE	right	LHAV6b1_b	LHAV6b1_b	LHON	ADL13	acetylcholine	unknown	NA	NA	3.51738241308793	4	1390	1316	96	498	2347.5969389212	395.927664316882	1351.25980867812	60.3656629960464	0.0859243393481079	NA
544750318	220	390	390	1743	Traced	LHAV6b1_b_R	473142329	TRUE	right	LHAV6b1_b	LHAV6b1_b	LHON	ADL13	acetylcholine	unknown	NA	NA	3.81584362139918	4	1171	510	124	260	1801.15647407928	318.755717589613	897.853432041474	70.2254256005656	0.0914189247338013	NA
514375643	314	656	656	2153	Traced	LHAV6b2_a_R	724914106	TRUE	right	LHAV6b2_a	LHAV6b2_a	LHON	ADL16	unknown	unknown	NA	NA	3.43200836820084	3	1250	857	251	381	3087.82125269093	919.174453348952	1342.47753996184	86.7414549701944	0.0254722969156925	AV4b2 (Dolan et al. eLife 2019)
5813087438	606	1371	1371	5392	Traced	LHAV6b2_a_R	946991927	TRUE	right	LHAV6b2_a	LHAV6b2_a	LHON	ADL16	unknown	unknown	NA	NA	3.24407826982492	3	2664	2689	100	1262	3929.77333372206	617.351677341619	2380.09292824376	66.9292412628066	0.142119517208219	L3 (Jeanne et al. Neuron 2018); L9 (Jeanne et al. Neuron 2018)
514713432	331	451	451	2620	Traced	LHAV6b2_a_R	477571587	TRUE	right	LHAV6b2_a	LHAV6b2_a	LHON	ADL16	unknown	unknown	NA	NA	3.73429454170958	3	1928	663	174	271	2080.28862826802	728.018368090548	779.915522209441	87.3664612579425	0.0810186639590665	AV6b1 (Dolan et al. eLife 2019)
764408961	278	395	395	2471	Traced	LHAV6b2_b_R	441251692	TRUE	right	LHAV6b2_b	LHAV6b2_b	LHON	ADL13	acetylcholine	unknown	NA	NA	3.62004175365344	4	1626	832	166	223	1845.76482741388	699.954595240543	617.82909000427	88.5401268022667	0.0337090550047247	NA
5813040095	194	454	454	1299	Traced	LHAV6b3_R	538269722	TRUE	right	LHAV6b3	LHAV6b3	LHON	ADL13	acetylcholine	unknown	NA	NA	4.02032520325203	4	1139	127	226	218	1885.98052306159	604.645405862404	742.704293977934	108.462307315728	0.142665398894613	NA
486116439	169	465	465	1048	Traced	LHAV6b3_R	578902894	TRUE	right	LHAV6b3	LHAV6b3	LHON	ADL13	acetylcholine	unknown	NA	NA	3.98541666666667	4	936	112	143	309	2149.36355912671	589.559714662171	1011.31497710934	63.275045908979	0.274558066553978	NA
420956527	197	526	526	1263	Traced	LHAV6b3_R	546766131	TRUE	right	LHAV6b3	LHAV6b3	LHON	ADL13	acetylcholine	unknown	NA	NA	4.22210743801653	4	1135	115	243	276	2017.73299922645	585.803799982786	939.087817339787	90.6723668072849	0.179145240092277	NA
573329873	182	336	336	1198	Traced	LHAV6b3_R	450128838	TRUE	right	LHAV6b3	LHAV6b3	LHON	ADL13	acetylcholine	unknown	NA	NA	4.15113871635611	4	985	173	160	145	1514.83731515739	481.192066032185	523.862676563824	133.332299483532	0.0889627477515947	L13 (Jeanne et al. Neuron 2018)
5813010494	186	464	464	1285	Traced	LHAV6b3_R	543402034	TRUE	right	LHAV6b3	LHAV6b3	LHON	ADL13	acetylcholine	unknown	NA	NA	4.03634475597092	4	1208	49	193	259	1894.66932515303	582.325253132208	775.028606843775	87.5574005375816	0.294446041609564	NA
391631218	421	914	914	2881	Traced	LHAV6b4_R	854291819	TRUE	right	LHAV6b4	LHAV6b4	LHON	ADL16	unknown	unknown	NA	NA	3.51138716356108	4	1473	1399	250	654	3126.15260228892	837.648745410374	1500.78569495456	123.914219363492	0.0385238239546487	NA
482732443	142	447	447	980	Traced	LHAV6c1_R	306185798	TRUE	right	LHAV6c1	LHAV6c1	LHON	ADL09	glutamate	unknown	NA	NA	4.72567287784679	5	433	521	60	377	1526.88487879499	211.220352621668	900.85470164312	79.7751190475241	0.083551214576744	NA
548199677	83	232	232	619	Traced	LHAV6c1_R	230502460	TRUE	right	LHAV6c1	LHAV6c1	LHON	ADL09	glutamate	unknown	NA	NA	4.07889344262295	5	456	163	63	168	972.318134921674	222.946473171946	428.152406858203	46.1473306305678	0.152833752686059	NA
544435277	127	462	462	940	Traced	LHAV6c1_R	312830680	TRUE	right	LHAV6c1	LHAV6c1	LHON	ADL09	glutamate	unknown	NA	NA	4.73498964803313	5	545	375	89	364	1407.13188678064	239.765579781647	793.874401528983	55.869246594695	0.116379607895577	NA
607212413	111	466	466	875	Traced	LHAV6c1_R	302673972	TRUE	right	LHAV6c1	LHAV6c1	LHON	ADL09	glutamate	unknown	NA	NA	4.86252545824847	5	578	275	106	356	1456.29970484605	288.864737073468	738.152782474984	78.553179463048	0.14703493639409	NA
519249805	121	502	502	1216	Traced	LHAV6d1_R	375644914	TRUE	right	LHAV6d1	LHAV6d1	LHON	ADL09	glutamate	unknown	NA	NA	5.51124744376278	5	1210	6	373	125	1606.36024046661	820.313521726706	314.776117962791	83.6880720080711	0.139668544822713	NA
5813067769	205	613	613	1970	Traced	LHAV6d1_R	398336205	TRUE	right	LHAV6d1	LHAV6d1	LHON	ADL09	glutamate	unknown	NA	NA	4.26990692864529	5	1233	600	307	256	1902.23811606157	626.533321203198	543.798618192892	18.9177630224526	0.0113989747852928	AV6c1 (Dolan et al. eLife 2019)
609587618	167	570	570	1481	Traced	LHAV6d1_R	344947080	TRUE	right	LHAV6d1	LHAV6d1	LHON	ADL09	glutamate	unknown	NA	NA	4.76519052523172	5	878	539	246	310	1826.21915672125	569.318223769303	647.82135242207	152.390456904092	0.021658663134041	NA
421646999	767	1935	1935	7208	Traced	LHAV6e1_R	1124754496	TRUE	right	LHAV6e1	LHAV6e1	LHON	AVL07	unknown	unknown	NA	NA	3.97110423116615	4	2530	4539	185	1742	5301.87584215032	555.742373448404	3563.50618448439	54.191316959631	0.0618935531642806	NA
572988717	323	483	483	2984	Traced	LHAV6f1_a_R	545896183	TRUE	right	LHAV6f1_a	LHAV6f1_a	LHON	ADL13	acetylcholine	unknown	NA	NA	3.28305785123967	3	1972	860	215	237	2053.23691219061	752.092459650496	633.21869100598	70.5639428047982	0.0307586940455993	CML2 (Jeanne et al. Neuron 2018)
696795331	242	524	524	2160	Traced	LHAV6f1_a_R	422982422	TRUE	right	LHAV6f1_a	LHAV6f1_a	LHON	ADL13	acetylcholine	unknown	NA	NA	3.24458204334365	3	1390	717	238	256	1952.90834288773	657.540737383689	588.031974011935	102.890056149182	0.0208391781218297	NA
698180486	225	560	560	1830	Traced	LHAV6f1_b_R	386445033	TRUE	right	LHAV6f1_b	LHAV6f1_b	LHON	ADL13	acetylcholine	unknown	NA	NA	3.32432432432432	3	814	943	114	432	1938.71515094096	375.724090940274	957.774473713798	92.010958647344	0.0474084574240293	CML2 (Jeanne et al. Neuron 2018)
516425902	139	277	277	1046	Traced	LHAV6f2_R	371271795	TRUE	right	LHAV6f2	LHAV6f2	LHON	ADL13	acetylcholine	unknown	NA	NA	3.7589013224822	4	726	148	104	142	1511.2998949903	317.750631777745	585.107503305278	151.764321993306	0.128002692465749	NA
425803370	173	490	490	1371	Traced	LHAV6f2_R	378456524	TRUE	right	LHAV6f2	LHAV6f2	LHON	ADL13	acetylcholine	unknown	NA	NA	3.36704900938478	4	776	568	112	365	1804.49247093264	322.745556601067	878.225768701789	93.6549614494587	0.0823744423152701	CML2 (Jeanne et al. Neuron 2018)
5813040093	103	183	183	780	Traced	LHAV6f3_a_R	278488789	TRUE	right	LHAV6f3_a	LHAV6f3_a	LHON	ADL13	acetylcholine	unknown	NA	NA	3.5067497403946	4	446	301	48	123	1140.19584848407	220.165703852272	445.623395833627	47.0914664137039	0.0645998576251816	CML1 (Jeanne et al. Neuron 2018)
483021600	141	287	287	993	Traced	LHAV6f3_b_R	354205311	TRUE	right	LHAV6f3_b	LHAV6f3_b	LHON	ADL13	acetylcholine	unknown	NA	NA	4.08847736625514	4	469	475	49	223	1307.85174784283	180.507660491893	560.24764077494	142.582778722203	0.0725683297715902	NA
702674134	92	260	260	712	Traced	LHAV6f3_c_R	310710712	TRUE	right	LHAV6f3_c	LHAV6f3_c	LHON	ADL13	acetylcholine	unknown	NA	NA	3.52886597938144	4	287	425	62	194	1382.44814949232	389.115816421036	604.21735286153	113.014142846501	0.0197189662077989	NA
5813057216	611	2392	2392	6141	Traced	LHAV6g1_R	1521311225	TRUE	right	LHAV6g1	LHAV6g1	LHON	ADL23	unknown	unknown	NA	NA	4.26875	4	3020	2870	353	2009	4793.7288864869	611.962605691947	2814.42325603034	69.3504494293793	0.102157923436648	NA
672960748	474	967	967	4696	Traced	LHAV6h1_R	1007992216	TRUE	right	LHAV6h1	LHAV6h1	LHON	ADL16	unknown	unknown	NA	NA	4.75625	5	4137	533	562	390	3637.09972762805	1378.29568953565	1051.10610451691	117.95916449349	0.0813316594119019	NA
602990602	102	273	273	782	Traced	LHAV7a1_a_R	274537584	TRUE	right	LHAV7a1_a	LHAV7a1_a	LHON	ADL19	gaba	unknown	NA	NA	3.34651404786681	3	396	386	67	201	1210.52278321328	197.953211101588	560.002362831139	100.141707631472	0.0465823564520805	NA
604722017	109	239	239	748	Traced	LHAV7a1_a_R	278044649	TRUE	right	LHAV7a1_a	LHAV7a1_a	LHON	ADL19	gaba	unknown	NA	NA	3.5562435500516	3	248	500	45	182	1195.44983381464	97.0673651311228	533.629872322445	183.251465003426	0.0147384728897072	NA
580231908	148	242	242	898	Traced	LHAV7a1_b_R	286156502	TRUE	right	LHAV7a1_b	LHAV7a1_b	LHON	ADL19	gaba	unknown	NA	NA	3.62203913491246	4	385	491	63	174	1111.2775767389	196.765371140132	447.273046502173	151.398940583531	0.0211291744593898	NA
456432557	126	330	330	944	Traced	LHAV7a1_b_R	276950493	TRUE	right	LHAV7a1_b	LHAV7a1_b	LHON	ADL19	gaba	unknown	NA	NA	3.62851196670135	4	360	570	65	249	1282.92896961777	180.931542559449	625.936070319814	148.396844241809	0.0255454115241037	NA
821625208	112	410	410	1056	Traced	LHAV7a1_b_R	268451894	TRUE	right	LHAV7a1_b	LHAV7a1_b	LHON	ADL19	gaba	unknown	NA	NA	3.58963730569948	4	559	466	155	240	1381.69303489125	301.72371583141	545.932001816947	172.644252953338	0.0159849560185868	NA
761636549	113	453	453	1079	Traced	LHAV7a2_R	253770937	TRUE	right	LHAV7a2	LHAV7a2	LHON	ADL19	gaba	unknown	NA	NA	3.82450674974039	4	361	689	79	351	1438.20018547645	131.282034039311	751.600424040267	147.077263281891	0.0222585101217074	AV7a1 (Dolan et al. eLife 2019)
452673242	112	243	243	1093	Traced	LHAV7a3_a_R	291267283	TRUE	right	LHAV7a3_a	LHAV7a3_a	LHON	ADL19	gaba	unknown	NA	NA	3.11728395061728	3	662	420	56	186	1267.91988192472	216.151737313152	600.155639688979	46.581203139534	0.0942993886731871	NA
541970375	120	299	299	1153	Traced	LHAV7a3_a_R	321350972	TRUE	right	LHAV7a3_a	LHAV7a3_a	LHON	ADL19	gaba	unknown	NA	NA	3.34507772020725	3	600	553	62	234	1445.95238144524	211.36499312138	706.702163910388	65.9406900850187	0.0665386754141029	NA
329216050	107	269	269	1010	Traced	LHAV7a3_b_R	300093495	TRUE	right	LHAV7a3_b	LHAV7a3_b	LHON	ADL19	gaba	unknown	NA	NA	3.30362694300518	3	554	456	62	206	1256.41119991993	251.16384485242	569.812640904812	54.0574967461228	0.0681630790724207	AV7a1 (Dolan et al. eLife 2019)
5813079244	110	330	330	1143	Traced	LHAV7a3_b_R	311665192	TRUE	right	LHAV7a3_b	LHAV7a3_b	LHON	ADL19	gaba	unknown	NA	NA	3.25569358178054	3	707	436	56	273	1324.06906756248	209.001459608641	651.318858129368	48.0930167837539	0.139871422095757	NA
542652400	122	362	362	885	Traced	LHAV7a4_R	308137753	TRUE	right	LHAV7a4	LHAV7a4	LHON	ADL19	gaba	unknown	NA	NA	3.69301848049281	4	384	498	100	253	1385.3338300039	203.595609401546	730.010619300228	89.0485550321372	0.0170220623876753	NA
5813010471	106	183	183	734	Traced	LHAV7a4_R	258374693	TRUE	right	LHAV7a4	LHAV7a4	LHON	ADL19	gaba	unknown	NA	NA	3.63092783505155	4	400	334	69	112	1261.25228120943	245.857909122654	549.29757084574	57.6741555924676	0.0172257157326224	NA
608534083	102	263	263	705	Traced	LHAV7a4_R	241190577	TRUE	right	LHAV7a4	LHAV7a4	LHON	ADL19	gaba	unknown	NA	NA	3.66293279022403	4	444	249	82	177	1225.85350533356	216.437901266858	594.194594027759	77.5941091246095	0.072475402324038	NA
608188506	83	169	169	583	Traced	LHAV7a4_R	249381330	TRUE	right	LHAV7a4	LHAV7a4	LHON	ADL19	gaba	unknown	NA	NA	3.56773526370217	4	418	165	51	111	1015.16866896267	204.51188949937	399.618030899128	61.7574170883578	0.109854778928366	NA
732686529	93	463	463	978	Traced	LHAV7a5_R	220647178	TRUE	right	LHAV7a5	LHAV7a5	LHON	ADL19	gaba	unknown	NA	NA	4.12167689161554	4	295	683	83	369	1274.20784430501	115.585780429186	686.775007179707	157.078800689707	0.0129747410278234	NA
791307174	121	550	550	1144	Traced	LHAV7a5_R	259457030	TRUE	right	LHAV7a5	LHAV7a5	LHON	ADL19	gaba	unknown	NA	NA	3.92886597938144	4	466	664	141	403	1483.11906493305	395.721593596276	702.038501098314	21.7045894914853	0.018193897324308	NA
853376855	91	344	344	944	Traced	LHAV7a5_R	208694301	TRUE	right	LHAV7a5	LHAV7a5	LHON	ADL19	gaba	unknown	NA	NA	3.78593588417787	4	558	350	177	158	1184.01736713886	527.762247871741	272.226549722943	50.1294155805095	0.00515098801847791	NA
609233083	132	628	628	1049	Traced	LHAV7a6_R	377091913	TRUE	right	LHAV7a6	LHAV7a6	LHON	ADL19	gaba	unknown	NA	NA	4.06839378238342	4	634	415	218	405	1876.12357955616	389.967783703339	919.346991489274	65.0072018623357	0.0463969934756148	NA
453031248	131	569	569	1026	Traced	LHAV7a7_R	321849039	TRUE	right	LHAV7a7	LHAV7a7	LHON	ADL19	gaba	unknown	NA	NA	3.87799791449426	4	422	532	143	388	1616.39055135699	269.316244180538	796.399723483383	63.9484363469163	0.0229581157857958	NA
515096130	121	541	541	922	Traced	LHAV7a7_R	323974209	TRUE	right	LHAV7a7	LHAV7a7	LHON	ADL19	gaba	unknown	NA	NA	3.88137356919875	4	335	587	105	427	1639.86221218104	222.000537882607	904.29977405387	87.5453303405851	0.0240130173329975	NA
576161592	163	697	697	1258	Traced	LHAV7b1_R	459030692	TRUE	right	LHAV7b1	LHAV7b1	LHON	AVL08	unknown	unknown	NA	NA	4.48218029350105	4	799	459	110	581	1961.599025658	302.111190440576	1055.80642035205	96.8141107344961	0.172181664979063	NA
577464071	209	840	840	1921	Traced	LHAV7b1_R	364326908	TRUE	right	LHAV7b1	LHAV7b1	LHON	AVL08	unknown	unknown	NA	NA	4.20459290187891	4	1161	747	222	609	2213.1435777624	631.348278321767	1105.17572274852	87.2335359865796	0.0825913383256128	NA
423351806	188	628	628	1721	Traced	LHAV7b1_R	339260182	TRUE	right	LHAV7b1	LHAV7b1	LHON	AVL08	unknown	unknown	NA	NA	4.33298969072165	4	1000	721	140	483	1831.7889182124	356.797191538907	861.905109132589	98.401084228065	0.0896884849113803	NA
517479202	157	507	507	1163	Traced	LHAV7b1_R	474518734	TRUE	right	LHAV7b1	LHAV7b1	LHON	AVL08	unknown	unknown	NA	NA	4.33747412008282	4	840	318	100	399	1831.76563894497	325.092548916546	885.195498549345	94.6256138772889	0.200090310231397	NA
513741732	211	907	907	1870	Traced	LHAV7b1_R	461852976	TRUE	right	LHAV7b1	LHAV7b1	LHON	AVL08	unknown	unknown	NA	NA	4.26479750778816	4	991	868	142	757	2109.39680661877	304.318662956698	1178.49936618832	98.1079217551355	0.109641347634477	NA
5813049045	170	579	579	1257	Traced	LHAV7b2_R	415194087	TRUE	right	LHAV7b2	LHAV7b2	LHON	AVL08	unknown	unknown	NA	NA	4.31639004149378	4	969	266	87	487	1931.42984315495	332.830491916537	1017.88120299921	105.969889342009	0.301493013261589	NA
636789034	274	865	865	2151	Traced	LHAV8a1_R	1365356676	TRUE	right	LHAV8a1	LHAV8a1	LHON	AVL23	unknown	unknown	NA	NA	4.18418314255983	4	1979	136	172	667	3997.7881276458	832.989373309644	2059.40899452354	319.220402937174	0.452707834606253	NA
579235017	229	597	597	2108	Traced	LHAV9a1_a_R	388971037	TRUE	right	LHAV9a1_a	LHAV9a1_a	LHON	AVM13	unknown	unknown	NA	NA	4.71368861024033	5	921	1101	136	453	1856.20190093435	437.481545938241	901.079011251159	81.1349786797861	0.0361713095403697	NA
607195856	216	590	590	1862	Traced	LHAV9a1_a_R	407303272	TRUE	right	LHAV9a1_a	LHAV9a1_a	LHON	AVM13	unknown	unknown	NA	NA	4.56494845360825	5	1078	776	166	421	1871.47985702533	476.092118771908	969.314192547655	40.0896807268097	0.0605487503034149	NA
642660081	219	459	459	1930	Traced	LHAV9a1_b_R	362222683	TRUE	right	LHAV9a1_b	LHAV9a1_b	LHON	AVM13	unknown	unknown	NA	NA	5.0977366255144	5	1073	824	138	313	1650.54859790719	479.851606442696	733.22648892385	48.3798059161013	0.0435999497125197	NA
671307834	222	514	514	1827	Traced	LHAV9a1_b_R	400519365	TRUE	right	LHAV9a1_b	LHAV9a1_b	LHON	AVM13	unknown	unknown	NA	NA	4.94026776519053	5	841	973	115	389	1796.90878965089	397.950460552462	889.732346390914	60.2723833154308	0.0393269790967152	NA
794406234	189	426	426	1749	Traced	LHAV9a1_c_R	352719944	TRUE	right	LHAV9a1_c	LHAV9a1_c	LHON	AVM13	unknown	unknown	NA	NA	5.17382413087935	5	1634	45	204	213	1499.05932739092	500.619829310724	601.188937391011	81.9212250612213	0.273178841479492	NA
953755666	241	494	494	1967	Traced	LHAV9a1_c_R	429868205	TRUE	right	LHAV9a1_c	LHAV9a1_c	LHON	AVM13	unknown	unknown	NA	NA	4.8604407135362	5	1435	483	195	291	1706.8358043012	567.138403642488	727.292212163175	70.7953686396395	0.0833112392851212	NA
793728667	215	535	535	2003	Traced	LHAV9a1_c_R	375992983	TRUE	right	LHAV9a1_c	LHAV9a1_c	LHON	AVM13	unknown	unknown	NA	NA	4.80888429752066	5	1639	286	240	281	1751.24302806467	524.026149792746	692.151299423792	180.789533309585	0.123101032403488	NA
328861282	2574	12648	12648	22449	Traced	LHCENT1_R	3918348833	TRUE	right	LHCENT1	LHCENT1	LHCENT	ADL01	gaba	unknown	NA	NA	4.23566214807091	4	8650	13790	3023	9598	17827.8870570385	4033.322613517	11048.5835986022	61.4225437705444	0.0173995360773053	NA
639585968	1881	3449	3449	14833	Traced	LHCENT11_R	2928013866	TRUE	right	LHCENT11	LHCENT11	LHCENT	ADM02	unknown	unknown	NA	NA	5.00732217573222	5	14605	153	705	2725	9978.07656436243	2666.6775073878	5563.26883448993	183.998615447745	0.607498536678617	NA
359891881	370	1101	1101	3517	Traced	LHCENT12_R	697280332	TRUE	right	LHCENT12	LHCENT12	LHCENT	PDL11	unknown	unknown	NA	NA	3.53869969040248	4	2825	678	577	508	3229.38206938737	1324.77407876407	939.851240430969	106.671496611256	0.0601576776851009	NA
5813046968	477	962	962	4812	Traced	LHCENT12_R	900184986	TRUE	right	LHCENT12	LHCENT12	LHCENT	PDL11	unknown	unknown	NA	NA	3.72124352331606	4	3858	941	266	686	3040.86201679677	814.188306318214	1457.28467365867	72.6817435070777	0.188572138880244	NA
359214479	391	1040	1040	3548	Traced	LHCENT12_R	723742862	TRUE	right	LHCENT12	LHCENT12	LHCENT	PDM30	unknown	unknown	NA	NA	3.47884416924665	4	2467	1072	473	550	3319.11787850508	1005.88585450494	1259.95104732246	63.9465369003793	0.0380194562085323	NA
608465100	155	553	553	1705	Traced	LHCENT13_a_R	516198227	TRUE	right	LHCENT13_a	LHCENT13_a	LHCENT	ADL05	gaba	unknown	NA	NA	4.61266874350987	4	735	961	48	505	1810.39630262406	221.966491429249	1137.39231161419	61.5106308367138	0.103531958892979	NA
545738451	174	585	585	1608	Traced	LHCENT13_a_R	496533802	TRUE	right	LHCENT13_a	LHCENT13_a	LHCENT	ADL05	gaba	unknown	NA	NA	4.13457556935818	4	930	678	93	490	1946.3031258496	328.425700225842	1085.53829932324	65.6981117029862	0.128627608782752	NA
576773752	165	446	446	1533	Traced	LHCENT13_a_R	490077466	TRUE	right	LHCENT13_a	LHCENT13_a	LHCENT	ADL05	gaba	unknown	NA	NA	3.7742946708464	4	951	569	106	333	1734.48909081109	298.922829125631	904.262174079428	71.4979814230355	0.0997956441475063	NA
5813012889	235	652	652	2227	Traced	LHCENT13_b_R	555905584	TRUE	right	LHCENT13_b	LHCENT13_b	LHCENT	ADL05	gaba	unknown	NA	NA	4.17835051546392	5	1185	1040	73	576	2119.67490184834	361.01267238789	1345.60177446879	61.6195455188958	0.132874745282062	NA
700884019	216	498	498	2113	Traced	LHCENT13_b_R	533219629	TRUE	right	LHCENT13_b	LHCENT13_b	LHCENT	ADL05	gaba	unknown	NA	NA	4.95693277310924	5	1040	1022	60	431	1998.65261709001	306.323974074571	1189.48784405726	43.4048304388909	0.106914352123603	NA
610601810	1032	2440	2440	11190	Traced	LHCENT14_R	2015786211	TRUE	right	LHCENT14	LHCENT14	LHCENT	PDM30	unknown	unknown	NA	NA	5.27743271221532	5	10240	598	740	1681	5671.4622299539	1170.56613242306	3380.14728421642	48.6286257110538	0.361782390710922	NA
327499164	2763	11001	11001	29445	Traced	LHCENT2_R	4343036146	TRUE	right	LHCENT2	LHCENT2	LHCENT	ADL05	gaba	unknown	NA	NA	4.23958333333333	4	5929	22799	820	10115	17640.0659000513	1286.08430025386	13105.1304107992	203.786861758231	0.0236780248429929	NA
487144598	3047	11409	11409	25895	Traced	LHCENT3_R	5121621741	TRUE	right	LHCENT3	LHCENT3	LHCENT	ADL01	gaba	unknown	NA	NA	4.4070981210856	4	9828	15488	2637	8639	17452.4026126135	3639.03869522413	11463.8342595804	50.759840001315	0.019020322236303	NA
517506265	1196	6463	6463	8871	Traced	LHCENT4_R	3347483907	TRUE	right	LHCENT4	LHCENT4	LHCENT	ADL16	unknown	unknown	NA	NA	4.50412371134021	5	8750	48	389	6048	11170.2592549695	1821.88868330544	7627.14397866039	84.9339131881079	0.817962206695566	NA
579912201	992	2977	2977	8118	Traced	LHCENT5_R	2293046695	TRUE	right	LHCENT5	LHCENT5	LHCENT	AVL01	gaba	unknown	NA	NA	4.66839916839917	5	7333	674	545	2428	5887.20567874222	1411.31998619216	3660.55652753681	146.31550452978	0.437797371213802	NA
5813068669	2073	9237	9237	21660	Traced	LHCENT6_R	3317148114	TRUE	right	LHCENT6	LHCENT6	LHCENT	ADL05	gaba	unknown	NA	NA	4.60269709543568	5	10371	11249	1863	7341	13863.4848115669	3014.12434064999	8740.50208625619	25.7231853132891	0.0585982182312892	NA
360284300	1939	1954	1954	20847	Traced	LHCENT8_R	2871904180	TRUE	right	LHCENT8	LHCENT8	LHCENT	ADL24	unknown	unknown	NA	NA	4.48229166666667	4	19300	1378	765	1162	7246.93767384923	3345.76926965378	2649.86386439387	118.609183218041	0.240823327338674	NA
511271574	2463	3274	3274	26224	Traced	LHCENT8_R	3629207899	TRUE	right	LHCENT8	LHCENT8	LHCENT	ADL24	unknown	unknown	NA	NA	4.29989550679206	4	11173	15038	312	2946	9352.69414479567	1495.67396785912	6332.91703246892	100.356126991535	0.0774222531255377	NA
330268940	2650	12341	12341	25994	Traced	LHCENT9_R	3795342961	TRUE	right	LHCENT9	LHCENT9	LHCENT	ADL05	gaba	unknown	NA	NA	4.51921079958463	5	11942	13896	3423	8850	16956.6051164088	4784.55576972907	10071.0044663371	30.0906729381317	0.0249319058415469	NA
5813020988	1310	6828	6828	10273	Traced	LHMB1_R	2272615285	TRUE	right	LHMB1	LHMB1	LHN	PDL26	unknown	unknown	NA	NA	4.11041666666667	4	7506	2725	2489	4315	9494.85380064604	2961.99161140978	5236.50915847537	138.897895515361	0.100538376657902	NA
5813035117	98	163	163	937	Traced	LHPD1a1_R	292148877	TRUE	right	LHPD1a1	LHPD1a1	LHON	PDL07	unknown	unknown	NA	NA	3.69215086646279	4	909	5	80	73	1069.10616666533	432.623165466639	299.826341907222	103.241294401094	0.324194872572735	NA
325460206	125	225	225	1203	Traced	LHPD1a1_R	219351847	FALSE	right	LHPD1a1	LHPD1a1	LHON	PDL07	unknown	unknown	NA	NA	3.54067971163749	4	914	253	76	136	1359.5036950729	365.759661178413	477.672599428174	129.524384535867	0.121524976809815	NA
325458991	125	256	256	1141	Traced	LHPD1a1_R	347609734	TRUE	right	LHPD1a1	LHPD1a1	LHON	PDL07	unknown	unknown	NA	NA	3.33231083844581	4	1137	0	64	189	1542.38890620013	485.000995091063	548.54960436354	104.208274149635	0.621035466223749	NA
5813009749	118	258	258	955	Traced	LHPD1a1_R	316649895	TRUE	right	LHPD1a1	LHPD1a1	LHON	PDL07	unknown	unknown	NA	NA	3.53347064881565	4	896	26	66	173	1478.61568680546	375.374314544082	492.302453549247	161.208822866201	0.461843664311982	NA
5813047774	425	1173	1173	4171	Traced	LHPD1b1_R	1068639947	TRUE	right	LHPD1b1	LHPD1b1	LHON	PDL06	unknown	unknown	NA	NA	3.88333333333333	4	2418	1753	222	943	4088.33673666201	643.07674150133	2340.66962259476	79.1725308779983	0.104658706786137	NA
571666434	228	619	619	1895	Traced	LHPD2a1_R	464070244	TRUE	right	LHPD2a1	LHPD2a1	LHON	PDL15	acetylcholine	unknown	NA	NA	4.0030959752322	4	1531	270	272	333	1640.26628612944	417.558276921421	793.556826888763	100.347394859805	0.130682525762113	NA
573329304	306	865	865	2844	Traced	LHPD2a1_R	489519084	TRUE	right	LHPD2a1	LHPD2a1	LHON	PDL15	acetylcholine	unknown	NA	NA	3.87448132780083	4	2134	606	284	559	2074.70877327202	440.394043997566	1124.96747009102	73.5490051048027	0.139836271646147	NA
542634516	265	737	737	2302	Traced	LHPD2a1_R	481252291	TRUE	right	LHPD2a1	LHPD2a1	LHON	PDL15	acetylcholine	unknown	NA	NA	3.63542739443872	4	1698	401	210	516	1832.10517630587	318.042383916274	1032.86519867581	107.325780768058	0.198853799781181	NA
573337611	307	766	766	2755	Traced	LHPD2a1_R	450799473	TRUE	right	LHPD2a1	LHPD2a1	LHON	PDL15	acetylcholine	unknown	NA	NA	4.00102564102564	4	2012	647	366	395	2079.36472721583	575.39922313061	1004.06970921234	73.9425530693705	0.0552565984783041	NA
640963556	180	447	447	1590	Traced	LHPD2a1_R	494542666	TRUE	right	LHPD2a1	LHPD2a1	LHON	PDL15	acetylcholine	unknown	NA	NA	4.14183673469388	4	1361	104	246	186	1416.93644833515	360.910326475204	638.10486283488	125.020230632337	0.138234770581761	PD2a2 (Frechter et al. eLife 2019) (Dolan et al. eLife 2019)
448869118	379	1072	1072	3730	Traced	LHPD2a2_R	672431405	TRUE	right	LHPD2a2	LHPD2a2	LHON	PDL15	acetylcholine	unknown	NA	NA	3.80288957688339	4	1749	1981	222	839	2864.09429267769	442.48329945301	1743.16177157529	85.9056784381038	0.0484729319696094	NA
699178922	320	974	974	2744	Traced	LHPD2a2_R	586772252	TRUE	right	LHPD2a2	LHPD2a2	LHON	PDL15	acetylcholine	unknown	NA	NA	3.54752066115702	4	1583	1058	433	519	2553.50642492233	912.742251454996	996.802070178488	136.254969173403	0.0142171859550893	NA
5813129453	304	1196	1196	2637	Traced	LHPD2a2_R	553244570	TRUE	right	LHPD2a2	LHPD2a2	LHON	PDL15	acetylcholine	unknown	NA	NA	3.584375	4	1421	1180	243	928	2962.10074434621	417.150116258784	1771.04598111056	118.415358585971	0.0850377894434313	NA
5813014640	338	1040	1040	3030	Traced	LHPD2a2_R	650993772	TRUE	right	LHPD2a2	LHPD2a2	LHON	PDL15	acetylcholine	unknown	NA	NA	3.78445595854922	4	1276	1617	201	817	2760.36885620468	376.217285510298	1604.44398625965	155.871324272207	0.045352604793088	NA
486850582	127	913	913	1297	Traced	LHPD2a3_R	429181644	TRUE	right	LHPD2a3	LHPD2a3	LHON	PDL06	unknown	unknown	NA	NA	4.51774530271399	4	1153	107	617	270	1906.72274466226	680.034696867863	715.543886501357	150.718097401948	0.0592916658416561	NA
5813099667	136	1030	1030	1392	Traced	LHPD2a3_R	473776924	TRUE	right	LHPD2a3	LHPD2a3	LHON	PDL06	unknown	unknown	NA	NA	4.44849115504683	4	1210	99	639	362	2106.86972763473	691.836433138098	837.739106774911	164.858602126069	0.0941216678454221	NA
735772860	132	756	756	1317	Traced	LHPD2a3_R	407957165	TRUE	right	LHPD2a3	LHPD2a3	LHON	PDL06	unknown	unknown	NA	NA	4.47064881565396	4	1036	253	446	297	1708.11905666465	534.866700159056	694.963346958766	115.371660736151	0.0361693201630994	NA
417834021	318	935	935	2681	Traced	LHPD2a4_a_R	551048809	TRUE	right	LHPD2a4_a	LHPD2a4_a	LHON	PDL15	acetylcholine	unknown	NA	NA	4.68262226847034	5	2017	605	270	650	2707.40554891105	763.694237067958	1264.18245205889	91.9273608934224	0.162382246404927	NA
449205611	319	749	749	2614	Traced	LHPD2a4_a_R	551798462	TRUE	right	LHPD2a4_a	LHPD2a4_a	LHON	PDL15	acetylcholine	unknown	NA	NA	4.87422680412371	5	2223	340	460	286	2494.86171031823	1249.86347921495	642.231584490894	101.701166656658	0.0595633090362516	NA
263674097	133	543	543	1075	Traced	LHPD2a5_a_R	406103337	TRUE	right	LHPD2a5_a	LHPD2a5_a	LHON	PDL06	unknown	unknown	NA	NA	4.23700623700624	4	896	132	305	219	1587.83902949356	409.275023450298	683.138526372902	131.330795367065	0.0801009084684954	NA
264014957	128	501	501	1094	Traced	LHPD2a5_a_R	412830043	TRUE	right	LHPD2a5_a	LHPD2a5_a	LHON	PDL06	unknown	unknown	NA	NA	4.129763130793	4	986	108	231	251	1615.54000048749	357.215830789281	718.51362999192	123.573193909565	0.164301277099601	PD2a2 (Frechter et al. eLife 2019)
5812980658	111	589	589	1013	Traced	LHPD2a5_b_R	320191157	TRUE	right	LHPD2a5_b	LHPD2a5_b	LHON	PDL06	unknown	unknown	NA	NA	4.11975435005118	4	949	64	326	245	1488.02547398182	433.506964143257	601.564216981401	113.476108328004	0.147754342916407	PD2a2 (Frechter et al. eLife 2019)
704078253	135	818	818	1368	Traced	LHPD2a6_R	420629243	TRUE	right	LHPD2a6	LHPD2a6	LHON	PDL06	unknown	unknown	NA	NA	3.81979166666667	4	911	455	268	536	1873.63583463368	409.920604240407	1008.22025993133	86.9650236393338	0.0803700939233657	NA
947862945	84	339	339	919	Traced	LHPD2a6_R	288012777	TRUE	right	LHPD2a6	LHPD2a6	LHON	PDL06	unknown	unknown	NA	NA	4.24380165289256	4	575	309	88	215	1216.10228150658	187.013217995336	554.728671419234	95.7273848164648	0.0889040074854828	NA
822358833	111	684	684	1216	Traced	LHPD2a6_R	390103189	TRUE	right	LHPD2a6	LHPD2a6	LHON	PDL06	unknown	unknown	NA	NA	3.84839044652129	4	752	396	257	405	1638.64022273216	449.468015219587	746.873444551046	62.229291924721	0.0511768668643618	NA
947859021	95	569	569	1001	Traced	LHPD2a6_R	347301226	TRUE	right	LHPD2a6	LHPD2a6	LHON	PDL06	unknown	unknown	NA	NA	3.87214137214137	4	632	369	226	337	1527.21652271323	437.578275683269	658.032674351253	50.5903864530114	0.0377477358387406	NA
675800901	153	525	525	1174	Traced	LHPD2a7_R	466195477	TRUE	right	LHPD2a7	LHPD2a7	LHON	PDL06	unknown	unknown	NA	NA	4.64884696016771	5	824	286	214	283	1642.93816049351	294.39748605005	863.072865986868	139.481583652014	0.0718302752051887	PD2a2 (Frechter et al. eLife 2019)
676138357	156	633	633	1227	Traced	LHPD2a7_R	484238419	TRUE	right	LHPD2a7	LHPD2a7	LHON	PDL06	unknown	unknown	NA	NA	4.66220391349125	5	1095	65	355	256	1739.25785667883	432.27646192604	801.995094100147	140.60051758933	0.15098140467267	PD2a2 (Frechter et al. eLife 2019)
704798196	158	686	686	1230	Traced	LHPD2a7_R	433220874	TRUE	right	LHPD2a7	LHPD2a7	LHON	PDL06	unknown	unknown	NA	NA	4.84511434511434	5	1150	25	418	239	1625.36159450391	483.039992284293	650.690056231998	145.35846639793	0.170398068932757	NA
695500178	104	549	549	758	Traced	LHPD2a7_R	358494549	TRUE	right	LHPD2a7	LHPD2a7	LHON	PDL06	unknown	unknown	NA	NA	4.74690082644628	5	590	85	293	240	1427.5495530052	319.032657612873	631.924856992053	184.337256010101	0.0978081225206574	NA
329254539	177	397	397	1684	Traced	LHPD2a8_R	423144898	TRUE	right	LHPD2a8	LHPD2a8	LHON	PDL06	unknown	unknown	NA	NA	4.68074150360453	4	1597	0	307	70	1275.04446841889	487.393826106098	338.342442550407	139.951194732267	0.126299160705967	NA
5813039932	168	340	340	1459	Traced	LHPD2a8_R	322996925	TRUE	right	LHPD2a8	LHPD2a8	LHON	PDL06	unknown	unknown	NA	NA	4.44181256436663	4	1224	122	249	86	1172.01075833678	377.457275227107	357.715049210959	125.634886691793	0.0347665660918104	NA
391328156	170	362	362	1549	Traced	LHPD2a8_R	339698391	TRUE	right	LHPD2a8	LHPD2a8	LHON	PDL06	unknown	unknown	NA	NA	4.33471502590674	4	1395	106	245	108	1258.65424350673	427.662641655919	394.522832546009	147.562602238847	0.0694707157728356	NA
760268555	484	1452	1452	4490	Traced	LHPD2a9_R	812622900	TRUE	right	LHPD2a9	LHPD2a9	LHON	PDL15	acetylcholine	unknown	NA	NA	3.83783783783784	4	1862	2456	257	1141	3522.60273195083	539.859975579372	2097.50936096236	87.9127867105784	0.047067775594783	NA
509928512	189	723	723	1791	Traced	LHPD2b1_a_R	547876711	TRUE	right	LHPD2b1_a	LHPD2b1_a	LHON	PDL15	acetylcholine	unknown	NA	NA	3.8875128998968	4	1675	0	373	337	1962.16904744759	560.145519092405	930.640693011359	117.322239624498	0.330684652676526	ML8 (Jeanne et al. Neuron 2018)
548872750	217	614	614	1976	Traced	LHPD2b1_a_R	497330720	TRUE	right	LHPD2b1_a	LHPD2b1_a	LHON	PDL15	acetylcholine	unknown	NA	NA	3.61099585062241	4	1874	96	194	407	1957.70236160228	466.684152532237	1018.08227250522	89.2932633379872	0.364197451213659	NA
5813089504	184	745	745	1679	Traced	LHPD2b1_a_R	515344296	TRUE	right	LHPD2b1_a	LHPD2b1_a	LHON	PDL15	acetylcholine	unknown	NA	NA	3.87100103199174	4	1634	18	315	418	1922.42606171679	499.197179648716	944.226632143013	75.6059748395374	0.363117067632617	NA
571666400	204	613	613	1868	Traced	LHPD2b1_b_R	495607839	TRUE	right	LHPD2b1_b	LHPD2b1_b	LHON	PDL15	acetylcholine	unknown	NA	NA	3.64073694984647	4	1423	445	212	397	1967.96770222554	465.91743280616	1034.65608166281	75.0081213381367	0.122019019707298	NA
356429209	450	1864	1864	3681	Traced	LHPD2c1_R	1114259902	TRUE	right	LHPD2c1	LHPD2c1	LHON	PDL15	acetylcholine	unknown	NA	NA	4.28969072164948	4	2542	1078	844	994	4215.26503630283	1433.01335046828	1824.87815462388	159.319757335218	0.0433270223652611	NA
418516266	174	244	244	1406	Traced	LHPD2c2_R	449120195	TRUE	right	LHPD2c2	LHPD2c2	LHON	PDL15	acetylcholine	unknown	NA	NA	4.61710794297352	5	1273	95	139	94	1318.85738498946	420.098182541126	440.094864444603	147.404838476229	0.119028731086367	NA
540967864	192	428	428	1425	Traced	LHPD2c2_R	468062174	TRUE	right	LHPD2c2	LHPD2c2	LHON	PDL15	acetylcholine	unknown	NA	NA	4.46812957157785	5	1181	169	227	183	1611.98348186914	427.276427424119	651.556337321043	179.619101541565	0.0939508365571609	NA
674096140	207	506	506	1705	Traced	LHPD2c2_R	541240259	TRUE	right	LHPD2c2	LHPD2c2	LHON	PDL15	acetylcholine	unknown	NA	NA	5.17956656346749	5	1503	166	302	194	1573.96707937147	485.091909153543	631.374871265025	152.558445445277	0.087189836765145	NA
703702863	202	566	566	1590	Traced	LHPD2c2_R	558771490	TRUE	right	LHPD2c2	LHPD2c2	LHON	PDL15	acetylcholine	unknown	NA	NA	4.55717255717256	5	1402	142	297	261	1936.52106544857	570.882856671846	869.419042928024	134.982003893813	0.137732974433054	NA
5813013630	72	250	250	601	Traced	LHPD2c3_R	265790733	TRUE	right	LHPD2c3	LHPD2c3	LHON	PDL06	unknown	unknown	NA	NA	4.62242798353909	5	547	1	74	154	979.776423893364	161.322129681329	438.607742145175	146.079521616487	0.504434768020657	NA
794088227	112	404	404	1143	Traced	LHPD2c3_R	305218287	TRUE	right	LHPD2c3	LHPD2c3	LHON	PDL06	unknown	unknown	NA	NA	4.84432989690722	5	1091	0	143	249	1238.89072147165	285.401813283766	583.092550052946	124.018070350115	0.483279830037169	NA
831273322	91	314	314	870	Traced	LHPD2c3_R	284917825	TRUE	right	LHPD2c3	LHPD2c3	LHON	PDL06	unknown	unknown	NA	NA	4.50565262076053	5	831	20	94	204	1049.73511855576	202.970787311221	459.587528175192	123.372280376333	0.435304417833304	NA
325743813	153	358	358	1689	Traced	LHPD2c3_R	400915680	TRUE	right	LHPD2c3	LHPD2c3	LHON	PDL06	unknown	unknown	NA	NA	4.82510288065844	5	1568	5	158	187	1158.98135154675	312.942291080724	461.723540398298	111.899585869476	0.389794896225316	NA
822358700	91	334	334	676	Traced	LHPD2c4_R	298814939	TRUE	right	LHPD2c4	LHPD2c4	LHON	PDL06	unknown	unknown	NA	NA	4.50515463917526	4	570	85	176	134	1110.72835311262	255.630579944543	374.239974128466	148.585450450156	0.0858193018034642	NA
790641825	84	390	390	634	Traced	LHPD2c4_R	296218682	TRUE	right	LHPD2c4	LHPD2c4	LHON	PDL06	unknown	unknown	NA	NA	4.34782608695652	4	466	131	110	268	1226.03752438468	227.371356856307	587.725216596787	118.379692906289	0.180606651563071	NA
644761952	176	760	760	1427	Traced	LHPD2c5_R	513488037	TRUE	right	LHPD2c5	LHPD2c5	LHON	PDL06	unknown	unknown	NA	NA	4.71149897330595	5	1304	80	440	289	1661.22441595064	451.310529270171	687.334080101848	156.799087504814	0.134714085027856	NA
642387793	139	583	583	1126	Traced	LHPD2c5_R	443287822	TRUE	right	LHPD2c5	LHPD2c5	LHON	PDL06	unknown	unknown	NA	NA	4.92924037460978	5	1045	16	319	230	1525.23870170316	386.727916405434	638.43784094119	191.918356776132	0.224597847887355	NA
947858895	77	257	257	802	Traced	LHPD2c6_R	207406328	TRUE	right	LHPD2c6	LHPD2c6	LHON	PDL06	unknown	unknown	NA	NA	4.55761316872428	4	619	183	87	154	905.687406861716	154.628197243135	391.521604415328	116.070916993381	0.12044035863725	NA
790982851	87	297	297	892	Traced	LHPD2c6_R	232812871	TRUE	right	LHPD2c6	LHPD2c6	LHON	PDL06	unknown	unknown	NA	NA	4.2625641025641	4	744	148	86	199	1079.86634632513	215.583653173416	476.908454519745	100.239681169527	0.212428488511725	NA
576502536	448	1955	1955	5193	Traced	LHPD2c7_R	1026103674	TRUE	right	LHPD2c7	LHPD2c7	LHON	PDL06	unknown	unknown	NA	NA	5.07892004153686	5	3514	1586	359	1560	4228.29380973644	733.749638697259	2619.92489023102	130.133724671458	0.180016712168179	NA
579234980	506	2064	2064	5623	Traced	LHPD2c7_R	1160151419	TRUE	right	LHPD2c7	LHPD2c7	LHON	PDL06	unknown	unknown	NA	NA	5.18265306122449	5	4367	1221	608	1429	4418.15041298517	1195.38640818227	2283.20239561671	115.068222144211	0.169387743393182	NA
392368893	569	1323	1323	7001	Traced	LHPD2d1_R	1533672444	TRUE	right	LHPD2d1	LHPD2d1	LHON	PDL06	unknown	unknown	NA	NA	4.64681724845996	5	6669	263	609	692	3859.20432278769	1280.49677640458	1676.38202422991	114.386008226341	0.260818855914519	NA
388924424	427	1165	1165	4396	Traced	LHPD2d2_R	1611568314	TRUE	right	LHPD2d2	LHPD2d2	LHON	PDL06	unknown	unknown	NA	NA	4.40434332988625	4	4154	169	439	701	3848.99340911891	1061.33236091869	1951.94385218346	119.513838916181	0.329437637217984	NA
356467849	110	358	358	1114	Traced	LHPD3a1_R	269111613	TRUE	right	LHPD3a1	LHPD3a1	LHON	PDL13	glutamate	unknown	NA	NA	3.42594484167518	4	587	527	142	211	1346.33569624391	395.418687226899	487.269501881398	6.31818757400817	0.0103474780520967	NA
386825553	119	337	337	1092	Traced	LHPD3a1_R	261350424	TRUE	right	LHPD3a1	LHPD3a1	LHON	PDL13	glutamate	unknown	NA	NA	3.74794238683128	4	501	528	157	180	1294.24415558259	374.82456016061	519.099450202768	29.439609633852	0.000294116733289163	NA
418865948	172	455	455	1680	Traced	LHPD3a1_R	300762552	TRUE	right	LHPD3a1	LHPD3a1	LHON	PDL13	glutamate	unknown	NA	NA	3.57464212678937	4	615	1034	134	319	1511.87706928852	334.499787581198	657.915190424463	60.8850619322901	0.00429943116917475	NA
417186656	171	573	573	1791	Traced	LHPD3a1_R	302955073	TRUE	right	LHPD3a1	LHPD3a1	LHON	PDL13	glutamate	unknown	NA	NA	3.58926728586171	4	1385	369	332	229	1611.84618630285	696.806644683992	426.805736911086	47.133665324709	0.031850479342045	NA
480581806	137	466	466	1506	Traced	LHPD3a1_R	293099833	TRUE	right	LHPD3a1	LHPD3a1	LHON	PDL13	glutamate	unknown	NA	NA	3.45397489539749	4	1069	437	282	175	1523.05137170851	576.065740658082	404.209617236074	6.59231394842408	0.00643870780341604	NA
479917037	170	522	522	1802	Traced	LHPD3a1_R	278756598	TRUE	right	LHPD3a1	LHPD3a1	LHON	PDL13	glutamate	unknown	NA	NA	3.47717842323651	4	1043	673	202	312	1563.66141668283	415.829430865848	664.294827328217	59.0618568941492	0.0306290503244021	NA
386821054	89	131	131	936	Traced	LHPD3a2_a_R	260170025	TRUE	right	LHPD3a2_a	LHPD3a2_a	LHON	PDL13	glutamate	unknown	NA	NA	3.4958932238193	3	790	66	59	69	882.608472530665	291.450653454547	249.359201281596	46.3839931658024	0.190845976848529	NA
480577646	107	171	171	952	Traced	LHPD3a2_b_R	297390360	TRUE	right	LHPD3a2_b	LHPD3a2_b	LHLN	PDL13	glutamate	unknown	NA	NA	3.22087132725431	3	664	288	55	113	1059.83726426351	317.286456259616	423.314216301644	38.8907722209637	0.086101607973939	NA
574364525	106	199	199	947	Traced	LHPD3a2_b_R	280051618	TRUE	right	LHPD3a2_b	LHPD3a2_b	LHLN	PDL13	glutamate	unknown	NA	NA	3.3305954825462	3	716	197	117	68	1127.19573179742	529.979296711308	245.947949975334	77.5252437749424	0.0180501904135263	NA
479917027	111	195	195	979	Traced	LHPD3a2_b_R	295998176	TRUE	right	LHPD3a2_b	LHPD3a2_b	LHLN	PDL13	glutamate	unknown	NA	NA	3.2234693877551	3	235	681	23	165	1181.99111002968	90.4699265146365	661.527178299704	59.0587676125752	0.0174837264772463	NA
511608576	96	172	172	821	Traced	LHPD3a2_c_R	280567867	TRUE	right	LHPD3a2_c	LHPD3a2_c	LHLN	PDL13	glutamate	unknown	NA	NA	3.34326824254882	3	366	408	66	99	1021.41304933922	238.56966497165	393.754473037474	35.364716925583	0.00335419777202939	NA
386821081	186	243	243	1854	Traced	LHPD3a2_c_R	331296991	TRUE	right	LHPD3a2_c	LHPD3a2_c	LHLN	PDL13	glutamate	unknown	NA	NA	3.07630522088353	3	1058	796	67	172	1353.89962655411	368.94821643012	544.017186930807	24.9800480171952	0.049167415891038	NA
480922968	147	184	184	1353	Traced	LHPD3a2_c_R	385737160	TRUE	right	LHPD3a2_c	LHPD3a2_c	LHLN	PDL13	glutamate	unknown	NA	NA	3.14488348530902	3	1036	286	88	95	1148.6158259069	463.238976182692	329.895115155355	29.3783055155931	0.0617363067478514	NA
386825636	127	365	365	1309	Traced	LHPD3a3_a_R	308879470	TRUE	right	LHPD3a3_a	LHPD3a3_a	LHLN	PDL13	glutamate	unknown	NA	NA	3.31697341513292	3	526	771	84	277	1362.93043236598	176.674717342774	665.574554132788	54.6408372571206	0.0220016995351082	NA
386825792	178	408	408	1702	Traced	LHPD3a3_b_R	431920512	TRUE	right	LHPD3a3_b	LHPD3a3_b	LHLN	PDL13	glutamate	unknown	NA	NA	3.16683518705763	3	1127	575	198	208	1833.19699644968	588.226967830409	470.271995618679	91.6308540528367	0.0201468283613514	NA
511616870	180	304	304	1684	Traced	LHPD3a3_b_R	369864989	TRUE	right	LHPD3a3_b	LHPD3a3_b	LHLN	PDL13	glutamate	unknown	NA	NA	3.11368209255533	3	883	801	86	216	1694.97485480031	410.588971735907	636.023367434319	17.0925675871809	0.0358296167053997	NA
480577749	181	304	304	1651	Traced	LHPD3a3_c_R	331084985	TRUE	right	LHPD3a3_c	LHPD3a3_c	LHLN	PDL13	glutamate	unknown	NA	NA	3.12197580645161	3	816	835	64	238	1532.31487686479	304.843947677694	690.221864168046	2.55881468388609	0.0522037283541321	NA
572650358	164	215	215	1707	Traced	LHPD3a3_c_R	295934616	TRUE	right	LHPD3a3_c	LHPD3a3_c	LHLN	PDL13	glutamate	unknown	NA	NA	3.08124373119358	3	1198	501	125	88	1395.6879538097	579.102449841381	324.108172577855	47.6218768293026	0.00888487637521551	NA
511271342	113	130	130	1323	Traced	LHPD3a4_a_R	239056576	TRUE	right	LHPD3a4_a	LHPD3a4_a	LHLN	PDL13	glutamate	unknown	NA	NA	3.102	3	1179	114	93	32	1041.16931631186	359.263533673736	174.680572427981	71.1906225667097	0.0315723289341313	NA
448225646	205	288	288	2032	Traced	LHPD3a4_b_R	319409663	TRUE	right	LHPD3a4_b	LHPD3a4_b	LHLN	PDL13	glutamate	unknown	NA	NA	3.181	3	752	1271	43	242	1594.3227913332	196.129917196486	822.82378584801	54.1408747461816	0.0352477159187129	PD3a3 (Dolan et al. eLife 2019)
5813035164	200	234	234	1902	Traced	LHPD3a4_b_R	302313165	TRUE	right	LHPD3a4_b	LHPD3a4_b	LHLN	PDL13	glutamate	unknown	NA	NA	3.17151454363089	3	1153	746	91	139	1400.82888816173	366.1365263814	502.025878393028	37.01284618881	0.0254999337808715	NA
510926056	169	190	190	1616	Traced	LHPD3a4_b_R	296463928	TRUE	right	LHPD3a4_b	LHPD3a4_b	LHLN	PDL13	glutamate	unknown	NA	NA	3.20461384152457	3	1318	298	93	95	1217.5673851812	422.576977142006	355.374164303755	11.3318730489839	0.0710531183682259	NA
356131764	169	318	318	1614	Traced	LHPD3a4_b_R	360898176	TRUE	right	LHPD3a4_b	LHPD3a4_b	LHLN	PDL13	glutamate	unknown	NA	NA	3.15261044176707	3	865	749	103	214	1579.30588579089	359.118821018552	651.533127383867	1.77614486611384	0.0278555883648216	PD3a2 (Dolan et al. eLife 2019)
480918798	103	114	114	959	Traced	LHPD3a4_c_R	200996180	TRUE	right	LHPD3a4_c	LHPD3a4_c	LHLN	PDL13	glutamate	unknown	NA	NA	3.032	3	912	27	83	29	883.242118435806	353.437410831234	141.169837373086	25.9290890463435	0.0902865429677856	NA
386825720	127	128	128	1323	Traced	LHPD3a4_c_R	226855161	TRUE	right	LHPD3a4_c	LHPD3a4_c	LHLN	PDL13	glutamate	unknown	NA	NA	3.23203285420945	3	1055	234	56	70	1114.33085427757	251.255034239225	351.109897742664	22.7143657327195	0.0918901004215009	NA
511267109	77	95	95	750	Traced	LHPD3a4_c_R	150369011	TRUE	right	LHPD3a4_c	LHPD3a4_c	LHLN	PDL13	glutamate	unknown	NA	NA	3.14904330312185	3	670	40	57	36	901.937284049502	239.718071344131	226.53932293927	70.7449827772863	0.1232654201995	NA
511267220	103	118	118	1101	Traced	LHPD3a4_c_R	189630795	TRUE	right	LHPD3a4_c	LHPD3a4_c	LHLN	PDL13	glutamate	unknown	NA	NA	3.153	3	1033	68	68	50	993.759303159265	287.514829245074	220.454709268529	52.9451305525247	0.13420979587418	NA
510934715	133	317	317	1244	Traced	LHPD3a5_R	247439961	TRUE	right	LHPD3a5	LHPD3a5	LHLN	PDL13	glutamate	unknown	NA	NA	3.25051124744376	3	958	254	182	129	1411.52998991986	506.417038914333	303.153127830159	37.9749920300724	0.0332636775056878	PD3a1 (Dolan et al. eLife 2019)
417186612	126	221	221	1164	Traced	LHPD3a5_R	246788148	TRUE	right	LHPD3a5	LHPD3a5	LHLN	PDL13	glutamate	unknown	NA	NA	3.08844221105528	3	863	280	98	121	1301.10922312796	379.299921853376	456.842446720193	36.8487823032988	0.064121574857382	NA
758178605	147	250	250	1494	Traced	LHPD3a5_R	303145618	TRUE	right	LHPD3a5	LHPD3a5	LHLN	PDL13	glutamate	unknown	NA	NA	3.0964824120603	3	402	1031	33	213	1429.13808733994	115.300213837801	792.531101479194	21.2958036713026	0.0188100260458915	NA
326137566	180	538	538	1791	Traced	LHPD3b1_a_R	373308143	TRUE	right	LHPD3b1_a	LHPD3b1_a	LHON	PDL13	glutamate	unknown	NA	NA	3.82712215320911	4	1713	71	308	213	1674.70311218368	685.238039845854	517.599098041383	32.2941555563221	0.170072194445541	NA
5812980270	205	675	675	1924	Traced	LHPD3b1_a_R	426625608	TRUE	right	LHPD3b1_a	LHPD3b1_a	LHON	PDL13	glutamate	unknown	NA	NA	3.92984293193717	4	1452	418	209	460	2027.17182951382	514.38779532876	926.006350077005	44.692610043385	0.155797052451976	NA
356486199	73	176	176	610	Traced	LHPD3b1_b_R	175842888	TRUE	right	LHPD3b1_b	LHPD3b1_b	LHON	PDL13	glutamate	unknown	NA	NA	4.10216718266254	4	352	238	80	92	1057.7069640776	323.340434654855	356.829253299599	40.0322661360059	0.0114381948148257	NA
358865451	129	362	362	1086	Traced	LHPD3b1_b_R	289413799	TRUE	right	LHPD3b1_b	LHPD3b1_b	LHON	PDL13	glutamate	unknown	NA	NA	3.28439425051335	4	584	493	60	295	1563.55892720694	256.050655418157	790.587598115189	79.3019184268895	0.10147801417604	NA
295443724	173	594	594	1451	Traced	LHPD3b2_R	380145657	TRUE	right	LHPD3b2	LHPD3b2	LHON	PDL13	glutamate	unknown	NA	NA	3.73284823284823	4	1196	162	352	231	1787.14190619798	615.665004101527	641.97174800084	66.3605674054374	0.0759295246900547	NA
294432626	163	488	488	1199	Traced	LHPD3b2_R	393866746	TRUE	right	LHPD3b2	LHPD3b2	LHON	PDL13	glutamate	unknown	NA	NA	3.62448132780083	4	1090	77	302	180	1678.12476310384	570.576050369288	548.696754507877	49.2462282256662	0.111772773386772	NA
390223560	95	395	395	980	Traced	LHPD3b3_R	275520423	TRUE	right	LHPD3b3	LHPD3b3	LHON	PDL13	glutamate	unknown	NA	NA	3.47119341563786	3	902	73	76	314	1330.35088354364	369.789930706995	642.339086037488	31.5032631235001	0.44341574577086	NA
326475920	83	221	221	860	Traced	LHPD3b3_R	244895344	TRUE	right	LHPD3b3	LHPD3b3	LHON	PDL13	glutamate	unknown	NA	NA	3.42311661506708	3	686	174	53	166	1199.29957181849	359.263454455877	507.288872486983	33.6408647813695	0.216881138423638	NA
5813011024	161	659	659	1311	Traced	LHPD3c1_R	373204842	TRUE	right	LHPD3c1	LHPD3c1	LHON	PDL13	glutamate	unknown	NA	NA	3.72268907563025	4	638	664	142	515	1928.19022993128	429.945215360459	1033.18904489562	30.2795503369813	0.0574571579077769	NA
573346248	146	372	372	1208	Traced	LHPD4a1_R	330038143	TRUE	right	LHPD4a1	LHPD4a1	LHLN	PDL11	unknown	unknown	NA	NA	3.28822314049587	3	907	284	148	213	1651.80052775199	527.833896807781	550.119476565861	80.4223046734909	0.0886457882975349	NA
573354832	103	242	242	865	Traced	LHPD4a1_R	326972117	TRUE	right	LHPD4a1	LHPD4a1	LHLN	PDL11	unknown	unknown	NA	NA	3.37913223140496	3	717	143	145	93	1328.81444108048	569.411265752577	310.724795483141	31.8171770538724	0.0439671355177936	NA
542656552	148	372	372	1179	Traced	LHPD4a1_R	323317318	TRUE	right	LHPD4a1	LHPD4a1	LHLN	PDL11	unknown	unknown	NA	NA	3.31282051282051	3	645	520	136	233	1569.943261747	350.622772749012	745.466179348263	20.1175346892244	0.0228798442646877	NA
574028395	122	267	267	1056	Traced	LHPD4a1_R	312432696	TRUE	right	LHPD4a1	LHPD4a1	LHLN	PDL11	unknown	unknown	NA	NA	3.22075279755849	3	465	570	89	167	1440.24503889003	256.842159326247	687.946264246987	77.1446902580199	0.006835828550812	NA
572650888	196	280	280	1718	Traced	LHPD4a2_R	417741095	TRUE	right	LHPD4a2	LHPD4a2	LHLN	PDL11	unknown	unknown	NA	NA	3.15741675075681	3	1324	318	182	91	1864.46171503222	782.245328362627	337.390195238811	84.2473476953568	0.0158412292342045	NA
542297875	180	346	346	1230	Traced	LHPD4a2_R	395913972	TRUE	right	LHPD4a2	LHPD4a2	LHLN	PDL11	unknown	unknown	NA	NA	3.18367346938776	3	776	418	174	168	1920.88605877713	658.079402193039	571.162498722727	58.6044574235402	0.0135229501978292	NA
5813012782	61	136	136	458	Traced	LHPD4b1_R	211344903	TRUE	right	LHPD4b1	LHPD4b1	LHON	PDL11	unknown	unknown	NA	NA	3.625	4	350	103	53	77	836.352907698515	185.971541808201	373.610157064015	66.1770687981717	0.0957513551568335	NA
607152422	54	150	150	437	Traced	LHPD4b1_R	224318687	TRUE	right	LHPD4b1	LHPD4b1	LHON	PDL11	unknown	unknown	NA	NA	3.3903192584964	4	281	144	45	95	865.115875143963	156.87127293865	380.6039328198	76.6364935624225	0.0786633462725843	NA
543053986	50	218	218	450	Traced	LHPD4b1_R	221997105	TRUE	right	LHPD4b1	LHPD4b1	LHON	PDL11	unknown	unknown	NA	NA	4.32991803278689	4	430	18	97	113	1080.62793524827	277.542723833501	446.445294529392	101.010404429472	0.262069335263019	NA
604429310	74	149	149	613	Traced	LHPD4b1_R	209474700	TRUE	right	LHPD4b1	LHPD4b1	LHON	PDL11	unknown	unknown	NA	NA	3.29557157569516	4	540	43	77	62	762.086940035877	274.676913314865	180.488836613957	35.601320395705	0.142506831366886	NA
421641859	1065	5160	5160	9638	Traced	LHPD4c1_R	2573557628	TRUE	right	LHPD4c1	LHPD4c1	LHON	PDL11	unknown	unknown	NA	NA	4	4	4886	4480	747	4400	9206.51118577387	1133.85646368622	6588.12257715197	31.8108752529333	0.114264068725563	NA
510317265	767	1702	1702	7684	Traced	LHPD4d1_R	1151936794	TRUE	right	LHPD4d1	LHPD4d1	LHLN	PDM30	unknown	unknown	NA	NA	3.36174636174636	3	4804	2820	966	723	5129.08317116476	2220.4562146051	1326.66520053533	73.0748031056837	0.00222695847266008	NA
547129228	293	553	553	2862	Traced	LHPD4d2_a_R	581931658	TRUE	right	LHPD4d2_a	LHPD4d2_a	LHON	PDM30	unknown	unknown	NA	NA	3.21319796954315	3	1269	1565	122	422	2569.89474917881	436.370246200785	1301.25429565012	3.31128791351696	0.0336402930485368	NA
574351760	373	693	693	3349	Traced	LHPD4d2_b_R	703054547	TRUE	right	LHPD4d2_b	LHPD4d2_b	LHON	PDL11	unknown	unknown	NA	NA	3.22610483042138	3	1090	2232	75	607	3295.3926037705	346.173395237609	1906.68093421905	104.018183930081	0.0415229611846117	NA
5813057881	257	461	461	2331	Traced	LHPD4d2_b_R	527788200	TRUE	right	LHPD4d2_b	LHPD4d2_b	LHON	PDL11	unknown	unknown	NA	NA	3.19613821138211	3	1565	733	200	247	2288.39567111274	825.278424888779	761.840761106796	42.7175050471896	0.0350391791318393	NA
514068564	602	2129	2129	4857	Traced	LHPD5a1_R	1568877651	TRUE	right	LHPD5a1	LHPD5a1	LHON	PDM10	unknown	unknown	NA	NA	3.71709844559585	4	4477	304	590	1509	4717.70425960031	1347.02994678169	2467.31032143132	123.34938763411	0.375523829979698	NA
327933008	761	1247	1247	6472	Traced	LHPD5b1_R	1936014452	TRUE	right	LHPD5b1	LHPD5b1	LHON	PDM11	unknown	unknown	NA	NA	4.5207468879668	5	4441	1998	719	494	4009.83653172878	1342.79559480344	1553.69071703154	228.908995105872	0.00634018721619856	NA
478613576	1131	2947	2947	7111	Traced	LHPD5c1_R	1523691776	TRUE	right	LHPD5c1	LHPD5c1	LHON	PDM30	unknown	unknown	NA	NA	3.27954779033916	3	3152	3936	1212	1701	7076.58225677809	2283.6996485292	2917.79544413328	43.0852532739442	0.000571471589344674	NA
387568523	752	3296	3296	5246	Traced	LHPD5d1_R	1385697171	TRUE	right	LHPD5d1	LHPD5d1	LHON	PDM10	unknown	unknown	NA	NA	4.55647668393782	5	3172	1945	341	2917	7270.53854589155	1191.54184316116	4737.75880612019	109.634346343699	0.21539498707403	NA
5813055800	764	4460	4460	5290	Traced	LHPD5d1_R	1469058630	TRUE	right	LHPD5d1	LHPD5d1	LHON	PDM10	unknown	unknown	NA	NA	4.49740932642487	5	3648	1627	1234	3205	8575.49685338833	2232.28225266916	5149.65936780881	126.01369438516	0.126967363083957	NA
5812980326	190	508	508	1462	Traced	LHPD5e1_R	557370843	TRUE	right	LHPD5e1	LHPD5e1	LHON	PDM10	unknown	unknown	NA	NA	4.7007299270073	5	836	505	177	291	1895.9656022956	447.775478145393	931.261394626463	171.828545840071	0.0408569448362008	NA
642409381	155	425	425	1198	Traced	LHPD5e1_R	465291664	TRUE	right	LHPD5e1	LHPD5e1	LHON	PDM10	unknown	unknown	NA	NA	4.63381742738589	5	979	193	185	226	1551.57725258942	484.544392824322	662.841200509332	96.8287180162773	0.118802533597712	NA
639275368	801	2315	2315	8131	Traced	LHPD5f1_R	1466223002	TRUE	right	LHPD5f1	LHPD5f1	LHON	PDM11	unknown	unknown	NA	NA	4.69700103412616	5	4758	3248	840	1453	5305.25202500999	1384.12077056138	2513.69756725456	39.2353410401737	0.0342596213769254	NA
387952104	195	728	728	1603	Traced	LHPV10a1_R	597493588	TRUE	right	LHPV10a1	LHPV10a1	LHON	PDM09	unknown	unknown	NA	NA	4.96704428424305	5	1539	27	516	188	1965.64258197811	830.791959754537	566.469267129786	115.596178185599	0.118302579712841	NA
451049385	215	583	583	1692	Traced	LHPV10a1_R	717107159	TRUE	right	LHPV10a1	LHPV10a1	LHON	PDM09	unknown	unknown	NA	NA	4.88923076923077	5	1564	115	381	194	1889.91533213194	661.737897742327	745.250709240604	91.2019600704657	0.0890027747007239	NA
604709727	1173	4390	4390	10396	Traced	LHPV10b1_R	1778263304	TRUE	right	LHPV10b1	LHPV10b1	LHON	PDM09	unknown	unknown	NA	NA	4	4	5978	4383	1351	3010	7877.39661031602	1529.22152286039	5052.05658524464	85.5955343831495	0.0499428173459452	NA
544361987	203	956	956	1014	Traced	LHPV10c1_R	1356076752	TRUE	right	LHPV10c1	LHPV10c1	LHON	PDM27	unknown	unknown	NA	NA	3.47995889003083	3	577	411	512	397	3241.20573157293	1397.08119982317	941.852615611419	243.684581018934	0.000317423720310406	NA
423748579	1621	5007	5007	15162	Traced	LHPV10d1_R	2073365514	TRUE	right	LHPV10d1	LHPV10d1	LHON	PDM09	unknown	unknown	NA	NA	4.59232365145228	5	7380	7736	702	4288	8294.12893710946	1472.37337658915	5539.57486373993	57.2571186263208	0.0929445214284521	NA
725701350	1655	2988	2988	15959	Traced	LHPV10d1(PDM09)_L	1878190695	TRUE	right	LHPV10d1	LHPV10d1	LHON	NA	unknown	NA	NA	NA	5.58564102564103	5	9581	6352	758	2205	5795.48375047454	1640.42676518578	3198.12300467157	132.352692467851	0.074840945476529	NA
482684855	10	458	458	42	Traced	LHPV11a1_R	483296163	TRUE	right	LHPV11a1	LHPV11a1	LHN	PDM15	unknown	unknown	NA	NA	4.31327800829875	4	12	24	111	303	1769.02262095232	243.546870281937	770.813582589014	106.417969922136	0.00272331720982855	NA
422997837	16	446	446	76	Traced	LHPV11a1_R	448703061	TRUE	right	LHPV11a1	LHPV11a1	LHN	PDM15	unknown	unknown	NA	NA	4.45341614906832	4	20	48	77	334	1710.1614152582	199.660322978225	924.076985842243	65.1700755732134	0.00973555435955897	NA
482356368	1	373	373	4	Traced	LHPV11a1_R	1013138972	TRUE	right	LHPV11a1	LHPV11a1	LHN	PDM15	unknown	unknown	NA	NA	4.18621399176955	4	0	0	31	327	1729.99200797628	48.2569627620216	976.292979329264	155.175467906498	0	NA
480590566	2977	9764	9764	26334	Traced	LHPV12a1(PVM10)_R	3779310174	FALSE	right	LHPV12a1	LHPV12a1	LHON	NA	unknown	NA	NA	NA	3.35330578512397	3	18258	7841	5762	3941	16379.2960154002	8263.55989489798	4931.64702326076	76.5970285801634	0.00838722745308229	NA
574688051	1614	1605	1605	16933	Traced	LHPV12a1_L	2139061886	FALSE	right	LHPV12a1	LHPV12a1	LHON	PVM10	unknown	unknown	NA	NA	3.31742738589212	3	13522	3123	1120	454	5180.2828876238	3319.52532540727	1029.51107917139	106.41187869822	0.00790463841820066	NA
542315097	161	410	410	1258	Traced	LHPV1c1_R	705388004	TRUE	right	LHPV1c1	LHPV1c1	LHON	PVL17	unknown	unknown	NA	NA	3.7712215320911	4	1171	81	98	292	2110.68017997344	420.254218225273	999.137328149319	112.434303929303	0.399783351374748	NA
5812981753	115	324	324	948	Traced	LHPV1c1_R	612284055	TRUE	right	LHPV1c1	LHPV1c1	LHON	PVL17	unknown	unknown	NA	NA	3.67731958762887	4	894	25	57	237	1866.69323545231	283.486579641845	887.991627130982	122.245235796908	0.556114282390656	NA
5813049105	793	1492	1492	7691	Traced	LHPV1c2_R	1560620945	TRUE	right	LHPV1c2	LHPV1c2	LHON	PVL17	unknown	unknown	NA	NA	3.82053941908714	4	3173	4497	153	1320	3939.77973064784	819.865373639497	2209.3023669989	85.3041532519139	0.0745525321661237	NA
1006146837	718	1622	1622	8030	Traced	LHPV1d1_R	972799157	TRUE	right	LHPV1d1	LHPV1d1	LHON	PVL02	unknown	unknown	NA	NA	4.90625	5	3414	4522	362	1253	4221.2461692103	785.730806525791	2404.59099939008	63.5780249800999	0.0292440144921441	NA
724820565	274	497	497	2965	Traced	LHPV2a1_a_R	448284253	TRUE	right	LHPV2a1_a	LHPV2a1_a	LHON	PVL03	gaba	unknown	NA	NA	3.92753623188406	4	1826	996	182	304	1550.87670560554	326.480094627115	657.600676381748	105.047293692162	0.0456394996706633	NA
822009511	296	521	521	3111	Traced	LHPV2a1_a_R	492454708	TRUE	right	LHPV2a1_a	LHPV2a1_a	LHON	PVL03	gaba	unknown	NA	NA	3.98964803312629	4	2027	1068	221	294	1579.75487217477	416.256116201993	653.873592407245	32.3940429669423	0.0313650186314963	NA
822684007	154	635	635	1256	Traced	LHPV2a1_b_R	404940094	TRUE	right	LHPV2a1_b	LHPV2a1_b	LHON	PVL03	gaba	unknown	NA	NA	3.81172839506173	4	552	700	202	420	1724.25169463826	324.655933525478	891.261083555272	80.7029079048692	0.00992681009835961	NA
886130319	381	795	795	4405	Traced	LHPV2a1_c_R	655415143	TRUE	right	LHPV2a1_c	LHPV2a1_c	LHLN	PVL03	gaba	unknown	NA	NA	3.86452947259566	4	3500	854	325	451	2060.94035663101	729.993460770986	708.846043072636	45.8262734042316	0.103851673159581	NA
5813014218	263	627	627	2536	Traced	LHPV2a1_c_R	417012080	TRUE	right	LHPV2a1_c	LHPV2a1_c	LHLN	PVL03	gaba	unknown	NA	NA	3.78828365878726	4	665	1803	109	495	1614.85906949789	257.502024377872	814.092528077603	66.1570552217206	0.00707949737050906	NA
5813041244	333	777	777	3483	Traced	LHPV2a1_c_R	555727173	TRUE	right	LHPV2a1_c	LHPV2a1_c	LHLN	PVL03	gaba	unknown	NA	NA	3.60688216892596	4	932	2493	175	579	1903.8829520762	278.23770000618	1063.83324314557	44.5366549181083	0.00131714426556928	NA
758903321	420	1154	1154	4962	Traced	LHPV2a1_d_R	751040103	TRUE	right	LHPV2a1_d	LHPV2a1_d	LHON	PVL03	gaba	unknown	NA	NA	4.00723140495868	4	3091	1858	368	771	2701.81406486048	736.172084304224	1263.83526123433	13.8756251582851	0.0583902243736292	NA
822005494	394	888	888	4737	Traced	LHPV2a1_d_R	703596912	TRUE	right	LHPV2a1_d	LHPV2a1_d	LHLN	PVL03	gaba	unknown	NA	NA	3.90881147540984	4	3410	1220	391	488	2281.87436986876	824.237168774228	856.797425462271	34.0729225658614	0.0565854892427227	NA
5813090530	529	1301	1301	5621	Traced	LHPV2a1_e_R	934751678	TRUE	right	LHPV2a1_e	LHPV2a1_e	LHON	PVL03	gaba	unknown	NA	NA	3.97830578512397	4	3844	1767	779	498	3164.68391711801	1380.05923495942	873.41539789545	38.7170149267897	0.00393522494166609	PV2b1 (Dolan et al. eLife 2019)
853717974	670	2011	2011	6954	Traced	LHPV2a1_e_R	1183966952	TRUE	right	LHPV2a1_e	LHPV2a1_e	LHON	PVL03	gaba	unknown	NA	NA	3.93665628245068	4	5278	1676	1117	852	4346.41216833737	1937.85853391012	1302.67107094826	45.4415910975369	0.0278977281295609	PV2b1 (Dolan et al. eLife 2019)
791311618	168	349	349	1487	Traced	LHPV2a2_R	314018407	TRUE	right	LHPV2a2	LHPV2a2	LHLN	PVL03	gaba	unknown	NA	NA	3.61349693251534	4	510	977	66	274	1158.84231476843	167.389258989256	559.621128903011	64.3349440948481	0.0173531153022715	NA
912045178	248	528	528	2279	Traced	LHPV2a2_R	401470479	TRUE	right	LHPV2a2	LHPV2a2	LHLN	PVL03	gaba	unknown	NA	NA	3.59198355601233	4	1752	470	371	143	1432.09292649475	694.16029547603	313.044413696842	66.7209815742477	0.00388416650186851	NA
789934899	166	773	773	1571	Traced	LHPV2a3_R	377278320	TRUE	right	LHPV2a3	LHPV2a3	LHLN	PVL03	gaba	unknown	NA	NA	3.40599173553719	3	557	1002	194	572	1755.68917375141	271.006116182667	1032.01002626285	62.0859354914827	0.00882994623753675	PV2b1 (Frechter et al. eLife 2019)
822687493	162	602	602	1306	Traced	LHPV2a3_R	398031553	TRUE	right	LHPV2a3	LHPV2a3	LHLN	PVL03	gaba	unknown	NA	NA	3.564632885212	3	505	789	187	396	1665.94371339281	317.792403273958	840.270682234948	111.79750861859	0.00362850868439402	NA
759582415	151	598	598	1391	Traced	LHPV2a3_R	353599336	TRUE	right	LHPV2a3	LHPV2a3	LHLN	PVL03	gaba	unknown	NA	NA	3.39300411522634	3	434	908	176	406	1566.40898455032	280.404196715103	816.265901631055	63.020985653257	0.000351984438831554	NA
791303168	89	180	180	973	Traced	LHPV2a4_R	244687381	TRUE	right	LHPV2a4	LHPV2a4	LHON	PVL03	gaba	unknown	NA	NA	3.27263374485597	3	820	76	148	26	946.001910023666	456.420119649037	87.587362632847	25.4122653779809	0.00663912874395167	NA
790948245	87	184	184	961	Traced	LHPV2a4_R	247063417	TRUE	right	LHPV2a4	LHPV2a4	LHON	PVL03	gaba	unknown	NA	NA	3.27021494370522	3	595	318	77	95	885.834137046286	224.361151761281	338.890571884168	37.4257516406166	0.0261817443368273	NA
698513115	96	226	226	1064	Traced	LHPV2a4_R	254982618	TRUE	right	LHPV2a4	LHPV2a4	LHON	PVL03	gaba	unknown	NA	NA	3.30510204081633	3	537	513	71	147	1005.87711254819	218.570917946666	431.611338635416	57.6305557751593	0.0218893901581835	NA
605754137	115	241	241	1244	Traced	LHPV2a5_R	280852915	TRUE	right	LHPV2a5	LHPV2a5	LHLN	PVL03	gaba	unknown	NA	NA	3.41435897435897	4	481	719	62	169	1011.66904112589	151.8710558486	463.838391022053	52.527093785549	0.0118759504136278	NA
759586495	126	268	268	1233	Traced	LHPV2a5_R	277662604	TRUE	right	LHPV2a5	LHPV2a5	LHLN	PVL03	gaba	unknown	NA	NA	3.6	4	912	307	136	126	1059.69917472707	330.354082805384	292.389761456919	40.4781904216808	0.0369653157363878	NA
852293337	80	171	171	735	Traced	LHPV2b1_R	210059521	TRUE	right	LHPV2b1	LHPV2b1	LHLN	PVL03	gaba	unknown	NA	NA	3.17078189300412	3	490	245	64	96	767.451187688453	158.548031018118	305.803208322447	65.7662453669508	0.0458237956639652	NA
883358778	82	152	152	764	Traced	LHPV2b1_R	191220682	TRUE	right	LHPV2b1	LHPV2b1	LHLN	PVL03	gaba	unknown	NA	NA	3.06760847628658	3	653	86	104	44	761.811143177899	322.41697476021	100.564787760198	86.4115872747855	0.0344402096445933	NA
761247578	64	105	105	542	Traced	LHPV2b1_R	168109894	TRUE	right	LHPV2b1	LHPV2b1	LHLN	PVL03	gaba	unknown	NA	NA	3.11338100102145	3	306	236	25	65	747.486769557733	99.9479710143852	304.298871274756	102.832796720911	0.0503635546515112	NA
791946438	44	92	92	336	Traced	LHPV2b2_a_R	154579363	TRUE	right	LHPV2b2_a	LHPV2b2_a	LHLN	PVL03	gaba	unknown	NA	NA	3.13251783893986	3	122	209	14	70	750.304785607533	115.230116791092	246.452121742573	108.546906632269	0.0325121905029497	NA
821946760	62	121	121	543	Traced	LHPV2b2_a_R	150461830	TRUE	right	LHPV2b2_a	LHPV2b2_a	LHLN	PVL03	gaba	unknown	NA	NA	3.11167512690355	3	265	278	33	81	816.072278997092	134.18553668957	273.047025362308	124.207967587527	0.0255549668910133	NA
791946302	61	133	133	483	Traced	LHPV2b2_a_R	161155779	TRUE	right	LHPV2b2_a	LHPV2b2_a	LHLN	PVL03	gaba	unknown	NA	NA	3.28778467908903	3	223	260	23	105	876.153583525814	161.457464093559	323.218667655833	115.244605162493	0.0580357719553657	NA
729535036	65	130	130	520	Traced	LHPV2b2_a_R	166814386	TRUE	right	LHPV2b2_a	LHPV2b2_a	LHLN	PVL03	gaba	unknown	NA	NA	3.14124872057318	3	185	330	11	112	843.501586143787	95.2971558296909	365.682802265981	100.624150419581	0.0646498815764687	NA
729527582	59	138	138	529	Traced	LHPV2b2_a_R	172415484	FALSE	right	LHPV2b2_a	LHPV2b2_a	LHLN	PVL03	gaba	unknown	NA	NA	3.14476386036961	3	267	255	45	76	782.944287219277	173.547382550173	242.2851747307	108.069123429878	0.0124554948019703	NA
793992755	85	134	134	817	Traced	LHPV2b2_b_R	195873388	TRUE	right	LHPV2b2_b	LHPV2b2_b	LHON	PVL03	gaba	unknown	NA	NA	3.49276859504132	3	310	506	31	94	971.311112279556	225.626069031319	360.26239376775	134.102992538664	0.0116395850059352	NA
700567946	91	208	208	881	Traced	LHPV2b3_R	208223310	TRUE	right	LHPV2b3	LHPV2b3	LHLN	PVL03	gaba	unknown	NA	NA	3.38208032955716	3	434	419	86	104	955.420628314758	193.123677113398	311.08877840512	112.802023014786	0.00198251518407122	NA
731922839	85	228	228	777	Traced	LHPV2b3_R	178021915	TRUE	right	LHPV2b3	LHPV2b3	LHLN	PVL03	gaba	unknown	NA	NA	3.14227226202661	3	364	404	92	130	922.634666350188	207.756653750508	345.505496461915	76.7265581934738	0.00234302496877159	NA
761593520	103	270	270	970	Traced	LHPV2b3_R	181537367	TRUE	right	LHPV2b3	LHPV2b3	LHLN	PVL03	gaba	unknown	NA	NA	3.29381443298969	3	570	390	118	144	955.705422266785	277.965860523401	301.479631809731	88.6281781396125	0.0134431096359447	NA
821987663	64	166	166	545	Traced	LHPV2b3_R	175858889	TRUE	right	LHPV2b3	LHPV2b3	LHLN	PVL03	gaba	unknown	NA	NA	3.1935817805383	3	280	260	39	109	780.955655358882	100.064449186687	279.424681050909	196.349417183081	0.0440693859407707	NA
944371051	82	216	216	731	Traced	LHPV2b3_R	157857614	TRUE	right	LHPV2b3	LHPV2b3	LHLN	PVL03	gaba	unknown	NA	NA	3.16836734693878	3	408	323	103	109	838.455318928778	259.008969582789	259.12376172166	53.6971782173075	0.00343239293007835	NA
761252954	99	209	209	926	Traced	LHPV2b3_R	185719655	TRUE	right	LHPV2b3	LHPV2b3	LHLN	PVL03	gaba	unknown	NA	NA	3.16106014271152	3	426	500	81	120	844.175909387564	242.655362859783	239.904886575065	98.5787066635448	0.00206853597658585	NA
604735824	146	440	440	1733	Traced	LHPV2b4_R	416344063	TRUE	right	LHPV2b4	LHPV2b4	LHON	PVL03	gaba	unknown	NA	NA	3.37916666666667	3	1598	74	381	44	1649.14076453178	1016.32677789149	55.3968024867677	129.429130797736	0.009171536638651	NA
605391864	162	460	460	1836	Traced	LHPV2b4_R	426273727	TRUE	right	LHPV2b4	LHPV2b4	LHON	PVL03	gaba	unknown	NA	NA	3.27974947807933	3	747	1089	128	307	1629.34142464029	307.017248854462	764.608404912691	136.531427101651	0.00873298422231794	NA
698194389	221	521	521	2200	Traced	LHPV2b5_a_R	475464436	TRUE	right	LHPV2b5_a	LHPV2b5_a	LHLN	PVL03	gaba	unknown	NA	NA	3.2292531120332	3	1626	555	370	140	1632.97783928353	834.329826769654	267.964799927995	121.474276194372	0.00032825592328567	NA
946814479	186	583	583	2017	Traced	LHPV2b5_a_R	477350028	TRUE	right	LHPV2b5_a	LHPV2b5_a	LHON	PVL03	gaba	unknown	NA	NA	3.39690721649485	3	537	1411	95	457	1652.9179497019	196.059136807827	908.866058904285	141.15093973473	0.00983884845602478	NA
573350770	169	535	535	1811	Traced	LHPV2b5_b_R	495192191	TRUE	right	LHPV2b5_b	LHPV2b5_b	LHON	PVL03	gaba	unknown	NA	NA	3.5607476635514	4	821	920	158	362	1622.69190095063	387.524841817372	721.412106106682	100.352370770628	0.0193256184243183	NA
819220237	175	278	278	1569	Traced	LHPV2c1_a_R	315707876	TRUE	right	LHPV2c1_a	LHPV2c1_a	LHON	PDL09	unknown	unknown	NA	NA	3.46473029045643	3	903	661	72	203	1356.21671617939	258.52009065902	689.476597401577	78.997626898295	0.0618005449522896	NA
917842566	164	331	331	1525	Traced	LHPV2c1_a_R	291496888	TRUE	right	LHPV2c1_a	LHPV2c1_a	LHON	PDL09	unknown	unknown	NA	NA	3.43660531697342	3	896	578	105	224	1390.36464162655	323.820195987438	587.401619180713	34.5927433341664	0.0532147864494118	NA
856066807	167	283	283	1501	Traced	LHPV2c1_b_R	334920180	TRUE	right	LHPV2c1_b	LHPV2c1_b	LHON	PDL09	unknown	unknown	NA	NA	3.61934156378601	4	946	445	92	180	1397.19745711159	318.26169265611	621.841535341032	50.4700669531052	0.0741700379683279	NA
825032139	176	304	304	1665	Traced	LHPV2c1_b_R	321699808	TRUE	right	LHPV2c1_b	LHPV2c1_b	LHON	PDL09	unknown	unknown	NA	NA	3.63475546305931	4	1171	471	90	211	1331.65796575878	288.913742104196	643.784610513452	67.3272001479036	0.109252060295362	NA
885435892	173	291	291	1668	Traced	LHPV2c1_c_R	336298044	TRUE	right	LHPV2c1_c	LHPV2c1_c	LHON	PDL09	unknown	unknown	NA	NA	4.29132231404959	4	1250	384	119	164	1398.93533826367	334.127848901937	634.695765082358	81.3242573297076	0.0793001582838925	NA
913345831	169	306	306	1615	Traced	LHPV2c1_c_R	307136685	TRUE	right	LHPV2c1_c	LHPV2c1_c	LHON	PDL09	unknown	unknown	NA	NA	3.81262939958592	4	1146	469	98	198	1363.0022498203	300.193505527584	686.029338263784	70.5715553924902	0.0911858189791259	NA
889194717	125	262	262	865	Traced	LHPV2c2_R	304503084	TRUE	right	LHPV2c2	LHPV2c2	LHON	PDL09	unknown	unknown	NA	NA	3.57375381485249	4	570	257	58	191	1325.1009878874	355.695357224811	457.344120476207	79.5299027243024	0.142665661426044	PV2c1 (Dolan et al. eLife 2019)
1007882308	137	276	276	1003	Traced	LHPV2c2_R	341364445	TRUE	right	LHPV2c2	LHPV2c2	LHON	PDL09	unknown	unknown	NA	NA	3.68840579710145	4	769	224	72	196	1335.16992588292	368.317042110053	506.122379268068	58.9503773854675	0.178318065541139	PV2c1 (Dolan et al. eLife 2019)
854776068	118	239	239	1047	Traced	LHPV2c2_R	271654838	TRUE	right	LHPV2c2	LHPV2c2	LHON	PDL09	unknown	unknown	NA	NA	3.88946280991736	4	806	228	42	193	1213.77151396616	303.944495919355	489.07033490664	67.1802827932511	0.247576412825069	PV2c1 (Dolan et al. eLife 2019)
789248033	159	370	370	1516	Traced	LHPV2c3_R	266229651	TRUE	right	LHPV2c3	LHPV2c3	LHLN	PDL09	unknown	unknown	NA	NA	3.42518059855521	3	868	598	70	296	1314.18285584238	220.370509341933	657.850137589685	76.2557255540814	0.108653880790549	NA
946153322	123	235	235	1182	Traced	LHPV2c3_R	201876138	TRUE	right	LHPV2c3	LHPV2c3	LHLN	PDL09	unknown	unknown	NA	NA	3.52061855670103	3	759	423	55	175	1155.37895697958	210.493026273982	517.45774734511	75.3981322886851	0.103167718169593	NA
828144363	117	278	278	975	Traced	LHPV2c4_R	309290765	TRUE	right	LHPV2c4	LHPV2c4	LHON	PDL09	unknown	unknown	NA	NA	4.14718162839248	4	787	150	54	219	1093.05605006848	172.85316824184	524.659303857693	91.7088846961942	0.303816034607627	NA
946485296	137	291	291	1156	Traced	LHPV2c4_R	320362560	TRUE	right	LHPV2c4	LHPV2c4	LHON	PDL09	unknown	unknown	NA	NA	4.18659793814433	4	869	194	51	238	1068.29126368989	188.654130100695	530.623774522818	76.202150887676	0.295446448743562	NA
5813013545	114	269	269	907	Traced	LHPV2c5_R	273435885	TRUE	right	LHPV2c5	LHPV2c5	LHON	PDL09	unknown	unknown	NA	NA	4.30331262939959	4	483	416	65	195	1027.11314478145	203.679724271947	432.187393278664	109.692762188862	0.0563992132719687	NA
764001607	123	286	286	1115	Traced	LHPV2c5_R	307639803	TRUE	right	LHPV2c5	LHPV2c5	LHON	PDL09	unknown	unknown	NA	NA	4.3081695966908	4	652	458	94	185	1076.56732665578	238.813910129122	433.899266793979	78.4608518072846	0.0406671759977745	NA
857806966	104	243	243	789	Traced	LHPV2c5_R	260209409	TRUE	right	LHPV2c5	LHPV2c5	LHON	PDL09	unknown	unknown	NA	NA	3.71384615384615	4	501	282	59	183	1006.56591097369	248.835034079672	380.938979927223	103.143927116778	0.107031493691891	NA
763652770	124	302	302	950	Traced	LHPV2c5_R	302529603	TRUE	right	LHPV2c5	LHPV2c5	LHON	PDL09	unknown	unknown	NA	NA	4.26694045174538	4	614	270	70	227	1087.25733696603	183.172781078229	528.761642538545	107.472969151743	0.146464333447927	PV2e1 (Dolan et al. eLife 2019)
915792794	105	285	285	877	Traced	LHPV2c5_R	306121030	TRUE	right	LHPV2c5	LHPV2c5	LHON	PDL09	unknown	unknown	NA	NA	4.02272727272727	4	697	160	57	226	1098.46427214878	213.196448112997	497.700732386061	103.791029954126	0.273909328753036	NA
823400451	129	259	259	1159	Traced	LHPV2c6_R	230803853	TRUE	right	LHPV2c6	LHPV2c6	LHLN	PDL09	unknown	unknown	NA	NA	3.90486039296794	4	729	390	44	208	1128.8041194973	216.211133316684	502.851075205488	78.0810443392558	0.151247744036725	NA
764409134	268	657	657	1547	Traced	LHPV2d1_R	493872651	TRUE	right	LHPV2d1	LHPV2d1	LHON	PVL03	gaba	unknown	NA	NA	3.64711934156379	4	973	567	154	490	1979.98211684849	309.634931032959	1051.30925145454	51.0493832839831	0.109605230627214	NA
763731153	221	627	627	1345	Traced	LHPV2d1_R	472169315	TRUE	right	LHPV2d1	LHPV2d1	LHON	PVL03	gaba	unknown	NA	NA	3.81846473029046	4	858	472	153	474	2024.57274395753	297.412707114907	1121.79024727537	30.5121708474008	0.115652739702866	NA
853386077	209	380	380	1890	Traced	LHPV2e1_a_R	382809720	TRUE	right	LHPV2e1_a	LHPV2e1_a	LHON	PDL09	unknown	unknown	NA	NA	4.25180598555212	4	1255	536	49	326	1388.52214734059	269.525231249892	738.516339941968	86.1794107104311	0.218025587364471	NA
974788612	189	304	304	1772	Traced	LHPV2e1_a_R	370581948	TRUE	right	LHPV2e1_a	LHPV2e1_a	LHON	PDL09	unknown	unknown	NA	NA	4.31016597510373	4	1251	452	43	260	1197.99766633015	242.296732656833	594.722308712852	87.2935145128659	0.22970774232454	NA
1039906056	176	351	351	1583	Traced	LHPV2e1_a_R	352133574	TRUE	right	LHPV2e1_a	LHPV2e1_a	LHON	PDL09	unknown	unknown	NA	NA	4.09907120743034	4	1143	375	36	313	1208.88113355021	174.163116525913	654.166760908225	74.3759822326126	0.2938354994727	NA
885776346	221	395	395	2163	Traced	LHPV2e1_b_R	397535247	TRUE	right	LHPV2e1_b	LHPV2e1_b	LHON	PDL09	unknown	unknown	NA	NA	4.46555323590814	5	1457	604	75	318	1551.21003084352	328.185212877236	814.38665903353	82.6747161594302	0.1724488380556	NA
823705448	193	332	332	1935	Traced	LHPV2e1_b_R	365294081	TRUE	right	LHPV2e1_b	LHPV2e1_b	LHON	PDL09	unknown	unknown	NA	NA	4.7375	5	1579	299	141	181	1436.83520387648	451.450764703098	528.000908025865	90.3546780072743	0.120276663498689	NA
792338630	185	268	268	1873	Traced	LHPV2e2_R	366469490	TRUE	right	LHPV2e2	LHPV2e2	LHON	PDL09	unknown	unknown	NA	NA	4.45971074380165	5	1339	497	60	200	1338.86751779571	293.26378207579	624.632881784549	78.8853215088243	0.153202877710633	NA
823374529	217	316	316	2113	Traced	LHPV2e2_R	382874411	TRUE	right	LHPV2e2	LHPV2e2	LHON	PDL09	unknown	unknown	NA	NA	4.66597510373444	5	1669	418	97	211	1556.32601551485	380.271382569828	695.186693928498	108.584677675469	0.154476648518733	NA
886124924	202	331	331	1959	Traced	LHPV2e2_R	362622151	TRUE	right	LHPV2e2	LHPV2e2	LHON	PDL09	unknown	unknown	NA	NA	5.02380952380952	5	1569	268	131	195	1502.3017402835	397.044128086905	622.997813254985	104.536087876435	0.15295536065655	NA
882383361	122	388	388	800	Traced	LHPV2f1_a_R	326524337	TRUE	right	LHPV2f1_a	LHPV2f1_a	LHON	PVL03	gaba	unknown	NA	NA	3.85350966429298	4	372	419	124	250	1340.74492880332	266.747250845491	559.641138924936	148.734241731537	0.0138811798096987	NA
912045124	116	335	335	940	Traced	LHPV2f1_a_R	336456670	TRUE	right	LHPV2f1_a	LHPV2f1_a	LHON	PVL03	gaba	unknown	NA	NA	3.88306451612903	4	636	286	193	132	1273.64428599338	477.050738901215	324.910329149608	40.4370472764369	0.00680976811121836	NA
5813016163	146	441	441	1260	Traced	LHPV2f1_b_R	391507526	TRUE	right	LHPV2f1_b	LHPV2f1_b	LHON	PVL03	gaba	unknown	NA	NA	3.89289392378991	4	840	366	298	131	1704.27651342678	839.725384171741	270.434278913837	11.8844133186572	2.80341403280371e-06	NA
881342447	118	359	359	1117	Traced	LHPV2f1_b_R	319620311	TRUE	right	LHPV2f1_b	LHPV2f1_b	LHON	PVL03	gaba	unknown	NA	NA	3.92339121552605	4	733	304	154	189	1383.15702354679	337.414275856718	524.973256377691	94.5783354044175	0.0467980099835844	NA
880668750	120	424	424	819	Traced	LHPV2f2_R	380733279	TRUE	right	LHPV2f2	LHPV2f2	LHN	PVL03	gaba	unknown	NA	NA	3.79306829765545	4	431	382	173	242	1441.16160265639	384.012032182405	518.02909832979	35.539130093683	0.00901011349384129	NA
974460512	111	409	409	776	Traced	LHPV2f2_R	316940453	TRUE	right	LHPV2f2	LHPV2f2	LHN	PVL03	gaba	unknown	NA	NA	3.76578411405295	4	529	229	264	117	1416.44860404977	555.905833891736	270.906198194794	34.5920701578284	2.04241049835963e-05	NA
912390224	139	398	398	1073	Traced	LHPV2f2_R	363692378	TRUE	right	LHPV2f2	LHPV2f2	LHN	PVL03	gaba	unknown	NA	NA	3.85097636176773	4	848	195	290	96	1415.69847887502	607.854261474045	242.053783663083	109.142947761968	0.00385296427844539	NA
942725696	114	367	367	741	Traced	LHPV2f2_R	356241282	TRUE	right	LHPV2f2	LHPV2f2	LHN	PVL03	gaba	unknown	NA	NA	3.75204081632653	4	356	366	162	195	1244.27223126469	336.479000086291	389.026746877594	130.088428414758	0.0010798170524825	NA
701328333	118	366	366	1023	Traced	LHPV2f3_R	322088352	TRUE	right	LHPV2f3	LHPV2f3	LHON	PVL03	gaba	unknown	NA	NA	4.22810590631365	4	381	624	66	280	1296.69697033594	224.030720602912	553.273676625579	126.746506489865	0.0286868116202891	PV2d1 (Dolan et al. eLife 2019)
732357920	151	499	499	1176	Traced	LHPV2f3_R	398893420	TRUE	right	LHPV2f3	LHPV2f3	LHON	PVL03	gaba	unknown	NA	NA	4.2027027027027	4	568	608	138	358	1500.96427399869	277.343702208334	776.376900340989	85.182906345586	0.0304099230399694	PV2d1 (Frechter et al. eLife 2019) (Dolan et al. eLife 2019)
912044495	85	295	295	846	Traced	LHPV2f3_R	253928281	TRUE	right	LHPV2f3	LHPV2f3	LHON	PVL03	gaba	unknown	NA	NA	4.12177502579979	4	604	234	92	192	1144.8635207525	228.422619284825	552.216254269551	16.0501517635575	0.109883509944442	PV2d1 (Frechter et al. eLife 2019) (Dolan et al. eLife 2019)
914027038	691	1236	1236	5759	Traced	LHPV2g1_R	974422809	TRUE	right	LHPV2g1	LHPV2g1	LHON	PVL01	unknown	unknown	NA	NA	4.14345114345114	4	4279	1479	283	950	3285.46582087021	594.945564441035	1764.2667332882	96.667729960874	0.175125215665208	NA
882995659	828	1953	1953	7186	Traced	LHPV2g1_R	1246070081	TRUE	right	LHPV2g1	LHPV2g1	LHON	PVL01	unknown	unknown	NA	NA	4.059670781893	4	5368	1814	356	1588	4193.52386557323	671.813491134707	2488.24546647762	104.532666394498	0.220571144316281	NA
543766436	400	836	836	3509	Traced	LHPV2h1_R	801022680	TRUE	right	LHPV2h1	LHPV2h1	LHON	PDL12	unknown	unknown	NA	NA	3.77546777546778	4	2442	1041	343	473	2876.72089416185	725.911769857418	1335.00149630992	153.975292883742	0.0524544769483792	NA
794752471	443	1413	1413	3434	Traced	LHPV2i1_R	946521198	TRUE	right	LHPV2i1	LHPV2i1	LHON	PDL12	unknown	unknown	NA	NA	4.33997901364113	4	3240	194	299	1108	3219.87845177193	588.209268646557	1985.07517669299	71.4544903091891	0.460901192945463	NA
943416162	480	1495	1495	3554	Traced	LHPV2i1_R	1004027858	TRUE	right	LHPV2i1	LHPV2i1	LHON	PDL12	unknown	unknown	NA	NA	4.53838174273859	4	2827	727	271	1216	3683.43884940087	574.625155134028	2300.3525301147	50.027824414393	0.279299801983116	NA
725860918	531	855	855	4209	Traced	LHPV2i2_R	851848729	TRUE	right	LHPV2i2	LHPV2i2	LHON	PDL12	unknown	unknown	NA	NA	4.03484688489968	4	1492	2677	38	814	2777.98139034549	163.183205547252	2045.67760581945	3.09528668880481	0.0930114020313035	NA
913754682	379	668	668	3170	Traced	LHPV2i2_R	708544270	TRUE	right	LHPV2i2	LHPV2i2	LHON	PDL12	unknown	unknown	NA	NA	4.18782249742002	4	2933	133	255	400	2222.94230220796	562.440805566317	1065.8449225415	88.8737060312284	0.313827617674756	NA
913681721	209	1294	1294	1637	Traced	LHPV3a1_R	457013077	TRUE	right	LHPV3a1	LHPV3a1	LHON	PVL10	acetylcholine	unknown	NA	NA	4.1482254697286	4	1231	318	68	1198	2023.90700029689	348.536289825006	1226.09303350247	204.415444508822	0.460257975890369	NA
1036503560	229	1251	1251	1558	Traced	LHPV3a1_R	501916199	TRUE	right	LHPV3a1	LHPV3a1	LHON	PVL10	acetylcholine	unknown	NA	NA	3.78778467908903	4	1117	353	66	1169	1937.06151182232	394.144979842296	1179.52601751967	117.796370891479	0.421408046279162	NA
793677224	62	421	421	333	Traced	LHPV3a2_R	416594506	TRUE	right	LHPV3a2	LHPV3a2	LHON	PVL10	acetylcholine	unknown	NA	NA	3.75051759834369	4	70	229	40	364	1313.43817227924	359.583424510579	672.98895297316	65.2246700445846	0.0245607893741145	NA
792313813	69	375	375	392	Traced	LHPV3a2_R	369548949	FALSE	right	LHPV3a2	LHPV3a2	LHON	PVL10	acetylcholine	unknown	NA	NA	3.85625646328852	4	243	143	153	211	1283.31916052664	636.457186378426	333.392644196074	67.2452933193919	0.0318866550624985	NA
5813056930	32	209	209	185	Traced	LHPV3a3_a_R	272751980	TRUE	right	LHPV3a3_a	LHPV3a3_a	LHON	PVL10	acetylcholine	unknown	NA	NA	3.86302780638517	4	76	80	54	149	847.754893979349	272.989523742473	337.716472791967	13.4225853616665	0.0380199600233607	NA
914364284	85	330	330	412	Traced	LHPV3a3_b_R	408546195	TRUE	right	LHPV3a3_b	LHPV3a3_b	LHON	PVL10	acetylcholine	unknown	NA	NA	3.77628865979381	4	312	62	38	280	1298.23935497346	117.244333753518	807.649817561976	96.0835857528248	0.409050256700808	NA
945057870	78	372	372	331	Traced	LHPV3a3_b_R	446782634	TRUE	right	LHPV3a3_b	LHPV3a3_b	LHON	PVL10	acetylcholine	unknown	NA	NA	3.81275720164609	4	198	72	29	324	1254.46979174585	79.4869096916543	761.385789735094	137.875000211342	0.356078305660766	NA
974788614	237	1267	1267	1587	Traced	LHPV3a3_c_R	533919892	TRUE	right	LHPV3a3_c	LHPV3a3_c	LHON	PVL10	acetylcholine	unknown	NA	NA	3.85890834191555	4	1131	456	49	1213	2093.11238920379	324.606475153318	1363.29942862408	87.0585691588296	0.395452172235877	NA
947172504	196	425	425	1088	Traced	LHPV3b1_a_R	531784745	TRUE	right	LHPV3b1_a	LHPV3b1_a	LHON	PVL10	acetylcholine	unknown	NA	NA	3.86673448626653	4	1042	36	83	331	1604.80975648873	299.946885901169	772.492090930156	24.8854482754664	0.530166385119748	NA
1006160722	180	326	326	926	Traced	LHPV3b1_a_R	418559573	TRUE	right	LHPV3b1_a	LHPV3b1_a	LHON	PVL10	acetylcholine	unknown	NA	NA	3.91786447638604	4	760	78	63	251	1337.86191530799	195.400159755166	643.684520126107	103.407503218788	0.403391811781213	NA
1037535479	160	328	328	886	Traced	LHPV3b1_a_R	331085240	TRUE	right	LHPV3b1_a	LHPV3b1_a	LHON	PVL10	acetylcholine	unknown	NA	NA	4.03285420944558	4	657	183	47	273	1248.81969065276	184.948497259614	588.059852068249	101.782917370918	0.297846351714743	NA
912732057	196	516	516	1278	Traced	LHPV3b1_b_R	376533719	TRUE	right	LHPV3b1_b	LHPV3b1_b	LHON	PVL10	acetylcholine	unknown	NA	NA	3.3238578680203	3	374	862	41	464	1719.61002818529	139.94642954399	945.961317958726	132.999481672741	0.0535886888015769	NA
1068912795	163	327	327	881	Traced	LHPV3b1_b_R	351052346	TRUE	right	LHPV3b1_b	LHPV3b1_b	LHON	PVL10	acetylcholine	unknown	NA	NA	3.85185185185185	3	538	333	34	289	1179.84966730225	154.991179802868	652.579381130142	82.4688823949434	0.198706231103854	NA
1068543885	192	426	426	1219	Traced	LHPV3b1_b_R	342751396	TRUE	right	LHPV3b1_b	LHPV3b1_b	LHON	PVL10	acetylcholine	unknown	NA	NA	3.1567239635996	3	413	779	30	390	1449.19863843136	125.001191905892	757.008303252145	101.424623180867	0.0763928005562635	PV3f1 (Dolan et al. eLife 2019)
479935033	1219	3490	3490	11571	Traced	LHPV3c1_R	2801189861	TRUE	right	LHPV3c1	LHPV3c1	LHON	PVL10	acetylcholine	unknown	NA	NA	4.41350210970464	4	11498	35	1151	2312	6815.5998128444	2062.126865395	3372.67929978297	108.874074669845	0.501739991505835	NA
760566169	129	480	480	1362	Traced	LHPV4a1_R	207062910	TRUE	right	LHPV4a1	LHPV4a1	LHLN	PDL08	glutamate	unknown	NA	NA	3.16735112936345	3	492	793	107	363	1345.8266674371	188.76706879695	669.259712808887	130.085904037426	0.0189273668829186	NA
790918098	202	506	506	2180	Traced	LHPV4a1_R	227120053	FALSE	right	LHPV4a1	LHPV4a1	LHLN	PDL08	glutamate	unknown	NA	NA	3.19979402677652	3	904	1189	127	369	1536.47466039122	287.282457846065	710.200124955712	92.9620811270489	0.0214165792428039	NA
760225398	102	346	346	1177	Traced	LHPV4a1_R	160077159	FALSE	right	LHPV4a1	LHPV4a1	LHLN	PDL08	glutamate	unknown	NA	NA	3.22863027806385	3	597	542	130	202	1099.2495032767	205.972918674747	426.367768089074	128.627177849663	0.0115840021617443	PV4a2 (Frechter et al. eLife 2019) (Dolan et al. eLife 2019)
790918133	171	614	614	1917	Traced	LHPV4a1_R	199795885	FALSE	right	LHPV4a1	LHPV4a1	LHLN	PDL08	glutamate	unknown	NA	NA	3.15995872033024	3	554	1290	136	466	1629.69259616487	248.404030694687	905.653034458183	118.764079956104	0.00470257906627392	NA
480258202	150	219	219	1432	Traced	LHPV4a10_a_R	363067874	TRUE	right	LHPV4a10_a	LHPV4a10_a	LHLN	PDL08	glutamate	unknown	NA	NA	3.15478615071283	3	899	478	93	120	1368.23789759029	471.130678818711	457.400129245204	37.7679649876358	0.0284037429784947	NA
542639270	149	180	180	1450	Traced	LHPV4a10_a_R	295055277	FALSE	right	LHPV4a10_a	LHPV4a10_a	LHLN	PDL08	glutamate	unknown	NA	NA	3.09758551307847	3	974	432	92	81	1386.72973213195	453.736976656868	355.120831397211	63.8191552599014	0.015856076002985	NA
541952417	116	183	183	1242	Traced	LHPV4a10_a_R	213318706	FALSE	right	LHPV4a10_a	LHPV4a10_a	LHLN	PDL08	glutamate	unknown	NA	NA	3.30246913580247	3	641	601	38	142	1203.8149440411	216.009037816843	496.895008984413	33.494064831829	0.0577519133960358	NA
5813020004	164	353	353	1474	Traced	LHPV4a10_a_R	258397805	FALSE	right	LHPV4a10_a	LHPV4a10_a	LHLN	PDL08	glutamate	unknown	NA	NA	3.4224049331963	3	1215	242	243	104	1493.00086578001	701.11902533448	228.635766785291	21.7772384404256	0.0167736427637807	NA
604022763	144	239	239	1395	Traced	LHPV4a10_a_R	213095560	FALSE	right	LHPV4a10_a	LHPV4a10_a	LHLN	PDL08	glutamate	unknown	NA	NA	3.44927536231884	3	561	828	80	151	1282.34106680223	239.766619432592	535.698140742965	22.4414444725854	0.00209671406956891	NA
572642334	136	232	232	1293	Traced	LHPV4a10_a_R	222164609	FALSE	right	LHPV4a10_a	LHPV4a10_a	LHLN	PDL08	glutamate	unknown	NA	NA	3.51437371663244	3	560	697	87	136	1257.86945825994	308.553683730905	414.750876211852	34.5276769468453	0.00189598369291755	NA
542980274	124	162	162	1219	Traced	LHPV4a10_b_R	232517295	FALSE	right	LHPV4a10_b	LHPV4a10_b	LHLN	PDL08	glutamate	unknown	NA	NA	3.19556451612903	3	790	427	56	100	1259.68916546659	312.811790853247	470.11187225743	64.9546775254585	0.0490900362019935	NA
5813055963	384	333	333	3996	Traced	LHPV4a11_R	539664792	TRUE	right	LHPV4a11	LHPV4a11	LHLN	PDL08	glutamate	unknown	NA	NA	3.24747474747475	3	2946	984	135	191	2002.47313696446	738.056878871487	594.622981941913	45.2090516392154	0.0651211252475994	PV4b1 (Dolan et al. eLife 2019); Local2 (Jeanne et al. Neuron 2018)
666450841	485	1122	1122	4980	Traced	LHPV4a11_R	693739268	TRUE	right	LHPV4a11	LHPV4a11	LHLN	PDL08	glutamate	unknown	NA	NA	3.25749741468459	3	2113	2856	428	685	3179.83589817577	1042.57290008753	1261.07911079106	41.8547654255434	0.00107617539027127	NA
790922968	188	433	433	1978	Traced	LHPV4a12_a_R	257806302	FALSE	right	LHPV4a12_a	LHPV4a12_a	LHON	PDL08	glutamate	unknown	NA	NA	3.34090909090909	3	1286	662	211	218	1666.84691693914	697.343701929583	517.814747977817	62.979726986921	0.0185176812863543	PV4b2 (Dolan et al. eLife 2019)
574037479	192	495	495	1960	Traced	LHPV4a12_b_R	270557493	FALSE	right	LHPV4a12_b	LHPV4a12_b	LHON	PDL08	glutamate	unknown	NA	NA	3.30198537095089	3	907	1000	116	356	1719.28859733983	320.641125314191	893.559325085289	105.149653154995	0.0361545294985797	PV4c2 (Dolan et al. eLife 2019)
790918176	122	342	342	1150	Traced	LHPV4a2_R	237318425	FALSE	right	LHPV4a2	LHPV4a2	LHLN	PDL08	glutamate	unknown	NA	NA	3.38773388773389	3	697	408	110	217	1206.30727556475	237.062873042158	606.8434785801	54.6141337471424	0.0578011728619512	PV4a4 (Frechter et al. eLife 2019) (Dolan et al. eLife 2019)
760566735	115	440	440	1005	Traced	LHPV4a2_R	220079702	FALSE	right	LHPV4a2	LHPV4a2	LHLN	PDL08	glutamate	unknown	NA	NA	3.30769230769231	3	630	364	151	284	1276.12658690214	343.221897933348	530.427541068098	94.6935321459249	0.0574952776479397	NA
5813064407	123	547	547	1150	Traced	LHPV4a2_R	322679991	TRUE	right	LHPV4a2	LHPV4a2	LHLN	PDL08	glutamate	unknown	NA	NA	3.25960539979232	3	817	277	301	232	1381.27590343011	508.689673636751	375.472864511047	68.0836446024228	0.0262113023035542	NA
790917992	129	112	112	1036	Traced	LHPV4a3_R	179045176	FALSE	right	LHPV4a3	LHPV4a3	LHLN	PDL08	glutamate	unknown	NA	NA	3.23232323232323	3	945	84	62	48	1059.34157925638	411.03108392065	229.983809305959	92.0631750795579	0.116750274947901	NA
760907730	140	276	276	1390	Traced	LHPV4a4_a_R	241765761	TRUE	right	LHPV4a4_a	LHPV4a4_a	LHLN	PDL08	glutamate	unknown	NA	NA	3.2472024415056	3	693	697	51	221	1230.63361296827	197.224428385865	552.978072745874	59.6740669257391	0.0650110056405009	PV4a2 (Frechter et al. eLife 2019) (Dolan et al. eLife 2019)
760566746	105	215	215	1069	Traced	LHPV4a4_b_R	219969433	TRUE	right	LHPV4a4_b	LHPV4a4_b	LHLN	PDL08	glutamate	unknown	NA	NA	3.14795918367347	3	621	356	118	73	1055.63979759321	377.083530641875	234.381493516806	36.2626040953662	0.00020882868237837	NA
760566454	134	312	312	1309	Traced	LHPV4a4_b_R	165215568	FALSE	right	LHPV4a4_b	LHPV4a4_b	LHLN	PDL08	glutamate	unknown	NA	NA	3.1952479338843	3	581	648	114	185	1195.6616459122	244.392397270648	457.458431907181	91.9818721304464	0.00542490485559977	PV4a2 (Frechter et al. eLife 2019) (Dolan et al. eLife 2019)
760566744	117	102	102	1007	Traced	LHPV4a4_c_R	210040619	TRUE	right	LHPV4a4_c	LHPV4a4_c	LHLN	PDL08	glutamate	unknown	NA	NA	3.17871485943775	3	187	785	4	93	949.90655456934	111.596306838543	411.905186423051	58.6519422586236	0.0280877360187287	PV4a3 (Frechter et al. eLife 2019) (Dolan et al. eLife 2019)
729518762	163	112	112	1415	Traced	LHPV4a4_c_R	257683339	TRUE	right	LHPV4a4_c	LHPV4a4_c	LHLN	PDL08	glutamate	unknown	NA	NA	3.12919633774161	3	1197	199	55	54	1094.16513642264	386.8666864082	240.734709795616	53.1356119914334	0.0876196977490238	NA
5813070112	99	172	172	831	Traced	LHPV4a5_a_R	145776958	FALSE	right	LHPV4a5_a	LHPV4a5_a	LHLN	PDL08	glutamate	unknown	NA	NA	3.04620123203285	3	667	164	59	109	942.071509563212	305.558518954159	292.492749059012	61.8345106057673	0.141962243284137	NA
730222949	95	164	164	866	Traced	LHPV4a5_a_R	195652142	TRUE	right	LHPV4a5_a	LHPV4a5_a	LHON	PDL08	glutamate	unknown	NA	NA	3.05241521068859	3	664	202	52	107	959.176136382436	243.026101576311	314.264137900943	55.62338680871	0.127766224172531	PV4a6 (Frechter et al. eLife 2019) (Dolan et al. eLife 2019)
730563850	95	165	165	807	Traced	LHPV4a5_a_R	233968196	TRUE	right	LHPV4a5_a	LHPV4a5_a	LHON	PDL08	glutamate	unknown	NA	NA	3.08682328907048	3	676	125	46	114	1016.67676637342	190.933597626916	353.525208573588	55.8452168563468	0.222207629408003	NA
605416852	94	159	159	906	Traced	LHPV4a5_b_R	127779487	FALSE	right	LHPV4a5_b	LHPV4a5_b	LHLN	PDL08	glutamate	unknown	NA	NA	3.09577754891864	3	496	410	47	107	945.062265041865	226.188283857268	357.190456912167	57.3316122203914	0.0359033141571325	NA
637121560	147	271	271	1591	Traced	LHPV4a5_b_R	171784214	FALSE	right	LHPV4a5_b	LHPV4a5_b	LHLN	PDL08	glutamate	unknown	NA	NA	3.190625	3	1072	517	99	168	1214.85387678895	345.212946345323	475.860117197055	62.6086625827625	0.0570798270051417	PV4a3 (Frechter et al. eLife 2019) (Dolan et al. eLife 2019)
729867427	167	326	326	1794	Traced	LHPV4a6_R	242691130	TRUE	right	LHPV4a6	LHPV4a6	LHLN	PDL08	glutamate	unknown	NA	NA	3.17750257997936	3	905	886	101	213	1369.83716866638	266.924365114275	579.319464852412	46.1836472829942	0.0208251529546163	PV4a4 (Dolan et al. eLife 2019)
697801711	97	163	163	893	Traced	LHPV4a7_a_R	196362979	TRUE	right	LHPV4a7_a	LHPV4a7_a	LHLN	PDL08	glutamate	unknown	NA	NA	3.32271325796506	3	771	122	61	102	1005.79640868301	325.022885837736	269.928495948595	40.1014703282066	0.180094145906345	NA
634711906	76	112	112	647	Traced	LHPV4a7_a_R	182457637	TRUE	right	LHPV4a7_a	LHPV4a7_a	LHLN	PDL08	glutamate	unknown	NA	NA	3.14401622718053	3	569	78	40	68	846.658936678388	281.097074063363	204.327459557971	45.7820623778095	0.198334933107909	NA
666769954	120	167	167	1086	Traced	LHPV4a7_a_R	243765177	TRUE	right	LHPV4a7_a	LHPV4a7_a	LHLN	PDL08	glutamate	unknown	NA	NA	3.14419087136929	3	936	150	66	98	1074.37915008599	344.074299327169	280.221166192837	55.2521795679861	0.156671389284507	Local1 (Jeanne et al. Neuron 2018)
603340681	102	238	238	1062	Traced	LHPV4a7_b_R	148102682	FALSE	right	LHPV4a7_b	LHPV4a7_b	LHON	PDL08	glutamate	unknown	NA	NA	3.39896907216495	3	783	279	101	135	1096.07043489749	388.673809465833	356.929291290689	48.600842508194	0.064904771654746	NA
634717239	92	205	205	805	Traced	LHPV4a7_b_R	208257838	TRUE	right	LHPV4a7_b	LHPV4a7_b	LHON	PDL08	glutamate	unknown	NA	NA	3.25708289611752	3	546	250	68	133	977.756866379555	299.486019857738	333.711177958232	37.4951132927709	0.0799725377428085	NA
605727696	112	224	224	1038	Traced	LHPV4a7_c_R	225533199	TRUE	right	LHPV4a7_c	LHPV4a7_c	LHLN	PDL08	glutamate	unknown	NA	NA	3.22903885480573	3	845	193	98	124	1160.20436437104	423.638352211267	333.686004526841	44.2559758243552	0.102032934735695	PV4a9 (Dolan et al. eLife 2019)
5813048298	378	450	450	4042	Traced	LHPV4a7_c_R	519607721	TRUE	right	LHPV4a7_c	LHPV4a7_c	LHLN	PDL08	glutamate	unknown	NA	NA	3.158953722334	3	2467	1575	240	206	1941.89786827302	628.067704980802	540.216487275798	15.8754353631687	0.00297159652596324	PV4a4 (Frechter et al. eLife 2019) (Dolan et al. eLife 2019)
698820341	127	201	201	1257	Traced	LHPV4a7_c_R	248508929	TRUE	right	LHPV4a7_c	LHPV4a7_c	LHLN	PDL08	glutamate	unknown	NA	NA	3.11855670103093	3	805	401	96	88	1237.32867110218	324.001563668979	377.849010730601	46.296943497508	0.0132194931877767	NA
698846552	98	170	170	870	Traced	LHPV4a7_c_R	237243991	TRUE	right	LHPV4a7_c	LHPV4a7_c	LHLN	PDL08	glutamate	unknown	NA	NA	3.11349693251534	3	649	221	72	96	1084.27235290502	355.913660808358	293.772190726034	75.7932632905718	0.0674194227712975	NA
759888036	219	214	214	2098	Traced	LHPV4a7_c_R	299104359	TRUE	right	LHPV4a7_c	LHPV4a7_c	LHLN	PDL08	glutamate	unknown	NA	NA	3.3264887063655	3	1060	1019	73	119	1247.09866473396	302.184205393579	422.060378288817	39.5890116632718	0.00906290765864315	NA
636758191	393	355	355	3628	Traced	LHPV4a7_d_R	572146405	TRUE	right	LHPV4a7_d	LHPV4a7_d	LHLN	PDL08	glutamate	unknown	NA	NA	3.36065573770492	3	945	2494	62	237	2066.46281067419	312.555027833196	845.343252832148	86.8884552469484	0.0032064732261694	NA
761236545	98	163	163	881	Traced	LHPV4a7_e_R	233059021	TRUE	right	LHPV4a7_e	LHPV4a7_e	LHLN	PDL08	glutamate	unknown	NA	NA	3.17368961973279	3	732	132	104	52	995.511128532234	454.499589436458	136.924643730422	69.0256022598072	0.0292746183863705	NA
729530620	152	238	238	1650	Traced	LHPV4a7_f_R	237883966	TRUE	right	LHPV4a7_f	LHPV4a7_f	LHLN	PDL08	glutamate	unknown	NA	NA	3.14461538461538	3	963	653	107	128	1257.12070158693	330.075942769051	427.876501019789	50.1391819751507	0.0116477555448135	PV4a4 (Frechter et al. eLife 2019) (Dolan et al. eLife 2019)
574696428	96	184	184	980	Traced	LHPV4a8_R	210467741	TRUE	right	LHPV4a8	LHPV4a8	LHLN	PDL08	glutamate	unknown	NA	NA	3.39752832131823	3	622	358	60	120	1034.62320163047	247.010770439873	389.104285832406	48.3825397808499	0.0562584601631084	NA
605740410	118	217	217	1223	Traced	LHPV4a8_R	239472420	TRUE	right	LHPV4a8	LHPV4a8	LHLN	PDL08	glutamate	unknown	NA	NA	3.29313929313929	3	775	448	68	148	1254.48834772475	306.528288059983	475.273575572967	41.7021248871911	0.0626453034446959	NA
729877292	122	182	182	1109	Traced	LHPV4a8_R	262331945	TRUE	right	LHPV4a8	LHPV4a8	LHLN	PDL08	glutamate	unknown	NA	NA	3.32959183673469	3	802	303	90	86	1107.74778129603	409.150102104477	284.744363303533	39.7247120939356	0.0301048721047192	NA
820581604	290	196	196	2877	Traced	LHPV4a9_a_R	468256970	TRUE	right	LHPV4a9_a	LHPV4a9_a	LHLN	PDL08	glutamate	unknown	NA	NA	3.12877263581489	3	1038	1580	56	120	1501.17835228126	264.91508481699	545.291803511419	52.6221055760199	0.00331237459074907	PV4a7 (Frechter et al. eLife 2019)
729859814	278	228	228	2602	Traced	LHPV4a9_a_R	465654926	TRUE	right	LHPV4a9_a	LHPV4a9_a	LHLN	PDL08	glutamate	unknown	NA	NA	3.23147208121827	3	1837	743	142	65	1507.89231606871	566.309942726365	216.336117890475	39.4120029957148	0.000421422366473245	PV4a7 (Frechter et al. eLife 2019)
821957319	107	178	178	947	Traced	LHPV4a9_b_R	227559940	TRUE	right	LHPV4a9_b	LHPV4a9_b	LHLN	PDL08	glutamate	unknown	NA	NA	3.09321175278622	3	542	390	61	110	1173.7845958232	254.45221007692	456.690296203122	34.468926801732	0.0310111382336142	PV4a7 (Frechter et al. eLife 2019)
696095496	103	158	158	945	Traced	LHPV4a9_b_R	201940210	TRUE	right	LHPV4a9_b	LHPV4a9_b	LHLN	PDL08	glutamate	unknown	NA	NA	3.26796714579055	3	662	283	77	77	954.819056636274	252.600299579061	288.649703229653	49.4191329716645	0.0257565609371267	NA
636434899	174	297	297	1657	Traced	LHPV4b1_a_R	350203791	TRUE	right	LHPV4b1_a	LHPV4b1_a	LHON	PDL16	glutamate	unknown	NA	NA	3.37720207253886	3	996	596	86	204	1378.75680681436	300.720944860175	580.856675137452	96.6277655211806	0.0671438187236629	NA
5901193788	206	439	439	1888	Traced	LHPV4b1_a_R	422699851	TRUE	right	LHPV4b1_a	LHPV4b1_a	LHON	PDL16	glutamate	unknown	NA	NA	3.34158926728586	3	1090	785	79	347	1676.56338258924	352.402449537478	782.353827339839	84.8739797496691	0.104872859957552	NA
604398262	241	556	556	2171	Traced	LHPV4b1_b_R	513827484	TRUE	right	LHPV4b1_b	LHPV4b1_b	LHON	PDL16	glutamate	unknown	NA	NA	3.4514811031665	3	1299	872	127	421	1968.98129630745	491.243655163427	892.940857940364	102.585183620682	0.0894167967940084	NA
543679473	172	295	295	1522	Traced	LHPV4b2_R	250121817	FALSE	right	LHPV4b2	LHPV4b2	LHON	PDL16	glutamate	unknown	NA	NA	3.37163561076605	3	924	530	116	167	1413.59824035843	405.167366134966	476.100051942124	100.958610097516	0.0318454805657071	NA
881329355	166	257	257	1498	Traced	LHPV4b2_R	310276837	TRUE	right	LHPV4b2	LHPV4b2	LHON	PDL16	glutamate	unknown	NA	NA	3.19111570247934	3	809	595	94	144	1353.97987878324	357.128125336664	464.125444707884	130.68787340171	0.0198088511423585	NA
636465174	169	255	255	1612	Traced	LHPV4b2_R	271405882	TRUE	right	LHPV4b2	LHPV4b2	LHON	PDL16	glutamate	unknown	NA	NA	3.13688610240334	3	726	868	62	186	1268.54819532741	266.601076847186	547.255552216961	114.293621555556	0.0267951745890451	NA
665439889	107	352	352	1100	Traced	LHPV4b3_R	238038310	FALSE	right	LHPV4b3	LHPV4b3	LHLN	PDL16	glutamate	unknown	NA	NA	3.22326064382139	3	1010	90	117	235	1387.48548787341	418.045881204655	543.756314689512	10.6189650594521	0.294351352244358	NA
573695941	108	356	356	987	Traced	LHPV4b3_R	247245631	FALSE	right	LHPV4b3	LHPV4b3	LHLN	PDL16	glutamate	unknown	NA	NA	3.23353909465021	3	525	462	96	259	1321.28592413907	254.83668588935	625.947325828859	34.546679587803	0.0479074322458389	Local3 (Jeanne et al. Neuron 2018)
513323340	100	351	351	923	Traced	LHPV4b3_R	213871055	FALSE	right	LHPV4b3	LHPV4b3	LHLN	PDL16	glutamate	unknown	NA	NA	3.22666666666667	3	551	365	122	224	1273.74116079621	377.830146385326	495.063440455917	45.6669124844338	0.0424675175676058	NA
912022866	122	314	314	1223	Traced	LHPV4b3_R	178765844	FALSE	right	LHPV4b3	LHPV4b3	LHLN	PDL16	glutamate	unknown	NA	NA	3.1849173553719	3	960	204	121	175	1122.18532719237	422.250461125045	347.09864712992	68.9288314913871	0.129838847953559	NA
480931899	114	234	234	1086	Traced	LHPV4b4_R	247438407	TRUE	right	LHPV4b4	LHPV4b4	LHON	PDL16	glutamate	unknown	NA	NA	3.09638554216867	3	594	436	83	139	1135.84927432337	308.645352601757	392.316666172295	91.749884789829	0.0258893660700942	PV4b2 (Frechter et al. eLife 2019) (Dolan et al. eLife 2019)
5812980700	157	373	373	1491	Traced	LHPV4b4_R	240875511	FALSE	right	LHPV4b4	LHPV4b4	LHON	PDL16	glutamate	unknown	NA	NA	3.21052631578947	3	857	578	99	255	1422.14724320558	324.813649763707	622.460284537386	105.313186505622	0.0659000310602901	NA
512312176	123	217	217	1084	Traced	LHPV4b4_R	244056707	TRUE	right	LHPV4b4	LHPV4b4	LHON	PDL16	glutamate	unknown	NA	NA	3.07321965897693	3	775	284	97	115	1098.26872496833	394.553108014187	289.551734183301	108.054503476302	0.0504408776280685	NA
512982243	158	340	340	1347	Traced	LHPV4b4_R	253923359	TRUE	right	LHPV4b4	LHPV4b4	LHON	PDL16	glutamate	unknown	NA	NA	3.08366935483871	3	627	696	74	259	1387.40932293247	318.687831010745	632.108364774158	92.7386759965365	0.0441185816578743	PV4b2 (Frechter et al. eLife 2019) (Dolan et al. eLife 2019)
912022802	167	257	257	1344	Traced	LHPV4b4_R	303629297	TRUE	right	LHPV4b4	LHPV4b4	LHON	PDL16	glutamate	unknown	NA	NA	3.13480885311871	3	881	429	78	173	1371.56028456621	379.798240374323	513.927742721445	89.6711129437182	0.0825887624311843	PV4b2 (Frechter et al. eLife 2019) (Dolan et al. eLife 2019)
880988155	153	334	334	1666	Traced	LHPV4b5_R	265879851	TRUE	right	LHPV4b5	LHPV4b5	LHLN	PDL16	glutamate	unknown	NA	NA	3.25726141078838	3	658	930	93	240	1326.20451815134	344.600266082662	588.408741258068	13.6688451042289	0.0123459816443006	NA
881329648	164	367	367	1925	Traced	LHPV4b6_R	260311868	TRUE	right	LHPV4b6	LHPV4b6	LHLN	PDL16	glutamate	unknown	NA	NA	3.37525773195876	3	915	992	53	303	1429.79584843576	283.944888484784	666.511260118729	99.8152153455133	0.0759706031938682	NA
880987657	243	258	258	2269	Traced	LHPV4b7_R	406090224	TRUE	right	LHPV4b7	LHPV4b7	LHON	PDL16	glutamate	unknown	NA	NA	3.2497430626927	3	1463	738	103	153	1642.59443159235	519.557115201857	587.439919717497	76.7761489508225	0.0397703145343545	NA
5901195352	162	388	388	1892	Traced	LHPV4b8_R	260439246	TRUE	right	LHPV4b8	LHPV4b8	LHON	PDL16	glutamate	unknown	NA	NA	3.3913491246138	3	868	1013	54	330	1450.7412772386	243.972869322482	751.921741437158	57.4095222442296	0.0741741695801594	NA
604735961	190	551	551	1883	Traced	LHPV4b9_R	519441183	TRUE	right	LHPV4b9	LHPV4b9	LHON	PDL16	glutamate	unknown	NA	NA	3.82936918304033	4	1180	582	137	386	2039.68570848078	551.64469865906	838.929284065351	103.008179522061	0.112686245444938	NA
484018923	168	499	499	1628	Traced	LHPV4b9_R	456545333	TRUE	right	LHPV4b9	LHPV4b9	LHON	PDL16	glutamate	unknown	NA	NA	4.02085505735141	4	645	945	147	339	1967.46291106332	450.799014388442	969.960338899887	97.2087611447757	0.00760624758283912	NA
540998783	184	461	461	1614	Traced	LHPV4c1_a_R	329651768	TRUE	right	LHPV4c1_a	LHPV4c1_a	LHON	PDL16	glutamate	unknown	NA	NA	3.42930327868852	3	1236	351	303	149	1449.02988009756	553.888153548295	415.773501463935	56.7769426418699	0.00990008285384847	NA
633438933	188	518	518	1849	Traced	LHPV4c1_b_R	315161179	TRUE	right	LHPV4c1_b	LHPV4c1_b	LHON	PDL16	glutamate	unknown	NA	NA	3.44074844074844	3	966	826	150	362	1559.49434942117	370.538460394376	720.250519885769	31.9236444929809	0.0406317930571005	NA
694813676	162	339	339	1630	Traced	LHPV4c1_b_R	281507421	TRUE	right	LHPV4c1_b	LHPV4c1_b	LHON	PDL16	glutamate	unknown	NA	NA	3.4917695473251	3	691	880	86	247	1260.59229124695	194.662786700217	667.241987146546	44.6315997399305	0.0222552320210929	NA
694472338	178	371	371	1876	Traced	LHPV4c1_b_R	289129510	TRUE	right	LHPV4c1_b	LHPV4c1_b	LHON	PDL16	glutamate	unknown	NA	NA	3.33503054989817	3	532	1284	40	325	1346.51831437091	159.073630609568	739.394436492709	52.7751114245509	0.0310051110221096	NA
787908929	153	319	319	1579	Traced	LHPV4c1_b_R	289639453	TRUE	right	LHPV4c1_b	LHPV4c1_b	LHON	PDL16	glutamate	unknown	NA	NA	3.5885363357216	3	1236	313	196	119	1249.59586333594	536.944869765026	242.05473921608	53.8874934460345	0.0245457964887862	NA
757215581	140	355	355	1335	Traced	LHPV4c1_b_R	303954754	TRUE	right	LHPV4c1_b	LHPV4c1_b	LHON	PDL16	glutamate	unknown	NA	NA	3.41139896373057	3	468	793	53	296	1208.87532867817	161.641505805323	586.605936544369	64.6527584735407	0.0394857967741602	NA
5813022150	135	355	355	1451	Traced	LHPV4c1_c_R	335366046	TRUE	right	LHPV4c1_c	LHPV4c1_c	LHON	PDL16	glutamate	unknown	NA	NA	3.43094496365524	3	908	455	212	122	1457.56395104589	546.329023404541	347.96118128457	29.9027570373362	0.000696330083497787	NA
756870190	171	408	408	1928	Traced	LHPV4c1_c_R	363423485	TRUE	right	LHPV4c1_c	LHPV4c1_c	LHON	PDL16	glutamate	unknown	NA	NA	3.45284974093264	3	891	1009	149	255	1586.61344988096	430.775260521493	586.267515807155	60.1445469786757	0.00638565723396478	NA
5813058028	152	493	493	1770	Traced	LHPV4c1_c_R	261854484	FALSE	right	LHPV4c1_c	LHPV4c1_c	LHON	PDL16	glutamate	unknown	NA	NA	3.48	3	562	1208	146	345	1532.2566305412	376.01805412947	684.478740898669	35.4300667729635	0.000309105807677623	NA
5813108084	158	441	441	1687	Traced	LHPV4c1_c_R	219722143	FALSE	right	LHPV4c1_c	LHPV4c1_c	LHON	PDL16	glutamate	unknown	NA	NA	3.4012539184953	3	182	1490	29	408	1299.22649926243	121.489334551366	778.649874768844	39.1680406668367	0.00352142749916207	NA
633101926	155	436	436	1460	Traced	LHPV4c2_R	386786402	TRUE	right	LHPV4c2	LHPV4c2	LHON	PDL16	glutamate	unknown	NA	NA	3.58963730569948	4	1403	45	152	275	1750.02981150397	405.203974103544	766.254109153972	75.4869691111584	0.376011268842994	NA
386838814	171	596	596	1658	Traced	LHPV4c2_R	439808848	TRUE	right	LHPV4c2	LHPV4c2	LHON	PDL16	glutamate	unknown	NA	NA	3.6794208893485	4	1557	98	193	401	2011.53176474147	467.796395932162	953.619085179508	58.6228667200302	0.341776886792744	NA
325814461	123	539	539	1113	Traced	LHPV4c3_R	376282131	TRUE	right	LHPV4c3	LHPV4c3	LHON	PDL16	glutamate	unknown	NA	NA	3.32142857142857	4	934	175	251	287	1835.16047730418	694.464634605733	603.540008507878	51.8732205638008	0.117390800604483	NA
356153135	151	549	549	1260	Traced	LHPV4c3_R	366814210	TRUE	right	LHPV4c3	LHPV4c3	LHON	PDL16	glutamate	unknown	NA	NA	3.70393374741201	4	1083	174	165	379	2019.98322593814	488.543775926752	931.563364820686	58.8786334705837	0.246049175120662	NA
386833812	133	603	603	1133	Traced	LHPV4c4_a_R	330648117	TRUE	right	LHPV4c4_a	LHPV4c4_a	LHON	PDL16	glutamate	unknown	NA	NA	3.53353973168215	3	775	358	197	401	1718.91191045069	531.013287444692	762.336917732892	49.5894311774308	0.0904634414041711	NA
417204354	133	554	554	1181	Traced	LHPV4c4_a_R	257918861	FALSE	right	LHPV4c4_a	LHPV4c4_a	LHON	PDL16	glutamate	unknown	NA	NA	3.43613707165109	3	1005	163	205	340	1628.76030903417	506.161116881864	712.005802036436	40.0463108279876	0.190480626166152	NA
417890128	159	395	395	1412	Traced	LHPV4c4_b_R	275369712	TRUE	right	LHPV4c4_b	LHPV4c4_b	LHON	PDL16	glutamate	unknown	NA	NA	3.41769547325103	3	1077	325	128	267	1538.61090268573	438.869375952237	590.878483230512	37.1597888628418	0.138390824994373	NA
452672881	144	251	251	1424	Traced	LHPV4d1_R	193117950	FALSE	right	LHPV4d1	LHPV4d1	LHON	PDL08	glutamate	unknown	NA	NA	3.43295803480041	3	989	421	96	127	1291.95869201388	404.348156782417	449.488307055661	89.8359968490095	0.0459634526554894	NA
821642912	162	229	229	1483	Traced	LHPV4d1_R	244391132	FALSE	right	LHPV4d1	LHPV4d1	LHON	PDL08	glutamate	unknown	NA	NA	3.48825331971399	3	1001	449	102	110	1234.01056070805	404.265742839416	361.790914556592	90.702017843331	0.0271538776799907	NA
698846779	173	296	296	1814	Traced	LHPV4d10_R	266876748	TRUE	right	LHPV4d10	LHPV4d10	LHON	PDL08	glutamate	unknown	NA	NA	3.26299376299376	3	826	963	63	221	1334.72065275679	297.54125695843	546.074212176538	84.1771804245116	0.0371272557218005	NA
5813020038	143	288	288	1379	Traced	LHPV4d10_R	262874106	TRUE	right	LHPV4d10	LHPV4d10	LHON	PDL08	glutamate	unknown	NA	NA	3.44490216271885	3	616	744	97	184	1418.97674060407	338.355609038973	569.051411403951	104.095952745397	0.0074526515233253	NA
728858272	138	144	144	1416	Traced	LHPV4d10_R	216866863	TRUE	right	LHPV4d10	LHPV4d10	LHON	PDL08	glutamate	unknown	NA	NA	3.20615384615385	3	687	637	34	100	984.388134417282	199.276444787598	373.370571609259	106.852844671409	0.0398681780855772	NA
578155687	147	274	274	1721	Traced	LHPV4d2_R	255057569	TRUE	right	LHPV4d2	LHPV4d2	LHON	PDL08	glutamate	unknown	NA	NA	3.59282051282051	4	960	745	85	180	1209.86681510862	259.840311252044	462.562520838849	132.367639078533	0.0351550617866473	NA
608162891	106	172	172	1073	Traced	LHPV4d2_R	201907417	TRUE	right	LHPV4d2	LHPV4d2	LHON	PDL08	glutamate	unknown	NA	NA	3.5547520661157	4	615	412	62	92	991.008374150329	277.482557148651	323.651398392715	127.322127644977	0.0227893264415568	NA
5901195066	149	232	232	1637	Traced	LHPV4d2_R	250386653	TRUE	right	LHPV4d2	LHPV4d2	LHON	PDL08	glutamate	unknown	NA	NA	3.60144927536232	4	922	715	97	127	1186.6837032849	332.644410122277	408.037598495873	117.423174483637	0.00980377870256299	NA
482006328	92	234	234	759	Traced	LHPV4d3_R	271797268	TRUE	right	LHPV4d3	LHPV4d3	LHON	PDL08	glutamate	unknown	NA	NA	4.12487205731832	4	576	165	130	94	1208.06792818222	392.008522604446	397.888410655651	90.2495619481782	0.030615499179047	NA
514060419	112	203	203	938	Traced	LHPV4d3_R	252597735	TRUE	right	LHPV4d3	LHPV4d3	LHON	PDL08	glutamate	unknown	NA	NA	3.7979381443299	4	698	183	123	61	1076.03169922936	391.779738994545	253.503116350575	68.5690986556532	0.0125955833245057	NA
514747179	96	173	173	836	Traced	LHPV4d3_R	161813177	FALSE	right	LHPV4d3	LHPV4d3	LHON	PDL08	glutamate	unknown	NA	NA	3.54051282051282	4	504	267	42	112	1004.78854170087	189.118226155664	413.479289655021	74.2256118117938	0.0921304811586006	NA
450919762	181	449	449	1812	Traced	LHPV4d4_R	432201496	TRUE	right	LHPV4d4	LHPV4d4	LHON	PDL08	glutamate	unknown	NA	NA	4.0966735966736	4	1256	531	210	221	1710.04907611917	567.517466235852	570.719028742389	106.434449657273	0.0316255001299018	NA
696791034	167	444	444	1635	Traced	LHPV4d4_R	412090335	TRUE	right	LHPV4d4	LHPV4d4	LHON	PDL08	glutamate	unknown	NA	NA	4.02492211838006	4	851	738	87	333	1718.39072482971	284.064727970251	823.16883002913	32.8321783198742	0.0742463813481453	NA
389917104	95	197	197	724	Traced	LHPV4d5_R	257548289	TRUE	right	LHPV4d5	LHPV4d5	LHON	PDL08	glutamate	unknown	NA	NA	4.05268595041322	4	549	115	96	90	1140.55691155684	298.508306987935	433.902283613914	115.269749731188	0.0776813636600481	PV4d1 (Frechter et al. eLife 2019) (Dolan et al. eLife 2019)
541957126	127	213	213	1047	Traced	LHPV4d5_R	313602117	TRUE	right	LHPV4d5	LHPV4d5	LHON	PDL08	glutamate	unknown	NA	NA	3.85211995863495	4	859	172	115	94	1388.75515192694	416.603560031455	535.40524572291	81.6980274704471	0.0640825938443806	PV4d1 (Frechter et al. eLife 2019) (Dolan et al. eLife 2019)
852993150	216	475	475	2079	Traced	LHPV4d6_R	466097211	TRUE	right	LHPV4d6	LHPV4d6	LHON	PDL08	glutamate	unknown	NA	NA	3.52582644628099	4	1130	881	179	258	1922.30328981949	557.497303631072	697.667322886991	143.973290465245	0.0145656776918239	NA
359223830	203	378	378	2021	Traced	LHPV4d6_R	409535830	TRUE	right	LHPV4d6	LHPV4d6	LHON	PDL08	glutamate	unknown	NA	NA	3.75826446280992	4	1268	711	196	176	1646.60842060965	653.846886066826	530.415777526537	89.6808963815447	0.00823773778905945	NA
821621397	219	441	441	2152	Traced	LHPV4d7_R	408601564	TRUE	right	LHPV4d7	LHPV4d7	LHON	PDL08	glutamate	unknown	NA	NA	3.75686673448627	4	1057	1049	160	268	1682.15838092904	404.02289874899	723.454647156064	125.461656310172	0.0102677589453983	NA
329258532	209	469	469	1966	Traced	LHPV4d7_R	450249282	TRUE	right	LHPV4d7	LHPV4d7	LHON	PDL08	glutamate	unknown	NA	NA	3.5071283095723	4	970	986	155	302	1813.99466675132	514.795034909139	779.913476923297	70.4180242337976	0.015902415912359	NA
821617263	196	369	369	2219	Traced	LHPV4d7_R	356706830	TRUE	right	LHPV4d7	LHPV4d7	LHON	PDL08	glutamate	unknown	NA	NA	3.77183967112025	4	1112	988	134	226	1469.10792644614	386.964493010141	557.178641717291	125.723432392895	0.0149805485389296	NA
516085453	107	167	167	1161	Traced	LHPV4d8_R	152397437	FALSE	right	LHPV4d8	LHPV4d8	LHON	PDL08	glutamate	unknown	NA	NA	3.33197139938713	3	759	358	56	95	1059.18129742999	305.398596533267	350.948438634274	104.516338934155	0.0568217984038492	NA
483004258	125	232	232	1085	Traced	LHPV4d9_R	264756105	TRUE	right	LHPV4d9	LHPV4d9	LHON	PDL08	glutamate	unknown	NA	NA	3.79855371900826	4	751	319	100	127	1340.33002208756	386.206160781317	504.363187917215	86.694566158928	0.0449771044828613	NA
942677658	122	180	180	1130	Traced	LHPV4f1_a_R	245869989	TRUE	right	LHPV4f1_a	LHPV4f1_a	LHLN	PDL08	glutamate	unknown	NA	NA	3.07178968655207	3	501	629	38	139	1265.41715941485	374.630730418614	536.664035687632	67.7843413443383	0.0342036193097639	PV4a3 (Dolan et al. eLife 2019)
790918021	140	191	191	1143	Traced	LHPV4f1_b_R	195800092	FALSE	right	LHPV4f1_b	LHPV4f1_b	LHLN	PDL08	glutamate	unknown	NA	NA	3.71618852459016	4	682	461	27	164	1186.20672581048	285.324276429328	581.13969887499	13.4509106778801	0.134023715394099	NA
573774122	204	282	282	1896	Traced	LHPV4g1_R	324627653	TRUE	right	LHPV4g1	LHPV4g1	LHON	PDL16	glutamate	unknown	NA	NA	3.23243801652893	3	921	929	59	216	1432.69326457723	322.799452355774	636.482909878722	60.5734887238066	0.0503769617440724	PV4c3 (Dolan et al. eLife 2019)
944379777	139	290	290	1283	Traced	LHPV4g1_R	184785794	FALSE	right	LHPV4g1	LHPV4g1	LHON	PDL16	glutamate	unknown	NA	NA	3.33026584867076	3	540	740	45	234	1209.56323227314	171.685348276936	608.367728453221	81.5870483775139	0.0501967738555547	PV4c3 (Dolan et al. eLife 2019)
880987844	227	355	355	2145	Traced	LHPV4g1_R	327501593	TRUE	right	LHPV4g1	LHPV4g1	LHON	PDL16	glutamate	unknown	NA	NA	3.19734151329243	3	1612	457	240	107	1507.67596654816	717.904932522838	232.623721138319	103.034084063446	0.00605844811302059	PV4c3 (Dolan et al. eLife 2019)
5813020002	169	339	339	1555	Traced	LHPV4g1_R	235954225	TRUE	right	LHPV4g1	LHPV4g1	LHON	PDL16	glutamate	unknown	NA	NA	3.13440320962889	3	593	912	86	242	1314.16047112044	229.626942182097	565.829113408882	114.606082212502	0.0121386263839015	PV4c3 (Dolan et al. eLife 2019)
913341138	158	371	371	1333	Traced	LHPV4g1_R	213685705	TRUE	right	LHPV4g1	LHPV4g1	LHON	PDL16	glutamate	unknown	NA	NA	3.2517911975435	3	358	971	18	340	1226.89811893685	103.209790187405	662.628966812109	107.709474105675	0.0565591651208452	NA
821272765	150	274	274	1344	Traced	LHPV4g1_R	185076186	TRUE	right	LHPV4g1	LHPV4g1	LHON	PDL16	glutamate	unknown	NA	NA	3.18844984802432	3	450	848	69	192	1131.83961323706	180.374447153401	483.666010014776	105.613197985788	0.00486010218600053	NA
943048975	114	380	380	1098	Traced	LHPV4g1_R	136988222	FALSE	right	LHPV4g1	LHPV4g1	LHON	PDL16	glutamate	unknown	NA	NA	3.34746639089969	3	344	754	12	366	1224.97894935731	116.138777956111	764.283409613796	55.3736963987268	0.0947527599988814	NA
417554241	139	349	349	1406	Traced	LHPV4g2_R	270673013	TRUE	right	LHPV4g2	LHPV4g2	LHON	PDL16	glutamate	unknown	NA	NA	3.50414078674948	3	1277	127	137	209	1338.37208665167	410.077585991282	517.14223161097	44.0340858768467	0.226883140577578	PV4c3 (Dolan et al. eLife 2019)
449289591	153	429	429	1554	Traced	LHPV4g2_R	255015584	FALSE	right	LHPV4g2	LHPV4g2	LHON	PDL16	glutamate	unknown	NA	NA	3.46961894953656	3	1405	134	145	271	1552.21840902906	357.371540122051	670.91494340515	79.6888674949994	0.270099584466958	NA
850294342	151	361	361	1500	Traced	LHPV4g2_R	339843616	TRUE	right	LHPV4g2	LHPV4g2	LHON	PDL16	glutamate	unknown	NA	NA	3.38819875776398	3	1329	113	157	199	1440.41877245191	405.460921739689	522.584997292957	74.5912872312109	0.211448685065382	NA
729954382	64	114	114	573	Traced	LHPV4h1_a_R	176407099	TRUE	right	LHPV4h1_a	LHPV4h1_a	LHON	PDL08	glutamate	unknown	NA	NA	3.38114754098361	3	481	87	33	78	701.034134250302	205.555645645052	233.966102776664	92.8713735542948	0.217477681069014	NA
666481389	77	134	134	694	Traced	LHPV4h1_a_R	193687327	TRUE	right	LHPV4h1_a	LHPV4h1_a	LHON	PDL08	glutamate	unknown	NA	NA	3.1946446961895	3	458	191	27	102	784.532838472204	185.602375269399	265.749842683418	101.101375291515	0.159914419718447	NA
5813012970	102	244	244	978	Traced	LHPV4h1_b_R	278533147	TRUE	right	LHPV4h1_b	LHPV4h1_b	LHON	PDL08	glutamate	unknown	NA	NA	3.23329907502569	3	752	226	65	177	1096.5300462979	314.200602486841	485.706576211504	87.2480119699828	0.171927651647727	NA
388854495	149	354	354	1546	Traced	LHPV4h2_R	283854429	FALSE	right	LHPV4h2	LHPV4h2	LHON	PDL08	glutamate	unknown	NA	NA	3.76361767728674	4	599	898	47	304	1657.73204388947	202.999525605156	923.364996951315	19.7660653266626	0.0558828882694363	NA
667824200	346	509	509	3705	Traced	LHPV4h3_R	625366832	TRUE	right	LHPV4h3	LHPV4h3	LHON	PDL08	glutamate	unknown	NA	NA	3.38149688149688	3	2036	1642	146	347	2272.30895353154	528.35023957085	946.512465063044	131.596694674621	0.0388478086645196	NA
759888465	154	390	390	1366	Traced	LHPV4i1_R	206017832	FALSE	right	LHPV4i1	LHPV4i1	LHLN	PDL08	glutamate	unknown	NA	NA	3.16803278688525	3	877	489	62	324	1394.64133395444	189.187832354464	760.575063558893	66.7849702657052	0.161043278414809	NA
699515201	184	573	573	1746	Traced	LHPV4i1_R	250279972	TRUE	right	LHPV4i1	LHPV4i1	LHLN	PDL08	glutamate	unknown	NA	NA	3.23578076525336	3	714	1024	56	515	1673.174721903	188.971014192812	1008.89139723363	52.3235206030882	0.0850578792724492	NA
760569606	168	436	436	1559	Traced	LHPV4i1_R	250484217	TRUE	right	LHPV4i1	LHPV4i1	LHLN	PDL08	glutamate	unknown	NA	NA	3.16459627329193	3	792	767	48	387	1518.7002787059	172.479718436565	832.114768243403	47.9569499239356	0.120313914469341	PV4a6 (Frechter et al. eLife 2019) (Dolan et al. eLife 2019)
729535748	108	242	242	1011	Traced	LHPV4i2_R	290032092	TRUE	right	LHPV4i2	LHPV4i2	LHLN	PDL08	glutamate	unknown	NA	NA	3.31513903192585	3	809	185	71	169	1202.72138170884	280.376616186337	488.013069593753	61.7639497232618	0.191067412707437	NA
5813041163	132	125	125	1314	Traced	LHPV4i3_a_R	221472916	TRUE	right	LHPV4i3_a	LHPV4i3_a	LHLN	PDL08	glutamate	unknown	NA	NA	3.15734989648033	3	1179	124	10	113	925.263023585414	173.65749604396	357.373902970951	74.9301579583514	0.470661869428549	NA
543002278	108	82	82	1009	Traced	LHPV4i3_a_R	152739010	FALSE	right	LHPV4i3_a	LHPV4i3_a	LHLN	PDL08	glutamate	unknown	NA	NA	3.0751269035533	3	898	84	10	67	785.740268280563	146.593078192918	246.109288616077	77.6114869387967	0.424798056116151	NA
480931876	89	61	61	772	Traced	LHPV4i3_b_R	175295847	TRUE	right	LHPV4i3_b	LHPV4i3_b	LHLN	PDL08	glutamate	unknown	NA	NA	3.229	3	684	84	18	35	740.537161310298	192.041550740673	199.156487312188	77.0222594457624	0.207051708913764	NA
974732162	99	69	69	958	Traced	LHPV4i3_b_R	126969232	FALSE	right	LHPV4i3_b	LHPV4i3_b	LHLN	PDL08	glutamate	unknown	NA	NA	3.1969387755102	3	781	147	23	43	759.427904370065	213.848666666039	208.027501776786	88.4614891344517	0.151322611943155	NA
359524536	283	397	397	2906	Traced	LHPV4i4_R	510338251	TRUE	right	LHPV4i4	LHPV4i4	LHON	PDL08	glutamate	unknown	NA	NA	3.43962848297214	3	1600	1255	129	263	2012.67035847437	455.434842619673	856.333484475507	105.575796603994	0.0312740350115088	NA
634029702	152	228	228	1475	Traced	LHPV4i5_R	313865758	TRUE	right	LHPV4i5	LHPV4i5	LHLN	PDL08	glutamate	unknown	NA	NA	3.47471620227038	3	1111	306	107	102	1411.74889781122	601.300790426845	329.273282778128	35.5337123922766	0.0511405223654031	NA
541956768	221	367	367	2113	Traced	LHPV4i5_R	396056698	TRUE	right	LHPV4i5	LHPV4i5	LHON	PDL08	glutamate	unknown	NA	NA	3.41658137154555	3	761	1350	69	298	1842.42902270727	370.034394894213	885.336563393614	40.1679831774369	0.0218385773634471	NA
759888294	188	342	342	1912	Traced	LHPV4j1_a_R	267551790	TRUE	right	LHPV4j1_a	LHPV4j1_a	LHLN	PDL08	glutamate	unknown	NA	NA	3.27950310559006	3	1241	658	162	168	1513.22394325476	465.806891039358	625.828594638549	30.9311744211023	0.0165510401877157	NA
760570054	191	453	453	1928	Traced	LHPV4j1_b_R	288257857	TRUE	right	LHPV4j1_b	LHPV4j1_b	LHLN	PDL08	glutamate	unknown	NA	NA	3.29824561403509	3	1340	588	176	264	1590.59040088635	471.059805054005	653.682945270462	112.172945582191	0.0572858673106272	NA
667486204	460	1119	1119	4322	Traced	LHPV4j2_R	614486316	FALSE	right	LHPV4j2	LHPV4j2	LHLN	PDL08	glutamate	unknown	NA	NA	3.34818652849741	3	3115	1100	654	446	3444.57905660597	1715.27713268272	822.6393838714	71.7092969225358	0.0155709254910634	NA
5813040727	865	532	532	9113	Traced	LHPV4j3_R	1295027530	TRUE	right	LHPV4j3	LHPV4j3	LHON	PDL08	glutamate	unknown	NA	NA	3.19607843137255	3	8034	997	365	157	3723.71983441473	2180.08107762743	637.614482429041	96.0144487477659	0.0317744264890732	NA
604731022	715	489	489	7418	Traced	LHPV4j4_R	801814828	FALSE	right	LHPV4j4	LHPV4j4	LHLN	PDL08	glutamate	unknown	NA	NA	3.09326424870466	3	4030	3388	181	307	3173.81691186901	985.365309929448	1219.86272963967	21.722956243998	0.0149680536383088	PV4a5 (Dolan et al. eLife 2019)
851314221	120	213	213	1055	Traced	LHPV4k1_a_R	209948721	FALSE	right	LHPV4k1_a	LHPV4k1_a	LHON	PDL08	glutamate	unknown	NA	NA	3.07448979591837	3	419	597	32	179	1152.45564128848	206.107321689141	593.592556812164	86.607279866264	0.0507317160971115	PV4a5 (Frechter et al. eLife 2019) (Dolan et al. eLife 2019); Local4 (Jeanne et al. Neuron 2018)
790918006	135	219	219	1077	Traced	LHPV4k1_b_R	286459701	TRUE	right	LHPV4k1_b	LHPV4k1_b	LHON	PDL08	glutamate	unknown	NA	NA	3.1733746130031	3	553	470	40	174	1178.44820078582	216.584281850698	582.388379813121	102.029277218025	0.0834795950834568	NA
790577606	113	237	237	973	Traced	LHPV4k1_b_R	271032017	TRUE	right	LHPV4k1_b	LHPV4k1_b	LHON	PDL08	glutamate	unknown	NA	NA	3.2146490335707	3	690	283	47	187	1081.96878268566	273.302133786222	506.015317846721	87.9756821208343	0.173261912307277	NA
357146296	376	1194	1194	3433	Traced	LHPV4l1_R	1162566029	TRUE	right	LHPV4l1	LHPV4l1	LHON	PDL16	glutamate	unknown	NA	NA	3.74457083764219	4	2819	562	863	296	4177.62675076222	2160.43643169846	871.917776510882	195.627156745643	0.00826389613371892	PV4b2 (Dolan et al. eLife 2019)
518899665	1255	3933	3933	11416	Traced	LHPV4m1_R	1660588602	TRUE	right	LHPV4m1	LHPV4m1	LHON	PDL08	glutamate	unknown	NA	NA	4.66049382716049	5	2364	8651	264	3628	7223.97972227522	352.987918668813	5265.9164227473	134.47837242447	0.0291468934062004	NA
573333284	192	519	519	1682	Traced	LHPV5a1_a_R	404957799	TRUE	right	LHPV5a1_a	LHPV5a1_a	LHON	PDL19	acetylcholine	unknown	NA	NA	3.52479338842975	3	1115	528	138	367	1769.39493559149	221.691398216273	930.710267716831	139.484099126069	0.111917538971442	NA
609941228	220	559	559	1718	Traced	LHPV5a1_a_R	392538007	TRUE	right	LHPV5a1_a	LHPV5a1_a	LHON	PDL19	acetylcholine	unknown	NA	NA	3.46137787056367	3	1117	597	123	427	1839.27870614004	227.823717544288	1069.75745116838	154.886029109848	0.126460124285793	NA
573683455	158	439	439	1477	Traced	LHPV5a1_a_R	328978999	TRUE	right	LHPV5a1_a	LHPV5a1_a	LHON	PDL19	acetylcholine	unknown	NA	NA	3.52012383900929	3	1169	290	94	339	1558.35039954578	171.688063430282	892.967474976398	134.438416674074	0.244666600104996	NA
604368022	177	441	441	1542	Traced	LHPV5a1_a_R	350720369	TRUE	right	LHPV5a1_a	LHPV5a1_a	LHON	PDL19	acetylcholine	unknown	NA	NA	3.44260599793175	3	1057	391	87	343	1625.31139955786	170.524255508902	931.162836572607	144.757174004391	0.193448170650547	PV5a2 (Frechter et al. eLife 2019) (Dolan et al. eLife 2019)
546511447	88	148	148	777	Traced	LHPV5a1_b_R	244744368	TRUE	right	LHPV5a1_b	LHPV5a1_b	LHON	PDL19	acetylcholine	unknown	NA	NA	4.41945288753799	4	733	23	83	54	998.392240485146	232.60507818892	357.590381252114	142.928733053841	0.176226696762952	NA
573333903	117	197	197	1051	Traced	LHPV5a1_b_R	284987126	TRUE	right	LHPV5a1_b	LHPV5a1_b	LHON	PDL19	acetylcholine	unknown	NA	NA	3.82425488180884	4	923	34	77	110	1086.87891533331	173.827353633432	482.70148287966	157.77673873354	0.312883776988725	NA
577546843	98	131	131	871	Traced	LHPV5a1_b_R	264911995	TRUE	right	LHPV5a1_b	LHPV5a1_b	LHON	PDL19	acetylcholine	unknown	NA	NA	3.55295315682281	4	796	29	48	72	979.603741450761	223.856409330442	359.564583624505	136.065634430669	0.319455879170175	PV5a2 (Frechter et al. eLife 2019) (Dolan et al. eLife 2019)
573670049	191	477	477	1421	Traced	LHPV5a2_R	353393953	TRUE	right	LHPV5a2	LHPV5a2	LHON	PDL19	acetylcholine	unknown	NA	NA	3.51685393258427	4	818	515	100	373	1521.49401965134	226.910166257233	905.91016619639	143.314152753298	0.113972485633077	NA
579576294	172	524	524	1310	Traced	LHPV5a2_R	287636170	TRUE	right	LHPV5a2	LHPV5a2	LHON	PDL19	acetylcholine	unknown	NA	NA	3.54875518672199	4	764	531	124	397	1476.51956702484	235.453488398493	889.133582000978	139.624809515216	0.0880698641582762	NA
727838223	101	214	214	661	Traced	LHPV5a2_R	242347906	TRUE	right	LHPV5a2	LHPV5a2	LHON	PDL19	acetylcholine	unknown	NA	NA	3.86203319502075	4	555	71	61	149	1040.0999787709	251.218294286538	488.308702009046	127.719235357123	0.284202323600508	PV5b1 (Frechter et al. eLife 2019) (Dolan et al. eLife 2019)
696432315	153	269	269	1238	Traced	LHPV5a2_R	296454227	TRUE	right	LHPV5a2	LHPV5a2	LHON	PDL19	acetylcholine	unknown	NA	NA	3.74560496380558	4	915	259	55	209	1123.67899697663	203.392264027734	612.952760570258	158.478237727273	0.222644202000678	NA
481268762	109	235	235	857	Traced	LHPV5a3_R	241377218	TRUE	right	LHPV5a3	LHPV5a3	LHON	PDL19	acetylcholine	unknown	NA	NA	3.61036269430052	4	716	74	71	153	994.535094609964	201.019635684001	411.036212948446	136.045328833507	0.286957549611374	NA
265120223	34	50	50	214	Traced	LHPV5a3_R	117661700	TRUE	right	LHPV5a3	LHPV5a3	LHON	PDL19	acetylcholine	unknown	NA	NA	4.42551020408163	4	85	81	17	21	364.678557816903	41.4881979744013	71.8738002636839	168.267869036603	0.00264191415319126	NA
264779403	136	208	208	1063	Traced	LHPV5a3_R	236422300	TRUE	right	LHPV5a3	LHPV5a3	LHON	PDL19	acetylcholine	unknown	NA	NA	3.90796277145812	4	818	141	85	102	911.419597823057	227.213980522227	343.158937035612	160.243212134001	0.123240117296561	NA
265120324	104	180	180	852	Traced	LHPV5a3_R	252814905	TRUE	right	LHPV5a3	LHPV5a3	LHON	PDL19	acetylcholine	unknown	NA	NA	4.08997955010225	4	571	136	72	90	886.993861919291	151.86280247149	405.526493264554	172.759176884	0.0971167804228394	NA
264783939	112	236	236	868	Traced	LHPV5a3_R	268049376	TRUE	right	LHPV5a3	LHPV5a3	LHON	PDL19	acetylcholine	unknown	NA	NA	3.72119341563786	4	719	55	72	150	1092.98050094115	183.981044345585	485.017967646927	143.12698102087	0.317978155508295	NA
5813009281	107	352	352	872	Traced	LHPV5a4_R	263672140	TRUE	right	LHPV5a4	LHPV5a4	LHON	PDL19	acetylcholine	unknown	NA	NA	3.88223140495868	4	761	40	119	226	1253.94241978084	231.647549020991	629.503624694229	115.057550421945	0.342038161884849	NA
5812980156	128	467	467	902	Traced	LHPV5a4_R	298914035	TRUE	right	LHPV5a4	LHPV5a4	LHON	PDL19	acetylcholine	unknown	NA	NA	3.90092879256966	4	789	70	181	274	1547.96986876659	301.276536589248	737.005241001059	119.640387354786	0.244278399235234	NA
451355706	99	171	171	743	Traced	LHPV5a5_R	225123642	TRUE	right	LHPV5a5	LHPV5a5	LHON	PDL19	acetylcholine	unknown	NA	NA	4.28542510121457	4	585	136	98	67	918.245614416617	162.783599715358	344.088025313441	136.037331974295	0.03824242395168	NA
572651463	94	213	213	720	Traced	LHPV5a5_R	244608350	TRUE	right	LHPV5a5	LHPV5a5	LHON	PDL19	acetylcholine	unknown	NA	NA	4.03490759753593	4	604	116	108	103	1104.03463424307	239.620825349102	450.673469507901	123.405329578211	0.0879044888882577	NA
513058708	136	137	137	955	Traced	LHPV5b1_R	276505461	TRUE	right	LHPV5b1	LHPV5b1	LHON	PDL22	acetylcholine	unknown	NA	NA	5.15995975855131	4	798	12	62	47	1064.05359943991	292.894498869586	331.328703996395	210.323688795436	0.245303118596538	NA
730325440	88	141	141	619	Traced	LHPV5b1_R	214844086	TRUE	right	LHPV5b1	LHPV5b1	LHON	PDL22	acetylcholine	unknown	NA	NA	4.25929648241206	4	405	105	47	65	980.321433523473	234.971794036286	342.590020716396	197.980340417418	0.100009492257701	PV5b2 (Dolan et al. eLife 2019)
634741770	158	153	153	1118	Traced	LHPV5b1_R	334187510	TRUE	right	LHPV5b1	LHPV5b1	LHON	PDL22	acetylcholine	unknown	NA	NA	4.3515704154002	4	846	88	61	60	1109.25135758427	340.294608547744	312.494134742378	231.399173009952	0.139242328144738	PV5b2 (Frechter et al. eLife 2019)
5901196176	21	88	88	130	Traced	LHPV5b1_R	229822394	TRUE	right	LHPV5b1	LHPV5b1	LHON	PDL22	acetylcholine	unknown	NA	NA	3.58022199798184	4	0	49	10	60	742.838472781242	16.3228683942616	381.080654551755	160.76024411415	0.069767493730527	NA
482974860	162	115	115	1260	Traced	LHPV5b1_R	340287658	TRUE	right	LHPV5b1	LHPV5b1	LHON	PDL22	acetylcholine	unknown	NA	NA	4.17907444668008	4	1039	49	53	43	927.62389327289	271.109070816638	203.316864834412	266.151400052861	0.172769771286248	NA
513050445	111	135	135	801	Traced	LHPV5b1_R	253236500	TRUE	right	LHPV5b1	LHPV5b1	LHON	PDL22	acetylcholine	unknown	NA	NA	4.6894472361809	4	712	0	70	33	981.587623472043	269.440047466823	250.992738790096	272.298695211895	0.237819062067726	PV5b2 (Dolan et al. eLife 2019)
731917767	153	133	133	1241	Traced	LHPV5b1_R	334136983	TRUE	right	LHPV5b1	LHPV5b1	LHON	PDL22	acetylcholine	unknown	NA	NA	4.71068548387097	4	1046	22	64	36	997.453326296769	309.35434975258	231.758351856816	248.63516739742	0.170361580028016	PV5b2 (Frechter et al. eLife 2019)
456083341	59	180	180	431	Traced	LHPV5b2_a_R	214113953	TRUE	right	LHPV5b2_a	LHPV5b2_a	LHON	PDL22	acetylcholine	unknown	NA	NA	3.49844559585492	3	290	137	41	138	817.312046324471	185.086379516082	366.058148930295	77.7738345278611	0.144617594503862	NA
912049625	39	113	113	353	Traced	LHPV5b2_a_R	224207199	TRUE	right	LHPV5b2_a	LHPV5b2_a	LHON	PDL22	acetylcholine	unknown	NA	NA	3.28425357873211	3	222	102	11	101	756.129091153586	116.043803139494	343.630063299798	115.723944596131	0.255181911541699	NA
487795196	99	193	193	767	Traced	LHPV5b2_b_R	263152780	TRUE	right	LHPV5b2_b	LHPV5b2_b	LHON	PDL22	acetylcholine	unknown	NA	NA	3.72349272349272	4	665	102	58	131	1043.79824594807	283.547438337036	418.529255922987	115.026666890012	0.239174801455466	NA
5813048346	135	158	158	1077	Traced	LHPV5b2_b_R	313660226	TRUE	right	LHPV5b2_b	LHPV5b2_b	LHON	PDL22	acetylcholine	unknown	NA	NA	3.92091571279917	4	802	205	51	98	995.813625666896	186.80594012771	384.096712114069	232.215310077668	0.135964568237292	NA
634069028	125	189	189	916	Traced	LHPV5b2_b_R	250212248	TRUE	right	LHPV5b2_b	LHPV5b2_b	LHON	PDL22	acetylcholine	unknown	NA	NA	3.5593395252838	4	716	130	42	135	958.32587321824	158.876590911484	375.884850223945	218.138117600561	0.26585394485965	NA
5812981168	91	271	271	720	Traced	LHPV5b2_c_R	253066253	TRUE	right	LHPV5b2_c	LHPV5b2_c	LHON	PDL22	acetylcholine	unknown	NA	NA	3.76180698151951	4	590	122	78	191	1067.49964838685	268.395651005415	405.600295829316	117.963269025557	0.218979702432792	NA
5901203559	102	204	204	759	Traced	LHPV5b2_c_R	275409192	TRUE	right	LHPV5b2_c	LHPV5b2_c	LHON	PDL22	acetylcholine	unknown	NA	NA	3.56171548117155	4	621	107	62	135	1061.54754464012	215.662297162762	391.074942957923	209.757825295603	0.219305563337184	NA
573005505	199	188	188	1519	Traced	LHPV5b3_R	344814125	TRUE	right	LHPV5b3	LHPV5b3	LHON	PDL22	acetylcholine	unknown	NA	NA	4.32443531827515	4	1266	220	62	115	1110.69147417414	304.39265073735	372.889719285541	205.877002083939	0.173417006306167	NA
851027931	153	148	148	1230	Traced	LHPV5b3_R	302689053	TRUE	right	LHPV5b3	LHPV5b3	LHON	PDL22	acetylcholine	unknown	NA	NA	4.36	4	1083	69	70	70	948.213780936507	287.519407130239	228.706227520885	210.855458889696	0.187161932816059	NA
705722260	161	157	157	1401	Traced	LHPV5b3_R	324680791	TRUE	right	LHPV5b3	LHPV5b3	LHON	PDL22	acetylcholine	unknown	NA	NA	4.23991726990693	4	1401	0	71	82	999.344761969245	387.554663315971	235.753055430821	179.623165980141	0.430848984405301	NA
575750788	173	188	188	1512	Traced	LHPV5b3_R	360662755	TRUE	right	LHPV5b3	LHPV5b3	LHON	PDL22	acetylcholine	unknown	NA	NA	4.55487179487179	4	1375	34	70	110	1109.17765029242	328.132786916922	360.078827331969	206.235092835525	0.360733743259455	NA
701577869	143	142	142	1223	Traced	LHPV5b3_R	327731758	TRUE	right	LHPV5b3	LHPV5b3	LHON	PDL22	acetylcholine	unknown	NA	NA	4.61220268872802	4	1152	32	65	75	895.882308745954	294.1370884725	216.12408065613	205.137283019697	0.286271512367043	NA
641631962	165	206	206	1493	Traced	LHPV5b4_a_R	331520225	TRUE	right	LHPV5b4_a	LHPV5b4_a	LHON	PDL22	acetylcholine	unknown	NA	NA	4.49070247933884	4	1357	0	98	91	1001.80638961473	379.209643817437	263.081676456218	197.709380858733	0.374730059562055	NA
641631806	164	238	238	1464	Traced	LHPV5b4_a_R	387901384	TRUE	right	LHPV5b4_a	LHPV5b4_a	LHON	PDL22	acetylcholine	unknown	NA	NA	4.01538461538462	4	1448	4	106	125	1161.72663960755	377.667750328635	382.508562101509	177.151863830269	0.398680070702339	NA
611274992	157	179	179	1267	Traced	LHPV5b4_b_R	347623560	TRUE	right	LHPV5b4_b	LHPV5b4_b	LHON	PDL22	acetylcholine	unknown	NA	NA	4.03933747412008	4	1142	33	92	78	1071.58894541122	444.717366265726	283.63387142013	177.994948591745	0.226311759865811	NA
484355342	78	138	138	568	Traced	LHPV5b5_R	238278271	TRUE	right	LHPV5b5	LHPV5b5	LHON	PDL22	acetylcholine	unknown	NA	NA	3.96016343207354	4	449	0	51	66	870.764113282558	230.585274220537	258.154407020072	213.712624474641	0.428855158880835	PV5b2 (Dolan et al. eLife 2019)
794333532	68	111	111	465	Traced	LHPV5b5_R	216383260	TRUE	right	LHPV5b5	LHPV5b5	LHON	PDL22	acetylcholine	unknown	NA	NA	4.42813141683778	4	377	0	48	44	852.313181218951	176.918730971329	201.514461541304	277.142090666155	0.354513044467531	NA
487467388	95	195	195	643	Traced	LHPV5b6_R	281799978	TRUE	right	LHPV5b6	LHPV5b6	LHON	PDL22	acetylcholine	unknown	NA	NA	4.2267620020429	4	555	10	71	119	1126.40483225741	197.145921230559	414.15969675164	187.746775301485	0.397719023460131	NA
580244333	85	206	206	518	Traced	LHPV5b6_R	291085462	TRUE	right	LHPV5b6	LHPV5b6	LHON	PDL22	acetylcholine	unknown	NA	NA	4.43814432989691	4	462	20	55	139	1125.58180622579	166.205621106363	507.726960111263	197.956273966441	0.419186643620913	NA
5813047222	79	246	246	483	Traced	LHPV5b6_R	311560198	TRUE	right	LHPV5b6	LHPV5b6	LHON	PDL22	acetylcholine	unknown	NA	NA	4.309670781893	4	419	10	73	168	1152.70348928198	209.03215063225	480.514996548573	153.053014243382	0.440027981937998	NA
5813048099	81	231	231	593	Traced	LHPV5b6_R	282332976	TRUE	right	LHPV5b6	LHPV5b6	LHON	PDL22	acetylcholine	unknown	NA	NA	4.49689440993789	4	536	10	63	165	1183.76266056465	254.686005656756	480.974205147444	163.371806197553	0.488957580697107	NA
697853509	45	176	176	296	Traced	LHPV5b6_R	275702031	TRUE	right	LHPV5b6	LHPV5b6	LHON	PDL22	acetylcholine	unknown	NA	NA	4.59938524590164	4	296	0	41	133	951.563057670744	162.296877291001	385.532952653743	153.346021303454	0.597223174675448	NA
636798093	195	339	339	1685	Traced	LHPV5c1_a_R	354596766	TRUE	right	LHPV5c1_a	LHPV5c1_a	LHON	PDL05	acetylcholine	unknown	NA	NA	3.75720164609054	4	1351	292	97	232	1446.55189148387	270.99019087573	737.49036388606	100.755329687156	0.19502711342853	NA
391273276	179	290	290	1620	Traced	LHPV5c1_a_R	322245650	TRUE	right	LHPV5c1_a	LHPV5c1_a	LHON	PDL05	acetylcholine	unknown	NA	NA	3.8143153526971	4	1288	290	102	179	1403.76308630398	273.679991365936	605.098712261837	127.765901171419	0.143268215072632	L15 (Jeanne et al. Neuron 2018)
422640861	190	377	377	1595	Traced	LHPV5c1_a_R	376975500	TRUE	right	LHPV5c1_a	LHPV5c1_a	LHON	PDL05	acetylcholine	unknown	NA	NA	3.5678496868476	4	1224	371	89	284	1508.61739440634	301.455743108568	779.645187251145	83.1667692109425	0.19034487699621	NA
424025668	212	408	408	1700	Traced	LHPV5c1_a_R	439052931	TRUE	right	LHPV5c1_a	LHPV5c1_a	LHON	PDL05	acetylcholine	unknown	NA	NA	3.50314465408805	4	1165	535	97	305	1662.34954186351	316.50657110398	886.903679036377	83.7327512267235	0.130069919840732	L8 (Jeanne et al. Neuron 2018)
361269751	144	209	209	1441	Traced	LHPV5c1_b_R	358145420	TRUE	right	LHPV5c1_b	LHPV5c1_b	LHON	PDL05	acetylcholine	unknown	NA	NA	3.65901981230448	4	1342	99	82	123	1360.30881486517	295.115436329216	624.997577397982	103.494987445046	0.246422068648083	PV5c2 (Frechter et al. eLife 2019) (Dolan et al. eLife 2019)
573328182	146	243	243	1399	Traced	LHPV5c1_b_R	338858981	TRUE	right	LHPV5c1_b	LHPV5c1_b	LHON	PDL05	acetylcholine	unknown	NA	NA	3.76796714579055	4	1004	337	65	167	1361.86923698777	225.262713059987	634.86821077556	123.323651626362	0.141234492685514	NA
360254994	163	197	197	1602	Traced	LHPV5c1_b_R	393982342	TRUE	right	LHPV5c1_b	LHPV5c1_b	LHON	PDL05	acetylcholine	unknown	NA	NA	3.86987704918033	4	1556	45	85	103	1416.32977834208	396.165487745503	577.1362624769	97.1213466099793	0.292708369972466	PV5c2 (Frechter et al. eLife 2019) (Dolan et al. eLife 2019); L14 (Jeanne et al. Neuron 2018)
423343583	120	136	136	1097	Traced	LHPV5c1_c_R	263527734	TRUE	right	LHPV5c1_c	LHPV5c1_c	LHON	PDL05	acetylcholine	unknown	NA	NA	3.6407867494824	4	872	214	48	84	1135.32146391304	307.811835174471	392.270608334942	79.6509486482089	0.124899339224602	NA
422307542	119	187	187	978	Traced	LHPV5c1_d_R	297421720	TRUE	right	LHPV5c1_d	LHPV5c1_d	LHON	PDL22	acetylcholine	unknown	NA	NA	3.37305699481865	4	662	285	44	136	1205.59775062343	230.92300955174	527.956049023764	104.832534619955	0.132108819765896	NA
699203489	185	335	335	1638	Traced	LHPV5c1_d_R	355949881	TRUE	right	LHPV5c1_d	LHPV5c1_d	LHON	PDL22	acetylcholine	unknown	NA	NA	3.62785862785863	4	1306	264	111	212	1339.96256287577	270.325930017046	603.66729876567	127.223062531373	0.171769445250041	L14 (Jeanne et al. Neuron 2018)
5813009429	109	190	190	954	Traced	LHPV5c1_d_R	256183346	TRUE	right	LHPV5c1_d	LHPV5c1_d	LHON	PDL22	acetylcholine	unknown	NA	NA	3.59445585215606	4	663	257	54	123	1236.80115163174	273.746517591036	584.92059569075	88.481080388261	0.111287734209752	NA
728836965	114	155	155	1080	Traced	LHPV5c1_d_R	246471608	TRUE	right	LHPV5c1_d	LHPV5c1_d	LHON	PDL22	acetylcholine	unknown	NA	NA	3.46248715313464	4	977	103	56	93	1169.95394764434	385.703853719033	411.401263894588	39.3741067671146	0.221781275863571	PV5c2 (Frechter et al. eLife 2019) (Dolan et al. eLife 2019)
455751103	127	210	210	1019	Traced	LHPV5c2_R	297728659	TRUE	right	LHPV5c2	LHPV5c2	LHON	PDL05	acetylcholine	unknown	NA	NA	3.58726899383984	4	886	133	79	127	1311.68141502116	379.644875508081	511.382471854295	47.8476830420294	0.182640446628127	NA
485728655	122	179	179	996	Traced	LHPV5c2_R	276155078	TRUE	right	LHPV5c2	LHPV5c2	LHON	PDL05	acetylcholine	unknown	NA	NA	3.88477366255144	4	917	79	61	111	1080.59256902489	281.521489259038	417.806060054129	87.1328908428614	0.268036384744132	NA
611620813	68	103	103	603	Traced	LHPV5c3_R	231520000	TRUE	right	LHPV5c3	LHPV5c3	LHON	PDL22	acetylcholine	unknown	NA	NA	4.71703853955375	4	574	0	35	60	876.033800882062	166.877990248275	330.03378277012	115.289682194601	0.509951306568248	L8 (Jeanne et al. Neuron 2018)
763034485	72	121	121	625	Traced	LHPV5c3_R	233393954	TRUE	right	LHPV5c3	LHPV5c3	LHON	PDL22	acetylcholine	unknown	NA	NA	4.12371134020619	4	622	3	26	88	889.001030166069	155.209058924514	371.339402278797	201.143777049326	0.6152578252134	NA
768132738	85	148	148	682	Traced	LHPV5c3_R	258970289	TRUE	right	LHPV5c3	LHPV5c3	LHON	PDL22	acetylcholine	unknown	NA	NA	4.18821096173733	4	672	10	51	94	1025.85973737581	207.768713090712	409.960169168075	114.10545321841	0.433984169329456	NA
732354059	99	149	149	838	Traced	LHPV5c4_R	269384812	TRUE	right	LHPV5c4	LHPV5c4	LHON	PDL05	acetylcholine	unknown	NA	NA	3.86528497409326	4	802	28	45	100	1075.6851881413	244.70204069086	417.090408439992	107.280096564881	0.40702345692405	PV5c2 (Dolan et al. eLife 2019)
5813010200	165	291	291	1508	Traced	LHPV5d1_a_R	362117613	TRUE	right	LHPV5d1_a	LHPV5d1_a	LHON	PDL19	acetylcholine	unknown	NA	NA	3.92680412371134	4	1231	141	137	130	1089.40103472531	270.144359387564	389.235705329179	187.945890491917	0.131357151540449	NA
5813012375	162	461	461	1568	Traced	LHPV5d1_a_R	447068046	TRUE	right	LHPV5d1_a	LHPV5d1_a	LHON	PDL19	acetylcholine	unknown	NA	NA	3.70347648261759	4	1261	69	189	241	1232.12194110196	215.650193682884	535.215946862257	214.359825777975	0.258553424005831	PV5b1 (Dolan et al. eLife 2019)
329220439	152	368	368	1480	Traced	LHPV5d1_a_R	394349355	TRUE	right	LHPV5d1_a	LHPV5d1_a	LHON	PDL19	acetylcholine	unknown	NA	NA	3.78504672897196	4	939	316	123	208	1070.53150199501	161.871517011777	456.049873763007	190.227145916928	0.0980548041808394	NA
602999843	158	303	303	1437	Traced	LHPV5d1_a_R	384554815	TRUE	right	LHPV5d1_a	LHPV5d1_a	LHON	PDL19	acetylcholine	unknown	NA	NA	3.89722507708119	4	1035	180	132	144	1024.18739010952	214.252935644847	373.197015293156	192.258715937813	0.111694469791348	NA
573333575	127	309	309	1186	Traced	LHPV5d1_b_R	349692754	TRUE	right	LHPV5d1_b	LHPV5d1_b	LHON	PDL19	acetylcholine	unknown	NA	NA	3.91407867494824	4	1072	7	165	129	1167.78624498305	290.723520366428	422.778260822498	148.543717233	0.279983639096166	NA
696082279	127	231	231	1065	Traced	LHPV5d1_b_R	270366440	TRUE	right	LHPV5d1_b	LHPV5d1_b	LHON	PDL19	acetylcholine	unknown	NA	NA	3.61776859504132	4	749	226	92	112	1085.94206479132	275.292133729009	311.181407187291	144.614879595816	0.0701220220249573	NA
633684017	184	323	323	1575	Traced	LHPV5d2_R	359235327	TRUE	right	LHPV5d2	LHPV5d2	LHON	PDL19	acetylcholine	unknown	NA	NA	3.78719008264463	4	1066	346	136	163	1215.02745706833	319.177949641822	454.762480708837	158.237493595185	0.0621302445832682	NA
454706029	112	217	217	823	Traced	LHPV5d3_R	319621806	TRUE	right	LHPV5d3	LHPV5d3	LHON	PDL19	acetylcholine	unknown	NA	NA	3.82719836400818	4	770	26	84	123	1097.5029746996	288.948935123451	446.488009002267	131.800530499338	0.327305947417458	PV5b1 (Frechter et al. eLife 2019)
299082033	1313	4192	4192	13609	Traced	LHPV5e1(PDL05)_L	1477368756	FALSE	right	LHPV5e1	LHPV5e1	LHON	NA	unknown	NA	NA	NA	5.8515057113188	5	2555	10230	76	4092	6183.86054388057	185.47876320698	5089.54320451674	89.0155770632992	0.0573888111869986	NA
328611004	1561	10267	10267	15646	Traced	LHPV5e1_R	2613168605	TRUE	right	LHPV5e1	LHPV5e1	LHON	PDL05	acetylcholine	unknown	NA	NA	4.75259875259875	5	11798	3735	3553	6523	13002.0106276246	4449.73339714662	6709.10661497848	46.7543231914014	0.12426734442934	NA
294787849	503	1157	1157	3732	Traced	LHPV5e2_R	1154887326	TRUE	right	LHPV5e2	LHPV5e2	LHON	PDL05	acetylcholine	unknown	NA	NA	4.13739669421488	4	1316	2390	134	1020	3848.18560703336	452.225237183758	2316.86773936419	32.5060040107706	0.0512948779530166	NA
642504699	1632	2296	2296	15726	Traced	LHPV5e3(PDL05)_L	1737612368	FALSE	right	LHPV5e3	LHPV5e3	LHON	NA	unknown	NA	NA	NA	6.20807453416149	6	6985	8722	256	2032	5395.57698435043	843.116125333522	3802.32640170655	8.48670213907177	0.0780811438161767	NA
579575594	2161	6458	6458	20331	Traced	LHPV5e3_R	3037133194	TRUE	right	LHPV5e3	LHPV5e3	LHON	PDL05	acetylcholine	unknown	NA	NA	5.20337197049526	6	11426	8525	838	5591	11824.6237785352	2005.48740194776	7885.87017094145	43.298692979618	0.144343806757701	NA
356823065	243	226	226	1994	Traced	LHPV5f1_R	392052667	TRUE	right	LHPV5f1	LHPV5f1	LHON	PDL19	acetylcholine	unknown	NA	NA	3.73511293634497	4	1356	622	73	145	1428.03895492413	362.318442722231	643.706764873094	126.396811417183	0.0707575263207475	NA
5901208687	96	220	220	818	Traced	LHPV5g2_R	228760752	TRUE	right	LHPV5g2	LHPV5g2	LHON	PDL19	acetylcholine	unknown	NA	NA	5.26871794871795	5	748	26	89	118	954.29174896201	241.298274800791	363.025094489844	135.283390536168	0.304533355014598	NA
5813129400	48	80	80	371	Traced	LHPV5g2_R	144964893	TRUE	right	LHPV5g2	LHPV5g2	LHON	PDL19	acetylcholine	unknown	NA	NA	5.22974358974359	5	357	3	19	50	535.89387684267	78.9533944927886	156.809353417384	140.170883744978	0.541482725897029	NA
486501502	32	62	62	240	Traced	LHPV5g2_R	85090133	TRUE	right	LHPV5g2	LHPV5g2	LHON	PDL19	acetylcholine	unknown	NA	NA	3.60909090909091	5	196	9	24	32	427.085971422527	84.3805784701544	76.5425432238486	148.736506499346	0.282314185719987	NA
608240515	113	209	209	1079	Traced	LHPV5g2_R	280808590	TRUE	right	LHPV5g2	LHPV5g2	LHON	PDL19	acetylcholine	unknown	NA	NA	4.91224489795918	5	1015	26	77	131	1016.6074449853	225.648940214232	392.063829016432	124.945481105899	0.379733188598936	NA
295805243	69	196	196	454	Traced	LHPV5h1_R	196281165	TRUE	right	LHPV5h1	LHPV5h1	LHON	PDL23	unknown	unknown	NA	NA	3.61656441717791	4	393	13	60	116	984.984975894359	179.235829256417	393.485266929705	177.492372463896	0.385238242291265	NA
911012735	117	188	188	983	Traced	LHPV5h1_R	293920819	TRUE	right	LHPV5h1	LHPV5h1	LHON	PDL23	unknown	unknown	NA	NA	4	4	926	43	60	126	1157.17328613716	300.437526484003	514.263492259996	133.980478232964	0.368493112911028	NA
5813094592	108	120	120	854	Traced	LHPV5h1_R	236277258	TRUE	right	LHPV5h1	LHPV5h1	LHON	PDL23	unknown	unknown	NA	NA	3.83861082737487	4	799	0	53	59	868.127550871485	281.853301176676	276.363349032561	124.103681400967	0.415401572987765	NA
573056433	100	199	199	755	Traced	LHPV5h1_R	242152626	TRUE	right	LHPV5h1	LHPV5h1	LHON	PDL23	unknown	unknown	NA	NA	3.59406952965235	4	682	0	63	130	1022.14261404572	247.59298649106	410.630572221206	135.497632087354	0.532392176125171	NA
480931947	280	342	342	2052	Traced	LHPV5h1_R	445839650	TRUE	right	LHPV5h1	LHPV5h1	LHON	PDL23	unknown	unknown	NA	NA	3.4	4	1532	469	84	255	1616.44536661834	410.433888871692	747.316143206611	109.623962458874	0.173734945945416	NA
5813010180	174	272	272	1441	Traced	LHPV5h1_R	366053458	TRUE	right	LHPV5h1	LHPV5h1	LHON	PDL23	unknown	unknown	NA	NA	3.59147609147609	4	1297	130	75	191	1267.76850854314	302.732088686846	598.761241757325	104.486828791443	0.310568418107574	NA
296153261	29	137	137	199	Traced	LHPV5h1_R	137378230	TRUE	right	LHPV5h1	LHPV5h1	LHON	PDL23	unknown	unknown	NA	NA	3.51177072671443	4	164	31	40	91	741.215148151932	114.674670722765	300.104146036406	136.894993174462	0.225506283124465	NA
390599254	181	268	268	1349	Traced	LHPV5h2_R	452837645	TRUE	right	LHPV5h2	LHPV5h2	LHON	PDL23	unknown	unknown	NA	NA	3.70781893004115	4	1247	80	61	202	1606.80729617761	380.456670793258	721.360518687024	118.06752633643	0.4184667898366	NA
511267279	193	361	361	1364	Traced	LHPV5h2_R	330733108	FALSE	right	LHPV5h2	LHPV5h2	LHON	PDL23	unknown	unknown	NA	NA	3.71473029045643	4	1012	316	69	284	1678.52383883331	355.73253821411	844.143741974145	114.105594690813	0.222592057671782	NA
5813010159	176	308	308	1274	Traced	LHPV5h2_R	358089615	TRUE	right	LHPV5h2	LHPV5h2	LHON	PDL23	unknown	unknown	NA	NA	3.39587628865979	4	748	526	59	238	1506.86533137804	309.404061543794	694.380668721417	118.20503112996	0.100636809868411	NA
5813047174	152	346	346	1063	Traced	LHPV5h2_R	381582380	TRUE	right	LHPV5h2	LHPV5h2	LHON	PDL23	unknown	unknown	NA	NA	3.45520082389289	4	699	348	58	277	1602.45272089506	263.022135163971	831.84412031962	114.614026692986	0.171813531288716	NA
572647105	166	224	224	1206	Traced	LHPV5h2_R	345179159	TRUE	right	LHPV5h2	LHPV5h2	LHON	PDL23	unknown	unknown	NA	NA	3.50051813471503	4	734	454	53	170	1342.06010248527	274.761816392222	618.58975519286	108.795843552868	0.0911966628464802	NA
605063393	144	163	163	1118	Traced	LHPV5h4_R	317475195	TRUE	right	LHPV5h4	LHPV5h4	LHON	PDL23	unknown	unknown	NA	NA	3.68486096807415	4	555	504	22	134	1173.30892786613	155.216088134665	611.893131804505	149.721871545367	0.0952539556087171	NA
5813083717	104	130	130	756	Traced	LHPV5h4_R	286047600	TRUE	right	LHPV5h4	LHPV5h4	LHON	PDL23	unknown	unknown	NA	NA	3.45957011258956	4	618	138	48	73	1223.16075569218	338.180886137356	447.862949443428	125.095132771537	0.123208147645535	NA
573708714	112	114	114	939	Traced	LHPV5h4_R	283438014	TRUE	right	LHPV5h4	LHPV5h4	LHON	PDL23	unknown	unknown	NA	NA	4.33570701932859	4	705	159	51	50	1119.27517506965	251.1422710057	397.741039507585	183.367848339521	0.0672068568566342	NA
451646125	140	201	201	908	Traced	LHPV5h5_R	367834298	TRUE	right	LHPV5h5	LHPV5h5	LHON	PDL08	glutamate	unknown	NA	NA	3.34365325077399	3	563	312	35	160	1293.56307709648	277.608146250948	652.602733029681	128.121673396908	0.14265241987684	NA
485387561	135	116	116	1141	Traced	LHPV5h6_R	348703901	TRUE	right	LHPV5h6	LHPV5h6	LHON	PDL08	glutamate	unknown	NA	NA	3.37962962962963	3	878	160	39	68	1169.41848844746	256.215126746476	481.683089454724	214.375373567173	0.15535540321102	NA
5813077562	652	1725	1725	4490	Traced	LHPV5i1_R	2344631573	TRUE	right	LHPV5i1	LHPV5i1	LHON	PDL05	acetylcholine	unknown	NA	NA	4.19648397104447	4	1663	2815	203	1503	5900.81261539155	1074.20440281247	3538.1169788303	79.3542854761641	0.0576804561598137	NA
729228602	201	295	295	1334	Traced	LHPV5j1_R	356272860	TRUE	right	LHPV5j1	LHPV5j1	LHON	PDL23	unknown	unknown	NA	NA	3.31237113402062	3	997	335	74	220	1482.58449965864	440.205983477081	651.69488935603	45.1672136370239	0.164813890637115	NA
5901213816	190	139	139	1230	Traced	LHPV5j1_R	333842286	TRUE	right	LHPV5j1	LHPV5j1	LHON	PDL23	unknown	unknown	NA	NA	3.33604887983707	3	1156	17	62	69	1187.89035016442	419.68657585438	263.604283654083	95.8381026304207	0.323238420240545	NA
5812980282	136	313	313	1003	Traced	LHPV5j2_R	300969890	TRUE	right	LHPV5j2	LHPV5j2	LHON	PDL23	unknown	unknown	NA	NA	3.96417604912999	4	744	259	72	237	1276.25051957955	289.706703755294	581.57215219815	97.8390700788006	0.180586481880636	NA
759582005	173	276	276	1302	Traced	LHPV5j3_R	336888395	TRUE	right	LHPV5j3	LHPV5j3	LHON	PDL23	unknown	unknown	NA	NA	3.4349173553719	3	1241	49	78	191	1273.72082151716	305.255762668806	502.048221246386	128.032906448576	0.417429852925318	NA
880323994	132	132	132	1136	Traced	LHPV5j3_R	339577381	TRUE	right	LHPV5j3	LHPV5j3	LHON	PDL23	unknown	unknown	NA	NA	3.3360739979445	3	671	412	39	76	1115.6721084463	156.475421473053	495.939030997844	146.675670710201	0.0439364430901261	NA
541663112	186	363	363	1395	Traced	LHPV5j5_R	320386319	TRUE	right	LHPV5j5	LHPV5j5	LHON	PDL23	unknown	unknown	NA	NA	3.5531475748194	4	903	492	62	296	1567.98104860819	303.223991608691	778.361756680758	91.5213273126445	0.152864082437068	NA
5813047130	204	409	409	1597	Traced	LHPV5j5_R	369596910	TRUE	right	LHPV5j5	LHPV5j5	LHON	PDL23	unknown	unknown	NA	NA	3.52282157676349	4	1098	499	65	341	1756.44067512995	428.118724111157	877.669672417475	90.2826063235068	0.189967061123185	NA
357224041	1249	3499	3499	10470	Traced	LHPV5l1_R	2171816408	TRUE	right	LHPV5l1	LHPV5l1	LHON	PDL05	acetylcholine	unknown	NA	NA	5.33712512926577	5	8932	1377	1315	2155	6874.7960236542	2140.45944196612	3727.58735836309	101.815030783453	0.191302811595864	NA
5812982844	93	149	149	759	Traced	LHPV5m1_R	183256196	TRUE	right	LHPV5m1	LHPV5m1	LHN	PDL23	unknown	unknown	NA	NA	4.21993833504625	4	754	5	63	86	875.111015818447	272.386722050395	303.674416886327	42.5735695171602	0.404659292683981	NA
1005119041	100	341	341	774	Traced	LHPV5m1_R	240705191	TRUE	right	LHPV5m1	LHPV5m1	LHN	PDL23	unknown	unknown	NA	NA	4.16820512820513	4	767	7	126	212	1255.33662171389	325.833752435883	625.26245382943	41.210843739222	0.422526318623947	NA
973047668	48	102	102	315	Traced	LHPV5m1_R	125495529	TRUE	right	LHPV5m1	LHPV5m1	LHLN	PDL23	unknown	unknown	NA	NA	3.84020618556701	4	290	15	50	52	583.865019179608	231.769160581256	177.917306309681	42.2748294552815	0.22492681812218	NA
5813012322	199	239	239	1314	Traced	LHPV6a1_R	447354408	TRUE	right	LHPV6a1	LHPV6a1	LHON	PDL10	unknown	unknown	NA	NA	3.84118852459016	4	1201	97	123	99	1454.74806006304	520.060314302315	401.128556548253	122.590735390731	0.137326941808586	NA
480945354	195	267	267	1645	Traced	LHPV6a1_R	336246554	TRUE	right	LHPV6a1	LHPV6a1	LHON	PDL10	unknown	unknown	NA	NA	4.32194616977226	4	1512	119	148	99	1231.32571677828	403.068007882606	354.687813275237	131.75638588613	0.112027567843151	NA
481627444	202	233	233	1448	Traced	LHPV6a1_R	409217916	TRUE	right	LHPV6a1	LHPV6a1	LHON	PDL10	unknown	unknown	NA	NA	4.25152749490835	4	1307	95	137	81	1341.63019388608	496.277999293392	350.634329719318	121.390842055973	0.102338214678025	NA
480590337	182	257	257	1488	Traced	LHPV6a1_R	378912705	TRUE	right	LHPV6a1	LHPV6a1	LHON	PDL10	unknown	unknown	NA	NA	3.90599173553719	4	1350	138	118	119	1274.24124589431	354.083645547722	457.042147538857	117.652554872836	0.148199474675379	NA
511966731	179	194	194	1496	Traced	LHPV6a1_R	351470043	TRUE	right	LHPV6a1	LHPV6a1	LHON	PDL10	unknown	unknown	NA	NA	3.62951496388029	4	1050	428	76	110	1221.96407259659	296.891314657572	429.441207577087	119.574103309163	0.0549191603548284	NA
5813039907	158	204	204	1389	Traced	LHPV6a1_R	412775777	TRUE	right	LHPV6a1	LHPV6a1	LHON	PDL10	unknown	unknown	NA	NA	3.47471620227038	4	1076	313	76	113	1245.26515974769	359.215591247337	444.710222708835	70.6692903583086	0.089594440788787	NA
480594756	245	277	277	1913	Traced	LHPV6a1_R	434866107	TRUE	right	LHPV6a1	LHPV6a1	LHON	PDL10	unknown	unknown	NA	NA	3.92607802874743	4	1775	124	140	128	1472.28224947027	537.860033151316	522.34906670156	82.9070216348433	0.166786079896382	NA
758154573	150	179	179	1281	Traced	LHPV6a1_R	394393624	TRUE	right	LHPV6a1	LHPV6a1	LHON	PDL10	unknown	unknown	NA	NA	3.68237704918033	4	958	302	69	99	1180.58959319862	347.804361903009	403.242225486089	72.1287082729512	0.07767344247371	NA
574468840	134	176	176	1178	Traced	LHPV6a1_R	278230649	TRUE	right	LHPV6a1	LHPV6a1	LHON	PDL10	unknown	unknown	NA	NA	3.55076923076923	4	802	338	79	87	1089.95176860711	284.925698598085	382.777977932573	109.042894561944	0.0323854155200131	NA
511626286	121	174	174	1023	Traced	LHPV6a1_R	274297446	TRUE	right	LHPV6a1	LHPV6a1	LHON	PDL10	unknown	unknown	NA	NA	3.87027579162411	4	825	198	82	84	1047.38485894983	288.147780555573	384.041956447675	63.0393231134296	0.0700207272943121	NA
511625768	213	222	222	1752	Traced	LHPV6a1_R	438424113	TRUE	right	LHPV6a1	LHPV6a1	LHON	PDL10	unknown	unknown	NA	NA	3.63963039014374	4	1517	201	98	114	1508.28834491872	473.004561327613	464.999764197027	94.9629589390096	0.138300448479981	NA
511626068	214	290	290	1745	Traced	LHPV6a1_R	361918610	TRUE	right	LHPV6a1	LHPV6a1	LHON	PDL10	unknown	unknown	NA	NA	3.64748201438849	4	1198	539	94	182	1465.81252130432	350.799823278581	586.601171925182	98.4066803144948	0.0750297148556734	NA
543684107	200	260	260	1739	Traced	LHPV6a1_R	393621125	TRUE	right	LHPV6a1	LHPV6a1	LHON	PDL10	unknown	unknown	NA	NA	3.95724713242961	4	1342	378	129	105	1438.16463452631	471.175097860321	384.296190848569	99.5295256088231	0.0362848208248299	NA
480599437	231	252	252	1873	Traced	LHPV6a1_R	409123322	TRUE	right	LHPV6a1	LHPV6a1	LHON	PDL10	unknown	unknown	NA	NA	4.0594262295082	4	1761	73	149	91	1322.63022081404	467.793103420377	413.224156920588	99.5416253707404	0.144422786579224	NA
480923210	545	1020	1020	3993	Traced	LHPV6a10_R	806393331	TRUE	right	LHPV6a10	LHPV6a10	LHON	PDL10	unknown	unknown	NA	NA	3.581589958159	4	2637	1313	328	680	3333.04517238415	881.622849484037	1539.23161919242	90.5840150834665	0.0771403568216731	PV6a3 (Dolan et al. eLife 2019)
327506825	299	483	483	2469	Traced	LHPV6a11_a_R	521512775	TRUE	right	LHPV6a11_a	LHPV6a11_a	LHON	PDL10	unknown	unknown	NA	NA	3.83018867924528	4	1771	672	155	321	1885.23025280939	394.529877223977	944.525573495907	88.7847436586045	0.103300031692395	NA
326812225	169	304	304	1248	Traced	LHPV6a11_b_R	398974256	TRUE	right	LHPV6a11_b	LHPV6a11_b	LHON	PDL10	unknown	unknown	NA	NA	3.63267429760666	4	1136	96	83	216	1390.18656171876	311.266696399339	641.509880174036	77.9032041040294	0.344331695742056	NA
449910491	299	542	542	2129	Traced	LHPV6a11_b_R	539267819	TRUE	right	LHPV6a11_b	LHPV6a11_b	LHON	PDL10	unknown	unknown	NA	NA	3.81320949432405	4	1549	500	172	341	1966.85086341935	365.591045326113	1048.43985391607	62.9589261869836	0.121446149386907	NA
449555633	65	180	180	493	Traced	LHPV6a2_a_R	223977497	TRUE	right	LHPV6a2_a	LHPV6a2_a	LHON	PDL10	unknown	unknown	NA	NA	3.5952380952381	4	469	21	64	109	886.755512888539	187.853680545284	317.241075036204	89.9124365754519	0.334868332704462	NA
449564064	89	141	141	627	Traced	LHPV6a2_a_R	294441050	TRUE	right	LHPV6a2_a	LHPV6a2_a	LHON	PDL10	unknown	unknown	NA	NA	3.42520491803279	4	613	14	38	90	886.077148337355	188.04329434863	273.326018326633	84.0845173984422	0.458993235623484	NA
294445931	108	240	240	813	Traced	LHPV6a2_b_R	323065345	TRUE	right	LHPV6a2_b	LHPV6a2_b	LHON	PDL10	unknown	unknown	NA	NA	3.34958506224066	3	800	13	60	161	1124.36930664372	223.413247456445	435.524362400308	90.8082319929092	0.508227566721944	NA
295779879	119	190	190	959	Traced	LHPV6a2_b_R	376627357	TRUE	right	LHPV6a2_b	LHPV6a2_b	LHON	PDL10	unknown	unknown	NA	NA	3.40165631469979	3	912	14	76	107	1022.10941038425	228.264369882093	304.555654358063	93.5496853949839	0.373304816961901	NA
604039904	113	223	223	905	Traced	LHPV6a2_b_R	297448985	TRUE	right	LHPV6a2_b	LHPV6a2_b	LHON	PDL10	unknown	unknown	NA	NA	3.48699271592092	3	885	7	63	152	1102.99902447033	250.864169000835	456.703234508797	90.0080355774851	0.522218807700687	NA
325455473	223	227	227	1641	Traced	LHPV6a3_a_R	409746109	TRUE	right	LHPV6a3_a	LHPV6a3_a	LHON	PDL10	unknown	unknown	NA	NA	3.40327533265097	3	1485	53	102	114	1284.03085893173	347.304965197585	415.913856773068	109.980724699535	0.262105053257442	NA
5813010385	182	202	202	1496	Traced	LHPV6a3_b_R	415944977	TRUE	right	LHPV6a3_b	LHPV6a3_b	LHON	PDL10	unknown	unknown	NA	NA	3.80598555211558	4	1462	24	87	107	1315.08710176308	363.019234013551	443.512308689945	80.8284566880877	0.33889611281656	NA
574372960	126	139	139	1008	Traced	LHPV6a3_b_R	394603090	TRUE	right	LHPV6a3_b	LHPV6a3_b	LHON	PDL10	unknown	unknown	NA	NA	3.62692702980473	4	991	8	50	80	1030.00022545338	205.650405507313	310.083412648676	85.8570202725518	0.436070827256733	Local6 (Jeanne et al. Neuron 2018)
388863775	203	208	208	1738	Traced	LHPV6a3_b_R	402162720	TRUE	right	LHPV6a3_b	LHPV6a3_b	LHON	PDL10	unknown	unknown	NA	NA	4	4	1344	350	92	108	1287.34464156968	324.838804533828	444.209296277262	117.744112362477	0.0731611349427915	NA
419557747	190	239	239	1604	Traced	LHPV6a3_b_R	451801376	TRUE	right	LHPV6a3_b	LHPV6a3_b	LHON	PDL10	unknown	unknown	NA	NA	3.78490175801448	4	1422	157	112	115	1468.85198994358	445.561136325442	479.419479940369	81.9423259747752	0.141559957445488	NA
294760680	104	285	285	856	Traced	LHPV6a4_a_R	417016158	TRUE	right	LHPV6a4_a	LHPV6a4_a	LHON	PDL10	unknown	unknown	NA	NA	3.42680412371134	3	753	103	69	209	1285.54228941904	197.081920393024	670.247982750227	61.2482274896212	0.311453569681723	NA
325787243	128	184	184	973	Traced	LHPV6a4_b_R	356534476	TRUE	right	LHPV6a4_b	LHPV6a4_b	LHON	PDL10	unknown	unknown	NA	NA	3.28820512820513	3	836	137	51	121	1129.50673760875	223.197623403696	401.832530439622	75.816156735583	0.229004638378002	NA
325797575	124	225	225	994	Traced	LHPV6a4_b_R	369318831	TRUE	right	LHPV6a4_b	LHPV6a4_b	LHON	PDL10	unknown	unknown	NA	NA	3.27029804727646	3	844	146	60	157	1207.94967918355	216.138012723017	501.881560582803	72.2843218962217	0.242783533191474	NA
294756576	137	149	149	1115	Traced	LHPV6a4_b_R	340247648	TRUE	right	LHPV6a4_b	LHPV6a4_b	LHON	PDL10	unknown	unknown	NA	NA	3.47298674821611	3	1041	27	71	69	1037.90633899802	258.974006092114	310.626021877459	90.0596927446168	0.258981617654178	NA
5813087551	171	226	226	1276	Traced	LHPV6a4_c_R	447509966	TRUE	right	LHPV6a4_c	LHPV6a4_c	LHON	PDL10	unknown	unknown	NA	NA	3.22736625514403	3	967	242	63	156	1182.55512030994	166.888514151889	506.545515266985	85.359110127297	0.177021946126762	NA
5813055734	77	140	140	670	Traced	LHPV6a4_c_R	327420676	TRUE	right	LHPV6a4_c	LHPV6a4_c	LHON	PDL10	unknown	unknown	NA	NA	3.36929460580913	3	602	66	33	102	1023.75367470196	133.960312389667	410.521232065409	98.1763308192222	0.333813185433182	NA
360596183	136	273	273	1022	Traced	LHPV6a5_R	461644291	TRUE	right	LHPV6a5	LHPV6a5	LHON	PDL10	unknown	unknown	NA	NA	3.68795811518325	4	860	162	90	172	1304.84849700409	268.792881549673	571.003916855231	40.3672569173711	0.185642295193409	NA
449555517	144	241	241	1049	Traced	LHPV6a5_R	429579050	TRUE	right	LHPV6a5	LHPV6a5	LHON	PDL10	unknown	unknown	NA	NA	3.54393305439331	4	963	75	62	172	1298.49886446778	269.886615201626	481.778355568627	77.9638387813076	0.364852714477374	NA
294774719	68	162	162	541	Traced	LHPV6a6_a_R	247583662	TRUE	right	LHPV6a6_a	LHPV6a6_a	LHON	PDL10	unknown	unknown	NA	NA	3.48562628336756	3	489	41	56	99	951.065115385091	172.760096562974	380.831180618059	83.080121509589	0.276268967441231	NA
449564352	63	147	147	512	Traced	LHPV6a6_b_R	239702996	TRUE	right	LHPV6a6_b	LHPV6a6_b	LHON	PDL10	unknown	unknown	NA	NA	3.56693711967546	4	502	10	47	98	968.164027699541	207.878930707193	350.552602182552	64.2069844807148	0.441200058348001	NA
325802256	78	163	163	540	Traced	LHPV6a6_b_R	225190483	TRUE	right	LHPV6a6_b	LHPV6a6_b	LHON	PDL10	unknown	unknown	NA	NA	3.64241803278689	4	481	59	37	119	1024.38749163178	183.184178371058	440.392246248624	64.3127801909943	0.334775809689626	NA
5813061371	27	117	117	152	Traced	LHPV6a6_b_R	265014997	TRUE	right	LHPV6a6_b	LHPV6a6_b	LHON	PDL10	unknown	unknown	NA	NA	3.42798353909465	4	133	19	19	95	839.529211182808	98.2080353499808	344.721243760792	73.5500367415302	0.401976791408113	NA
5813010495	97	225	225	772	Traced	LHPV6a7_R	275800762	TRUE	right	LHPV6a7	LHPV6a7	LHON	PDL10	unknown	unknown	NA	NA	3.67311608961303	4	567	163	68	153	1213.31096950428	245.817974465483	548.575822782309	65.4516676264901	0.156254353029078	NA
5813011299	141	280	280	1052	Traced	LHPV6a7_R	347118760	TRUE	right	LHPV6a7	LHPV6a7	LHON	PDL10	unknown	unknown	NA	NA	3.579604578564	4	702	251	70	153	1374.90089500616	362.34905769703	366.827852626223	68.600577029793	0.119710115694379	NA
480590606	157	174	174	1143	Traced	LHPV6a7_R	355653474	TRUE	right	LHPV6a7	LHPV6a7	LHON	PDL10	unknown	unknown	NA	NA	3.65128205128205	4	730	413	54	114	1233.59362256532	342.879742258251	455.037935729065	48.7070198191848	0.0600509976804554	NA
326817565	147	384	384	1112	Traced	LHPV6a8_R	341427175	TRUE	right	LHPV6a8	LHPV6a8	LHON	PDL10	unknown	unknown	NA	NA	3.62551867219917	4	1012	71	120	260	1566.29689882858	375.861355205654	750.959422537886	73.1826837124169	0.337952316826329	NA
449568880	119	271	271	826	Traced	LHPV6a8_R	317056714	TRUE	right	LHPV6a8	LHPV6a8	LHON	PDL10	unknown	unknown	NA	NA	3.6797520661157	4	767	33	76	191	1301.79239307254	324.660478424351	560.102584880983	69.9593202671144	0.418644245439533	NA
325797488	94	249	249	654	Traced	LHPV6a8_R	286424704	TRUE	right	LHPV6a8	LHPV6a8	LHON	PDL10	unknown	unknown	NA	NA	3.73553719008264	4	612	42	70	175	1149.42692707327	262.766286119092	505.08481335489	69.9973852457692	0.369050722942298	NA
480595244	103	212	212	757	Traced	LHPV6a9_a_R	259177605	TRUE	right	LHPV6a9_a	LHPV6a9_a	LHON	PDL10	unknown	unknown	NA	NA	3.54479166666667	4	703	15	88	114	1047.55860515751	292.236620383335	372.97610316398	100.40601692742	0.333966862144732	NA
5813009800	82	330	330	668	Traced	LHPV6a9_a_R	260469288	TRUE	right	LHPV6a9_a	LHPV6a9_a	LHON	PDL10	unknown	unknown	NA	NA	3.77272727272727	4	648	16	77	248	1205.52641021981	209.237717529485	537.825536722459	94.550071584748	0.511712992158145	NA
294782488	120	264	264	1096	Traced	LHPV6a9_b_R	173583246	FALSE	right	LHPV6a9_b	LHPV6a9_b	LHON	PDL10	unknown	unknown	NA	NA	3.78690228690229	4	1051	42	75	182	1064.89525099153	280.179212647661	392.608955978875	80.8277636806298	0.416073990805528	NA
418875451	114	343	343	930	Traced	LHPV6a9_b_R	201490906	FALSE	right	LHPV6a9_b	LHPV6a9_b	LHON	PDL10	unknown	unknown	NA	NA	4.05759162303665	4	877	29	102	233	1290.88666837013	300.745072999752	560.378457721368	109.763901998746	0.421995594197914	NA
356818664	40	170	170	368	Traced	LHPV6a9_b_R	128286612	TRUE	right	LHPV6a9_b	LHPV6a9_b	LHON	PDL10	unknown	unknown	NA	NA	3.5297131147541	4	335	33	29	135	701.300072799202	126.067746800732	284.307875786598	60.6130884457794	0.438844748319022	NA
603095061	151	188	188	1132	Traced	LHPV6b1_R	408511393	TRUE	right	LHPV6b1	LHPV6b1	LHON	PDL10	unknown	unknown	NA	NA	4.21610601427115	4	994	63	103	73	941.066833707038	243.58533720148	316.541157047828	168.548063094271	0.138211145414751	NA
359279388	154	277	277	1112	Traced	LHPV6b1_R	376979387	TRUE	right	LHPV6b1	LHPV6b1	LHON	PDL10	unknown	unknown	NA	NA	4.06510681586979	4	976	35	143	119	1076.45891486603	324.820310541781	392.024339462196	130.057332310861	0.211628071228245	NA
295111672	103	184	184	862	Traced	LHPV6b1_R	339462202	TRUE	right	LHPV6b1	LHPV6b1	LHON	PDL10	unknown	unknown	NA	NA	3.67838676318511	4	843	0	56	115	1235.77589096329	308.012444271868	429.229481199172	118.405630500427	0.544267431524837	NA
5813134617	151	262	262	1203	Traced	LHPV6b1_R	333826814	TRUE	right	LHPV6b1	LHPV6b1	LHON	PDL10	unknown	unknown	NA	NA	3.7286012526096	4	1158	32	112	138	1278.4122655728	312.916735078201	523.872330144912	111.982352420051	0.30626098999816	NA
573009633	176	320	320	1219	Traced	LHPV6b1_R	372251632	TRUE	right	LHPV6b1	LHPV6b1	LHON	PDL10	unknown	unknown	NA	NA	3.88969823100937	4	1000	153	137	167	1331.01615525264	291.414518883065	596.929804686131	122.102365003777	0.142596380256917	NA
325472654	156	347	347	1020	Traced	LHPV6b1_R	371290417	TRUE	right	LHPV6b1	LHPV6b1	LHON	PDL10	unknown	unknown	NA	NA	4.13020833333333	4	881	58	165	173	1306.11219281459	326.871171521652	552.62087271539	113.205243595558	0.205753741895491	NA
5813009280	165	262	262	1227	Traced	LHPV6b1_R	453499678	TRUE	right	LHPV6b1	LHPV6b1	LHON	PDL10	unknown	unknown	NA	NA	3.80800821355236	4	1140	30	120	109	1188.05256258484	316.039143408901	473.278716683637	124.265102085808	0.248282474202157	NA
387870860	1224	1783	1783	11520	Traced	LHPV6c1_R	1640728350	TRUE	right	LHPV6c1	LHPV6c1	LHON	PDL10	unknown	unknown	NA	NA	3.61789473684211	4	7393	4105	694	1073	6302.38206677582	2385.1339739385	2533.00604809263	45.9224585036511	0.0376769235423879	NA
330246657	465	821	821	3785	Traced	LHPV6c2_R	844485818	TRUE	right	LHPV6c2	LHPV6c2	LHON	PDL10	unknown	unknown	NA	NA	4.19522326064382	4	2220	1553	153	659	3356.94710147996	606.581496014844	1956.63246326917	66.1912382396618	0.105708263012262	NA
357160116	176	225	225	1145	Traced	LHPV6d1_R	394670401	TRUE	right	LHPV6d1	LHPV6d1	LHON	PDL10	unknown	unknown	NA	NA	4.01651186790506	4	772	361	84	129	1387.51030723774	411.018451794685	482.215659028108	76.2588591964183	0.0521719255701335	NA
392308518	194	197	197	1288	Traced	LHPV6d1_R	403464101	TRUE	right	LHPV6d1	LHPV6d1	LHON	PDL10	unknown	unknown	NA	NA	3.99075025693731	4	1189	95	111	78	1368.25133951193	516.709733726978	377.301042497534	98.0834736631283	0.117066967910333	NA
513317334	11	100	100	66	Traced	LHPV6e1_R	226824997	TRUE	right	LHPV6e1	LHPV6e1	LHLN	PDL10	unknown	unknown	NA	NA	3.71967380224261	4	44	6	53	31	567.091846085357	157.213793575608	98.1581985162158	89.7175241727571	0.0599161020920613	NA
5813022453	124	355	355	972	Traced	LHPV6f1_R	317588471	TRUE	right	LHPV6f1	LHPV6f1	LHON	PDL14	acetylcholine	unknown	NA	NA	4.23716632443532	4	790	104	133	208	1281.55186016078	388.114180611189	538.767483141544	104.786738478511	0.204125612970466	NA
694471913	131	484	484	1007	Traced	LHPV6f1_R	342456579	TRUE	right	LHPV6f1	LHPV6f1	LHON	PDL14	acetylcholine	unknown	NA	NA	3.82117163412127	4	766	208	142	326	1542.3363534591	433.822253339883	681.539910599868	120.228625054206	0.173950738825334	NA
725498630	141	477	477	1069	Traced	LHPV6f1_R	318155887	TRUE	right	LHPV6f1	LHPV6f1	LHON	PDL14	acetylcholine	unknown	NA	NA	3.86694386694387	4	818	222	149	318	1475.52919579756	432.418743018605	698.09442111245	94.4310958391226	0.162490954331891	NA
787227302	134	308	308	969	Traced	LHPV6f1_R	268628134	TRUE	right	LHPV6f1	LHPV6f1	LHON	PDL14	acetylcholine	unknown	NA	NA	4.26113989637306	4	742	135	141	147	1151.61757499878	357.259549183376	431.205751003786	127.3871068872	0.105214170859477	NA
695167675	120	292	292	953	Traced	LHPV6f1_R	290722127	TRUE	right	LHPV6f1	LHPV6f1	LHON	PDL14	acetylcholine	unknown	NA	NA	4.34191555097837	4	887	15	142	125	1205.02487071225	399.281676261492	425.816971070257	135.251744475432	0.266698073664189	NA
695508439	124	283	283	921	Traced	LHPV6f1_R	302634672	TRUE	right	LHPV6f1	LHPV6f1	LHON	PDL14	acetylcholine	unknown	NA	NA	4.64669421487603	4	797	53	154	113	1209.33360762203	368.867560245598	485.7737991839	132.095615734185	0.145162969505425	NA
881696475	85	171	171	655	Traced	LHPV6f2_a_R	265227423	TRUE	right	LHPV6f2_a	LHPV6f2_a	LHON	PDL14	acetylcholine	unknown	NA	NA	3.89424083769633	4	603	46	48	118	1006.47390712404	409.000411963325	324.728190187829	66.1219232796321	0.34784748467882	NA
666916874	203	396	396	1489	Traced	LHPV6f2_b_R	481176017	TRUE	right	LHPV6f2_b	LHPV6f2_b	LHON	PDL14	acetylcholine	unknown	NA	NA	4.03405572755418	4	1410	49	180	196	1453.69427562581	574.26630110796	406.5851340481	125.826116048385	0.264824741125047	NA
849275471	130	150	150	1186	Traced	LHPV6f2_c_R	298060565	TRUE	right	LHPV6f2_c	LHPV6f2_c	LHON	PDL10	unknown	unknown	NA	NA	3.83874239350913	4	1139	0	41	103	1074.84001188954	419.754797997329	304.899765837071	86.7906922557632	0.604864939233925	NA
787205311	90	142	142	700	Traced	LHPV6f2_c_R	346841443	TRUE	right	LHPV6f2_c	LHPV6f2_c	LHN	PDL10	unknown	unknown	NA	NA	3.82161060142712	4	581	109	33	106	1017.87741407797	299.985507347523	381.719125536105	9.36538368484225	0.259503481522245	NA
509968249	139	294	294	1079	Traced	LHPV6f3_a_R	411387744	TRUE	right	LHPV6f3_a	LHPV6f3_a	LHON	PDL14	acetylcholine	unknown	NA	NA	3.78860103626943	4	825	140	122	158	1486.02346864807	314.13712067854	706.350481138738	101.955146617163	0.141385185508144	NA
571346887	118	363	363	835	Traced	LHPV6f3_c_R	548569455	TRUE	right	LHPV6f3_c	LHPV6f3_c	LHON	PDL14	acetylcholine	unknown	NA	NA	3.58187435633368	4	690	129	106	247	1568.90951780641	440.861395228835	733.183075491031	84.7721772515335	0.227306848261792	NA
696489026	101	274	274	810	Traced	LHPV6f3_e_R	386555593	TRUE	right	LHPV6f3_e	LHPV6f3_e	LHON	PDL14	acetylcholine	unknown	NA	NA	3.99895833333333	4	698	7	66	199	1387.72412461543	413.614645292077	570.227714225465	151.517395770215	0.551272102837013	NA
541007502	90	265	265	662	Traced	LHPV6f4_b_R	254184257	FALSE	right	LHPV6f4_b	LHPV6f4_b	LHON	PDL14	acetylcholine	unknown	NA	NA	4.50567595459236	4	656	0	70	192	1143.84370268591	444.727977517483	431.626861456953	80.3486560554042	0.580571291003426	NA
540662210	100	303	303	757	Traced	LHPV6f4_b_R	370337925	TRUE	right	LHPV6f4_b	LHPV6f4_b	LHON	PDL14	acetylcholine	unknown	NA	NA	4.35736677115987	4	517	215	64	217	1281.55940471009	243.952906890442	721.085079467062	92.7053540575176	0.162505351659355	NA
418205694	94	221	221	690	Traced	LHPV6f4_b_R	361042751	TRUE	right	LHPV6f4_b	LHPV6f4_b	LHON	PDL14	acetylcholine	unknown	NA	NA	3.98247422680412	4	586	104	42	178	1281.73278647694	432.35860686416	528.10021987832	72.7457600314319	0.324859275448963	NA
5812979935	17	237	237	136	Traced	LHPV6f4_b_R	294315034	TRUE	right	LHPV6f4_b	LHPV6f4_b	LHON	PDL14	acetylcholine	unknown	NA	NA	3.72069317023445	4	110	26	37	187	1015.18078367727	108.303297439353	649.245854993216	47.5686281334421	0.321381918374753	NA
356503889	102	300	300	749	Traced	LHPV6f4_b_R	379854303	TRUE	right	LHPV6f4_b	LHPV6f4_b	LHON	PDL14	acetylcholine	unknown	NA	NA	4.08247422680412	4	732	1	75	214	1352.03304537117	530.093856137193	494.797409473364	81.7762779453631	0.579474366058198	NA
540657374	239	490	490	1948	Traced	LHPV6f5_R	444469484	TRUE	right	LHPV6f5	LHPV6f5	LHON	PDL14	acetylcholine	unknown	NA	NA	3.95760082730093	4	1792	80	214	258	1898.08832857928	571.461025999861	856.763758552121	123.878490098512	0.264429709625968	NA
541373868	158	296	296	1226	Traced	LHPV6f5_R	334138841	TRUE	right	LHPV6f5	LHPV6f5	LHON	PDL14	acetylcholine	unknown	NA	NA	4.21472392638037	4	1014	146	178	106	1251.6836358207	409.357110737259	377.358716537952	113.760011093554	0.0585468786773101	NA
387215056	70	216	216	507	Traced	LHPV6f6_R	278490260	TRUE	right	LHPV6f6	LHPV6f6	LHON	PDL14	acetylcholine	unknown	NA	NA	3.62422997946612	4	472	12	61	148	1095.48553693949	228.52208633122	543.49445698094	119.99541326249	0.452652198791664	NA
417869138	125	276	276	995	Traced	LHPV6f6_R	353758129	TRUE	right	LHPV6f6	LHPV6f6	LHON	PDL14	acetylcholine	unknown	NA	NA	3.710499490316	4	826	54	100	161	1318.50514995307	195.41316381784	569.476196282321	135.504225091962	0.285928147178796	NA
5813067776	289	601	601	2052	Traced	LHPV6f7_R	598538586	TRUE	right	LHPV6f7	LHPV6f7	LHON	PDL14	acetylcholine	unknown	NA	NA	4.62785862785863	5	1680	324	214	372	1755.26463263173	598.279107653977	715.182172421443	86.0121541149122	0.170467107569828	NA
5813021912	226	418	418	1601	Traced	LHPV6f7_R	543030659	TRUE	right	LHPV6f7	LHPV6f7	LHON	PDL14	acetylcholine	unknown	NA	NA	4.83125	5	1477	72	207	199	1449.47279174561	584.498866229236	514.960662429483	69.8676089349604	0.214474927368186	NA
5813049920	1468	1487	1487	15746	Traced	LHPV6g1_R	1557477273	FALSE	right	LHPV6g1	LHPV6g1	LHON	PDL07	unknown	unknown	NA	NA	4.12719751809721	4	6643	8672	357	1104	5307.57940158035	828.419827158315	3067.74131507678	159.734573505796	0.0210355492831031	NA
696829800	209	583	583	1647	Traced	LHPV6h1_a_R	375643274	FALSE	right	LHPV6h1_a	LHPV6h1_a	LHON	PDL10	unknown	unknown	NA	NA	3.58324715615305	4	1009	626	155	426	1960.99287948445	444.156379578758	996.591609936525	78.8273037727224	0.0848418939618231	NA
387180498	171	500	500	1373	Traced	LHPV6h1_a_R	408593623	TRUE	right	LHPV6h1_a	LHPV6h1_a	LHON	PDL10	unknown	unknown	NA	NA	3.62029288702929	4	1130	239	119	378	1713.88198007888	376.989389215059	834.335668748515	82.9508544252861	0.255869867891425	NA
5813010690	186	693	693	1479	Traced	LHPV6h1_a_R	453326654	TRUE	right	LHPV6h1_a	LHPV6h1_a	LHON	PDL10	unknown	unknown	NA	NA	3.45454545454545	4	1063	382	143	540	2056.37898078113	400.646081111658	1123.49459786352	97.0320281387505	0.202889929749093	NA
418224293	232	618	618	2031	Traced	LHPV6h1_a_R	426218269	TRUE	right	LHPV6h1_a	LHPV6h1_a	LHON	PDL10	unknown	unknown	NA	NA	3.73541666666667	4	1257	774	264	346	1968.07606592547	589.535132504753	792.700598718633	75.3582316301696	0.023087180653304	NA
449910481	189	376	376	1506	Traced	LHPV6h1_b_R	375216115	TRUE	right	LHPV6h1_b	LHPV6h1_b	LHON	PDL10	unknown	unknown	NA	NA	3.69270298047276	4	1404	56	111	254	1523.63123918435	301.799003675144	709.707852249545	118.244391869894	0.404994550538938	NA
696830498	166	300	300	1372	Traced	LHPV6h1_b_R	399652204	TRUE	right	LHPV6h1_b	LHPV6h1_b	LHON	PDL10	unknown	unknown	NA	NA	3.65667011375388	4	1305	64	110	182	1412.69593864825	351.562498383402	567.83028875625	95.0001115351615	0.316836670648763	NA
5813010948	287	655	655	2595	Traced	LHPV6h2_R	468781405	TRUE	right	LHPV6h2	LHPV6h2	LHON	PDL10	unknown	unknown	NA	NA	4.12139917695473	4	1557	1034	226	426	1992.00059725198	422.889049203536	1026.89393100444	84.9859676457616	0.0419118739249036	NA
449568848	286	597	597	2495	Traced	LHPV6h2_R	539766282	TRUE	right	LHPV6h2	LHPV6h2	LHON	PDL10	unknown	unknown	NA	NA	4.02596053997923	4	1690	801	201	391	1947.22918855778	462.372633914175	966.253253666695	74.2750156176973	0.0751242764179071	NA
418552044	325	635	635	2871	Traced	LHPV6h2_R	559245556	TRUE	right	LHPV6h2	LHPV6h2	LHON	PDL10	unknown	unknown	NA	NA	4.34778121775026	4	1733	1072	247	379	1990.73401765655	440.871328805823	989.617484993551	94.6961033325648	0.0317152474430842	PV6a3 (Dolan et al. eLife 2019)
449901277	157	296	296	1262	Traced	LHPV6h3_R	291140462	TRUE	right	LHPV6h3	LHPV6h3	LHON	PDL10	unknown	unknown	NA	NA	3.67741935483871	4	1157	32	95	195	1350.70827997845	289.927677362393	585.428874472785	104.604333687673	0.414474119715348	NA
449910741	147	245	245	1142	Traced	LHPV6h3_R	348553078	TRUE	right	LHPV6h3	LHPV6h3	LHON	PDL10	unknown	unknown	NA	NA	4.30425752855659	4	1038	62	91	145	1188.16949739764	267.868830961444	506.168019891144	106.746625543307	0.289249992847898	NA
449910907	151	284	284	1278	Traced	LHPV6h3_R	354806122	TRUE	right	LHPV6h3	LHPV6h3	LHON	PDL10	unknown	unknown	NA	NA	4.04713114754098	4	1219	31	84	188	1330.63506257305	235.152840289179	607.910992100186	94.9617622164775	0.438991741282962	NA
635424442	223	201	201	1649	Traced	LHPV6i1_a_R	416356224	TRUE	right	LHPV6i1_a	LHPV6i1_a	LHON	PDL14	acetylcholine	unknown	NA	NA	3.42783505154639	4	1638	11	70	120	1355.3564979524	409.261186549085	471.324374063028	106.961123090266	0.460103192702167	NA
356499529	191	206	206	1448	Traced	LHPV6i1_a_R	346830578	TRUE	right	LHPV6i1_a	LHPV6i1_a	LHON	PDL14	acetylcholine	unknown	NA	NA	3.62487153134635	4	1430	11	66	127	1315.48700696391	285.996465022538	528.747639747111	146.997689524641	0.479477023861514	NA
386838513	231	366	366	1830	Traced	LHPV6i1_a_R	404217470	TRUE	right	LHPV6i1_a	LHPV6i1_a	LHON	PDL14	acetylcholine	unknown	NA	NA	3.85787321063395	4	1668	14	167	183	1586.87202995101	424.250693429024	607.903131881268	158.634694230938	0.346654373875987	NA
5813011395	187	242	242	1489	Traced	LHPV6i1_b_R	383876973	TRUE	right	LHPV6i1_b	LHPV6i1_b	LHON	PDL14	acetylcholine	unknown	NA	NA	3.86625514403292	4	1459	19	87	141	1471.85552852849	395.893429977987	594.650853927428	133.76697295189	0.413985557966209	NA
481946285	160	299	299	1009	Traced	LHPV6i1_b_R	240938945	FALSE	right	LHPV6i1_b	LHPV6i1_b	LHON	PDL14	acetylcholine	unknown	NA	NA	3.94769230769231	4	888	14	133	144	1176.7670170123	294.380950469061	483.902957999943	126.913280466879	0.311878776010282	NA
294760837	404	701	701	3398	Traced	LHPV6i2_a_R	784181532	TRUE	right	LHPV6i2_a	LHPV6i2_a	LHON	PDL14	acetylcholine	unknown	NA	NA	3.55520833333333	4	2402	973	254	438	2635.67486099872	576.697052992131	1246.61491966022	79.0254989301046	0.077294813183533	NA
5813010541	308	408	408	2454	Traced	LHPV6i2_b_R	400867226	TRUE	right	LHPV6i2_b	LHPV6i2_b	LHON	PDL14	acetylcholine	unknown	NA	NA	3.65025641025641	4	2285	166	192	203	1787.3290196088	487.930755319901	592.568024090443	98.0886921530904	0.189301207216756	NA
5813056278	84	132	132	740	Traced	LHPV6i3_R	263250964	TRUE	right	LHPV6i3	LHPV6i3	LHON	PDL14	acetylcholine	unknown	NA	NA	3.64081632653061	4	706	19	55	62	1102.40847621954	271.037802668119	351.041222999183	171.92305569082	0.28814468950784	NA
295107514	110	169	169	931	Traced	LHPV6i3_R	297338344	TRUE	right	LHPV6i3	LHPV6i3	LHN	PDL14	acetylcholine	unknown	NA	NA	3.85082304526749	4	900	5	85	64	1149.00990699465	329.176108309282	316.606518217369	165.912863592745	0.284158699344996	NA
326164634	137	206	206	1268	Traced	LHPV6i4_R	371275389	TRUE	right	LHPV6i4	LHPV6i4	LHON	PDL14	acetylcholine	unknown	NA	NA	3.91143151390319	4	940	208	85	112	1180.24434687394	281.856145752352	440.153981882972	136.777898264347	0.107184023165856	NA
636102761	657	920	920	5495	Traced	LHPV6j1_R	1734102620	TRUE	right	LHPV6j1	LHPV6j1	LHON	PDL10	unknown	unknown	NA	NA	4.02521008403361	4	4092	1353	354	542	3844.671548744	1471.05721999349	1523.64970196318	133.459092096861	0.0825755240041648	NA
5813064406	183	561	561	1970	Traced	LHPV6k1_R	420244504	TRUE	right	LHPV6k1	LHPV6k1	LHLN	PDL20	unknown	unknown	NA	NA	3.39076923076923	3	976	927	158	392	1780.31260937076	361.135362431006	804.706077585365	32.6374290201852	0.0345077508439824	NA
758239379	180	479	479	2030	Traced	LHPV6k1_R	407663498	TRUE	right	LHPV6k1	LHPV6k1	LHLN	PDL20	unknown	unknown	NA	NA	3.43788187372709	3	610	1357	68	406	1644.48335233804	207.340506518737	902.30854322153	31.2010866562139	0.0244116523840922	NA
[truncated: 768 more rows]
