# Supplementary material for: Information flow, cell types and stereotypy in a full olfactory connectome
Source: eLife. 2021 May 25;10:e66018. doi: 10.7554/eLife.66018 (PMC8298098; doi:10.7554/eLife.66018)
Supplement: Supplementary file 8. — This is either the location of the soma, or the tip of a severed cell body fibre tract, where possible. Exists as hemibrain_somas in our R package hemibrainr. [file elife-66018-supp8.csv]

bodyid	X	Y	Z
5813098080	778	21195	13089
5813087621	1764	20246	15200
5813058137	751	20686	13493
5813035183	535	23094	15896
5813014585	253	24722	13461
5812986485	768	21199	12194
1570922717	1614	21065	15356
1103327144	693	24464	12646
921969630	443	22649	12863
887433630	456	24236	12848
793298641	822	24242	13412
731244892	800	24232	14580
700210227	324	23893	15879
669852092	939	21528	12543
1014392280	1800	23498	17616
826762561	765	23765	13934
5813009998	210	23396	12244
1197449561	983	20002	13878
1166416004	716	19132	13260
1134703538	260	24153	16280
1130605683	910	21961	13844
1104686732	2033	21964	16515
1041602702	1194	20168	14253
1014051490	420	24080	12266
1011616276	100	24602	13698
980198319	390	24303	13570
979519562	451	23864	13968
975432645	800	22500	12390
949870573	80	23186	12000
948812702	1701	22686	16053
918123297	588	24590	13204
917086906	1439	22628	14861
883031393	686	19628	13551
882685590	1134	21601	13265
881991445	817	20655	12975
856407289	204	24846	13995
851684210	112	25387	15750
851317951	484	20812	13193
823999989	531	22960	12638
823988254	1068	22888	16225
823668338	1893	20720	15188
822289778	1974	21218	15003
820581199	371	22925	13105
794337453	1138	20814	14637
792610827	868	19226	13710
789580340	940	22550	15072
766781641	648	19993	13260
764006565	846	21046	12672
762948368	104	25532	14672
762263004	3442	22106	15508
761580655	1122	19318	14134
759586113	195	24177	15084
732600113	696	23010	16652
731919293	1158	24253	14347
731918732	354	23507	15588
731567967	664	23068	15411
728483069	2620	22705	16834
705381843	1504	21751	14091
703305408	937	23872	14383
700878180	1331	23073	14010
700550360	722	24060	13870
699894933	1212	23654	15136
698180393	1270	23040	15258
669869547	498	24486	14042
669171261	1258	22141	16112
667474054	1376	23166	14728
640221192	1305	22323	14541
638476365	380	24220	14472
638136190	192	20794	11398
607787481	1161	23283	16527
607104768	1291	23448	14208
607096048	1386	22282	15100
606444098	593	24572	14458
605791875	907	23082	13753
605417133	634	23494	15921
604031105	1112	22434	13313
579169910	1472	23562	14761
579169802	552	23782	15442
578474318	518	22729	16897
543365151	1346	23451	17262
515390688	959	23328	15577
512981720	1228	22539	15945
512645188	3370	22200	15424
511966686	1688	21899	15285
388513464	733	21584	13357
357823645	1718	22208	15708
357490931	1653	22557	15342
480931586	1866	21162	14332
5901195038	215	21167	11678
5813133775	326	23111	16372
5813061530	3702	15974	11658
5813012083	1877	22895	17251
5813010845	665	23514	14023
5813010525	1140	22325	14059
5812980863	1798	22306	16211
1321564092	2113	20441	15852
1290562990	553	21691	13708
1259528984	1129	21034	15048
1162711771	420	24028	13185
1131988003	1229	23742	16544
1100952886	1041	22760	14057
1042572999	933	23950	14905
1039867920	1486	21058	14710
1039267479	924	22940	15860
885132185	1066	22749	17106
856408517	205	24284	13088
762957069	970	22667	12842
732280395	1653	21323	14436
730882970	511	19209	12529
700878295	810	22078	14370
637121971	1016	21334	14462
605770509	1295	23626	15934
487144598	3283	22164	17350
360236724	532	23772	14454
328861282	2541	21176	15969
294437347	2367	22838	16352
1197454668	561	20836	12152
947590512	2999	21860	18124
1044075948	1572	20460	14696
982674745	784	21986	13036
890925383	562	24976	13500
5813060781	2500	21114	17359
1075041096	758	21707	12744
2160271244	2012	21924	14885
1106064205	0	24786	14112
982252540	486	23410	13490
5813075524	1808	21340	15621
1601957358	1113	20594	14245
1601957221	1215	22886	13210
1539542392	2550	21860	17235
1352983123	1998	21269	16370
1291245214	1635	21887	14554
1290904379	1180	21476	12864
1290563000	1212	21755	15435
1228489167	1243	21745	14511
1228489035	2250	21933	15857
1228484534	1122	21016	14139
1197450057	844	22657	13655
1197449936	600	20158	12612
1166415548	1131	23124	14289
1103996326	984	22088	15286
1013046019	1084	21611	14144
983362172	720	20570	12491
953004445	129	24107	12525
1228489539	1447	21933	14855
5813048876	14667	25291	14552
982674678	34401	24502	16552
890576126	34408	24576	16506
5901201909	1577	22936	10733
421300612	7638	22674	14756
360245971	675	20515	10831
5813010259	2278	22205	9566
639240544	749	22943	11549
577835762	407	21381	11312
546472393	1312	22238	10837
546127037	726	20786	11532
545786473	1547	22225	10446
453355233	527	22856	12170
453350926	1320	22686	11532
453026933	930	22386	11794
452677002	920	22890	11196
451663172	264	22872	11894
422669150	921	21554	11531
420956213	1652	20893	9836
420627152	872	22378	11270
392307898	643	20479	11209
391971977	1873	21468	9928
390953189	640	22395	12077
390590590	2630	24202	10662
360954739	1400	23519	10523
359227113	1134	23475	11010
329206628	996	23293	11424
298547259	2034	22586	9768
5901195761	3206	22681	9391
5901193642	1287	23427	11786
5813056887	1941	22520	13915
5813055907	518	22456	11564
5813055866	1836	22368	11208
5813055865	2010	23146	11789
5812983094	950	23162	12354
947820593	582	23726	11600
729621875	1874	22546	11892
701201945	1878	23424	10748
697476780	530	19076	10466
676479217	11304	17930	27950
577844302	965	21153	11166
547158593	2793	23778	11000
543692985	780	19818	10659
485745927	714	23732	11996
480978811	1946	23064	9985
453022644	1851	22099	10820
393340402	748	21236	11822
359926923	456	23367	11897
359240144	911	23937	11656
359219722	947	20882	10893
359210228	2530	20779	8748
297519736	1292	21890	13500
295461534	2587	21454	8983
329221260	1449	21769	10659
885168486	2536	22128	15138
482693819	1176	22982	11878
422388958	2338	22909	9422
392325540	1441	21116	10397
391289383	2943	22415	8443
329257947	2533	23065	12285
328887977	2290	23284	10258
328883690	1172	21348	10764
299268507	964	21774	10992
5901195077	2080	20986	9390
1439979802	2123	22175	10228
1070646938	940	24085	12753
919846263	3200	24061	14658
550638250	2953	23696	12694
549175510	1222	22004	12516
360263797	3448	22850	8922
359926731	2657	22649	9848
358197007	2610	22553	9141
330276998	2931	23517	13756
329254286	2756	23222	11735
295814630	1686	21616	10302
359556017	1772	22688	12959
917423207	2291	22814	13310
452340825	1883	21990	9906
5813055859	1416	22078	11566
5813046991	2861	23324	11175
1042957191	1464	22120	13072
980573057	2252	22748	10250
951234513	1596	23200	12480
796052404	2183	22594	10718
764683701	4314	24064	15598
516780722	3218	23788	13184
514712745	1764	22700	10360
512671271	3368	22914	15368
452971138	1215	20058	10170
390607680	651	21771	12120
359926787	2208	21481	9505
359926718	2883	23262	12816
359287673	735	22014	11442
330260421	3633	22168	8497
329566335	1417	21783	11284
329552035	504	21716	11604
328879764	3755	24156	14057
328519723	3414	22324	8922
328197044	1026	20652	10467
328188238	2432	21935	9173
297528741	2137	22802	11156
297519947	2732	22911	10328
296846314	2578	22948	10792
296842335	2426	23527	10713
5813047453	2916	23147	14149
5813009567	2816	22352	9616
5812982039	1372	22672	12646
1043143311	4900	25766	14876
1041343227	1616	23407	13078
1011611587	3848	23394	15630
947573616	4997	25678	15396
915481348	1120	21728	12058
392285973	2347	23598	11734
329215996	1583	23323	10273
327872592	2495	23028	11335
327861138	1328	22447	12000
734693858	3082	25167	12645
545441096	3078	25635	13240
453376390	3126	25168	13102
390629106	2499	24369	13357
641278400	3337	24396	11595
582696254	3401	24998	12007
576812462	2350	24688	12841
545440837	3106	25902	13588
544107243	3465	24903	12436
515437073	4604	25944	13911
514397189	2760	24758	10594
514073078	2666	25455	13295
485775679	4063	25395	12628
485430434	4372	27142	14200
485430376	2854	24762	13286
484040200	5708	28286	14054
483716037	2580	24361	12490
454706490	4534	26027	13564
454045389	2148	24288	12429
454041627	3766	25478	14094
453717632	3564	26232	13712
453350952	2572	25262	13741
452323015	3579	26125	13279
451960272	3934	26194	14074
421992069	4547	27020	13413
420615275	4482	26438	13263
420598392	3682	24888	14471
391643292	3682	25564	13806
391608263	3960	26198	13563
390593931	2644	25730	13803
360932188	3203	25248	11553
359905678	3470	25346	11274
359901157	3634	25370	11788
359219503	2455	24989	13330
328542009	2776	24944	11186
328524517	3878	26729	14075
5901193715	3834	25537	12280
5813115796	4301	27082	13937
5813085995	3485	26155	14162
5813055825	2792	25462	12820
5813026615	3740	25394	12879
5813010191	4250	26421	14378
5813010009	3932	26240	13022
5812980273	1938	24961	12479
981547981	4063	26741	13803
855414220	3590	25156	10624
764377593	3535	24429	14521
760604568	2605	24450	11569
730562988	3869	24819	12948
705139000	989	24973	13359
697132415	4276	25417	13904
671268907	2938	26058	14086
667132722	2621	25039	12893
614081109	4190	25289	13169
576143501	4806	27335	13943
575806223	2485	25024	12471
485430336	4459	26685	13001
454019960	2244	25186	12884
452996289	3202	25380	12016
452651486	2741	25085	11790
452651021	3188	25078	10896
421983723	4386	26448	13660
421297485	4316	25178	14514
420965117	4051	25857	14471
420252614	3356	25291	14259
389909109	2328	24856	11796
388284324	1926	25072	13662
329919036	3488	24803	11165
327838570	2735	24892	14210
949534412	1896	25068	13091
887148641	3996	26030	12572
610916994	3854	24927	11607
548488948	3791	24710	12107
453026883	3377	24878	12924
421305971	2925	24838	13717
612367371	3395	24736	13692
391289810	3278	24808	10610
5813009791	3406	25207	13913
5813009518	3415	25632	12476
5812989557	3266	25736	12883
1353690708	2363	24679	12315
1229538338	4011	26541	13330
1198504136	4669	27331	13755
1074678938	3718	25694	13468
1042656011	4302	26077	12956
981215328	3910	24986	14018
854106922	3036	24546	14558
609224408	2964	24490	14106
582700300	3014	24658	11499
576816635	3669	25233	13519
545786279	4804	26567	13799
485771504	2989	24400	13062
421975193	4137	27082	14658
421650982	4438	26474	14102
390616420	4169	25915	13326
390598284	3386	24718	13964
359564703	4098	25066	13552
359555152	2202	25363	13358
329214990	2436	24694	13692
328533857	4249	26021	13901
328524904	3359	25817	13892
328206519	3230	25434	13597
5901192948	4574	25054	14222
5813054421	2741	25217	12281
5813053731	2714	24156	12120
5813011066	3303	24901	14449
1043289707	1909	24544	13229
888084738	1385	24859	13065
359219263	3467	25794	14323
481653694	1466	23716	20542
5813040903	874	26050	21658
5813013530	886	26348	23760
5813013203	1723	23657	19955
5813013183	1161	26643	24019
5813012462	1223	27836	24452
5812980039	1670	26068	22082
883030091	1111	25588	22905
855043038	1632	25318	21812
699212545	1369	27271	23334
674001478	1889	25676	22374
668152044	1173	27131	24669
667841133	653	25661	22179
640220321	1335	26208	23809
638826442	876	24876	22986
638476210	1829	27567	24234
612285653	2107	24014	20042
607130326	1079	24677	21207
607109790	1279	26592	23491
606492411	956	27070	23983
606431658	771	26120	23351
603007915	1599	27682	24675
580546081	1778	27668	25137
576774002	1802	27238	24384
575042709	2621	28146	25834
574723544	1184	25108	22690
574378565	1532	24371	21306
574352231	1189	27629	23979
574128034	1640	25487	23038
549521047	722	25688	22518
547115923	1296	25749	21686
543770627	1411	24010	21809
542665187	1061	26507	22643
514406435	1416	25099	22109
514073634	1139	24556	20517
511970945	1175	27359	22962
486444499	1702	26215	23791
486073599	1132	25968	22440
485723857	900	25365	21914
482685041	3748	24593	20166
455728985	1070	26457	22983
454377810	1662	26648	24027
453018720	1225	23069	17561
452681716	1293	23845	20077
452676790	2535	24881	20657
452336396	1260	25243	23089
452327439	1244	25976	22826
450951445	1043	25977	21965
450933288	1053	27964	23823
424384254	1135	25464	22501
419880359	2145	27708	24737
391945237	1941	24450	21260
391276906	693	26755	24362
390931864	1238	22686	18257
390586997	1490	26533	22985
390254536	651	24048	18282
360595711	1643	24899	21396
360237353	1260	24899	20884
359560118	1276	25513	22080
358874595	2082	23516	19260
329206270	1861	24978	22139
327857238	3241	20668	16682
327152465	3525	24298	19899
325490014	2954	25801	21100
295456869	2627	24101	19603
295115429	4408	21074	17711
294437328	1924	23938	18981
5901196932	1193	24200	18832
5813132408	526	25306	21185
5813106089	1278	25064	21289
5813069285	1489	24829	20544
5813061564	1365	26972	22924
5813057923	1340	27406	24350
5813057660	907	23845	18515
5813055798	3841	19444	17388
5813039980	666	26077	22632
5813039931	1991	24643	20883
5813013792	1245	26108	23300
5813011770	881	27437	23578
5812980329	1554	24544	20908
948135822	4116	24264	20006
886066221	998	25614	23470
850636610	1517	26156	24218
761239957	4629	28198	29054
733005935	682	26715	24044
668552668	733	26754	23490
640915837	1666	25884	22544
638196102	1647	24198	20132
638148213	770	25677	23089
636792984	1024	25565	21162
633097828	2843	25771	20745
609168709	1844	27024	23904
606479285	614	26142	22242
577801333	759	25584	23735
575418068	1382	26873	25133
546123239	1162	24670	20208
516771668	1253	27235	22508
516762858	1600	24344	20476
485732870	2055	24331	20595
481989534	2025	27402	24902
451296290	1676	23642	18363
450933392	673	25121	22141
420235167	2098	23921	19531
356832459	4307	20285	17835
295470623	3039	24968	20835
295115628	3699	25180	20398
762262916	228	22858	13194
5901208658	1497	22414	17342
5901203780	708	22042	16347
5901197773	72	23431	13073
5901194395	604	22526	14434
5901194039	137	23061	12711
5901193783	824	20948	16105
5813090944	749	23062	13045
5813047024	612	18772	11256
5813035204	848	22096	15740
5813035168	141	22172	15700
5813035150	153	23422	12767
5813013443	240	23789	12370
5813012889	1555	21478	15144
5813012448	652	22358	14888
5813010799	2472	20815	16832
5813009261	993	21555	15834
1166761119	1012	22764	14521
979857196	759	20496	14284
975072882	489	21343	14044
947462997	1535	22001	16467
947453617	630	21899	15938
947103902	626	23060	14220
946123380	417	19263	12850
944729312	439	23197	13439
944055652	674	19674	12798
918468865	461	21196	13530
916773484	1179	22210	15620
916763916	495	22346	13659
913013165	519	21752	14135
912663435	245	22267	15997
911984113	865	22264	12895
886095820	1072	20546	15190
881986401	575	21910	15571
857451691	447	18777	12877
852976677	1536	23301	17852
852678239	410	18936	13402
851309562	426	20727	15102
849918343	125	22952	12329
822622842	2814	22796	18164
821306235	348	21505	15161
818888010	272	21513	12074
788173517	846	23268	14598
764339342	3070	22016	15162
761575136	262	20936	15742
761232088	970	22958	14914
761229983	230	18396	13328
760902933	220	22060	11750
760541793	1952	22856	15626
734667914	144	23823	12705
731923098	963	20438	14727
731270909	1704	22801	17752
730537677	818	22547	16456
729211483	1665	21365	17212
728483249	1246	19508	14966
727808408	2724	20394	16374
700884019	785	21473	15406
699161039	543	21930	14663
699160906	666	21468	16080
698829728	1096	22343	16934
697793250	826	21252	16554
697456597	1235	22604	15519
696772937	1423	21912	17021
696095464	1221	20780	16331
669857319	170	23686	13257
668485522	1718	20506	16459
668148078	1365	21328	16609
667141710	51	22289	16156
666451615	1804	20964	16722
665735597	1054	21612	14873
635385969	414	20504	14024
635091875	719	20908	14738
634712940	1732	22988	15092
634712475	1913	22211	17488
634363193	747	22658	15446
608465100	1142	21309	16247
605723658	625	22666	14024
576773752	396	21318	15640
575729037	715	22522	13301
573324939	542	21838	15048
545738451	1071	21908	16636
543333530	604	23006	14754
542639377	1085	21784	16216
542293528	666	21046	15216
511949534	717	22049	13423
483712161	614	20279	15523
421946059	531	20160	12134
419548541	792	23384	15023
389217959	1741	22424	16803
389204929	1667	21162	16000
330268940	2759	21280	16658
327499164	1088	21162	13612
298210543	558	19222	14322
295443136	2458	22240	18135
5813078261	1335	23012	16826
5813068669	1940	21600	16984
5813061690	675	20123	14855
5813055853	2489	22423	17614
5813019955	3412	21258	16908
5813019868	2287	21532	15361
829145708	622	19868	14130
580227374	1204	20892	15677
481657750	460	22636	15876
327147292	2174	22996	18425
1201615899	10914	32454	17328
1170865953	11869	32650	17077
5813078340	11070	32776	18396
731688775	11364	33480	19624
729997357	11738	32518	18998
5813058047	10894	32730	18866
5813041169	12738	32711	20130
890614937	11208	33162	18965
794462286	11464	32201	18614
737486877	12503	33207	21087
731357364	11874	32770	19538
730687491	9356	32317	17304
699976619	11164	32404	18818
675809900	11816	33690	19572
675127915	12812	34182	20420
610981584	12560	32878	20676
610299911	12256	32938	20151
607894716	11907	32917	18701
607221569	11217	32724	19431
579946370	12397	32009	18761
577205270	10626	32690	18328
576519520	11531	32459	19282
546507208	12244	32941	19679
546196205	11046	32070	18513
423096449	11688	32877	20559
862270098	11832	34836	19576
5901201676	10828	33278	18901
5813078739	11318	33103	19274
5813078350	12065	33351	20773
5813041304	13091	34685	19705
5812986870	11966	33440	21245
5812986547	12028	32943	20542
5812983128	11564	34256	19494
5812980915	11700	33159	19684
1572520204	11520	33778	20651
1325138116	10841	33681	18849
1298804357	11870	33807	18471
1200942353	11062	33918	17862
1200610109	11137	32856	17836
1200605580	11205	33876	20381
1200273581	14508	35384	19834
1171910380	11659	34090	18165
1170935308	10578	33219	18477
1169898618	12484	34408	17074
1169576040	11911	33449	18694
1140872223	14484	35474	20216
1140534972	13242	34743	20122
1140240894	11611	33857	20048
1140189329	10797	33611	17986
1139524692	11757	33908	21321
1139516013	11441	33755	18534
1139515440	10376	33330	17430
1109163019	13132	32482	18414
1109158650	10762	33600	17416
1108485790	11282	33327	18563
1108459071	11531	34249	18675
1108166986	11732	34010	18858
1108152508	14004	34580	20628
1101094884	11050	34016	18622
1077783627	12068	33942	21595
1077778869	13440	34534	19470
1077778701	12134	33765	20512
1077459090	12119	34165	16865
1077459077	12294	33196	17970
1077434447	11902	34362	18520
1047426385	13430	33606	19061
1047421689	13426	33069	18784
1046735096	13775	34964	20269
1046726261	13500	33838	18714
1015700298	13240	33886	20636
1015479949	12358	32286	20208
1015385741	13370	34394	20480
986089634	11744	33682	20974
979666456	10486	33335	17948
955733080	12010	33327	19299
947233211	11949	34672	20045
923989857	11551	33568	18981
915519608	10882	33199	18219
894707517	11646	34462	19226
894362173	10932	33680	18507
892614148	11484	34378	20109
885495731	10598	32778	18011
863331646	11356	33762	19244
862597411	9562	31636	17352
862270029	10924	33914	19176
861924744	11928	34006	19224
861574580	10222	32888	17974
861237607	11265	34226	19019
860905704	11752	33040	18944
860892243	11971	33490	20010
792800570	12087	34327	21352
761040902	12264	34158	19689
760703506	12135	32623	20521
732082028	11218	34084	18272
729007988	12341	34227	20816
704785058	10447	31996	18337
673413730	9796	32650	17593
642509080	12549	34614	20163
639655157	11315	32244	19500
576898212	12351	33361	20560
576566287	9805	32130	17740
483797945	11123	34068	19721
5901196318	1726	23836	15696
5813099605	1406	24184	15781
5813069640	1912	23934	15290
5813055709	4780	25746	18926
5813047053	3006	22255	16784
5813039875	3428	26699	19439
5813032753	2780	23532	16432
5813011298	2462	24272	18350
696850811	2468	22180	16282
544038013	2014	23441	16370
513339951	3810	24048	16051
510987433	3401	25364	19152
510282921	3912	22935	16557
484126552	3022	23304	16796
480276374	2377	22461	15776
479912747	3953	26646	19520
479912666	2440	24020	16391
453662475	2093	24554	16936
451952653	3086	22865	17385
450609788	1939	23811	16189
449241371	3874	26455	18185
423416887	2952	24088	15530
420567894	2289	23963	15609
390961490	3359	22785	17063
390271275	2016	23860	17535
327843160	4019	26223	16350
327158831	5072	27918	19092
326496740	1633	23885	16616
297221971	3330	23602	15897
297179343	1640	24346	16339
296544262	3849	24749	16095
296148102	864	25081	13940
295466276	763	24475	13833
265124786	2378	23206	17706
5901193416	2320	23576	15346
5813088391	1748	23229	14439
5813069636	1925	24272	14847
5813047772	3033	25916	18600
5813039877	2924	26082	17176
486880919	3554	25843	17484
484350664	4062	24330	16366
484015147	2601	24453	16467
480244962	2142	23103	15920
479908320	2936	26578	19978
454003707	2586	23064	15595
452953198	2252	25794	19040
420572095	1964	24330	15372
419919816	3693	22303	16631
418870503	2009	23191	15417
388553520	2783	23588	15646
356472628	4396	27204	19606
326817334	5652	28252	18862
326500709	1948	25748	18216
296841676	1626	24781	16599
295779961	2065	23185	14921
295124412	1824	25312	17720
790313423	5260	24826	17960
5813035213	2058	23270	16850
5813032721	3676	24615	16560
5813010968	2565	24214	15914
5812980494	4046	23392	16366
5812980473	2652	23475	17339
886527723	3958	25395	16262
852414623	4478	25315	15949
821366958	2391	26209	19365
821366556	2123	24986	17317
758960629	3144	25232	17077
728274770	2580	24646	17080
728230690	2549	25159	17116
727889637	2292	22364	16968
701915554	2872	22784	15801
697533563	2061	24298	16442
696859236	2334	22761	15264
666843563	4482	24292	16135
666503184	4165	23831	16176
665466951	3140	24522	16414
575409592	3188	24685	16931
575068849	1990	24743	17661
546412678	4446	24756	16153
544720220	2610	23230	16038
544383511	3566	23407	16952
544038227	3014	22773	16304
510921766	1619	23928	16226
483324087	3521	24212	15575
482637370	1836	23775	17025
480581727	3413	25048	16535
480240812	2958	24036	16032
479925776	2885	25694	17388
479908437	2363	23659	15972
420581268	1631	23450	16170
418585726	1950	23648	14968
389559112	1482	24398	15373
387878711	1635	23490	15192
358197600	1537	23950	14843
357522570	1097	23929	13722
326159593	1554	23474	15611
325826011	1391	23969	15266
295482578	1306	24414	13956
295470816	1931	23520	15786
5813096198	11707	32966	16898
5813070569	13850	33318	19252
761044410	11031	33231	15325
760358472	11742	33816	17444
760021137	11330	33704	17560
730005624	11969	32897	17627
728995438	10813	33538	16959
706473389	11167	33765	16777
700356592	11324	33098	16508
674760695	11027	33191	17353
673746538	11601	33239	16257
643060819	13844	34577	19146
642715875	11146	33295	16333
642715563	11902	33537	16411
609975449	10863	32896	16337
608948356	12104	34004	15928
579963818	10710	32937	17537
5813069696	13157	34098	18481
5813065506	12698	34421	18674
5813061934	11409	33353	17036
5813053669	11146	33051	16884
5813022469	9843	32624	16124
5813016915	11776	33186	17314
5813014029	11994	33494	17757
5813013678	11694	34037	16758
5812987236	12564	31973	18107
5812986876	11746	33921	16326
5812979232	10310	32995	15576
1355115431	12632	34206	16477
1233281209	11702	32974	16430
1232983358	9584	32136	16833
1232979445	9949	32736	16518
1229633648	11300	33644	15760
1202241942	13595	34090	19309
1201961255	12903	34417	18269
1201624330	13734	34962	19938
1200290859	12726	34366	17832
1171954356	13667	35098	19261
1171902272	12544	34784	18265
1171613286	13884	34748	19501
1171613107	13309	34614	18778
1171207096	10820	32700	16900
1170857299	10538	32372	17467
1167563540	12973	34580	19083
1141213129	9596	32425	16420
1141195327	11081	33755	17177
1140862679	10154	32520	17484
1140517447	13121	33558	18494
1140508414	13220	34203	19016
1110868515	13339	35046	19453
1110221199	15143	34981	19951
1110173824	13035	35072	19100
1110164795	10348	32746	16676
1109478369	13114	35020	18258
1105839176	13218	35099	18801
1078447660	13230	34618	18138
1078443080	12275	34301	18265
1077752379	11895	33477	17091
1041395080	9872	32928	16861
1009004209	15588	34984	21140
1008663864	11752	34271	17730
986098785	10108	33022	17379
954679716	12327	34341	17884
892959869	10977	33632	16218
892609503	9589	32567	16969
892286449	11980	34478	18004
892268533	11366	33819	16388
862947261	10102	32409	17066
862270125	13743	35001	18714
862265395	13925	34478	19850
861928967	12747	34853	17806
861583277	10703	33148	15663
861241941	12355	34584	17511
861237679	10487	33219	16576
769195048	10259	32928	16182
759681018	12109	32363	17541
734473582	11443	34075	17209
705454177	12038	33948	18032
704111734	11883	34194	17369
703438567	11010	33344	15810
703101952	12791	34976	18617
702069970	12599	33977	18349
699998408	10548	33236	16907
675447609	10651	33209	16131
669978138	12130	34022	16440
669666822	10410	32717	17221
644433538	14209	33693	19823
612034653	14183	34223	19590
453087379	14545	34721	19615
5813041349	34412	25930	20410
857210366	34402	25872	20916
826857417	34406	25874	20350
793439006	34394	25960	20784
732038716	34408	26040	20766
5813104563	2102	25196	14420
5813082780	3143	25459	15506
5813067769	3303	24604	15351
5812980732	2660	26320	17985
760306167	3083	26847	19126
735470305	3583	25435	16004
640276971	3095	24970	15600
609591891	2560	25748	15915
609591823	2186	25706	15453
609591686	2448	25497	14998
609247082	4080	25750	15869
607886496	2769	24886	14721
607212413	2937	24821	15045
577205852	2031	25864	14995
576864518	2725	25140	15154
548199677	2748	25330	15704
544435277	2489	25738	16792
516857964	4364	24831	15594
515092013	2454	24470	14946
513106377	1939	26621	16860
511660697	3259	25207	14925
485715511	2224	26067	16930
482732443	2430	25603	16404
391630222	3855	24784	15267
387556524	2149	26474	16306
331002291	3006	26621	17654
329582105	1776	25247	14666
5813087454	3408	27026	17995
5813020789	3428	26136	16898
5813019920	2811	25337	14597
609591989	2501	26198	17498
609591880	3536	26778	17024
609591758	3400	26078	16238
609591640	2234	25337	15714
609587618	3426	24806	14954
609587594	2014	25853	14601
609587511	3907	27293	18174
579260627	3740	25233	15133
579239039	4266	25455	15397
550280614	3737	26543	17396
548562283	4304	26969	17166
548225503	4008	25032	14918
543412036	2439	25345	14141
519249805	2788	26003	16335
518899771	3658	25154	15566
391599963	3090	25588	16108
361964228	3270	25142	16142
360315461	2376	24878	16392
359900300	2281	24747	15813
330640381	2218	25258	16081
330303073	2698	25150	16071
328265281	3198	24534	15928
328209735	2770	25372	16620
327509674	2714	24584	15529
326504486	3968	27006	17870
325484974	2246	24635	15296
298935146	2882	24931	16608
297860627	2975	24292	14947
5813055768	4922	27638	17141
5813019807	4389	26880	16615
5812981249	1676	25332	14125
759633968	1127	25410	14163
578919867	2582	25001	15469
578587420	2967	25484	14176
578587259	2300	25466	14624
574420970	2258	25832	14084
547551580	1601	25623	14489
544831533	2340	25040	14824
543023799	2034	25514	13930
542699260	1349	25235	13809
359628017	3523	25592	16584
330989587	4557	27262	17661
329215304	4654	27128	16156
327519295	4395	25076	15162
325814784	2266	25246	16687
299272806	3135	25814	16477
298245502	4180	26831	17618
297572235	4520	25976	15782
297519843	2765	24635	16054
296143923	2484	23991	15083
267223104	3236	26377	16680
266873401	3936	26658	16821
5813098306	1167	23798	18962
5813097073	791	22235	17669
5813068507	1867	21927	19414
5813057662	2744	22071	18669
5813047178	1643	23222	18485
5813047004	1814	22559	18172
5813039880	2079	22572	19475
5813035078	1156	23421	19042
5813010546	1062	23108	18022
698180927	2059	23280	20813
605090489	707	23412	18317
542643555	1492	23724	19593
541961750	1529	22953	18171
541961677	758	22768	18092
541624179	1587	21793	18168
511621576	854	25339	19932
511271379	1613	23967	19388
511262952	814	25838	20464
510943286	1617	22345	18793
480599285	1386	22769	18830
480586157	629	22993	17510
480262368	1143	21917	18056
480262270	860	22695	18515
480258191	1417	21903	18638
480257919	998	22644	17694
480257914	2034	24464	20189
480257896	1752	22807	19217
480257882	978	24310	19260
480257743	2586	16546	14442
480253500	1683	22900	19670
479917126	1758	22815	18606
450609707	1526	22061	17875
450267976	1516	21670	17556
449577409	2286	21778	18925
449227486	1020	22292	18614
449223379	691	23701	18781
449223347	1904	22152	18291
449223263	2935	24755	20450
448899493	2060	21446	18426
421292214	904	22350	18108
419929377	1231	23506	18651
419578845	2540	21568	18561
419234116	2432	21103	18205
418861761	2028	23069	18905
391604407	1362	22262	18332
390935343	2487	21471	18014
390919685	1786	23602	18654
390586752	643	22178	18675
389536816	2000	23236	20026
388513242	1854	21882	18652
360928792	2210	23168	19396
359555628	1430	22506	17830
359210479	2324	22022	18740
358878546	1604	23150	18982
357832762	2031	23334	19713
357496172	1209	22188	17505
356832508	2470	22194	19154
329566467	1140	23038	19178
328519904	1874	21411	18017
327220514	2511	24416	20219
326154371	1516	22027	19125
325834652	2972	24112	20019
325814669	1123	23051	18511
296489073	1618	22363	19532
296120593	492	23787	17681
295807429	1608	23610	19007
295799057	2595	22624	18659
295798962	1081	21799	17656
295785459	1990	22178	19090
295780154	2076	22459	18738
295461871	668	23443	17937
295461707	1512	23283	19528
295439322	1827	21678	18976
389204888	2306	23637	19993
5901195359	1174	24290	14976
5813047407	1667	25493	18438
5813047173	576	24896	16180
5813013173	84	24128	16444
5813010170	507	24176	16547
765029085	1074	24590	17560
673302212	1780	25079	19124
668466304	228	25256	14188
667444187	628	25247	16378
642612763	931	25516	17474
636451654	1143	24511	17144
605399330	478	24816	15015
603003871	864	24635	15210
549961114	1363	24446	17935
544012081	1098	24052	17872
542298702	290	25459	16149
542298159	416	25232	15083
541632940	1056	25143	17695
541628695	1734	25646	19307
541615798	908	24724	14190
517138678	1389	23926	18244
512976561	748	25056	15864
512294414	206	25871	15776
511949386	1032	23851	15522
483988886	218	25646	15108
481941922	662	25380	14196
481941863	84	26048	16150
481941855	405	23802	16671
481941832	428	25108	13902
481941688	622	24175	15432
481941611	1054	24309	15423
481600824	1506	24878	17633
452655734	474	24050	17242
451990898	1012	24296	18310
451986590	1171	24577	16509
451619617	1330	23900	17070
451619287	1222	24856	16820
450924155	791	24614	15825
450579065	1131	24670	18167
450574212	732	23844	16329
449910002	892	23609	17041
422312162	1464	24868	17189
422312023	873	23899	16818
422312019	1563	25177	18119
421638281	1079	25061	17167
421633905	225	24608	16138
420594200	788	25405	16922
420235118	96	25086	14970
420230547	1010	23879	17427
420226410	1026	24196	16557
419889751	539	25007	14492
419889682	802	23968	15921
419885042	582	24387	16025
419884971	1024	25094	18118
419884922	1231	24541	18577
419884905	1675	24482	16862
419880519	543	25402	14706
419880385	554	24403	15122
419548748	252	24524	15524
419543946	1936	25358	19557
419207462	879	24229	17305
392985492	1041	24796	16201
391625677	429	25455	15630
390935535	1455	24016	17488
390245740	637	24763	17455
360950551	1140	23644	17811
360927799	542	25245	17145
360573708	1044	24314	16059
359892436	248	24549	14804
359568205	672	24495	16433
329215923	851	24787	13713
5813020846	12050	30630	10568
1103076052	7384	29546	13040
1012298719	12487	31097	10245
977201905	11641	31610	10962
950233506	5579	28498	14519
922608418	8234	30432	12768
917497441	11892	31059	10275
891914014	7114	29584	13564
891577867	11430	31258	10503
891577717	9548	31047	11711
885163107	6808	29144	14011
796733296	8191	29900	12263
788519447	12134	31458	10742
760272462	10402	31286	11347
670219670	11225	32820	13103
666136034	11264	30908	11522
639875892	11244	30746	10891
608840926	7835	30717	13728
604070433	11624	30899	10816
576843029	9327	30960	12129
574027813	8688	30185	12140
573713481	12384	31226	11040
541347811	9954	30242	11338
390952738	7968	29449	12795
361968122	8484	29424	12284
361351171	11593	30264	10384
330604760	6140	28331	14248
5813068707	12150	31770	11264
5813022764	8060	30668	13344
1102761868	9103	30391	12310
950928506	6958	29681	14080
829162792	10326	30735	11558
796061060	7886	30058	12688
795723912	11048	31830	11515
549502646	11429	32132	11924
487968933	6291	28770	13820
454347237	9391	30315	11863
953302667	7892	30434	13786
827794325	7892	31406	14724
798114519	8034	31740	16100
5813021637	7708	29601	13359
5813021562	9196	32080	16522
5812983519	11870	32680	12632
1014016610	5748	28502	15404
983663810	6158	29258	14986
953639837	7431	30871	15131
953639677	9050	31974	16834
953635591	6552	29441	14551
953306312	8852	31955	15255
919850789	8374	31526	15287
917527702	9056	29691	12229
891582311	9650	29592	11970
890191937	5582	29556	16742
859507725	7402	30136	13672
857788501	7970	31259	14917
829155062	10780	31894	11877
828830111	9853	30557	11732
828477488	8599	30021	12529
767084239	8702	30649	12736
766410805	11272	32462	12340
766388652	7620	30130	13282
765034172	8188	29921	13033
764339062	10022	29828	11699
734352404	9788	32631	15319
642263196	7405	29892	14022
642262407	4832	26174	11894
515718803	7488	30511	14166
390352384	10457	29745	11374
766410696	11646	31992	11604
550962648	15118	25596	13164
5901195323	3532	27729	19592
5813129316	2304	27171	17722
5813077898	2706	26940	18380
5813040095	2193	27790	19136
5813040093	3652	28032	17687
5813021533	4510	28085	19062
5813010591	2342	27599	18129
5813010494	3043	28055	18649
5813009995	2225	27237	19227
5812980880	3346	27424	17740
793702856	2070	27242	18745
764408961	2922	27492	17648
702674134	5188	29574	18376
698180486	1871	27151	17700
696795331	3327	27552	17117
668144344	3096	27259	19387
665747387	2605	27470	18503
603681826	3642	27311	19261
579562628	2659	27703	18914
574011220	2062	28162	19552
573329873	3728	28422	19536
572988717	2024	26478	17194
549192526	3385	28449	19067
546083486	2525	28414	19696
544750318	2926	28062	19756
544007573	2645	27071	19658
516425902	2914	27200	17124
514396940	1924	27683	18785
511262901	1959	26721	17915
486116439	2941	27225	18908
483021600	3419	27794	18131
482002701	3461	28195	18408
454697392	3632	27950	18740
453665759	4480	27992	19816
452677169	2470	26720	17800
452664348	3457	27195	19862
451995819	2732	27024	17585
451987038	1830	27938	19759
451646040	2868	27840	18206
451644891	4200	28653	17942
451304268	2275	27781	18546
425803370	2614	26344	16706
423330124	5319	28837	19974
422656780	2655	27548	19491
422311625	1883	26899	18358
421957711	4168	27320	19220
421271305	3256	27842	19223
420956527	3614	27554	18438
392640591	2422	27895	19817
391954490	4031	27887	19728
391609333	2364	27432	19675
390948580	2851	27314	18044
390948259	2215	27128	18244
390589591	3788	27714	17872
390579059	3863	27956	19193
360578625	2941	27153	19904
360578457	3075	27422	18412
360254511	4079	27985	18429
329581637	4014	27512	18808
329211098	3396	27452	18901
328525017	3870	28252	18090
297921527	3289	26859	18438
297192204	3238	28636	19502
296846109	2717	28194	19164
296203608	3843	28656	18744
5813047371	9987	30460	10284
5813014526	9360	29412	10373
828826099	9711	29685	10203
733986433	11730	30059	8790
703387200	12453	30183	8923
612634432	6736	28834	12580
605762571	12007	30160	9172
548821347	10344	30029	9349
547443555	12302	29986	8534
547103110	11639	30479	9553
516832391	12518	29712	7974
487148422	11059	30993	10240
453333562	8951	30157	11338
612648076	10648	30938	10140
518183562	10694	30946	10042
5813048443	5467	27702	13970
1073691439	4966	27370	13140
889190744	8732	29848	11618
858838262	7231	29333	12568
765021328	10979	30435	10241
579596940	11387	30167	9095
578893446	10547	30528	9862
549219101	9506	30190	10288
548203966	11206	30289	9443
486812022	10912	30054	9142
486056294	11245	29837	8684
294450004	12326	30610	10130
1073354203	10584	30330	10276
5813110223	10704	30800	11121
5813079584	10036	30792	10698
5813075410	6780	29058	12821
5813070572	10619	30095	11036
5813062942	10935	31271	11277
5813058416	10968	30942	10572
5812980256	8665	29821	10866
1720333334	12540	30536	9350
1293688646	10888	30239	10606
1073694558	11087	31378	10878
1073354472	11374	30775	9921
949904655	6718	29116	13388
949904356	12045	30789	9867
889531496	11720	30256	9947
889194759	12106	30365	9542
889190964	9590	29344	10906
858838467	7664	29446	12328
828826327	9246	30575	11604
828485538	7832	29563	11957
798132291	10208	30503	11039
797796343	11208	30251	9949
768806088	9894	30836	11166
737093754	9172	29833	11667
737093692	9156	29382	10975
736748242	9403	30495	11245
674687388	9608	29931	10944
644001906	9110	29336	11462
581603800	5005	27364	13430
581599704	10048	30042	10719
581599674	11285	30113	10836
581262846	5742	28247	13720
575400910	10525	30551	10171
513339129	9543	30506	10787
485037749	9395	29489	9941
5901195496	3280	22664	7888
5813096129	2443	24291	9845
5813095395	3413	24164	9619
5813067728	2906	23985	9057
5813052205	2988	24234	10341
5813047019	2953	23583	8847
5813035242	3064	22915	8537
5813022459	3613	24642	10297
5813021223	3730	22912	8049
5813013202	3062	22677	8878
5813012028	3300	23911	8670
5813009578	2352	23800	10034
824349873	2427	24635	10813
769199010	2676	23072	8763
762274975	2469	24534	10294
729867599	4034	23192	8323
673426956	3928	23970	9431
638472166	2927	24655	10098
638136814	3961	25219	12022
611352588	3796	24168	9948
606461310	3973	23413	8850
605732731	3480	23465	8716
605046401	2990	23174	9003
583015749	3774	23892	8955
581652283	3477	24160	9102
575426742	2889	24375	9792
575384259	3634	24736	9813
574688277	2592	23645	9158
574040939	3775	23041	8785
573699419	3520	24125	12307
573683438	3410	23291	9284
573328325	3164	24466	9282
551989415	3228	23143	8121
551298257	3188	23786	9441
544107335	1346	23938	10890
543412198	3673	24143	8513
543321179	3233	24678	9638
517842578	3976	24902	10294
517838849	2873	23323	10073
513404289	3357	24301	10016
512765816	3361	23362	9830
511617404	1759	23900	10219
483017681	2908	24455	10929
482417237	3448	22602	8390
456187010	1557	23793	12664
455828904	3700	23709	8189
452336897	2705	24018	9451
451995734	3359	24945	10036
451382570	2197	23757	9655
425471220	2333	23286	9614
425121959	1930	23541	9879
424781115	2394	23270	9144
424780893	2895	23463	9584
424776680	3366	23512	8196
421957539	3640	23643	9286
392645419	2106	24074	10430
391716661	2118	24322	10874
361264970	2901	23855	9941
360314997	3012	23349	8468
360242173	2911	23694	11519
329206392	2974	22019	9059
328883562	3260	23706	10614
612712334	2539	23999	12806
579230376	3749	24101	13585
362299997	2360	24236	13871
5813087438	1364	26439	16886
5813078497	1204	24798	15642
5813075649	1716	26149	16790
5813069630	4978	27221	18566
5813019528	640	25862	15699
5813011744	1484	25670	15478
5813011061	1164	25948	15760
672960748	1808	25056	15826
607458700	854	25547	14834
606115742	1190	25109	14526
605801224	965	25591	15581
605153844	928	25972	16058
575120546	1260	25522	14726
575073196	1097	24716	14856
575073127	1891	25028	16975
572988605	1769	26624	18738
545743228	2237	26943	17269
543455619	2576	26378	16018
543446584	1135	25761	15276
517506265	1385	26144	17323
515385759	1891	25460	16889
514713432	2199	26048	16404
514375643	1027	26130	16543
512416525	1158	25695	16416
485711235	1890	25862	16610
485499217	2125	26588	18950
483000509	1765	26048	15345
482762384	2530	26761	16701
482757982	1591	25957	15817
482633514	1226	25202	16558
481636469	3518	24300	15020
456847100	1975	26527	20994
454386099	2558	26148	20845
453661962	630	25715	15344
453108601	1459	25347	17112
453009665	1350	24871	14092
451658249	1495	25762	16864
451650057	954	25148	14786
451624794	2243	26159	15429
451296383	2238	25644	17424
450354788	1636	24748	14823
391631218	2456	26808	18739
390280026	2537	26682	19326
389568268	2246	26116	15814
359892669	1831	25323	15219
358890923	2142	26439	18254
358529697	1750	25226	16426
328188777	1872	26256	15880
327596481	1358	25331	15767
327242169	932	25158	15356
326155085	1759	24816	15472
297584869	1924	26144	17800
295106899	1568	25782	15072
451386832	1661	26305	16434
328533896	1958	25706	16054
297917158	872	25465	16126
5813039860	3813	26885	18773
5813021576	2039	26195	18685
729280727	1635	25714	17721
482417172	1616	26066	18210
329561513	1554	24679	15956
328542218	1345	25295	15076
327860997	2590	26519	17274
266191395	3346	26517	17964
580926422	29732	29356	6722
360578907	16031	30048	7990
5901208044	14594	29859	7237
5813062781	15645	30890	8203
5813040092	15954	31424	8348
5813035115	16102	30496	7446
5813011756	15680	27346	5617
5813010284	13632	28451	6424
5813010201	13721	30478	8255
5812980272	13594	29304	7085
641291034	16766	27638	4710
634038998	15070	29790	7080
610938082	13819	28873	6838
604705430	13459	30410	8667
604700963	14817	27288	5459
604364004	14728	29353	6811
604009598	15163	30792	8343
580926331	14070	29420	7081
580585459	18381	30487	6287
580585427	14282	29221	6771
580585323	16446	30900	7849
580244242	14819	28419	6004
549895967	14744	31080	8378
547457113	13337	29899	7617
545082184	14117	28500	6681
541615964	13932	30869	8772
518847630	14725	30605	8110
512635818	15115	30403	7657
488550675	18586	30090	5812
487812620	14189	29968	7393
487454622	15374	31293	8557
485093313	14302	30397	7883
457516218	15554	30670	7866
457516092	15122	27826	5664
456427944	16044	31119	8114
455746581	13339	28727	6889
422635203	15134	30790	7995
421620469	15539	30285	7338
421310144	16040	30648	7826
392299403	15238	27206	5517
361955275	16938	30508	7105
361269864	14255	28795	6443
360914617	17099	30937	7570
360583021	14578	27505	5691
360246734	16860	30426	7498
360238069	13682	28037	6088
360236750	12743	29533	7550
359913782	14157	27751	5892
329906396	17669	30586	6835
329561615	14698	28882	6392
329215976	13616	30952	9065
329210713	12670	30868	9757
5813009312	17438	30373	7444
457520471	19003	30463	6259
329578247	18004	29877	6303
5813010770	9548	15102	11586
7112579848	4243	23597	7847
5813056243	4137	25802	11239
795745097	6390	28316	11408
790629881	9920	27736	6754
767433432	8530	29302	10224
761661626	9685	29929	9833
727153132	3965	25159	9936
642948546	8516	29018	9601
637483692	4396.31	24599.5	7921.71
578189576	4592	25172	8414
546464512	4210	23170	7514
486410031	9873	29685	9396
484359384	8788	25403	5507
484355636	4983	23683	5921
454347852	4450	23188	6790
453708274	8510	29263	10681
422674339	9453	29516	9500
421668365	3733	23379	7696
421318649	4658	26440	11250
391958263	4062	24080	7844
391652073	3882	25282	11132
391617921	7237	24277	5302
390909624	9115	23909	4970
390612328	5178	23176	5533
359913281	4368	25579	9616
358877435	3958	25484	11544
357859600	4338	26271	11747
328909029	8920	29403	10061
328861072	8131	29264	11040
328543082	8221	28544	8995
5813055904	7204	29191	12182
582027317	5262	26866	10192
576821609	4232	26560	12752
485029592	3761	24500	9003
452673056	4108	25854	11906
449905648	6843	27152	8332
390918452	8938	26062	5807
390564245	8969	29561	10584
298547436	9011	29308	9596
5813039922	7225	29114	11746
5813039919	4127	24712	8620
5813008942	4704	26203	10291
5812980497	5440	27043	10753
765072733	4026	23564	7202
581013183	8108	28724	9708
483042692	4654	23489	6325
454330437	8930	29097	9110
453989516	7956	24928	5567
453035422	4114	24259	8441
425060903	4120	25057	9229
421654726	3729	24736	9426
391976125	9171	30120	10762
390947722	4110	25515	10473
390599010	7796	29384	11546
389929872	8324	29764	11505
326811922	7307	25577	5918
5813079244	10586	30741	19006
5813010471	11094	32345	21235
1783362106	10872	29631	18186
1750419433	11084	30174	18358
1535769552	11212	30857	18163
1379907704	11537	30279	19876
1284394253	10033	30026	18378
1282788953	9752	30291	18833
1189727041	12170	31548	18512
1129302146	10678	30279	18979
918529614	10696	30138	18223
893628094	10718	30721	17959
892609630	11188	30648	19112
892600621	10856	29991	19418
892277790	10932	29118	17966
892259847	12038	31259	18024
862615150	11846	31722	17710
862265490	9371	30299	18443
861242399	11064	30575	18555
853376855	11415	32634	20298
821625208	11104	31779	19537
791307174	11090	31479	19063
761636549	11405	32598	21182
732686529	11770	33013	21151
609233083	10251	30875	18853
608534083	12172	32282	19478
608188506	10184	31229	19410
604722017	10022	31686	20140
602990602	10219	31349	19011
580231908	10730	31466	19466
542652400	11673	32570	20869
541970375	10880	31557	19877
515096130	11146	31986	19864
488231898	12030	31934	19668
456432557	10298	31718	19449
453031248	11383	32267	20895
452673242	11790	32130	19410
329216050	10581	31834	19988
5813016762	11174	30550	19331
701733434	9787	31434	18661
670547617	11801	30921	20606
545444996	11395	31156	19136
420723066	11813	31148	19859
5813014028	9905	31377	17830
1440252127	10434	30348	19270
956398176	6527	29955	17860
925008763	10686	31296	18716
769544445	10031	31558	18385
708290604	9253	31265	18096
675779986	8499	31835	16550
673072855	10607	31860	18791
672407642	9522	30838	18584
666200256	11945	31344	19426
327532246	6188	26961	18241
5813010255	5313	28239	16107
730942383	4357	26978	15691
484402369	4083	27124	15726
453026641	4040	26892	15437
452685249	4472	26064	14923
449250041	5975	28145	18265
421992055	5766	28507	16459
421655012	5248	28266	16738
421650988	4758	28559	16489
420952125	4335	27463	16131
420623873	4478	26968	15202
419588136	4744	27852	16062
418556051	4796	28133	17164
418214549	5172	28686	17200
391311186	4754	28132	16496
391297978	5494	28310	15908
390969969	5349	28722	16444
390919468	4587	28094	15817
390279635	5129	28976	16798
390275105	5530	29534	17330
389934175	4939	26459	15551
389247395	3025	25827	14592
386842280	4396	27560	16576
359218739	3644	26312	14842
358870425	3917	27137	16360
356490891	3936	26716	16072
329566187	4627	28414	17748
326810603	3321	27183	16785
295137019	6236	29534	17704
422000744	5689	28489	16945
327852122	5334	27924	15497
298262867	4932	28374	16004
296164879	3472	27022	17522
295482551	5671	29051	16966
5813056896	3752	25870	15358
5813009391	4447	27543	17170
5813009352	6142	28593	17342
421605182	2914	26700	16470
391310849	5362	28224	17190
389575937	4714	28888	17406
357842366	4138	27586	15598
328875073	5006	28350	15528
327158282	3679	27142	15891
298590924	3598	25810	14852
297558862	4096	26484	15265
297166197	5211	28749	15770
296838734	4415	25982	15330
296502002	4552	27405	15692
296496999	3690	27571	16629
1163509685	2298	23690	12316
1131810172	2332	23860	13465
1105083895	2521	23503	13021
1074674316	4072	24540	13528
1009600421	1776	23655	11659
921590115	2170	24516	12060
919177076	3400	23739	14012
766738741	3663	24136	10587
574706585	3791	23684	9921
5813075517	2062	23708	12627
1198844628	1250	24260	11931
5813069462	3236	24212	11864
5813037890	3454	23755	10160
5812987090	3429	24392	13286
1230220003	1615	24636	12155
1198844575	1864	23999	10843
1198844082	4081	24555	14057
1162849350	2785	24111	13823
1162849313	2245	23127	12849
1131814976	1200	24526	12480
1131810273	1822	23801	13219
1131485772	2870	23844	13383
1105713515	1819	24607	12735
1105713483	1601	24171	12370
1074337946	3165	24299	12567
1074337817	3247	24132	13767
1074333284	1282	23622	11372
1074057874	1558	24339	11666
1044377644	3640	24234	12874
1044356616	1411	23738	12089
1044339802	996	24097	12304
1043700428	1243	24106	11383
1043669697	1968	24136	12923
1043298586	1603	23179	11194
1043022708	3213	24132	10897
1042703654	2098	24196	11404
1041001961	3896	24584	12694
1039293613	1660	24165	11176
1014327691	2671	24130	11283
890883360	2306	24682	11350
797423594	3725	24197	11412
797082982	1888	24025	11915
766389431	3775	24460	10983
736079298	2100	23617	11198
735008444	2745	23830	10445
392304239	2875	23589	12173
5901195487	537	24336	17841
5813011441	1097	24701	19010
5813009789	1018	25890	20888
1104004164	1034	25500	19411
890192601	951	27069	21625
859490096	917	26419	21447
859489348	1492	26043	20966
859148698	568	26696	21387
828455332	1196	26053	21386
828455051	1043	26978	21281
766384925	2119	25695	20481
704319193	771	26993	20819
674009814	1017	26670	21866
672287506	690	25155	19318
671933799	486	26404	20092
641567225	1379	25078	19532
638204954	990	26439	20808
608546564	196	24114	17885
608491067	480	26700	20492
607820937	484	24560	18744
604735525	366	23700	18220
578841489	892	26558	20332
578521941	341	26647	19242
578151363	790	26982	20390
574710121	623	24161	18725
573346324	331	24465	18091
517458316	713	26143	21065
517117602	636	27262	21830
516098538	1628	24812	19877
513357277	640	27082	21313
485736803	214	27025	21170
484377189	893	26369	22153
483711811	646	26512	20967
483354202	300	27118	20786
483038957	1016	26849	22283
478928628	2583	25224	21196
452331917	884	27002	22080
423684795	252	26741	20815
422666053	1286	27045	21918
422644053	925	26811	22749
391954889	2559	25374	20467
360237650	1957	25892	20807
797420557	1422	26376	21874
5813078494	5332	28255	19635
5813067725	4986	27956	17950
5813057216	4289	28206	17268
5813026622	2696	25947	14373
5813010210	3043	26713	16941
5813008938	3142	26642	15670
640963528	6092	28885	18815
483349859	2557	25860	14809
421642764	3656	27028	15414
421318463	4682	28231	18153
421313563	4254	27548	17800
420973599	2711	25852	15440
390258187	4079	27322	15163
359918228	4063	26072	15063
359897526	3762	26892	14916
329966674	3325	26570	15267
328538398	3021	26228	14813
328193076	3265	26123	15329
296505463	4042	27916	16686
295820056	4346	28143	16309
5813009449	2985	26251	15905
453030534	4186	28044	17744
357505462	4177	25582	15031
330937034	3797	27835	17113
328860895	5199	29194	17533
328530120	3295	26647	16214
328201793	3864	25448	14720
296829531	4870	27554	16543
295814932	4803	26516	15118
294782432	4960	27114	15590
421642652	3354	27106	16218
421305688	3924	27242	17471
390628719	3248	26300	14458
390279522	4947	27477	15929
359560701	3338	26001	15795
330256546	4497	26547	15408
329561679	2765	26283	15275
328524867	3963	26159	15759
328179117	3066	25620	14976
327531576	3949	27634	16182
297192193	4568	26667	15793
297165904	3998	27337	16993
5813105722	2246	26033	21781
5813010511	970	24982	21526
5813009276	2511	22877	21928
698185483	1947	23824	21360
696126258	1393	26774	22253
665454282	3488	16560	16000
633793553	1924	23477	22287
575081131	914	24710	19528
574377845	3107	21761	22172
574377562	1354	27130	23765
572046627	1648	26436	22598
544699051	5316	19593	20486
511271574	1532	24350	22300
482680447	1564	24006	21478
481264051	1892	25601	22033
420908078	1357	25400	20847
419575044	1549	25669	20351
389545760	2386	25475	21779
360284300	1787	25590	21378
360255138	3998	26146	20367
359581549	1555	24038	20885
329560716	3396	25430	20588
326817510	1931	25003	20292
295814411	1721	25096	22566
294445804	2090	25382	20908
422622063	4832	26330	14336
1198132041	5282	27873	14419
801257348	4806	26924	14684
576079106	4744	27694	15220
298258714	5365	28039	15000
5813014032	7339	30466	14764
821703262	5957	28277	14755
739256609	6224	28904	14536
708208811	6889	30002	14748
699358695	4729	27628	14643
674108632	3798	26594	14597
702152113	34398	32602	12220
792326206	875	23555	13109
5813027276	2888	23218	14783
1573336031	3075	22120	15703
1135441187	1316	24214	13261
1013982515	2088	22452	14736
981194127	2131	24663	14238
5813027132	5128	25282	14998
5812987694	2331	23289	13669
1136752885	2336	24024	14576
1136407269	3092	21826	16098
950880008	1692	23872	14136
5901203505	13495	31529	10414
706831482	11313	31494	11728
702364805	13151	30523	9092
5812980529	13592	31243	9609
486544396	14451	31001	8815
484355328	12033	32927	13235
362041442	14076	31219	9258
952978874	10712	30254	11701
952642507	11292	30109	11417
859152522	14850	31455	8839
609893831	11670	33150	14199
359931311	12827	30010	8463
5813021632	12869	31837	11141
703282980	18409	30593	7027
516806504	17179	31325	7993
735708012	14801	27743	6017
728912816	18548	29504	5385
1670969318	13239	30981	10150
1417810944	13505	31578	10863
1411737459	11853	30863	11321
1138855577	12843	31270	10661
821344463	18721	29329	5863
800579317	14522	31541	9388
669977676	2356	23829	16812
577244511	3423	22463	16293
5813055862	3462	23052	16194
758674661	2362	24902	18103
673068602	2932	23954	16800
665479890	2368	25224	18730
449218986	3794	25494	19716
698979607	3537	26140	19970
390330983	3567	23725	16585
5813056917	1869	24504	18336
448260940	3095	25069	18641
5813064789	2694	24390	17626
296544364	4065	25949	19272
5813068769	21038	29562	4744
644450686	21750	32156	6210
297251714	19818	30063	6382
5813032847	20856	31464	7012
5813075931	20846	29865	5426
5813062858	21504	31679	7133
5813056054	21262	31163	5291
5813011868	23264	30917	4901
1010010166	22041	31647	7459
945894581	23627	31715	6460
884484964	20494	30538	5273
857235574	21070	32536	7245
829542849	21558	31232	7888
824470535	21136	31344	6798
791406204	21282	30904	7400
763116811	22555	29845	6780
736174181	22684	31122	4709
675490252	22145	31615	7982
643376222	21348	30289	5214
609281007	21836	30472	5208
582381054	22076	31429	5237
582381047	20384	29832	5563
549611256	19744	29344	5895
545872467	20441	29819	6346
519629116	22721	29948	7390
514837265	22439	32473	6341
488922181	19633	29764	5317
487887067	21793	32531	6667
360310976	20840	27778	4808
1008680614	20704	31168	5888
913810052	20200	31323	6189
701055731	20214	31374	6300
5901203180	22628	30158	4926
5901193173	20794	30189	4983
5813132515	20465	28543	5475
5813130229	22812	30270	6599
5813064414	22404	29872	5580
5813058342	22949	30523	7855
5813058320	19975	30511	5594
5813058008	22638	30474	5327
5813055833	21930	30023	6091
5813022591	23220	31572	7205
5813015614	22189	30270	5274
5812997319	22278	30819	5160
5812989469	23045	31448	8354
5812989377	22138	30051	4875
1779796258	21362	30687	5606
1718439069	20508	30966	5591
1718114551	21770	31234	6896
1688115933	22764	31000	5513
1628135911	21526	29956	6455
1595922583	21011	30871	5468
1502817538	22140	31516	6606
1502536546	20687	29462	5707
1502200626	21526	30800	5970
1440804168	22518	29923	6204
1378393109	22328	32066	5834
1286242549	23419	31452	5359
1256242994	22372	31778	6888
1225540409	22604	30750	7810
1132431845	22637	31440	6623
1132060387	21385	31386	7508
1100041650	19549	30323	5879
1008620177	22699	30898	7113
922988906	20964	30455	5343
919659561	21960	32045	7085
919318621	22187	32099	7522
919314747	22048	30948	7724
919314668	22914	32664	7124
918973470	21919	30621	6430
884856749	22112	30827	5619
884480476	22040	31844	8600
858962600	21659	31632	8322
856886459	22660	31938	6014
768253675	22664	32316	6665
767912577	22600	32062	9068
767571751	23831	30924	5526
767571712	22834	31572	6927
737218956	23109	31642	7814
737218848	22328	30235	5999
737218831	23530	32389	6760
737218823	22658	31624	7412
737218764	23580	32257	6365
737218753	21889	31059	7274
737218741	21828	30499	7526
737218738	22280	31315	6869
737218701	22510	30667	6041
737218700	21575	30417	6993
737218650	23879	31017	5174
737218635	22326	31551	8597
737218550	22667	31220	8602
737218533	22481	31418	6073
736877989	21124	30135	6747
736877789	22531	29718	5041
730717696	20868	29076	5915
706525097	23098	31398	6520
706525068	22580	31542	8216
706524889	22674	32060	7560
706524876	21607	30460	6172
706520453	20372	30477	6922
706183893	22928	31689	5452
706183872	22609	31057	5849
706183871	22044	29805	5354
706183853	23514	32014	5792
706183807	22997	32267	6175
706183789	23099	31039	5916
706183770	22366	30523	6716
706183728	22499	30852	6528
675835107	23019	30936	8596
675822802	20556	30717	6040
675490215	21136	29754	6238
675490171	22154	30915	6026
675490109	22808	30065	5409
675490017	22203	29439	5477
675490002	22726	31889	8645
675489962	21901	30235	5643
675489921	22516	32767	6873
675489914	21929	29528	6496
675489881	22522	31221	7632
675489869	22401	31027	8016
675485886	22693	31181	5163
675148961	21478	29451	6075
673772212	21552	32788	7556
644788121	20067	28754	5827
644455092	22282	30958	7099
644455046	22407	30243	7241
644450565	19621	31087	7190
644425543	21388	31659	6197
643401816	23407	30294	5343
640691209	21974	32576	7185
635908014	21841	31365	5879
613756849	22404	31411	5472
613756808	22034	31073	6523
613756712	21458	32274	7474
613756703	23833	31411	5523
613420343	20393	29334	4925
611029037	21206	32214	6814
608301148	21342	30836	6860
607925257	21018	31044	6156
604856102	23329	30832	5437
576574889	20628	30184	6164
[truncated: 20,561 more rows]
