# Supplementary material for: Information flow, cell types and stereotypy in a full olfactory connectome
Source: eLife. 2021 May 25;10:e66018. doi: 10.7554/eLife.66018 (PMC8298098; doi:10.7554/eLife.66018)
Supplement: Supplementary file 9. — Nodes downstream of this position in the 3D structure of the neuron indicated with bodyid, belong to the compartment type designated by Label. A product of running flow_centrality on hemibrain neurons, exists as hemibrain_splitpoints in our R package hemibrainr. [file elife-66018-supp9.csv]

x
bodyid
position
point
X
Y
Z
