# Supplementary material for: Information flow, cell types and stereotypy in a full olfactory connectome
Source: eLife. 2021 May 25;10:e66018. doi: 10.7554/eLife.66018 (PMC8298098; doi:10.7554/eLife.66018)
Supplement: Supplementary file 10. — This mesh was generated by first merging individual ROI meshes from neuPrint and then filling the gaps in between in a semi-manual process. It also exists as hemibrain.surf in our R package hemibrainr. [file elife-66018-supp10.obj]

# Blender v2.80 (sub 74) OBJ File: ''
# www.blender.org
o hemibrain_volume_filled
v 116.421143 8243.780273 20759.023438
v 102.937744 8198.453125 21205.060547
v 261.935791 8243.780273 20759.023438
v 450.469727 8217.918945 21248.394531
v 738.527588 8306.292969 21473.912109
v 590.732666 11806.901367 16749.781250
v 116.421143 12298.194336 16666.457031
v 125.854004 13013.082031 16189.865234
v 88.007080 12784.142578 16476.294922
v 411.794800 12119.256836 16608.376953
v 438.329346 13004.738281 16189.271484
v 438.329346 12709.796875 16293.664062
v 866.124268 11806.901367 16749.781250
v 1048.936279 12125.068359 16634.855469
v 740.027588 13013.646484 16189.865234
v 973.278320 12784.480469 16348.908203
v 1476.829590 12307.879883 16710.585938
v 1651.312744 12739.952148 16658.955078
v 1952.341309 12939.430664 16762.466797
v 640.129639 10591.047852 17854.251953
v 711.764893 10059.694336 18988.798828
v 562.316895 10481.678711 18255.644531
v 546.109863 10331.627930 18813.513672
v 116.421143 8729.504883 20192.650391
v 116.421143 9417.413086 19695.224609
v 94.847778 9211.021484 20007.730469
v 294.483032 8729.504883 20192.650391
v 231.986084 9417.413086 19695.224609
v 459.862305 9234.275391 20055.740234
v 94.847778 8562.323242 20583.507812
v 62.487671 8606.491211 21205.060547
v 62.487671 9196.375977 20615.177734
v 62.487671 9196.375000 21205.060547
v 474.837158 8559.567383 20572.810547
v 655.191162 8389.629883 21080.656250
v 687.738281 9051.137695 20386.599609
v 102.937744 9786.258789 19646.419922
v 62.487671 9786.258789 20025.294922
v 126.804443 10384.487305 19675.302734
v 116.085083 10403.739258 19972.255859
v 464.158203 9894.228516 19513.853516
v 605.369873 9758.485352 19961.416016
v 297.191162 10333.939453 19487.849609
v 210.378418 10468.247070 20020.634766
v 62.487671 9786.258789 20615.177734
v 62.487671 9786.257812 21205.060547
v 102.937744 10274.971680 20615.177734
v 102.937744 10259.345703 21205.060547
v 198.041260 10569.913086 20615.177734
v 229.292480 10554.287109 21205.060547
v 133.594849 11243.432617 17901.501953
v 95.586914 11729.157227 17228.281250
v 80.151123 11541.881836 17689.228516
v 590.744629 11139.262695 17269.951172
v 418.809448 10994.719727 17681.248047
v 394.110962 11571.401367 17052.488281
v 197.489258 11335.901367 17508.244141
v 100.192505 11177.969727 18255.644531
v 87.312134 11090.021484 18845.527344
v 28.491333 11555.908203 18255.644531
v 31.236572 11555.908203 18845.527344
v 267.375244 10883.028320 18255.644531
v 220.507568 10795.080078 18845.527344
v 69.846802 12119.256836 17049.343750
v -0.014526 12145.791016 17665.761719
v 15.610962 12735.674805 17075.876953
v -0.014526 12735.674805 17665.761719
v 197.477173 11904.939453 16835.025391
v -0.014526 12145.791016 18255.644531
v 15.610962 12145.791016 18845.527344
v -0.014526 12735.674805 18255.644531
v -0.014526 12735.674805 18845.527344
v 110.624512 10944.134766 19485.419922
v 110.624512 10919.133789 20020.634766
v 62.487671 11555.908203 19435.410156
v 62.487671 11555.908203 20025.294922
v 184.384033 10732.913086 19322.130859
v 163.549805 10691.245117 20214.156250
v 102.937744 11016.493164 20615.177734
v 102.937744 11036.716797 21205.060547
v 62.487671 11555.908203 20615.177734
v 62.487671 11555.907227 21205.060547
v 198.041260 10721.551758 20615.177734
v 229.292480 10741.775391 21205.060547
v 46.862183 12145.791016 19435.410156
v 62.487671 12145.791016 20025.294922
v 31.236572 12735.674805 19435.410156
v 62.487671 12735.674805 20025.294922
v 62.487671 12145.791016 20615.177734
v 62.487671 12145.790039 21205.060547
v 62.487671 12735.674805 20615.177734
v 62.487671 12735.673828 21205.060547
v 1028.212646 10518.266602 17788.064453
v 1618.095703 10545.340820 17834.943359
v 1150.651123 10016.420898 18464.982422
v 983.699219 9938.180664 18813.513672
v 983.699219 10209.374023 18263.271484
v 757.395752 10105.325195 18595.541016
v 1618.095703 10012.309570 18462.943359
v 1618.095703 9784.190430 18845.527344
v 1618.095703 10250.399414 18168.001953
v 1985.968506 10627.147461 17916.755859
v 1985.966309 10054.125977 18519.333984
v 2192.748047 9916.865234 18835.173828
v 2182.595215 10395.195312 18290.962891
v 2379.221924 10163.243164 18631.642578
v 2680.010254 9986.462891 19024.898438
v 2638.351562 10556.498047 18455.849609
v 2855.808594 10328.618164 18807.921875
v 972.565430 9439.896484 20213.398438
v 1743.119141 9473.375977 19710.802734
v 1575.133057 9396.519531 19982.333984
v 780.507812 8782.885742 20779.853516
v 830.610352 8594.351562 21248.394531
v 962.541992 9267.909180 20601.484375
v 1107.708496 9252.360352 21205.060547
v 1618.095703 9231.695312 20615.177734
v 1618.095703 9166.527344 21205.060547
v 1028.212646 9789.580078 19435.410156
v 932.682861 9617.088867 20034.578125
v 1575.133057 9546.510742 19482.667969
v 1349.863525 9494.209961 19757.066406
v 1974.255615 9473.375977 19710.802734
v 2185.721436 9384.018555 19997.556641
v 2797.862305 9431.217773 20172.765625
v 2326.454834 8892.612305 21470.347656
v 2207.979004 9147.446289 20615.177734
v 2161.087891 8966.031250 21246.255859
v 2797.862305 8888.201172 21455.519531
v 2797.862305 9230.479492 20615.177734
v 2797.862305 8995.636719 21160.578125
v 2185.721436 9593.416016 19482.667969
v 2367.510986 9515.043945 19782.437500
v 2845.127441 9839.356445 19388.144531
v 2797.862305 9555.006836 19877.822266
v 3073.265625 10100.738281 19160.005859
v 1028.212646 11089.859375 17246.587891
v 1028.212646 10794.917969 17493.123047
v 1048.936279 11588.527344 16936.314453
v 1618.095703 11179.436523 17320.541016
v 1618.095703 10884.495117 17540.001953
v 1618.095703 11555.908203 17119.496094
v 1259.379639 11914.624023 16812.283203
v 1651.312744 12125.068359 16862.361328
v 1870.084961 12546.175781 16791.449219
v 1923.454590 11258.698242 17368.552734
v 2151.339355 11016.328125 17705.640625
v 2060.508057 11555.908203 17292.035156
v 2355.449707 11555.908203 17471.414062
v 2596.673828 11167.213867 17887.783203
v 2795.125977 11608.639648 17798.966797
v 2379.224121 10773.958008 18062.591797
v 2814.140625 10949.747070 18259.712891
v 3031.607422 10732.280273 18590.947266
v 2989.929199 11447.165039 18063.576172
v 2260.717041 12105.553711 17173.259766
v 2492.503418 11882.100586 17381.236328
v 2172.572998 12739.952148 16962.306641
v 2563.046387 12275.356445 17330.447266
v 2774.949707 12105.553711 17558.181641
v 2608.735352 12735.674805 17294.708984
v 2903.676758 12735.674805 17528.677734
v 3249.059570 10493.993164 18984.201172
v 3186.557129 9470.794922 20268.150391
v 3258.180176 8892.612305 21470.347656
v 3385.008789 9342.457031 20592.919922
v 3427.982910 9008.046875 21246.255859
v 3859.776855 9397.563477 20774.708984
v 4024.894043 9268.042969 21157.794922
v 3387.745117 9978.653320 19596.562500
v 3385.008789 9669.458008 20053.031250
v 3422.510254 10328.875977 19293.613281
v 3683.982910 10079.904297 19729.056641
v 3919.417969 9985.893555 20083.505859
v 3919.417969 10434.344727 19635.037109
v 4077.238770 10276.520508 19925.683594
v 3579.812988 9531.691406 20381.455078
v 4024.894043 9644.463867 20592.919922
v 4253.031738 9510.855469 20929.656250
v 4407.979492 9397.562500 21322.912109
v 4273.866211 10079.904297 20318.939453
v 4273.877930 10669.775391 19729.042969
v 4470.500000 10473.153320 20122.310547
v 4863.749512 10669.788086 20318.939453
v 4509.301270 9960.891602 20660.886719
v 4589.769043 9644.460938 21157.794922
v 4667.122070 10276.532227 20494.732422
v 4884.583496 10059.069336 20887.988281
v 4980.617188 9963.035156 21205.060547
v 4982.762695 10434.352539 20660.886719
v 5299.191895 10366.383789 21170.294922
v 3103.232910 11840.420898 17950.275391
v 3207.389160 11125.535156 18456.833984
v 3424.852051 10928.913086 18799.826172
v 3351.938477 11602.130859 18288.232422
v 3600.644043 11363.841797 18615.451172
v 3838.942383 11125.545898 19008.708984
v 3734.781738 11757.096680 18512.890625
v 3983.489746 11529.217773 18831.078125
v 3162.164551 12145.791016 17892.152344
v 3261.939453 12735.674805 17823.619141
v 3457.106445 12145.791016 18151.027344
v 3556.881348 12735.674805 18071.701172
v 3813.736816 12145.791016 18445.968750
v 4108.678223 12145.791016 18667.597656
v 3897.895020 12735.674805 18366.642578
v 4192.836914 12735.674805 18614.689453
v 4374.364258 11694.594727 19046.703125
v 4456.512695 12145.791016 18962.539062
v 4487.763672 12735.674805 18909.630859
v 3642.314941 10732.290039 19180.841797
v 4012.393555 10943.760742 19293.607422
v 4232.198242 11301.338867 19160.005859
v 4403.623047 10966.024414 19596.554688
v 4698.564941 10966.024414 19907.130859
v 4606.809570 11508.383789 19404.699219
v 4839.254883 11322.172852 19770.724609
v 4960.311035 10966.024414 20202.072266
v 4914.550293 11715.428711 19649.392578
v 5075.270508 11533.643555 19990.529297
v 5282.946777 10931.260742 20617.914062
v 5432.798340 10711.456055 20950.490234
v 5384.343750 11555.908203 20414.798828
v 4751.454102 12145.791016 19282.718750
v 4782.705078 12735.674805 19251.468750
v 4962.255371 12145.791016 19577.660156
v 5238.816895 12145.791016 20025.294922
v 4983.911621 12735.674805 19546.410156
v 5311.346191 12677.463867 20084.283203
v 5433.956543 12145.791016 20338.615234
v 5450.132812 12677.463867 20322.439453
v 5525.255371 10556.507812 21343.746094
v 7054.436523 12999.569336 17257.828125
v 7038.970703 12999.670898 17665.761719
v 7516.927734 12999.670898 17263.833984
v 7516.927734 12968.725586 17665.761719
v 7145.514648 13020.403320 18037.173828
v 7555.032227 12999.732422 18242.539062
v 7777.063477 13020.403320 18585.388672
v 5521.595703 11104.710938 20816.365234
v 5624.369141 10931.259766 21170.294922
v 5578.690918 11555.908203 20709.740234
v 5824.010742 11555.907227 21205.060547
v 5601.157227 12145.791016 20633.556641
v 5859.357422 12145.790039 21205.060547
v 5565.920410 12677.463867 20558.392578
v 5821.265625 12735.673828 21205.060547
v 1883.790283 17109.718750 9652.270508
v 1815.368652 17454.740234 9557.811523
v 2436.961914 16525.775391 9631.423828
v 2797.862305 16441.203125 9502.951172
v 2971.099609 17607.156250 8452.545898
v 2432.017334 17068.048828 9054.129883
v 2237.862061 16892.255859 9445.219727
v 2342.767578 17454.740234 8977.352539
v 2047.825928 17454.740234 9262.870117
v 2797.862305 16944.787109 8946.838867
v 2797.862305 16649.845703 9208.009766
v 2783.828125 17428.212891 8670.922852
v 1904.624512 16561.505859 10283.809570
v 1832.848389 16489.738281 10587.164062
v 1734.027344 16375.298828 11177.046875
v 1702.776367 16337.935547 11766.930664
v 1298.767578 17102.974609 10802.069336
v 1305.524414 17669.656250 10253.758789
v 1231.942627 17465.712891 10598.129883
v 1804.918457 16893.798828 10051.221680
v 1527.409912 16889.751953 10598.129883
v 1513.426025 17465.712891 10033.191406
v 1377.243652 17276.400391 10408.813477
v 1239.697754 17012.058594 11177.046875
v 1192.821045 16965.029297 11766.930664
v 1029.526611 17454.740234 11177.046875
v 937.483398 17454.740234 11766.930664
v 1439.085693 16717.117188 11177.046875
v 1407.834717 16670.087891 11766.930664
v 2425.260742 15941.653320 10781.232422
v 2227.392090 16449.400391 10051.221680
v 2220.371582 16180.833984 10585.627930
v 2991.933594 15951.770508 10243.125977
v 2796.328125 15869.034180 10585.627930
v 2796.328125 16142.006836 10026.811523
v 2598.678223 16028.349609 10387.977539
v 2339.554199 15893.732422 11177.046875
v 2308.149902 15865.001953 11766.930664
v 2044.612549 16080.357422 11177.046875
v 2013.208496 16042.994141 11766.930664
v 2797.862305 15700.573242 11177.046875
v 2797.862305 15633.173828 11766.930664
v 2043.706543 16716.462891 9890.553711
v 718.005371 18315.478516 11996.117188
v 710.372803 18634.507812 11891.887695
v 718.005371 19051.357422 11900.980469
v 1734.036377 18044.623047 9457.136719
v 1702.785156 18634.507812 9425.885742
v 1719.529785 19224.390625 9457.136719
v 1785.749512 19814.273438 9531.322266
v 2878.924316 18044.623047 8356.307617
v 2837.619141 18634.507812 8270.601562
v 2257.718018 18044.623047 8914.112305
v 1962.776367 18044.623047 9162.195312
v 2240.085205 18634.507812 8896.479492
v 1945.143555 18634.507812 9130.944336
v 2583.982422 18044.623047 8619.170898
v 2542.677734 18634.507812 8601.538086
v 2837.619141 19224.390625 8261.745117
v 2868.870117 19814.273438 8308.622070
v 2286.961914 19224.390625 8912.104492
v 1992.020264 19224.390625 9162.195312
v 2335.845703 19814.273438 8960.989258
v 2040.904297 19814.273438 9236.379883
v 2542.677734 19224.390625 8617.163086
v 2573.928711 19814.273438 8666.047852
v 1276.016357 18044.623047 10187.649414
v 1081.470947 18044.623047 10587.164062
v 1244.765381 18634.507812 10140.773438
v 1020.678711 18634.507812 10587.164062
v 1439.094727 18044.623047 9892.708008
v 1407.843750 18634.507812 9845.831055
v 857.645508 18044.623047 11177.046875
v 768.295166 18089.162109 11786.465820
v 812.479004 18634.507812 11177.046875
v 741.623779 18634.507812 11596.946289
v 1249.832764 19224.390625 10172.024414
v 1039.589844 19224.390625 10587.164062
v 1284.690186 19676.343750 10232.924805
v 1167.957031 19849.492188 10539.444336
v 1424.588135 19224.390625 9877.083008
v 1467.646240 19849.492188 10020.690430
v 1340.435791 20069.599609 10311.004883
v 838.161377 19224.390625 11177.046875
v 752.765625 19238.546875 11729.384766
v 914.507080 19814.273438 11177.046875
v 808.692383 19814.273438 11766.930664
v 1858.684082 20257.107422 9616.950195
v 2965.530762 20404.156250 8405.282227
v 3058.216309 20733.685547 8487.985352
v 2401.251953 20404.156250 9026.398438
v 2084.397461 20433.902344 9415.153320
v 2468.328613 20733.697266 9077.856445
v 2360.167969 20955.810547 9445.622070
v 2670.589355 20404.156250 8731.457031
v 2840.748535 20930.318359 8860.395508
v 2623.280762 21126.953125 9274.478516
v 2468.316650 21323.593750 9667.734375
v 3016.536133 21365.238281 9036.189453
v 2821.738281 21541.042969 9450.281250
v 3020.196289 21955.132812 9626.083984
v 1237.915527 20404.156250 10715.930664
v 1298.767578 20763.652344 10838.385742
v 1709.084229 20433.902344 9955.034180
v 1403.919189 20404.156250 10420.989258
v 1806.814697 20888.658203 10123.497070
v 1604.870361 21022.783203 10579.255859
v 1054.990234 20404.156250 11177.046875
v 931.767822 20404.156250 11766.930664
v 1233.982178 20887.902344 11177.046875
v 1194.981201 21047.361328 11731.708984
v 1390.066895 21182.843750 11177.047852
v 1332.599121 21279.537109 11511.600586
v 1796.181641 21436.873047 10713.381836
v 1311.764893 21321.205078 11904.856445
v 1723.780762 21613.669922 11209.804688
v 1513.605957 21544.269531 11731.708984
v 1901.648193 21890.253906 11428.269531
v 1849.076904 21927.353516 11766.931641
v 1940.940186 20650.363281 9730.242188
v 2031.234375 21048.787109 9955.035156
v 1920.106201 21281.912109 10320.126953
v 2347.667725 21545.701172 10035.509766
v 2032.667480 21613.669922 10544.917969
v 2468.328613 21913.464844 10257.624023
v 2352.215088 22013.220703 10587.165039
v 2626.940918 21716.847656 9864.368164
v 2852.992676 22130.925781 10071.416016
v 2707.871094 22308.162109 10587.165039
v 1943.316406 21830.128906 11035.013672
v 2167.158203 22072.240234 11209.804688
v 2260.130127 22253.425781 11806.705078
v 2593.424805 22406.984375 11177.047852
v 2533.193848 22438.480469 11636.591797
v 3679.434570 15386.897461 12058.620117
v 3814.136230 15386.897461 12058.620117
v 3540.148438 16550.783203 9093.313477
v 3361.210449 16392.962891 9349.424805
v 3870.097656 16550.783203 9093.313477
v 4031.086426 16394.505859 9349.424805
v 3623.485352 17140.669922 8503.443359
v 3411.212402 17428.212891 8377.061523
v 3977.628418 17115.478516 8483.895508
v 3977.628418 17454.740234 8238.225586
v 3385.188965 16856.138672 8825.009766
v 3146.893066 16571.607422 9114.148438
v 3230.229492 17213.900391 8556.704102
v 4031.086426 16771.427734 8865.018555
v 4263.353027 16571.607422 9114.148438
v 4567.511719 16436.279297 9472.438477
v 5157.395020 16508.763672 9585.534180
v 4409.167969 17119.833984 8490.133789
v 4590.481934 17396.775391 8294.129883
v 5157.395020 17494.193359 8292.600586
v 4590.481934 16936.894531 8759.548828
v 4567.511719 16616.199219 9177.497070
v 4802.423340 17161.503906 8524.276367
v 5157.395020 16986.134766 8866.938477
v 5157.395020 16691.193359 9290.591797
v 5157.395020 17199.250000 8571.997070
v 3387.745117 15922.013672 10187.326172
v 3387.745117 15728.853516 10587.164062
v 3387.745117 16068.133789 9892.383789
v 3977.628418 15932.571289 10208.594727
v 3977.628418 15758.898438 10587.164062
v 3977.628418 16070.060547 9913.653320
v 3387.745117 15562.472656 11177.046875
v 3444.782227 15462.610352 11823.967773
v 3977.628418 15581.958984 11177.046875
v 3997.509766 15456.050781 11823.967773
v 4293.303711 15965.847656 10271.484375
v 4520.963379 15906.160156 10608.708984
v 4520.963379 16139.615234 10043.826172
v 4686.559082 16030.929688 10426.444336
v 5157.395020 15956.972656 10807.254883
v 5157.395020 16303.858398 9997.280273
v 5157.395020 16070.069336 10512.312500
v 4567.511719 15720.797852 11177.046875
v 4567.511719 15562.472656 11766.930664
v 5157.395020 15826.315430 11177.046875
v 5157.395020 15640.744141 11766.930664
v 7792.943359 15371.224609 10273.295898
v 7684.662109 15276.783203 10587.164062
v 7147.986328 14741.833008 11971.310547
v 7114.929688 15095.208008 11879.894531
v 7742.141602 14792.837891 11464.559570
v 7534.080078 14700.818359 11771.581055
v 7567.248047 15074.859375 11231.578125
v 7324.164062 15095.208008 11584.953125
v 5747.277832 16531.240234 9648.028320
v 6341.750000 16513.974609 9643.416992
v 5747.277832 17556.693359 8350.034180
v 6337.161133 17597.927734 8396.983398
v 5747.277832 17036.146484 8955.615234
v 5747.277832 16741.203125 9353.086914
v 5747.277832 17261.751953 8660.673828
v 6337.161133 17049.988281 8971.241211
v 6341.750000 16718.021484 9407.463867
v 6337.161133 17302.986328 8676.299805
v 7212.181641 16560.115234 9102.651367
v 6980.149414 16423.218750 9424.426758
v 7688.760742 15919.426758 9641.541016
v 7516.927734 16532.439453 9075.120117
v 7502.050781 16205.123047 9429.907227
v 6927.043945 17558.052734 8402.050781
v 7667.938477 17119.833984 8482.608398
v 7489.557617 17414.876953 8364.618164
v 6980.149414 16877.955078 8935.157227
v 6818.925781 16690.060547 9239.153320
v 6927.043945 17263.111328 8603.244141
v 7489.557617 16899.869141 8742.177734
v 7274.683594 17191.673828 8545.106445
v 5747.277832 15927.503906 10774.077148
v 5747.277832 16340.024414 9997.280273
v 5747.277832 16083.759766 10479.135742
v 6469.714844 15924.178711 10215.643555
v 6298.716797 15841.995117 10582.166992
v 6308.947754 16262.931641 9958.991211
v 6076.458984 16049.183594 10382.208008
v 5747.277832 15796.846680 11177.046875
v 5747.277832 15640.897461 11766.930664
v 6337.161133 15703.093750 11177.046875
v 6337.161133 15640.744141 11766.930664
v 6927.043945 15877.071289 10126.839844
v 6927.043945 15673.512695 10587.164062
v 6927.043945 16098.953125 9831.898438
v 7544.224609 15712.387695 10014.166992
v 7389.719727 15509.228516 10587.164062
v 7295.504883 16011.896484 9755.036133
v 6927.043945 15567.698242 11177.046875
v 6990.986328 15521.094727 11789.206055
v 7263.446289 15434.665039 11177.046875
v 7228.988281 15453.534180 11652.874023
v 4710.686035 19336.109375 7311.867676
v 4681.679199 19814.273438 7312.023926
v 5157.395020 19287.658203 7280.772461
v 5157.395020 19814.273438 7199.395508
v 4773.188477 20245.402344 7332.702148
v 5117.524414 20426.880859 7184.139160
v 5433.398438 21249.210938 6733.985840
v 5233.081543 21029.164062 7013.287598
v 5434.694824 22399.021484 6145.398926
v 4845.795410 21809.138672 7316.044434
v 4821.841309 22173.806641 7263.594727
v 5370.212402 21583.923828 6609.269531
v 5041.650391 21601.076172 7090.796387
v 5309.445312 22190.958984 6413.409668
v 4992.012207 22173.806641 6968.653320
v 5979.044922 18922.019531 7335.377930
v 6337.161133 18902.681641 7329.656250
v 6601.463867 20078.576172 6132.401855
v 5768.361328 19207.972656 7226.404785
v 5985.489746 20016.074219 6717.036621
v 5772.228516 19817.376953 6935.870605
v 6601.459961 19509.525391 6743.115234
v 6377.764160 19277.496094 7015.452148
v 6404.834473 19850.697266 6533.448242
v 6208.204590 19622.818359 6814.750488
v 6927.043945 18832.130859 7251.528320
v 7516.927734 18801.033203 7191.033203
v 6927.043945 19978.289062 6000.871582
v 7688.768555 19458.738281 6039.736328
v 7626.282227 19986.121094 5512.359863
v 7460.898438 19779.076172 5811.967285
v 6927.043945 19412.654297 6637.625000
v 6927.043945 19117.712891 6956.586914
v 6927.043945 19683.345703 6342.684082
v 7502.056641 19312.146484 6430.617188
v 7516.927734 19010.853516 6896.091797
v 7295.513672 19572.029297 6215.746582
v 6519.708496 20404.156250 6019.387207
v 6588.058594 21165.886719 5512.563477
v 6454.813477 20979.171875 5830.548340
v 5894.622559 20404.156250 6636.593262
v 5599.681152 20404.156250 6857.109375
v 5722.227051 21029.164062 6565.697754
v 5508.897949 20855.953125 6793.607910
v 6224.767090 20404.156250 6341.651855
v 6148.583496 20994.041016 6238.153320
v 5869.618164 21725.814453 6009.977051
v 5993.333008 22336.533203 5527.937012
v 5734.847656 22171.150391 5881.060547
v 6469.627441 21583.925781 5415.668457
v 6186.838867 21551.083984 5835.249512
v 6292.596191 22153.466797 5377.830566
v 6066.258301 21943.277344 5616.722168
v 5702.705566 21551.082031 6297.715820
v 5476.362793 22005.765625 6187.067383
v 6106.629883 21332.558594 6185.782715
v 7061.097656 20513.513672 5470.895020
v 6889.500000 20351.794922 5700.812988
v 6889.500000 20979.171875 5385.809082
v 6667.842773 20772.632812 5608.886719
v 7464.563477 20351.794922 5385.687012
v 7233.027344 20120.257812 5584.198730
v 7516.927734 20994.042969 5144.705566
v 6927.043945 21583.925781 5175.956543
v 6927.043945 22173.808594 5107.576660
v 7516.927734 21583.925781 5062.482422
v 7516.927734 22173.808594 5031.230957
v 3572.695801 18248.800781 7892.617676
v 3380.739258 18049.154297 8061.589844
v 3477.592285 18634.507812 7841.330566
v 3182.650879 18634.507812 7975.660156
v 3977.628418 18156.541016 7841.330566
v 3977.628418 17861.599609 7981.960938
v 3977.628418 18634.507812 7666.208984
v 3453.109863 19224.390625 7811.276855
v 3158.168457 19224.390625 7966.803223
v 3515.603027 19814.273438 7839.783203
v 3220.661621 19814.273438 8013.680664
v 3977.628418 19224.390625 7568.018066
v 3977.628418 19814.273438 7596.524414
v 4567.511719 18106.533203 7803.314941
v 4567.511719 17811.591797 7966.407227
v 4567.511719 18634.507812 7550.074219
v 5157.395020 18137.783203 7812.171875
v 5157.395020 17842.841797 7997.658203
v 5157.395020 18634.507812 7554.673828
v 4535.439941 19173.445312 7390.590820
v 4386.737305 19814.273438 7394.490234
v 5157.395020 18992.716797 7380.250488
v 3602.542969 20236.285156 7888.957520
v 3398.646973 20421.410156 8091.552734
v 3425.973633 20955.804688 8383.570312
v 3947.882324 20421.410156 7764.166016
v 3731.423828 20629.539062 7960.593262
v 4157.205566 20994.041016 7864.204102
v 3862.263672 20994.041016 8079.818848
v 3254.831543 21126.941406 8642.933594
v 3648.087402 21323.582031 8494.214844
v 4266.641113 21302.748047 7926.761719
v 4034.850098 21509.791016 8263.222656
v 4196.314453 22038.457031 8425.484375
v 3430.625488 21541.037109 8839.561523
v 3213.163574 21758.492188 9232.829102
v 3606.419434 21955.132812 9036.189453
v 3420.205566 22151.759766 9429.453125
v 3803.058594 21716.835938 8642.933594
v 3981.966797 22193.421875 8797.896484
v 3767.619629 22348.388672 9232.823242
v 4572.940918 20426.880859 7442.913086
v 4567.511719 20994.041016 7609.991699
v 4894.316406 20638.658203 7353.536133
v 4897.529785 20994.041016 7383.536133
v 4597.082520 21555.943359 7656.572266
v 4348.369629 21696.001953 8032.228516
v 4640.599121 22173.806641 7637.748535
v 4371.515137 22210.572266 8228.367188
v 4877.358887 21415.882812 7386.383301
v 4285.879395 22431.712891 8559.603516
v 3233.991699 22348.388672 9885.208984
v 5747.277832 18207.287109 7796.551270
v 5747.277832 17912.345703 8055.093262
v 5768.361328 18689.037109 7493.366211
v 6337.161133 18237.341797 7782.710449
v 6337.161133 17942.400391 8102.041992
v 6337.161133 18607.738281 7487.769043
v 5585.790039 19000.400391 7382.002930
v 6927.043945 18257.720703 7845.203613
v 6927.043945 17962.779297 8107.109375
v 6927.043945 18537.189453 7550.262207
v 7516.927734 18243.291016 7859.044434
v 7516.927734 17948.349609 8060.160645
v 7516.927734 18506.091797 7564.103027
v 94.386841 13325.557617 16142.394531
v 22.685669 13325.557617 16485.994141
v 71.686646 13915.441406 16111.143555
v 15.610962 13915.441406 16485.994141
v 438.329346 13325.557617 16124.986328
v 438.329346 13915.441406 16093.735352
v 95.586914 14328.929688 16148.196289
v 82.347290 14517.463867 16451.294922
v 102.937744 15095.207031 16577.966797
v 438.329346 14345.512695 16158.020508
v 438.329346 14640.455078 16244.545898
v 438.329346 15095.207031 16367.769531
v 102.937744 15685.090820 16671.710938
v 116.421143 16038.669922 16749.781250
v 438.329346 15685.090820 16562.484375
v 438.329346 16067.989258 16734.205078
v 774.657227 13325.557617 16173.645508
v 1069.598633 13325.557617 16298.650391
v 784.558105 13915.441406 16173.645508
v 1079.499756 13915.441406 16291.413086
v 1618.095703 13325.557617 16564.771484
v 1675.665527 13968.431641 16613.296875
v 753.229004 14272.008789 16189.865234
v 981.199219 14483.311523 16314.848633
v 1028.212646 15095.207031 16479.802734
v 1570.724121 14505.324219 16617.607422
v 1457.555664 15095.207031 16690.000000
v 1971.993164 13325.557617 16752.115234
v 1952.341309 13807.129883 16760.978516
v 1735.890625 16384.812500 12356.813477
v 1815.881592 16469.052734 12946.697266
v 1879.518066 16533.923828 13322.093750
v 1222.064941 17018.603516 12356.813477
v 1275.257324 17091.068359 12782.988281
v 982.353027 17454.740234 12356.813477
v 1163.535889 17422.488281 12966.448242
v 1440.948975 16723.662109 12356.813477
v 1495.616455 16882.607422 12966.448242
v 1346.876953 17204.359375 13176.243164
v 1268.932617 17622.175781 13536.580078
v 1319.601807 17731.740234 13849.463867
v 1728.416016 16838.078125 13525.865234
v 1811.759277 17016.853516 13995.301758
v 1412.458252 17327.234375 13536.580078
v 1628.176758 17472.611328 14119.010742
v 2355.026611 15879.888672 12356.813477
v 2431.210449 15923.939453 12946.697266
v 2060.085205 16089.871094 12356.813477
v 2136.268799 16174.110352 12946.697266
v 2797.862305 15624.866211 12356.813477
v 2797.862305 15684.384766 12946.697266
v 2484.966797 15962.080078 13301.260742
v 2225.842529 16291.062500 13508.304688
v 2359.974121 16441.455078 14016.148438
v 2783.583008 15827.611328 13513.364258
v 2994.604004 15908.323242 14126.462891
v 2577.436035 16048.200195 13694.515625
v 2667.514648 16256.886719 14178.250977
v 1966.718750 16623.597656 13715.350586
v 2152.929443 16799.384766 14202.353516
v 1945.884766 17213.480469 14388.556641
v 2514.921875 16581.917969 14409.403320
v 1020.248535 15664.625977 16676.994141
v 818.311523 16038.669922 16749.781250
v 1366.526367 15454.355469 16753.333984
v 1837.849609 17606.736328 14501.945312
v 3083.982910 15971.211914 14451.059570
v 2933.941406 16278.676758 14675.151367
v 3021.480469 16477.771484 15103.445312
v 2339.140137 16975.173828 14606.018555
v 2173.715576 17389.275391 14750.609375
v 2401.546387 17565.068359 15091.840820
v 2592.511719 16813.070312 14768.125977
v 2896.451660 16868.556641 15302.536133
v 2514.933594 17171.812500 14999.275391
v 2622.226562 17402.960938 15295.572266
v 3021.488281 17067.650391 15681.710938
v 2937.984863 17454.740234 15800.037109
v 15.610962 13325.557617 17075.876953
v 15.610962 13325.557617 17665.761719
v 46.862183 13915.441406 17075.876953
v 31.236572 13915.441406 17665.761719
v -0.014526 13325.557617 18255.644531
v -0.014526 13325.557617 18845.527344
v -0.014526 13915.441406 18255.644531
v -0.014526 13915.441406 18845.527344
v 46.862183 14505.324219 17075.876953
v 15.610962 14505.324219 17665.761719
v 31.236572 15095.207031 17075.876953
v -0.014526 15095.207031 17665.761719
v -0.014526 14505.324219 18255.644531
v -0.014526 14505.324219 18845.527344
v -0.014526 15095.207031 18255.644531
v -0.014526 15095.207031 18845.527344
v 31.236572 13325.557617 19435.410156
v 62.487671 13325.557617 20025.294922
v 31.236572 13915.441406 19435.410156
v 54.827881 13915.441406 20025.294922
v 62.487671 13325.557617 20615.177734
v 62.487671 13325.556641 21205.060547
v 54.827881 13915.441406 20615.177734
v 46.862183 13915.440430 21205.060547
v 15.610962 14505.324219 19435.410156
v 23.576782 14505.324219 20025.294922
v -0.014526 15095.207031 19435.410156
v -0.014526 15095.207031 20025.294922
v 23.576782 14505.324219 20615.177734
v 15.610962 14505.323242 21205.060547
v -0.014526 15095.207031 20615.177734
v -0.014526 15095.206055 21205.060547
v 31.236572 15685.090820 17075.876953
v -0.014526 15685.090820 17665.761719
v 69.846802 16251.168945 17083.509766
v -0.014526 16274.973633 17665.761719
v 438.329346 16362.930664 16934.599609
v -0.014526 15685.090820 18255.644531
v -0.014526 15685.090820 18845.527344
v -0.014526 16274.973633 18255.644531
v -0.014526 16274.973633 18845.527344
v 95.586914 16655.509766 17285.226562
v 57.346313 16857.224609 17685.888672
v 95.586914 17224.570312 17895.931641
v 438.329346 16729.132812 17229.541016
v 438.329346 17024.076172 17510.707031
v 483.456299 17434.615234 17832.013672
v -0.014526 16864.855469 18255.644531
v -0.014526 16864.855469 18845.527344
v 69.846802 17434.613281 18275.777344
v 15.610962 17454.738281 18845.527344
v 316.913330 17617.824219 18092.572266
v -0.014526 15685.090820 19435.410156
v -0.014526 15685.090820 20025.294922
v -0.014526 16274.973633 19435.410156
v -0.014526 16274.973633 20025.294922
v -0.014526 15685.090820 20615.177734
v -0.014526 15685.089844 21205.060547
v -0.014526 16274.973633 20615.177734
v -0.014526 16274.972656 21205.060547
v -0.014526 16864.855469 19435.410156
v -0.014526 16864.855469 20025.294922
v -0.014526 17454.738281 19435.410156
v -0.014526 17454.738281 20025.294922
v -0.014526 16864.855469 20615.177734
v -0.014526 16864.855469 21205.060547
v -0.014526 17454.738281 20615.177734
v -0.014526 17454.738281 21205.060547
v 1910.673096 14200.385742 16783.300781
v 1865.665527 14505.324219 16815.734375
v 1752.497314 15095.207031 16897.650391
v 2266.934814 13325.557617 16984.951172
v 2172.572998 13968.431641 16958.658203
v 2624.360840 13325.557617 17279.892578
v 2919.302246 13325.557617 17505.474609
v 2608.735352 13915.441406 17296.255859
v 2903.676758 13915.441406 17497.894531
v 2207.979004 14505.324219 17067.363281
v 2240.547852 15049.734375 17217.162109
v 2458.888184 15216.047852 17393.044922
v 2561.858398 14505.324219 17327.507812
v 2856.799805 14505.324219 17505.474609
v 2521.378418 14822.791992 17352.361328
v 2749.948730 15049.734375 17522.941406
v 1211.566895 15847.610352 16850.855469
v 1020.248535 16251.168945 16989.130859
v 1585.130859 15664.625977 16991.263672
v 1567.150635 16261.529297 17270.197266
v 1729.814941 16449.197266 17413.880859
v 1028.212646 16674.994141 17283.681641
v 1028.212646 16969.935547 17499.681641
v 1039.769775 17491.298828 17823.193359
v 1336.559570 16583.322266 17357.414062
v 1567.150635 16813.912109 17569.853516
v 1618.095703 17307.583984 17882.259766
v 1244.102295 17712.298828 17977.251953
v 1618.095703 17602.523438 18054.878906
v 2068.789062 15685.090820 17286.345703
v 2363.730469 15685.090820 17451.025391
v 1968.110840 16055.940430 17343.228516
v 2182.034668 16261.529297 17550.400391
v 2842.931152 15721.648438 17752.833984
v 2653.685547 16274.973633 17857.939453
v 3069.605469 15942.648438 17977.251953
v 2948.627441 16274.973633 18070.505859
v 2176.562256 16833.433594 17838.427734
v 1958.989990 17197.603516 17935.583984
v 2530.511230 16615.857422 17935.595703
v 2352.245361 17009.109375 18069.720703
v 2197.284668 17439.964844 18266.349609
v 2435.579346 17682.330078 18617.935547
v 2767.569824 16843.738281 18276.767578
v 3004.628418 17071.621094 18617.923828
v 2611.373047 17289.074219 18462.976562
v 2818.413086 17485.703125 18814.558594
v 3025.453125 17682.332031 19207.820312
v 718.005371 18315.478516 12190.536133
v 710.372803 18634.507812 12294.970703
v 718.005371 19051.357422 12244.004883
v 780.795654 18089.162109 12375.024414
v 917.753418 18044.623047 12946.697266
v 741.623779 18634.507812 12589.912109
v 826.016357 18634.507812 12946.697266
v 1120.885986 18044.623047 13536.580078
v 1270.948975 18044.623047 13936.633789
v 1002.658936 18634.507812 13536.580078
v 1213.208252 18634.507812 14030.459961
v 1470.039795 18044.623047 14231.576172
v 1419.139893 18634.507812 14325.401367
v 743.294434 19238.546875 12407.105469
v 812.479004 19224.390625 12946.697266
v 796.853271 19814.273438 12356.813477
v 859.355713 19814.273438 12946.697266
v 978.257568 19224.390625 13536.580078
v 1202.343994 19224.390625 14046.084961
v 1009.508789 19814.273438 13536.580078
v 1217.969727 19814.273438 14014.833984
v 1387.890869 19224.390625 14341.026367
v 1391.914307 19814.273438 14309.775391
v 1764.981445 18044.623047 14595.860352
v 1748.522461 18664.750000 14748.598633
v 1904.120605 18881.541016 15020.204102
v 1669.457275 19224.390625 14716.346680
v 1899.662109 19224.390625 15024.663086
v 1726.741943 19769.263672 14743.183594
v 1904.120605 19542.626953 15020.204102
v 2009.041016 18044.623047 14890.801758
v 2303.982666 18044.623047 15163.367188
v 1945.788574 18488.283203 14966.727539
v 2168.641357 18664.750000 15175.802734
v 2573.619141 18044.623047 15458.308594
v 2542.368164 18634.507812 15505.185547
v 2883.058594 18005.345703 15947.892578
v 3042.218750 18175.785156 16241.639648
v 2745.806641 18634.507812 15896.112305
v 3001.300293 18634.507812 16282.557617
v 2207.979004 19224.390625 15270.496094
v 2008.290771 19935.880859 14957.702148
v 2206.142822 19769.263672 15191.457031
v 2526.742676 19224.390625 15552.062500
v 2526.742676 19814.273438 15524.753906
v 2694.093750 19224.390625 15896.112305
v 2965.212891 19224.390625 16313.808594
v 2678.467773 19814.273438 15896.112305
v 2949.587402 19814.273438 16329.434570
v 921.857910 20404.156250 12356.813477
v 987.267578 20404.156250 12946.697266
v 1150.363770 20994.041016 12356.814453
v 1219.082031 20997.359375 12901.686523
v 1392.304932 21196.201172 13068.305664
v 1172.889404 20446.640625 13566.564453
v 1263.447998 20278.335938 13932.895508
v 1260.975830 20802.945312 13389.924805
v 1340.435791 20671.591797 13783.180664
v 1429.249512 20446.640625 14128.299805
v 1446.984863 20997.359375 13566.565430
v 1701.811523 21045.230469 14175.983398
v 1311.947998 21321.691406 12356.814453
v 1319.601807 21300.371094 12675.050781
v 1522.884277 21616.632812 12356.814453
v 1626.142578 21586.287109 12955.014648
v 1817.825684 21964.714844 12356.814453
v 1859.980225 21940.070312 12841.723633
v 1759.923096 21509.341797 13536.581055
v 1836.361816 21392.828125 14012.369141
v 1928.819092 21275.984375 14405.624023
v 1919.697998 21872.205078 13234.978516
v 2190.886230 22259.656250 12356.814453
v 2205.611816 22188.783203 12965.434570
v 2572.077637 22437.496094 13089.146484
v 2050.112061 21804.283203 13536.581055
v 2205.608643 21607.121094 14136.077148
v 2345.053711 22017.550781 13536.581055
v 2482.398438 21898.402344 13866.530273
v 2560.370117 21821.416016 14259.785156
v 2671.246582 22312.492188 13536.581055
v 2805.912109 22175.683594 14125.657227
v 1737.753662 20404.156250 14620.342773
v 1817.015625 20882.728516 14543.613281
v 2206.142822 20459.148438 14932.814453
v 2401.546387 20299.183594 15117.930664
v 2158.459717 21045.230469 14689.841797
v 2505.705078 20692.437500 15008.502930
v 2540.911621 20459.148438 15311.227539
v 2535.521973 20994.041016 14960.235352
v 2647.219727 20994.041016 15306.230469
v 2754.666992 20404.156250 15896.112305
v 3004.208008 20404.156250 16282.557617
v 2930.684082 20975.576172 15915.152344
v 3066.929199 20766.640625 16220.805664
v 2322.074463 21428.160156 14552.747070
v 2648.713379 21608.441406 14736.164062
v 2915.144531 21615.458984 15337.769531
v 2949.590332 22080.781250 14716.347656
v 3041.030273 21967.242188 15162.167969
v 3004.422363 21439.853516 15731.216797
v 710.168701 17757.517578 17952.962891
v 116.421143 17776.742188 18485.828125
v 84.665894 18001.871094 18878.156250
v 120.285400 18404.328125 19096.535156
v 492.702148 17963.757812 18299.611328
v 275.235352 18170.000000 18703.279297
v 668.490723 18383.509766 18506.652344
v 461.450928 18590.546875 18897.123047
v 647.666260 18978.953125 19090.966797
v 18.509277 18044.621094 19435.412109
v -0.014526 18044.621094 20025.296875
v 74.484131 18614.375000 19444.650391
v 2.883667 18634.505859 20025.296875
v 254.411011 18797.583984 19254.183594
v -0.014526 18044.621094 20615.179688
v -0.014526 18044.621094 21205.062500
v -0.014526 18634.505859 20615.179688
v -0.014526 18634.505859 21205.062500
v 99.451416 19015.050781 19647.437500
v 72.165527 19216.761719 20032.923828
v 116.421143 19604.921875 20234.634766
v 451.034668 19193.628906 19470.294922
v 254.402710 19408.308594 19841.380859
v 475.787109 19833.222656 19452.964844
v 471.868652 19780.722656 20076.890625
v 15.610962 19224.388672 20615.179688
v -0.014526 19224.388672 21205.062500
v 91.693848 19806.638672 20647.804688
v 27.294189 19814.271484 21205.062500
v 296.079102 19998.177734 20472.929688
v 134.032959 20383.324219 19391.812500
v 130.714600 20640.886719 19788.572266
v 113.657837 20994.039062 19521.974609
v 103.423828 20941.544922 20001.238281
v 314.333008 20383.324219 19391.812500
v 400.777588 20994.039062 19521.974609
v 463.645264 20903.941406 20049.814453
v 131.998779 20132.314453 20866.183594
v 98.995361 20213.208984 21205.062500
v 102.937744 21072.777344 20615.179688
v 116.421143 21186.513672 21063.375000
v 421.773682 20288.126953 20593.210938
v 452.982910 20506.519531 21232.214844
v 385.836182 20888.259766 20556.191406
v 116.421143 21365.439453 19618.767578
v 102.937744 21452.480469 20025.296875
v 305.212158 21365.439453 19618.767578
v 448.470459 21545.949219 20073.949219
v 94.847778 21609.859375 20601.738281
v 94.847778 21550.957031 21238.027344
v 116.421143 21967.035156 20789.404297
v 102.937744 22073.625000 21205.062500
v 412.392456 21787.419922 20436.667969
v 392.864014 21328.865234 21422.617188
v 412.392456 21966.359375 20672.621094
v 394.415771 22289.808594 21264.050781
v 850.846680 17757.517578 17952.962891
v 1039.769775 17990.335938 18150.523438
v 1028.212646 18422.615234 18480.507812
v 1028.212646 18717.556641 18755.646484
v 1636.679443 18063.207031 18360.273438
v 1845.696289 18272.222656 18584.408203
v 1452.440918 18406.351562 18501.082031
v 1669.897949 18661.400391 18827.269531
v 1028.212646 19019.330078 19050.587891
v 1494.099365 18999.785156 19070.132812
v 2042.323975 17878.964844 18462.976562
v 2261.713135 18096.423828 18797.800781
v 2087.846924 18523.195312 18977.664062
v 2632.197266 17920.625000 19011.193359
v 1887.354736 18916.449219 19153.468750
v 1028.212646 19314.271484 19367.982422
v 1028.212646 19578.691406 19662.923828
v 1028.212646 19873.632812 20013.541016
v 1669.896973 19236.304688 19418.931641
v 1845.694824 19472.826172 19776.861328
v 1452.439453 19554.542969 19684.392578
v 1596.981689 19787.785156 20044.630859
v 1741.523682 20021.027344 20470.912109
v 2481.102539 18313.880859 19186.988281
v 2272.131592 18682.228516 19366.855469
v 2456.416016 18841.261719 19860.207031
v 2828.831055 18106.841797 19394.033203
v 3025.464844 18293.058594 19797.693359
v 2632.209473 18448.007812 19580.242188
v 2787.163086 18637.980469 20025.578125
v 2942.116699 18827.953125 20491.746094
v 2063.160400 19079.570312 19546.722656
v 2248.079102 19224.105469 20015.162109
v 2039.742188 19627.773438 20170.117188
v 2548.861328 18975.386719 20253.462891
v 2432.997803 19368.642578 20491.750000
v 2190.137207 19782.732422 20677.958984
v 2368.708008 19968.152344 21205.062500
v 2735.076172 19151.187500 20688.375000
v 2921.290527 19326.986328 21102.466797
v 2528.035156 19544.437500 20885.003906
v 2753.942871 19645.000000 21261.482422
v 1028.212646 20119.033203 20308.482422
v 759.673828 21166.244141 20220.916016
v 1348.268066 20114.470703 20312.400391
v 1028.212646 20307.583984 20615.179688
v 1028.212646 20592.705078 21123.964844
v 772.875000 21151.751953 20615.179688
v 1574.175781 20205.595703 20646.595703
v 1617.145264 20533.933594 21231.005859
v 1419.883789 20716.054688 21444.931641
v 759.673828 21388.291016 20220.916016
v 774.545410 21584.519531 20627.074219
v 787.046143 21538.794922 21212.687500
v 749.256592 21936.517578 20831.632812
v 780.687744 22050.312500 21205.062500
v 1947.276855 20143.453125 20864.167969
v 2073.766357 20254.316406 21205.062500
v 3568.285645 15368.295898 12356.813477
v 3490.013672 15351.320312 12946.697266
v 3997.509766 15357.134766 12311.931641
v 3977.628418 15296.864258 12946.697266
v 3575.072266 15364.263672 13414.540039
v 3932.875977 15330.347656 13581.332031
v 4099.668945 15363.087891 13962.754883
v 4567.511719 15366.945312 12492.682617
v 4567.511719 15296.864258 12946.697266
v 4922.279297 15385.096680 12612.775391
v 5134.301758 15343.554688 12916.820312
v 4567.511719 15233.480469 13536.580078
v 4547.752930 15236.069336 14146.214844
v 5347.289551 14742.241211 14342.543945
v 5157.395020 15218.736328 13536.580078
v 5153.354980 14975.820312 14138.133789
v 4849.863770 14787.676758 15409.018555
v 4685.234375 15140.023438 14716.346680
v 4731.875488 15038.904297 15249.926758
v 5229.437988 14677.962891 14716.345703
v 5101.092285 14654.156250 15249.925781
v 4934.496582 14845.082031 14716.345703
v 4866.929688 14804.742188 15015.763672
v 4849.863770 14787.676758 15725.863281
v 4734.907227 15041.878906 15911.939453
v 4728.087891 15183.460938 16485.994141
v 5104.066406 14641.655273 15911.938477
v 5256.521973 14642.689453 16485.994141
v 4871.886230 14809.698242 16119.118164
v 4961.580078 14888.519531 16485.994141
v 3273.343750 15430.069336 12356.813477
v 3195.071777 15445.537109 12946.697266
v 4207.391602 15405.931641 12085.382812
v 3382.164551 15493.923828 13581.332031
v 3387.745117 15683.920898 14126.462891
v 3706.413086 15405.931641 13807.794922
v 3932.875977 15456.050781 14146.214844
v 4567.511719 15445.064453 12197.740234
v 5134.301758 15468.666992 12392.414062
v 5315.534668 15405.931641 12700.275391
v 4337.952637 15405.931641 14356.009766
v 3403.939453 15873.433594 14675.151367
v 3611.363770 15929.542969 15082.611328
v 3218.107910 16084.515625 14844.315430
v 3404.319824 16281.139648 15289.655273
v 3977.628418 15631.824219 14716.346680
v 3977.628418 15856.224609 15203.241211
v 3977.628418 16067.406250 15498.182617
v 3590.531250 16477.767578 15693.328125
v 4061.114746 16255.305664 15857.823242
v 4242.915039 16414.080078 16345.702148
v 3197.275391 16674.394531 15496.701172
v 3414.736816 16881.435547 15884.147461
v 3632.198242 17088.476562 16241.543945
v 3211.417480 17454.740234 16094.978516
v 3506.359375 17454.740234 16351.828125
v 3849.659668 16695.220703 16086.583984
v 4046.935547 16860.603516 16490.248047
v 3817.898438 17454.740234 16646.769531
v 4390.292969 15463.516602 14716.346680
v 4392.711426 15675.327148 15358.009766
v 4284.590820 15992.052734 15589.158203
v 4407.715332 15744.079102 15853.859375
v 4489.335938 15685.090820 16485.994141
v 4291.754883 16011.719727 15853.859375
v 4330.207031 16240.460938 16519.794922
v 4293.711426 16632.730469 16738.955078
v 5951.658691 15385.096680 12631.023438
v 5765.939941 15405.931641 12894.917969
v 6054.028809 15385.096680 12631.023438
v 6054.028809 15385.096680 12696.303711
v 5747.277832 14716.945312 14301.763672
v 5668.564941 15320.069336 13536.580078
v 5784.541992 15113.663086 14005.455078
v 6122.879395 14747.197266 14340.743164
v 6326.568848 15141.883789 14276.411133
v 7809.804688 14208.319336 14419.338867
v 7064.110352 14681.374023 12356.812500
v 7085.484375 14700.176758 12767.830078
v 6951.914062 15095.208008 12356.813477
v 7058.970703 15095.208008 12747.741211
v 7516.927734 14553.551758 12356.812500
v 7526.036133 14662.826172 12957.352539
v 7341.565430 15095.208008 13042.682617
v 7219.921875 14798.202148 14419.338867
v 7210.489258 15367.251953 13808.623047
v 7018.577148 15171.811523 14213.484375
v 7671.544922 14681.374023 13536.579102
v 7562.226562 14552.561523 14222.711914
v 7373.246094 15140.458008 13581.830078
v 7314.647461 14973.996094 14026.083984
v 5937.172852 14071.605469 15462.399414
v 6555.816406 13611.472656 15592.143555
v 6350.377930 13891.163086 15414.102539
v 5987.962891 13580.332031 16073.105469
v 5960.834473 13549.689453 16485.994141
v 5863.188477 13891.163086 15884.332031
v 5752.211426 13915.441406 16485.994141
v 6350.377930 13529.380859 15884.332031
v 6337.161133 13348.807617 16485.994141
v 6162.561035 13678.349609 15679.850586
v 5747.277832 14531.841797 14716.345703
v 5743.238281 14340.701172 15281.955078
v 6326.568848 14584.979492 14711.996094
v 6337.161133 14276.017578 15079.163086
v 6516.135254 14976.373047 14512.469727
v 5564.181641 14316.502930 15896.111328
v 5538.655273 14347.748047 16485.994141
v 6641.134766 13611.472656 15592.143555
v 6873.474609 13931.508789 15447.549805
v 7726.622070 14153.560547 14716.345703
v 7508.956055 14023.543945 15315.402344
v 6873.474609 13503.666992 15899.675781
v 6927.043945 13241.354492 16485.994141
v 7034.389648 13745.592773 15705.423828
v 7516.927734 13480.336914 16012.619141
v 7516.927734 13248.347656 16485.994141
v 7516.927734 13737.166992 15717.677734
v 6984.793945 14631.424805 14711.996094
v 6927.043945 14295.819336 15120.971680
v 6826.666016 14976.373047 14512.469727
v 7431.679688 14417.260742 14716.345703
v 7307.014648 14291.655273 15124.890625
v 5751.929688 15468.788086 12403.363281
v 6285.258789 15493.666992 12403.363281
v 6285.258789 15456.050781 12914.437500
v 5963.506836 15439.999023 13536.580078
v 6006.011719 15440.834961 13887.674805
v 6337.161133 15573.032227 13536.580078
v 6337.161133 15518.118164 14005.715820
v 6896.276367 15500.321289 12297.825195
v 6937.521484 15475.819336 12894.851562
v 7267.929688 15438.879883 13056.916016
v 6979.134766 15525.813477 13581.830078
v 6817.233398 15510.089844 14007.627930
v 7267.929688 15438.879883 13415.368164
v 3323.623047 13325.557617 17800.416016
v 3339.248535 13915.441406 17792.835938
v 3618.564453 13325.557617 18024.826172
v 3634.189941 13915.441406 18009.201172
v 3944.771973 13325.557617 18319.767578
v 4239.713379 13325.557617 18583.439453
v 3944.771973 13915.441406 18304.142578
v 4239.713379 13915.441406 18583.439453
v 3323.623047 14505.324219 17800.416016
v 3261.129395 15095.207031 17839.244141
v 3618.564453 14505.324219 18024.826172
v 3556.071289 15095.207031 18087.326172
v 3897.895020 14505.324219 18319.767578
v 4192.836914 14505.324219 18658.515625
v 3819.767090 15095.207031 18382.269531
v 4141.831055 15137.245117 18853.490234
v 4487.763672 13325.557617 18878.380859
v 4468.267578 13915.441406 18878.380859
v 4783.292969 15301.759766 16938.164062
v 5377.574707 14689.556641 17075.876953
v 5426.545898 14736.875977 17560.595703
v 5050.572266 15101.162109 17111.226562
v 5292.004883 15052.831055 17720.638672
v 4408.816895 14505.324219 18953.457031
v 4336.764648 14968.642578 19055.427734
v 5396.260742 15237.337891 18255.644531
v 5442.327637 15355.343750 18606.224609
v 4265.153320 15361.898438 19147.886719
v 4782.705078 13325.557617 19251.468750
v 4763.209473 13915.441406 19288.443359
v 4973.191406 13325.557617 19546.410156
v 5248.942871 13325.557617 20025.294922
v 4946.845703 13915.441406 19583.384766
v 5185.630859 13915.441406 20025.294922
v 5433.146484 13325.557617 20355.050781
v 5387.359863 13916.874023 20582.615234
v 5418.917969 14114.456055 21098.501953
v 4734.079102 14552.833984 19450.400391
v 4860.088867 14781.135742 19732.716797
v 4491.169434 15137.245117 19380.873047
v 4792.615234 15095.207031 19831.441406
v 4908.297852 14387.880859 19657.023438
v 5029.445312 14552.833984 19967.724609
v 4944.991699 15095.207031 20126.382812
v 5240.476562 14505.324219 20615.177734
v 5341.289551 14451.282227 21259.101562
v 5060.635254 15095.207031 20615.177734
v 5128.042969 15095.206055 21205.060547
v 3173.775879 15549.392578 17900.564453
v 3419.955566 15746.018555 18223.439453
v 3666.134766 15942.645508 18567.134766
v 3279.812012 16274.973633 18365.447266
v 3574.753906 16274.973633 18660.388672
v 3742.822266 15549.390625 18469.626953
v 3902.840332 15721.646484 18796.470703
v 3803.316895 16274.973633 18955.330078
v 4244.210938 17025.986328 16873.082031
v 4112.839844 17454.740234 16988.578125
v 3162.072266 16678.367188 18483.810547
v 3388.704590 16874.990234 18845.810547
v 3222.081055 17289.078125 19011.179688
v 3725.951660 16678.357422 19073.695312
v 4669.963379 15638.076172 17111.226562
v 4785.756348 15845.829102 17665.761719
v 4458.975586 16274.973633 17075.876953
v 4604.514160 16274.973633 17665.761719
v 4882.411133 15410.107422 17331.419922
v 4976.323730 15550.886719 17665.761719
v 4860.185059 15977.763672 17962.970703
v 4766.100098 16307.605469 18198.017578
v 4824.961914 16525.986328 18594.521484
v 5118.554199 15742.717773 18198.017578
v 5377.888184 15673.187500 18819.921875
v 4970.799805 16132.733398 18356.226562
v 5107.472656 16307.605469 18812.900391
v 4376.214355 16843.558594 17072.177734
v 4531.220215 16864.857422 17665.761719
v 4338.357910 17454.740234 17283.519531
v 4499.005859 17454.740234 17665.761719
v 4622.001465 16864.855469 18255.644531
v 4788.723633 16922.484375 18812.900391
v 4590.822266 17454.738281 18255.644531
v 4679.670410 17454.738281 18845.527344
v 4991.634277 16764.273438 18987.779297
v 4207.718750 15685.090820 19252.187500
v 4110.690430 16274.038086 19461.347656
v 4235.186523 16470.039062 19788.570312
v 3615.335938 17071.613281 19207.820312
v 3429.125488 17496.121094 19404.447266
v 3636.170410 17703.164062 19757.630859
v 3867.651855 16870.933594 19416.832031
v 4176.386230 16864.855469 19862.693359
v 3788.453613 17309.910156 19601.076172
v 4028.039551 17516.953125 19999.736328
v 4267.625977 17723.998047 20325.179688
v 4377.574707 15685.090820 19547.130859
v 4675.507812 15664.619141 20045.757812
v 4306.701660 16076.786133 19675.267578
v 4434.010254 16274.038086 20001.236328
v 5426.545898 15861.880859 19300.277344
v 4884.991699 15454.343750 20256.029297
v 5382.408203 16274.973633 19398.929688
v 4806.215820 15857.575195 20615.177734
v 4845.795410 15949.188477 21075.087891
v 4687.475586 16274.973633 20615.177734
v 4817.463379 16234.979492 21230.046875
v 5125.562988 15806.002930 21153.490234
v 5398.034180 16274.973633 20779.453125
v 4860.185059 17157.529297 19142.738281
v 4379.500977 16864.855469 20157.634766
v 4817.007812 17454.738281 19260.091797
v 4318.510742 17330.742188 20241.843750
v 5216.236328 16950.484375 19430.634766
v 5440.839355 17136.695312 19741.849609
v 5030.779297 17454.738281 19555.033203
v 5325.720703 17454.738281 19872.531250
v 4555.783691 16864.855469 20615.177734
v 4743.794434 16864.855469 21118.228516
v 4378.658203 17498.318359 20559.156250
v 4665.666504 17454.738281 21030.667969
v 5384.889648 16745.816406 20835.902344
v 5137.418945 16854.492188 21157.535156
v 5200.966309 17485.810547 21254.947266
v 5976.459961 13553.712891 17075.876953
v 6008.796875 13585.696289 17551.462891
v 5767.837402 13915.441406 17075.876953
v 5867.768066 13861.399414 17715.158203
v 6337.161133 13290.328125 17075.876953
v 6283.119629 13399.984375 17715.158203
v 6050.464844 13628.744141 17944.716797
v 5903.027832 13990.310547 18255.644531
v 5991.056641 14130.940430 18845.527344
v 6412.031250 13459.957031 18255.644531
v 6527.056152 13553.158203 18701.273438
v 6117.089844 13695.369141 18255.644531
v 6333.121582 13806.292969 18876.951172
v 5538.655273 14394.615234 17075.876953
v 5538.003418 14526.278320 17720.638672
v 5459.188965 14827.952148 17953.849609
v 5656.385254 14505.324219 18255.644531
v 5813.685059 14505.324219 18845.527344
v 5500.635254 14942.396484 18255.644531
v 5568.419434 15133.311523 18819.921875
v 6885.503906 13081.042969 17067.072266
v 6744.029297 13076.016602 17665.761719
v 7516.927734 13093.568359 16968.892578
v 6940.149414 13160.233398 18242.539062
v 6895.620117 13443.812500 18876.951172
v 6678.043945 13642.821289 19094.529297
v 7383.808594 13067.445312 18430.429688
v 7555.032227 13164.878906 18807.419922
v 6041.343750 14209.505859 19157.017578
v 6302.648438 14045.341797 19386.351562
v 6445.220215 14098.492188 20025.294922
v 5557.341309 13325.557617 20649.992188
v 5722.904785 13325.556641 21205.060547
v 5502.250488 13721.201172 20757.535156
v 5535.152832 13916.873047 21259.101562
v 6538.761719 14161.081055 20452.656250
v 5939.738770 14483.311523 19386.351562
v 5961.652344 14644.630859 20025.294922
v 5690.527344 15095.207031 19435.410156
v 5753.029785 15095.207031 20025.294922
v 6083.011719 14272.008789 19550.275391
v 6150.278809 14349.689453 20025.294922
v 6008.529297 14738.375977 20615.177734
v 5811.742676 15095.207031 20615.177734
v 5916.286133 15080.213867 21170.050781
v 6340.145020 14411.772461 20635.642578
v 6322.168945 14631.176758 21170.050781
v 6115.547363 14873.591797 21343.337891
v 7071.299805 13553.160156 19291.144531
v 6895.620117 13694.507812 19466.828125
v 6927.043945 13861.759766 20025.294922
v 7473.010742 13447.610352 19466.828125
v 7640.361328 13538.663086 19901.873047
v 7247.105469 13624.784180 19684.400391
v 7473.010742 13667.958984 20069.218750
v 6919.080078 14070.342773 20635.642578
v 7110.399414 14149.583984 21021.707031
v 7516.927734 13779.599609 20615.177734
v 7526.036133 13964.858398 21213.023438
v 6717.143555 14235.296875 20845.912109
v 6919.080078 14321.776367 21213.023438
v 7335.481445 14274.588867 21414.960938
v 5489.048340 15468.624023 18999.478516
v 5518.417480 15673.187500 19472.308594
v 5578.097168 15685.090820 20025.294922
v 5473.110352 16274.973633 19693.871094
v 5574.982910 16274.973633 20025.294922
v 5552.887207 15720.092773 20614.162109
v 5581.877441 15720.091797 21200.531250
v 5554.208496 16274.973633 20484.511719
v 5474.862793 16023.391602 21394.138672
v 5464.157227 16743.439453 19718.531250
v 5629.978027 16909.984375 19973.203125
v 5605.099609 17454.738281 20167.472656
v 5783.995605 16952.806641 20583.818359
v 5634.778320 17139.072266 20930.843750
v 5940.341309 17356.480469 20601.226562
v 5797.754883 17305.460938 21158.507812
v 6258.547363 17357.722656 20745.714844
v 6262.885742 17452.845703 21146.072266
v 3104.816895 17782.529297 16179.041016
v 3389.293457 17999.992188 16494.914062
v 3374.370117 18634.507812 16577.500000
v 3694.700195 17824.197266 16748.185547
v 3358.744629 19224.390625 16608.750000
v 3327.493164 19814.273438 16624.376953
v 3108.591309 22452.966797 14384.784180
v 3346.025879 20404.156250 16577.500000
v 3146.388672 21159.896484 16124.472656
v 3412.018066 20932.017578 16484.496094
v 3728.435547 21097.394531 16748.187500
v 3117.725586 21833.109375 15555.423828
v 3159.567871 22375.724609 14716.347656
v 3245.628906 22167.843750 15337.769531
v 3235.332031 21615.458984 15915.153320
v 3547.214355 21583.923828 16342.153320
v 3533.067871 22149.871094 15884.675781
v 3645.099121 21937.287109 16228.643555
v 3820.661621 21583.923828 16637.093750
v 3758.396484 22330.542969 16073.677734
v 3986.278320 22144.324219 16461.726562
v 4369.113770 22351.363281 16694.812500
v 3673.770020 18217.455078 16789.855469
v 3669.311523 18634.507812 16794.312500
v 3973.271973 17999.992188 17074.378906
v 4251.843750 18175.785156 17442.230469
v 3955.396484 18634.507812 17089.255859
v 4250.337891 18634.507812 17509.183594
v 3653.686035 19224.390625 16809.939453
v 3622.435059 19814.273438 16825.566406
v 3949.671875 19224.390625 17104.880859
v 4244.613281 19224.390625 17477.941406
v 4019.601562 19819.263672 17150.917969
v 4244.210938 19625.962891 17400.574219
v 4284.487305 17782.529297 17358.902344
v 4382.467773 18005.345703 17649.619141
v 4369.680664 18634.507812 17804.125000
v 4545.954590 18044.621094 18255.646484
v 4609.347656 18044.621094 18845.529297
v 4499.005859 18634.505859 18255.646484
v 4578.096680 18634.505859 18845.529297
v 4345.198242 19224.390625 17772.882812
v 4285.879395 20019.218750 17338.070312
v 4390.150391 19819.263672 17624.625000
v 4458.897949 19224.388672 18255.646484
v 4562.471191 19224.388672 18845.529297
v 4538.888672 19814.271484 18255.646484
v 4578.096680 19814.271484 18845.529297
v 3242.914551 17899.804688 19601.076172
v 3460.376465 18117.259766 19974.291016
v 3284.583008 18434.699219 20190.949219
v 3874.370117 17941.460938 20150.886719
v 3677.838379 18334.714844 20325.085938
v 3397.880371 18617.148438 20605.044922
v 3524.000977 18788.388672 21205.062500
v 4013.109863 18069.734375 20521.761719
v 4091.489746 18164.126953 21205.062500
v 3758.594238 18406.343750 20718.341797
v 3796.548340 18493.445312 21205.062500
v 3117.922363 18933.730469 20885.001953
v 3204.376465 19167.970703 21261.482422
v 3097.083984 19523.609375 21495.722656
v 4753.542480 18009.273438 19470.761719
v 4818.420898 18182.335938 19795.220703
v 4677.664551 18634.505859 19435.412109
v 4796.404785 18634.505859 19815.160156
v 4901.757324 17789.082031 19690.951172
v 5155.029785 17975.285156 20048.449219
v 5122.587402 18634.505859 20110.101562
v 4306.701660 17804.753906 20718.435547
v 4529.002441 17920.343750 21178.994141
v 5408.302246 18161.490234 20364.283203
v 5033.386719 17874.781250 21358.244141
v 5417.528809 18634.505859 20355.052734
v 4741.041992 19280.929688 19491.951172
v 4818.420898 19121.992188 19778.562500
v 4743.713379 19814.271484 19391.189453
v 4866.537598 19515.248047 19726.271484
v 5083.957031 19280.929688 19995.232422
v 4894.994141 19814.271484 19686.130859
v 5149.244141 19814.271484 20025.296875
v 5431.211426 19224.388672 20370.675781
v 5404.528809 19891.902344 20573.953125
v 5390.297852 20047.162109 21205.062500
v 3640.967773 20404.156250 16807.031250
v 3677.646484 20704.138672 16785.978516
v 3977.628418 20404.156250 17052.847656
v 3946.089355 20938.076172 16968.113281
v 4115.603516 21583.923828 16947.652344
v 4214.160156 21958.109375 16860.183594
v 4294.395996 20404.156250 17321.695312
v 4540.769043 20404.156250 17665.763672
v 4324.594238 20994.041016 17306.070312
v 4662.769531 20988.078125 17717.601562
v 4874.370605 21180.730469 17948.789062
v 4716.105957 20463.142578 18202.007812
v 4609.347656 20404.154297 18845.529297
v 4809.607422 20822.421875 18202.007812
v 4743.713379 20917.689453 18845.529297
v 4917.409180 21058.375000 18202.007812
v 4950.716309 21212.630859 18845.529297
v 4416.404297 21583.923828 17242.593750
v 4711.346191 21583.923828 17568.787109
v 4586.572754 22154.742188 17074.531250
v 4804.031250 21958.121094 17450.066406
v 4942.831543 21583.923828 17863.730469
v 4979.831055 22351.376953 17288.876953
v 5143.430664 22213.433594 17625.867188
v 5052.597168 21583.921875 18255.646484
v 5070.229980 21583.921875 18845.529297
v 5174.848145 22173.804688 18255.646484
v 5155.276855 22173.804688 18845.529297
v 3569.701172 22334.919922 21397.429688
v 4252.036133 21858.328125 20889.585938
v 4156.800293 21778.718750 21205.062500
v 4157.772461 22173.804688 20747.478516
v 3864.483887 22152.498047 21202.505859
v 4743.713379 20404.154297 19317.906250
v 4783.292969 20873.390625 19235.304688
v 4983.911621 20404.154297 19612.847656
v 5217.702148 20404.154297 20025.296875
v 5170.290527 21054.529297 19443.998047
v 5270.988281 20974.150391 19966.306641
v 4824.961914 21205.943359 20847.917969
v 4743.713379 21079.457031 21205.062500
v 5275.629395 20345.166016 20585.771484
v 5114.338867 20404.154297 21205.062500
v 4995.803223 21003.205078 20636.845703
v 4881.436035 20784.515625 21205.062500
v 4779.416992 21756.738281 20175.994141
v 4852.336426 22448.210938 19720.238281
v 4688.768555 22220.472656 19997.738281
v 5242.574707 21583.921875 19391.068359
v 5036.446289 21569.634766 19997.738281
v 5156.895996 22207.138672 19451.824219
v 4934.376465 22054.957031 19782.740234
v 4605.561523 21610.906250 20672.125000
v 4448.771973 21483.777344 21205.062500
v 4357.993164 22173.804688 20452.537109
v 4916.134766 21363.484375 20454.662109
v 5470.890137 17768.234375 20301.681641
v 5728.634277 17975.285156 20617.500000
v 5986.377930 18182.335938 20960.910156
v 5772.761230 18609.021484 20682.492188
v 5986.377930 18395.404297 20960.910156
v 6081.619141 17789.082031 20870.718750
v 6241.874023 18009.273438 21176.546875
v 6337.161133 18803.234375 20876.925781
v 6375.137695 18508.058594 21176.546875
v 5747.277832 19224.388672 20616.796875
v 6021.693848 19512.886719 21479.478516
v 5688.289551 19755.644531 20723.144531
v 5793.951172 19730.822266 21251.736328
v 6315.859375 19246.054688 20864.035156
v 6315.859375 19411.773438 21251.736328
v 6105.030273 19561.296875 20877.574219
v 6105.030273 19561.296875 21086.222656
v 6680.431641 18901.953125 20898.406250
v 6897.053711 18799.488281 21240.654297
v 7270.304688 18881.117188 21461.011719
v 6680.431641 19063.871094 20898.406250
v 6897.053711 19100.816406 21240.654297
v 7270.304688 18994.625000 21461.011719
v 10132.721680 12919.221680 10812.376953
v 10099.539062 12849.680664 11177.045898
v 10114.263672 12900.763672 11590.332031
v 11758.021484 12869.621094 9614.057617
v 12235.993164 12765.756836 9530.925781
v 11274.480469 11817.223633 11322.692383
v 11274.480469 11817.223633 11590.338867
v 10631.432617 12314.649414 10775.570312
v 10754.060547 13027.161133 10288.765625
v 10496.118164 12776.563477 10597.345703
v 11056.226562 12220.355469 10680.568359
v 11056.226562 12885.697266 10152.359375
v 11056.226562 12590.755859 10385.626953
v 10582.130859 12304.280273 11177.045898
v 10644.633789 12379.582031 11766.929688
v 10287.189453 12554.739258 11177.045898
v 10329.752930 12716.751953 11778.947266
v 11069.202148 11994.965820 11146.458008
v 11069.202148 12055.207031 11778.952148
v 12458.111328 11173.970703 10771.910156
v 12349.611328 11555.909180 10655.345703
v 11646.109375 11815.144531 11262.780273
v 11646.109375 11815.144531 11703.235352
v 12406.083008 11154.720703 11177.045898
v 12434.588867 11217.222656 11766.929688
v 12093.736328 11606.508789 11158.245117
v 12103.916992 11606.508789 11821.928711
v 11751.276367 12361.885742 10131.224609
v 11591.233398 12189.983398 10548.843750
v 11558.021484 12658.605469 9923.583008
v 11358.021484 12447.590820 10326.669922
v 12235.993164 12237.484375 10027.361328
v 12193.617188 11939.390625 10530.861328
v 12235.993164 12470.815430 9732.419922
v 11646.109375 11891.490234 10967.837891
v 11646.109375 11877.493164 11998.177734
v 11968.738281 11876.161133 10949.083008
v 11947.699219 11857.500000 12055.222656
v 12928.666016 12311.084961 9633.811523
v 13032.836914 13003.747070 9086.976562
v 12784.124023 12724.478516 9401.312500
v 13421.952148 12128.841797 9582.605469
v 13415.759766 12968.879883 9067.387695
v 13415.759766 12673.938477 9257.730469
v 14005.642578 12194.323242 9506.605469
v 14005.642578 12922.002930 9050.717773
v 14005.642578 12627.061523 9211.663086
v 14595.525391 12307.419922 9569.107422
v 14414.751953 12941.244141 9064.750000
v 14605.037109 12741.040039 9269.330078
v 12708.121094 11173.970703 10771.910156
v 12928.666016 11762.877930 10162.572266
v 12818.392578 11529.041992 10534.303711
v 13553.473633 11236.472656 10771.910156
v 13421.952148 11702.894531 9980.330078
v 13380.410156 11369.507812 10580.035156
v 12873.199219 11153.540039 11138.601562
v 12825.875977 11140.607422 11766.929688
v 13101.375977 11295.207031 10916.343750
v 13380.410156 11188.787109 11138.601562
v 13415.759766 11096.566406 11766.929688
v 13160.217773 11295.207031 10916.343750
v 12732.038086 12083.206055 9934.693359
v 12535.411133 11855.327148 10296.697266
v 12535.411133 12445.209961 9706.814453
v 13421.952148 11892.888672 9744.375977
v 13834.000977 11236.472656 10771.910156
v 14005.642578 11649.240234 10061.436523
v 14020.634766 11344.510742 10580.035156
v 14733.431641 11257.306641 10876.068359
v 14595.525391 11716.800781 10159.060547
v 14560.292969 11398.558594 10642.529297
v 14020.634766 11196.521484 11126.936523
v 14005.642578 11120.814453 11766.929688
v 14227.256836 11275.765625 10896.902344
v 14560.292969 11204.376953 11126.936523
v 14595.525391 11074.387695 11766.929688
v 14340.175781 11275.765625 10896.902344
v 14005.642578 11899.381836 9766.495117
v 14595.525391 12012.478516 9864.119141
v 14953.845703 12397.986328 9654.645508
v 15164.447266 12744.136719 9545.233398
v 15543.728516 12946.404297 9638.972656
v 14995.513672 11257.306641 10876.068359
v 15037.169922 11782.311523 10228.843750
v 15212.968750 11536.185547 10597.939453
v 15775.292969 11684.505859 10730.259766
v 15189.447266 11166.875000 11139.437500
v 15185.408203 10933.910156 11766.929688
v 15388.769531 11290.058594 10917.736328
v 15775.292969 11130.472656 11292.996094
v 15775.292969 10875.125977 11766.929688
v 15775.292969 11389.563477 10998.054688
v 15192.136719 12170.214844 10021.804688
v 15430.425781 11942.444336 10319.812500
v 15347.101562 12553.149414 9814.765625
v 15543.716797 12335.699219 10208.021484
v 15754.324219 12141.759766 10424.153320
v 15740.349609 12717.240234 10000.970703
v 15936.972656 12488.075195 10321.312500
v 16124.490234 11796.593750 10848.681641
v 16228.636719 11173.970703 11394.328125
v 16401.228516 11036.398438 11718.375000
v 16373.191406 11547.892578 11178.156250
v 16621.892578 11299.191406 11489.377930
v 16955.058594 11139.257812 11846.722656
v 16839.367188 11692.447266 11355.240234
v 17003.621094 11519.855469 11541.423828
v 16338.742188 12140.204102 10696.958984
v 16365.175781 12853.557617 10187.252930
v 16365.175781 12558.616211 10380.798828
v 16795.322266 12333.107422 10774.490234
v 16735.197266 12943.824219 10257.310547
v 16961.886719 12732.212891 10578.402344
v 16517.746094 11939.851562 10961.985352
v 17013.972656 12100.667969 11158.612305
v 17232.623047 11868.228516 11481.324219
v 17188.578125 12520.601562 10961.985352
v 9450.477539 13010.082031 16739.568359
v 9876.459961 12984.189453 16687.638672
v 10714.768555 12415.051758 12171.093750
v 10584.212891 12729.129883 12363.358398
v 10683.108398 12921.393555 12719.309570
v 11037.187500 12261.522461 12363.358398
v 11221.123047 12335.483398 12823.474609
v 10827.868164 12528.138672 12564.349609
v 11066.158203 12703.933594 12968.020508
v 11304.448242 12879.727539 13319.820312
v 12501.033203 11255.476562 12356.812500
v 12525.881836 11257.306641 12656.807617
v 12231.843750 11555.909180 12356.812500
v 12332.849609 11569.720703 12890.739258
v 12374.787109 11775.555664 13382.208008
v 11646.109375 11966.791016 12356.812500
v 11602.062500 12187.355469 12990.739258
v 11376.070312 12486.471680 13216.730469
v 11966.802734 11876.602539 12356.812500
v 11992.176758 11908.006836 12946.696289
v 11769.326172 12292.626953 13412.270508
v 11645.618164 12724.766602 13562.673828
v 11915.165039 12963.062500 13847.194336
v 12170.916016 12099.767578 13593.866211
v 12360.300781 12300.164062 13982.412109
v 11967.045898 12569.806641 13805.526367
v 12204.848633 12714.349609 14111.430664
v 10466.343750 12968.564453 16656.390625
v 11056.226562 12968.564453 16672.011719
v 12442.650391 12858.891602 14613.963867
v 11646.109375 12968.564453 16688.525391
v 12235.993164 12976.304688 16704.150391
v 8106.810547 13015.296875 17310.712891
v 8106.810547 12937.474609 17665.761719
v 8696.694336 12984.045898 17187.794922
v 8696.694336 12843.721680 17665.761719
v 8106.810547 12883.901367 18255.644531
v 8154.317383 12969.374023 18807.419922
v 8696.694336 12712.029297 18255.644531
v 8696.694336 12780.490234 18845.527344
v 9266.940430 12928.063477 17018.740234
v 9286.577148 12704.441406 17665.761719
v 10084.609375 12437.276367 17915.578125
v 9876.459961 12798.344727 17075.876953
v 9883.373047 12543.910156 17697.673828
v 9574.089844 12439.653320 18442.958984
v 9574.089844 12439.653320 18561.974609
v 9341.108398 12530.331055 18250.056641
v 9341.108398 12580.333984 18793.373047
v 9883.373047 12424.862305 18250.056641
v 9876.459961 12423.487305 18672.287109
v 9691.353516 12467.231445 18049.705078
v 9876.459961 12516.340820 18967.228516
v 8382.616211 13020.403320 19175.285156
v 8696.694336 12958.752930 19279.740234
v 9331.704102 12899.858398 19466.949219
v 9558.416992 13013.862305 19736.892578
v 9876.459961 12723.649414 19435.410156
v 9876.459961 12942.983398 19787.041016
v 10466.343750 12413.073242 17826.490234
v 10466.343750 12737.787109 17075.876953
v 10466.343750 12504.897461 17531.548828
v 11056.226562 12383.604492 17744.349609
v 11056.226562 12718.140625 17075.876953
v 11056.226562 12485.251953 17449.406250
v 10466.343750 12364.576172 18255.644531
v 10438.020508 12401.288086 18877.066406
v 10222.512695 12460.487305 19094.720703
v 11056.226562 12335.107422 18255.644531
v 11056.226562 12390.616211 18845.527344
v 11646.109375 12376.610352 17713.107422
v 11646.109375 12705.341797 17075.876953
v 11646.109375 12472.452148 17418.164062
v 12235.993164 12392.236328 17713.107422
v 12235.993164 12720.823242 17075.876953
v 12235.993164 12480.193359 17418.164062
v 11646.109375 12343.739258 18255.644531
v 11646.109375 12390.616211 18845.527344
v 12251.935547 12388.787109 18236.468750
v 12251.935547 12413.788086 18881.962891
v 12459.191406 12460.487305 18420.312500
v 12459.191406 12460.487305 18709.626953
v 10615.768555 12439.653320 19285.984375
v 10438.020508 12520.099609 19463.730469
v 10493.490234 12816.287109 20007.730469
v 11006.830078 12422.474609 19463.730469
v 11160.267578 12387.468750 20025.294922
v 10777.270508 12456.718750 19679.240234
v 10865.326172 12542.830078 20025.294922
v 10719.782227 12971.552734 20615.177734
v 10759.016602 13028.347656 20912.386719
v 11223.580078 12351.312500 20615.177734
v 11221.645508 12326.013672 21205.060547
v 10928.638672 12676.610352 20615.177734
v 10910.232422 12793.300781 21147.433594
v 12341.159180 11796.387695 21403.873047
v 11646.109375 12359.502930 19435.410156
v 11646.109375 12265.750000 20025.294922
v 12235.993164 12337.924805 19435.410156
v 12235.993164 12197.294922 20025.294922
v 11646.109375 12162.185547 20615.177734
v 11646.109375 12073.493164 21205.060547
v 12235.993164 12061.434570 20615.177734
v 12181.117188 11913.775391 21206.371094
v 14726.878906 10614.054688 13104.043945
v 14164.178711 10614.054688 13663.972656
v 14164.178711 10614.054688 13982.421875
v 14556.360352 10555.929688 13495.038086
v 14595.525391 10569.914062 14076.468750
v 12825.875977 11204.154297 12356.812500
v 12825.875977 11255.476562 12667.217773
v 12825.875977 11456.503906 12962.159180
v 13366.945312 11184.733398 12375.145508
v 13137.775391 11257.306641 12667.320312
v 13531.030273 11298.975586 12583.995117
v 13366.945312 11398.062500 12897.046875
v 12825.875977 11751.445312 13388.955078
v 13663.980469 11151.744141 13709.612305
v 13663.980469 11151.744141 14003.245117
v 13434.756836 11552.836914 13503.551758
v 13573.375977 11502.580078 14170.508789
v 12825.875977 11992.677734 13683.896484
v 12794.330078 12318.242188 14098.538086
v 12794.330078 12465.144531 14334.491211
v 13205.534180 11983.895508 13690.746094
v 13256.947266 12166.630859 14125.979492
v 13136.599609 12456.515625 14322.286133
v 13989.815430 11148.775391 12375.145508
v 14115.633789 11076.001953 12946.696289
v 13782.635742 11298.975586 12583.995117
v 13820.692383 11327.798828 12946.696289
v 14595.525391 10952.355469 12356.812500
v 14556.360352 10774.841797 12923.127930
v 13974.799805 10927.935547 13490.165039
v 13942.156250 10932.296875 14189.460938
v 13785.420898 11312.068359 13316.357422
v 13720.133789 11270.400391 14396.501953
v 14333.623047 10704.126953 13270.715820
v 14595.525391 10718.105469 14371.410156
v 13640.458008 11663.656250 14593.128906
v 12752.464844 12756.017578 14691.592773
v 13532.014648 12189.249023 14760.392578
v 13663.980469 12414.846680 15028.352539
v 13260.821289 12686.156250 14748.071289
v 13578.927734 12735.674805 15159.729492
v 12666.151367 12999.569336 16739.568359
v 13536.599609 12999.569336 16718.734375
v 14113.388672 11106.104492 14555.421875
v 13951.727539 11514.449219 14770.903320
v 14183.320312 11758.499023 15070.021484
v 14595.525391 11013.046875 14604.059570
v 14644.332031 11559.486328 14919.196289
v 14480.242188 11758.499023 15070.021484
v 13790.065430 12021.590820 14986.384766
v 13994.272461 12189.248047 15167.657227
v 13954.510742 12683.776367 15476.885742
v 14873.498047 11867.819336 15007.518555
v 14644.332031 12096.985352 15217.660156
v 14575.050781 12683.776367 15506.646484
v 14117.049805 12845.804688 15629.937500
v 14005.642578 12984.045898 16672.011719
v 14364.770508 12845.804688 15629.937500
v 14595.525391 12976.304688 16609.517578
v 15185.408203 10601.166016 13014.715820
v 15585.601562 10634.888672 13076.668945
v 15185.408203 10515.621094 13536.579102
v 15185.408203 10585.540039 14021.844727
v 15606.974609 10616.791016 13536.579102
v 15543.933594 10634.888672 13909.588867
v 15185.408203 10777.655273 12356.812500
v 15185.408203 10694.900391 12719.774414
v 15775.292969 10718.870117 12356.812500
v 15779.453125 10693.414062 12906.702148
v 15185.408203 10760.076172 14316.786133
v 15901.916016 10759.337891 13536.579102
v 15789.472656 10962.263672 14147.884766
v 16035.009766 11296.191406 14386.179688
v 16365.175781 10790.003906 12356.812500
v 16365.175781 10812.470703 12946.696289
v 16955.058594 10984.208008 12356.812500
v 16980.412109 11084.730469 12947.048828
v 17193.941406 11337.859375 13143.911133
v 16390.521484 11043.419922 13574.425781
v 16210.791016 11155.716797 13992.924805
v 16604.046875 11278.141602 13796.285156
v 16428.259766 11483.793945 14199.968750
v 16800.687500 11173.970703 13403.029297
v 16980.412109 11427.707031 13574.425781
v 16955.058594 11706.666016 14004.284180
v 16645.728516 11865.240234 14407.014648
v 16955.058594 11894.901367 14299.225586
v 15185.408203 11055.017578 14554.437500
v 15185.408203 11555.909180 14781.223633
v 15641.753906 11162.066406 14489.257812
v 15813.146484 11518.054688 14581.043945
v 15185.408203 11981.814453 14943.131836
v 15185.408203 12276.754883 15131.449219
v 15185.408203 12735.674805 15379.594727
v 15799.937500 12224.076172 14892.876953
v 15745.876953 12416.697266 15083.063477
v 15745.876953 12676.686523 15291.049805
v 15392.166016 13020.403320 16158.817383
v 15191.486328 12968.539062 16457.666016
v 15642.943359 13020.403320 16158.817383
v 15731.980469 12984.045898 16485.994141
v 16252.470703 11689.447266 14510.092773
v 16386.041016 12193.630859 14763.484375
v 16231.625000 12439.653320 15071.101562
v 16486.218750 12467.161133 14953.528320
v 16403.021484 12697.827148 15229.259766
v 16955.058594 12189.842773 14624.589844
v 16980.412109 12697.828125 14916.748047
v 16800.687500 12869.223633 15151.857422
v 12597.289062 12418.818359 17806.054688
v 12848.018555 12881.762695 17042.904297
v 12806.701172 12574.621094 17631.960938
v 13370.287109 12900.563477 17042.904297
v 13415.759766 12640.604492 17665.761719
v 12597.289062 12418.818359 18027.056641
v 12568.522461 12439.653320 19102.880859
v 12806.701172 12530.092773 18236.468750
v 12789.440430 12526.285156 18881.962891
v 13415.759766 12577.067383 18255.644531
v 13415.759766 12584.063477 18845.527344
v 14115.969727 12415.040039 17889.380859
v 14005.642578 12786.279297 17075.876953
v 13953.862305 12525.681641 17681.955078
v 14595.525391 12373.777344 17806.841797
v 14595.525391 12759.051758 17075.876953
v 14595.525391 12518.421875 17511.900391
v 14054.913086 12373.777344 18255.644531
v 14066.668945 12328.835938 18845.527344
v 13759.971680 12480.183594 18255.644531
v 13771.726562 12491.939453 18845.527344
v 14595.525391 12231.526367 18255.644531
v 14595.525391 12116.341797 18845.527344
v 12825.875977 11769.156250 21371.433594
v 13415.759766 11716.483398 21365.402344
v 12789.440430 12405.211914 19446.845703
v 12825.875977 12287.033203 20025.294922
v 12961.777344 12481.321289 19257.841797
v 13164.958008 12439.653320 19651.095703
v 13187.027344 12408.752930 20025.294922
v 13383.254883 12523.188477 19446.845703
v 13527.651367 12718.176758 20084.216797
v 12825.875977 12161.875977 20615.177734
v 12825.875977 11977.041992 21076.492188
v 13227.055664 12352.046875 20615.177734
v 13415.276367 12158.766602 21056.365234
v 13509.269531 12735.674805 20615.177734
v 13623.715820 12735.674805 20945.230469
v 14810.011719 11817.222656 19656.447266
v 14701.250000 11722.290039 20025.294922
v 14238.393555 11236.470703 21437.802734
v 14283.721680 11758.692383 20839.867188
v 14064.430664 11545.796875 21220.189453
v 14839.978516 11252.145508 20847.916016
v 14624.220703 11188.778320 21226.728516
v 14582.677734 11539.250977 20647.263672
v 14446.722656 11365.436523 21044.546875
v 14046.137695 12274.210938 19435.410156
v 14146.506836 12215.579102 20025.294922
v 13751.196289 12513.361328 19435.410156
v 13932.800781 12718.176758 20084.216797
v 14606.240234 11977.217773 19450.056641
v 14406.308594 11920.637695 20025.294922
v 14257.133789 12128.407227 20642.257812
v 14024.868164 12101.749023 20983.566406
v 14216.059570 12735.674805 20541.570312
v 13915.903320 12735.674805 20945.230469
v 14315.459961 12003.476562 20535.111328
v 15424.701172 12439.653320 17350.298828
v 15211.007812 12351.285156 17644.455078
v 15211.007812 12642.829102 17122.552734
v 15031.445312 12477.552734 17433.623047
v 15770.042969 12438.724609 17357.146484
v 15770.042969 12346.828125 17606.771484
v 15808.216797 12709.734375 17086.755859
v 15185.408203 12109.355469 18255.644531
v 15185.408203 11957.114258 18845.527344
v 15775.292969 12089.859375 18255.644531
v 15721.957031 11904.552734 18904.517578
v 16255.148438 12438.464844 17368.552734
v 16417.134766 12384.978516 17613.988281
v 16417.134766 12683.901367 17216.544922
v 16648.402344 12452.757812 17382.845703
v 16732.820312 12418.818359 17776.099609
v 16955.058594 12853.252930 17208.992188
v 16939.691406 12567.000977 17613.988281
v 16365.175781 12226.621094 18255.644531
v 16365.175781 12089.861328 18845.527344
v 16813.076172 12388.367188 18255.644531
v 16891.203125 12341.491211 18845.527344
v 17108.017578 12495.803711 18255.644531
v 17186.144531 12470.364258 18845.527344
v 15185.408203 11758.444336 19529.613281
v 15185.408203 11507.858398 20025.294922
v 15721.957031 11743.352539 19404.878906
v 15716.484375 11399.907227 20084.283203
v 15185.408203 11227.195312 20716.220703
v 15185.408203 11065.448242 21205.060547
v 15185.408203 11305.323242 20421.279297
v 15716.484375 11192.516602 20590.125000
v 15775.292969 10951.154297 21205.060547
v 15716.484375 11271.451172 20354.171875
v 15185.408203 11882.550781 19234.671875
v 15721.957031 11857.402344 19168.925781
v 16365.175781 11774.069336 19589.136719
v 16365.175781 11565.456055 20025.294922
v 16675.490234 11838.056641 19694.144531
v 16781.835938 11767.231445 20025.294922
v 16365.175781 11191.030273 20793.314453
v 16365.175781 10991.190430 21205.060547
v 16365.175781 11347.293945 20498.373047
v 16684.611328 11245.592773 20894.746094
v 16910.767578 11191.875000 21249.351562
v 16942.451172 11556.814453 20668.697266
v 17077.867188 11361.476562 21082.251953
v 16365.175781 11941.039062 19294.195312
v 16952.867188 12201.356445 19507.933594
v 17076.777344 12050.417969 20025.294922
v 17230.246094 12460.487305 19321.724609
v 17200.291016 11921.392578 20442.648438
v 9554.431641 17728.943359 7243.112793
v 10050.874023 17708.111328 6611.573242
v 9863.131836 17618.794922 7047.037109
v 10619.930664 17695.423828 6087.948730
v 11056.226562 17652.677734 6034.777344
v 10589.979492 17050.984375 7233.991699
v 10440.518555 17601.894531 6432.160156
v 10422.548828 17304.994141 7041.564453
v 11056.226562 16952.525391 7135.533691
v 11056.226562 17408.199219 6457.981934
v 11056.226562 17210.263672 6840.592285
v 11646.109375 17646.564453 6020.042969
v 12235.993164 17671.699219 6051.293945
v 11646.109375 16924.994141 7186.127930
v 11646.109375 17421.279297 6457.981934
v 11646.109375 17229.455078 6891.186523
v 12235.993164 17003.121094 7303.391602
v 12235.993164 17499.978516 6457.981934
v 12235.993164 17283.021484 7008.450195
v 8963.576172 15382.925781 9692.331055
v 9286.577148 15334.065430 9635.696289
v 9876.459961 15273.192383 9541.952148
v 8106.810547 15323.660156 10185.552734
v 8106.810547 15126.945312 10587.164062
v 8738.847656 15278.445312 9982.288086
v 8696.694336 15060.851562 10587.164062
v 7882.003906 14792.837891 11464.559570
v 8089.903320 14706.174805 11746.334961
v 8089.903320 14904.749023 11231.577148
v 8275.258789 14843.434570 11535.978516
v 8717.288086 14760.503906 11961.521484
v 8696.694336 14951.175781 11177.045898
v 8717.288086 14841.109375 11725.568359
v 10099.539062 13325.558594 10722.680664
v 10116.946289 13915.442383 10736.064453
v 9982.581055 13325.558594 11177.045898
v 10043.552734 13301.163086 11778.947266
v 10028.341797 13915.442383 11177.045898
v 10012.715820 13915.442383 11766.929688
v 9286.577148 15144.046875 9997.280273
v 9286.577148 14967.251953 10587.163086
v 10125.088867 14762.666992 10245.909180
v 10060.703125 14511.278320 10659.537109
v 9907.661133 14974.149414 10028.480469
v 9722.013672 14851.769531 10587.163086
v 9484.416992 14762.666992 11354.040039
v 9287.303711 14732.586914 11805.150391
v 9287.303711 14864.857422 11165.265625
v 9091.162109 14825.168945 11634.003906
v 9919.541016 14498.438477 11168.631836
v 9946.955078 14419.018555 11766.929688
v 9618.530273 14816.444336 10960.784180
v 8106.810547 15826.470703 9606.155273
v 7956.219727 16529.748047 9072.480469
v 8134.432617 16309.862305 9290.334961
v 8738.847656 15657.593750 9590.397461
v 8696.694336 16274.974609 9364.202148
v 8106.810547 17074.246094 8440.079102
v 8106.810547 17454.740234 8225.660156
v 8696.694336 17072.158203 8364.040039
v 8871.010742 17605.548828 7853.830078
v 8683.307617 17427.248047 8067.775391
v 8134.432617 16748.435547 8852.517578
v 8349.474609 16588.265625 9143.911133
v 8696.694336 16883.912109 8817.514648
v 8696.694336 16676.613281 9201.682617
v 10114.263672 16419.443359 8434.591797
v 9286.577148 15685.091797 9425.372070
v 9286.577148 16274.974609 9294.193359
v 10035.104492 15824.195312 8961.972656
v 9853.669922 15650.576172 9235.286133
v 9962.551758 16243.681641 8786.212891
v 9658.250977 16274.974609 9162.924805
v 9286.577148 17103.408203 8288.072266
v 9329.313477 17539.277344 7649.420898
v 9286.577148 17207.287109 7993.130859
v 10041.752930 17050.984375 7782.218750
v 9881.380859 16892.544922 8196.295898
v 9857.659180 17296.302734 7606.453613
v 9648.498047 17170.623047 7958.000488
v 9311.217773 17071.056641 8848.469727
v 9311.217773 16880.216797 9227.004883
v 9524.272461 17169.029297 9065.735352
v 9524.272461 17169.029297 9173.877930
v 9752.125000 16904.382812 8848.469727
v 9690.159180 16864.857422 9190.007812
v 9684.393555 17169.029297 9065.735352
v 9684.393555 17169.029297 9173.877930
v 8106.810547 15531.529297 9890.611328
v 8570.321289 15442.633789 9775.666992
v 10752.559570 14131.523438 9693.613281
v 11209.805664 13458.308594 9634.891602
v 11030.397461 13927.114258 9603.666992
v 10731.228516 14521.988281 9671.576172
v 10756.640625 15389.273438 9111.580078
v 10541.650391 15148.889648 9416.936523
v 10997.238281 14521.988281 9578.138672
v 11056.226562 15373.209961 9095.516602
v 11056.226562 15078.268555 9324.903320
v 11595.279297 13287.231445 9530.219727
v 11646.109375 13915.442383 9358.476562
v 12484.610352 13553.353516 9086.964844
v 12267.186523 13344.259766 9250.572266
v 12392.113281 13915.442383 9033.967773
v 12097.171875 13915.442383 9180.331055
v 11646.109375 14505.325195 9312.491211
v 11646.109375 15373.209961 9095.516602
v 11646.109375 15078.268555 9212.473633
v 12297.252930 14505.325195 8993.714844
v 12002.311523 14505.325195 9134.345703
v 12159.850586 15167.634766 9116.632812
v 10617.486328 13325.558594 10154.066406
v 10322.544922 13325.558594 10427.739258
v 10555.589844 13927.114258 9947.818359
v 10215.767578 13915.442383 10441.123047
v 11030.397461 13287.231445 9835.928711
v 10816.551758 13738.268555 9718.215820
v 10197.600586 13088.271484 11983.587891
v 10464.813477 14549.568359 9974.123047
v 10206.676758 14366.783203 10548.251953
v 10326.662109 14908.505859 9852.653320
v 11364.765625 13065.053711 9715.940430
v 10631.635742 15912.887695 8473.379883
v 10650.862305 16502.769531 7823.875000
v 10444.621094 16264.480469 8257.358398
v 11056.226562 15819.641602 8355.030273
v 11056.226562 16393.894531 7725.416504
v 11056.226562 16098.954102 8060.087891
v 10497.509766 15671.914062 8840.149414
v 10363.385742 15430.939453 9174.083008
v 10238.380859 16026.190430 8568.717773
v 11056.226562 15524.700195 8800.575195
v 10423.792969 16854.357422 7606.418945
v 10257.606445 16657.728516 8041.336914
v 10196.724609 17200.591797 7388.963379
v 11056.226562 16657.583984 7430.475586
v 11646.109375 15765.609375 8250.637695
v 11646.109375 16302.968750 7683.229492
v 11646.109375 16008.027344 7955.695801
v 12235.993164 15802.500000 8239.999023
v 12235.993164 16302.968750 7700.718262
v 12235.993164 16008.027344 7945.056641
v 11646.109375 15470.666992 8800.575195
v 12189.317383 15489.859375 8875.977539
v 12354.828125 15399.786133 9116.632812
v 11646.109375 16630.052734 7388.288086
v 12235.993164 16708.177734 7405.776855
v 8859.406250 19956.152344 4908.290527
v 10143.342773 18916.863281 4970.684570
v 9428.463867 19407.937500 4913.542969
v 9253.732422 19781.425781 4799.790527
v 9918.613281 19216.542969 4845.857910
v 10050.885742 20009.535156 4356.211426
v 9863.138672 19813.453125 4520.803223
v 8951.875000 18889.691406 5554.231445
v 8825.281250 18763.105469 5868.098633
v 8106.810547 18739.888672 7137.459961
v 8922.892578 18288.873047 6599.872070
v 8802.814453 18218.736328 7047.865234
v 8730.328125 18584.275391 6425.139160
v 8493.791992 18583.685547 6997.035156
v 8341.166016 19458.740234 5533.393555
v 8129.448242 19337.394531 5853.104492
v 8129.448242 19799.406250 5410.685059
v 7947.911133 19592.867188 5646.480957
v 8731.827148 19247.023438 5433.609863
v 8530.338867 19042.412109 5868.098633
v 8676.344727 19781.425781 5106.877441
v 8106.810547 19101.492188 6457.981934
v 8106.810547 18988.531250 6842.518555
v 8421.617188 18966.208984 6457.981934
v 8413.657227 18963.880859 6766.520508
v 9407.633789 18247.205078 6009.976562
v 9286.577148 18789.603516 5464.552246
v 9241.234375 18472.398438 5835.249023
v 10101.686523 18311.519531 5545.110352
v 9893.619141 18161.904297 5835.249023
v 9925.887695 18653.175781 5299.565430
v 9708.431641 18389.492188 5616.721680
v 9241.234375 18148.314453 6425.139160
v 9329.313477 17901.531250 7047.037109
v 9014.376953 18354.158203 6206.616699
v 9863.131836 17837.357422 6432.160156
v 9657.618164 17770.613281 6849.857422
v 9253.732422 19216.542969 5145.986328
v 9035.208008 19562.898438 5006.013184
v 9750.087891 19014.683594 5054.020996
v 8335.901367 20587.705078 4947.174805
v 8271.725586 20994.042969 4922.428223
v 8676.344727 20396.310547 4844.970215
v 8696.694336 20994.042969 4729.754883
v 8257.072266 21583.925781 4931.356934
v 8335.190430 22173.808594 4962.608398
v 8696.694336 21583.925781 4738.684082
v 8696.694336 22173.808594 4814.714355
v 9548.203125 20599.417969 4377.033691
v 9325.576172 20403.337891 4534.021484
v 9541.293945 20994.042969 4376.523438
v 9246.352539 20994.042969 4495.659668
v 9863.138672 20403.337891 4307.587402
v 9657.629883 20206.162109 4428.926758
v 9876.459961 20994.042969 4242.319824
v 9561.200195 21392.625000 4387.258789
v 9333.375000 21587.123047 4484.026855
v 9286.577148 22173.808594 4578.116699
v 9834.984375 21587.123047 4307.349609
v 9610.705078 21785.882812 4408.092773
v 10003.961914 22065.845703 4345.590332
v 9834.984375 22227.007812 4429.326660
v 8126.289062 20396.310547 5108.955566
v 7976.783203 20994.042969 5038.503906
v 8466.150391 20194.451172 5009.677246
v 7962.129883 21583.925781 5007.252930
v 8040.249023 22173.808594 4991.627441
v 10466.343750 18848.064453 4914.687012
v 11056.226562 18765.761719 4836.567383
v 10724.101562 19502.988281 4387.258789
v 10503.022461 19273.574219 4604.427246
v 10503.022461 19813.453125 4313.722168
v 10330.845703 19616.279297 4443.312500
v 11056.226562 19435.140625 4352.940430
v 11056.226562 19140.199219 4541.625488
v 11056.226562 19814.275391 4203.112305
v 11646.109375 18734.515625 4790.518555
v 12235.993164 18730.808594 4767.009277
v 11646.109375 19344.212891 4306.063965
v 11646.109375 19049.269531 4495.577148
v 11646.109375 19814.275391 4124.984375
v 12235.993164 19312.960938 4290.438477
v 12235.993164 19018.019531 4472.067383
v 12235.993164 19814.275391 4082.049805
v 10466.343750 18246.597656 5492.986328
v 10440.518555 17923.820312 5882.032227
v 10466.343750 18553.123047 5198.044434
v 11056.226562 18186.023438 5426.460449
v 11056.226562 17891.082031 5739.835938
v 11056.226562 18470.820312 5131.518555
v 10226.674805 17770.613281 6218.317871
v 11646.109375 18171.289062 5398.035645
v 11646.109375 17876.347656 5725.101562
v 11646.109375 18439.574219 5103.093750
v 12235.993164 18183.626953 5405.776367
v 12235.993164 17888.685547 5756.352539
v 12235.993164 18435.867188 5110.834961
v 10466.343750 20404.158203 4132.950195
v 10466.343750 20994.042969 4062.481934
v 11056.226562 20404.158203 4034.276611
v 11056.226562 20994.042969 3971.774414
v 10466.343750 21583.925781 4109.358887
v 10413.148438 22227.007812 4269.848633
v 10181.056641 22459.101562 4403.046387
v 11056.226562 21583.925781 3985.326172
v 11056.226562 22173.808594 4094.705566
v 11646.109375 20404.158203 3983.601562
v 11646.109375 20994.042969 3921.099121
v 12235.993164 20404.158203 3937.621582
v 12235.993164 20994.042969 3886.802246
v 11646.109375 21583.925781 3922.823975
v 11646.109375 22173.808594 4016.577637
v 12235.993164 21583.925781 3890.600830
v 12235.993164 22173.808594 3984.354492
v 8106.810547 18181.095703 7742.978027
v 8106.810547 17886.154297 8013.211914
v 8106.810547 18444.947266 7448.036133
v 8643.186523 18027.468750 7605.122559
v 8477.755859 17825.783203 7975.954590
v 8415.361328 18353.173828 7356.416016
v 9161.176758 17835.898438 7460.574219
v 12679.041016 17708.111328 6108.783203
v 12825.875977 17063.687500 7295.579102
v 12855.751953 17599.865234 6415.605469
v 12825.875977 17298.646484 7000.637207
v 13415.759766 17100.744141 7296.397949
v 13415.759766 17640.457031 6594.309570
v 13415.759766 17345.513672 7001.456543
v 13745.503906 17145.830078 7332.701660
v 13766.350586 17708.111328 6710.379395
v 13952.555664 17483.619141 7102.889648
v 14397.889648 17652.386719 7266.332520
v 12832.075195 13344.259766 9011.105469
v 12639.581055 13160.098633 9168.812500
v 12825.875977 13915.443359 8849.162109
v 13415.759766 13325.559570 8903.931641
v 13415.759766 13915.443359 8777.658203
v 12825.875977 14505.326172 8822.374023
v 12772.669922 15105.620117 9004.963867
v 12772.669922 15341.574219 9120.499023
v 13415.759766 14505.326172 8822.374023
v 13415.759766 15013.056641 8993.715820
v 13415.759766 15307.999023 9141.924805
v 14005.642578 13325.559570 8931.978516
v 14005.642578 13915.443359 8903.253906
v 14479.800781 13325.558594 9032.931641
v 14774.742188 13325.558594 9165.596680
v 14425.264648 13915.442383 9053.246094
v 14720.206055 13915.442383 9165.596680
v 14029.447266 14491.631836 9005.091797
v 14241.946289 14679.128906 9137.465820
v 13848.690430 14917.422852 9054.128906
v 14029.447266 15106.513672 9201.040039
v 14342.037109 14285.873047 9091.833984
v 14561.409180 14491.631836 9207.476562
v 14638.859375 15154.197266 9468.489258
v 12825.875977 15865.002930 8286.875977
v 12825.875977 16334.219727 7731.969238
v 12825.875977 16039.278320 7991.933105
v 13240.553711 15924.179688 8396.692383
v 13415.759766 16412.345703 7798.404785
v 13428.612305 16111.065430 8211.090820
v 12772.669922 15636.826172 8876.502930
v 12772.669922 15492.897461 9120.499023
v 13266.038086 15911.878906 8817.514648
v 13401.105469 15723.068359 9155.026367
v 13560.979492 16030.196289 8817.514648
v 13587.964844 16011.692383 9144.115234
v 12825.875977 16768.746094 7437.028320
v 13415.759766 16805.802734 7503.463867
v 13808.018555 16506.537109 7877.040039
v 14005.044922 16396.060547 8215.734375
v 14439.557617 16504.943359 8404.430664
v 14005.642578 15685.091797 9264.569336
v 14005.642578 16196.584961 8817.514648
v 14005.642578 16071.425781 9172.598633
v 14680.794922 15589.309570 9563.465820
v 14619.921875 16458.689453 8818.112305
v 14595.525391 16184.671875 9280.852539
v 13973.388672 16897.115234 7646.539062
v 14201.273438 16648.400391 8011.175293
v 14138.759766 17259.130859 7416.038086
v 14481.226562 17041.658203 7809.293457
v 14657.019531 16821.615234 8173.973145
v 14636.186523 17411.505859 7602.248535
v 14874.482422 17170.623047 7943.515137
v 14832.812500 16601.576172 8621.882812
v 15185.408203 13325.558594 9299.925781
v 15185.408203 13915.442383 9224.462891
v 15754.332031 13334.019531 9548.321289
v 15775.292969 13915.442383 9368.142578
v 15185.408203 14505.325195 9310.259766
v 15185.408203 15095.208008 9538.901367
v 15775.292969 14505.325195 9388.386719
v 15757.671875 15115.088867 9599.563477
v 16133.621094 13536.288086 9659.792969
v 16228.925781 13915.442383 9604.218750
v 16308.164062 14505.325195 9585.542969
v 16239.271484 14931.715820 9634.891602
v 15936.984375 13143.033203 9793.919922
v 15942.552734 15324.970703 9746.684570
v 16344.218750 13334.019531 9920.873047
v 16523.867188 13915.442383 9821.852539
v 16811.953125 13325.558594 10201.762695
v 17106.894531 13325.558594 10411.735352
v 16866.794922 13915.442383 10116.793945
v 17161.736328 13915.442383 10396.109375
v 16603.105469 14505.325195 9759.349609
v 16407.609375 15115.088867 9840.088867
v 16869.847656 14505.325195 10054.291016
v 17164.789062 14505.325195 10411.735352
v 16787.929688 15095.208008 10136.209961
v 17082.871094 15095.208008 10489.855469
v 15094.931641 15602.949219 9687.067383
v 14929.458984 16555.941406 9015.137695
v 15034.158203 16325.578125 9454.007812
v 15549.296875 15417.428711 9697.382812
v 15185.408203 16980.492188 8321.997070
v 15185.408203 17544.201172 7763.283691
v 15185.408203 17249.259766 8027.055176
v 15540.164062 17085.691406 8440.940430
v 15570.228516 17661.509766 7851.045410
v 15751.824219 17423.212891 8187.661133
v 15149.816406 16709.517578 8818.112305
v 15353.267578 16637.638672 9407.397461
v 15752.191406 17012.486328 8786.090820
v 15775.292969 16821.419922 9407.397461
v 15933.419922 17184.917969 8568.513672
v 16365.175781 17543.003906 8270.206055
v 16955.058594 17640.457031 8363.958984
v 16183.416016 17106.525391 8961.768555
v 16286.884766 17048.638672 9407.397461
v 16374.097656 17257.982422 8786.090820
v 16581.826172 17201.185547 9407.397461
v 16955.058594 17480.646484 8817.514648
v 16955.058594 17374.994141 9407.397461
v 15197.164062 15709.348633 9803.014648
v 15364.691406 16232.475586 9954.969727
v 15766.753906 15676.552734 9988.255859
v 15984.208984 15935.676758 10357.413086
v 15552.126953 16232.475586 10190.922852
v 15784.427734 16265.326172 10494.485352
v 15468.541016 16581.724609 9792.528320
v 15721.718750 16674.025391 9992.405273
v 15782.060547 16614.929688 10449.819336
v 16365.175781 15533.586914 10148.774414
v 16397.548828 15844.715820 10567.290039
v 16212.958984 16244.976562 10764.374023
v 16699.095703 15429.127930 10253.243164
v 16919.457031 15553.289062 10632.225586
v 16615.759766 15956.510742 10926.461914
v 16448.912109 16244.976562 10987.833984
v 16955.058594 15859.781250 11038.595703
v 16994.453125 16301.875977 11322.365234
v 17217.343750 16516.439453 11522.981445
v 16411.597656 16995.931641 9985.385742
v 16357.548828 16734.978516 10607.282227
v 16639.175781 17169.029297 9780.827148
v 16736.587891 17118.240234 10174.083008
v 16826.767578 17026.171875 10587.164062
v 16941.953125 17270.943359 9985.385742
v 17121.710938 17239.431641 10587.164062
v 16549.093750 16629.935547 11013.962891
v 17011.595703 16868.228516 11158.505859
v 17217.343750 16713.271484 11522.981445
v 17199.103516 17187.486328 10909.792969
v 12825.875977 18762.054688 4784.640625
v 13415.759766 18853.871094 4892.075684
v 12825.875977 19344.212891 4301.227539
v 12825.875977 19049.269531 4489.699219
v 12825.875977 19814.275391 4081.156006
v 13415.759766 19428.144531 4333.448242
v 13415.759766 19133.203125 4597.133789
v 13415.759766 19814.275391 4125.059570
v 13715.548828 18924.601562 4978.425293
v 13757.208984 19493.664062 4367.716797
v 13933.006836 19257.347656 4729.718750
v 13974.558594 19810.236328 4261.277344
v 14150.463867 19610.914062 4481.012207
v 14430.427734 19414.289062 4874.266602
v 14409.590820 20004.171875 4330.013184
v 14616.637695 19795.140625 4667.222656
v 12825.875977 18245.238281 5452.653320
v 12855.751953 17915.121094 5894.532715
v 12825.875977 18467.113281 5157.711426
v 13197.277344 18306.156250 5518.912109
v 13402.647461 18173.109375 5881.204102
v 13402.647461 18549.654297 5304.656250
v 13590.533203 18397.230469 5693.313477
v 13072.296875 17757.927734 6190.727051
v 13415.759766 17861.607422 6299.368164
v 13774.487305 18283.927734 6086.568359
v 13849.819336 18821.589844 5278.215820
v 14029.542969 18625.103516 5837.860352
v 14377.055664 18852.976562 5982.408203
v 13967.046875 18076.880859 6507.209961
v 14159.606445 17869.835938 6873.077148
v 14167.743164 18459.718750 6304.040039
v 14356.221680 18263.091797 6697.295898
v 14573.683594 18097.716797 7105.469727
v 14482.229492 18647.611328 6483.593262
v 14765.228516 18634.507812 6948.702148
v 14144.760742 19000.144531 5278.215820
v 14284.598633 18932.128906 5589.152344
v 14614.443359 19312.031250 5271.797363
v 14582.419922 19088.335938 5818.708008
v 14823.683594 19586.109375 5070.891113
v 14780.853516 19034.220703 6457.981934
v 14864.472656 18957.134766 6822.278320
v 12825.875977 20404.158203 3914.111328
v 12825.875977 20994.042969 3859.349609
v 13415.759766 20404.158203 3925.794434
v 13415.759766 20994.042969 3843.724121
v 12825.875977 21583.925781 3859.349609
v 12825.875977 22173.808594 3953.103271
v 13415.759766 21583.925781 3843.724121
v 13415.759766 22173.808594 3921.852295
v 14005.642578 20404.158203 4029.293945
v 14005.642578 20994.042969 3915.972656
v 14601.941406 20410.244141 4268.298828
v 14802.847656 20217.671875 4460.178223
v 14595.525391 20994.042969 4113.227539
v 14005.642578 21583.925781 3890.600830
v 14005.642578 22173.808594 3937.477783
v 14595.525391 21583.925781 4025.353271
v 14595.525391 22173.808594 3999.979980
v 15020.314453 19979.365234 4853.433105
v 14895.412109 18325.595703 7337.861816
v 14942.753906 18634.507812 7243.643555
v 14936.974609 19472.830078 5464.146484
v 15004.441406 19420.990234 5868.098633
v 15175.273438 19798.207031 5257.104004
v 15299.384766 19645.375000 5868.099121
v 15610.191406 20010.302734 5443.316406
v 15794.208984 19966.296875 5861.676270
v 15048.654297 19329.162109 6457.981934
v 15172.208984 19237.103516 7081.412598
v 15343.595703 19671.716797 6457.982422
v 15389.179688 19652.173828 6947.291504
v 15482.609375 19517.072266 7340.546875
v 15766.486328 19987.373047 6424.182129
v 15579.376953 19834.990234 7105.497559
v 16638.298828 18826.970703 7332.701660
v 17189.203125 18320.435547 7323.676758
v 16977.568359 18632.009766 7269.200684
v 16083.230469 20096.218750 6054.021973
v 16638.298828 19016.447266 7332.701660
v 16083.230469 20096.218750 6205.020996
v 16920.480469 19217.599609 7212.113770
v 17031.710938 19814.273438 7128.459473
v 14936.984375 20610.927734 4366.424316
v 15175.277344 20393.464844 4679.571777
v 15035.453125 20994.042969 4315.812500
v 15330.394531 20994.042969 4499.376953
v 15610.203125 20569.259766 4898.965820
v 15794.214844 20984.523438 4797.949707
v 15214.500000 21572.029297 4265.146484
v 15430.521484 21367.470703 4422.386230
v 15185.408203 22173.808594 4135.704590
v 15534.691406 21760.726562 4366.424316
v 15748.908203 21572.029297 4527.648926
v 15748.908203 22171.318359 4309.671875
v 15927.947266 21973.029297 4448.464844
v 16365.175781 21104.023438 4872.500488
v 16955.058594 21121.583984 4847.126465
v 16365.175781 21583.925781 4661.141113
v 16365.175781 22301.359375 4345.124023
v 16365.175781 22006.417969 4476.973633
v 16955.058594 21583.925781 4605.488770
v 16955.058594 22256.417969 4337.315430
v 16955.058594 21961.476562 4446.694824
v 15413.570312 20176.003906 5050.061035
v 15806.826172 20362.214844 5259.038086
v 16003.447266 20155.169922 5660.766113
v 16003.458984 20781.548828 5074.759277
v 15957.242188 20201.373047 6598.276367
v 15913.791016 20400.462891 7064.067383
v 16039.966797 20750.199219 7271.496094
v 16365.175781 20551.935547 5410.601074
v 16313.984375 20318.087891 5861.676270
v 16365.175781 20809.082031 5115.659668
v 16955.058594 20646.408203 5452.635254
v 16955.058594 20537.335938 5868.099121
v 16955.058594 20826.642578 5157.693848
v 16325.595703 20427.462891 6417.922363
v 16174.703125 20594.628906 6878.240234
v 16567.958984 20757.724609 6630.823730
v 16368.869141 20781.546875 7064.067383
v 16961.718750 20508.927734 6443.710449
v 17020.714844 20360.232422 7003.940918
v 16769.531250 20757.724609 6630.823730
v 16769.783203 20763.832031 7047.865723
v 14791.146484 17932.341797 7395.203613
v 15129.386719 18095.230469 7499.674316
v 15237.695312 18634.507812 7483.904785
v 15770.230469 17986.650391 7753.665039
v 15963.482422 17751.375000 7934.381836
v 15775.292969 18634.507812 7587.055176
v 15348.492188 19123.818359 7436.872070
v 15717.660156 19282.023438 7451.228027
v 15836.347656 19814.273438 7374.526367
v 16365.175781 18061.591797 7723.265625
v 16365.175781 17766.650391 7975.264160
v 16411.072266 18632.009766 7444.264648
v 16977.568359 18129.751953 7597.697754
v 16955.058594 17796.703125 8069.017578
v 16795.945312 18433.714844 7374.370117
v 16411.072266 19217.599609 7401.226074
v 16365.175781 19814.273438 7390.620117
v 16700.800781 19409.701172 7353.535645
v 16736.767578 19814.273438 7358.900879
v 15959.423828 20404.156250 7358.900879
v 16039.966797 20750.199219 7353.536133
v 16365.175781 20404.156250 7374.994141
v 16365.175781 20758.189453 7358.900879
v 16733.861328 20404.156250 7358.900879
v 16696.925781 20726.785156 7353.536133
v 8106.810547 14171.859375 14340.026367
v 8696.694336 14136.431641 14232.583008
v 8106.810547 14575.865234 12356.812500
v 8106.810547 14571.102539 12946.696289
v 8717.288086 14640.389648 12297.824219
v 8696.694336 14486.449219 12946.696289
v 8106.810547 14486.449219 13536.579102
v 8106.810547 14308.313477 14045.084961
v 8696.694336 14377.079102 13536.579102
v 8696.694336 14245.811523 13937.641602
v 10114.263672 13481.526367 12160.880859
v 10101.321289 13915.442383 12204.661133
v 9286.577148 14120.806641 14170.081055
v 9876.459961 14109.204102 14167.992188
v 9286.577148 14562.480469 12356.812500
v 9286.577148 14442.255859 12946.696289
v 9956.622070 14427.653320 12304.187500
v 9876.459961 14511.589844 12946.696289
v 9286.577148 14343.741211 13536.579102
v 9286.577148 14225.423828 13875.138672
v 9876.459961 14372.904297 13536.579102
v 9876.459961 14256.674805 13873.050781
v 8298.090820 13609.098633 15589.769531
v 8106.810547 14032.732422 14716.345703
v 8103.603516 13763.429688 15358.375977
v 8508.401367 13609.098633 15589.769531
v 8696.694336 13968.727539 14716.345703
v 8701.695312 13723.181641 15358.375977
v 8103.603516 13477.241211 15867.777344
v 8106.810547 13210.103516 16485.994141
v 7904.835938 13650.962891 15652.259766
v 8701.695312 13464.741211 15842.775391
v 8696.694336 13165.314453 16485.994141
v 8901.657227 13621.988281 15610.590820
v 9459.603516 13609.098633 15589.769531
v 9286.577148 13950.275391 14716.345703
v 9272.416016 13720.919922 15358.375977
v 9753.250000 13609.098633 15589.769531
v 9876.459961 13938.672852 14716.345703
v 9920.510742 13720.919922 15358.375977
v 9272.416016 13464.027344 15842.775391
v 9266.940430 13118.789062 16520.162109
v 9066.348633 13621.988281 15610.590820
v 9920.510742 13464.027344 15842.775391
v 9876.459961 13138.518555 16392.697266
v 10146.506836 13621.988281 15610.590820
v 10329.262695 13301.163086 12357.230469
v 10644.021484 13325.558594 12762.167969
v 10364.705078 13915.442383 12499.602539
v 10659.646484 13915.442383 12748.784180
v 10902.140625 13325.558594 13057.110352
v 10810.322266 13915.442383 13043.725586
v 10466.343750 14158.907227 14295.823242
v 11197.082031 13325.558594 13421.405273
v 11019.328125 13937.814453 13577.209961
v 10988.570312 14132.509766 14207.375000
v 10398.863281 14548.596680 12445.732422
v 10530.222656 14493.871094 12822.330078
v 10791.545898 14466.441406 12879.189453
v 10525.332031 14327.776367 13547.419922
v 10466.343750 14281.823242 14000.881836
v 10812.245117 14251.103516 13547.419922
v 11522.302734 13325.558594 13716.347656
v 11766.290039 13360.446289 14076.878906
v 11408.606445 13665.245117 13796.400391
v 11462.354492 13883.300781 14176.168945
v 12049.395508 13187.076172 14240.449219
v 11408.606445 14322.381836 14405.934570
v 10466.343750 14056.531250 14716.345703
v 10466.343750 13852.500977 15306.228516
v 10782.707031 14188.960938 14716.345703
v 10870.507812 14082.708008 15306.228516
v 10466.343750 13434.351562 15941.494141
v 10466.343750 13139.410156 16361.449219
v 10466.343750 13659.935547 15646.552734
v 11056.226562 13440.304688 16018.505859
v 11056.226562 13145.363281 16377.070312
v 11069.797852 13887.108398 15732.004883
v 11077.648438 14328.688477 14716.345703
v 11165.449219 14260.541992 15306.228516
v 11275.471680 14231.521484 15656.035156
v 11814.858398 13580.333008 14551.459961
v 11716.287109 13897.109375 14735.391602
v 11831.829102 14081.513672 15092.042969
v 12232.924805 13307.508789 14779.338867
v 12416.455078 13427.939453 15203.852539
v 12023.199219 13688.258789 14944.714844
v 12219.980469 13863.455078 15344.576172
v 11646.109375 13455.039062 16049.756836
v 11646.109375 13160.097656 16393.583984
v 11646.109375 13915.441406 15810.924805
v 12235.993164 13480.336914 15980.629883
v 12235.993164 13185.395508 16409.208984
v 12226.476562 13871.391602 15680.752930
v 11459.799805 14328.688477 14716.345703
v 11639.563477 14263.906250 15295.694336
v 12023.503906 14232.708984 15485.297852
v 11646.109375 14242.981445 15657.278320
v 12023.503906 14232.708984 15621.116211
v 8106.810547 13085.683594 17015.771484
v 8696.694336 13056.520508 16892.853516
v 7989.361328 13088.270508 18978.646484
v 9057.221680 13033.700195 16784.021484
v 8154.317383 13168.675781 19397.312500
v 8087.887695 13447.603516 20069.218750
v 7878.644531 13621.988281 20295.128906
v 8696.694336 13092.541992 19574.681641
v 8696.694336 13322.317383 20025.294922
v 8158.162109 13562.177734 20615.177734
v 8206.817383 13610.087891 21054.660156
v 7863.220703 13622.731445 20615.177734
v 8048.837891 13648.299805 21232.796875
v 8643.955078 13562.119141 20567.919922
v 8412.168945 13610.087891 21054.660156
v 8838.440430 13915.441406 20739.363281
v 8597.294922 13857.344727 21232.796875
v 8975.074219 14783.704102 20303.673828
v 8916.865234 15095.207031 20290.253906
v 8396.891602 15385.288086 20905.257812
v 8325.127930 15313.514648 21205.060547
v 8922.538086 14554.375977 20643.806641
v 8784.281250 14505.323242 21205.060547
v 8647.534180 15151.279297 20671.250000
v 8547.666016 15018.572266 21205.060547
v 9165.160156 13055.530273 19684.603516
v 9284.800781 13328.246094 19975.189453
v 9350.204102 13915.441406 20175.734375
v 9876.459961 13325.557617 19921.855469
v 9876.459961 13915.441406 20031.234375
v 9011.184570 13600.961914 20339.785156
v 9055.262695 13915.441406 20444.421875
v 9266.760742 14554.375977 20207.199219
v 9338.724609 15145.806641 20244.699219
v 9876.165039 14469.975586 20165.585938
v 9679.340820 14982.912109 20234.318359
v 9056.922852 14390.449219 20466.265625
v 9517.542969 15324.235352 20615.177734
v 9507.618164 15316.245117 21090.964844
v 10023.193359 14580.049805 20615.177734
v 10072.595703 14663.871094 21013.976562
v 9728.250977 15029.293945 20615.177734
v 9876.165039 15109.853516 21198.917969
v 8908.502930 15533.708008 20296.820312
v 8309.493164 15685.090820 20819.560547
v 8269.561523 15705.208984 21196.189453
v 8125.370117 16324.785156 20794.236328
v 8125.370117 16324.784180 20987.693359
v 8689.798828 15708.109375 20653.119141
v 8679.310547 15824.135742 21196.189453
v 8471.095703 16123.590820 20794.236328
v 8471.095703 16123.589844 20993.646484
v 9176.861328 15533.708008 20296.820312
v 9222.600586 15572.147461 20615.177734
v 9301.224609 15531.044922 21254.580078
v 9876.459961 15445.071289 21488.166016
v 10331.078125 13325.557617 20144.484375
v 10243.057617 13915.441406 20175.734375
v 10583.400391 13325.557617 20615.177734
v 10718.666016 13325.557617 20968.363281
v 10387.944336 13915.441406 20615.177734
v 10611.228516 13915.440430 21070.082031
v 10810.474609 13325.556641 21263.304688
v 10833.760742 13915.440430 21365.023438
v 10197.600586 14249.783203 20234.318359
v 10229.383789 14285.108398 20615.177734
v 10438.020508 14482.475586 21172.966797
v 10510.570312 15086.400391 21444.160156
v 10821.186523 14505.323242 21455.726562
v 10782.418945 14883.901367 21499.701172
v 10343.426758 15426.763672 21500.001953
v 12807.771484 13229.279297 14963.816406
v 12629.625977 13386.986328 15244.802734
v 13080.541992 13703.933594 14965.850586
v 12838.631836 13835.464844 15420.305664
v 13235.092773 13325.558594 14943.131836
v 13530.035156 13325.557617 15269.108398
v 13205.534180 13703.933594 14965.850586
v 13407.601562 13906.511719 15309.930664
v 12666.646484 13558.231445 15911.062500
v 12883.613281 13295.309570 16475.181641
v 12847.432617 13834.956055 15853.082031
v 13101.075195 13702.744141 16210.795898
v 13557.433594 13571.403320 16170.518555
v 13350.388672 13312.272461 16464.765625
v 13382.787109 13905.798828 16152.306641
v 13164.178711 13702.744141 16210.795898
v 13088.478516 14305.527344 15576.471680
v 13405.159180 14503.422852 15545.882812
v 13594.720703 14908.307617 15567.447266
v 13088.478516 14305.527344 15775.775391
v 13405.159180 14503.422852 15855.398438
v 13594.720703 14908.307617 15675.673828
v 13954.510742 13317.583008 15551.240234
v 14005.642578 13915.441406 15500.000000
v 14575.050781 13317.583008 15534.095703
v 14642.075195 13921.514648 15543.564453
v 14005.642578 13213.813477 16377.070312
v 14005.642578 13915.441406 16039.410156
v 14595.525391 13125.866211 16314.577148
v 14642.075195 13921.514648 15781.400391
v 14005.642578 14505.324219 15500.000000
v 13974.805664 15050.388672 15560.703125
v 14460.107422 14505.324219 15550.584961
v 14337.384766 14912.467773 15567.447266
v 14005.642578 14505.324219 15959.128906
v 14029.102539 15107.015625 15748.543945
v 14460.107422 14505.324219 15772.297852
v 14328.184570 15031.888672 15766.353516
v 16595.333984 15331.715820 13762.669922
v 16496.054688 15172.471680 14185.452148
v 17071.925781 14684.707031 14385.099609
v 16955.058594 15264.407227 13697.002930
v 16907.203125 14941.286133 14163.668945
v 15143.560547 13289.255859 15546.595703
v 14919.037109 13728.934570 15572.606445
v 15775.292969 13182.272461 15566.210938
v 15963.482422 14077.746094 14882.514648
v 15963.482422 14077.745117 15070.021484
v 15155.601562 13261.283203 15913.375000
v 14998.910156 13060.882812 16242.155273
v 14919.037109 13728.934570 15667.933594
v 15813.859375 13158.314453 15935.758789
v 16026.921875 13056.368164 16485.994141
v 15820.230469 14517.229492 14818.132812
v 15842.699219 14375.710938 15055.337891
v 16365.175781 13208.756836 15533.833984
v 16365.175781 14031.067383 14819.244141
v 16365.175781 14031.066406 15108.172852
v 17146.570312 13325.558594 14889.405273
v 16893.800781 13310.443359 15331.582031
v 16964.937500 13910.560547 14743.787109
v 16981.197266 13919.013672 15310.356445
v 16365.175781 13271.564453 15896.111328
v 16365.175781 13180.778320 16485.994141
v 16976.544922 13459.980469 15930.279297
v 16955.058594 13334.208008 16485.994141
v 17187.498047 13734.095703 15756.429688
v 16365.175781 14510.193359 14702.412109
v 16365.175781 14365.155273 15108.172852
v 16457.476562 15041.340820 14437.341797
v 16902.888672 14546.618164 14624.257812
v 16988.865234 14514.493164 15144.458008
v 16902.888672 14981.905273 14630.384766
v 17208.031250 14821.399414 15028.352539
v 16519.857422 15685.091797 13759.496094
v 16540.695312 15626.291016 14113.666992
v 16494.259766 16274.974609 13806.373047
v 16494.259766 16274.974609 13931.377930
v 16955.058594 15685.091797 13640.603516
v 16955.058594 15826.180664 14325.059570
v 16955.058594 16274.974609 13765.598633
v 16955.058594 16274.974609 14176.850586
v 16561.203125 16636.283203 13825.172852
v 16561.203125 16636.283203 13887.674805
v 16955.058594 16731.968750 13821.999023
v 16955.058594 16731.968750 13978.253906
v 16648.091797 15390.461914 14421.716797
v 16955.058594 15531.239258 14488.155273
v 13059.408203 13053.142578 16824.296875
v 13143.343750 13053.142578 16824.296875
v 13710.592773 13030.724609 20320.126953
v 13697.973633 13082.560547 20615.177734
v 13693.838867 13099.766602 20926.980469
v 13916.729492 13178.167969 20320.154297
v 14025.137695 13277.794922 20561.458984
v 13838.603516 13229.950195 20922.765625
v 16046.519531 13054.330078 16825.486328
v 16365.175781 13117.969727 16884.736328
v 16955.058594 13147.286133 16914.050781
v 102.937744 8202.638672 21794.943359
v 102.937744 8218.264648 22384.826172
v 438.329346 8167.679688 21794.943359
v 438.329346 8140.604980 22384.826172
v 102.937744 8218.264648 22974.708984
v 102.937744 8218.264648 23564.593750
v 438.329346 8109.353516 22974.708984
v 438.329346 8078.102539 23564.593750
v 103.171753 8249.515625 24154.476562
v 116.733154 8291.027344 24534.591797
v 438.329346 8140.604492 24154.476562
v 438.329346 8265.140625 24635.080078
v 772.406982 8276.589844 21794.943359
v 850.534668 8233.890625 22384.826172
v 928.662598 8202.638672 22974.708984
v 1059.881348 8189.238281 23591.488281
v 1340.124023 8294.580078 23806.044922
v 1028.212646 8177.184082 24154.476562
v 1028.212646 8267.804688 24627.816406
v 1348.608643 8286.095703 24154.476562
v 1340.124023 8294.580078 24524.906250
v 62.487671 8606.491211 21794.943359
v 62.487671 8606.491211 22384.826172
v 62.487671 9196.375000 21794.943359
v 62.487671 9196.375000 22384.826172
v 62.487671 8606.491211 22974.708984
v 62.487671 8606.491211 23564.593750
v 62.487671 9196.375000 22974.708984
v 62.487671 9196.375000 23564.593750
v 62.487671 9786.257812 21794.943359
v 62.487671 9786.257812 22384.826172
v 102.937744 10274.970703 21794.943359
v 102.937744 10315.316406 22384.826172
v 267.375244 10569.912109 21794.943359
v 314.242920 10610.257812 22384.826172
v 62.487671 9786.257812 22974.708984
v 62.487671 9786.257812 23564.593750
v 104.071899 10420.687500 23026.490234
v 104.071899 10391.500000 23546.130859
v 256.664185 10653.031250 22965.699219
v 395.369873 10583.824219 23660.578125
v 62.721680 8606.491211 24154.476562
v 95.034912 8560.191406 24736.474609
v 62.487671 9196.375000 24154.476562
v 62.487671 9196.375000 24744.359375
v 438.329346 8327.643555 24930.021484
v 102.937744 8669.461914 25334.242188
v 102.937744 8716.337891 25924.125000
v 62.487671 9196.375000 25334.242188
v 62.487671 9196.375000 25924.125000
v 438.329346 8421.865234 25334.242188
v 438.329346 8546.860352 25924.125000
v 62.487671 9786.257812 24154.476562
v 62.487671 9786.257812 24744.359375
v 102.937744 10234.934570 24154.476562
v 94.847778 10365.792969 24742.205078
v 715.737305 10078.931641 24340.603516
v 715.737305 10078.931641 24451.685547
v 486.797363 10278.535156 24148.175781
v 486.797363 10365.792969 24567.726562
v 62.487671 9786.257812 25334.242188
v 62.487671 9786.257812 25924.125000
v 62.487671 10376.140625 25334.242188
v 62.487671 10376.140625 25924.125000
v 102.937744 11067.968750 21794.943359
v 102.937744 11123.945312 22384.826172
v 62.487671 11555.907227 21794.943359
v 62.487671 11555.907227 22384.826172
v 267.375244 10773.027344 21794.943359
v 314.242920 10829.003906 22384.826172
v 110.624512 10931.322266 23067.015625
v 120.251831 10910.312500 23399.617188
v 62.487671 11555.907227 22974.708984
v 94.847778 11512.955078 23595.044922
v 234.008911 10747.417969 23026.490234
v 334.829346 10844.480469 23612.769531
v 170.114502 11287.692383 23811.974609
v 62.487671 12145.790039 21794.943359
v 62.487671 12145.790039 22384.826172
v 62.487671 12735.673828 21794.943359
v 46.862183 12735.673828 22384.826172
v 62.487671 12145.790039 22974.708984
v 62.487671 12145.790039 23564.593750
v 31.236572 12735.673828 22974.708984
v 46.862183 12735.673828 23564.593750
v 87.312134 10966.023438 24890.542969
v 102.937744 11599.859375 24154.476562
v 82.347290 11516.043945 24745.482422
v 482.280762 11022.603516 24154.476562
v 398.466187 10948.771484 24626.476562
v 187.339233 11304.916992 24154.476562
v 175.262939 11292.840820 24549.605469
v 31.236572 10966.023438 25334.242188
v 36.223022 10966.023438 25924.125000
v 31.236572 11555.907227 25334.242188
v 36.223022 11555.907227 25924.125000
v 62.487671 12145.790039 24154.476562
v 62.487671 12145.790039 24744.359375
v 62.487671 12735.673828 24154.476562
v 62.487671 12735.673828 24744.359375
v 62.487671 12145.790039 25334.242188
v 62.487671 12145.790039 25924.125000
v 62.487671 12735.673828 25334.242188
v 62.487671 12735.673828 25924.125000
v 968.266602 8606.491211 21794.943359
v 1153.879639 8638.858398 22417.195312
v 1191.044922 9273.523438 21780.291016
v 1255.323486 9196.375000 22322.722656
v 1340.435791 8857.064453 22635.402344
v 1571.210938 9249.271484 21836.347656
v 1538.509033 9139.056641 22441.736328
v 1223.604248 8454.978516 22974.708984
v 1277.621582 8350.529297 23412.791016
v 1395.944580 8749.920898 22974.708984
v 1454.063232 8570.890625 23591.488281
v 1690.885986 9025.429688 22974.708984
v 1745.022949 9193.609375 23623.580078
v 1224.072266 9497.670898 21920.433594
v 1277.933594 9499.789062 22248.074219
v 1343.326660 9499.789062 22060.578125
v 1343.326660 9499.789062 22248.074219
v 739.151611 10598.367188 23853.654297
v 2260.697266 8872.576172 21794.943359
v 2336.898926 8856.951172 22384.826172
v 1965.755615 8925.564453 21794.943359
v 2041.957275 8962.927734 22384.826172
v 2797.862305 8843.718750 21794.943359
v 2797.862305 8796.841797 22384.826172
v 2428.709229 8872.576172 22974.708984
v 2478.835449 8892.612305 23314.572266
v 2133.767578 9025.429688 22974.708984
v 2252.516357 9104.162109 23532.556641
v 2797.862305 8796.841797 22974.708984
v 2807.993652 8860.554688 23532.556641
v 2618.120117 8948.982422 23707.826172
v 1028.212646 8324.511719 24922.757812
v 1546.394531 8606.491211 24154.476562
v 1599.404053 8599.939453 24767.066406
v 1716.048828 9289.791992 24063.632812
v 1739.930908 9196.375000 24705.863281
v 1028.212646 8434.357422 25334.242188
v 1028.212646 8593.728516 25924.125000
v 1618.095703 8615.419922 25334.242188
v 1618.095703 8683.142578 25924.125000
v 1028.212646 9950.136719 24224.197266
v 1028.212646 9950.136719 24513.296875
v 969.604492 10386.971680 24102.642578
v 1013.343018 10373.779297 24560.632812
v 1921.186279 8871.357422 25009.226562
v 2208.000488 9359.636719 24104.453125
v 2136.326660 9279.769531 24848.765625
v 3011.375488 8892.612305 23925.277344
v 2807.993652 9040.111328 24134.933594
v 2797.862305 9228.283203 24744.359375
v 1978.752930 8834.898438 25334.242188
v 2047.870850 8821.370117 25924.125000
v 2214.315674 9195.741211 25275.255859
v 2342.812500 9131.216797 25924.125000
v 2797.862305 9233.620117 25334.242188
v 2797.862305 9242.990234 25924.125000
v 2011.387207 9568.820312 24267.732422
v 2002.740234 9549.443359 24728.417969
v 739.151611 10676.962891 23853.654297
v 792.830078 10727.662109 24154.476562
v 806.802490 10740.641602 24549.605469
v 102.937744 8731.963867 26514.009766
v 102.937744 8727.364258 27103.892578
v 62.487671 9196.375000 26514.009766
v 62.487671 9196.374023 27103.892578
v 438.329346 8578.111328 26514.009766
v 438.329346 8532.602539 27103.892578
v 102.937744 8727.364258 27693.775391
v 102.937744 8731.962891 28283.658203
v 62.487671 9196.374023 27693.775391
v 62.487671 9196.374023 28283.658203
v 438.329346 8516.976562 27693.775391
v 438.329346 8546.868164 28283.658203
v 62.487671 9786.257812 26514.009766
v 62.487671 9786.256836 27103.892578
v 62.487671 10376.140625 26514.009766
v 62.487671 10376.139648 27103.892578
v 62.487671 9786.256836 27693.775391
v 62.487671 9786.256836 28283.658203
v 62.487671 10376.139648 27693.775391
v 62.487671 10376.139648 28283.658203
v 102.937744 8763.205078 28873.541016
v 116.421143 8830.108398 29293.931641
v 62.487671 9196.374023 28873.541016
v 94.847778 9157.093750 29479.705078
v 438.329346 8620.225586 28873.541016
v 434.543945 8806.750000 29479.705078
v 235.392334 8934.279297 29687.187500
v 102.937744 9296.860352 30053.308594
v 105.106934 9401.801758 30643.191406
v 628.647949 8892.611328 29826.892578
v 434.543945 8989.028320 30035.437500
v 438.329346 9160.307617 30643.191406
v 62.487671 9786.256836 28873.541016
v 62.487671 9786.256836 29463.425781
v 62.487671 10376.139648 28873.541016
v 62.487671 10376.139648 29463.425781
v 62.487671 9786.256836 30053.308594
v 64.656860 9786.256836 30643.191406
v 62.487671 10376.139648 30053.308594
v 62.487671 10376.139648 30643.191406
v 51.848633 10966.023438 26514.009766
v 62.487671 10966.022461 27103.892578
v 43.135742 11555.907227 26514.009766
v 47.816284 11555.906250 27103.892578
v 62.487671 10966.022461 27693.775391
v 62.487671 10966.022461 28283.658203
v 49.751465 11555.906250 27693.775391
v 55.709961 11555.906250 28283.658203
v 53.774780 12145.790039 26514.009766
v 47.816284 12145.789062 27103.892578
v 62.487671 12735.673828 26514.009766
v 62.487671 12735.672852 27103.892578
v 49.751465 12145.789062 27693.775391
v 55.709961 12145.789062 28283.658203
v 62.487671 12735.672852 27693.775391
v 62.487671 12735.672852 28283.658203
v 62.487671 10966.022461 28873.541016
v 62.487671 10966.022461 29463.425781
v 62.487671 11555.906250 28873.541016
v 62.487671 11555.906250 29463.425781
v 62.487671 10966.022461 30053.308594
v 62.487671 10966.022461 30643.191406
v 62.487671 11555.906250 30053.308594
v 62.487671 11555.906250 30643.191406
v 57.735229 12145.789062 28873.541016
v 71.263550 12145.789062 29463.425781
v 57.735229 12735.672852 28873.541016
v 85.688354 12756.389648 29522.412109
v 84.143921 12145.789062 30053.308594
v 70.615479 12145.789062 30643.191406
v 95.992676 12756.389648 29994.320312
v 70.453491 12735.672852 30643.191406
v 1028.212646 8609.353516 26514.009766
v 1028.212646 8524.240234 27103.892578
v 1618.095703 8689.254883 26514.009766
v 1618.095703 8627.642578 27103.892578
v 1028.212646 8495.653320 27693.775391
v 1028.212646 8540.600586 28283.658203
v 1618.095703 8614.680664 27693.775391
v 1618.095703 8665.586914 28283.658203
v 2047.870850 8827.481445 26514.009766
v 2063.496338 8810.073242 27103.892578
v 2342.812500 9116.330078 26514.009766
v 2358.437988 9055.599609 27103.892578
v 2763.284180 9337.184570 26572.996094
v 2740.232422 9373.025391 27061.857422
v 2081.939209 8810.073242 27693.775391
v 2054.720459 8841.324219 28283.658203
v 2392.987061 9190.418945 27731.160156
v 2371.211914 9191.959961 28339.421875
v 2543.604492 9383.077148 27559.457031
v 2528.146973 9385.644531 28573.224609
v 2858.888184 9523.107422 27188.312500
v 2446.754883 9786.256836 27907.447266
v 2306.862793 9747.792969 28379.283203
v 2443.202637 10111.885742 27916.361328
v 2367.681885 10162.036133 28283.658203
v 2737.111816 9752.246094 27737.908203
v 2537.363770 10111.885742 27916.361328
v 2617.087891 10162.036133 28283.658203
v 1028.212646 8626.918945 28873.541016
v 1028.212646 8762.934570 29463.425781
v 1618.095703 8719.303711 28873.541016
v 1618.095703 8792.827148 29463.425781
v 1017.274902 8874.731445 30035.437500
v 1148.338623 8872.575195 30643.191406
v 813.355225 8913.445312 30220.148438
v 853.396973 8954.879883 30643.191406
v 1612.263184 8874.731445 30002.824219
v 1471.669189 8872.575195 30643.191406
v 1805.002686 8913.445312 30165.794922
v 1766.610596 8929.127930 30643.191406
v 2083.154541 8850.837891 28873.541016
v 2030.148193 8866.463867 29463.425781
v 2378.095947 8979.397461 28873.541016
v 2325.089600 8935.815430 29463.425781
v 2754.009766 9288.031250 28894.128906
v 2797.862305 9138.776367 29463.425781
v 1927.210693 8892.611328 29772.541016
v 2157.494629 8960.557617 30002.824219
v 2207.979004 9025.275391 30643.191406
v 2797.862305 9114.834961 30053.308594
v 2797.862305 9140.604492 30643.191406
v 2264.999756 9876.032227 28611.238281
v 2382.320557 10158.293945 28622.117188
v 2620.700684 10158.293945 28622.117188
v 3427.982910 8860.554688 21767.199219
v 3387.745117 8781.216797 22384.826172
v 3651.435547 8913.446289 21552.074219
v 3806.407227 8871.777344 21945.330078
v 3992.872559 8848.054688 22369.583984
v 3992.872559 8989.109375 21767.199219
v 4199.662598 8932.671875 22162.792969
v 3387.745117 8749.965820 22974.708984
v 3387.745117 8796.841797 23564.593750
v 3977.628418 8802.486328 22974.708984
v 3977.628418 8818.111328 23564.593750
v 4312.954102 8892.612305 22556.048828
v 4589.769043 9335.060547 21847.681641
v 4532.753418 9106.127930 22369.583984
v 4863.737793 9490.031250 22079.468750
v 4926.881836 9428.814453 22384.826172
v 4350.697754 8878.219727 22974.708984
v 4337.003418 8878.219727 23564.593750
v 4645.639648 9050.830078 22974.708984
v 4631.945312 9020.785156 23564.593750
v 5020.635254 9345.771484 22974.708984
v 5083.129395 9315.726562 23564.593750
v 4801.235352 9552.522461 21686.212891
v 5127.433594 9816.218750 21882.839844
v 5221.823242 9737.455078 22384.826172
v 5391.130371 10163.251953 21686.212891
v 5315.576660 9643.701172 22974.708984
v 5378.071289 9565.580078 23564.593750
v 3387.745117 8872.576172 24013.072266
v 3387.745117 8961.730469 24308.013672
v 3387.745117 9104.753906 24744.359375
v 3977.628418 8872.576172 23999.849609
v 3977.628418 8950.704102 24294.791016
v 3977.628418 9093.728516 24744.359375
v 3387.745117 9109.353516 25334.242188
v 3387.745117 9085.996094 25924.125000
v 3977.628418 9124.979492 25334.242188
v 3977.628418 9085.996094 25924.125000
v 4294.694824 8892.612305 23907.646484
v 4521.798340 9023.060547 24124.355469
v 4567.511719 9187.481445 24744.359375
v 5129.997070 9323.773438 24154.476562
v 5051.877441 9386.275391 24744.359375
v 4567.511719 9246.851562 25334.242188
v 4567.511719 9212.468750 25924.125000
v 5006.062500 9414.394531 25334.242188
v 5052.939453 9395.636719 25924.125000
v 5424.938965 9514.995117 24154.476562
v 5346.818848 9546.240234 24744.359375
v 5301.004395 9565.580078 25334.242188
v 5347.880859 9546.237305 25924.125000
v 5453.620605 10079.915039 22079.468750
v 5499.212891 10032.396484 22384.826172
v 5578.111816 10366.383789 21847.681641
v 5737.691895 10376.140625 22384.826172
v 5577.340820 9938.642578 22974.708984
v 5657.395020 9860.521484 23564.593750
v 5897.823730 10384.357422 22941.484375
v 5952.336426 10186.708008 23564.593750
v 6090.644531 10586.462891 23115.962891
v 6146.107910 10481.649414 23564.593750
v 5789.063477 9856.390625 24165.781250
v 5781.200684 9881.386719 24715.779297
v 6013.548828 10109.870117 23976.689453
v 6000.443359 10122.975586 24893.353516
v 6048.976562 10068.202148 24369.947266
v 6048.976562 10068.202148 24500.099609
v 6166.878906 10334.355469 24165.781250
v 6191.872070 10342.218750 24715.779297
v 5694.442871 9860.521484 25334.242188
v 5719.897461 9841.179688 25924.125000
v 5989.384277 10134.035156 25334.242188
v 6014.838867 10108.580078 25924.125000
v 6251.373535 10428.976562 25334.242188
v 6286.423340 10403.521484 25924.125000
v 5900.020020 11000.782227 21819.396484
v 5985.756836 10804.844727 22384.826172
v 5992.597656 11555.907227 21646.105469
v 6048.976562 11220.582031 22032.326172
v 6083.605957 11099.787109 22384.826172
v 6067.979980 11555.907227 21941.046875
v 6156.243164 11555.907227 22384.826172
v 6028.142090 10693.189453 22722.708984
v 6166.878906 10920.298828 22941.484375
v 6358.241211 10966.023438 23564.593750
v 6312.480957 11555.907227 22974.708984
v 6498.853516 11555.907227 23564.593750
v 6005.478027 12145.790039 21600.037109
v 5974.226562 12735.673828 21701.451172
v 6083.605957 12145.790039 21894.980469
v 6187.494141 12145.790039 22384.826172
v 6067.169922 12735.673828 21996.392578
v 6155.433105 12735.673828 22384.826172
v 6333.020996 12145.790039 22974.708984
v 6520.509766 12145.790039 23564.593750
v 6286.153320 12735.673828 22974.708984
v 6465.981934 12735.673828 23564.593750
v 6467.611328 10966.023438 24154.476562
v 6540.322266 10974.240234 24707.210938
v 6614.432617 11508.649414 24125.001953
v 6629.726562 11280.515625 24485.818359
v 6546.314941 10807.841797 25334.242188
v 6581.364258 10745.339844 25924.125000
v 6628.538086 12145.790039 23917.699219
v 6603.069336 12776.991211 24112.501953
v 6619.513672 13001.164062 24520.525391
v 6671.394531 11176.345703 24879.074219
v 6671.394531 11673.771484 24301.982422
v 6715.328125 11508.649414 24707.210938
v 6722.291992 11102.783203 25334.242188
v 6779.807617 11040.281250 25924.125000
v 6859.357422 11555.907227 25334.242188
v 7010.626953 11555.907227 25924.125000
v 6691.041016 12145.790039 24212.640625
v 6765.604492 12145.790039 24744.359375
v 6671.394531 12607.908203 24281.148438
v 6690.328125 12776.991211 24728.037109
v 6876.036133 12145.790039 25334.242188
v 7079.168945 12145.790039 25924.125000
v 6814.586914 12735.673828 25334.242188
v 7033.344727 12735.673828 25924.125000
v 3387.745117 9203.421875 26514.009766
v 3391.694824 9377.954102 27112.439453
v 3977.628418 9164.125000 26514.009766
v 3977.628418 9281.233398 27103.892578
v 3590.956055 9452.539062 27511.392578
v 3933.833496 9409.018555 27702.322266
v 4035.270020 9447.165039 28283.658203
v 3197.700195 9533.705078 27314.765625
v 3391.694824 9570.213867 27702.322266
v 3387.745117 9653.879883 28283.658203
v 3708.009277 9494.208008 27904.648438
v 3740.328613 9496.850586 28283.658203
v 4567.511719 9274.087891 26514.009766
v 4567.511719 9352.215820 27103.892578
v 5005.009766 9426.005859 26514.009766
v 4973.758301 9457.255859 27103.892578
v 4567.511719 9371.854492 27693.775391
v 4567.511719 9401.495117 28283.658203
v 5049.062988 9445.644531 27693.775391
v 5095.939453 9445.644531 28283.658203
v 5299.951172 9560.974609 26514.009766
v 5268.700195 9558.733398 27103.892578
v 5344.004395 9524.655273 27693.775391
v 5390.880859 9495.653320 28283.658203
v 3124.367188 9441.809570 29104.480469
v 3184.855957 9399.334961 29463.425781
v 4127.475586 9471.225586 28744.529297
v 3254.117676 9344.879883 30053.308594
v 3332.398926 9339.397461 30643.191406
v 3347.694824 9591.789062 28894.128906
v 3479.797363 9585.835938 29463.425781
v 3949.560059 9519.629883 28914.111328
v 3977.628418 9590.174805 29463.425781
v 3567.986816 9778.999023 30097.347656
v 3630.610840 9727.916992 30609.847656
v 3928.354004 9827.114258 30097.347656
v 4539.436035 9465.990234 28906.183594
v 5009.575684 9469.197266 28762.013672
v 4539.436035 9494.786133 29142.134766
v 4539.436035 9498.256836 29404.437500
v 5186.680176 9509.021484 28924.601562
v 5157.395020 9546.860352 29463.425781
v 4567.511719 9587.040039 30053.308594
v 4512.894043 9877.237305 30697.808594
v 4279.854492 10088.483398 30930.849609
v 5157.395020 9609.344727 30053.308594
v 5157.395020 9765.752930 30643.191406
v 5801.563965 9893.879883 26540.904297
v 5747.277832 9819.434570 27103.892578
v 6034.382812 10089.036133 26362.207031
v 6055.216797 10069.378906 26755.460938
v 6092.966797 10046.958984 27103.892578
v 6334.586914 10363.148438 26527.583984
v 6387.908203 10278.533203 27103.892578
v 5747.277832 9737.598633 27693.775391
v 5747.277832 9661.719727 28283.658203
v 6152.650391 9999.200195 27693.775391
v 6199.518066 9952.323242 28283.658203
v 6447.592285 10229.875977 27693.775391
v 6494.459961 10214.249023 28283.658203
v 6665.934570 10637.261719 26692.966797
v 6729.726562 10573.474609 27103.892578
v 6780.698242 10524.817383 27693.775391
v 6827.575195 10509.191406 28283.658203
v 5747.277832 9651.162109 28873.541016
v 5747.277832 9687.471680 29463.425781
v 6233.578613 9926.139648 28873.541016
v 6264.830078 9931.208008 29463.425781
v 6528.520508 10184.780273 28873.541016
v 6559.771484 10137.904297 29463.425781
v 5747.277832 9734.338867 30053.308594
v 5747.277832 9823.187500 30643.191406
v 6373.467285 9969.961914 30040.324219
v 6337.161133 9948.192383 30643.191406
v 6594.298828 10098.167969 29835.042969
v 6963.357422 10515.668945 28896.505859
v 6927.043945 10393.692383 29463.425781
v 7225.862305 10667.205078 29108.441406
v 7274.667969 10631.927734 29463.425781
v 6668.718750 10074.958008 30228.296875
v 6756.377930 10056.211914 30643.191406
v 6890.025391 10233.514648 30040.324219
v 7051.320312 10167.210938 30643.191406
v 7377.350586 10553.808594 30053.308594
v 7542.411133 10482.221680 30655.203125
v 6613.957031 10699.753906 26299.710938
v 6833.067383 10924.238281 26503.406250
v 7057.233398 10987.445312 27062.812500
v 7159.800781 11514.121094 26493.103516
v 7210.489258 11289.636719 26838.796875
v 7255.815430 11198.354492 27232.054688
v 7272.978516 11682.892578 26675.798828
v 7353.476562 11514.120117 27062.812500
v 7075.640625 10846.815430 27693.775391
v 7122.516602 10774.645508 28283.658203
v 7303.973633 11141.756836 27693.775391
v 7386.125977 11069.586914 28283.658203
v 7604.126953 11607.096680 27734.718750
v 7681.068359 11442.666016 28283.658203
v 7204.740234 12145.790039 26283.837891
v 7189.114258 12735.673828 26307.113281
v 7298.475586 12145.790039 26578.779297
v 7521.553711 12145.789062 27103.892578
v 7282.859375 12735.673828 26602.056641
v 7490.311523 12735.672852 27103.892578
v 7740.005859 12145.789062 27565.314453
v 7724.379883 12735.672852 27543.658203
v 7184.194336 10708.874023 28715.187500
v 7492.235352 10962.153320 28890.986328
v 7569.609375 10851.000977 29463.425781
v 7758.608398 11319.602539 28673.531250
v 7672.291992 10763.934570 30053.308594
v 7756.027344 10706.088867 30466.582031
v 119.313354 9467.456055 31003.660156
v 427.397705 9355.256836 31213.402344
v 620.965576 9428.713867 31822.957031
v 700.063721 9473.374023 32195.138672
v 96.583130 9741.504883 31213.402344
v 102.937744 9862.340820 31822.957031
v 62.487671 10376.139648 31233.074219
v 62.487671 10376.139648 31822.957031
v 223.482178 9515.041992 31396.916016
v 326.023926 9567.399414 31822.957031
v 102.937744 9956.085938 32412.839844
v 116.421143 10033.290039 32817.554688
v 62.487671 10376.139648 32412.839844
v 94.847778 10344.261719 33009.601562
v 477.393311 9641.414062 32400.197266
v 421.918945 9907.464844 33009.601562
v 214.350952 10126.381836 33210.812500
v 107.033203 10541.371094 33592.605469
v 121.881714 10649.578125 33925.699219
v 607.606445 10012.455078 33428.273438
v 421.918945 10234.639648 33611.984375
v 449.425781 10526.074219 34146.390625
v 653.450928 10612.106445 34598.917969
v 62.487671 10966.022461 31233.074219
v 62.487671 10966.022461 31822.957031
v 62.487671 11555.906250 31233.074219
v 62.487671 11555.906250 31822.957031
v 62.487671 10966.022461 32412.839844
v 62.487671 10966.021484 33002.722656
v 62.487671 11555.906250 32412.839844
v 62.487671 11555.905273 33002.722656
v 55.475952 12145.789062 31233.074219
v 55.475952 12145.789062 31822.957031
v 39.688354 12735.672852 31233.074219
v 39.850464 12735.672852 31822.957031
v 62.487671 12145.789062 32412.839844
v 62.487671 12145.788086 33002.726562
v 62.487671 12735.672852 32412.839844
v 62.487671 12735.671875 33002.726562
v 66.583130 10966.021484 33592.605469
v 98.124146 10947.811523 34146.390625
v 62.487671 11555.905273 33592.605469
v 62.487671 11555.905273 34182.488281
v 260.195435 10739.042969 34318.953125
v 102.937744 11114.843750 34772.371094
v 115.817993 11208.596680 35362.253906
v 62.487671 11555.905273 34772.371094
v 75.368042 11555.905273 35362.253906
v 449.425781 10810.219727 34786.273438
v 438.329346 11020.981445 35362.253906
v 62.487671 12145.788086 33592.609375
v 62.487671 12145.788086 34182.492188
v 62.487671 12735.671875 33592.609375
v 62.487671 12735.671875 34182.492188
v 62.487671 12145.788086 34772.375000
v 62.487671 12145.788086 35362.257812
v 62.487671 12735.671875 34772.375000
v 62.487671 12735.671875 35362.257812
v 1206.610596 8871.776367 31050.908203
v 1017.274902 9047.851562 31241.751953
v 1028.212646 9276.796875 31822.957031
v 1432.581299 8871.776367 31050.908203
v 1624.763672 8986.407227 31241.751953
v 1618.095703 9163.241211 31822.957031
v 999.301758 9409.018555 32400.197266
v 1176.655518 9431.705078 32864.792969
v 1618.095703 9265.608398 32412.839844
v 1593.239014 9384.015625 33037.937500
v 783.400146 9515.041992 32588.394531
v 999.301758 9593.549805 33037.937500
v 1380.039795 9510.095703 33258.046875
v 2207.979004 9094.790039 31233.074219
v 2207.979004 9147.616211 31822.957031
v 2797.862305 9203.106445 31233.074219
v 2797.862305 9203.106445 31822.957031
v 2207.979004 9188.218750 32412.839844
v 2207.979004 9281.970703 33002.722656
v 2807.489258 9309.604492 32442.765625
v 2634.828613 9371.386719 33002.722656
v 3002.821777 9786.256836 32650.751953
v 2815.782715 9786.255859 33002.722656
v 3009.086426 10376.139648 32631.644531
v 2837.673340 10376.138672 33002.722656
v 1773.295166 9452.538086 33437.394531
v 996.334961 9877.366211 33611.984375
v 1202.227051 10006.669922 34182.488281
v 778.455566 10116.625000 33821.527344
v 907.285400 10211.007812 34182.488281
v 1593.239014 9566.417969 33617.453125
v 1618.095703 9762.934570 34182.488281
v 1313.361084 10074.957031 34491.183594
v 1050.468750 10394.644531 34741.679688
v 1210.273926 10589.460938 35362.253906
v 1640.727783 9982.460938 34721.632812
v 1852.443359 10054.123047 35147.132812
v 1459.187988 10177.183594 34884.437500
v 1640.727783 10285.611328 35351.156250
v 2180.616211 9432.283203 33612.617188
v 2564.438477 9431.704102 33486.226562
v 2180.616211 9494.785156 33848.570312
v 2180.616211 9561.333984 34123.500000
v 2626.153809 9729.002930 33646.753906
v 2595.197754 9822.574219 34182.488281
v 2718.726074 10376.138672 33592.605469
v 2687.475098 10376.138672 34182.488281
v 2207.979004 9797.579102 34772.371094
v 2207.979004 10009.333984 35223.656250
v 2207.979004 10158.757812 35518.601562
v 2583.046387 9916.318359 34772.371094
v 2548.236816 10012.455078 35195.953125
v 2675.323730 10376.138672 34772.371094
v 2603.932129 10345.442383 35380.449219
v 1903.523438 12225.510742 32578.746094
v 1900.352051 12350.398438 32874.757812
v 1839.472900 12735.672852 32658.412109
v 1793.411621 12763.531250 33043.917969
v 2229.716064 11731.145508 32510.140625
v 2335.275635 11691.243164 32847.835938
v 2904.783691 10966.022461 32553.525391
v 2717.745117 10966.021484 33002.722656
v 2750.783691 11519.131836 32470.613281
v 2576.151855 11519.130859 33027.765625
v 2124.156738 12100.623047 32491.029297
v 2166.380371 12150.577148 33001.683594
v 2164.313965 12742.592773 32590.468750
v 2797.862305 12145.789062 32346.099609
v 2543.802734 12145.788086 33244.871094
v 2790.351562 12742.592773 32547.488281
v 787.576416 10704.552734 34992.171875
v 915.332275 10778.407227 35362.253906
v 1776.160645 12962.043945 33592.609375
v 1831.825195 12991.069336 33947.929688
v 2703.100586 10966.021484 33592.605469
v 2687.475098 10966.021484 34182.488281
v 2671.849609 11555.905273 33592.605469
v 2687.475098 11555.905273 34182.488281
v 2687.475098 10966.021484 34772.371094
v 2687.475098 10966.021484 35362.253906
v 2687.475098 11555.905273 34772.371094
v 2687.475098 11555.905273 35362.253906
v 2480.022949 12396.997070 33839.628906
v 2480.022949 12396.997070 33968.761719
v 2253.228760 12630.124023 33622.847656
v 2275.076904 12784.024414 34154.972656
v 2572.537109 12178.537109 33622.847656
v 2601.152832 12178.537109 34172.230469
v 2516.746094 12454.555664 33446.371094
v 2543.604492 12576.979492 34362.019531
v 2463.386719 12970.235352 34537.812500
v 2671.849609 12145.788086 34772.375000
v 2687.475098 12145.788086 35362.257812
v 2595.989746 12758.433594 34749.613281
v 2681.021484 12735.671875 35362.257812
v 133.594849 11257.302734 35670.949219
v 115.817993 11555.905273 35757.808594
v 438.329346 11192.970703 35767.402344
v 438.329346 11555.905273 35990.273438
v 102.937744 12145.788086 35833.195312
v 102.937744 12735.671875 35812.968750
v 438.329346 12145.788086 36082.718750
v 438.329346 12735.671875 36031.242188
v 1314.969238 10662.896484 35665.378906
v 1659.665527 10572.142578 35898.058594
v 1884.006348 10654.735352 36263.425781
v 2207.979004 10398.677734 35952.136719
v 2207.979004 10616.058594 36286.484375
v 2576.206055 10516.210938 35952.136719
v 2539.116211 10614.062500 36283.273438
v 1088.920654 10975.077148 35924.511719
v 1256.127441 11169.442383 36268.886719
v 865.170166 11555.905273 36184.605469
v 1160.111816 11555.905273 36279.789062
v 1490.750977 10776.187500 36058.636719
v 1659.665527 10970.097656 36315.660156
v 1618.095703 11555.905273 36384.496094
v 897.231445 12145.788086 36201.664062
v 1192.173096 12145.788086 36264.167969
v 1072.633789 12691.250977 36161.328125
v 1298.875732 12465.008789 36248.054688
v 1618.095703 12145.788086 36328.117188
v 1474.669434 12858.263672 36206.386719
v 1650.016602 12691.250977 36261.335938
v 2207.979004 10966.021484 36406.820312
v 2207.979004 11555.905273 36461.867188
v 2652.857422 10966.021484 35952.136719
v 2560.580078 10966.021484 36337.449219
v 2656.224121 11555.905273 35952.136719
v 2563.946777 11555.905273 36357.160156
v 2207.979004 12145.788086 36373.511719
v 2502.908203 13020.388672 36247.070312
v 2266.960205 12788.525391 36273.246094
v 2641.327637 12145.788086 35952.140625
v 2549.050293 12145.788086 36309.558594
v 2589.235352 12788.525391 36011.121094
v 2523.742676 12627.132812 36267.906250
v 3446.085938 9370.559570 31174.734375
v 3387.745117 9311.288086 31822.957031
v 3723.058594 9450.943359 31332.468750
v 3774.496094 9431.954102 31822.957031
v 3387.745117 9401.900391 32292.345703
v 3764.727539 9452.539062 32202.302734
v 3681.606934 9492.395508 30939.212891
v 3818.183105 9727.916992 31174.734375
v 3971.408691 9786.256836 31822.957031
v 4029.913086 10274.803711 31219.724609
v 4174.541016 10278.840820 31822.957031
v 3387.745117 9786.256836 32530.257812
v 3387.745117 10376.139648 32543.363281
v 3870.418945 9786.256836 32292.345703
v 4019.601562 10404.006836 32314.357422
v 4673.110352 10012.671875 31085.820312
v 4512.894043 10165.583008 31262.699219
v 4527.145508 10413.389648 31881.945312
v 5122.168457 9982.591797 31262.699219
v 5326.170898 10056.211914 31822.957031
v 4902.057129 10095.791992 31479.076172
v 5031.229004 10151.324219 31822.957031
v 4527.145508 10569.328125 32200.449219
v 5441.139160 10074.958008 32131.460938
v 5222.500977 10390.463867 32364.156250
v 5397.118652 10620.820312 32763.011719
v 5390.350098 10634.884766 34920.371094
v 5390.350098 10634.884766 35247.738281
v 3387.745117 10966.022461 32402.750000
v 3387.745117 11555.906250 32312.498047
v 3977.628418 10966.022461 32349.626953
v 3977.628418 11555.906250 32312.498047
v 3387.745117 12145.789062 32375.792969
v 3387.745117 12735.672852 32485.154297
v 3977.628418 12145.789062 32359.367188
v 3977.628418 12735.672852 32437.476562
v 4527.145508 10907.034180 32288.591797
v 4567.511719 11555.906250 32325.378906
v 5039.222168 10966.022461 32538.646484
v 5324.667480 10966.871094 32976.871094
v 5014.424316 11555.906250 32523.021484
v 5201.742188 11555.905273 33002.722656
v 4567.511719 12145.789062 32328.125000
v 4567.511719 12735.672852 32390.609375
v 5009.348145 12145.789062 32510.140625
v 5156.242676 12145.788086 33002.726562
v 4993.722656 12735.672852 32541.382812
v 5124.991699 12735.671875 33002.726562
v 5397.118652 11164.066406 33415.382812
v 5384.889648 11098.143555 34402.914062
v 5313.269043 11516.748047 33604.250000
v 5305.931152 11516.748047 34196.765625
v 5321.708008 10927.318359 34743.195312
v 5309.207520 10910.310547 35411.519531
v 5203.119629 11555.905273 34772.371094
v 5187.493652 11555.905273 35362.253906
v 5171.868164 12145.788086 33592.609375
v 5187.493652 12145.788086 34182.492188
v 5140.617188 12735.671875 33592.609375
v 5171.868164 12735.671875 34182.492188
v 5234.361328 12145.788086 34772.375000
v 5243.227539 12145.788086 35362.257812
v 5235.567871 12735.671875 34772.375000
v 5338.982422 12738.530273 35417.777344
v 5747.277832 9932.566406 31233.074219
v 5747.277832 9998.201172 31822.957031
v 6337.161133 9948.192383 31233.074219
v 6387.386230 10006.043945 31874.609375
v 6617.497070 10093.427734 32105.669922
v 5747.277832 10054.438477 32181.400391
v 5747.277832 10264.420898 32476.341797
v 5798.129883 10573.568359 32976.871094
v 6224.242188 10051.758789 32189.005859
v 6387.386230 10206.051758 32396.517578
v 6337.161133 10470.089844 33002.722656
v 6945.506836 10032.470703 31239.613281
v 6927.043945 10040.594727 31670.986328
v 7154.443359 10107.289062 31047.343750
v 6927.043945 10148.192383 31965.927734
v 7228.214844 10074.969727 31440.599609
v 7228.214844 10074.969727 31534.244141
v 7461.676758 10264.248047 31239.613281
v 7461.676758 10282.350586 31767.705078
v 6927.043945 10310.711914 32412.839844
v 6927.043945 10468.740234 33002.722656
v 7516.927734 10468.579102 32412.839844
v 7550.727539 10593.298828 33024.023438
v 6028.658203 10657.519531 33311.226562
v 6337.161133 10618.136719 33401.191406
v 5566.924316 10634.884766 34920.371094
v 5566.924316 10634.884766 35247.738281
v 6927.043945 10601.162109 33475.757812
v 7376.632812 10634.884766 33410.640625
v 5635.402832 10770.810547 33156.265625
v 7769.888672 10676.541016 33234.847656
v 5757.022949 10957.027344 33559.929688
v 5708.120605 11064.988281 34196.765625
v 5485.387695 11294.015625 33808.640625
v 5485.387695 11294.015625 34009.660156
v 6337.161133 10749.982422 33696.132812
v 6337.161133 10913.861328 34182.488281
v 5757.042480 10818.414062 34743.195312
v 5757.042480 10754.249023 35411.519531
v 6307.227539 11073.629883 34831.359375
v 6309.935059 11129.886719 35264.968750
v 6443.792969 11344.397461 35363.792969
v 5458.121094 12937.064453 35651.414062
v 6927.043945 10713.664062 33770.695312
v 6927.043945 10831.233398 34182.488281
v 7550.727539 10735.814453 33601.406250
v 7516.927734 10927.974609 34182.488281
v 6927.043945 11079.307617 34772.371094
v 6927.043945 11256.679688 35101.640625
v 6927.043945 11396.584961 35396.585938
v 7527.267578 11166.871094 34795.089844
v 7337.533203 11257.302734 35111.031250
v 7730.789062 11298.971680 35006.863281
v 7527.267578 11385.824219 35329.500000
v 5364.055664 11069.796875 35833.960938
v 5319.915039 11555.905273 35910.437500
v 5328.781250 12145.788086 35863.562500
v 5375.876465 12543.808594 35771.464844
v 5709.733398 11056.175781 35999.207031
v 5881.331055 11235.498047 36258.468750
v 5537.196777 11555.905273 36205.378906
v 5832.138672 11555.905273 36271.976562
v 6152.326172 11148.353516 35952.136719
v 6095.277344 11235.498047 36258.468750
v 6458.391113 11563.664062 35949.207031
v 6197.179199 11555.905273 36271.976562
v 5734.734375 12175.657227 36163.656250
v 5923.000000 11998.941406 36268.890625
v 5691.760254 12738.530273 35908.175781
v 6401.847656 12196.788086 36185.011719
v 6285.262207 12735.671875 36180.160156
v 6580.203125 12735.671875 36265.949219
v 6983.375000 11720.733398 35949.207031
v 7217.557617 11846.418945 36251.507812
v 7516.927734 11670.558594 35952.136719
v 7516.927734 11837.930664 36260.726562
v 6824.301758 12001.377930 36143.886719
v 6983.375000 12177.119141 36302.328125
v 6927.043945 12735.671875 36377.730469
v 7516.927734 12145.788086 36402.800781
v 7516.927734 12735.671875 36516.562500
v 46.862183 13325.556641 21794.943359
v 15.610962 13325.556641 22384.826172
v 15.610962 13915.440430 21794.943359
v -0.014526 13915.440430 22384.826172
v -0.014526 13325.556641 22974.708984
v 31.236572 13325.556641 23564.593750
v -0.014526 13915.440430 22974.708984
v 31.236572 13915.440430 23564.593750
v -0.014526 14505.323242 21794.943359
v -0.014526 14505.323242 22384.826172
v -0.014526 15095.206055 21794.943359
v -0.014526 15095.206055 22384.826172
v -0.014526 14505.323242 22974.708984
v 15.610962 14505.323242 23564.593750
v -0.014526 15095.206055 22974.708984
v -0.014526 15095.206055 23564.593750
v 62.487671 13325.556641 24154.476562
v 62.487671 13325.556641 24744.359375
v 46.862183 13915.440430 24154.476562
v 31.236572 13915.440430 24744.359375
v 62.487671 13325.556641 25334.242188
v 62.487671 13325.556641 25924.125000
v 40.084473 13915.440430 25334.242188
v 40.084473 13915.440430 25924.125000
v 15.610962 14505.323242 24154.476562
v -0.014526 14505.323242 24744.359375
v -0.014526 15095.206055 24154.476562
v -0.014526 15095.206055 24744.359375
v 8.833374 14505.323242 25334.242188
v 8.833374 14505.323242 25924.125000
v -0.014526 15095.206055 25334.242188
v -0.014526 15095.206055 25924.125000
v -0.014526 15685.089844 21794.943359
v -0.014526 15685.089844 22384.826172
v -0.014526 16274.972656 21794.943359
v -0.014526 16274.972656 22384.826172
v -0.014526 15685.089844 22974.708984
v -0.014526 15685.089844 23564.593750
v -0.014526 16274.972656 22974.708984
v -0.014526 16274.972656 23564.593750
v -0.014526 16864.855469 21794.943359
v -0.014526 16864.855469 22384.826172
v -0.014526 17454.738281 21794.943359
v -0.014526 17454.738281 22384.826172
v -0.014526 16864.855469 22974.708984
v -0.014526 16864.855469 23564.593750
v -0.014526 17454.738281 22974.708984
v -0.014526 17454.738281 23564.593750
v -0.014526 15685.089844 24154.476562
v -0.014526 15685.089844 24744.359375
v -0.014526 16274.972656 24154.476562
v -0.014526 16274.972656 24744.359375
v -0.014526 15685.089844 25334.242188
v -0.014526 15685.089844 25924.125000
v -0.014526 16274.972656 25334.242188
v -0.014526 16274.972656 25924.125000
v -0.014526 16864.855469 24154.476562
v -0.014526 16864.855469 24744.359375
v -0.014526 17454.738281 24154.476562
v -0.014526 17454.738281 24744.359375
v -0.014526 16864.855469 25334.242188
v -0.014526 16864.855469 25924.125000
v -0.014526 17454.738281 25334.242188
v -0.014526 17454.738281 25924.125000
v 62.487671 13325.556641 26514.009766
v 62.487671 13325.555664 27103.892578
v 46.862183 13915.440430 26514.009766
v 62.487671 13915.439453 27103.892578
v 62.487671 13325.555664 27693.775391
v 62.487671 13325.555664 28283.658203
v 62.487671 13915.439453 27693.775391
v 62.487671 13915.439453 28283.658203
v 31.236572 14505.323242 26514.009766
v 62.487671 14505.322266 27103.892578
v 31.236572 15095.206055 26514.009766
v 62.487671 15095.205078 27103.892578
v 62.487671 14505.322266 27693.775391
v 62.487671 14505.322266 28283.658203
v 62.487671 15095.205078 27693.775391
v 62.487671 15095.205078 28283.658203
v 62.487671 13325.555664 28873.541016
v 62.487671 13325.555664 29463.425781
v 62.487671 13915.439453 28873.541016
v 62.487671 13915.439453 29463.425781
v 62.487671 13325.555664 30053.308594
v 62.163696 13325.555664 30643.191406
v 62.487671 13915.439453 30053.308594
v 62.325684 13915.439453 30643.191406
v 62.487671 14505.322266 28873.541016
v 62.487671 14505.322266 29463.425781
v 62.487671 15095.205078 28873.541016
v 62.487671 15095.205078 29463.425781
v 62.487671 14505.322266 30053.308594
v 62.487671 14505.322266 30643.191406
v 62.487671 15095.205078 30053.308594
v 62.487671 15095.205078 30643.191406
v 31.236572 15685.089844 26514.009766
v 62.487671 15685.088867 27103.892578
v 31.236572 16274.972656 26514.009766
v 62.487671 16274.971680 27103.892578
v 62.487671 15685.088867 27693.775391
v 62.487671 15685.088867 28283.658203
v 62.487671 16274.971680 27693.775391
v 62.487671 16274.971680 28283.658203
v 31.236572 16864.855469 26514.009766
v 62.487671 16864.855469 27103.892578
v 31.236572 17454.738281 26514.009766
v 62.487671 17454.738281 27103.892578
v 62.487671 16864.855469 27693.775391
v 62.487671 16864.855469 28283.658203
v 62.487671 17454.738281 27693.775391
v 62.487671 17454.738281 28283.658203
v 62.487671 15685.088867 28873.541016
v 62.487671 15685.088867 29463.425781
v 62.487671 16274.971680 28873.541016
v 62.487671 16274.971680 29463.425781
v 62.487671 15685.088867 30053.308594
v 62.487671 15685.088867 30643.191406
v 62.487671 16274.971680 30053.308594
v 62.487671 16274.971680 30643.191406
v 62.487671 16864.855469 28873.541016
v 62.487671 16864.855469 29463.425781
v 62.487671 17454.738281 28873.541016
v 62.487671 17454.738281 29463.425781
v 62.487671 16864.853516 30053.308594
v 62.487671 16864.853516 30643.191406
v 62.487671 17454.736328 30053.308594
v 62.487671 17454.736328 30643.191406
v -0.014526 18044.621094 21794.945312
v -0.014526 18044.621094 22384.828125
v -0.014526 18634.505859 21794.945312
v -0.014526 18634.505859 22384.828125
v -0.014526 18044.621094 22974.710938
v -0.014526 18044.621094 23564.595703
v -0.014526 18634.505859 22974.710938
v -0.014526 18634.505859 23564.595703
v -0.014526 19224.388672 21794.945312
v -0.014526 19224.388672 22384.828125
v -0.014526 19814.271484 21794.945312
v -0.014526 19814.271484 22384.828125
v -0.014526 19224.388672 22974.710938
v -0.014526 19224.388672 23564.595703
v -0.014526 19814.271484 22974.710938
v -0.014526 19814.271484 23564.595703
v -0.014526 18044.621094 24154.478516
v -0.014526 18044.621094 24744.361328
v -0.014526 18634.505859 24154.478516
v -0.014526 18634.505859 24744.361328
v -0.014526 18044.621094 25334.244141
v -0.014526 18044.621094 25924.126953
v -0.014526 18634.505859 25334.244141
v -0.014526 18634.505859 25924.126953
v -0.014526 19224.388672 24154.478516
v -0.014526 19224.388672 24744.361328
v -0.014526 19814.271484 24154.478516
v -0.014526 19814.271484 24744.361328
v -0.014526 19224.388672 25334.244141
v 15.610962 19224.388672 25924.126953
v -0.014526 19814.271484 25334.244141
v 31.236572 19814.271484 25924.126953
v 66.692993 20414.501953 21809.599609
v 11.668579 20404.154297 22384.828125
v 111.164551 20752.154297 22015.996094
v 83.369751 20848.035156 22384.828125
v 266.124146 20618.029297 21622.740234
v 412.652832 20911.031250 21758.000000
v 410.001709 21139.378906 22390.662109
v -0.014526 20404.154297 22974.710938
v -0.014526 20404.154297 23564.595703
v 69.846802 21022.367188 22996.386719
v 15.610962 20994.039062 23564.595703
v 194.488892 21237.878906 22814.207031
v 87.312134 21695.847656 21794.945312
v 87.312134 21772.041016 22384.828125
v 70.620850 22217.722656 21776.025391
v 16.578613 22173.804688 22384.828125
v 392.864014 21468.738281 21735.958984
v 463.880127 21498.707031 22438.845703
v 394.415771 22438.265625 21567.978516
v 113.354736 21572.423828 23041.929688
v 102.937744 21538.173828 23487.554688
v 46.862183 22173.804688 22974.710938
v 82.347290 22122.859375 23531.134766
v 395.953125 21692.189453 23540.693359
v 719.301514 21892.832031 23165.794922
v 438.047363 21912.736328 23585.867188
v -0.014526 20404.154297 24154.478516
v -0.014526 20404.154297 24744.361328
v -0.014526 20994.039062 24154.478516
v -0.014526 20994.039062 24744.361328
v -0.014526 20404.154297 25334.244141
v 31.236572 20404.154297 25924.126953
v -0.014526 20994.039062 25334.244141
v 31.236572 20994.039062 25924.126953
v 71.686646 21453.525391 24154.478516
v 75.261841 21610.693359 24792.583984
v 87.312134 22198.511719 24154.478516
v 107.450195 22094.230469 24833.705078
v 374.254883 21770.451172 24121.888672
v 198.461426 21825.169922 24628.105469
v 425.542969 21920.359375 24168.679688
v 294.408569 21915.457031 24674.609375
v 22.379639 21583.921875 25334.244141
v 22.370728 21583.921875 25924.126953
v 83.549805 22115.064453 25334.244141
v 73.126709 22150.179688 25924.126953
v 2486.358887 20092.652344 21537.386719
v 2784.418457 19930.000000 21758.388672
v 2972.083496 20019.433594 22179.667969
v 1028.212646 20937.486328 21794.945312
v 1028.212646 21195.541016 22270.228516
v 1813.139404 20661.701172 21579.056641
v 1617.145264 20820.470703 21783.388672
v 1597.631348 21118.927734 22405.292969
v 1780.615967 21213.480469 22833.027344
v 789.472656 21696.693359 21794.945312
v 916.621826 21542.074219 22445.746094
v 818.300781 22217.382812 21763.863281
v 860.332275 22173.804688 22384.828125
v 1387.360596 21317.650391 22615.564453
v 933.331055 21612.279297 22922.783203
v 1028.212646 21650.429688 23564.595703
v 854.261230 22123.197266 22971.386719
v 934.054199 22214.560547 23564.595703
v 1597.631348 21378.082031 23007.677734
v 1618.095703 21542.570312 23564.595703
v 2248.068848 20423.412109 21754.849609
v 2424.360596 20604.910156 22384.828125
v 2009.779053 20757.722656 21972.310547
v 2129.418945 20833.912109 22384.828125
v 2578.828125 20185.121094 21930.642578
v 2784.418457 20315.369141 22379.708984
v 2498.060059 20694.236328 22749.701172
v 2227.234863 20998.802734 22987.990234
v 2377.492920 21195.533203 23564.595703
v 2789.891113 20594.296875 22957.681641
v 2981.204590 20650.001953 23422.910156
v 2587.948730 20784.125000 23142.957031
v 2789.891113 20873.814453 23597.560547
v 3030.607422 22385.722656 21987.312500
v 2968.258301 22297.332031 22384.828125
v 1956.409668 21317.650391 23226.281250
v 2082.551270 21365.478516 23564.595703
v 2968.258301 22266.082031 22974.710938
v 2987.745117 22281.707031 23564.595703
v 1028.212646 21807.890625 24087.960938
v 1027.125000 22083.152344 24242.871094
v 1157.166748 22189.869141 24685.373047
v 1583.575684 21740.494141 24199.361328
v 1757.189697 21823.212891 24584.421875
v 1363.934082 21898.400391 24425.910156
v 1583.575684 21964.033203 24766.373047
v 1255.332275 22343.742188 25334.244141
v 1224.072266 22421.869141 25924.126953
v 1618.095703 22147.773438 25334.244141
v 1618.095703 22288.404297 25924.126953
v 2488.938965 21275.982422 23899.500000
v 2782.870117 21125.365234 24119.468750
v 2920.499512 21160.572266 24744.361328
v 2981.075684 21177.251953 25334.244141
v 3053.325684 21224.128906 25924.126953
v 2258.578369 21446.675781 24119.468750
v 2185.966309 21692.738281 24766.373047
v 1974.663330 21919.234375 24977.675781
v 2576.247559 21337.500000 24292.755859
v 2625.557617 21393.003906 24744.361328
v 2995.562500 22312.958984 24154.478516
v 3030.769531 22369.664062 24744.361328
v 2368.717041 21781.689453 25334.244141
v 2468.258057 21860.554688 25924.126953
v 2073.775391 21977.835938 25334.244141
v 2173.316406 22040.339844 25924.126953
v 2686.133789 21486.748047 25334.244141
v 2758.384277 21565.613281 25924.126953
v 3021.898926 22384.236328 25334.244141
v 2935.954102 22296.279297 25924.126953
v 31.236572 18044.621094 26514.011719
v 62.487671 18044.621094 27103.894531
v 31.236572 18634.505859 26514.011719
v 62.487671 18634.505859 27103.894531
v 62.487671 18044.621094 27693.777344
v 62.487671 18044.621094 28283.660156
v 62.487671 18634.505859 27693.777344
v 62.487671 18634.505859 28283.660156
v 46.862183 19224.388672 26514.011719
v 46.862183 19224.388672 27103.894531
v 62.487671 19814.271484 26514.011719
v 31.236572 19814.271484 27103.894531
v 46.862183 19224.388672 27693.777344
v 62.487671 19224.388672 28283.660156
v 31.236572 19814.271484 27693.777344
v 62.487671 19814.271484 28283.660156
v 62.487671 18044.621094 28873.542969
v 62.487671 18044.621094 29463.427734
v 62.487671 18634.505859 28873.542969
v 62.487671 18634.505859 29463.427734
v 62.487671 18044.619141 30053.310547
v 62.487671 18044.619141 30643.193359
v 62.487671 18634.503906 30053.310547
v 62.487671 18634.503906 30643.193359
v 62.487671 19224.388672 28873.542969
v 62.487671 19224.388672 29463.427734
v 62.487671 19814.271484 28873.542969
v 62.487671 19814.271484 29463.427734
v 62.487671 19224.386719 30053.310547
v 62.487671 19224.386719 30643.193359
v 62.487671 19814.269531 30053.310547
v 62.487671 19814.269531 30643.193359
v 46.862183 20404.154297 26514.011719
v 15.610962 20404.154297 27103.894531
v 31.236572 20994.039062 26514.011719
v -0.014526 20994.039062 27103.894531
v 31.236572 20404.154297 27693.777344
v 62.487671 20404.154297 28283.660156
v 31.236572 20994.039062 27693.777344
v 62.487671 20994.039062 28283.660156
v 22.370728 21583.921875 26514.011719
v 15.610962 21583.921875 27103.894531
v 59.074585 22167.720703 26455.023438
v 46.862183 22173.804688 27103.894531
v 46.862183 21583.921875 27693.777344
v 62.487671 21583.921875 28283.660156
v 62.487671 22173.804688 27693.777344
v 62.487671 22173.804688 28283.660156
v 62.487671 20404.154297 28873.542969
v 62.487671 20404.154297 29463.427734
v 62.487671 20994.039062 28873.542969
v 62.487671 20994.039062 29463.427734
v 62.487671 20404.152344 30053.310547
v 62.487671 20404.152344 30643.193359
v 62.487671 20994.037109 30053.310547
v 62.487671 20994.037109 30643.193359
v 62.487671 21583.921875 28873.542969
v 62.487671 21583.921875 29463.427734
v 46.862183 22173.804688 28873.542969
v 31.236572 22173.804688 29463.427734
v 62.487671 21583.919922 30053.310547
v 46.862183 21583.919922 30643.193359
v 31.236572 22173.802734 30053.310547
v 15.610962 22173.802734 30643.193359
v 1246.676514 22458.328125 26285.021484
v 1638.218018 22404.177734 26494.593750
v 1848.260986 22444.466797 26979.076172
v 3082.698730 21265.876953 26273.316406
v 2500.640137 21877.566406 26231.660156
v 2265.599121 22092.630859 26462.576172
v 2160.126465 22316.083984 27146.978516
v 2822.920410 21613.386719 26449.115234
v 2925.404785 21705.509766 27103.894531
v 2311.129395 22359.367188 27693.777344
v 2425.266602 22416.662109 28087.218750
v 3016.340820 21783.632812 27693.777344
v 3077.645996 21846.626953 28024.710938
v 2721.399414 22064.425781 27693.777344
v 2818.519043 22204.564453 28252.591797
v 2941.039551 22383.039062 28873.542969
v 3030.607422 22437.494141 29257.853516
v 5401.085449 14649.536133 21794.943359
v 5447.379883 14787.675781 22123.308594
v 5209.222168 15095.206055 21794.943359
v 5330.341797 15060.685547 22345.892578
v 5451.448242 14799.376953 23199.707031
v 5451.448242 14799.376953 23451.480469
v 5359.267090 15060.685547 22991.732422
v 5387.292480 15045.095703 23614.703125
v 5426.545898 15208.317383 23999.697266
v 5426.545898 15337.066406 25581.158203
v 5426.545898 15337.066406 25731.949219
v 4994.271484 15685.089844 21794.943359
v 5068.609863 15685.089844 22384.826172
v 5091.988281 16162.935547 21696.628906
v 5173.905762 16272.481445 22435.830078
v 5141.742188 15685.089844 22974.708984
v 5254.901855 15685.089844 23564.593750
v 5062.489258 16274.972656 22974.708984
v 5185.630859 16274.972656 23564.593750
v 4824.961914 17673.195312 22561.615234
v 5301.553223 16643.242188 22666.458984
v 5426.641602 17703.152344 21541.658203
v 5157.395020 17600.570312 22511.316406
v 4698.720703 17545.621094 22994.404297
v 4796.509277 17658.742188 23514.173828
v 5141.541504 16901.519531 22969.392578
v 5096.791992 16864.855469 23564.593750
v 5074.862793 17287.832031 22969.392578
v 4933.898926 17422.789062 23514.173828
v 5370.032227 15645.096680 24179.583984
v 5383.605957 15763.820312 24744.359375
v 5218.889160 16274.972656 24154.476562
v 5219.933594 16274.972656 24744.359375
v 5476.008789 15716.430664 25392.808594
v 5432.993652 15677.114258 25805.880859
v 5350.347656 16274.972656 25235.187500
v 4845.891602 17733.119141 23985.414062
v 5107.502930 16864.855469 24154.476562
v 5032.363281 16864.855469 24744.359375
v 4947.414551 17503.791016 24171.015625
v 4910.410156 17454.738281 24744.359375
v 5250.705566 16901.406250 25332.867188
v 5389.415527 17103.703125 25924.125000
v 5055.958984 17454.738281 25334.242188
v 5194.492188 17454.738281 25924.125000
v 5905.269531 13269.973633 21850.527344
v 5989.852539 13450.300781 22384.826172
v 5683.993164 13915.440430 21794.943359
v 5854.757812 13915.440430 22384.826172
v 6047.896484 13036.291016 22084.207031
v 6082.795898 13155.358398 22384.826172
v 6028.142090 13584.518555 22757.427734
v 5957.719238 13873.898438 22962.318359
v 5915.900879 13974.683594 23564.593750
v 6130.277344 13362.958008 22962.318359
v 6260.186523 13325.556641 23564.593750
v 6050.464844 13649.577148 23150.683594
v 6070.213379 13679.742188 23564.593750
v 5518.430176 14354.593750 21794.943359
v 5602.240723 14556.757812 22345.892578
v 5965.640137 15266.847656 21685.791016
v 5489.048340 14841.044922 22516.564453
v 6494.020020 14681.372070 21794.943359
v 6571.292969 14741.831055 22204.064453
v 6171.760742 15080.213867 21847.429688
v 6405.272949 15062.233398 22394.345703
v 5634.262695 14563.778320 22991.732422
v 5596.113281 14563.778320 23614.703125
v 5489.048340 14841.044922 22806.453125
v 5467.133789 14815.062500 23844.736328
v 6489.042480 15207.124023 22974.708984
v 6568.724609 15299.382812 23374.685547
v 7728.736328 14057.114258 21562.492188
v 7767.920898 14202.749023 23836.214844
v 6927.043945 14546.853516 21794.943359
v 6894.072266 14708.880859 22394.345703
v 6675.462891 14843.625977 22597.320312
v 7498.825195 14513.958008 21790.371094
v 7308.000000 14729.859375 22384.826172
v 7652.870117 15095.206055 21963.169922
v 7509.494141 15095.206055 22384.826172
v 7038.961914 14736.862305 22974.708984
v 7101.463867 14703.996094 23564.593750
v 6744.019531 14912.181641 22974.708984
v 6782.712891 15099.736328 23568.625000
v 7354.875000 14736.862305 22974.708984
v 7549.666992 14539.458008 23572.525391
v 7644.848633 15097.107422 23004.642578
v 7724.667969 14901.746094 23308.833984
v 5934.505859 14040.165039 24154.476562
v 6003.647949 14130.141602 24529.644531
v 6376.405762 13325.556641 24154.476562
v 6505.456543 13284.015625 24728.037109
v 6115.973633 13745.223633 24154.476562
v 6191.418457 13926.284180 24733.509766
v 6560.984375 13452.950195 25235.412109
v 6460.286133 13856.760742 25392.921875
v 6538.961426 13993.289062 25924.125000
v 5709.447266 14505.323242 24154.476562
v 5924.984375 14528.667969 24733.509766
v 5517.769531 15045.095703 24179.583984
v 5669.104980 15095.206055 24744.359375
v 6096.117188 14347.603516 24922.900391
v 6013.071289 14758.615234 25310.898438
v 6032.210449 14790.255859 25741.958984
v 5741.343750 15068.666016 25339.933594
v 5791.880371 15089.757812 25933.583984
v 6149.027832 14522.662109 25310.898438
v 6222.655273 14558.305664 25932.802734
v 6073.878418 14842.448242 26135.214844
v 6650.560547 13059.693359 24913.781250
v 7726.459961 14167.833984 24154.476562
v 7741.938477 14161.285156 24598.699219
v 6692.905273 13284.015625 25392.921875
v 6879.322266 13325.556641 25924.125000
v 6632.620117 13621.014648 25628.667969
v 6694.327148 13698.347656 25924.125000
v 7148.340820 14695.373047 24154.476562
v 7193.722656 14751.167969 24577.867188
v 6927.962891 15095.206055 24154.476562
v 7116.228516 15064.625000 24762.439453
v 7431.517578 14400.431641 24154.476562
v 7495.217773 14497.894531 24784.910156
v 7248.496094 14847.609375 24971.121094
v 7189.654297 15240.864258 25100.195312
v 7641.751953 14637.875977 25234.322266
v 7455.542969 15023.402344 25363.884766
v 7680.646484 15227.672852 25924.125000
v 5830.331055 15632.602539 21847.429688
v 5944.172852 15803.865234 22384.826172
v 5539.852051 16083.172852 21794.943359
v 5617.837891 16272.481445 22435.830078
v 6048.976562 15400.985352 22079.048828
v 6099.231445 15508.923828 22384.826172
v 6013.956543 15930.934570 22752.267578
v 5883.533691 16274.972656 22871.630859
v 6205.279785 15714.619141 22959.220703
v 6491.228027 15646.644531 23568.625000
v 6119.771484 16274.972656 23166.572266
v 6431.764160 16311.991211 23601.605469
v 5465.645996 16643.242188 22666.458984
v 5729.837402 17596.886719 21760.949219
v 5729.837402 17551.410156 22379.943359
v 6271.094727 17593.585938 21794.943359
v 6382.223145 17599.863281 22359.343750
v 5696.275391 16849.863281 22970.822266
v 5747.277832 17284.945312 22906.095703
v 6133.389648 16864.855469 23254.755859
v 6428.331543 16864.855469 23424.691406
v 6330.623047 17334.976562 23029.765625
v 6522.892090 17204.140625 23316.373047
v 7749.571289 15560.684570 21992.566406
v 7699.732422 15728.422852 22341.492188
v 7749.571289 16090.850586 22509.230469
v 6650.560547 15424.387695 23767.941406
v 6647.896484 16533.298828 23822.908203
v 7728.722656 15735.689453 23004.642578
v 7754.659180 16146.259766 22974.708984
v 6689.564453 17708.109375 22538.982422
v 6673.416992 16864.855469 23719.632812
v 6902.533203 17565.328125 22961.664062
v 6891.631836 17282.468750 23533.636719
v 7307.999023 17636.281250 23149.589844
v 7367.755859 17574.820312 23564.593750
v 5468.213867 15421.807617 24392.953125
v 5491.778320 15468.878906 24744.359375
v 6588.058594 15817.642578 23950.396484
v 6588.058594 16140.043945 23950.396484
v 5520.461426 15778.086914 25943.611328
v 5519.096191 16274.972656 25530.128906
v 5556.113281 16215.984375 25944.833984
v 5530.716309 16729.144531 25528.578125
v 5554.280762 16808.761719 25924.125000
v 6755.213867 15646.644531 24150.005859
v 7078.669922 15709.601562 24756.371094
v 6818.500977 16311.991211 24150.005859
v 7148.196289 16274.972656 24543.810547
v 7231.322266 15922.569336 24961.003906
v 7533.139648 16391.474609 24715.808594
v 7189.654297 15529.314453 25100.195312
v 7282.605469 15709.601562 25311.789062
v 7615.523438 15722.944336 25905.908203
v 7592.601562 16306.511719 25303.279297
v 7659.589844 16130.910156 25697.134766
v 7014.569336 16821.392578 24179.117188
v 7214.460938 16595.789062 24456.943359
v 7064.650391 17236.677734 23998.916016
v 7572.535156 16859.000000 24144.546875
v 7580.330078 16592.027344 24701.041016
v 7522.947266 17441.878906 24006.062500
v 7785.994141 16588.263672 25086.009766
v 5350.194336 17026.457031 26514.009766
v 5364.055664 17019.406250 26993.361328
v 5138.763184 17454.738281 26514.009766
v 5305.218262 17403.082031 27155.550781
v 5426.545898 17565.269531 27520.742188
v 6575.937500 14117.240234 26514.009766
v 6608.892578 14179.539062 26903.470703
v 5944.805664 15235.705078 26415.167969
v 6341.058594 14505.323242 26514.009766
v 6455.159668 14482.597656 27101.617188
v 6090.586914 15061.528320 26572.681641
v 6185.729980 15095.205078 27103.892578
v 6508.610352 14664.074219 27472.521484
v 6443.957031 15095.205078 27594.333984
v 7102.180664 13327.839844 26511.726562
v 7168.820312 13525.989258 26945.140625
v 6801.536133 13822.298828 26514.009766
v 6941.097656 13919.819336 27120.933594
v 7252.157227 13132.733398 26706.833984
v 7331.945312 13327.838867 27126.617188
v 7261.584961 13660.101562 27338.394531
v 7106.630859 14053.356445 27527.376953
v 7655.394531 13345.811523 27717.394531
v 7791.239258 13555.943359 28013.103516
v 7392.186523 13880.212891 27711.914062
v 7705.399414 13932.468750 28239.302734
v 6713.375000 14270.818359 27296.726562
v 7786.186523 15364.464844 26400.884766
v 6962.087891 14529.948242 27696.576172
v 7210.800781 14789.079102 27999.902344
v 6778.421875 15095.205078 27889.275391
v 7071.382812 15122.489258 28231.380859
v 7290.056641 14395.823242 27920.634766
v 7435.170898 14557.599609 28231.380859
v 7340.858398 14944.049805 28393.156250
v 7783.606445 14140.449219 28739.691406
v 7169.144531 15337.305664 28631.441406
v 7735.879883 14500.576172 28911.208984
v 7791.239258 14694.041016 29195.449219
v 7472.671875 15122.489258 28846.257812
v 7741.130859 15095.205078 29259.597656
v 5848.188965 15626.417969 26572.681641
v 5963.587891 15770.839844 27103.892578
v 5662.255371 16274.972656 26514.009766
v 5815.604004 16274.971680 27103.892578
v 6042.748047 15390.675781 26808.421875
v 6094.560059 15475.898438 27103.892578
v 5993.122559 15897.208984 27515.773438
v 5963.587891 16274.971680 27571.119141
v 6287.271973 15648.502930 27747.419922
v 6463.065918 15793.050781 28013.306641
v 6080.788574 16274.971680 27866.062500
v 6430.194336 16355.091797 28220.353516
v 5536.791992 16731.515625 26514.009766
v 5577.232910 16839.609375 27155.550781
v 5464.553223 17172.015625 27386.617188
v 5862.102539 16864.855469 27613.009766
v 5692.432617 17410.316406 27742.812500
v 5893.425781 17616.527344 28283.658203
v 6065.163086 16864.855469 27907.951172
v 6384.649902 16864.855469 28258.593750
v 6048.976562 17255.363281 27964.882812
v 6240.074219 17289.228516 28285.314453
v 7796.459961 15613.852539 26510.949219
v 7801.382812 15833.180664 27234.917969
v 7797.887695 16140.461914 27376.908203
v 6641.751953 15399.795898 27979.068359
v 6810.241211 15631.889648 28239.423828
v 6729.254883 16312.127930 28384.656250
v 7797.887695 15966.048828 27529.861328
v 7890.411133 16268.838867 27679.175781
v 7749.571289 16397.218750 28182.248047
v 7729.943359 16864.855469 27840.265625
v 7692.711914 16807.724609 28340.789062
v 7732.688477 17451.994141 27960.435547
v 7563.789062 17579.574219 28209.119141
v 6570.116211 16533.527344 28615.000000
v 5965.736328 17673.207031 28733.044922
v 6519.368164 16877.953125 28836.392578
v 6576.453125 17083.312500 29302.189453
v 6240.440918 17467.841797 28907.218750
v 6506.356934 17501.537109 29484.660156
v 6611.785156 17729.363281 29778.683594
v 7151.670898 15737.366211 28846.257812
v 7210.800781 15968.845703 29179.669922
v 6852.271484 16355.091797 28793.427734
v 7135.856445 16274.971680 29268.367188
v 7344.926758 15575.588867 29024.695312
v 7531.136719 15720.132812 29417.962891
v 7517.923828 16371.941406 29436.007812
v 7717.347656 15864.674805 29915.388672
v 7822.598633 16283.012695 30075.119141
v 7749.672852 16419.353516 30643.191406
v 6715.675781 16660.023438 28900.841797
v 6921.709961 16878.855469 29492.958984
v 6725.087891 17336.107422 29695.443359
v 7682.003906 16839.812500 28932.529297
v 7629.698242 17438.667969 28823.951172
v 7784.902344 17231.324219 29216.285156
v 7142.552734 17088.986328 30053.308594
v 7219.717773 17157.527344 30380.267578
v 6860.236328 17501.535156 30006.509766
v 7142.471680 17454.736328 30465.693359
v 7538.537109 16835.228516 30044.257812
v 7469.446289 16922.482422 30603.414062
v 7336.810547 17454.736328 30760.634766
v 3642.614746 18871.216797 21558.222656
v 4151.850098 18247.203125 21571.517578
v 3961.073242 18649.195312 21761.498047
v 4169.617676 18810.869141 22384.828125
v 4244.318848 18880.361328 22749.689453
v 3508.302246 19235.945312 21770.888672
v 3624.465332 19440.277344 22141.660156
v 3199.818848 19602.673828 21794.945312
v 3448.673340 19859.419922 22357.292969
v 3770.295410 19047.023438 21951.478516
v 3887.237793 19235.945312 22356.904297
v 3767.619629 19699.408203 22534.916016
v 3628.537598 20050.150391 22974.710938
v 3599.212402 20005.199219 23564.595703
v 4134.085449 19187.492188 22957.675781
v 4105.027344 19263.992188 23564.595703
v 3825.711426 19755.207031 22974.710938
v 3810.085449 19710.257812 23564.595703
v 4579.068848 18241.230469 21716.300781
v 4741.157227 18103.609375 22479.943359
v 4579.068848 18421.708984 21952.251953
v 4583.491211 18481.789062 22375.695312
v 5225.457031 18089.765625 21763.632812
v 5195.496582 18082.720703 22298.095703
v 5024.270996 18388.865234 21985.609375
v 5024.270996 18388.865234 22268.248047
v 4583.540527 17985.632812 23012.753906
v 4717.949219 17985.632812 23514.175781
v 4448.174316 18664.042969 22957.675781
v 4508.905762 18634.505859 23564.595703
v 4851.051758 20097.812500 22629.275391
v 5320.947754 19993.435547 21794.945312
v 5136.087891 19959.748047 22413.519531
v 4309.377441 18966.265625 23142.945312
v 4312.164062 18969.050781 23564.595703
v 4851.051758 20097.812500 22714.574219
v 5129.067383 19968.203125 22936.607422
v 5280.923340 20000.140625 23564.595703
v 4171.280273 18765.462891 24896.343750
v 4147.142578 18724.695312 25334.244141
v 4217.466309 18797.169922 25924.126953
v 3663.449219 19465.085938 24965.291016
v 3627.037109 20032.728516 24045.339844
v 3632.317871 19814.271484 24885.351562
v 4112.837402 19295.244141 24154.478516
v 3985.073242 19236.509766 24734.189453
v 3791.811523 19827.371094 24206.970703
v 3771.019043 19814.271484 24590.410156
v 3663.449219 19465.085938 25107.937500
v 3632.317871 19814.271484 25232.056641
v 3658.396484 20074.398438 26132.060547
v 3869.257812 19250.830078 25316.435547
v 4076.338379 19224.388672 25924.126953
v 3751.525879 19814.271484 25526.998047
v 3809.849609 19852.371094 25930.910156
v 4764.609863 18025.699219 24171.017578
v 4720.347168 18134.955078 24744.361328
v 4495.215332 18634.505859 24154.478516
v 4415.316895 18595.101562 24717.574219
v 4870.698242 17816.455078 24378.669922
v 4871.769043 17840.013672 24744.359375
v 4705.774414 18167.259766 25334.244141
v 4746.854492 18200.445312 25924.126953
v 4410.833008 18429.753906 25334.244141
v 4451.913086 18502.228516 25924.126953
v 4931.220215 17872.318359 25334.242188
v 4962.471191 17905.503906 25924.125000
v 4310.156738 19000.300781 24154.478516
v 4306.701660 19007.933594 24503.089844
v 5369.312012 20062.697266 23989.390625
v 5348.478027 20013.072266 24880.660156
v 5296.548828 19959.203125 25334.244141
v 5359.041992 20015.910156 25924.126953
v 3272.881836 20185.132812 22572.921875
v 4202.542969 21196.822266 21997.728516
v 4112.831055 21081.392578 22384.828125
v 3333.595703 20276.802734 22974.710938
v 3268.414551 20433.685547 23597.560547
v 3103.532715 20721.634766 23816.164062
v 4040.580566 21036.451172 22974.710938
v 4023.028809 21065.775391 23564.595703
v 3590.523926 21807.527344 21956.050781
v 3504.419434 21716.216797 22384.828125
v 3383.484863 22163.693359 21775.052734
v 3209.478027 22002.390625 22384.828125
v 3974.016113 21590.072266 21780.263672
v 3817.889648 21421.275391 22384.828125
v 3745.488770 21941.666016 21562.794922
v 3453.686035 21644.947266 22974.710938
v 3453.686035 21629.322266 23564.595703
v 3158.744141 21971.140625 22974.710938
v 3158.744141 21986.765625 23564.595703
v 3745.639160 21350.005859 22974.710938
v 3728.087402 21334.380859 23564.595703
v 4737.748535 20544.437500 21893.558594
v 4670.014160 20370.347656 22413.519531
v 4543.059082 20948.109375 21749.015625
v 4335.513184 20786.451172 22384.828125
v 4993.476074 20370.347656 21736.138672
v 4925.255371 20151.181641 22236.019531
v 4862.752930 20699.396484 21500.302734
v 4645.014648 20367.257812 22936.607422
v 4644.146973 20497.484375 23564.595703
v 4304.264160 20741.509766 22974.710938
v 4349.205566 20770.833984 23564.595703
v 4913.554199 20146.033203 23107.828125
v 4985.981445 20202.542969 23564.595703
v 4348.369629 21372.615234 21604.474609
v 3476.220703 20349.279297 24206.970703
v 3518.358887 20349.279297 24724.595703
v 3171.399414 20799.267578 24154.478516
v 3218.276367 20865.630859 24744.361328
v 3684.282715 20116.066406 24438.593750
v 3684.282715 20116.066406 24514.791016
v 4054.280273 21101.941406 24154.478516
v 4126.530273 21138.988281 24744.361328
v 3503.532715 20350.121094 25388.279297
v 3517.710938 20350.121094 25930.910156
v 3199.743652 20882.310547 25334.244141
v 3199.743652 20929.187500 25924.126953
v 3689.539551 20117.470703 25620.929688
v 3689.539551 20117.470703 25738.806641
v 4142.155762 21108.791016 25334.244141
v 4132.408203 21110.888672 25924.126953
v 3483.001953 21647.923828 24154.478516
v 3545.495117 21735.873047 24744.361328
v 3188.060059 22018.017578 24154.478516
v 3250.553711 22074.722656 24744.361328
v 3759.338379 21352.982422 24154.478516
v 3831.588867 21440.931641 24744.361328
v 3588.330566 21794.335938 25334.244141
v 3510.211426 21737.628906 25924.126953
v 3293.388672 22089.294922 25334.244141
v 3215.270020 22001.337891 25924.126953
v 3847.214355 21499.394531 25334.244141
v 3837.466309 21442.687500 25924.126953
v 4706.647461 20573.673828 24154.478516
v 4722.272949 20577.535156 24744.361328
v 4411.706055 20807.000000 24154.478516
v 4427.331543 20844.046875 24744.361328
v 5166.568359 20245.007812 24173.402344
v 5154.067871 20248.097656 24708.164062
v 4691.021973 20543.308594 25334.244141
v 4698.916016 20571.427734 25924.126953
v 4396.080566 20813.849609 25334.244141
v 4403.974121 20815.945312 25924.126953
v 5001.607422 20248.367188 25334.244141
v 5064.100586 20276.486328 25924.126953
v 5521.583008 17911.492188 21934.914062
v 5521.583008 17911.492188 22180.062500
v 6558.237793 18044.140625 21781.960938
v 6608.892578 17847.191406 22145.726562
v 6597.083008 18395.416016 21576.679688
v 6614.136719 18911.480469 22661.804688
v 6614.136719 18911.480469 22786.208984
v 5948.928711 19467.855469 21794.945312
v 5886.426270 19410.417969 22384.828125
v 5653.986816 19698.492188 21794.945312
v 5591.484863 19635.992188 22384.828125
v 6337.161133 19270.679688 21794.945312
v 6385.370117 19104.878906 22433.037109
v 5922.591797 19426.044922 22974.710938
v 5986.578125 19477.974609 23366.951172
v 5627.650391 19646.558594 22974.710938
v 5772.881836 19689.152344 23563.984375
v 6385.370117 19104.878906 22979.585938
v 6312.770508 19358.687500 23563.984375
v 6099.881836 19554.542969 23760.205078
v 6692.228516 18240.445312 21969.933594
v 6787.191406 18044.140625 22359.345703
v 6935.037109 18638.267578 21821.630859
v 6844.207031 18682.714844 22433.037109
v 7270.304688 18881.117188 21673.326172
v 7075.811523 18044.621094 22778.996094
v 6920.161133 18688.175781 22957.484375
v 7067.326172 18858.125000 23385.416016
v 7355.991211 18044.621094 23073.937500
v 7630.151367 18094.984375 23589.171875
v 7314.647461 18464.869141 23128.759766
v 7552.943359 18680.337891 23593.800781
v 6959.547852 19046.769531 21839.949219
v 6784.589844 18973.791016 22268.548828
v 7270.304688 18994.625000 21673.326172
v 6674.071289 18952.957031 23179.464844
v 6893.237305 19103.093750 23575.064453
v 7397.983398 19051.980469 23778.671875
v 5980.025391 19485.703125 24984.837891
v 5688.469727 19916.660156 24173.402344
v 5716.331055 19808.019531 24736.121094
v 6493.137207 19466.068359 23954.468750
v 6337.161133 19411.148438 24857.011719
v 6312.770508 19595.457031 24152.449219
v 6337.161133 19588.082031 24562.070312
v 5918.730469 19432.894531 25334.244141
v 5957.875488 19450.617188 25924.126953
v 5623.789062 19664.261719 25334.244141
v 5662.934082 19720.968750 25924.126953
v 6337.161133 19204.468750 25334.244141
v 6337.161133 19165.800781 25924.126953
v 7220.893555 18928.355469 25038.210938
v 7723.587891 17931.929688 23926.980469
v 7791.239258 18895.808594 24031.154297
v 7516.927734 18915.009766 24968.160156
v 7088.493164 18913.957031 25334.244141
v 6957.692383 18884.802734 25924.126953
v 7516.927734 18886.718750 25334.244141
v 7516.927734 18841.941406 25924.126953
v 6872.878906 19399.164062 24152.449219
v 6930.516602 19230.935547 24747.833984
v 6640.139648 19527.363281 24347.724609
v 6640.139648 19527.363281 24457.457031
v 7563.538086 19126.416016 24198.460938
v 7516.927734 19083.757812 24673.218750
v 6793.551758 18995.964844 25334.244141
v 6662.750977 18939.574219 25924.126953
v 5452.636230 20109.513672 24382.644531
v 5452.636230 20109.513672 24487.404297
v 4265.045410 18862.097656 26296.726562
v 3658.396484 20074.398438 26305.853516
v 4188.785156 19187.492188 26501.617188
v 4220.359375 19363.703125 27103.894531
v 3852.828125 19852.371094 26507.093750
v 3994.256348 19814.271484 27103.894531
v 4258.596680 19471.636719 27467.353516
v 4145.806641 19784.394531 27675.898438
v 4202.723145 19965.179688 28283.660156
v 4777.052734 18214.136719 26514.011719
v 4815.072266 18274.865234 27103.894531
v 4448.188477 18653.082031 26501.617188
v 4592.921387 18634.505859 27103.894531
v 4945.963867 17919.195312 26514.009766
v 5039.708008 17979.923828 27103.892578
v 4845.795410 18321.826172 27479.062500
v 4765.297363 18634.505859 27604.156250
v 5165.543457 18054.156250 27696.531250
v 5305.502441 18131.085938 28283.660156
v 4896.341797 18634.505859 27899.097656
v 5094.143066 18634.505859 28283.660156
v 4285.879395 18966.265625 26689.980469
v 4345.360352 19068.761719 27103.894531
v 5431.802734 20088.679688 26249.914062
v 4524.913086 19202.089844 27726.488281
v 4659.948242 19298.384766 28283.660156
v 4300.256836 19567.851562 27860.609375
v 4365.006348 19670.238281 28283.660156
v 4865.549316 18932.542969 27985.623047
v 4946.035645 19003.443359 28283.660156
v 4249.467773 20065.277344 28658.830078
v 5411.097168 18221.412109 28661.517578
v 5348.261719 18663.324219 28864.304688
v 5408.398438 18879.162109 29242.281250
v 4761.387207 19418.267578 28700.501953
v 4554.338379 19829.664062 28876.294922
v 4740.544922 19987.304688 29253.982422
v 5051.411621 19222.738281 28887.695312
v 5312.332520 19224.388672 29341.671875
v 4916.346680 19594.050781 29093.757812
v 5144.228027 19790.675781 29486.421875
v 5372.108398 19987.304688 29859.441406
v 3545.030273 20374.279297 26507.093750
v 3606.953125 20570.681641 27103.894531
v 3224.612793 21039.166016 26487.570312
v 3406.233398 20994.039062 27103.894531
v 3705.117188 20157.734375 26699.107422
v 3751.525879 20275.738281 27103.894531
v 4189.545898 21195.646484 26374.892578
v 3663.449219 20675.982422 27518.162109
v 3565.264648 20956.429688 27706.384766
v 3608.783203 21127.984375 28149.708984
v 3801.218262 20449.273438 27706.384766
v 3957.052246 20404.154297 28283.660156
v 3684.282715 20734.728516 27911.419922
v 3735.561523 20956.429688 28321.265625
v 3200.698242 21971.140625 26514.011719
v 3381.604004 22157.248047 27121.041016
v 3986.802246 21416.785156 26548.515625
v 3986.089355 21701.783203 27107.933594
v 3795.102051 21949.609375 27307.253906
v 3255.395996 21488.691406 27693.777344
v 3399.865723 21593.353516 28283.837891
v 3556.812012 22342.865234 27505.470703
v 4188.357422 21835.898438 27454.677734
v 4002.149902 22181.257812 27676.703125
v 4037.376465 22245.708984 28255.285156
v 4769.107910 20632.730469 26333.236328
v 4530.822266 20988.601562 26550.691406
v 4685.791992 21174.812500 26943.955078
v 5209.192383 20443.449219 26488.203125
v 5379.836914 20647.421875 26860.628906
v 4986.582031 20781.556641 26726.492188
v 5183.209473 21019.847656 27098.917969
v 5379.836914 21258.136719 27429.667969
v 4292.536133 21296.816406 26768.148438
v 4520.503418 21415.583984 27125.906250
v 4986.582031 21338.484375 27337.208984
v 4567.511719 21736.296875 27576.351562
v 4567.511719 21996.289062 27871.292969
v 4586.231445 22169.691406 28306.068359
v 5131.124023 21551.583984 27701.302734
v 5083.605469 21748.210938 28336.625000
v 4882.411133 21894.644531 27972.937500
v 5016.542480 22038.503906 28410.628906
v 4156.047852 20415.005859 28862.693359
v 4233.998535 20618.867188 29207.056641
v 3930.949707 20994.039062 28873.542969
v 4160.995117 20994.039062 29311.302734
v 3593.423340 21749.564453 28873.542969
v 3662.152832 21851.992188 29216.189453
v 3420.697754 22220.830078 29433.650391
v 3964.997559 21592.873047 29464.892578
v 3944.802246 22172.232422 28934.931641
v 3572.498047 22397.423828 29868.568359
v 4160.875000 21727.011719 29868.564453
v 3964.994141 22181.357422 30065.193359
v 4162.369141 22358.548828 30437.605469
v 4347.289551 20225.613281 29052.085938
v 4586.125488 20443.068359 29427.146484
v 4419.617676 20994.039062 29606.244141
v 4978.853027 20267.269531 29647.236328
v 4824.961914 20660.523438 29796.939453
v 4714.559570 20994.039062 29922.697266
v 5196.306152 20463.888672 30024.820312
v 5413.760254 20660.511719 30366.001953
v 4993.062012 20994.037109 30217.638672
v 5288.003418 20994.037109 30450.087891
v 4568.846680 22128.753906 28979.658203
v 5130.997559 22120.388672 28873.542969
v 5191.503418 22177.035156 29348.667969
v 4525.561035 21519.958984 30100.359375
v 4741.625000 21706.164062 30458.447266
v 4348.369629 21965.292969 30261.818359
v 4581.562012 22201.394531 30644.654297
v 4878.546875 21312.908203 30332.158203
v 5131.826172 21551.197266 30658.992188
v 5356.429199 22393.666016 29812.619141
v 4991.850098 22044.238281 30851.701172
v 5527.055664 17786.488281 27913.998047
v 5598.483887 17836.144531 28283.658203
v 6032.219238 19509.333984 26229.070312
v 5814.759277 19876.486328 26436.119141
v 5990.554199 20057.548828 26860.617188
v 6344.722168 19347.982422 26461.023438
v 6546.390137 19429.550781 26902.289062
v 6153.134766 19664.292969 26622.326172
v 6345.948242 19840.082031 27078.082031
v 6538.761719 20015.869141 27575.505859
v 7046.492188 18889.484375 26330.861328
v 7516.927734 18870.230469 26418.007812
v 7453.664062 17844.746094 28330.714844
v 6880.736328 19025.951172 26522.097656
v 6937.764648 19337.621094 27100.908203
v 6748.282227 19622.613281 27295.542969
v 7516.927734 18963.830078 26712.949219
v 7516.927734 19115.476562 27103.894531
v 7141.538086 19459.720703 27554.662109
v 6888.260742 19777.578125 27761.710938
v 7013.525391 19925.154297 28283.660156
v 7469.918945 19363.326172 27728.285156
v 7663.096680 19462.785156 28283.660156
v 7241.952148 19539.289062 27947.917969
v 7368.155273 19630.210938 28283.660156
v 5771.796387 18037.890625 28893.910156
v 5971.112305 18247.623047 29195.656250
v 6105.237793 17854.367188 29126.298828
v 6261.128906 18048.445312 29420.740234
v 6149.476562 18861.880859 29139.910156
v 6201.724609 18652.953125 29420.740234
v 6563.533691 18044.621094 29882.669922
v 6461.128906 18638.320312 30081.572266
v 6581.817383 18837.492188 30398.523438
v 6013.644531 18960.699219 29139.910156
v 5751.346191 19168.648438 29480.570312
v 5489.048340 19594.050781 29718.861328
v 6147.459961 18993.308594 29463.427734
v 5882.303223 19376.599609 29901.101562
v 5712.468750 19769.841797 30076.900391
v 5935.889160 19945.634766 30496.238281
v 6166.417480 19197.736328 30079.960938
v 6470.344238 19240.580078 30614.367188
v 6069.810059 19552.380859 30294.355469
v 6166.422852 19775.111328 30672.998047
v 7523.930664 17768.574219 28590.345703
v 6733.399414 18044.619141 30177.613281
v 7042.385742 18053.923828 30658.949219
v 6674.287109 18444.236328 30297.042969
v 6799.282227 18638.320312 30614.367188
v 7272.978516 17863.498047 30866.078125
v 7137.785156 20040.470703 28662.802734
v 7790.166992 19512.886719 28600.302734
v 7562.285156 19846.421875 28828.181641
v 7727.656250 20045.630859 29216.490234
v 6713.063477 19054.750000 30791.779297
v 5597.298828 20254.167969 26643.167969
v 5802.303223 20450.794922 27057.251953
v 5614.052734 20864.880859 27253.884766
v 6145.506836 20254.167969 27253.873047
v 6007.308105 20647.421875 27450.500000
v 5791.886719 21030.263672 27636.710938
v 5969.720215 21195.646484 28144.550781
v 6323.182129 20379.757812 27709.630859
v 6500.635742 20490.634766 28283.660156
v 6107.602051 20802.390625 27843.757812
v 6189.553711 20997.027344 28318.171875
v 5576.464844 21371.427734 27822.921875
v 5731.424805 21547.234375 28341.185547
v 5493.128418 21919.654297 28537.818359
v 6069.810059 21329.785156 28537.808594
v 6634.983398 20112.093750 27968.761719
v 6718.583008 20195.693359 28283.660156
v 6588.058594 20614.896484 28658.937500
v 6491.228027 21014.998047 28862.755859
v 6610.392578 21225.601562 29211.029297
v 5542.633301 20267.255859 30252.697266
v 5785.387695 20463.888672 30627.748047
v 5654.073730 20994.037109 30745.029297
v 6075.282715 20267.267578 30889.494141
v 5756.818848 21605.326172 28881.273438
v 5878.466309 21732.894531 29184.767578
v 5614.118652 21975.740234 28873.542969
v 5793.240234 22097.275391 29417.462891
v 6194.101074 21455.523438 28873.542969
v 6383.123047 21633.685547 29313.039062
v 6337.161133 22009.402344 29612.210938
v 5538.769043 21396.232422 30859.539062
v 5747.277832 22380.537109 29836.027344
v 6337.161133 22304.343750 29902.621094
v 6933.903320 20418.267578 28857.498047
v 7123.275391 20614.896484 29262.031250
v 6730.020508 20832.345703 29052.193359
v 6965.154297 21049.812500 29433.158203
v 7334.401367 20221.640625 29056.056641
v 7551.863281 20449.513672 29435.890625
v 7376.069336 20874.025391 29655.287109
v 7200.287109 21267.281250 29780.066406
v 7769.324219 20677.386719 29776.406250
v 7550.389648 21040.007812 29850.832031
v 6778.268555 21583.921875 29627.837891
v 6652.060547 21898.822266 29738.412109
v 7073.209961 21583.921875 29875.892578
v 6890.353516 22137.115234 30094.019531
v 7128.646484 22375.410156 30399.910156
v 7516.927734 21583.919922 30101.177734
v 7516.927734 21964.296875 30294.066406
v 7516.927734 22259.238281 30471.802734
v 30.912476 13325.555664 31233.074219
v 43.972290 13325.555664 31822.957031
v 43.810791 13915.439453 31233.074219
v 56.708618 13915.439453 31822.957031
v 75.223389 13325.555664 32412.839844
v 62.487671 13325.554688 33002.726562
v 105.036377 13882.726562 32405.273438
v 102.394043 13882.725586 33056.761719
v 507.888916 13925.885742 32596.855469
v 539.015869 13997.547852 32944.097656
v 59.598389 14505.322266 31233.074219
v 59.598389 14505.322266 31822.957031
v 62.487671 15095.205078 31233.074219
v 62.487671 15095.205078 31822.957031
v 94.847778 14542.132812 32405.273438
v 400.197632 14443.710938 33057.386719
v 62.487671 15095.205078 32412.839844
v 94.847778 15132.015625 32965.917969
v 317.117188 14370.043945 32596.855469
v 282.205811 14959.926758 33138.003906
v 62.487671 13325.554688 33592.609375
v 62.487671 13325.554688 34182.492188
v 71.920654 13915.438477 33592.609375
v 62.487671 13915.438477 34182.492188
v 62.487671 13325.554688 34772.375000
v 62.487671 13325.554688 35362.257812
v 62.487671 13915.438477 34772.375000
v 62.487671 13915.438477 35362.257812
v 112.370728 14307.733398 33592.609375
v 94.847778 14519.261719 34197.230469
v 116.421143 15353.182617 33334.625000
v 116.421143 14853.188477 34403.687500
v 514.621094 14465.623047 33516.312500
v 448.590332 14599.774414 34197.230469
v 468.422363 15125.303711 33552.089844
v 62.487671 14505.321289 34772.375000
v 70.543457 14505.321289 35362.257812
v 102.937744 14968.012695 34772.375000
v 110.993530 15001.442383 35362.257812
v 652.058838 14719.051758 34543.378906
v 448.590332 15002.747070 34752.957031
v 438.329346 15148.471680 35362.257812
v 62.487671 15685.088867 31233.074219
v 62.487671 15685.088867 31822.957031
v 62.487671 16274.971680 31233.074219
v 62.487671 16274.971680 31822.957031
v 62.487671 15685.088867 32412.839844
v 62.487671 15685.087891 33002.726562
v 62.487671 16274.971680 32412.839844
v 62.487671 16274.970703 33002.726562
v 62.487671 16864.853516 31233.074219
v 62.487671 16864.853516 31822.957031
v 62.487671 17454.736328 31233.074219
v 62.487671 17454.736328 31822.957031
v 46.862183 16864.853516 32412.839844
v 46.862183 16864.853516 33002.726562
v 36.313110 17454.736328 32412.839844
v 36.313110 17454.736328 33002.726562
v 97.360840 15721.897461 33555.792969
v 120.609497 15943.065430 33904.195312
v 65.629028 16274.970703 33592.609375
v 106.079102 16274.970703 34043.976562
v 261.383667 15549.809570 33727.878906
v 472.184814 15736.020508 34121.660156
v 256.673218 16274.970703 34338.917969
v 682.985840 15922.231445 34618.566406
v 542.250244 16274.280273 34798.066406
v 657.111328 16470.447266 35125.128906
v 62.487671 16864.853516 33592.609375
v 94.847778 16808.689453 34238.660156
v 59.418335 17454.736328 33592.609375
v 59.418335 17454.736328 34182.492188
v 148.092285 16574.615234 34472.730469
v 116.421143 16967.873047 34657.753906
v 83.312134 17411.072266 34821.578125
v 97.195190 17578.589844 35128.210938
v 228.277222 16808.689453 34821.578125
v 540.912598 16864.853516 35187.597656
v 159.697510 17185.333984 35051.007812
v 389.126831 17411.072266 35226.925781
v 1701.516113 13117.572266 32688.628906
v 1592.331055 13295.608398 33016.589844
v 1938.575928 13049.384766 32682.244141
v 2164.313965 13122.011719 33045.808594
v 2950.148438 13325.555664 32635.126953
v 2674.161133 13272.939453 33045.808594
v 2989.365234 13915.439453 32635.126953
v 2821.660645 13915.438477 33002.726562
v 3010.067383 14505.322266 32627.548828
v 2857.988281 14505.321289 33002.726562
v 3010.067383 15095.205078 32619.968750
v 2869.905273 15095.204102 33002.726562
v 1632.579834 13351.101562 33508.832031
v 1645.614990 13373.919922 34134.136719
v 1718.645996 14020.887695 34651.097656
v 1796.181641 14108.333008 35252.687500
v 943.980225 14419.440430 33663.199219
v 1009.891846 14469.143555 34107.644531
v 830.432617 14897.423828 33769.554688
v 1027.066406 15073.224609 34173.484375
v 1510.099365 14492.136719 34195.683594
v 1378.647949 14855.767578 34401.105469
v 1073.733154 14532.037109 34737.218750
v 1265.944336 14738.534180 35362.257812
v 971.002930 14947.292969 35362.257812
v 1628.495850 14436.621094 34746.000000
v 1606.970703 14403.704102 35414.492188
v 1575.275391 15052.390625 34817.222656
v 1771.903076 15249.011719 35224.222656
v 2192.274658 13440.580078 33593.300781
v 2273.514404 13431.258789 34241.699219
v 2159.590820 13759.578125 34182.011719
v 2606.565430 13450.865234 33592.609375
v 2542.934082 13589.891602 34182.011719
v 2733.802246 13915.438477 33592.609375
v 2629.256348 13856.449219 34182.011719
v 2313.429688 13438.068359 34657.394531
v 2421.708984 13537.675781 35211.031250
v 2157.097412 13869.551758 34728.054688
v 2173.001709 13880.455078 35428.488281
v 2583.489258 13334.850586 35389.500000
v 2557.195312 13915.438477 34633.203125
v 2522.770508 13652.575195 35604.285156
v 2769.311035 14505.321289 33592.609375
v 2734.351562 14505.321289 34182.492188
v 2781.228516 15095.204102 33592.609375
v 2749.977539 15095.204102 34182.492188
v 2166.380371 14466.754883 34913.796875
v 1942.020264 14855.756836 35015.894531
v 2028.097656 15069.512695 35397.410156
v 2626.153809 14466.754883 34809.976562
v 2579.572266 14642.548828 35362.257812
v 2718.726074 15095.204102 34772.375000
v 2656.224121 15095.204102 35362.257812
v 3004.990723 15685.088867 32619.968750
v 2864.828613 15685.087891 33002.726562
v 3004.990723 16274.971680 32618.105469
v 2864.828613 16274.970703 33002.726562
v 2996.287109 16864.853516 32610.058594
v 2856.125000 16864.853516 33002.726562
v 2985.737793 17454.736328 32603.875000
v 2845.575684 17454.736328 33002.726562
v 830.444824 15528.975586 34339.121094
v 1006.232422 15683.936523 34815.191406
v 1182.020020 15838.896484 35187.605469
v 788.764648 16077.190430 35011.824219
v 1002.520264 16274.280273 35264.328125
v 1378.647949 15445.640625 35011.808594
v 1634.453613 15652.685547 35402.539062
v 1663.416992 16308.640625 35577.128906
v 1028.212646 16864.853516 35408.453125
v 1028.212646 17454.736328 35424.527344
v 1618.095703 16864.853516 35552.187500
v 1618.095703 17454.736328 35503.445312
v 2781.228516 15685.087891 33592.609375
v 2749.977539 15685.087891 34182.492188
v 2781.228516 16274.970703 33592.609375
v 2749.977539 16274.970703 34182.492188
v 1952.761475 15466.473633 35617.476562
v 2174.315674 16511.076172 35644.312500
v 2718.726074 15685.087891 34772.375000
v 2648.167969 15685.087891 35362.257812
v 2718.726074 16274.970703 34772.375000
v 2594.708008 16300.440430 35414.800781
v 2781.228516 16864.853516 33592.609375
v 2749.977539 16864.853516 34182.492188
v 2781.228516 17454.736328 33592.609375
v 2749.977539 17454.736328 34182.492188
v 2174.315674 16805.865234 35607.070312
v 2207.979004 17454.736328 35532.035156
v 2718.726074 16864.853516 34772.375000
v 2595.197754 16864.853516 35330.519531
v 2718.726074 17454.736328 34772.375000
v 2595.197754 17454.736328 35299.269531
v 102.937744 13325.554688 35781.718750
v 102.937744 13915.438477 35734.843750
v 438.329346 13325.554688 35953.113281
v 438.329346 13915.438477 35859.359375
v 110.993530 14505.321289 35687.964844
v 127.162109 14897.760742 35667.292969
v 438.329346 14505.321289 35765.605469
v 438.329346 14935.060547 35687.964844
v 1028.212646 13325.554688 36046.867188
v 1028.212646 13915.438477 35953.113281
v 1650.016602 13286.022461 36161.328125
v 1867.924805 13063.040039 36248.054688
v 1618.095703 13915.438477 36009.890625
v 1068.565430 14552.119141 35775.371094
v 898.839600 14882.495117 35688.128906
v 1618.095703 14351.054688 35791.621094
v 2266.960205 13286.022461 36186.042969
v 2109.653076 13063.040039 36248.054688
v 2155.745117 13875.697266 35883.597656
v 2563.946777 13325.554688 35906.363281
v 2522.770508 13652.575195 35792.800781
v 2330.067139 15095.204102 35715.425781
v 2543.604492 14752.570312 35684.058594
v 2563.946777 15095.204102 35715.425781
v 1890.259277 15859.728516 35667.292969
v 1890.259277 16134.460938 35667.292969
v 2172.824951 15671.895508 35711.687500
v 2174.315674 16275.121094 35681.222656
v 2555.890625 15685.087891 35717.742188
v 2532.863281 16120.791016 35687.144531
v 62.487671 18044.619141 31233.076172
v 62.487671 18044.619141 31822.958984
v 62.487671 18634.503906 31233.076172
v 46.862183 18634.503906 31822.958984
v 51.938599 18044.619141 32412.841797
v 51.938599 18044.619141 33002.726562
v 36.313110 18634.503906 32412.841797
v 46.223022 18634.503906 33002.726562
v 62.487671 19224.386719 31233.076172
v 31.236572 19224.386719 31822.958984
v 55.475952 19814.269531 31233.076172
v 24.224854 19814.269531 31822.958984
v 5.061890 19224.386719 32412.841797
v 30.597534 19224.386719 33002.726562
v -0.014526 19814.269531 32412.841797
v 31.236572 19814.269531 33002.726562
v 59.418335 18044.619141 33592.609375
v 59.418335 18044.619141 34182.492188
v 56.772095 18634.503906 33592.609375
v 62.487671 18634.503906 34182.492188
v 48.068237 18044.619141 34772.375000
v 88.518311 18044.619141 35158.660156
v 62.487671 18634.503906 34772.375000
v 102.937744 18634.503906 35143.035156
v 438.329346 18044.619141 35296.878906
v 438.329346 18634.503906 35250.000000
v 56.772095 19224.386719 33592.609375
v 62.487671 19224.386719 34182.492188
v 62.487671 19814.269531 33592.609375
v 62.487671 19814.269531 34182.492188
v 63.693848 19224.386719 34772.375000
v 104.143921 19224.386719 35111.781250
v 95.812744 19804.123047 34830.402344
v 118.029297 19600.732422 35086.542969
v 438.329346 19224.386719 35187.496094
v 279.433472 19993.988281 35065.707031
v 460.968506 19804.123047 35114.425781
v 39.850464 20404.152344 31233.076172
v 8.599243 20404.152344 31822.958984
v 31.236572 20994.037109 31233.076172
v -0.014526 20994.037109 31822.958984
v 15.610962 20404.152344 32412.841797
v 46.862183 20404.152344 33002.726562
v 31.236572 20994.037109 32412.841797
v 62.487671 20994.037109 33002.726562
v 15.610962 21583.919922 31233.076172
v -0.014526 21583.919922 31822.958984
v -0.014526 22173.802734 31233.076172
v -0.014526 22173.802734 31822.958984
v 31.236572 21583.919922 32412.841797
v 50.570557 21583.919922 33002.726562
v 18.351807 22173.802734 32412.841797
v 46.325684 22173.572266 33061.714844
v 62.487671 20404.152344 33592.609375
v 62.487671 20404.152344 34182.492188
v 62.487671 20994.037109 33592.609375
v 62.487671 20994.037109 34182.492188
v 102.937744 20404.152344 34740.402344
v 102.937744 20994.037109 34672.753906
v 460.968506 20381.513672 35038.449219
v 672.688965 20169.792969 35086.542969
v 438.329346 20994.037109 34931.125000
v 34.944946 21583.919922 33592.609375
v 82.347290 21575.314453 34158.492188
v 41.619995 22173.572266 33533.621094
v 84.170898 22173.802734 33975.019531
v 263.543823 21766.205078 34339.121094
v 440.143799 22204.406250 34277.957031
v 116.421143 21372.951172 34582.253906
v 451.434814 21575.314453 34682.726562
v 617.471680 22151.537109 34529.425781
v 2983.892578 18044.619141 32603.876953
v 2843.730957 18044.619141 33002.726562
v 2983.892578 18634.503906 32603.876953
v 2843.730957 18634.503906 33002.726562
v 2983.892578 19224.386719 32596.298828
v 2843.730957 19224.386719 33002.726562
v 2983.892578 19814.269531 32588.720703
v 2843.730957 19814.269531 33002.726562
v 1028.212646 18044.619141 35377.660156
v 1028.212646 18634.503906 35312.503906
v 1618.095703 18044.619141 35440.144531
v 1618.095703 18634.503906 35374.996094
v 1028.212646 19224.386719 35250.000000
v 1028.212646 19814.269531 35187.496094
v 1618.095703 19224.386719 35312.503906
v 1618.095703 19814.269531 35250.000000
v 2781.228516 18044.619141 33592.609375
v 2749.977539 18044.619141 34182.492188
v 2781.228516 18634.503906 33592.609375
v 2734.351562 18634.503906 34182.492188
v 2207.979004 18044.619141 35467.984375
v 2207.979004 18634.503906 35404.761719
v 2718.726074 18044.619141 34772.375000
v 2595.197754 18044.619141 35267.281250
v 2703.100586 18634.503906 34772.375000
v 2595.197754 18634.503906 35235.300781
v 2781.228516 19224.386719 33592.609375
v 2718.726074 19224.386719 34182.492188
v 2781.228516 19814.269531 33592.609375
v 2718.726074 19814.269531 34182.492188
v 2207.979004 19224.386719 35342.277344
v 2207.979004 19814.269531 35279.773438
v 2686.269043 19224.386719 34772.375000
v 2593.991699 19224.386719 35204.058594
v 2670.643555 19814.269531 34772.375000
v 2578.366211 19814.269531 35172.808594
v 2978.816406 20404.152344 32580.673828
v 2838.654297 20404.152344 33002.726562
v 2978.816406 20994.037109 32572.626953
v 2838.654297 20994.037109 33002.726562
v 2983.892578 21583.919922 32572.626953
v 2843.730957 21583.919922 33002.726562
v 2983.892578 22173.802734 32572.626953
v 2831.813477 22173.802734 33002.726562
v 910.996826 20563.048828 35061.832031
v 1075.859619 20381.513672 35114.230469
v 1075.859619 20946.388672 35024.593750
v 1304.252197 20717.996094 35086.218750
v 1618.095703 20404.152344 35184.347656
v 1618.095703 21122.992188 35049.277344
v 1618.095703 20828.050781 35108.628906
v 970.826416 22381.240234 34379.433594
v 1343.344727 22458.326172 34436.417969
v 1028.212646 21583.919922 34901.089844
v 931.233643 22199.197266 34597.433594
v 1618.095703 21583.919922 34999.988281
v 1571.221924 22226.541016 34747.214844
v 2781.228516 20404.152344 33592.609375
v 2718.726074 20404.152344 34182.492188
v 2781.228516 20994.037109 33592.609375
v 2718.726074 20994.037109 34182.492188
v 2207.979004 20404.152344 35214.363281
v 2187.644287 21253.470703 35065.386719
v 2187.644287 21017.517578 35112.472656
v 2655.017578 20404.152344 34772.375000
v 2562.740723 20404.152344 35141.558594
v 2600.187988 21043.669922 34830.402344
v 2541.996582 20880.132812 35106.394531
v 2781.228516 21583.919922 33592.609375
v 2718.726074 21583.919922 34182.492188
v 2769.311035 22173.802734 33592.609375
v 2718.726074 22173.802734 34182.492188
v 2187.644287 21524.931641 35038.457031
v 2207.979004 22173.802734 34928.933594
v 2595.197754 21583.919922 34754.339844
v 2595.197754 22173.802734 34706.722656
v 3387.745117 13325.555664 32531.220703
v 3387.745117 13915.439453 32531.220703
v 3977.628418 13325.555664 32468.718750
v 3977.628418 13915.439453 32468.718750
v 3387.745117 14505.322266 32508.015625
v 3387.745117 15095.205078 32484.812500
v 3977.628418 14505.322266 32437.476562
v 3977.628418 15095.205078 32421.851562
v 4567.511719 13325.555664 32421.851562
v 4567.511719 13915.439453 32406.234375
v 4993.722656 13325.555664 32557.007812
v 5124.991699 13325.554688 33002.726562
v 4994.370605 13915.439453 32541.392578
v 5125.639648 13915.438477 33002.726562
v 4567.511719 14505.322266 32390.617188
v 4567.511719 15095.205078 32403.103516
v 4994.370605 14505.322266 32541.392578
v 5125.639648 14505.321289 33002.726562
v 4978.096680 15095.205078 32553.878906
v 5109.366211 15095.204102 33002.726562
v 5124.991699 13325.554688 33592.609375
v 5140.617188 13325.554688 34182.492188
v 5124.991699 13915.438477 33592.609375
v 5124.991699 13915.438477 34182.492188
v 5173.074219 13325.554688 34772.375000
v 5313.341309 13276.410156 35417.777344
v 5140.617188 13915.438477 34772.375000
v 5219.230957 13915.438477 35362.257812
v 5140.617188 14505.321289 33592.609375
v 5140.617188 14505.321289 34182.492188
v 5156.242676 15095.204102 33592.609375
v 5156.242676 15095.204102 34182.492188
v 5140.617188 14505.321289 34772.375000
v 5234.852051 14505.321289 35362.257812
v 5156.242676 15095.204102 34772.375000
v 5324.873047 15097.688477 35414.800781
v 3387.745117 15685.088867 32484.812500
v 3387.745117 16274.971680 32482.949219
v 3977.628418 15685.088867 32437.466797
v 3977.628418 16274.971680 32421.851562
v 3387.745117 16864.853516 32474.902344
v 3387.745117 17454.736328 32468.718750
v 3977.628418 16864.853516 32406.234375
v 3977.628418 17454.736328 32406.234375
v 4567.511719 15685.088867 32418.720703
v 4567.511719 16274.971680 32390.617188
v 4967.547852 15685.088867 32553.878906
v 5098.816895 15685.087891 33002.726562
v 4972.624512 16274.971680 32541.392578
v 5103.893555 16274.970703 33002.726562
v 4567.511719 16864.853516 32375.000000
v 4567.511719 17454.736328 32375.000000
v 4967.547852 16864.853516 32541.392578
v 5098.816895 16864.853516 33002.726562
v 4962.471191 17454.736328 32541.392578
v 5093.740234 17454.736328 33002.726562
v 5140.617188 15685.087891 33592.609375
v 5140.617188 15685.087891 34182.492188
v 5124.991699 16274.970703 33592.609375
v 5140.617188 16274.970703 34182.492188
v 5156.242676 15685.087891 34772.375000
v 5319.915039 15685.087891 35314.894531
v 5171.868164 16274.970703 34772.375000
v 5319.915039 16274.970703 35256.117188
v 5124.991699 16864.853516 33592.609375
v 5156.242676 16864.853516 34182.492188
v 5124.991699 17454.736328 33592.609375
v 5140.617188 17454.736328 34182.492188
v 5197.403809 16864.853516 34772.375000
v 5329.825195 16864.853516 35219.886719
v 5197.403809 17454.736328 34772.375000
v 5345.450684 17454.736328 35188.640625
v 5458.121094 13047.018555 35651.414062
v 5484.007812 15295.972656 35646.460938
v 7791.239258 16547.025391 31002.699219
v 7725.505859 16864.853516 31095.621094
v 7661.064453 17507.013672 31261.337891
v 7800.683594 17738.494141 31539.201172
v 5584.820801 15685.087891 35609.835938
v 5775.274414 16271.975586 35565.843750
v 6103.869629 16466.605469 35646.460938
v 5747.277832 16864.853516 35467.468750
v 5747.277832 17454.736328 35389.339844
v 6219.654297 16864.853516 35609.835938
v 6383.130371 17408.767578 35564.289062
v 6723.708008 17574.750000 35628.000000
v 5395.630859 13440.274414 35708.960938
v 5367.277832 13915.438477 35722.933594
v 5382.898926 14505.321289 35695.398438
v 5416.458984 14902.716797 35672.250000
v 5691.760254 13276.410156 35842.265625
v 5747.277832 13915.438477 35894.093750
v 6369.139648 13362.452148 36154.648438
v 6587.086914 13190.420898 36268.890625
v 6337.161133 13915.438477 36079.667969
v 5747.277832 14505.321289 35824.753906
v 5707.292480 15097.688477 35736.789062
v 6337.161133 14505.321289 35994.031250
v 6337.161133 15095.204102 35906.003906
v 6649.588867 13583.676758 36229.597656
v 6878.547852 13362.452148 36324.597656
v 6736.458984 13915.438477 36203.445312
v 7031.400391 13915.438477 36288.414062
v 7516.927734 13325.554688 36469.695312
v 7516.927734 13915.438477 36383.617188
v 6941.049805 14536.731445 36165.199219
v 7147.014648 14361.041992 36259.550781
v 6927.043945 15095.204102 36067.328125
v 7247.116211 14754.298828 36227.218750
v 7473.017578 14536.731445 36283.296875
v 7473.017578 15089.365234 36186.332031
v 7640.372070 14888.843750 36252.328125
v 5879.762207 15685.087891 35698.523438
v 5990.566406 16073.350586 35667.292969
v 6337.161133 15685.087891 35823.042969
v 6315.163086 16271.975586 35725.367188
v 6514.596191 16864.853516 35687.964844
v 6610.404297 17181.494141 35667.292969
v 6927.043945 15685.087891 35984.363281
v 6927.043945 16274.970703 35890.613281
v 7516.927734 15685.087891 36078.117188
v 7516.927734 16274.970703 35999.992188
v 6927.043945 16864.853516 35805.480469
v 6923.019531 17408.767578 35719.769531
v 7516.927734 16864.853516 35930.484375
v 7516.927734 17454.736328 35852.359375
v 3387.745117 18044.619141 32468.720703
v 3387.745117 18634.503906 32468.720703
v 3977.628418 18044.619141 32406.236328
v 3977.628418 18634.503906 32406.236328
v 3387.745117 19224.386719 32445.525391
v 3387.745117 19814.269531 32422.330078
v 3977.628418 19224.386719 32374.994141
v 3977.628418 19814.269531 32343.751953
v 4567.511719 18044.619141 32359.376953
v 4567.511719 18634.503906 32343.751953
v 4962.471191 18044.619141 32525.767578
v 5093.740234 18044.619141 33002.726562
v 4962.471191 18634.503906 32510.142578
v 5093.740234 18634.503906 33002.726562
v 4567.511719 19224.386719 32328.126953
v 4567.511719 19814.269531 32296.875000
v 4967.547852 19224.386719 32510.142578
v 5098.816895 19224.386719 33002.726562
v 4972.624512 19814.269531 32494.517578
v 5103.893555 19814.269531 33002.726562
v 5124.991699 18044.619141 33592.609375
v 5124.991699 18044.619141 34182.492188
v 5124.991699 18634.503906 33592.609375
v 5140.617188 18634.503906 34182.492188
v 5188.700195 18044.619141 34772.375000
v 5352.372559 18044.619141 35146.750000
v 5250.392090 18634.503906 34772.375000
v 5398.438965 18634.503906 35101.878906
v 5124.991699 19224.386719 33592.609375
v 5156.242676 19224.386719 34182.492188
v 5140.617188 19814.269531 33592.609375
v 5171.868164 19814.269531 34182.492188
v 5342.784668 19194.013672 34817.898438
v 5446.312012 18977.138672 35073.339844
v 5319.915039 19814.269531 34711.175781
v 3387.745117 20404.152344 32414.283203
v 3387.745117 20994.037109 32406.236328
v 3977.628418 20404.152344 32343.751953
v 3977.628418 20994.037109 32343.751953
v 3387.745117 21583.919922 32406.236328
v 3387.745117 22173.802734 32399.615234
v 3977.628418 21583.919922 32343.751953
v 3977.628418 22173.802734 32321.505859
v 4567.511719 20404.152344 32281.250000
v 4567.511719 20994.037109 32281.250000
v 4983.173340 20404.152344 32478.890625
v 5114.442383 20404.152344 33002.726562
v 4993.722656 20994.037109 32478.890625
v 5124.991699 20994.037109 33002.726562
v 4814.754883 22437.492188 30985.832031
v 5385.105957 21789.488281 31006.673828
v 5219.078125 22253.476562 31192.880859
v 5446.305664 22462.716797 31534.048828
v 4567.511719 21583.919922 32281.250000
v 4567.511719 22173.802734 32265.623047
v 4993.722656 21583.919922 32478.890625
v 5124.991699 21583.919922 33002.726562
v 5009.348145 22173.802734 32478.890625
v 5156.242676 22173.802734 33002.726562
v 5143.758301 20404.152344 33592.609375
v 5175.009766 20404.152344 34182.492188
v 5128.132812 20994.037109 33592.609375
v 5169.375000 20994.037109 34182.492188
v 5319.915039 20404.152344 34665.113281
v 5329.906250 20994.037109 34630.144531
v 5140.617188 21583.919922 33592.609375
v 5197.484863 21583.919922 34182.492188
v 5171.868164 22173.802734 33592.609375
v 5228.735840 22173.802734 34182.492188
v 5345.531738 21583.919922 34585.199219
v 5361.157227 22173.802734 34538.324219
v 6581.826172 19448.005859 31044.464844
v 6471.721680 19814.269531 31144.507812
v 7180.845703 18256.753906 31000.107422
v 7115.717773 18682.597656 31211.271484
v 7201.679688 18911.287109 31548.324219
v 7444.445312 18053.923828 31211.271484
v 7756.756836 18044.619141 31638.621094
v 7356.315430 18518.033203 31393.365234
v 7573.932617 18703.162109 31802.941406
v 7791.551758 18888.292969 32138.218750
v 6828.157227 19240.580078 31237.886719
v 7111.391602 19224.386719 31638.611328
v 6705.064453 19814.269531 31439.449219
v 7037.503906 19855.595703 31840.263672
v 7408.088867 19224.386719 31933.552734
v 7293.813477 19686.517578 32048.425781
v 7210.489258 20079.773438 32131.761719
v 7703.030273 19224.386719 32264.591797
v 7504.242188 19820.642578 32409.095703
v 7714.670898 19954.767578 32841.394531
v 5747.277832 18044.619141 35304.371094
v 5747.277832 18634.503906 35212.636719
v 6337.161133 18044.619141 35458.675781
v 6337.161133 18634.503906 35364.941406
v 5532.324707 19370.392578 35044.875000
v 5736.282227 19194.013672 35131.503906
v 5736.282227 19858.892578 35017.394531
v 5925.579590 19692.013672 35107.378906
v 6337.161133 19224.386719 35283.035156
v 6050.584473 20085.269531 35065.707031
v 6283.191895 19858.892578 35169.003906
v 6847.709961 18044.619141 35595.992188
v 6985.579102 18583.054688 35551.796875
v 7516.927734 18754.099609 35625.464844
v 6927.043945 19224.386719 35427.433594
v 6927.043945 19814.269531 35337.628906
v 7516.927734 19224.386719 35535.011719
v 7516.927734 19814.269531 35425.648438
v 6028.142090 20660.521484 30955.873047
v 5949.015137 20994.037109 31018.458984
v 6334.406738 20432.650391 31228.046875
v 6593.531250 20598.033203 31583.546875
v 6209.969238 20994.037109 31313.400391
v 6516.423340 21029.880859 31797.289062
v 6608.892578 21250.406250 32156.472656
v 5766.647949 21592.867188 31213.712891
v 5994.526855 21789.500000 31560.337891
v 5601.271484 22069.460938 31399.927734
v 5777.650391 22229.173828 31647.621094
v 6107.830078 21396.244141 31420.751953
v 6252.185547 21589.291016 31783.363281
v 6152.134277 22173.802734 31967.941406
v 6550.410645 21583.919922 32245.101562
v 6457.654785 22179.173828 32432.470703
v 6588.058594 22379.382812 32776.316406
v 6659.909180 20204.777344 31500.222656
v 6842.198242 20402.503906 31797.289062
v 6769.324219 20857.150391 31976.802734
v 7168.808594 20404.152344 32188.476562
v 6986.791992 21053.785156 32373.933594
v 7204.260742 21250.417969 32733.347656
v 7350.428711 20404.152344 32483.417969
v 7663.325195 20420.476562 33023.902344
v 7293.813477 20857.162109 32591.396484
v 7432.844727 21029.888672 32959.074219
v 6815.478516 21583.919922 32540.042969
v 7110.419922 21583.919922 32872.105469
v 6697.701172 21986.128906 32642.185547
v 6920.372070 22130.669922 33035.441406
v 7305.721680 21583.919922 33167.046875
v 7225.082031 21881.957031 33294.570312
v 5747.277832 20404.152344 34942.015625
v 5747.277832 20994.037109 34860.980469
v 6151.418457 20404.152344 35049.277344
v 6446.360352 20404.152344 35117.503906
v 6360.512695 20995.685547 35015.066406
v 6572.708984 20800.156250 35086.542969
v 5747.277832 21583.919922 34769.160156
v 5747.277832 22173.802734 34685.156250
v 6337.161133 21583.919922 34922.671875
v 6337.161133 22173.802734 34838.667969
v 7786.294922 20627.988281 33323.242188
v 7726.630859 20994.037109 33382.894531
v 6927.043945 20404.152344 35245.816406
v 6706.833984 21193.412109 35065.707031
v 6912.894531 20995.685547 35143.996094
v 7516.927734 20404.152344 35349.468750
v 7516.927734 20994.037109 35302.589844
v 7143.041992 22275.212891 33397.433594
v 7600.663086 21583.919922 33476.640625
v 7463.375000 22107.742188 33619.460938
v 7701.667969 22333.527344 34039.417969
v 6912.894531 21623.062500 35039.421875
v 7100.089844 21452.529297 35107.378906
v 6927.043945 22173.802734 34953.113281
v 7274.586914 21845.785156 35065.707031
v 7489.500000 21623.062500 35189.425781
v 7489.500000 22187.951172 35020.667969
v 7667.842773 22000.755859 35128.210938
v 7142.652344 18044.619141 35680.960938
v 7221.229492 18352.126953 35657.957031
v 7516.927734 18044.619141 35758.605469
v 7516.927734 18459.158203 35680.960938
v 9984.195312 10629.726562 26136.031250
v 10012.662109 12861.674805 22521.039062
v 9454.246094 12930.716797 23131.746094
v 9438.530273 12916.781250 23564.593750
v 9840.205078 12763.187500 22950.955078
v 9876.459961 12713.963867 23564.593750
v 8351.166992 12938.446289 26043.560547
v 8836.976562 12338.265625 26062.703125
v 8796.699219 12896.778320 25537.025391
v 8620.209961 12720.984375 25856.503906
v 10130.034180 11809.480469 25018.767578
v 9429.343750 11073.758789 26052.695312
v 9498.478516 11705.310547 25546.148438
v 9349.084961 11527.572266 25883.291016
v 10008.689453 11130.896484 25525.324219
v 9799.814453 10905.700195 25897.734375
v 9872.734375 11560.767578 25339.109375
v 9615.433594 11312.054688 25659.439453
v 9518.139648 12978.734375 24006.250000
v 9520.396484 12896.778320 24984.527344
v 10009.565430 12145.790039 24982.820312
v 9847.419922 12914.611328 24183.517578
v 9814.209961 12743.114258 24787.898438
v 9405.107422 12145.790039 25425.232422
v 9113.131836 12143.298828 25889.296875
v 9278.242188 12700.149414 25292.029297
v 9036.087891 12503.522461 25669.447266
v 9714.624023 12145.790039 25130.291016
v 9603.732422 12503.522461 25047.031250
v 10699.070312 10633.482422 25591.572266
v 10488.002930 10564.490234 25933.292969
v 11056.226562 10568.859375 25525.898438
v 11056.226562 10389.560547 25924.125000
v 11890.550781 10642.611328 25010.822266
v 12235.993164 10606.957031 24957.591797
v 11674.797852 10523.061523 25333.169922
v 11646.109375 10296.861328 25924.125000
v 12235.993164 10427.658203 25334.242188
v 12235.993164 10288.976562 25924.125000
v 10613.177734 12397.984375 22510.828125
v 10613.177734 12853.741211 21931.144531
v 10416.549805 12661.080078 22319.306641
v 11167.108398 12294.761719 21794.943359
v 11013.850586 12248.304688 22342.451172
v 10866.602539 12688.538086 21758.687500
v 10788.971680 12460.486328 22117.572266
v 10573.355469 12397.149414 22974.708984
v 10658.818359 12425.370117 23305.845703
v 10278.414062 12476.312500 22974.708984
v 10495.812500 12698.776367 23567.654297
v 11056.226562 12224.842773 22974.708984
v 11056.226562 12376.765625 23338.759766
v 11056.226562 12735.673828 23552.503906
v 11834.601562 11786.066406 21900.107422
v 11741.348633 11713.657227 22384.826172
v 12475.285156 11236.470703 22605.863281
v 12181.117188 11696.630859 21740.064453
v 12261.591797 11422.470703 22399.472656
v 11737.487305 11678.553711 22974.708984
v 11829.452148 11739.261719 23410.113281
v 12416.217773 11185.232422 22974.708984
v 12416.217773 11146.240234 23564.593750
v 12121.276367 11383.611328 22974.708984
v 12109.518555 11547.943359 23589.880859
v 11641.227539 11974.137695 21740.064453
v 11446.407227 11937.318359 22384.826172
v 11947.904297 11857.701172 21506.851562
v 11442.544922 11973.484375 22974.708984
v 11638.138672 12162.823242 23447.423828
v 11646.109375 12735.673828 23579.804688
v 12001.771484 12145.790039 23744.845703
v 12044.787109 12735.673828 23743.953125
v 10466.343750 11688.203125 24954.773438
v 11196.508789 11160.863281 24967.970703
v 11022.418945 11509.599609 24858.335938
v 10488.002930 10946.970703 25430.960938
v 10305.815430 10737.641602 25742.775391
v 10466.343750 11393.260742 25114.673828
v 11022.418945 10964.951172 25197.261719
v 10803.252930 11282.099609 25047.031250
v 10466.343750 12145.790039 24841.361328
v 10394.903320 12924.521484 24154.476562
v 10489.313477 12765.916992 24642.253906
v 11056.226562 12145.790039 24681.005859
v 11056.226562 12735.673828 24646.550781
v 11674.797852 10964.951172 24884.048828
v 11902.262695 11770.396484 24402.587891
v 11681.825195 11566.624023 24582.318359
v 12397.613281 11107.104492 24154.476562
v 12221.713867 10947.813477 24642.613281
v 12094.635742 11566.624023 24185.367188
v 12015.566406 11377.140625 24487.101562
v 11497.294922 10767.608398 25135.826172
v 11829.152344 12145.790039 24317.482422
v 11534.210938 12145.790039 24527.523438
v 11760.619141 12735.673828 24301.857422
v 11465.677734 12735.673828 24511.898438
v 12001.771484 12145.790039 24022.541016
v 12044.787109 12735.673828 24006.916016
v 8959.388672 10638.845703 26776.703125
v 8858.295898 10541.628906 27103.892578
v 8702.796875 10567.918945 27730.271484
v 9286.577148 10558.137695 26644.359375
v 9286.577148 10331.961914 27103.892578
v 9823.124023 10491.741211 26460.673828
v 9876.459961 10269.307617 27103.892578
v 9304.254883 10403.667969 27719.187500
v 9512.666992 10526.958984 28054.974609
v 9928.419922 10417.716797 27745.734375
v 9766.433594 10526.958984 28054.974609
v 7848.497070 10634.885742 30859.835938
v 8907.917969 10966.023438 26709.607422
v 8707.098633 10966.022461 27103.892578
v 8902.940430 11555.907227 26689.886719
v 8735.235352 11555.906250 27103.892578
v 7812.073242 11837.850586 27958.642578
v 7888.304688 11737.607422 28283.658203
v 8691.679688 10854.715820 27712.464844
v 8809.139648 11544.140625 27676.146484
v 8911.083008 11732.924805 28093.859375
v 8350.086914 12369.397461 26695.953125
v 8356.306641 12370.055664 27103.892578
v 8291.883789 12739.360352 26505.199219
v 8242.094727 12735.672852 27103.892578
v 8698.236328 12157.203125 26526.554688
v 8591.491211 12075.114258 27103.892578
v 8443.719727 12545.190430 26302.697266
v 8045.271484 12145.789062 28283.658203
v 8075.703125 12735.672852 28283.658203
v 8583.433594 12191.039062 27648.523438
v 8852.364258 12145.789062 28147.240234
v 8546.639648 12735.672852 27814.355469
v 8854.634766 12768.428711 28288.404297
v 9254.260742 10912.687500 26381.199219
v 9058.314453 11555.907227 26394.945312
v 9590.939453 10680.503906 26228.488281
v 9149.313477 10966.022461 27850.976562
v 9444.254883 10966.022461 28101.714844
v 9074.095703 11339.668945 27861.023438
v 9277.065430 11544.140625 28175.892578
v 10159.688477 10688.254883 27977.003906
v 9928.419922 10917.338867 28097.087891
v 9876.459961 11555.906250 28200.363281
v 9036.087891 11945.009766 26357.152344
v 9281.838867 12194.855469 28424.937500
v 9082.052734 12593.638672 28488.195312
v 9836.085938 12194.855469 28355.845703
v 9930.150391 12735.672852 28371.443359
v 7857.401367 11215.432617 29066.785156
v 7942.669922 11145.942383 29463.425781
v 8082.118164 11565.627930 28890.992188
v 8237.612305 11414.241211 29463.425781
v 8426.451172 11811.651367 29108.453125
v 8503.399414 11709.182617 29463.425781
v 8125.143555 11095.304688 30095.806641
v 8069.798828 10864.579102 30655.203125
v 8333.993164 11307.901367 29927.511719
v 8417.318359 11254.315430 30320.767578
v 8503.228516 11181.639648 30643.191406
v 8574.562500 11525.080078 30095.806641
v 8815.859375 11567.917969 30630.201172
v 8295.847656 12145.789062 28715.773438
v 8297.845703 12735.672852 28701.777344
v 8476.082031 12145.789062 29010.714844
v 8663.984375 12145.789062 29463.425781
v 8658.323242 12735.672852 29463.425781
v 8885.000000 12132.806641 30078.474609
v 8956.627930 11927.523438 30424.912109
v 8873.321289 12772.353516 30078.474609
v 8973.584961 12993.434570 30375.216797
v 9036.087891 11772.553711 30818.167969
v 9475.307617 12424.193359 28595.136719
v 9281.838867 12768.428711 28651.593750
v 9612.541016 12424.193359 28595.136719
v 9635.208984 12735.672852 28629.085938
v 9015.253906 12320.779297 30291.878906
v 9096.780273 12132.806641 30630.201172
v 9015.253906 12600.179688 30291.878906
v 9134.411133 12772.353516 30600.382812
v 10466.343750 10372.000000 26514.009766
v 10515.027344 10445.677734 27154.837891
v 11056.226562 10327.230469 26514.009766
v 11056.226562 10506.526367 27068.158203
v 10350.856445 10554.129883 27583.748047
v 11646.109375 10310.722656 26514.009766
v 11646.109375 10521.270508 27021.281250
v 12235.993164 10334.970703 26514.009766
v 12235.993164 10537.778320 26974.404297
v 10744.111328 10688.254883 27385.429688
v 11056.226562 10725.266602 27363.099609
v 10514.395508 10884.882812 27756.861328
v 10284.681641 11081.510742 28018.671875
v 10692.734375 11555.906250 27938.617188
v 10397.792969 11555.906250 28045.251953
v 11056.226562 11020.208008 27574.406250
v 11056.226562 11555.906250 27844.468750
v 10753.232422 11858.901367 27980.664062
v 10520.500000 12091.632812 28061.847656
v 10466.343750 12735.672852 28176.701172
v 11056.226562 11891.351562 27963.837891
v 11056.226562 12186.293945 28068.144531
v 11104.579102 12784.021484 28352.970703
v 11646.109375 10784.942383 27316.222656
v 12235.993164 10831.819336 27269.347656
v 11646.109375 11079.884766 27530.273438
v 11656.954102 11592.464844 27842.843750
v 11860.811523 11813.463867 28006.455078
v 12235.993164 11126.760742 27517.394531
v 12235.993164 11492.089844 27812.335938
v 12235.993164 11787.031250 28084.675781
v 11467.555664 11896.800781 27963.597656
v 11656.954102 12114.373047 28124.755859
v 11646.109375 12589.717773 28440.404297
v 12197.418945 12113.659180 28378.695312
v 11975.075195 12460.485352 28510.732422
v 11333.442383 13012.880859 28594.056641
v 12392.825195 11754.729492 29628.296875
v 11906.236328 11807.115234 30218.179688
v 11906.236328 11807.115234 30391.974609
v 12212.116211 11747.604492 30034.255859
v 12318.729492 11780.479492 30588.005859
v 11648.255859 12844.506836 28823.828125
v 11830.196289 12872.882812 29463.425781
v 12337.937500 12224.529297 28873.541016
v 12321.516602 12122.934570 29444.373047
v 12042.996094 12516.338867 28873.541016
v 12077.801758 12577.940430 29463.425781
v 11826.983398 12145.789062 30163.550781
v 11826.983398 12145.789062 30497.990234
v 11788.129883 12737.818359 30042.578125
v 11819.388672 12762.949219 30677.761719
v 12045.263672 12145.789062 29868.609375
v 12182.729492 12086.800781 30729.517578
v 12021.483398 12542.621094 29838.798828
v 11981.748047 12584.504883 30897.437500
v 16544.544922 8237.645508 30169.970703
v 16533.636719 8225.104492 30643.191406
v 16955.058594 8138.038574 30111.849609
v 16955.058594 7998.038574 30643.191406
v 13106.835938 10657.101562 23829.867188
v 13666.752930 10641.423828 23219.150391
v 13448.378906 10585.679688 23605.781250
v 14005.642578 10574.814453 23093.298828
v 14005.642578 10379.891602 23564.593750
v 14595.525391 10521.992188 22989.726562
v 14595.525391 10264.566406 23564.593750
v 13064.499023 10618.868164 24154.476562
v 12848.198242 10544.263672 24755.066406
v 13415.759766 10455.195312 24154.476562
v 13415.759766 10360.407227 24744.359375
v 12825.875977 10374.988281 25334.242188
v 12825.875977 10320.227539 25924.125000
v 13415.759766 10281.235352 25334.242188
v 13415.759766 10281.235352 25924.125000
v 14005.642578 10249.984375 24154.476562
v 14005.642578 10203.107422 24744.359375
v 14754.061523 10048.964844 24272.531250
v 14654.607422 10017.220703 24744.359375
v 14572.669922 10119.967773 24107.333984
v 14359.666016 10103.089844 24744.359375
v 14277.482422 10074.958984 25479.677734
v 14277.482422 10074.958984 25692.558594
v 14050.769531 10144.968750 25303.527344
v 14050.769531 10144.968750 25903.162109
v 14547.669922 10026.272461 25303.527344
v 14595.525391 10052.341797 25777.966797
v 14319.138672 10095.792969 25086.419922
v 14595.525391 10103.089844 26072.908203
v 12825.875977 11223.179688 22559.984375
v 12825.875977 11562.478516 21794.943359
v 12825.875977 11349.228516 22265.042969
v 13606.830078 11219.597656 22014.589844
v 13412.425781 11143.414062 22392.328125
v 13412.425781 11424.731445 21808.755859
v 13213.575195 11319.807617 22200.705078
v 12825.875977 11065.448242 22974.708984
v 12876.475586 10852.936523 23605.781250
v 13448.378906 10851.986328 23003.398438
v 13273.497070 10733.884766 23436.611328
v 14027.316406 11169.250000 21808.755859
v 14005.642578 10926.744141 22384.826172
v 13845.138672 11332.900391 21621.333984
v 14595.525391 11015.601562 21794.943359
v 14595.525391 10814.394531 22384.826172
v 14005.642578 10728.076172 22798.357422
v 14595.525391 10681.199219 22694.783203
v 12769.557617 10812.162109 24154.476562
v 12666.452148 10739.044922 24565.576172
v 16013.191406 9434.274414 23781.658203
v 15339.972656 10024.145508 23843.847656
v 15185.408203 10568.868164 23033.628906
v 15160.169922 10244.136719 23614.169922
v 15800.056641 9811.013672 23718.990234
v 15775.292969 10596.249023 23109.822266
v 15775.292969 10301.307617 23447.320312
v 17151.291016 9413.440430 22622.736328
v 16603.074219 9419.993164 23191.775391
v 16389.939453 9303.529297 23576.857422
v 17234.626953 8892.612305 23233.443359
v 17110.710938 8841.325195 23564.593750
v 16996.330078 9220.089844 23015.980469
v 16815.769531 9004.421875 23564.593750
v 16552.261719 10637.453125 22646.128906
v 17052.888672 9786.257812 22545.177734
v 16915.583984 10414.951172 22562.671875
v 16556.759766 9786.257812 23103.791016
v 16261.818359 9786.257812 23400.677734
v 16369.177734 10425.849609 22957.884766
v 16186.093750 10214.244141 23325.601562
v 16757.947266 9786.257812 22808.849609
v 16692.640625 10244.198242 22733.125000
v 15884.076172 9370.640625 24154.476562
v 15745.603516 9401.098633 24688.648438
v 15916.978516 9444.811523 25106.638672
v 15160.169922 9911.384766 24107.333984
v 15244.396484 9679.557617 24688.648438
v 14946.716797 10095.792969 23879.275391
v 15589.134766 9598.166016 24154.476562
v 15509.650391 9494.787109 24688.648438
v 15185.408203 9789.111328 25334.242188
v 15175.896484 9985.681641 25946.136719
v 14972.927734 10095.792969 26157.441406
v 15742.328125 9598.902344 25315.658203
v 15775.292969 9860.398438 25924.125000
v 16643.554688 8892.612305 24279.074219
v 16643.554688 8892.612305 24465.980469
v 16414.226562 9048.054688 24111.257812
v 16414.226562 9124.742188 24695.308594
v 16911.839844 8810.552734 24111.257812
v 16955.058594 8841.325195 24559.220703
v 16686.400391 8913.446289 23885.816406
v 16955.058594 9017.238281 24854.162109
v 16365.175781 9405.933594 25142.478516
v 16955.058594 9312.179688 25207.140625
v 17096.529297 9462.849609 26190.599609
v 16382.535156 9771.460938 25475.773438
v 16428.798828 9897.490234 25834.087891
v 16955.058594 9723.341797 25502.082031
v 16931.419922 9798.097656 25905.744141
v 15185.408203 10890.596680 21794.943359
v 15185.408203 10781.217773 22384.826172
v 15775.292969 10796.843750 21794.943359
v 15775.292969 10765.591797 22384.826172
v 15185.408203 10694.898438 22738.687500
v 15775.292969 10710.524414 22814.880859
v 16365.175781 10821.253906 21794.943359
v 16359.451172 10730.913086 22423.632812
v 16955.058594 11024.385742 21794.943359
v 16955.058594 10804.277344 22330.271484
v 16159.005859 10697.376953 22789.388672
v 12857.421875 10478.023438 26572.996094
v 12857.421875 10615.269531 26877.976562
v 13415.759766 10421.136719 26514.009766
v 13415.759766 10600.434570 26910.859375
v 14005.642578 10280.353516 26514.009766
v 14020.289062 10520.098633 27117.335938
v 14595.525391 10200.119141 26514.009766
v 14595.525391 10308.598633 27103.892578
v 14220.980469 10607.104492 27693.775391
v 14170.071289 10524.944336 28283.658203
v 14861.988281 10069.796875 27939.402344
v 14747.145508 10005.464844 28283.658203
v 14637.426758 10284.129883 27723.177734
v 14452.204102 10230.002930 28283.658203
v 13682.125977 9425.368164 29107.468750
v 13682.125977 9425.368164 29195.654297
v 13622.515625 9431.705078 30227.314453
v 13623.292969 9411.881836 30643.191406
v 13018.040039 10511.273438 29611.136719
v 13636.587891 9786.256836 29074.792969
v 13555.525391 9772.676758 29420.738281
v 13547.593750 10376.139648 29015.927734
v 13248.375977 10339.243164 29434.074219
v 13038.873047 9972.178711 30227.314453
v 13038.873047 9972.178711 30528.675781
v 12935.816406 10339.243164 30039.734375
v 12926.722656 10339.373047 30692.457031
v 13390.076172 9769.586914 30030.687500
v 13321.561523 9779.833008 30692.457031
v 13157.636719 10118.018555 29834.056641
v 13178.678711 10118.234375 30921.931641
v 13845.907227 9425.368164 29107.468750
v 14064.863281 9549.449219 29468.621094
v 14595.525391 9416.303711 29616.992188
v 14054.571289 9359.715820 30039.734375
v 14005.642578 9169.183594 30643.191406
v 14834.818359 8875.534180 30301.517578
v 14759.955078 8828.515625 30643.191406
v 14621.124023 9109.584961 30084.257812
v 14465.012695 8953.674805 30643.191406
v 14027.778320 9751.621094 28995.962891
v 13979.561523 10337.559570 28712.916016
v 14556.944336 9821.389648 28834.960938
v 14595.525391 9528.677734 29322.050781
v 14334.594727 10115.211914 28612.615234
v 13890.562500 9566.995117 29834.056641
v 12857.421875 10812.172852 27113.929688
v 13415.759766 10835.680664 27205.800781
v 12825.875977 11142.386719 27500.066406
v 12825.875977 11429.596680 27795.007812
v 12803.020508 11689.739258 28290.794922
v 13455.406250 11147.596680 27668.349609
v 13611.439453 11158.885742 28283.658203
v 13285.209961 11336.884766 27848.025391
v 13316.497070 11390.298828 28283.658203
v 12591.156250 11895.612305 28492.179688
v 13833.424805 10772.971680 27322.927734
v 13926.038086 10883.602539 27693.775391
v 13875.129883 10863.944336 28283.658203
v 13066.043945 11181.696289 29110.048828
v 13003.798828 10977.450195 29434.074219
v 12911.766602 11554.833008 28897.470703
v 12735.167969 11557.223633 29444.373047
v 13390.399414 10964.229492 28872.886719
v 13170.210938 10788.441406 29217.880859
v 13217.331055 11357.490234 28716.792969
v 12933.375977 11025.011719 30014.611328
v 12779.296875 10966.022461 30643.191406
v 12915.416992 11479.568359 30075.193359
v 12718.968750 11531.669922 30566.146484
v 12605.641602 11929.587891 28873.541016
v 12570.322266 11911.070312 29235.042969
v 13765.546875 10746.760742 28635.726562
v 15448.115234 9459.080078 28540.994141
v 16049.710938 9473.374023 27951.117188
v 15821.966797 9395.668945 28320.082031
v 15362.035156 10055.025391 26464.949219
v 15302.978516 10008.282227 27103.892578
v 15126.082031 10121.322266 26464.949219
v 15008.037109 10143.106445 27103.892578
v 15716.302734 9952.169922 26464.949219
v 15775.292969 9811.414062 27103.892578
v 15152.314453 9953.522461 27723.177734
v 15225.054688 9705.911133 28320.082031
v 14933.623047 10111.465820 27546.148438
v 15821.966797 9633.162109 27730.205078
v 15656.457031 9556.698242 28147.738281
v 16580.849609 9452.539062 27257.062500
v 16928.466797 9425.969727 26480.914062
v 16902.572266 9346.516602 27077.818359
v 16376.603516 9396.517578 27730.205078
v 16365.175781 9181.512695 28283.658203
v 17224.101562 8896.367188 27983.652344
v 17098.955078 8797.273438 28283.658203
v 16998.507812 9098.062500 27749.724609
v 16804.013672 8981.954102 28283.658203
v 16424.164062 9634.070312 26480.914062
v 16376.603516 9571.509766 27077.818359
v 16692.513672 9500.972656 26480.914062
v 16670.953125 9494.208984 26863.808594
v 16187.593750 9535.863281 27557.861328
v 15358.630859 9422.430664 28873.541016
v 15166.363281 9332.337891 29419.378906
v 15972.699219 8803.901367 29630.578125
v 15775.292969 9253.672852 28873.541016
v 15775.759766 9076.862305 29445.740234
v 15185.408203 8812.889648 30224.423828
v 15185.408203 8659.038086 30643.191406
v 15185.408203 9042.359375 29929.482422
v 15775.759766 8693.282227 30041.275391
v 15775.292969 8498.047852 30643.191406
v 15579.445312 8975.948242 29836.626953
v 15063.689453 9578.524414 28873.541016
v 14957.037109 9500.543945 29193.386719
v 16365.175781 8681.047852 29606.710938
v 16365.175781 9127.795898 28873.541016
v 16424.164062 9069.266602 29401.089844
v 17074.505859 8767.618164 28656.558594
v 16788.216797 8705.116211 29683.947266
v 16965.625000 9159.043945 28862.158203
v 16920.794922 9097.987305 29524.529297
v 16354.820312 8394.833984 30005.328125
v 16238.695312 8372.583984 30643.191406
v 16972.931641 8547.688477 29810.728516
v 17051.134766 8966.329102 29765.279297
v 7913.525391 10585.383789 31233.074219
v 7944.614258 10569.758789 31822.957031
v 7897.737305 10616.625977 32412.839844
v 7848.281250 10655.503906 32841.593750
v 8208.466797 10801.882812 31233.074219
v 8239.555664 10786.418945 31822.957031
v 8612.607422 11096.824219 31233.074219
v 8643.858398 11081.360352 31822.957031
v 8907.548828 11376.131836 31233.074219
v 8938.799805 11313.799805 31822.957031
v 8192.679688 10786.418945 32412.839844
v 8069.669922 10779.126953 33024.023438
v 8643.858398 11081.360352 32412.839844
v 8643.858398 11096.985352 33002.722656
v 8938.799805 11313.799805 32412.839844
v 8938.799805 11313.798828 33002.722656
v 9105.190430 11671.074219 31233.074219
v 9177.279297 11608.741211 31822.957031
v 9202.490234 11608.741211 32412.839844
v 9202.490234 11608.740234 33002.722656
v 9328.278320 12145.789062 31233.074219
v 9490.270508 12145.436523 31786.521484
v 9470.361328 12711.731445 31277.767578
v 9575.169922 12499.142578 31565.603516
v 9636.387695 12341.829102 31958.859375
v 9596.004883 12892.398438 31504.191406
v 9669.325195 12711.731445 31786.521484
v 9497.432617 11981.811523 32412.839844
v 9497.432617 11954.267578 33002.722656
v 9680.411133 12276.752930 32412.839844
v 9712.625977 12249.208984 33002.726562
v 9842.769531 12735.672852 32412.839844
v 9957.063477 12735.671875 33002.726562
v 8106.810547 10910.117188 33592.605469
v 8142.151367 11127.130859 34205.328125
v 8362.340820 11279.552734 34417.187500
v 8596.981445 11147.003906 33592.605469
v 8500.654297 11207.917969 34023.929688
v 8891.923828 11348.191406 33592.605469
v 8697.046875 11412.387695 34205.328125
v 7969.084961 11215.634766 34613.609375
v 8142.151367 11367.721680 34795.089844
v 8161.673828 11652.827148 35417.117188
v 8714.062500 11672.492188 34764.738281
v 8529.012695 11775.551758 35257.062500
v 8394.875977 11857.723633 35650.320312
v 8922.268555 11897.771484 34956.277344
v 8714.062500 11955.228516 35417.117188
v 9171.248047 11643.132812 33592.605469
v 9108.754883 11731.243164 34182.488281
v 9048.880859 11806.922852 34563.023438
v 9466.190430 11969.892578 33592.605469
v 9403.697266 12044.312500 34182.492188
v 9713.435547 12264.833984 33592.609375
v 9657.377930 12339.253906 34182.492188
v 10034.861328 12785.313477 33552.242188
v 9974.354492 12785.313477 34155.339844
v 9291.191406 12151.050781 34749.230469
v 9144.812500 12271.108398 35362.257812
v 9533.501953 12510.097656 34935.433594
v 9432.852539 12718.303711 35398.492188
v 9604.596680 12404.330078 34542.179688
v 9737.752930 12718.303711 34752.238281
v 9658.506836 12903.352539 35226.019531
v 12499.779297 11786.065430 31073.242188
v 11940.079102 12977.760742 30939.105469
v 12405.599609 12178.545898 31255.150391
v 12509.128906 12397.010742 31539.501953
v 12131.632812 12762.949219 31174.669922
v 12443.698242 12735.672852 31670.023438
v 10176.766602 13015.035156 33721.957031
v 10176.766602 13015.035156 33940.609375
v 7964.659180 11769.164062 35952.136719
v 7825.838867 11838.053711 36260.843750
v 8245.763672 12090.926758 35981.355469
v 7916.981445 12145.788086 36336.253906
v 8280.456055 12735.671875 36172.644531
v 7985.514648 12735.671875 36404.777344
v 8696.694336 12241.072266 35806.273438
v 8696.694336 12735.671875 35970.972656
v 9047.260742 12364.270508 35708.960938
v 9136.756836 12735.671875 35750.468750
v 16607.046875 8270.192383 31115.984375
v 16907.339844 8162.234375 31280.796875
v 17072.154297 8249.358398 31622.525391
v 13682.342773 9445.014648 30958.751953
v 13002.881836 10511.489258 31042.085938
v 13585.356445 9786.256836 31000.310547
v 13391.487305 10339.373047 31146.968750
v 13702.959961 10062.271484 33169.859375
v 13699.089844 10376.138672 33063.179688
v 14274.901367 8892.611328 31451.318359
v 14274.901367 8892.611328 31648.529297
v 14030.598633 9181.210938 31205.035156
v 14188.519531 9170.553711 31836.277344
v 14583.494141 8807.455078 31246.044922
v 14582.204102 8818.537109 31836.277344
v 14378.843750 8917.408203 31058.062500
v 14376.695312 8956.711914 32041.785156
v 14239.104492 9383.241211 32390.394531
v 14238.177734 9452.539062 32902.496094
v 14769.951172 8848.579102 32155.080078
v 14535.267578 9122.735352 32363.570312
v 14537.682617 9277.949219 33060.566406
v 13992.011719 9821.012695 31317.580078
v 14179.764648 9687.584961 31822.957031
v 13963.395508 10419.016602 31414.302734
v 14131.858398 10644.229492 31575.708984
v 14340.967773 10040.811523 31487.640625
v 14383.625977 9982.526367 31822.957031
v 14340.967773 10250.973633 31487.640625
v 14552.573242 10401.260742 31764.650391
v 14239.104492 9622.877930 32390.394531
v 14105.300781 9785.609375 33004.222656
v 14115.741211 10648.943359 32664.804688
v 13953.725586 10421.844727 32777.085938
v 14532.380859 9871.938477 32397.701172
v 14602.201172 10421.844727 32761.378906
v 13702.959961 10062.271484 33310.347656
v 13699.089844 10376.138672 33363.558594
v 14695.850586 9331.089844 33592.605469
v 14825.697266 9430.732422 33989.796875
v 14038.268555 9914.143555 33541.226562
v 14256.647461 10016.417969 33968.968750
v 13869.431641 10376.138672 33658.500000
v 14156.498047 10361.277344 34172.359375
v 14400.909180 9591.632812 33592.605469
v 14589.495117 9769.806641 34176.015625
v 14353.292969 10154.743164 34362.226562
v 14242.054688 10547.998047 34564.316406
v 14773.978516 9934.667969 34772.371094
v 14879.066406 10050.570312 35118.773438
v 14495.723633 10361.277344 34765.515625
v 14808.876953 10404.257812 35334.140625
v 12892.633789 10980.540039 31236.458984
v 13023.728516 11186.844727 31666.773438
v 12633.883789 11576.024414 31255.150391
v 12932.338867 11544.140625 31847.224609
v 13415.759766 10768.264648 31447.406250
v 13378.993164 11025.558594 31847.224609
v 13157.853516 11339.668945 32060.029297
v 13059.707031 11732.924805 32202.208984
v 13509.404297 11025.833984 32412.839844
v 13605.966797 10914.106445 32950.804688
v 13221.570312 11544.140625 32404.437500
v 13370.853516 11555.905273 33002.722656
v 12571.630859 12003.754883 31466.496094
v 12667.970703 12178.545898 31770.861328
v 12599.773438 12735.672852 31964.964844
v 12985.818359 12171.524414 32404.437500
v 13101.375977 12385.309570 32742.371094
v 12800.466797 12735.672852 32412.839844
v 13037.160156 12786.401367 32964.488281
v 13163.877930 11992.053711 32595.462891
v 13210.820312 12171.524414 32964.488281
v 13163.877930 12623.592773 33135.628906
v 13738.603516 10678.149414 31513.208984
v 13963.395508 10735.672852 31792.583984
v 14595.525391 10746.520508 31882.966797
v 13953.725586 10738.502930 32446.042969
v 13722.486328 10682.866211 32719.566406
v 14602.201172 10743.147461 32446.042969
v 14803.279297 10690.607422 32727.306641
v 13661.384766 10966.021484 33475.671875
v 13556.612305 11530.090820 33630.921875
v 13644.646484 11709.508789 33987.230469
v 13107.051758 13016.847656 33311.433594
v 13349.197266 12145.788086 33592.609375
v 13562.993164 12132.474609 34183.316406
v 13212.684570 12786.400391 33541.878906
v 13376.497070 12735.671875 34182.492188
v 13660.211914 12320.225586 34618.773438
v 13583.615234 12709.851562 34798.191406
v 13661.291992 12889.266602 35167.000000
v 13765.128906 10966.021484 33770.617188
v 13948.270508 10966.021484 34182.488281
v 13724.322266 11316.253906 33853.093750
v 13803.201172 11530.090820 34183.312500
v 14188.784180 10966.021484 34673.007812
v 14113.839844 11510.564453 34817.710938
v 14242.054688 11676.962891 35186.734375
v 14369.027344 10966.021484 34967.945312
v 14575.840820 10966.021484 35362.253906
v 14304.544922 11283.708984 35044.570312
v 14374.463867 11510.564453 35374.921875
v 13745.156250 11926.970703 34380.484375
v 13834.589844 12132.474609 34798.191406
v 14151.025391 12175.450195 35374.925781
v 13744.628906 12496.011719 35012.027344
v 13871.514648 12709.851562 35363.082031
v 14325.377930 11998.595703 35579.996094
v 15185.408203 8589.856445 31233.074219
v 15185.408203 8619.334961 31822.957031
v 15775.292969 8468.741211 31233.074219
v 15775.292969 8486.139648 31822.957031
v 15155.533203 8750.561523 32376.160156
v 15270.107422 8783.726562 33002.722656
v 14938.988281 8934.279297 32548.333984
v 14975.166016 8958.749023 33002.722656
v 15775.292969 8589.856445 32412.839844
v 15775.292969 8666.192383 33002.722656
v 15002.486328 10551.549805 31953.589844
v 14954.048828 10033.290039 32616.595703
v 14954.048828 10033.290039 32742.681641
v 15091.943359 10363.409180 32417.119141
v 15058.298828 10376.139648 32748.601562
v 16392.322266 8362.112305 31280.796875
v 16365.175781 8408.011719 31822.957031
v 16678.898438 8311.860352 31509.240234
v 16907.339844 8363.530273 31820.675781
v 16365.175781 8574.402344 32412.839844
v 16365.175781 8676.912109 33002.722656
v 16955.058594 8522.458008 32412.839844
v 16955.058594 8546.849609 33002.722656
v 15348.132812 8830.107422 33436.421875
v 15165.066406 9031.425781 33616.871094
v 15170.554688 9318.935547 34184.851562
v 15775.292969 8778.820312 33490.175781
v 15805.218750 9099.803711 33805.601562
v 15808.740234 9328.121094 34095.234375
v 15357.277344 9424.191406 34544.554688
v 15595.681641 9424.191406 34544.554688
v 14964.023438 9523.197266 34383.054688
v 15953.343750 9727.267578 34184.257812
v 16021.421875 10348.992188 34328.367188
v 15170.554688 9624.280273 34753.656250
v 15213.521484 9942.835938 35334.140625
v 15035.634766 10226.375977 35512.031250
v 15800.416016 9701.251953 34773.875000
v 15775.292969 9709.226562 35362.253906
v 16005.152344 10241.628906 34609.945312
v 16342.140625 8731.494141 33604.371094
v 16536.552734 8795.662109 34182.488281
v 16130.156250 8998.388672 33808.843750
v 16287.041016 9195.558594 34136.769531
v 16955.058594 8479.279297 33592.605469
v 16955.058594 8610.557617 34182.488281
v 16632.070312 8873.384766 34505.476562
v 16499.726562 9187.566406 34730.210938
v 16459.386719 9353.078125 35362.253906
v 16947.216797 8786.514648 34730.210938
v 17097.343750 8747.578125 35362.253906
v 16745.361328 8985.067383 34898.734375
v 16802.402344 9058.136719 35362.253906
v 16385.892578 9803.033203 34260.031250
v 16365.175781 10448.667969 34318.523438
v 16709.634766 10010.845703 34407.089844
v 16697.253906 10364.609375 34388.132812
v 16343.855469 9752.526367 34796.156250
v 16164.445312 9564.266602 35362.253906
v 16365.175781 10337.461914 34660.578125
v 16709.634766 10010.845703 34589.113281
v 16709.634766 10262.451172 34589.113281
v 15002.486328 10739.043945 31953.589844
v 15094.625000 10736.698242 32412.839844
v 15050.660156 10690.607422 32727.306641
v 14875.214844 10619.630859 35687.824219
v 14804.367188 10994.133789 35911.527344
v 14864.472656 11209.502930 36294.875000
v 14604.337891 11555.905273 35952.136719
v 14809.900391 11555.905273 36390.867188
v 14272.549805 12391.851562 35704.996094
v 14181.213867 12735.671875 35799.058594
v 14436.958984 12175.450195 35921.832031
v 14747.397461 12145.788086 36500.242188
v 14415.174805 12735.671875 36094.000000
v 14722.985352 12702.834961 36599.210938
v 14851.798828 12877.572266 36849.640625
v 15428.888672 10054.123047 35687.824219
v 15221.843750 10391.746094 35884.449219
v 15408.052734 10557.117188 36381.878906
v 15803.404297 9997.726562 35911.527344
v 16018.771484 10071.404297 36277.707031
v 15625.517578 10163.861328 36081.078125
v 15803.404297 10366.750000 36446.914062
v 16582.214844 9414.851562 35952.136719
v 16648.402344 9460.687500 36277.707031
v 17157.843750 8788.451172 35759.445312
v 16958.751953 9095.921875 35954.500000
v 16955.058594 9345.508789 36380.148438
v 16287.271484 9702.222656 35952.136719
v 16417.134766 9839.369141 36370.183594
v 16365.175781 10376.138672 36629.437500
v 16955.058594 9786.255859 36629.437500
v 16956.441406 10330.802734 36783.042969
v 17153.990234 10497.207031 36849.636719
v 15014.796875 10816.247070 36081.078125
v 15223.671875 10992.041016 36535.007812
v 15066.839844 11555.905273 36685.808594
v 15775.292969 10837.048828 36768.843750
v 15432.550781 11167.833984 36849.636719
v 15361.781250 11555.905273 36855.972656
v 15775.292969 11131.990234 36860.652344
v 15775.292969 11555.905273 36928.476562
v 14957.470703 12145.788086 36795.183594
v 14893.468750 12484.317383 36833.968750
v 15252.412109 12145.788086 36855.976562
v 15128.220703 12702.834961 36859.781250
v 15775.292969 12145.788086 36986.300781
v 15775.292969 12735.671875 36999.992188
v 16365.175781 10894.644531 36793.468750
v 16760.734375 10851.375000 36807.968750
v 16365.175781 11189.585938 36860.652344
v 16365.175781 11555.905273 36975.351562
v 16956.441406 11015.210938 36859.777344
v 16955.058594 11555.905273 36937.484375
v 16365.175781 12145.788086 37087.703125
v 16365.175781 12735.671875 37117.019531
v 16955.058594 12145.788086 37007.640625
v 16955.058594 12735.671875 37023.265625
v 8135.448242 13939.735352 21773.449219
v 8351.166992 14107.711914 22122.421875
v 8553.390625 13987.024414 21794.943359
v 8467.027344 14107.711914 22122.421875
v 8002.052734 14202.749023 23836.214844
v 8853.729492 13536.298828 23700.806641
v 8853.729492 13770.189453 23700.806641
v 8135.448242 14486.277344 21923.441406
v 8351.166992 14276.952148 22122.421875
v 8107.416016 15095.803711 21709.578125
v 8570.148438 14486.277344 21810.951172
v 8467.027344 14276.952148 22122.421875
v 8480.227539 14899.575195 21624.996094
v 8302.946289 14658.505859 23163.789062
v 8152.499023 14437.666992 23572.525391
v 8476.159180 14658.505859 23163.789062
v 8540.752930 14551.308594 23564.593750
v 8476.159180 14915.056641 23163.789062
v 8526.475586 15105.092773 23585.056641
v 9917.666016 13325.556641 22422.027344
v 9939.016602 13915.440430 22433.628906
v 9351.392578 13325.556641 23031.541016
v 9123.437500 13334.024414 23528.343750
v 9359.052734 13915.440430 23052.892578
v 9127.771484 13946.265625 23528.343750
v 9622.724609 13325.556641 22736.599609
v 9644.075195 13915.440430 22757.949219
v 10017.144531 14505.323242 22515.781250
v 10071.996094 15095.206055 22504.177734
v 9464.458984 14396.591797 23160.210938
v 9443.949219 14384.189453 23564.593750
v 9507.618164 15364.261719 23749.119141
v 9700.316406 14558.061523 22968.035156
v 9631.446289 14679.130859 23564.593750
v 9818.278320 15095.206055 22974.708984
v 9648.190430 15138.663086 23557.332031
v 8394.311523 13613.062500 24438.003906
v 8343.724609 13552.645508 24744.359375
v 8198.182617 13985.389648 24151.992188
v 8029.806641 13944.969727 24774.939453
v 8672.938477 13541.416016 24206.617188
v 8696.694336 13480.475586 24744.359375
v 8672.938477 13946.265625 24038.449219
v 8280.114258 13412.019531 25334.242188
v 8273.198242 13267.583984 25877.812500
v 8093.237305 13915.440430 25334.242188
v 8166.144531 13915.440430 25924.125000
v 8638.721680 13184.127930 25337.937500
v 8403.444336 13032.307617 25650.306641
v 8395.307617 14216.826172 23865.978516
v 7859.213867 14244.621094 24991.957031
v 8704.261719 14450.201172 24038.802734
v 8789.813477 15055.212891 24206.968750
v 8915.055664 15225.179688 24466.279297
v 7898.443359 14466.877930 25392.267578
v 8044.191406 14505.323242 25924.125000
v 7812.073242 14805.941406 25627.576172
v 7862.103516 14932.731445 25924.125000
v 9307.538086 13221.895508 24183.517578
v 9308.892578 13238.781250 24770.484375
v 9121.896484 14163.445312 23966.070312
v 9631.431641 13080.528320 24399.505859
v 9631.431641 13080.528320 24591.271484
v 9127.140625 13171.185547 25143.771484
v 9269.223633 14528.089844 24189.927734
v 9286.162109 15055.545898 24265.607422
v 9120.069336 15118.951172 24462.064453
v 9637.671875 14649.169922 24031.355469
v 9637.671875 14971.005859 24031.355469
v 8071.203125 15725.023438 21844.599609
v 8142.398438 15948.950195 22284.525391
v 8038.656250 16046.523438 22362.382812
v 8696.694336 15828.249023 21794.943359
v 8696.694336 15932.104492 22359.923828
v 8109.161133 15760.002930 23080.359375
v 8138.601562 15759.432617 23515.371094
v 8016.496094 16146.259766 22974.708984
v 8696.694336 15751.147461 22974.708984
v 8562.139648 15622.600586 23682.958984
v 9257.291992 15817.000000 21798.449219
v 9067.480469 15950.378906 22393.042969
v 9434.395508 16118.033203 21997.416016
v 9303.433594 16122.173828 22393.042969
v 9967.040039 15748.541016 21769.537109
v 10095.095703 15658.304688 22348.578125
v 9816.880859 16180.808594 21941.419922
v 9788.822266 16295.111328 22384.826172
v 9273.730469 15764.615234 22946.253906
v 9301.224609 15464.871094 23557.332031
v 9461.793945 16078.932617 22730.652344
v 9777.176758 15648.071289 22946.253906
v 9626.067383 15426.763672 23355.861328
v 9745.740234 16201.678711 22717.931641
v 8195.040039 16459.341797 24665.058594
v 8607.791992 15686.920898 24153.841797
v 8787.999023 15626.682617 24462.064453
v 8455.275391 16310.998047 24689.835938
v 7832.907227 15944.807617 26090.390625
v 8088.172852 16527.058594 25310.523438
v 7902.720703 16306.511719 25905.908203
v 8603.732422 16492.781250 25336.740234
v 8040.513672 16901.292969 24117.919922
v 8157.206055 16746.316406 24720.751953
v 7974.389648 17454.738281 24233.099609
v 8269.331055 17454.738281 24613.162109
v 8501.770508 16864.855469 24847.402344
v 8517.324219 17454.738281 24908.103516
v 8204.596680 16652.210938 25924.125000
v 8563.132812 16786.132812 25385.482422
v 8622.541016 16871.703125 25865.138672
v 8812.308594 17474.613281 25292.449219
v 8933.309570 17278.835938 25924.125000
v 9188.370117 15520.518555 24154.476562
v 9131.221680 15508.900391 24466.279297
v 9478.835938 17728.941406 25011.804688
v 9650.681641 17728.941406 25011.804688
v 9283.956055 17660.679688 25292.449219
v 9286.577148 17506.656250 25924.125000
v 9858.969727 17649.857422 25304.949219
v 9876.459961 17557.718750 25924.125000
v 10515.533203 13325.556641 21866.285156
v 10220.591797 13325.556641 22127.085938
v 10544.534180 13915.440430 21962.865234
v 10249.592773 13915.440430 22138.687500
v 10810.474609 13325.556641 21571.343750
v 10833.760742 13915.440430 21667.921875
v 10738.783203 13275.202148 23805.708984
v 10696.109375 13915.440430 23771.792969
v 10997.238281 13275.202148 23711.884766
v 11056.226562 13915.440430 23654.511719
v 10651.846680 14274.383789 22059.917969
v 10459.667969 14484.736328 22239.169922
v 10638.786133 15301.341797 21748.449219
v 10417.594727 15133.183594 22229.890625
v 10997.846680 14489.161133 21859.320312
v 11056.226562 14628.549805 22201.189453
v 10961.203125 15158.176758 21813.509766
v 11028.489258 15133.183594 22223.451172
v 10676.664062 14305.539062 23802.181641
v 11056.226562 14406.832031 23757.878906
v 11646.109375 13325.556641 23640.597656
v 11646.109375 13915.440430 23624.970703
v 12072.176758 13325.556641 23757.878906
v 12221.591797 13974.428711 23720.410156
v 11384.999023 14703.935547 22051.980469
v 11384.999023 14703.935547 22164.087891
v 11404.966797 15095.206055 22033.029297
v 11404.966797 15095.206055 22201.189453
v 11617.529297 14546.401367 23718.796875
v 11744.597656 15078.761719 23800.894531
v 12332.962891 14408.353516 23704.503906
v 12235.993164 14961.713867 23742.251953
v 10712.518555 13262.465820 24059.876953
v 10701.254883 13086.672852 24528.769531
v 10696.109375 13915.440430 23949.921875
v 10839.565430 13378.392578 24160.046875
v 11059.863281 13300.203125 24529.755859
v 10939.197266 13915.440430 24244.863281
v 11234.138672 13915.440430 24474.710938
v 10676.664062 14305.539062 23972.621094
v 11122.647461 14513.221680 24123.664062
v 11287.381836 14357.500000 24466.279297
v 11730.178711 13325.556641 24363.548828
v 11435.236328 13325.556641 24490.326172
v 11745.803711 13915.440430 24411.316406
v 11450.862305 13915.440430 24474.710938
v 12072.176758 13325.556641 24068.607422
v 12221.591797 13974.428711 24082.210938
v 11561.131836 14623.033203 24225.636719
v 11438.143555 14468.191406 24462.064453
v 11627.790039 14985.929688 24054.716797
v 12332.962891 14408.353516 24112.802734
v 12235.993164 14961.713867 24073.441406
v 10364.260742 15533.605469 21727.869141
v 10188.467773 15443.819336 22127.785156
v 11146.465820 15591.872070 21913.912109
v 11206.625977 15529.726562 22164.087891
v 11379.592773 15642.302734 22001.777344
v 11389.067383 15529.726562 22164.087891
v 10466.343750 17624.837891 25424.035156
v 10466.343750 17499.996094 25924.125000
v 11056.226562 17577.960938 25439.589844
v 11056.226562 17476.628906 25924.125000
v 11844.921875 17106.523438 25502.787109
v 11844.921875 17106.523438 25701.886719
v 11647.420898 17426.289062 25401.669922
v 11617.583008 17454.246094 25924.011719
v 12235.993164 17073.054688 25454.251953
v 12235.993164 17073.054688 25714.873047
v 12251.344727 17470.093750 25413.400391
v 12251.344727 17470.093750 25771.951172
v 8211.662109 13325.556641 26514.009766
v 8280.031250 13361.034180 27126.863281
v 8298.199219 13925.910156 26554.058594
v 8351.166992 13736.262695 26945.548828
v 8433.001953 13581.313477 27338.804688
v 8413.657227 14129.517578 26777.386719
v 8514.558594 13925.909180 27126.863281
v 7922.487305 13345.811523 28239.302734
v 7853.741211 13747.194336 28406.359375
v 8664.854492 13403.630859 27753.529297
v 8881.889648 13383.766602 28288.533203
v 8828.773438 13915.439453 27571.345703
v 8931.917969 13663.653320 28488.410156
v 8262.432617 14498.194336 26554.058594
v 8349.991211 14690.070312 26898.322266
v 7938.976562 15138.785156 26564.113281
v 8222.490234 15088.070312 27098.527344
v 8413.657227 14296.813477 26777.386719
v 8535.160156 14498.193359 27098.527344
v 8467.338867 14886.684570 27291.578125
v 8351.166992 15279.939453 27483.142578
v 8854.524414 14505.322266 27462.937500
v 8695.223633 15124.986328 27654.470703
v 8673.105469 15086.498047 28285.375000
v 8992.930664 13619.202148 27970.343750
v 9271.589844 13807.530273 28241.806641
v 9116.874023 13915.439453 27866.287109
v 9841.810547 13303.407227 28364.824219
v 9876.459961 13915.439453 28262.173828
v 9211.734375 14505.322266 27757.878906
v 9506.675781 14505.322266 28077.240234
v 9119.412109 14970.033203 27825.800781
v 9304.254883 15138.079102 28118.630859
v 9894.333008 14485.700195 28399.099609
v 9754.993164 15095.205078 28439.445312
v 8195.286133 13326.282227 28885.314453
v 8304.651367 13523.395508 29286.419922
v 7896.831055 13932.468750 28911.208984
v 8126.541016 13884.022461 29475.197266
v 8662.370117 13353.836914 29520.994141
v 8931.917969 13663.653320 28737.113281
v 8696.694336 13734.214844 29697.250000
v 8236.591797 14059.705078 29876.302734
v 8886.432617 13231.955078 30053.308594
v 8973.584961 13145.406250 30375.216797
v 8696.694336 14029.156250 29860.347656
v 8089.348633 14493.327148 28930.470703
v 7870.173828 14500.576172 29420.617188
v 7892.400391 15095.205078 29554.539062
v 8632.673828 14670.794922 28937.562500
v 8819.177734 14569.903320 29463.425781
v 8632.673828 14815.661133 28937.562500
v 8819.177734 14928.707031 29463.425781
v 8179.538086 14505.322266 29945.171875
v 8191.491211 15115.454102 30073.001953
v 8337.198242 15325.580078 30433.638672
v 8683.205078 14522.333984 29990.236328
v 8683.205078 15020.767578 30118.876953
v 8723.480469 15142.442383 30442.013672
v 9283.379883 13303.407227 28736.777344
v 9286.577148 13560.812500 29754.171875
v 9084.621094 13663.653320 28737.113281
v 9286.577148 13776.330078 29754.171875
v 9622.082031 13092.012695 28629.376953
v 9618.145508 13583.881836 29755.570312
v 9618.145508 13722.603516 29755.570312
v 9286.577148 13420.506836 30053.308594
v 9285.016602 13330.332031 30624.570312
v 9286.577148 14071.271484 29832.300781
v 9471.227539 13663.869141 30873.927734
v 9682.355469 13514.106445 30053.308594
v 9679.340820 13515.258789 30480.671875
v 9740.532227 13917.713867 30042.644531
v 9802.119141 13882.474609 30663.654297
v 8994.419922 14655.721680 29147.132812
v 9079.084961 14569.903320 29463.425781
v 8994.419922 14821.614258 29147.132812
v 9079.084961 14928.707031 29463.425781
v 10102.875000 14669.247070 28630.361328
v 10049.934570 15095.205078 28706.908203
v 9340.310547 14516.735352 30004.283203
v 9429.286133 14791.866211 30420.689453
v 9219.706055 15031.973633 30053.308594
v 9283.403320 15076.411133 30419.794922
v 9712.091797 14395.811523 30232.162109
v 9789.619141 14557.592773 30590.919922
v 9693.210938 15095.205078 30673.902344
v 7826.636719 15718.474609 26596.091797
v 7891.599609 15685.502930 27092.929688
v 7935.649414 16215.984375 26519.833984
v 7951.304688 16312.242188 27149.724609
v 8093.483398 15762.976562 27703.128906
v 8229.055664 15953.159180 28006.658203
v 8020.564453 16286.937500 28231.849609
v 8529.853516 15559.904297 27876.396484
v 8714.566406 15727.954102 28069.523438
v 8696.694336 16274.971680 28193.523438
v 8235.847656 16736.152344 26514.009766
v 8271.194336 16828.707031 27103.892578
v 8744.852539 17048.201172 26527.568359
v 8639.310547 17122.246094 27054.244141
v 8973.584961 17187.076172 26339.978516
v 8797.683594 17195.021484 27217.771484
v 8148.094727 16910.287109 27693.121094
v 8078.887695 16779.867188 28357.964844
v 7957.912109 17352.765625 27951.009766
v 7949.741211 17511.531250 28226.867188
v 8639.310547 17091.628906 27748.054688
v 8696.694336 16781.652344 28099.121094
v 8797.683594 17195.021484 27587.611328
v 9286.577148 15685.088867 28232.056641
v 9286.577148 16274.971680 28310.341797
v 9736.316406 15685.088867 28439.445312
v 9673.813477 16274.971680 28472.556641
v 9006.024414 17145.408203 26733.234375
v 9006.024414 17145.408203 26824.515625
v 9236.222656 17395.218750 26527.568359
v 9280.132812 17471.810547 27013.900391
v 9876.459961 17634.955078 26514.009766
v 9876.459961 17717.691406 26857.447266
v 9023.102539 17151.949219 27980.867188
v 9291.407227 16890.453125 28299.076172
v 9288.670898 17467.035156 27782.847656
v 9441.293945 17369.445312 28283.658203
v 9601.379883 16628.960938 28540.392578
v 9592.152344 17739.046875 27978.083984
v 9662.788086 17664.386719 28283.658203
v 7853.741211 15471.419922 29656.257812
v 7814.556641 16567.226562 29570.355469
v 7927.498047 15674.863281 30088.533203
v 8255.361328 15740.702148 30611.716797
v 8028.863281 16095.536133 30613.177734
v 8694.870117 15740.702148 30640.667969
v 8841.428711 15982.766602 30710.269531
v 7924.740234 16839.812500 28814.554688
v 7924.740234 17438.667969 28823.951172
v 7916.243164 17231.324219 29216.285156
v 7814.556641 16713.269531 29841.595703
v 10031.257812 15685.088867 28811.300781
v 9962.501953 16219.388672 28929.125000
v 10103.417969 16415.339844 29463.425781
v 9308.374023 15694.254883 30636.792969
v 9126.276367 15983.678711 30782.650391
v 9653.454102 15503.738281 30771.255859
v 10158.728516 16554.765625 29771.039062
v 9559.712891 17022.214844 28632.845703
v 9559.712891 17253.335938 28632.845703
v 9698.321289 16841.294922 28847.101562
v 9946.504883 16864.855469 29463.425781
v 9707.480469 17451.873047 28847.101562
v 9819.331055 17454.738281 29463.425781
v 10110.339844 16864.855469 29895.458984
v 10011.588867 17411.654297 30096.390625
v 10093.430664 17579.560547 30539.201172
v 10514.689453 13373.909180 28389.826172
v 10323.526367 13915.439453 28488.978516
v 10940.186523 13209.514648 28489.898438
v 10195.344727 14275.991211 28554.658203
v 10743.547852 13602.771484 28596.337891
v 10618.467773 13915.439453 28715.701172
v 11172.861328 13442.190430 28829.853516
v 11346.100586 13615.428711 29227.896484
v 11013.135742 13856.450195 29020.119141
v 11216.354492 13913.785156 29440.083984
v 11296.610352 14109.310547 29859.435547
v 10444.044922 14472.613281 28883.640625
v 10692.746094 14669.234375 29261.921875
v 10297.990234 15095.205078 29001.849609
v 10599.340820 15113.078125 29460.500000
v 10792.847656 14275.979492 29136.919922
v 10913.969727 14485.693359 29460.500000
v 10842.125977 14928.364258 29655.177734
v 10715.848633 15321.620117 29802.291016
v 11225.818359 14548.901367 30054.958984
v 11312.595703 14774.581055 30373.931641
v 10927.363281 15113.078125 30020.675781
v 11172.020508 15068.420898 30599.613281
v 11427.585938 13321.754883 29004.990234
v 11528.198242 13381.502930 29440.083984
v 11400.768555 13716.055664 29621.150391
v 11664.192383 13325.555664 30053.308594
v 11797.018555 13325.555664 30643.191406
v 11628.648438 13954.037109 30097.882812
v 11851.409180 13963.410156 30638.833984
v 11959.413086 14192.018555 30336.332031
v 11959.413086 14192.018555 30439.302734
v 11646.109375 14466.797852 30267.642578
v 11692.878906 14609.712891 30577.824219
v 11538.890625 14840.519531 30681.714844
v 11959.413086 14381.326172 30336.332031
v 11954.823242 14486.060547 30435.800781
v 10466.343750 17578.105469 26514.009766
v 10460.625977 17712.292969 26988.464844
v 11019.919922 17656.171875 26478.412109
v 10799.088867 17728.941406 26847.931641
v 11390.244141 17697.800781 26258.052734
v 10205.947266 15685.088867 29106.242188
v 10370.231445 15685.088867 29463.425781
v 10176.766602 15985.706055 29162.806641
v 10226.316406 16120.395508 29463.425781
v 10641.998047 15690.453125 30020.675781
v 10736.682617 15890.657227 30458.445312
v 10361.702148 16324.870117 30001.923828
v 10658.797852 16267.713867 30650.320312
v 10799.184570 15497.401367 30195.546875
v 10855.592773 15690.453125 30650.320312
v 10785.214844 16066.246094 30851.699219
v 10233.625000 16864.853516 30190.400391
v 10427.621094 16864.853516 30643.191406
v 10177.078125 17186.306641 30321.740234
v 10231.369141 17411.654297 30698.773438
v 7812.073242 18325.185547 23802.183594
v 7812.073242 18502.550781 23802.183594
v 8062.772461 18066.746094 24186.214844
v 8313.471680 17808.306641 24537.794922
v 8053.693359 18694.025391 24238.300781
v 8101.935547 18858.792969 24747.091797
v 8500.965820 18201.562500 24445.447266
v 8702.112305 17975.669922 24744.837891
v 8500.965820 18492.242188 24445.447266
v 8697.234375 18544.878906 24750.900391
v 8106.810547 18831.230469 25334.244141
v 8115.157227 18871.761719 25900.191406
v 8903.258789 17749.777344 25067.958984
v 8696.694336 18733.777344 25334.244141
v 8746.458008 18885.933594 25900.191406
v 7902.058594 19011.488281 24424.408203
v 7902.058594 19011.488281 24552.281250
v 8317.347656 18952.957031 26080.863281
v 8583.006836 18952.957031 26080.863281
v 9290.751953 18019.324219 25103.677734
v 9102.667969 18388.097656 24951.886719
v 9650.681641 17895.615234 25011.804688
v 9294.208008 18542.378906 25335.310547
v 9286.577148 18779.599609 25924.126953
v 9868.246094 18102.660156 25310.722656
v 10085.808594 18309.703125 25693.945312
v 9692.553711 18450.585938 25532.648438
v 9884.092773 18514.027344 25903.994141
v 10466.343750 17982.433594 25424.037109
v 10523.970703 18288.453125 25903.994141
v 10365.761719 18403.343750 26087.199219
v 11056.226562 17919.933594 25439.589844
v 11056.226562 18134.230469 25924.126953
v 11646.109375 17843.578125 25439.589844
v 11610.567383 17879.621094 25939.355469
v 12064.952148 17791.445312 25502.787109
v 12064.952148 17791.445312 25752.880859
v 7924.092773 18890.455078 26372.527344
v 8976.261719 18914.074219 26328.076172
v 7812.073242 17765.437500 28385.632812
v 8115.157227 18952.121094 26547.097656
v 8106.810547 19037.925781 27103.894531
v 8746.458008 18964.621094 26520.425781
v 8696.694336 19100.427734 27103.894531
v 8106.810547 19203.109375 27693.777344
v 8106.810547 19359.367188 28283.660156
v 8748.721680 19345.222656 27710.556641
v 8748.721680 19431.054688 28233.888672
v 8980.034180 19530.925781 27918.369141
v 8980.034180 19530.925781 28004.076172
v 9554.240234 17756.125000 27203.287109
v 9267.660156 18820.328125 26520.425781
v 9451.677734 18843.613281 26959.638672
v 10167.742188 18335.904297 26785.632812
v 10001.294922 18012.652344 27007.275391
v 9933.252930 18513.890625 26559.007812
v 9928.851562 18662.671875 27083.343750
v 9554.240234 17756.125000 27584.828125
v 9823.852539 17803.664062 27746.382812
v 9957.729492 17851.148438 28283.658203
v 10083.216797 18874.986328 27445.341797
v 9058.421875 18952.957031 26721.330078
v 9267.660156 19051.535156 27135.318359
v 9689.961914 18981.736328 27352.894531
v 9289.507812 19337.490234 27710.556641
v 9254.895508 19563.566406 28257.406250
v 9094.833984 19530.925781 27918.369141
v 9882.538086 19076.535156 27662.693359
v 9876.459961 19369.033203 28228.728516
v 9876.459961 19595.828125 28523.669922
v 7812.073242 17765.437500 28594.261719
v 8106.810547 19478.412109 28705.060547
v 8106.810547 19656.394531 29000.001953
v 8106.810547 19951.337891 29299.042969
v 8696.694336 19476.324219 28801.054688
v 8696.694336 19578.269531 29095.996094
v 8696.694336 19873.210938 29386.757812
v 9991.797852 17893.273438 28873.541016
v 9955.992188 18056.892578 29451.156250
v 10072.595703 18473.796875 29639.603516
v 9874.984375 18044.619141 30053.310547
v 10018.551758 17989.037109 30698.775391
v 9981.050781 18656.054688 29997.468750
v 9859.358398 18634.503906 30643.193359
v 9021.702148 19510.101562 28728.296875
v 9245.628906 19649.021484 28904.371094
v 9284.092773 19895.343750 29503.414062
v 10051.761719 19348.781250 29644.966797
v 9935.449219 19817.894531 28848.832031
v 9863.664062 19695.214844 29454.375000
v 9479.064453 20006.748047 29845.255859
v 9517.923828 19983.115234 30790.988281
v 9948.899414 19181.044922 29997.468750
v 9767.457031 19224.386719 30643.193359
v 9705.796875 19811.779297 30046.455078
v 9676.925781 19797.599609 30613.892578
v 8106.810547 20324.568359 29593.984375
v 8696.694336 20246.296875 29681.699219
v 8106.810547 20619.509766 29803.957031
v 8106.810547 20994.037109 29982.210938
v 8696.694336 20541.238281 29850.833984
v 8694.203125 21004.044922 30142.275391
v 8911.527344 21183.998047 30614.546875
v 8054.317383 21581.419922 30248.529297
v 8215.950195 21776.382812 30429.882812
v 7822.694336 21889.482422 30337.630859
v 8054.317383 22121.187500 30564.175781
v 8495.914062 21383.126953 30274.923828
v 8656.724609 21532.679688 30610.980469
v 8466.486328 22173.802734 30828.292969
v 9085.808594 20179.767578 29726.697266
v 9313.675781 20429.859375 30038.710938
v 9415.571289 20451.656250 30613.892578
v 9148.287109 20814.089844 30232.164062
v 9099.796875 20948.044922 30614.546875
v 9646.589844 20286.697266 30238.511719
v 9646.589844 20286.697266 30397.732422
v 10563.522461 18298.953125 26503.486328
v 10464.642578 18387.398438 26350.751953
v 10466.343750 18489.425781 27196.126953
v 10976.815430 18051.527344 26436.324219
v 10860.606445 18397.214844 27320.347656
v 10510.736328 17820.703125 27614.250000
v 10466.343750 17960.671875 28283.658203
v 10466.343750 18784.367188 27493.074219
v 10881.120117 18020.746094 27657.333984
v 10977.124023 18154.144531 28283.660156
v 10895.218750 18610.107422 27682.279297
v 11048.634766 18639.128906 28295.408203
v 10466.343750 19014.406250 27788.017578
v 10489.324219 19205.691406 28292.722656
v 10217.362305 19544.449219 28573.226562
v 10784.783203 18956.714844 27871.238281
v 10815.456055 18973.378906 28238.771484
v 11390.244141 17841.050781 26258.052734
v 10507.286133 18163.066406 28914.486328
v 10337.954102 18261.699219 29246.349609
v 10719.779297 18606.062500 29139.480469
v 10434.377930 18628.761719 29404.044922
v 10948.668945 18247.203125 28745.154297
v 11038.753906 18618.152344 28830.625000
v 10176.766602 17755.353516 30932.455078
v 10176.646484 18867.052734 29763.613281
v 10633.209961 19201.189453 28962.724609
v 10416.225586 19191.253906 29406.722656
v 10277.125000 19705.527344 28848.832031
v 10301.647461 19607.910156 29251.708984
v 10919.333984 19019.585938 28831.501953
v 10176.646484 18955.527344 29763.613281
v 12557.496094 14507.339844 23744.269531
v 12566.349609 14840.828125 23781.345703
v 12557.496094 14507.339844 23966.078125
v 12566.349609 14840.828125 23972.921875
v 12560.876953 17097.416016 25522.335938
v 12560.876953 17097.416016 25670.732422
v 12560.876953 17283.703125 25522.335938
v 12560.876953 17283.703125 25670.732422
v 9431.708008 13325.555664 31197.335938
v 9554.335938 14080.744141 31587.519531
v 9603.247070 13325.555664 31492.277344
v 9734.354492 13325.555664 31822.957031
v 9706.177734 13896.645508 31799.669922
v 9953.112305 13325.555664 32412.839844
v 10121.716797 13272.686523 32973.957031
v 10042.133789 13962.567383 32464.548828
v 10155.932617 13797.359375 32758.152344
v 9503.934570 14505.322266 31451.507812
v 9503.934570 14505.322266 31676.720703
v 9432.827148 15095.205078 31498.376953
v 9432.827148 15095.205078 31766.683594
v 9743.714844 14505.322266 31156.566406
v 9693.454102 14505.322266 31971.662109
v 9693.210938 15095.205078 31203.433594
v 9632.724609 15095.205078 32061.625000
v 10019.776367 14536.530273 32464.548828
v 10162.701172 14753.962891 32716.484375
v 9898.989258 15095.205078 32412.839844
v 10142.724609 15095.205078 32752.083984
v 10161.200195 13040.814453 33328.699219
v 10135.097656 13070.024414 34333.863281
v 9524.632812 13325.554688 35620.703125
v 9555.883789 13915.438477 35641.089844
v 10054.444336 13205.944336 34772.375000
v 9863.664062 13383.184570 35275.433594
v 9876.459961 13915.438477 35424.769531
v 9524.632812 14505.321289 35625.464844
v 9462.139648 15095.204102 35609.835938
v 9876.459961 14505.321289 35488.386719
v 9876.459961 15095.204102 35472.761719
v 8351.382812 15894.629883 30988.513672
v 8135.577148 16320.228516 31094.474609
v 8693.958008 15915.979492 30978.654297
v 8793.183594 16178.482422 31057.441406
v 8078.554688 16859.986328 31387.451172
v 8256.345703 17053.369141 31601.705078
v 7863.089844 17345.236328 31476.806641
v 8078.554688 17507.013672 31685.833984
v 8795.007812 16822.041016 31237.365234
v 8748.970703 17064.154297 31808.181641
v 8579.313477 17454.736328 32011.841797
v 8980.451172 17148.611328 32129.085938
v 8874.254883 17454.736328 32143.687500
v 9383.367188 15741.883789 31230.222656
v 9478.250977 15685.088867 31800.986328
v 9182.064453 16178.482422 31156.070312
v 9449.077148 16239.745117 31874.671875
v 9653.454102 15503.738281 31125.412109
v 9601.473633 15685.088867 32095.927734
v 9593.639648 16019.633789 32105.777344
v 9507.822266 16412.888672 32274.921875
v 9831.411133 15685.088867 32412.839844
v 10106.397461 15685.088867 32825.230469
v 9696.248047 16239.745117 32448.066406
v 10010.780273 16274.971680 32903.355469
v 9030.807617 16818.343750 31209.837891
v 9132.798828 16825.123047 31822.957031
v 9313.617188 16899.896484 32398.630859
v 9512.666992 17044.439453 32781.472656
v 9152.058594 17454.736328 32438.628906
v 9447.000000 17454.736328 32903.292969
v 9621.123047 16651.185547 32668.177734
v 9865.221680 16858.228516 33018.527344
v 9689.655273 17454.736328 33198.234375
v 8983.678711 17720.982422 35649.242188
v 9430.897461 15685.087891 35605.074219
v 9397.783203 16274.970703 35589.449219
v 9876.459961 15685.087891 35452.375000
v 9876.459961 16274.970703 35421.125000
v 10109.319336 17065.273438 33371.339844
v 9984.596680 17454.736328 33477.605469
v 9335.281250 16864.853516 35573.824219
v 9235.314453 17496.507812 35573.226562
v 9876.459961 16864.853516 35389.871094
v 9876.459961 17454.736328 35358.621094
v 10218.434570 13434.069336 33151.410156
v 10176.766602 14190.614258 32695.648438
v 10253.086914 13962.566406 32973.957031
v 11249.916992 15245.230469 31233.074219
v 11317.445312 15339.877930 31578.283203
v 10176.766602 14360.708008 32695.648438
v 10278.080078 14536.530273 32948.957031
v 10300.726562 15095.204102 33047.027344
v 11923.805664 13325.555664 31032.228516
v 11888.911133 13924.742188 31248.779297
v 11919.029297 14127.572266 31589.990234
v 12048.000000 13325.555664 31327.169922
v 12336.845703 13277.830078 31870.685547
v 11981.532227 13734.317383 31455.876953
v 12074.991211 13924.742188 31801.152344
v 12458.111328 13442.639648 32295.757812
v 12360.421875 13880.212891 32460.568359
v 12457.247070 14053.356445 32843.972656
v 11706.155273 14505.322266 31233.074219
v 11839.931641 14514.619141 31801.152344
v 11459.872070 14950.289062 31233.074219
v 11541.476562 15124.033203 31794.130859
v 12000.001953 14324.189453 31983.246094
v 11899.899414 14717.445312 32242.375000
v 11803.459961 15062.946289 32428.539062
v 11879.077148 15238.067383 32853.097656
v 12061.972656 14514.619141 32428.539062
v 12323.820312 14501.289062 33025.449219
v 11960.697266 14844.812500 32635.630859
v 12025.890625 15062.945312 33030.925781
v 10257.672852 13272.686523 33552.242188
v 10282.667969 13290.213867 34155.339844
v 10451.419922 13915.438477 33592.609375
v 10548.873047 13915.438477 34182.492188
v 10239.620117 13500.885742 34772.375000
v 10173.668945 13618.230469 35069.585938
v 10449.575195 13915.438477 34772.375000
v 10254.039062 13915.438477 35145.941406
v 10543.138672 14505.321289 33592.609375
v 10704.500977 14519.009766 34175.691406
v 10561.906250 15095.204102 33592.609375
v 10727.522461 15095.204102 33983.722656
v 10778.350586 14724.763672 34367.792969
v 10818.134766 15095.204102 34278.667969
v 10677.570312 14519.009766 34788.195312
v 10380.150391 14505.321289 35225.183594
v 10735.074219 14872.209961 34995.371094
v 10509.605469 15079.383789 35230.917969
v 10778.350586 14724.763672 34602.113281
v 10842.004883 15079.383789 34788.195312
v 10820.019531 15265.465820 35129.496094
v 12436.413086 14695.227539 33392.187500
v 12323.820312 15097.479492 33590.332031
v 12457.247070 15295.624023 33982.074219
v 10734.414062 16459.501953 31087.523438
v 11032.599609 15685.088867 31233.074219
v 11243.035156 15713.908203 31794.130859
v 10833.623047 16267.713867 31263.720703
v 11018.828125 16274.971680 31822.957031
v 10297.018555 15685.087891 33120.167969
v 10279.533203 16274.970703 33198.296875
v 11321.729492 15929.750000 32189.013672
v 11243.035156 16291.297852 32396.519531
v 11317.445312 16498.810547 32778.898438
v 10665.767578 16845.224609 31263.720703
v 10740.006836 17048.220703 31822.957031
v 10453.264648 17454.736328 31233.074219
v 10640.600586 17454.736328 31822.957031
v 10778.350586 16635.509766 31480.779297
v 10833.760742 16753.279297 31822.957031
v 10757.516602 17142.058594 32135.638672
v 10231.833008 16672.017578 33255.582031
v 10724.380859 17454.736328 32245.171875
v 10964.108398 16913.201172 32364.494141
v 11250.079102 16864.853516 32899.421875
v 10850.834961 17454.736328 32540.113281
v 11163.711914 17428.083984 33054.378906
v 11421.603516 15536.494141 31971.537109
v 11503.982422 15713.908203 32396.519531
v 11789.937500 15669.382812 33030.925781
v 11400.768555 16105.555664 32582.267578
v 11515.453125 16291.296875 32986.402344
v 11960.697266 15462.285156 33246.351562
v 11409.944336 16864.853516 33194.363281
v 11359.101562 17213.685547 33285.441406
v 10558.197266 15685.087891 33592.609375
v 10727.522461 15685.087891 33960.062500
v 10507.597656 16274.970703 33592.609375
v 10694.408203 16274.970703 34006.941406
v 10849.385742 15685.087891 34255.003906
v 10833.760742 16274.970703 34301.878906
v 10473.069336 15694.268555 35454.371094
v 10335.686523 16274.970703 35488.875000
v 10953.112305 15685.087891 34772.375000
v 10879.505859 15694.268555 35340.578125
v 10968.738281 16274.970703 34772.375000
v 11031.240234 16274.970703 35362.257812
v 10330.123047 16867.128906 33577.824219
v 10619.421875 16864.853516 34090.050781
v 10248.224609 17454.736328 33772.546875
v 10580.079102 17482.013672 34223.253906
v 10802.508789 16864.853516 34384.992188
v 11312.595703 17606.941406 33357.164062
v 10778.350586 17303.570312 34447.058594
v 10335.686523 16864.853516 35473.250000
v 10750.100586 17696.826172 34488.714844
v 10335.686523 17454.736328 35457.625000
v 10953.112305 16864.853516 34772.375000
v 11093.742188 16864.853516 35362.257812
v 10879.505859 17482.013672 34720.156250
v 11078.117188 17454.736328 35362.257812
v 11898.194336 15855.541016 33401.308594
v 11838.909180 16321.774414 33595.808594
v 11939.863281 16549.605469 33905.382812
v 12053.404297 15669.382812 33595.808594
v 12376.853516 15687.362305 34180.214844
v 11985.719727 16156.348633 33794.566406
v 12149.411133 16321.774414 34134.207031
v 12499.779297 15885.506836 34516.101562
v 12462.941406 16274.970703 34566.687500
v 11659.368164 16864.853516 33592.609375
v 11895.534180 16864.853516 33954.253906
v 11495.477539 17428.083984 33569.316406
v 11820.546875 17454.736328 34016.757812
v 12122.418945 16864.853516 34249.199219
v 12059.997070 17454.736328 34311.699219
v 12417.360352 16864.853516 34613.566406
v 12359.966797 17470.091797 34774.089844
v 12480.649414 17676.957031 35180.097656
v 8249.205078 13325.554688 36163.718750
v 7954.263672 13325.554688 36389.152344
v 8217.224609 13915.438477 36142.367188
v 7922.283203 13915.438477 36342.285156
v 8696.694336 13325.554688 35964.132812
v 8696.694336 13915.438477 35929.242188
v 8170.347656 14505.321289 36123.097656
v 7875.406250 14505.321289 36282.996094
v 8061.028320 15089.365234 36095.910156
v 7833.879883 14888.843750 36252.328125
v 8696.694336 14505.321289 35907.882812
v 8696.694336 15095.204102 35871.339844
v 9229.691406 13325.554688 35752.554688
v 9260.942383 13915.438477 35739.019531
v 9229.691406 14505.321289 35736.929688
v 9167.198242 15095.204102 35734.843750
v 8106.810547 15685.087891 35968.738281
v 8106.810547 16274.970703 35921.863281
v 8696.694336 15685.087891 35812.484375
v 8696.694336 16274.970703 35765.605469
v 8106.810547 16864.853516 35890.613281
v 8104.059570 17513.724609 35793.929688
v 8696.694336 16864.853516 35749.980469
v 8750.908203 17496.507812 35700.367188
v 9135.956055 15685.087891 35719.214844
v 9102.841797 16274.970703 35687.964844
v 9040.339844 16864.853516 35672.339844
v 9004.512695 17327.728516 35667.292969
v 10674.179688 15897.017578 35740.214844
v 10614.923828 16284.151367 35942.960938
v 10691.558594 16486.900391 36392.597656
v 10820.019531 15897.017578 35740.214844
v 10917.007812 16284.151367 35942.960938
v 10840.852539 16486.900391 36392.597656
v 10513.003906 16864.853516 35952.140625
v 10614.923828 16834.271484 36570.347656
v 10499.970703 17454.736328 35952.140625
v 10499.970703 17454.736328 36542.023438
v 11093.742188 16864.853516 35952.140625
v 10942.008789 16834.271484 36570.347656
v 11124.993164 17454.736328 35952.140625
v 11103.247070 17454.736328 36542.023438
v 10674.179688 17010.511719 36965.417969
v 10627.372070 17449.162109 37149.988281
v 10712.306641 17642.074219 37451.222656
v 10861.686523 17010.511719 36965.417969
v 10924.612305 17449.162109 37149.988281
v 10820.019531 17642.074219 37451.222656
v 8103.613281 18016.416016 31959.347656
v 7904.854492 18495.037109 32057.558594
v 8453.057617 17800.982422 32099.429688
v 8298.110352 18194.240234 32161.933594
v 8117.593750 18681.248047 32346.703125
v 8330.333984 18867.458984 32769.769531
v 8685.455078 18024.091797 32348.144531
v 8917.851562 18247.201172 32790.589844
v 8524.596680 18474.203125 32555.189453
v 8711.413086 18656.298828 32887.328125
v 7921.794922 19224.386719 32559.533203
v 8229.052734 19249.150391 32980.929688
v 7833.227539 19561.511719 32686.425781
v 7940.130859 19780.591797 33023.902344
v 8696.694336 19038.230469 33165.050781
v 10093.430664 18148.611328 31087.416016
v 10018.551758 18628.923828 31263.656250
v 10114.263672 18821.830078 31614.798828
v 9077.755859 17853.945312 32534.353516
v 9282.329102 18013.673828 33039.312500
v 9070.231445 18634.503906 33180.664062
v 9591.155273 17780.150391 33288.027344
v 9517.923828 19983.115234 31131.761719
v 9807.646484 19224.386719 31233.076172
v 10013.264648 19232.724609 31816.041016
v 9634.333984 19797.599609 31290.263672
v 9779.860352 19814.269531 31822.958984
v 8994.419922 18934.904297 33255.480469
v 10105.451172 19434.912109 32177.404297
v 10031.561523 19833.689453 32389.554688
v 10126.289062 20043.265625 32773.730469
v 8216.082031 18105.833984 35655.839844
v 8123.286133 18658.109375 35677.710938
v 8693.621094 18085.431641 35646.945312
v 8663.708984 18584.662109 35645.554688
v 8360.608398 19462.287109 33359.644531
v 8251.120117 19814.269531 33441.605469
v 8696.694336 19333.171875 33425.980469
v 8696.694336 19814.269531 33667.761719
v 8154.389648 19265.919922 35618.222656
v 8141.892578 19802.498047 35568.230469
v 8663.708984 19308.154297 35635.136719
v 8633.747070 19755.302734 35624.718750
v 9486.901367 18173.404297 33359.640625
v 9365.172852 18634.503906 33475.605469
v 9823.253906 18003.916016 33550.058594
v 9867.783203 18600.833984 33791.433594
v 10058.625977 18775.013672 34000.324219
v 9286.577148 18044.619141 35528.550781
v 9286.577148 18634.503906 35506.085938
v 9876.459961 18044.619141 35327.371094
v 9876.459961 18634.503906 35279.769531
v 9262.832031 19149.896484 33636.488281
v 9531.242188 19364.884766 33910.542969
v 9126.196289 19814.269531 33818.765625
v 9421.138672 19814.269531 34011.855469
v 9665.371094 18971.628906 33866.199219
v 9867.783203 19190.708984 34079.648438
v 9849.810547 19762.619141 34333.582031
v 9286.577148 19224.386719 35463.976562
v 9286.577148 19814.269531 35437.488281
v 9876.459961 19224.386719 35233.636719
v 10020.294922 19883.919922 34772.375000
v 9900.201172 19803.662109 35176.925781
v 8960.587891 21195.644531 31031.466797
v 7848.796875 20234.732422 33234.652344
v 8881.954102 21636.910156 31230.087891
v 8982.934570 21868.865234 31536.718750
v 8678.863281 22173.802734 31233.076172
v 8909.070312 22173.802734 31650.447266
v 9391.358398 20350.119141 31290.263672
v 9501.189453 20510.724609 31716.400391
v 9102.256836 20997.025391 31230.087891
v 9391.494141 20939.994141 31877.000000
v 9584.519531 20117.468750 31525.017578
v 9633.040039 20350.119141 31877.000000
v 9589.763672 20707.339844 32109.656250
v 9497.315430 21100.593750 32293.275391
v 9815.046875 20404.152344 32412.841797
v 10047.837891 20404.152344 32873.148438
v 9641.349609 20939.994141 32459.078125
v 9978.083984 21020.476562 33036.460938
v 9036.087891 21475.607422 31424.722656
v 9124.933594 21636.910156 31769.193359
v 9056.541016 22173.802734 31945.390625
v 9448.382812 21617.380859 32459.078125
v 9575.169922 21836.316406 32750.330078
v 9295.083008 22173.802734 32412.841797
v 9525.119141 22173.802734 32833.128906
v 9596.004883 21443.060547 32686.531250
v 9754.630859 21617.380859 32969.265625
v 9693.291992 22173.802734 33128.074219
v 8089.721680 20420.943359 33572.050781
v 8330.645508 20607.154297 33925.031250
v 7940.554688 20994.037109 33677.839844
v 8235.497070 20994.037109 33975.839844
v 8696.694336 20194.810547 33834.390625
v 8696.694336 20489.751953 33990.644531
v 8720.045898 21017.388672 34254.125000
v 8031.418945 20404.152344 35516.101562
v 8129.391602 21020.923828 35537.878906
v 8780.510742 20404.152344 35609.835938
v 8932.242188 21229.583984 34536.828125
v 8663.405273 21020.923828 35600.363281
v 7862.193359 21583.919922 33771.582031
v 8157.134766 21583.919922 34092.878906
v 7832.907227 21940.271484 33841.488281
v 8029.534180 22107.742188 34256.878906
v 8507.000000 21583.919922 34387.820312
v 8404.848633 21881.957031 34474.339844
v 8106.810547 21583.919922 35468.738281
v 8060.445312 22289.035156 34811.644531
v 8165.798828 22169.201172 35252.816406
v 8828.272461 21619.763672 34749.023438
v 8744.074219 21619.763672 35376.910156
v 8537.036133 22005.214844 34772.375000
v 8534.713867 22150.363281 35253.523438
v 9024.699219 20118.656250 33883.363281
v 9279.100586 20358.343750 34205.542969
v 9140.246094 20836.328125 34380.789062
v 9635.416016 20204.777344 34423.546875
v 10150.988281 21234.732422 33310.246094
v 9533.501953 20598.033203 34557.675781
v 9286.577148 20404.152344 35417.101562
v 9336.874023 21000.089844 34743.878906
v 9316.754883 20977.949219 35285.605469
v 9726.988281 20402.503906 34761.531250
v 9722.931641 20404.152344 35169.519531
v 9632.188477 20770.597656 34950.925781
v 9632.188477 20770.597656 35121.863281
v 10081.987305 21583.919922 33370.250000
v 9988.233398 22173.802734 33454.246094
v 9140.246094 21447.033203 34930.082031
v 9140.246094 21447.033203 35211.535156
v 10256.248047 17989.037109 31263.656250
v 10491.680664 18044.619141 31822.958984
v 10197.923828 18428.576172 31480.673828
v 10324.410156 18628.923828 31816.041016
v 10697.666992 18049.990234 32445.029297
v 10757.516602 18250.201172 32734.642578
v 10616.433594 18634.503906 32412.841797
v 10740.006836 18634.503906 32864.300781
v 10785.119141 17856.947266 32663.113281
v 10922.278320 18049.990234 32959.851562
v 10837.208008 18634.503906 33159.242188
v 10260.090820 19041.656250 32008.054688
v 10381.236328 19232.724609 32389.554688
v 10654.690430 19174.275391 33052.835938
v 10260.411133 19650.009766 32570.658203
v 10381.422852 19833.689453 32983.308594
v 10776.082031 18944.242188 33282.871094
v 10201.356445 18044.619141 33861.621094
v 10441.428711 18044.619141 34182.492188
v 10180.955078 18381.757812 33883.363281
v 10308.237305 18600.833984 34191.167969
v 11239.592773 18044.619141 33471.808594
v 11134.836914 18602.376953 33637.238281
v 11282.640625 18777.585938 33956.082031
v 10706.416016 18044.619141 34610.503906
v 10351.311523 18044.619141 35441.996094
v 10567.319336 18580.339844 34813.074219
v 10457.257812 18572.316406 35298.953125
v 10826.991211 18044.619141 34905.445312
v 10977.594727 18044.619141 35362.257812
v 10769.326172 18347.603516 35036.832031
v 10826.991211 18393.751953 35362.257812
v 10715.848633 19337.498047 33458.656250
v 10243.469727 19224.386719 34405.363281
v 10667.186523 19801.662109 33630.214844
v 10859.776367 19174.275391 33630.214844
v 11201.215820 19279.763672 34164.621094
v 10782.539062 19596.626953 33851.910156
v 10956.635742 19801.662109 34157.597656
v 10297.987305 19224.386719 34772.375000
v 10225.919922 19224.386719 35100.179688
v 10199.023438 19588.978516 34772.375000
v 10195.992188 19599.962891 35086.542969
v 11345.147461 19513.306641 34483.457031
v 11284.474609 19814.269531 34544.136719
v 11440.708984 18044.619141 33766.750000
v 11766.094727 18067.970703 34184.207031
v 11375.098633 18384.330078 33863.613281
v 11527.628906 18602.376953 34164.621094
v 11994.949219 17886.912109 34381.976562
v 11923.325195 18280.167969 34515.996094
v 11848.738281 18634.503906 34651.503906
v 12106.034180 18067.970703 34736.523438
v 12397.462891 18010.943359 35370.941406
v 11999.421875 18634.503906 34946.441406
v 12180.862305 18634.503906 35362.257812
v 11442.437500 19120.052734 34349.339844
v 11670.316406 19233.341797 34773.839844
v 11898.194336 19346.630859 35150.230469
v 11519.323242 19814.269531 34839.074219
v 11823.506836 19832.142578 35353.019531
v 11944.147461 18953.375000 35064.222656
v 12037.037109 19179.755859 35353.019531
v 12002.365234 19647.427734 35543.488281
v 10298.057617 20404.152344 33168.089844
v 10230.441406 20841.476562 33255.582031
v 10525.079102 20404.152344 33592.609375
v 10693.364258 20404.152344 34039.234375
v 10363.441406 21020.476562 33541.167969
v 10679.686523 21025.957031 34210.753906
v 10882.085938 20404.152344 34334.175781
v 10808.629883 20850.609375 34426.222656
v 10757.516602 21243.865234 34501.710938
v 11204.123047 20454.042969 34763.132812
v 11338.279297 20683.929688 35082.480469
v 10972.676758 21025.957031 34727.953125
v 11284.958008 20994.037109 35165.277344
v 10338.828125 21583.919922 33665.191406
v 10612.491211 21583.919922 34182.492188
v 10302.900391 22173.802734 33749.191406
v 10545.312500 22173.802734 34182.492188
v 10740.006836 21583.919922 34582.230469
v 10708.755859 22173.802734 34697.488281
v 10897.468750 21583.919922 34877.175781
v 11192.410156 21583.919922 35256.113281
v 10820.546875 22173.802734 34992.429688
v 11115.488281 22173.802734 35310.804688
v 11421.603516 20290.673828 34953.597656
v 11554.170898 20454.042969 35312.371094
v 11461.969727 20994.037109 35460.218750
v 11418.000000 21583.919922 35551.058594
v 11386.749023 22173.802734 35605.746094
v 8081.343750 17987.117188 35714.007812
v 8544.614258 17958.365234 35664.769531
v 8499.745117 18707.212891 35664.769531
v 8382.736328 19096.982422 35667.292969
v 8361.909180 19991.275391 35667.292969
v 8499.745117 19202.568359 35664.769531
v 8454.803711 19873.289062 35664.769531
v 8326.360352 20404.152344 35672.339844
v 8341.074219 20842.220703 35667.292969
v 8485.568359 20404.152344 35672.339844
v 8444.583984 20842.220703 35667.292969
v 10515.596680 18044.619141 35952.140625
v 10499.970703 18044.619141 36542.023438
v 10629.497070 18614.041016 35924.863281
v 10515.596680 18634.503906 36542.023438
v 11078.117188 18044.619141 35952.140625
v 11087.622070 18044.619141 36542.023438
v 10917.007812 18614.041016 35924.863281
v 11046.865234 18634.503906 36542.023438
v 10544.191406 18044.619141 37131.906250
v 10674.848633 18044.619141 37479.035156
v 10530.573242 18634.503906 37131.906250
v 10661.229492 18634.503906 37510.289062
v 11012.150391 18044.619141 37131.906250
v 10852.041992 18044.619141 37479.035156
v 11018.270508 18634.503906 37131.906250
v 10867.667969 18634.503906 37510.289062
v 10695.014648 19097.822266 36103.308594
v 10629.497070 19266.423828 36524.984375
v 10695.014648 19583.535156 36710.250000
v 10840.852539 19097.822266 36103.308594
v 10905.536133 19266.423828 36524.984375
v 10821.731445 19583.535156 36710.250000
v 10530.573242 19224.386719 37131.906250
v 10645.604492 19224.386719 37557.164062
v 10646.253906 19640.767578 37131.906250
v 10674.179688 19617.041016 37534.562500
v 10985.648438 19224.386719 37131.906250
v 10865.011719 19224.386719 37557.164062
v 10850.670898 19640.767578 37131.906250
v 10820.019531 19617.041016 37534.562500
v 12480.661133 18185.119141 35760.953125
v 12421.440430 18650.820312 35955.406250
v 12499.779297 18858.326172 36300.039062
v 11914.192383 20040.683594 35725.726562
v 12260.052734 19224.386719 35952.140625
v 12437.361328 19248.314453 36514.812500
v 12066.488281 19832.142578 35934.269531
v 12268.819336 19814.269531 36542.023438
v 12499.779297 19460.894531 36908.074219
v 12462.354492 19807.716797 37115.585938
v 12520.614258 19999.976562 37456.289062
v 11847.037109 20404.152344 35842.062500
v 11784.644531 20956.427734 35999.925781
v 11925.893555 21127.982422 36345.566406
v 11988.629883 20404.152344 36137.003906
v 12143.094727 20404.152344 36542.023438
v 11959.724609 20734.726562 36228.410156
v 12013.332031 20956.427734 36542.125000
v 12343.724609 20404.152344 37131.906250
v 12488.377930 20457.970703 37680.464844
v 12171.861328 20994.037109 37131.906250
v 12380.439453 20994.037109 37721.792969
v 11638.179688 21583.919922 35952.140625
v 11872.925781 21546.316406 36542.125000
v 11539.278320 22173.802734 35952.140625
v 11787.351562 22173.802734 36542.023438
v 11960.697266 21324.621094 36738.820312
v 11927.190430 21717.876953 36892.496094
v 11929.764648 22173.802734 36904.636719
v 12024.291016 21546.316406 37106.238281
v 12363.588867 21532.476562 37771.121094
v 12030.366211 22173.802734 37199.578125
v 12347.740234 22145.345703 37771.121094
v 12522.317383 20690.476562 38025.347656
v 12520.916992 20994.037109 38026.750000
v 12526.194336 21301.554688 38021.472656
v 12499.779297 22323.001953 38177.722656
v 12570.538086 13049.384766 32099.130859
v 12616.140625 13277.830078 32460.568359
v 12830.898438 13325.554688 33002.726562
v 12542.936523 13660.101562 32689.013672
v 12636.641602 13880.211914 33025.449219
v 12580.426758 14301.972656 33237.230469
v 13049.035156 13325.554688 33450.160156
v 12921.703125 13860.691406 33647.355469
v 13007.802734 14011.018555 34182.492188
v 13154.157227 13325.554688 33745.101562
v 13265.606445 13325.554688 34182.492188
v 13122.209961 13627.565430 33880.480469
v 13169.773438 13716.077148 34182.492188
v 13072.909180 14134.124023 34574.523438
v 13408.541016 13325.554688 34772.375000
v 13605.959961 13362.242188 35363.082031
v 13237.670898 13928.672852 34771.644531
v 13441.404297 13915.438477 35362.257812
v 12623.248047 14501.289062 33590.332031
v 12772.923828 14505.321289 34182.492188
v 12541.447266 14902.369141 33785.445312
v 12597.792969 15097.479492 34180.214844
v 12995.078125 14531.048828 34771.644531
v 13086.218750 14744.830078 35122.753906
v 12815.363281 15095.204102 34772.375000
v 13034.616211 15095.204102 35200.386719
v 13163.877930 14351.573242 34967.777344
v 13254.757812 14531.048828 35336.527344
v 13201.024414 15095.204102 35495.328125
v 13776.204102 13190.073242 35560.253906
v 12562.281250 15492.251953 34375.328125
v 12676.791992 15687.362305 34736.589844
v 12984.688477 15685.087891 35265.933594
v 12658.495117 16274.970703 34861.628906
v 12980.202148 16302.254883 35388.964844
v 13182.825195 15685.087891 35560.871094
v 13160.434570 16123.815430 35603.398438
v 12626.038086 16864.853516 34908.503906
v 12866.110352 16864.853516 35362.257812
v 12583.116211 17283.701172 34971.859375
v 12655.845703 17470.091797 35370.941406
v 13694.355469 13583.328125 35675.035156
v 13638.189453 13915.438477 35762.078125
v 13577.625000 14549.022461 35966.355469
v 13701.988281 14774.784180 36255.796875
v 13468.000977 15095.204102 35952.140625
v 13682.735352 15095.204102 36310.808594
v 14009.386719 13365.862305 35933.417969
v 14242.570312 13541.650391 36305.097656
v 13855.002930 13915.438477 36057.019531
v 14149.945312 13915.438477 36416.316406
v 14366.074219 13148.395508 36191.800781
v 14504.429688 13337.235352 36517.843750
v 14438.045898 13915.438477 36711.261719
v 14801.214844 13325.554688 36855.976562
v 14732.987305 13915.438477 36855.976562
v 13764.490234 14381.528320 36172.460938
v 13978.927734 14549.022461 36465.972656
v 14018.876953 15058.432617 36647.097656
v 14536.767578 14599.007812 36814.308594
v 14542.839844 15015.403320 36824.726562
v 14224.328125 15230.543945 36849.640625
v 14654.859375 14498.381836 36846.472656
v 14369.027344 15122.974609 36846.472656
v 13109.632812 16517.072266 35668.386719
v 13434.904297 15685.087891 35952.140625
v 13667.838867 15685.087891 36399.566406
v 13294.174805 16302.254883 35899.863281
v 13602.744141 16274.970703 36483.726562
v 13065.257812 16904.630859 35899.863281
v 13101.375977 17127.775391 36279.101562
v 12851.213867 17454.736328 35952.140625
v 13029.152344 17454.736328 36411.402344
v 13202.078125 16734.521484 36061.640625
v 13425.348633 16868.646484 36553.953125
v 13244.588867 17454.736328 36706.343750
v 13648.618164 17002.771484 36849.640625
v 13539.530273 17454.736328 36850.171875
v 14018.876953 15718.167969 36709.593750
v 13970.416016 16333.958984 36772.023438
v 14584.019531 15718.167969 36788.765625
v 14595.525391 16274.970703 36692.464844
v 14224.328125 15543.593750 36849.640625
v 14379.719727 15543.593750 36849.640625
v 13944.628906 16786.341797 36824.726562
v 14035.588867 17454.736328 36809.101562
v 14595.525391 16864.853516 36687.480469
v 14595.525391 17454.736328 36714.859375
v 13766.650391 16894.556641 36846.472656
v 13740.646484 17454.736328 36850.171875
v 15438.550781 13537.040039 36828.804688
v 15369.666016 13915.438477 36824.726562
v 15640.890625 13537.040039 36828.804688
v 15684.185547 13915.438477 36824.726562
v 15219.318359 13334.468750 36859.781250
v 15074.724609 13915.438477 36855.976562
v 15812.626953 13334.468750 36937.222656
v 15979.126953 13915.438477 36952.781250
v 15180.929688 14558.757812 36809.777344
v 15185.408203 15095.204102 36777.445312
v 15637.308594 14505.321289 36809.101562
v 15658.658203 15095.204102 36789.683594
v 14981.316406 14397.754883 36849.640625
v 15932.250000 14505.321289 36965.355469
v 15953.599609 15095.204102 36934.105469
v 16365.175781 13325.554688 37088.011719
v 16365.175781 13915.438477 37079.226562
v 16955.058594 13325.554688 37022.457031
v 16955.058594 13915.438477 37013.671875
v 17195.117188 15272.761719 36828.804688
v 16365.175781 14505.321289 37084.960938
v 16365.175781 15095.204102 37046.867188
v 16955.058594 14505.321289 36991.207031
v 16981.119141 15083.761719 36934.781250
v 15185.408203 15685.087891 36699.316406
v 15185.408203 16274.970703 36578.101562
v 15800.126953 15719.716797 36748.230469
v 15775.292969 16274.970703 36598.710938
v 16013.312500 15546.172852 36891.308594
v 15185.408203 16864.853516 36546.847656
v 15185.408203 17454.736328 36574.230469
v 15775.292969 16864.853516 36515.597656
v 15775.292969 17454.736328 36499.972656
v 16110.833984 15939.429688 36814.621094
v 16330.546875 16257.472656 36688.761719
v 17216.164062 15652.961914 36831.164062
v 17013.138672 16257.472656 36740.253906
v 16330.546875 15719.716797 36938.769531
v 16504.089844 16049.179688 36877.121094
v 16980.210938 15652.961914 36906.164062
v 16855.232422 16049.179688 36877.121094
v 16365.175781 16864.853516 36501.835938
v 16365.175781 17454.736328 36557.496094
v 16955.058594 16864.853516 36628.703125
v 16955.058594 17454.736328 36698.128906
v 12552.285156 17791.861328 35573.355469
v 12630.779297 18010.943359 35955.406250
v 12915.128906 18003.921875 36595.281250
v 12582.144531 18465.070312 36154.207031
v 12654.174805 18650.820312 36514.812500
v 13408.121094 17964.062500 36901.671875
v 13619.584961 18634.503906 36820.925781
v 13026.200195 18173.417969 36961.441406
v 12927.693359 18630.470703 37147.605469
v 13038.008789 18824.408203 37511.050781
v 13309.713867 18630.470703 37147.605469
v 13163.877930 18824.408203 37511.050781
v 12583.116211 19067.638672 36693.292969
v 13595.102539 19224.386719 36805.300781
v 13593.094727 19814.269531 36777.847656
v 12649.342773 19248.314453 37115.585938
v 12897.795898 19204.505859 37713.324219
v 12562.281250 19606.720703 37301.332031
v 12640.709961 19807.716797 37680.464844
v 13380.368164 19224.386719 37131.906250
v 13210.820312 19204.505859 37713.324219
v 13393.977539 19814.269531 37131.906250
v 13281.231445 19814.269531 37721.792969
v 13949.614258 17988.650391 36797.277344
v 14005.642578 18634.503906 36761.808594
v 14595.525391 18044.619141 36699.234375
v 14595.525391 18634.503906 36671.855469
v 13715.633789 17754.707031 36841.898438
v 14005.642578 19224.386719 36730.558594
v 14005.642578 19814.269531 36686.507812
v 14595.525391 19224.386719 36640.601562
v 14595.525391 19814.269531 36608.382812
v 12997.205078 19387.878906 38136.156250
v 12939.584961 19814.269531 38148.992188
v 13163.877930 19387.878906 38136.156250
v 13185.408203 19814.269531 38148.992188
v 13577.469727 20404.152344 36746.597656
v 13526.970703 20994.037109 36730.972656
v 12609.530273 20297.222656 37849.542969
v 13378.351562 20404.152344 37131.906250
v 13281.231445 20404.152344 37721.792969
v 13312.236328 20994.037109 37131.906250
v 13265.615234 20994.037109 37721.792969
v 13462.065430 21583.919922 36730.972656
v 13471.807617 22173.802734 36715.347656
v 12541.447266 21694.810547 38000.640625
v 12541.447266 21929.746094 38000.640625
v 13214.404297 21583.919922 37131.906250
v 13232.688477 21583.919922 37721.792969
v 13224.147461 22173.802734 37131.906250
v 13232.688477 22173.802734 37721.792969
v 14005.642578 20404.152344 36624.007812
v 14005.642578 20994.037109 36581.074219
v 14595.525391 20404.152344 36561.503906
v 14595.525391 20994.037109 36502.945312
v 14005.642578 21583.919922 36565.449219
v 14005.642578 22173.802734 36499.980469
v 14595.525391 21583.919922 36471.695312
v 14595.525391 22173.802734 36390.613281
v 12814.045898 20457.970703 38102.710938
v 12835.698242 21004.052734 38307.355469
v 13038.873047 21207.357422 38646.570312
v 13185.408203 20404.152344 38117.742188
v 13185.825195 21004.052734 38299.339844
v 13143.043945 21207.357422 38646.570312
v 12637.361328 21532.476562 38255.531250
v 12937.617188 21593.927734 38866.539062
v 12583.686523 22145.345703 38349.281250
v 12742.073242 22173.802734 38901.558594
v 13234.373047 21583.919922 38311.675781
v 13172.302734 21593.927734 38866.539062
v 13249.999023 22173.802734 38311.675781
v 13230.844727 22173.802734 38901.558594
v 13041.874023 21797.228516 39217.019531
v 12978.958984 22173.802734 39256.507812
v 13141.339844 21797.228516 39217.019531
v 13166.253906 22173.802734 39256.507812
v 15185.408203 18044.619141 36579.136719
v 15185.408203 18634.503906 36572.285156
v 15775.292969 18044.619141 36504.878906
v 15775.292969 18634.503906 36511.718750
v 15185.408203 19224.386719 36551.753906
v 15185.408203 19814.269531 36531.222656
v 15807.730469 19190.457031 36640.242188
v 15677.667969 19814.269531 36668.468750
v 16025.984375 19364.462891 36912.140625
v 15972.609375 19814.269531 36965.355469
v 16366.615234 18040.587891 36679.300781
v 16159.458984 18634.503906 36670.406250
v 16977.062500 18040.587891 36791.804688
v 17197.650391 18634.503906 36824.726562
v 16564.203125 18234.527344 36870.476562
v 16454.400391 18634.503906 36902.851562
v 16795.107422 18234.527344 36870.476562
v 16902.708984 18634.503906 36902.851562
v 16088.488281 18971.208984 36727.214844
v 17222.132812 19224.386719 36824.726562
v 17206.507812 19814.269531 36824.726562
v 16317.140625 19190.457031 36947.281250
v 16365.175781 19814.269531 37046.867188
v 16927.191406 19224.386719 36918.480469
v 16911.566406 19814.269531 36918.480469
v 15185.408203 20404.152344 36499.972656
v 15185.408203 20994.037109 36437.480469
v 15646.417969 20404.152344 36652.843750
v 15646.417969 20994.037109 36621.601562
v 15941.359375 20404.152344 36980.980469
v 15941.359375 20994.037109 36980.980469
v 15185.408203 21583.919922 36406.238281
v 15185.408203 22173.802734 36359.371094
v 15646.417969 21583.919922 36605.984375
v 15668.164062 22173.802734 36590.359375
v 15941.359375 21583.919922 36965.355469
v 15963.105469 22173.802734 36934.105469
v 17222.132812 20404.152344 36824.726562
v 17118.630859 20994.037109 36824.726562
v 16365.175781 20404.152344 37062.492188
v 16365.175781 20994.037109 37038.082031
v 16927.191406 20404.152344 36918.480469
v 16823.689453 20994.037109 36894.066406
v 16940.203125 21555.208984 36827.171875
v 17129.351562 22173.802734 36824.726562
v 16424.164062 21555.208984 36966.609375
v 16365.175781 22173.802734 36983.394531
v 16704.250000 21555.208984 36863.898438
v 16834.410156 22173.802734 36886.253906
v 3079.044434 22479.152344 10278.463867
v 3002.812500 22554.437500 10587.165039
v 2491.525391 22479.933594 12029.847656
v 2888.366211 22671.394531 11177.047852
v 2757.037598 22687.578125 11806.705078
v 5395.594727 22763.689453 6089.702148
v 5358.241211 23353.572266 6011.574219
v 4790.589844 22763.689453 7170.804688
v 4759.338867 23353.572266 7100.494141
v 5169.419922 22763.689453 6457.982910
v 4931.220215 22763.689453 6875.863281
v 5085.189453 23353.572266 6457.982910
v 4884.343262 23353.572266 6805.552734
v 5372.899902 23943.455078 6039.926758
v 5413.868164 24301.572266 6120.701172
v 4764.487305 23943.455078 7127.884277
v 4810.992188 24331.513672 7228.844238
v 5114.736328 23943.455078 6457.982910
v 4899.230957 23943.455078 6832.942383
v 5312.796387 24512.253906 6479.073730
v 5012.615723 24530.220703 7038.476562
v 5410.005859 24891.455078 6689.761719
v 5326.725586 25102.138672 7081.450195
v 5430.830566 25450.386719 7300.467285
v 5929.829590 22763.691406 5494.769531
v 5634.888184 22763.691406 5794.760254
v 5881.031250 23353.574219 5494.769531
v 5586.089844 23353.574219 5716.632812
v 6337.161133 22763.691406 5300.151367
v 6337.161133 23353.574219 5333.185059
v 5956.260742 23943.457031 5538.747559
v 5661.319336 23943.457031 5744.985352
v 6041.559570 24239.058594 5572.498047
v 5803.263672 24466.943359 5913.662109
v 6337.161133 23943.457031 5439.666016
v 6337.161133 24339.984375 5538.747559
v 6337.161133 24634.925781 5701.834961
v 5564.967773 24694.826172 6296.506836
v 6927.043945 22763.691406 5123.203125
v 6927.043945 23353.574219 5187.487305
v 7516.927734 22763.691406 5046.857422
v 7516.927734 23353.574219 5124.985352
v 6927.043945 23943.457031 5328.117188
v 6927.043945 24485.671875 5489.701660
v 6927.043945 24780.613281 5603.023438
v 7516.927734 23943.457031 5278.342773
v 7464.571289 24591.300781 5489.442383
v 7233.039062 24826.566406 5574.874023
v 5958.223145 24912.277344 6099.878906
v 6370.745117 25114.630859 6017.125977
v 6589.762695 25458.117188 6141.535156
v 5761.589355 25098.494141 6482.717285
v 5564.955566 25284.708984 6907.211914
v 5958.211426 25522.996094 6668.928223
v 5777.059082 25683.318359 7083.011719
v 6196.506836 25305.533203 6275.672852
v 6372.300781 25687.183594 6482.717773
v 6154.838867 25916.250000 6865.556152
v 5989.162109 26061.105469 7258.811523
v 6548.094727 26089.677734 6689.762207
v 6372.307129 26272.019531 7083.018066
v 6589.774414 26630.154297 7300.479980
v 6927.043945 25123.224609 5809.818848
v 6927.043945 25556.220703 6074.895996
v 7626.294922 24868.236328 5569.605469
v 7464.571289 25088.207031 5669.914062
v 7520.038086 25740.589844 6004.438477
v 6927.043945 25851.162109 6286.894043
v 7325.484375 25955.542969 6194.712891
v 7718.739258 26038.876953 6132.414551
v 6960.635742 26292.980469 6603.157227
v 6786.402344 26482.935547 6907.224121
v 7179.657227 26619.423828 6731.430664
v 6998.500000 26821.416016 7114.269043
v 7520.038086 26262.498047 6349.230957
v 7516.927734 26715.302734 6666.966309
v 7516.927734 27010.244141 6915.021973
v 3627.247559 22524.181641 9626.078125
v 4167.529297 22763.689453 8911.156250
v 3898.067871 22737.960938 9420.629883
v 4230.031738 23353.572266 8934.589844
v 4109.365723 23353.572266 9407.398438
v 4230.031738 23943.455078 8901.404297
v 4140.616699 23943.455078 9407.398438
v 4244.210938 24416.447266 8959.406250
v 4209.023926 24581.181641 9362.062500
v 4624.973633 22763.689453 7637.749023
v 4437.475586 22763.689453 8227.632812
v 4578.096680 23353.572266 7637.749023
v 4421.850098 23353.572266 8227.632812
v 4308.150879 22763.689453 8616.214844
v 4308.150879 23353.572266 8639.648438
v 4567.619629 23943.455078 7637.749023
v 4390.607910 23943.455078 8227.632812
v 4728.203125 24530.220703 7640.864258
v 4503.434082 24533.339844 8227.632812
v 4913.566406 24724.769531 7446.312988
v 4292.534180 23943.455078 8606.462891
v 4332.667480 24581.181641 8784.672852
v 4285.879395 24809.703125 9135.210938
v 3451.456543 22698.294922 10081.833984
v 3299.536621 22849.378906 10587.165039
v 3668.921875 23072.396484 10278.458984
v 3594.478027 23146.849609 10587.165039
v 3788.453613 22917.435547 9885.203125
v 3885.567383 23302.843750 10048.011719
v 3823.929199 23441.791016 10587.165039
v 3185.099121 22966.335938 11177.047852
v 3122.596680 23028.837891 11766.931641
v 3480.040527 23276.912109 11177.047852
v 3459.024902 23406.894531 11719.211914
v 3758.690430 23571.853516 11177.047852
v 3701.468750 23639.070312 11490.771484
v 4062.488770 23943.455078 9997.281250
v 3998.204590 23943.455078 10587.165039
v 4124.991211 24533.339844 9997.281250
v 4078.114746 24533.339844 10587.165039
v 3663.449219 23680.738281 11884.027344
v 3898.816406 23943.455078 11177.047852
v 3793.556641 23903.802734 11719.211914
v 4028.339355 24533.339844 11177.047852
v 4012.713867 24533.339844 11766.931641
v 4244.210938 24918.830078 9528.466797
v 4810.992188 24900.576172 7839.567871
v 4751.850098 25107.609375 8280.745117
v 4852.660156 25427.955078 8512.781250
v 5047.792480 25107.609375 7640.864258
v 4945.117676 25293.832031 8119.525391
v 5350.734375 25559.054688 7637.749512
v 5173.002441 25697.501953 8264.068359
v 4550.311035 25123.222656 8817.515625
v 4364.674805 25118.564453 9362.062500
v 4780.112793 25520.951172 8817.515625
v 4689.736816 25730.472656 9430.037109
v 5010.869141 25815.894531 8817.515625
v 4915.162598 25938.679688 9248.502930
v 5400.887207 26059.507812 8408.611328
v 4827.649414 26042.851562 9641.757812
v 5305.810547 26154.591797 8817.515625
v 5163.874023 26294.041016 9424.296875
v 5412.584473 26653.566406 9600.089844
v 4214.406250 25033.447266 9997.281250
v 4203.730957 25174.037109 10548.849609
v 4256.224609 25494.625000 10719.934570
v 4149.626953 25123.222656 11177.047852
v 4156.242188 25123.222656 11766.931641
v 4239.041504 25532.853516 11177.047852
v 4245.657227 25548.478516 11766.931641
v 4315.225586 25328.388672 9997.281250
v 4285.879395 25404.542969 10326.679688
v 4516.152344 25713.105469 9997.281250
v 4377.369141 25699.994141 10548.849609
v 4355.252441 25827.794922 11177.047852
v 4339.392578 25843.419922 11766.931641
v 4768.438965 26117.687500 9997.281250
v 4720.411621 26310.830078 10641.826172
v 4857.617188 26602.765625 10874.894531
v 5038.985352 26412.628906 9997.281250
v 4940.953125 26512.685547 10481.638672
v 5333.926758 26712.638672 9997.281250
v 5145.506348 26769.025391 10641.826172
v 4611.687988 26302.988281 11177.047852
v 4540.085938 26302.988281 11766.931641
v 4823.947266 26652.062500 11177.047852
v 4768.204590 26761.287109 11766.931641
v 5163.479492 26986.998047 11126.226562
v 4978.258789 27056.228516 11766.932617
v 5590.761230 25853.996094 7637.749512
v 5493.332520 25967.050781 8015.355469
v 5885.703125 26164.558594 7637.749512
v 5745.813477 26308.218750 8211.988281
v 5998.295410 26641.855469 8408.623047
v 6188.700195 26459.500000 7637.749512
v 6083.227539 26556.925781 8015.367188
v 6483.642090 26723.195312 7637.749512
v 6302.777832 26816.515625 8218.250000
v 5606.395996 26449.533203 8817.515625
v 5505.045898 26545.232422 9206.833984
v 5901.337402 26754.437500 8817.515625
v 5745.813477 26904.753906 9382.628906
v 6297.297852 27070.441406 8765.153320
v 6074.094727 27155.939453 9165.166992
v 6831.833008 27018.136719 7637.749512
v 6701.184570 27133.160156 8227.633789
v 6643.144531 27176.771484 8533.616211
v 5622.012207 27007.580078 9997.282227
v 5526.477051 27103.115234 10587.166016
v 5465.945801 27174.205078 10895.716797
v 7210.596680 27199.201172 7321.313965
v 7516.927734 27305.644531 7209.963867
v 5364.163574 27287.486328 11288.972656
v 5273.200684 27391.199219 11766.932617
v 5986.582031 27243.451172 9558.422852
v 6467.350098 27331.730469 8926.871094
v 6333.218750 27484.220703 9382.629883
v 6592.342773 27817.455078 9600.090820
v 7126.774414 27267.394531 7637.749512
v 6996.125977 27382.408203 8227.633789
v 7519.080078 27574.863281 7628.244629
v 7327.967773 27677.349609 8227.633789
v 7717.143555 27830.957031 7818.535645
v 7622.909180 27894.330078 8227.633789
v 6871.022461 27538.769531 8761.495117
v 6705.646484 27724.988281 9206.834961
v 7098.901367 27851.792969 8989.374023
v 6912.182617 27937.839844 9405.038086
v 7261.392578 27745.808594 8596.118164
v 7481.583008 27977.962891 8802.654297
v 7509.079102 28244.398438 9399.557617
v 7700.473633 28411.708984 9590.958008
v 5916.954102 27328.695312 9997.282227
v 5850.176270 27503.089844 10604.325195
v 6016.548828 27803.367188 10812.393555
v 6208.187012 27623.636719 9997.282227
v 6106.642090 27713.275391 10419.137695
v 6503.128906 27896.121094 9997.282227
v 6366.947754 28046.230469 10647.010742
v 5615.648926 27483.570312 11126.226562
v 5536.891113 27686.142578 11766.932617
v 5941.211426 27878.705078 11177.048828
v 5831.832520 27988.083984 11766.932617
v 6274.388672 28173.646484 11177.048828
v 6149.393555 28283.025391 11766.932617
v 6627.253906 28370.052734 10874.882812
v 6569.330078 28412.935547 11177.048828
v 6444.334961 28492.835938 11766.932617
v 6931.703125 28200.220703 9989.441406
v 6738.181641 28289.091797 10481.627930
v 7307.218750 28324.003906 9787.585938
v 7131.436523 28416.447266 10180.840820
v 6931.703125 28474.863281 10641.819336
v 7509.079102 28487.357422 9989.441406
v 7516.927734 28722.279297 10587.166016
v 6927.043945 28635.382812 11177.048828
v 6983.130859 28805.216797 11810.640625
v 7217.149414 28962.298828 12036.407227
v 7498.133789 28895.470703 11170.632812
v 7288.976562 28929.966797 11643.152344
v 7682.232422 28992.470703 11362.983398
v 7498.133789 29014.875000 11810.640625
v 2485.827637 22485.679688 12356.814453
v 2491.525391 22480.136719 12695.890625
v 2797.862305 22759.755859 12356.814453
v 2780.368164 22657.341797 12914.189453
v 2966.187988 22608.892578 13536.581055
v 3051.453613 22530.925781 13991.528320
v 3063.148926 23008.140625 21479.169922
v 2984.855957 23353.570312 21421.876953
v 2890.139160 23943.453125 21351.794922
v 2890.139160 24533.337891 21344.216797
v 2952.641602 25123.220703 21359.841797
v 2983.892578 25713.103516 21375.466797
v 2999.518555 26302.986328 21406.718750
v 3046.476074 26892.869141 21453.675781
v 3082.806641 27197.808594 21490.007812
v 3113.667969 23037.767578 12356.814453
v 3160.544434 22990.890625 12946.698242
v 3379.752441 23353.572266 12356.814453
v 3489.383301 23396.064453 12964.188477
v 3689.347656 23621.019531 13172.476562
v 3217.312988 22903.833984 13536.581055
v 3248.660156 22742.007812 14163.479492
v 3512.254883 23279.000000 13536.581055
v 3570.724609 23198.792969 14126.463867
v 3741.642578 23573.941406 13536.581055
v 3837.484375 23493.734375 14126.463867
v 3653.830078 23696.849609 12356.814453
v 3663.449219 23680.738281 12779.221680
v 3831.741699 23991.791016 12356.814453
v 3828.609375 23903.802734 12964.188477
v 4068.519531 24533.339844 12356.814453
v 4129.986816 24533.339844 12946.698242
v 4039.446777 23980.466797 13561.092773
v 4132.425781 23815.148438 14126.463867
v 4213.371094 24533.339844 13349.793945
v 4323.670898 24201.771484 13774.060547
v 4539.184082 24100.568359 14103.487305
v 4403.758301 24533.339844 13644.736328
v 4698.699707 24533.339844 13946.770508
v 5136.927246 24087.939453 14318.948242
v 5066.693359 24533.339844 14241.711914
v 3472.112305 22807.728516 14735.386719
v 3560.085449 22641.345703 15306.230469
v 3635.965820 23120.820312 14551.451172
v 3703.833008 23033.716797 14944.706055
v 3786.581055 22936.287109 15306.230469
v 3957.112793 23374.087891 14748.072266
v 4081.522461 23253.699219 15306.230469
v 3642.614746 22527.162109 15680.421875
v 3975.859375 22765.457031 15897.880859
v 4151.651855 22610.494141 16301.558594
v 4193.321777 23143.250000 15722.084961
v 4210.391602 23710.693359 14551.438477
v 4297.489746 23627.355469 14944.694336
v 4410.545410 23548.640625 15306.230469
v 4327.439453 23003.750000 16115.339844
v 4544.904297 22807.121094 16513.806641
v 4576.156250 23368.445312 15887.460938
v 4720.695312 23200.378906 16332.801758
v 4917.334473 23003.750000 16726.056641
v 4917.334473 23593.636719 16052.837891
v 5043.313965 23379.634766 16512.056641
v 4523.475098 23813.908203 14735.378906
v 4705.487305 23717.691406 15306.230469
v 5242.063477 24016.951172 14621.261719
v 5157.395020 23830.921875 15306.230469
v 5361.634766 24533.339844 14484.808594
v 4824.872559 23665.259766 15659.582031
v 5131.335449 23760.935547 15872.170898
v 5342.309570 23772.457031 16485.996094
v 4221.524414 25160.234375 12393.833008
v 4247.520508 24952.060547 12946.698242
v 4265.045410 25515.457031 12221.885742
v 4267.529785 24833.320312 13246.679688
v 4285.879395 25381.537109 12615.140625
v 4323.776367 25247.001953 12946.698242
v 4321.513672 25712.494141 12393.833008
v 4421.777832 25713.105469 12946.698242
v 4462.820312 25067.259766 13480.617188
v 4764.100586 25123.222656 13971.990234
v 4624.901367 25713.105469 13536.581055
v 4806.215820 25713.105469 13925.114258
v 5005.324707 25123.222656 14266.932617
v 5005.324707 25713.105469 14220.055664
v 4499.905762 26302.988281 12356.814453
v 4569.113770 26302.988281 12946.698242
v 4743.650391 26823.789062 12356.814453
v 4766.053711 26792.691406 12946.698242
v 4931.301270 27118.732422 12356.815430
v 4931.301270 27087.632812 12946.699219
v 4762.831055 26311.076172 13557.160156
v 4845.795410 26119.837891 13862.666016
v 4813.164062 26706.937500 13374.252930
v 4884.799805 26513.093750 13767.507812
v 5019.032715 26311.076172 14086.161133
v 4972.314941 26899.287109 13557.160156
v 5262.078613 26907.986328 14154.079102
v 5300.266113 25123.222656 14581.451172
v 5300.266113 25713.105469 14624.375977
v 5336.359863 26302.988281 14577.499023
v 5391.346191 26721.433594 14494.217773
v 5950.851562 23647.695312 14720.371094
v 6041.127441 23647.423828 15029.447266
v 6270.052246 23647.695312 14724.394531
v 6149.368652 23647.423828 15029.447266
v 5775.329102 23859.482422 14598.754883
v 5805.611328 23800.576172 15258.136719
v 5771.918945 24570.480469 14748.792969
v 5984.973633 24791.869141 15047.701172
v 6340.947754 23877.759766 14670.560547
v 6349.915527 23947.605469 15274.493164
v 6337.161133 24424.996094 14849.380859
v 6829.678711 24508.328125 15307.860352
v 5769.787598 24048.316406 15906.123047
v 5612.993652 24067.398438 16485.996094
v 5981.421387 24299.197266 16109.422852
v 5907.935059 24422.447266 16485.996094
v 6157.208008 24144.232422 15716.167969
v 6353.839355 24506.240234 15924.400391
v 6137.485352 24717.388672 16485.996094
v 6868.055664 24043.503906 14792.005859
v 6927.043945 24142.250000 15123.062500
v 6927.043945 24354.607422 14880.631836
v 7516.927734 24153.267578 14893.359375
v 7516.927734 24153.267578 15096.491211
v 7516.927734 24325.300781 14893.359375
v 7516.927734 24325.300781 15096.491211
v 6699.857422 24713.283203 15739.377930
v 5504.625488 27114.689453 14369.117188
v 5587.232910 25123.222656 14876.392578
v 5893.236816 25147.867188 15269.089844
v 5513.056641 25713.105469 14919.317383
v 5740.005371 25713.105469 15306.230469
v 6337.161133 24960.121094 15445.825195
v 6007.308105 25360.925781 15720.908203
v 5974.226562 25713.105469 15785.609375
v 6321.151367 25112.800781 15926.770508
v 6257.881348 25123.222656 16485.996094
v 6103.029785 25713.105469 16080.550781
v 6316.279297 25713.105469 16485.996094
v 5553.173340 26302.988281 14872.441406
v 5805.420410 26302.988281 15306.230469
v 5637.121582 26907.986328 14701.045898
v 5958.969238 26840.000000 15290.863281
v 6124.483398 27001.380859 15477.249023
v 5999.524902 26302.988281 15696.692383
v 6041.038574 26608.123047 15602.351562
v 6158.763184 26302.988281 15991.633789
v 6434.515137 26302.988281 16485.996094
v 6341.941406 26867.257812 15865.992188
v 6575.792969 26707.876953 16485.996094
v 6699.857422 24864.679688 15554.259766
v 6699.857422 24864.679688 15739.377930
v 6672.690430 27126.390625 16129.633789
v 6770.140625 27002.818359 16485.996094
v 4762.369629 22610.494141 16895.621094
v 5145.210449 22762.980469 17061.640625
v 5378.427246 22547.546875 17629.332031
v 5342.309570 23353.572266 16848.265625
v 5331.049316 22751.417969 18264.042969
v 5267.618652 22763.687500 18845.529297
v 5351.223633 23353.570312 18412.199219
v 5285.166016 23353.570312 18845.529297
v 5447.379883 23718.638672 16817.242188
v 5348.251465 23943.453125 18396.574219
v 5203.103027 23943.453125 18845.529297
v 5338.512695 24533.337891 18377.230469
v 5134.813477 24533.337891 18845.529297
v 4202.542969 22862.308594 20228.080078
v 4149.968750 23353.570312 20186.681641
v 3672.569824 23028.962891 20900.003906
v 3424.507812 22821.923828 21241.671875
v 3630.373535 23353.570312 20848.068359
v 3335.432129 23353.570312 21126.933594
v 3974.664551 22749.007812 20610.273438
v 3746.785156 22635.707031 21004.173828
v 3855.027344 23353.570312 20553.126953
v 4160.760742 23943.453125 20238.240234
v 4233.124512 24503.214844 20304.640625
v 3567.876465 23943.453125 20801.191406
v 3272.935059 23943.453125 21056.853516
v 3577.714355 24533.337891 20850.822266
v 3282.772949 24533.337891 21049.275391
v 3865.819336 23943.453125 20506.250000
v 3997.170898 24503.214844 20508.751953
v 4846.314453 22763.687500 19714.214844
v 4495.795898 22704.882812 20028.990234
v 4851.051758 23153.365234 19718.953125
v 4619.659668 23351.423828 19870.603516
v 5211.670410 22763.687500 19367.802734
v 5174.724609 23302.625000 19440.027344
v 4985.189453 23546.623047 19748.919922
v 4272.875977 22469.052734 20320.542969
v 4567.511719 23943.453125 20012.136719
v 4508.522949 24503.214844 20131.548828
v 5143.587402 23943.453125 19435.412109
v 4993.794434 23943.453125 19799.193359
v 5011.742188 24533.337891 19435.412109
v 4920.500000 24533.337891 19808.931641
v 5352.276855 25123.220703 18403.648438
v 5152.600586 25123.220703 18845.529297
v 5403.241699 25592.259766 18480.656250
v 5320.996582 25758.574219 18800.056641
v 5403.251465 26093.650391 18966.371094
v 4262.464844 24999.789062 20317.658203
v 3611.205078 25068.099609 20875.181641
v 3375.251953 25068.099609 21033.943359
v 3589.383301 25713.103516 20848.068359
v 3294.441895 25713.103516 21080.525391
v 3972.576172 25113.884766 20591.429688
v 3977.628418 25713.103516 20584.845703
v 3636.260254 26302.986328 20879.320312
v 3341.318848 26302.986328 21111.777344
v 3672.569824 26658.726562 20900.003906
v 3440.663086 26870.361328 21127.943359
v 3977.628418 26302.986328 20647.347656
v 3950.071289 26870.361328 20755.968750
v 3735.072266 27051.980469 20941.671875
v 4514.960938 25167.138672 20108.097656
v 4599.223145 25713.103516 20072.623047
v 4979.608887 25123.220703 19435.412109
v 4884.343262 25123.220703 19762.054688
v 5072.462402 25713.103516 19435.412109
v 4904.874512 25713.103516 19777.681641
v 4283.299316 25393.042969 20330.966797
v 4304.281250 25713.103516 20351.957031
v 4646.090820 26302.986328 20131.992188
v 4724.217285 26892.869141 20206.988281
v 5281.888184 26295.361328 19427.449219
v 4981.147949 26302.986328 19837.050781
v 5364.928711 26892.869141 19616.601562
v 5069.987305 26892.869141 19912.046875
v 4351.148926 26302.986328 20383.207031
v 4429.275879 26892.869141 20430.076172
v 5509.881836 22915.468750 17227.660156
v 5533.121094 22783.498047 17629.332031
v 5568.862305 23353.572266 17143.207031
v 5747.971191 23353.572266 17665.763672
v 5529.432129 22939.865234 18073.011719
v 5631.445312 23353.570312 18117.257812
v 5630.086426 23926.541016 17038.673828
v 5821.256348 23943.455078 17665.763672
v 5904.376465 24585.113281 17042.914062
v 5791.049316 24533.339844 17665.763672
v 6054.244629 24816.255859 16824.310547
v 5657.854004 23943.453125 18101.632812
v 5579.726074 24533.337891 18082.289062
v 6007.308105 24919.035156 17217.566406
v 5887.231445 25118.685547 17670.292969
v 5978.241211 25713.105469 17891.892578
v 6154.507324 25118.685547 17042.914062
v 6106.425781 25312.289062 17476.683594
v 6433.687012 25713.105469 17075.878906
v 6220.437500 25713.105469 17596.951172
v 5579.726074 25123.220703 18108.707031
v 5649.011230 25758.574219 18272.675781
v 5472.176758 25985.515625 18573.113281
v 6041.235840 26048.011719 17959.720703
v 6602.824219 26268.814453 17030.033203
v 6362.226074 26245.335938 17681.105469
v 6629.726562 26609.318359 16802.839844
v 6532.048828 26892.871094 17813.855469
v 5889.608887 26267.978516 18240.662109
v 5574.792969 26295.361328 18800.056641
v 5965.640137 26762.894531 18427.298828
v 5855.339355 26932.861328 18805.472656
v 6115.559082 26441.265625 18034.042969
v 6204.626465 26932.861328 18240.662109
v 6053.047363 27156.148438 18582.140625
v 6650.560547 26442.658203 17196.095703
v 6650.560547 26442.658203 17402.492188
v 6827.897461 26840.716797 17030.033203
v 6769.250000 26892.871094 17518.914062
v 5516.542480 26486.904297 19225.511719
v 5571.112305 26892.869141 19321.660156
v 5226.242676 27460.703125 12356.815430
v 5271.461426 27536.603516 12897.424805
v 5277.961914 27424.689453 13536.582031
v 5370.512207 27311.306641 13975.862305
v 5474.388672 27755.644531 12356.815430
v 5457.477539 27772.554688 12897.424805
v 5821.121582 28116.556641 12413.017578
v 5680.714844 28013.650391 12897.424805
v 6067.338379 28342.460938 12253.857422
v 5505.639648 27719.630859 13536.582031
v 5620.812012 27497.863281 14154.080078
v 5838.979004 28104.056641 13501.694336
v 5918.655273 27929.605469 14126.464844
v 6088.171875 28321.628906 13675.064453
v 6169.618164 28224.546875 14126.464844
v 6037.575195 28370.052734 12647.112305
v 6026.324219 28381.845703 12946.699219
v 6293.244141 28523.445312 12413.017578
v 6337.161133 28604.294922 12946.699219
v 6025.669922 28384.130859 13281.807617
v 6305.744629 28542.966797 13501.694336
v 6464.560059 28513.681641 14126.464844
v 6857.287109 28855.500000 12356.815430
v 6794.785156 28884.970703 12946.699219
v 7152.228516 28987.345703 12356.815430
v 7089.726562 29018.597656 12946.699219
v 7516.927734 29086.734375 12356.815430
v 7516.927734 29149.236328 12946.699219
v 6815.171875 28869.343750 13536.582031
v 6877.674805 28808.625000 14126.464844
v 7110.113281 29018.597656 13536.582031
v 7172.616211 28987.345703 14126.464844
v 7601.751953 29281.939453 13613.509766
v 7463.071289 29263.328125 14067.476562
v 5913.722656 27467.388672 14700.974609
v 6007.308105 27260.515625 15083.993164
v 6007.308105 27829.566406 14494.097656
v 5988.946289 28314.306641 15511.704102
v 6082.819824 27653.771484 14887.353516
v 6300.279297 27498.810547 15325.721680
v 6241.232910 28044.771484 14700.974609
v 6342.735352 28135.132812 15342.949219
v 5988.946289 28314.306641 15724.881836
v 6517.738770 27343.845703 15736.378906
v 6337.161133 28313.853516 15774.395508
v 5897.953125 28662.521484 15446.276367
v 5835.769043 29252.404297 15415.025391
v 6529.615234 28643.937500 14721.647461
v 6263.587891 28662.521484 15151.334961
v 6529.132324 29252.404297 14925.727539
v 6234.190918 29252.404297 15120.083984
v 5830.856934 28617.517578 15911.350586
v 5864.847656 28728.722656 16485.996094
v 5564.159180 29249.662109 15955.103516
v 5615.591309 29249.662109 16427.007812
v 6337.161133 28418.156250 16069.336914
v 6337.161133 28517.382812 16485.996094
v 6672.698242 27737.099609 15567.450195
v 6867.438477 28137.505859 15557.032227
v 7304.238281 28319.046875 15546.615234
v 6869.322266 27550.890625 15953.833984
v 7065.082031 27375.878906 16485.996094
v 7241.751953 27757.931641 16171.290039
v 7383.480469 27670.820312 16485.996094
v 7469.623047 28105.660156 15933.000000
v 7678.421875 27864.429688 16485.996094
v 6823.893555 28828.173828 14528.553711
v 7062.177734 28485.707031 15546.615234
v 6983.130859 29196.318359 14604.628906
v 7431.145508 28510.699219 15560.254883
v 7257.518555 29355.554688 14447.605469
v 6890.148438 28553.912109 15901.479492
v 6927.043945 28690.136719 16485.996094
v 7552.101562 28681.457031 15878.554688
v 7330.943359 28901.476562 16485.996094
v 7713.375000 28993.658203 16154.860352
v 7625.884766 29018.750000 16485.996094
v 7787.026367 29842.287109 13794.835938
v 7603.856445 29842.287109 14126.464844
v 7805.724609 30160.126953 13825.378906
v 7744.911133 30276.185547 14126.464844
v 5906.034180 29725.197266 15470.035156
v 6563.455566 29683.537109 14986.687500
v 6308.256348 29900.994141 15250.047852
v 6446.312500 30320.642578 15423.315430
v 5843.035645 29890.009766 15860.888672
v 5803.155762 29842.287109 16485.996094
v 6011.388672 30188.894531 16034.032227
v 6011.598633 30183.476562 16485.998047
v 6053.056641 30118.453125 15640.777344
v 6306.330078 30451.396484 15826.987305
v 6234.127930 30478.417969 16485.998047
v 6559.603516 30779.966797 16013.198242
v 6529.069336 30821.126953 16485.998047
v 6891.818359 29865.013672 14854.508789
v 6671.707031 30076.791016 15030.060547
v 7064.961914 30252.574219 14945.019531
v 6857.919922 30483.234375 15247.527344
v 7333.756836 29842.287109 14538.823242
v 7526.414062 30472.718750 14744.683594
v 7324.091797 30645.828125 15071.740234
v 6650.876953 30713.898438 15619.943359
v 7044.132812 30842.460938 15464.995117
v 7717.347656 30797.236328 14937.602539
v 7551.967773 31016.476562 15330.762695
v 7779.841797 31328.390625 15589.783203
v 6879.320312 30945.109375 15848.388672
v 6973.841797 31155.353516 16445.298828
v 7201.667969 31336.330078 16614.794922
v 7353.564453 31254.912109 15896.114258
v 7232.823242 31315.494141 16221.539062
v 7648.505859 31402.382812 15896.114258
v 7464.441406 31451.662109 16445.298828
v 3372.695801 27429.761719 21333.416016
v 3573.856934 28072.636719 21406.791016
v 4110.013672 27482.753906 20793.154297
v 3815.072266 27482.753906 21004.324219
v 4203.767090 28072.636719 20861.300781
v 3908.825684 28072.636719 21111.849609
v 3660.976562 28410.109375 21478.292969
v 4253.332520 28389.287109 20898.406250
v 4013.806152 28596.326172 21236.673828
v 4167.535645 29104.164062 21388.308594
v 4809.275879 27482.753906 20285.115234
v 4852.456055 27787.693359 20317.658203
v 5426.545898 27290.277344 19690.269531
v 5200.908691 27485.244141 19951.662109
v 5122.881836 28019.646484 20134.638672
v 4514.334473 27482.753906 20498.212891
v 4620.501465 28019.646484 20530.591797
v 4903.245117 28180.947266 20342.667969
v 5267.313965 28662.519531 20168.302734
v 5361.475098 29125.003906 20250.197266
v 4559.475586 28616.556641 20735.546875
v 4357.490723 28782.544922 20995.052734
v 4750.746094 29125.003906 20805.074219
v 4536.620605 29311.212891 21163.759766
v 4972.372070 28662.519531 20405.746094
v 5126.509766 29321.630859 20569.304688
v 4891.543945 29518.259766 20939.210938
v 4715.750488 29694.046875 21332.466797
v 5284.799805 29735.726562 20726.791016
v 5098.589355 29911.513672 21125.416016
v 5305.633301 30263.095703 21311.623047
v 6621.985352 27218.658203 17929.863281
v 5939.753418 27373.601562 18975.394531
v 6483.547363 27442.271484 18283.636719
v 6142.189941 27535.240234 18805.472656
v 6580.427734 27850.203125 18498.921875
v 6435.101562 28057.152344 18824.992188
v 5965.640137 28825.796875 16895.525391
v 5900.059570 29252.404297 16994.701172
v 6327.396973 28759.394531 17085.644531
v 6517.515137 28888.300781 17443.742188
v 6123.398926 29252.404297 17289.642578
v 6418.340332 29252.404297 17553.332031
v 6563.292969 28662.519531 19040.408203
v 6631.226562 28958.335938 19139.595703
v 7157.944336 27266.355469 17075.878906
v 6993.831055 27415.277344 17722.824219
v 7191.155273 27829.361328 17909.039062
v 7575.274414 27574.031250 17017.533203
v 7516.927734 27615.167969 17534.386719
v 7810.800781 27778.765625 16782.005859
v 7516.927734 27924.699219 17829.328125
v 6797.899414 27611.910156 18105.667969
v 6963.271484 28036.410156 18291.878906
v 6735.387695 28243.457031 18614.675781
v 7516.927734 28219.638672 18108.490234
v 6927.043945 28752.638672 17075.878906
v 6927.043945 28869.343750 17540.921875
v 6883.775391 29206.564453 17845.113281
v 7486.225586 28908.677734 17119.083984
v 7516.927734 28916.220703 17554.917969
v 7662.384766 29002.982422 16951.257812
v 7516.927734 29021.585938 17849.859375
v 7128.642578 28502.576172 18478.089844
v 6930.027344 28684.531250 18721.367188
v 7051.556641 29372.630859 18057.134766
v 6948.012695 29193.939453 19018.224609
v 7494.909180 28684.531250 18401.742188
v 7283.602539 28895.832031 18575.382812
v 7494.909180 29237.042969 18714.173828
v 5707.253906 27528.568359 19420.789062
v 5474.754883 27683.533203 19752.771484
v 5812.156738 28072.636719 19521.011719
v 5517.214844 28072.636719 19795.232422
v 6053.056641 27766.857422 19151.308594
v 6129.665527 28072.636719 19226.070312
v 5905.910156 28662.519531 19634.007812
v 5610.968262 28662.519531 19873.361328
v 5993.014648 29020.837891 19695.226562
v 5729.324219 29269.548828 20025.656250
v 6268.351562 28662.519531 19339.066406
v 6392.930664 29186.216797 19474.062500
v 6154.634766 29414.095703 19801.113281
v 5465.633789 29518.259766 20333.535156
v 6765.364258 29351.591797 19252.898438
v 5949.996582 29842.287109 16924.142578
v 6032.222656 30147.226562 16801.451172
v 6131.453613 29842.287109 17219.083984
v 6426.395020 29842.287109 17592.154297
v 6351.111816 30422.029297 17077.603516
v 6528.254883 30303.578125 17495.503906
v 6567.224609 30799.613281 16960.501953
v 6721.337891 29842.287109 17887.095703
v 6649.168945 30696.833984 17353.757812
v 6883.654297 30500.199219 17723.376953
v 7239.063477 30696.822266 17951.250000
v 7016.279297 29842.285156 18089.722656
v 7158.619141 29589.875000 19109.435547
v 7118.139648 30303.564453 18036.302734
v 7516.927734 29842.285156 18296.871094
v 7562.889648 29808.816406 19052.580078
v 7468.185547 30472.984375 18146.779297
v 7790.159180 30138.306641 19139.392578
v 6925.417969 31052.884766 17140.107422
v 7042.423828 30912.902344 17557.994141
v 7201.667969 31336.330078 16926.455078
v 7252.264648 31306.158203 17319.710938
v 7442.291992 31099.810547 17733.794922
v 7476.106445 31439.287109 17104.201172
v 7645.520508 31398.820312 17516.337891
v 7632.319336 30893.458984 18057.136719
v 5895.289062 29842.285156 20223.900391
v 6029.642578 30149.804688 20317.660156
v 6547.890137 29673.224609 19646.154297
v 6345.622070 29858.824219 19929.238281
v 6337.161133 30270.531250 20220.833984
v 5575.691895 29896.328125 20564.167969
v 5460.581055 30128.982422 20918.367188
v 5891.499512 30256.687500 20615.181641
v 5698.882812 30470.140625 21156.669922
v 6320.628418 30567.843750 20586.148438
v 6112.978516 30677.185547 21001.716797
v 5937.185059 30797.234375 21394.970703
v 6506.234375 30832.158203 20763.419922
v 6361.686035 31011.322266 21240.005859
v 6610.392578 31336.328125 21478.294922
v 6930.734375 29828.179688 19444.857422
v 6702.849609 30066.480469 19797.023438
v 7096.105469 30242.261719 19636.818359
v 6889.066406 30468.953125 20006.113281
v 7396.903320 29983.132812 19243.564453
v 7583.114258 30386.912109 19479.812500
v 7376.069336 30635.517578 19821.949219
v 6682.028320 30695.642578 20370.164062
v 7075.283203 30832.144531 20215.205078
v 7769.324219 30748.820312 19716.062500
v 7550.389648 30920.234375 20021.265625
v 6909.900391 31028.777344 20598.037109
v 6744.517578 31225.412109 21085.041016
v 7137.773438 31357.148438 20825.910156
v 6935.504883 31426.783203 21251.025391
v 7516.927734 31247.173828 20419.367188
v 7516.927734 31424.105469 20714.308594
v 7516.927734 31656.220703 21205.064453
v 8398.391602 22482.513672 4979.914551
v 8723.192383 22712.962891 4925.438477
v 8937.486328 23134.900391 4968.009277
v 9286.577148 22763.691406 4703.112793
v 9270.102539 23340.347656 4855.800781
v 9876.459961 22763.691406 4511.838867
v 9876.459961 23353.574219 4609.368164
v 9439.727539 23943.457031 4897.874023
v 9518.236328 24409.705078 4947.175293
v 9876.459961 23943.457031 4718.729492
v 9829.504883 24577.134766 4868.293945
v 8163.783203 22712.962891 5018.298828
v 8106.810547 23353.574219 5124.985352
v 8544.231445 22875.771484 5009.677734
v 8723.192383 23340.347656 5062.180664
v 8106.810547 23943.457031 5275.444336
v 8106.810547 24533.341797 5444.580078
v 8696.694336 23943.457031 5238.630859
v 8696.694336 24533.341797 5384.166016
v 9062.490234 23528.156250 5020.310547
v 9144.786133 23943.457031 5092.545898
v 9307.596680 24577.134766 5130.155273
v 9601.572266 24802.960938 4988.843262
v 9979.835938 25123.224609 4913.500000
v 10092.553711 25517.835938 4947.175781
v 8106.810547 24950.712891 5549.458984
v 8106.810547 25245.654297 5645.939453
v 8106.810547 25713.107422 5879.162598
v 8713.852539 25138.208984 5502.065430
v 8528.665039 25344.826172 5611.261719
v 8921.919922 25487.869141 5548.771973
v 8713.852539 25695.941406 5721.645020
v 8106.810547 26085.544922 6101.322754
v 8696.694336 26208.453125 6025.129883
v 8106.810547 26380.486328 6286.902832
v 8122.421875 26914.882812 6610.178223
v 7936.202148 27126.187500 6793.920898
v 8696.694336 26503.394531 6210.710449
v 8696.694336 26892.871094 6450.692871
v 9286.577148 25123.224609 5256.020508
v 9303.736328 25695.941406 5446.584473
v 9118.547852 25881.125000 5637.568848
v 9684.894531 25123.224609 5028.909180
v 9888.139648 25713.921875 5135.628418
v 9511.803711 26077.763672 5527.937988
v 9252.679688 26336.888672 5847.788574
v 9386.811523 26730.146484 6058.007324
v 9918.626953 26285.830078 5452.070801
v 9750.111328 26471.019531 5664.751465
v 10143.367188 26610.498047 5565.957520
v 9925.898438 26866.951172 5897.190918
v 8993.555664 26596.011719 6164.961914
v 9228.740234 26913.214844 6274.040527
v 9708.431641 27123.402344 6212.966309
v 10535.501953 22763.691406 4337.315918
v 10240.560547 22763.691406 4427.284668
v 10642.941406 23353.574219 4368.567383
v 10348.000000 23353.574219 4462.320801
v 11056.226562 22763.691406 4234.363770
v 11056.226562 23353.574219 4312.491699
v 10717.564453 23713.070312 4387.259277
v 10499.099609 23923.201172 4507.350586
v 10466.343750 24533.341797 4640.610352
v 11066.300781 23923.201172 4369.852539
v 10876.388672 24106.326172 4428.927246
v 11269.643555 24323.785156 4387.259277
v 11066.300781 24525.583984 4457.355957
v 11646.109375 22763.691406 4156.235840
v 11646.109375 23353.574219 4249.989258
v 12235.993164 22763.691406 4124.984863
v 12235.993164 23353.574219 4203.112793
v 11646.109375 23943.457031 4312.491699
v 11641.364258 24525.583984 4369.852539
v 11441.573242 24717.041016 4408.093262
v 12235.993164 23943.457031 4265.614746
v 12235.993164 24533.341797 4343.742676
v 10466.343750 25123.224609 4731.530273
v 10465.522461 25713.921875 4877.887207
v 11056.226562 25123.224609 4559.666992
v 11056.226562 25713.107422 4701.485840
v 10661.603516 26086.896484 4946.095703
v 11056.226562 26195.660156 4883.455566
v 11834.828125 24913.671875 4387.259277
v 11641.364258 25115.470703 4452.775879
v 11646.109375 25713.107422 4592.050293
v 12235.993164 25017.976562 4384.192871
v 12235.993164 25312.917969 4425.344727
v 12235.993164 25713.107422 4543.166016
v 11614.815430 26346.783203 4841.117676
v 11790.580078 26622.208984 4958.997070
v 12235.993164 26302.990234 4760.870605
v 12235.993164 26657.716797 4937.991699
v 10268.347656 25911.091797 5030.512207
v 10465.522461 26291.312500 5173.208496
v 10466.343750 26726.158203 5480.206543
v 10466.343750 27021.101562 5724.229980
v 11056.226562 26490.601562 5056.236816
v 11030.412109 26928.927734 5368.441895
v 10816.574219 27149.591797 5611.370605
v 11397.325195 26572.605469 5000.665039
v 11614.815430 26848.451172 5150.461914
v 12235.993164 26952.658203 5147.964844
v 8329.457031 27209.523438 6743.119629
v 8122.417969 27468.156250 7047.098145
v 8308.634766 27810.125000 7300.275879
v 8696.694336 27282.871094 6697.965332
v 8696.694336 27577.814453 6923.654297
v 8696.694336 27896.417969 7218.595703
v 10101.686523 27221.224609 6129.630371
v 9286.577148 27392.242188 6595.291992
v 9286.577148 27687.183594 6829.900879
v 9286.577148 28013.376953 7124.842285
v 9905.059570 27484.916016 6468.924316
v 9708.431641 27748.605469 6782.015625
v 10101.686523 27805.744141 6724.881836
v 9863.390625 28082.533203 7035.289062
v 10018.350586 28421.812500 7288.562988
v 10466.343750 27331.675781 6019.171387
v 11209.830078 27253.763672 5527.937988
v 11034.036133 27496.619141 5864.649902
v 11251.498047 27822.808594 6117.929199
v 10466.343750 27626.617188 6326.843262
v 10466.343750 27920.369141 6621.784668
v 10466.343750 28215.312500 6885.544434
v 10858.243164 27739.472656 6212.858887
v 11023.613281 28077.972656 6453.887207
v 10795.728516 28333.134766 6787.368164
v 10466.343750 28529.884766 7180.486328
v 11188.984375 28433.527344 6694.915527
v 11013.196289 28678.265625 7042.532715
v 11230.664062 28994.636719 7297.696289
v 11646.109375 27333.603516 5474.157715
v 11646.109375 27628.544922 5737.929199
v 11646.109375 27882.728516 6032.870605
v 12235.993164 27380.470703 5442.906738
v 12235.993164 27675.412109 5675.426758
v 12235.993164 27929.607422 5970.368652
v 11646.109375 28177.669922 6348.499512
v 12235.993164 28224.546875 6326.921387
v 11646.109375 28497.013672 6643.441895
v 11646.109375 28791.955078 6964.572754
v 11646.109375 29027.224609 7259.514160
v 12235.993164 28512.638672 6621.863281
v 12235.993164 28807.580078 6948.947266
v 12235.993164 29025.599609 7243.888672
v 7915.379883 27726.787109 7425.280762
v 8109.928711 27923.570312 7628.244629
v 8133.963867 28201.416016 8225.264648
v 8681.824219 28203.085938 7633.717285
v 8475.284180 28328.382812 8027.056641
v 7983.480469 28267.400391 8817.516602
v 7897.113281 28328.382812 9197.702148
v 8348.695312 28399.810547 8420.313477
v 8868.539062 28432.541016 7827.656738
v 8681.824219 28505.216797 8225.264648
v 8278.421875 28431.544922 8817.516602
v 8098.968750 28489.871094 9399.557617
v 8696.694336 28667.953125 8817.516602
v 8736.348633 28809.150391 9394.085938
v 8959.412109 28973.808594 9581.836914
v 9286.577148 28308.318359 7417.695801
v 9625.095703 28359.324219 7351.064941
v 9286.577148 28531.089844 7712.637695
v 9283.257812 28813.664062 8211.100586
v 9477.671875 29019.652344 8396.706055
v 9863.390625 28667.849609 7627.855469
v 9708.431641 28913.886719 8003.450684
v 10101.686523 28971.636719 7904.645020
v 9893.619141 29075.583984 8211.100586
v 9083.930664 28898.929688 8817.516602
v 9021.914062 28943.841797 9188.581055
v 9378.872070 29082.000000 8817.516602
v 9245.755859 29101.427734 9394.085938
v 9876.459961 29303.982422 8817.516602
v 9876.459961 29392.388672 9407.399414
v 8106.810547 28678.542969 9997.282227
v 8106.810547 28850.423828 10587.166016
v 8632.733398 28860.416016 9997.282227
v 8723.847656 28925.830078 10614.060547
v 8927.674805 28993.890625 9997.282227
v 8938.578125 28989.685547 10435.362305
v 8106.810547 28947.472656 11013.539062
v 8106.810547 29009.974609 11308.480469
v 8106.810547 29109.361328 11766.932617
v 8703.354492 28932.974609 11170.632812
v 8904.422852 28929.966797 11589.362305
v 8511.166992 28992.470703 11362.983398
v 8703.354492 29045.478516 11778.367188
v 9128.449219 28950.802734 10828.618164
v 9286.577148 29166.652344 9997.282227
v 9309.676758 29054.054688 10614.060547
v 9876.459961 29385.861328 9997.282227
v 9876.459961 29262.800781 10587.166016
v 9309.676758 28874.281250 11137.639648
v 9286.577148 28858.480469 11629.750000
v 9521.704102 28975.609375 10914.738281
v 9286.577148 29025.599609 11924.691406
v 9686.000977 28852.980469 11307.994141
v 9686.000977 28852.980469 11564.963867
v 9880.162109 29094.642578 11137.639648
v 9880.162109 29117.259766 11763.728516
v 10089.553711 30055.382812 12021.694336
v 9989.187500 30432.171875 11985.015625
v 9960.997070 31022.054688 11972.450195
v 10051.965820 31455.753906 12004.940430
v 10466.343750 28824.826172 7497.912109
v 10466.343750 29027.228516 7792.853516
v 10466.343750 29237.615234 8227.633789
v 10837.409180 28923.007812 7381.032715
v 11042.912109 29110.582031 7601.695801
v 11056.226562 29376.617188 8227.633789
v 10472.550781 29467.007812 8836.223633
v 10268.764648 29519.634766 9407.399414
v 11056.226562 29508.039062 8672.764648
v 11646.109375 29235.992188 7637.750000
v 11646.109375 29437.480469 8227.633789
v 12235.993164 29203.115234 7637.750000
v 12235.993164 29374.988281 8227.633789
v 11646.109375 29523.656250 8613.087891
v 12235.993164 29492.414062 8620.972656
v 10276.190430 29508.039062 9997.282227
v 10385.560547 29461.171875 10587.166016
v 10437.504883 29410.271484 11177.048828
v 10520.045898 29403.337891 11718.832031
v 11030.934570 29504.412109 11894.742188
v 10673.315430 29552.386719 9045.323242
v 10563.706055 29570.533203 9407.399414
v 11056.226562 29554.906250 8967.706055
v 11056.226562 29609.343750 9407.399414
v 11646.109375 29570.533203 8908.030273
v 11646.109375 29687.472656 9407.399414
v 12235.993164 29648.660156 8915.915039
v 12263.262695 29929.876953 9440.867188
v 12478.069336 30169.261719 9659.807617
v 10571.131836 29586.158203 9997.282227
v 10680.501953 29573.359375 10587.166016
v 11056.226562 29687.472656 9997.282227
v 11056.226562 29705.923828 10587.166016
v 10732.446289 29557.732422 11177.048828
v 11043.580078 29747.441406 11780.807617
v 10466.343750 30432.171875 11875.942383
v 11056.226562 29674.673828 11177.048828
v 11056.226562 30432.171875 11846.788086
v 10466.343750 31022.054688 11847.751953
v 10479.571289 31636.203125 11971.835938
v 11056.226562 31022.054688 11837.775391
v 11100.979492 31664.423828 11968.617188
v 11646.109375 29859.353516 9997.282227
v 11646.109375 29936.589844 10587.166016
v 12144.787109 30052.980469 9997.282227
v 12096.793945 30098.966797 10587.166016
v 12439.728516 30212.810547 9997.282227
v 12394.883789 30414.427734 10621.462891
v 11684.987305 29979.166016 11203.424805
v 11473.499023 29892.945312 11680.326172
v 11907.532227 30312.494141 11417.636719
v 11684.987305 30478.341797 11628.023438
v 12020.823242 30111.126953 11024.381836
v 12087.088867 30478.341797 11203.424805
v 11949.200195 30705.751953 11480.139648
v 12489.782227 30789.099609 10840.955078
v 11646.109375 31022.054688 11743.374023
v 11646.109375 31595.681641 11937.409180
v 12355.963867 31000.257812 11205.039062
v 12048.144531 31022.054688 11547.832031
v 12468.948242 31368.650391 11420.325195
v 12220.241211 31632.343750 11777.168945
v 12825.875977 22763.691406 4093.733398
v 12825.875977 23353.574219 4163.166504
v 13415.759766 22763.691406 4031.231201
v 13415.759766 23353.574219 4116.290039
v 12825.875977 23943.457031 4225.668945
v 12825.875977 24533.341797 4317.487305
v 13415.759766 23943.457031 4178.791992
v 13415.759766 24533.341797 4254.984863
v 14005.642578 22763.691406 4015.605713
v 14005.642578 23353.574219 4093.733643
v 14595.525391 22763.691406 4031.231201
v 14595.525391 23353.574219 4103.490723
v 14005.642578 23943.457031 4156.235840
v 14005.642578 24533.341797 4231.391602
v 14595.525391 23943.457031 4212.869629
v 14595.525391 24533.341797 4309.519531
v 12825.875977 25079.587891 4373.562500
v 12825.875977 25374.529297 4415.443848
v 12825.875977 25713.107422 4517.640625
v 13425.054688 25164.759766 4348.848145
v 13234.625000 25389.074219 4408.093262
v 13627.879883 25430.740234 4387.259277
v 13425.054688 25661.662109 4483.970215
v 12825.875977 26302.990234 4736.380371
v 12825.875977 26673.341797 4929.125977
v 13472.169922 26359.402344 4807.419434
v 13313.149414 26643.044922 4947.175781
v 14024.558594 25154.634766 4342.474121
v 14233.797852 25372.205078 4408.093262
v 13840.541992 25430.740234 4387.259277
v 14024.558594 25661.662109 4507.351074
v 14595.525391 24988.806641 4365.595215
v 14595.525391 25283.748047 4441.861328
v 14595.525391 25713.107422 4604.526367
v 14014.946289 26359.402344 4850.393066
v 14217.775391 26601.376953 4979.831055
v 14590.982422 26339.046875 4875.387207
v 14391.325195 26601.376953 4979.831055
v 12825.875977 26968.283203 5147.964844
v 13706.404297 26593.636719 4987.571777
v 13472.169922 26860.951172 5147.314941
v 13824.520508 26593.636719 4987.571777
v 14014.946289 26835.951172 5184.816406
v 14784.580078 26559.712891 5005.825684
v 14598.370117 26885.900391 5277.353027
v 14805.414062 27170.425781 5611.370605
v 15185.408203 22763.691406 4104.453613
v 15185.408203 23353.574219 4165.993164
v 15775.292969 22763.691406 4221.641113
v 15775.292969 23353.574219 4234.363770
v 15185.408203 23943.457031 4288.099121
v 15186.345703 24555.345703 4380.034180
v 15383.595703 24766.644531 4408.093262
v 15775.292969 23943.457031 4293.967773
v 15775.292969 24442.818359 4365.668945
v 15775.292969 24737.759766 4415.443848
v 16365.175781 22763.691406 4273.423340
v 16365.175781 23353.574219 4249.989258
v 16955.058594 22763.691406 4234.363770
v 16955.058594 23353.574219 4171.861328
v 16365.175781 23943.457031 4256.830078
v 16329.121094 24556.894531 4321.456543
v 16108.457031 24769.224609 4408.093262
v 16955.058594 23943.457031 4131.825195
v 16955.058594 24533.341797 4126.992188
v 14990.341797 24891.648438 4387.259277
v 15186.345703 25102.255859 4474.623047
v 15185.408203 25713.107422 4677.820801
v 15775.292969 25123.224609 4508.855469
v 15775.292969 25713.107422 4680.719238
v 15185.408203 26214.414062 4882.249512
v 15775.292969 26183.169922 4882.249512
v 16507.470703 25123.224609 4363.733887
v 16212.529297 25123.224609 4444.759766
v 16614.992188 25463.279297 4387.259277
v 16397.089844 25681.185547 4544.916016
v 16955.058594 25123.224609 4198.279297
v 16955.058594 25586.429688 4321.690918
v 16955.058594 25881.371094 4466.352539
v 16365.175781 26223.197266 4837.396973
v 16936.978516 26346.074219 4791.123535
v 17121.550781 26643.044922 4958.997070
v 15185.408203 26509.357422 5044.481445
v 15185.408203 26835.539062 5339.423340
v 15185.408203 27130.480469 5672.447754
v 15775.292969 26478.111328 5087.487793
v 15775.292969 26788.662109 5382.429199
v 15782.666016 27091.878906 5865.615723
v 15973.185547 27170.089844 6457.983398
v 16026.861328 27185.125000 6897.887695
v 16365.175781 26518.138672 5063.077637
v 16365.175781 26785.998047 5358.019043
v 16365.175781 27033.900391 5868.100098
v 16728.294922 26571.421875 5009.786133
v 16936.978516 26798.322266 5235.135254
v 16955.058594 27062.486328 5868.100098
v 16365.175781 27107.425781 6457.983398
v 16365.175781 27154.464844 6954.743164
v 16988.519531 27125.117188 6453.950684
v 16868.146484 27156.480469 6993.492188
v 12825.875977 27364.845703 5442.906738
v 12825.875977 27659.787109 5691.052246
v 12825.875977 27923.496094 5985.993652
v 13415.759766 27291.218750 5480.044434
v 13415.759766 27586.160156 5769.180176
v 13415.759766 27860.990234 6064.121582
v 12825.875977 28218.435547 6373.637207
v 13359.680664 28175.333984 6501.563477
v 13518.921875 28329.369141 6791.136719
v 12825.875977 28450.882812 6668.579102
v 12844.202148 28753.552734 7067.287109
v 12659.791016 28992.470703 7276.862305
v 13125.666016 28391.871094 6727.244629
v 13359.680664 28560.572266 7011.805664
v 14005.642578 27226.060547 5526.920898
v 14019.079102 27551.785156 5912.520996
v 13831.408203 27801.974609 6138.763184
v 14412.159180 27208.542969 5548.880371
v 14603.482422 27360.101562 5832.038574
v 14224.665039 27743.437500 6218.137207
v 14019.079102 27919.269531 6432.052246
v 14005.642578 28231.396484 6843.348145
v 14596.461914 27684.138672 6432.052246
v 14793.712891 27748.605469 6772.774902
v 14400.458008 27830.957031 6611.392578
v 14596.461914 28045.605469 6851.157227
v 14017.012695 28698.574219 7113.005859
v 14221.219727 29113.511719 7232.495605
v 14595.525391 28662.521484 6959.947754
v 14554.827148 29287.044922 7142.658691
v 14724.323242 29604.160156 7270.321289
v 15185.408203 27297.023438 5967.389160
v 15590.953125 27229.373047 6060.587402
v 15185.408203 27485.095703 6457.983398
v 15185.408203 27670.828125 6894.104004
v 15216.882812 28043.093750 7138.732422
v 15678.244141 27281.404297 6457.983398
v 15767.726562 27457.253906 7106.228516
v 15508.589844 27826.769531 7314.569336
v 15093.427734 28662.521484 7128.389160
v 15046.560547 29252.404297 7175.355957
v 16365.175781 27257.732422 7249.684570
v 17207.457031 27229.373047 6647.890137
v 16995.431641 27281.087891 7109.930664
v 14978.748047 29604.160156 7270.321289
v 13019.161133 28908.173828 7637.750000
v 13053.046875 28949.410156 7963.174805
v 12724.219727 29056.851562 7637.750000
v 12843.049805 29272.433594 8218.278320
v 13387.558594 28895.097656 7601.695801
v 13172.130859 28949.410156 7963.174805
v 13565.385742 29054.972656 7774.287598
v 13387.558594 29251.923828 8077.901855
v 12633.052734 29489.896484 8603.846680
v 13827.964844 28919.238281 7381.032715
v 14033.288086 29280.873047 7594.625000
v 13845.354492 29448.228516 7996.790039
v 14331.066406 29506.767578 7414.961914
v 13026.308594 29601.578125 8473.381836
v 13415.759766 29732.431641 8386.283203
v 12828.159180 29757.599609 8807.291992
v 12825.875977 30064.429688 9250.889648
v 12825.875977 30236.310547 9545.832031
v 13375.060547 30043.554688 8764.317383
v 13151.300781 30127.580078 9142.941406
v 13544.556641 30258.140625 8925.479492
v 13375.060547 30387.490234 9366.701172
v 14238.609375 29571.623047 7808.217773
v 13979.480469 29852.386719 8216.291992
v 14113.604492 30220.044922 8435.793945
v 14554.827148 29628.080078 7622.053711
v 14595.525391 29900.595703 8081.836914
v 14595.525391 30311.292969 8376.778320
v 13720.349609 30133.150391 8532.223633
v 13989.896484 30435.718750 8810.202148
v 13827.704102 30669.939453 9407.399414
v 14595.525391 30606.234375 8687.345703
v 14259.444336 30747.427734 9088.179688
v 14122.645508 30811.310547 9407.399414
v 14595.525391 30810.566406 8982.287109
v 14595.525391 30994.623047 9407.399414
v 12825.875977 30434.943359 9997.282227
v 12825.875977 30630.802734 10409.227539
v 13357.087891 30668.556641 9938.604492
v 13121.345703 30726.583984 10292.752930
v 12825.875977 30905.060547 10704.168945
v 13514.601562 30832.146484 10096.112305
v 13349.211914 31063.896484 10555.741211
v 13577.079102 31359.527344 10818.729492
v 12825.875977 31200.001953 11021.423828
v 12825.875977 31456.978516 11316.365234
v 12825.875977 31751.919922 11611.306641
v 13183.824219 31295.646484 10922.899414
v 13394.574219 31529.501953 11142.536133
v 13415.759766 31845.671875 11548.808594
v 13711.217773 30726.597656 9702.856445
v 14848.894531 30137.228516 11430.418945
v 14848.894531 30137.228516 11477.247070
v 14793.027344 30376.335938 11387.050781
v 14793.027344 30376.335938 11543.242188
v 13946.963867 30943.447266 9938.604492
v 14005.642578 31223.509766 10445.231445
v 14005.642578 31394.636719 10740.172852
v 14595.525391 31148.945312 9997.282227
v 14613.016602 31240.839844 10570.633789
v 14428.048828 31377.986328 10756.239258
v 14005.642578 31575.845703 11177.048828
v 14005.642578 31793.146484 11577.087891
v 14673.372070 31050.619141 11176.041016
v 14670.971680 31022.054688 11642.234375
v 14414.778320 31411.453125 11177.048828
v 14551.414062 31591.921875 11667.784180
v 15434.494141 28220.025391 7448.687988
v 15918.253906 27653.267578 7637.749512
v 16035.982422 27746.025391 7934.287109
v 15611.669922 28043.093750 7642.289551
v 15918.261719 28072.638672 7950.710938
v 15388.371094 28662.521484 7550.355469
v 15362.761719 29304.884766 7681.270996
v 15469.501953 29536.498047 7943.540527
v 15506.443359 28662.521484 7845.296875
v 15801.384766 28662.521484 7981.962891
v 15486.890625 29143.242188 7906.913086
v 15720.228516 29304.884766 8003.618652
v 16365.175781 27458.291016 7637.749512
v 16365.175781 27683.312500 7935.085449
v 16365.175781 28072.638672 7968.730957
v 16986.250000 27508.162109 7576.051270
v 16795.837891 27683.521484 7934.287109
v 17158.640625 28072.638672 7778.838867
v 16863.699219 28072.638672 7950.710938
v 16365.175781 28662.521484 8015.607910
v 16629.166016 29500.613281 7913.454102
v 16405.591797 29283.353516 8010.567383
v 17122.394531 28662.521484 7789.469238
v 16827.453125 28662.521484 7966.336914
v 16948.505859 29283.353516 7769.076660
v 16747.509766 29107.357422 7955.122070
v 15096.011719 29630.054688 7637.750000
v 15237.886719 29815.378906 8043.568359
v 15239.234375 30462.744141 8386.473633
v 15775.292969 29842.287109 8100.675781
v 15775.292969 30432.171875 8304.842773
v 15078.490234 30679.755859 8569.919922
v 15471.746094 30735.716797 8515.049805
v 15775.292969 30776.175781 8488.011719
v 15239.234375 30876.419922 8786.934570
v 15185.408203 31153.107422 9407.399414
v 15775.292969 31031.351562 8817.516602
v 15783.630859 31271.781250 9400.270508
v 15985.818359 31336.330078 9592.145508
v 16629.166016 29666.673828 7913.454102
v 16405.591797 29854.896484 8016.040039
v 16365.175781 30432.171875 8180.963867
v 16917.449219 29854.896484 7798.066895
v 16695.748047 30059.929688 7943.409180
v 17089.003906 30256.544922 7871.785645
v 16917.449219 30444.771484 8044.396484
v 16365.175781 30852.369141 8419.793945
v 16955.058594 30893.601562 8359.226562
v 16358.039062 31177.841797 8822.880859
v 16156.654297 31311.318359 9198.891602
v 16549.910156 31357.150391 9023.084961
v 16358.039062 31389.285156 9400.270508
v 16955.058594 31188.542969 8660.991211
v 16955.058594 31392.855469 8955.932617
v 16976.544922 31650.232422 9407.298828
v 15367.142578 30668.066406 10748.066406
v 15801.732422 30685.181641 10756.375977
v 14890.466797 30137.228516 11430.418945
v 14890.466797 30137.228516 11477.247070
v 15106.349609 30485.734375 11219.839844
v 14949.873047 30376.335938 11543.242188
v 15801.732422 30685.181641 10924.037109
v 15185.408203 31161.306641 9997.282227
v 15176.472656 30965.371094 10565.729492
v 15706.101562 31226.060547 9997.282227
v 15842.564453 30972.595703 10496.725586
v 16001.042969 31337.373047 9997.282227
v 15185.826172 31045.613281 11676.282227
v 15185.408203 31611.937500 11757.629883
v 15798.527344 30992.531250 11197.865234
v 15581.064453 31257.949219 11585.486328
v 15944.941406 31603.392578 11261.237305
v 15686.902344 31564.550781 11564.307617
v 16120.158203 30716.275391 10806.596680
v 16120.158203 30716.275391 10892.944336
v 16168.236328 31022.054688 10699.506836
v 16396.189453 31605.845703 10022.175781
v 16794.242188 31771.242188 9842.143555
v 16168.236328 31022.054688 11016.518555
v 16130.791016 31451.648438 11155.861328
v 8090.218750 24138.685547 14958.687500
v 8152.525391 24158.626953 15072.308594
v 7986.374023 24287.902344 14941.154297
v 8090.218750 24275.525391 15087.562500
v 11284.790039 26531.554688 17844.910156
v 11275.668945 27155.367188 17268.042969
v 11158.303711 26932.392578 17655.275391
v 10736.574219 27121.431641 18384.011719
v 10736.574219 27121.431641 18742.054688
v 11204.723633 26451.490234 18255.646484
v 11222.288086 26469.050781 18721.222656
v 10890.322266 26912.031250 18214.687500
v 11037.885742 26912.031250 18882.728516
v 11908.599609 25977.972656 17954.152344
v 11947.604492 25977.972656 17954.152344
v 11856.527344 25239.875000 18450.390625
v 11856.527344 25239.875000 18700.386719
v 11781.037109 25754.046875 18254.515625
v 11765.372070 25713.103516 18790.021484
v 12039.858398 25136.976562 18475.439453
v 12203.550781 25132.390625 18710.162109
v 12087.306641 25754.046875 18254.515625
v 12256.282227 25713.103516 18792.250000
v 11685.626953 26322.154297 17770.156250
v 11646.109375 27038.546875 17216.654297
v 11980.249023 26812.804688 17548.925781
v 11987.301758 26361.976562 17721.656250
v 11994.913086 26915.410156 17293.738281
v 11509.485352 26156.548828 18255.646484
v 11615.269531 26284.650391 18857.015625
v 11919.029297 27069.251953 18037.595703
v 11646.109375 26892.869141 19078.113281
v 12130.790039 26302.986328 18255.646484
v 12251.073242 26302.986328 18818.244141
v 12049.039062 26880.722656 18242.792969
v 12155.227539 26833.882812 18826.417969
v 8106.810547 29187.490234 12356.815430
v 8140.143555 29356.431641 12980.023438
v 8794.456055 29297.023438 12454.578125
v 8695.866211 29383.042969 12767.148438
v 7927.269531 29383.042969 13504.502930
v 9227.588867 29293.929688 12347.289062
v 9876.459961 29383.042969 12144.087891
v 7956.626953 28285.527344 16087.965820
v 8134.677734 28139.160156 16440.279297
v 8696.694336 28266.662109 16612.917969
v 8080.875977 28611.615234 16012.087891
v 8349.883789 28389.697266 16213.174805
v 8106.810547 29043.007812 16147.392578
v 8165.798828 29223.500000 16467.916016
v 8600.923828 28726.941406 16174.540039
v 8731.162109 28607.154297 16291.187500
v 8470.686523 29035.328125 16169.034180
v 8684.102539 29225.173828 16419.460938
v 9286.577148 28338.093750 16737.914062
v 9687.189453 28359.730469 16773.089844
v 9222.737305 28630.560547 16571.144531
v 9043.345703 29154.699219 16539.632812
v 9687.189453 28436.515625 16773.089844
v 8318.206055 29842.287109 13158.076172
v 8339.954102 30432.171875 13179.831055
v 8939.322266 29842.287109 12615.078125
v 8644.380859 29842.287109 12863.134766
v 8919.916016 30432.171875 12595.680664
v 8624.974609 30432.171875 12884.889648
v 8023.264648 29842.287109 13499.894531
v 8036.007812 30386.921875 13591.883789
v 7868.961914 30571.126953 14126.464844
v 8387.990234 30761.712891 13227.875000
v 8964.656250 30824.214844 12624.789062
v 8732.967773 30989.589844 12968.745117
v 8894.534180 31414.085938 13102.870117
v 8296.192383 30983.824219 13562.302734
v 8090.276367 31022.054688 14126.464844
v 8373.500977 31345.251953 13776.078125
v 8328.125000 31402.230469 14126.464844
v 8501.278320 31154.968750 13382.823242
v 8742.748047 31576.296875 13600.290039
v 8638.692383 31697.171875 14126.464844
v 9286.577148 29842.287109 12409.434570
v 9286.577148 30432.171875 12338.398438
v 9886.339844 29852.166016 12148.959961
v 9694.246094 30432.171875 12099.534180
v 9249.802734 31021.328125 12433.559570
v 9028.659180 31217.470703 12709.615234
v 9458.332031 31611.937500 12532.207031
v 9187.092773 31611.203125 12922.425781
v 9666.054688 31022.054688 12104.294922
v 9863.787109 31636.203125 12224.409180
v 9088.389648 31807.339844 13424.502930
v 7825.286133 30692.861328 14544.346680
v 7984.470703 31005.138672 14731.124023
v 7959.412109 31190.490234 15196.527344
v 8312.499023 31430.650391 14716.348633
v 8136.348633 31387.617188 15358.385742
v 8607.441406 31725.591797 14716.348633
v 8726.231445 31726.658203 15336.935547
v 8106.810547 31525.119141 15896.114258
v 8106.810547 31671.693359 16485.998047
v 8696.694336 31698.921875 15896.114258
v 8696.694336 31747.886719 16485.998047
v 9005.052734 31893.460938 15554.032227
v 9028.278320 31871.126953 15896.114258
v 9114.137695 31841.964844 16485.998047
v 10466.343750 29445.699219 12097.211914
v 10924.189453 29490.099609 12082.912109
v 10466.343750 29684.240234 12097.211914
v 10924.189453 29615.093750 12082.912109
v 10291.761719 31849.009766 12098.909180
v 11327.441406 31896.041016 12062.078125
v 11646.109375 31890.623047 12070.155273
v 11971.534180 31896.041016 12072.710938
v 7925.484375 27726.787109 17175.261719
v 7925.484375 27726.787109 17443.945312
v 8115.991211 27859.273438 17017.533203
v 8115.991211 27975.716797 17650.648438
v 8696.694336 28058.308594 17075.878906
v 8696.694336 28080.792969 17665.763672
v 8106.810547 28289.144531 18054.611328
v 8696.694336 28289.144531 18039.138672
v 7818.733398 28950.802734 17344.515625
v 7818.733398 28950.802734 17462.402344
v 8051.941406 29075.951172 17119.083984
v 8051.941406 29105.480469 17661.722656
v 8696.694336 29164.123047 17075.878906
v 8696.694336 29263.535156 17665.763672
v 8106.810547 28662.519531 18271.750000
v 8106.810547 29361.470703 18705.222656
v 8750.978516 28716.804688 18346.261719
v 8983.796875 28949.621094 18554.548828
v 8750.978516 29237.042969 18701.673828
v 9286.577148 28154.294922 17075.878906
v 9286.577148 28083.916016 17665.763672
v 10167.525391 27773.820312 17777.062500
v 9880.874023 28179.166016 17035.699219
v 9933.123047 27899.402344 17614.566406
v 9286.577148 28267.712891 18106.402344
v 10167.525391 27773.820312 17977.675781
v 9912.270508 28061.517578 18236.804688
v 10050.271484 28229.576172 18653.355469
v 9474.957031 28856.697266 17075.878906
v 9567.117188 28950.802734 17385.222656
v 9180.015625 29050.154297 17075.878906
v 9336.924805 29164.292969 17615.416016
v 9880.874023 28586.062500 17035.699219
v 9876.459961 28883.925781 17481.406250
v 9876.459961 29094.951172 17776.347656
v 9286.577148 28554.917969 18401.343750
v 9286.577148 28849.859375 18613.162109
v 9286.577148 29468.015625 18019.660156
v 9286.577148 29252.402344 18834.080078
v 9657.015625 28428.576172 18495.933594
v 9862.769531 28640.128906 18737.308594
v 9876.459961 29389.890625 18050.912109
v 9882.286133 29270.734375 19013.984375
v 10082.796875 29479.585938 19187.408203
v 8106.810547 29842.285156 18348.894531
v 8106.810547 29842.285156 18995.484375
v 8106.810547 30432.169922 18328.123047
v 8106.810547 30154.472656 19135.792969
v 8696.694336 29842.285156 18235.736328
v 8707.999023 29878.591797 19050.130859
v 8696.694336 30432.169922 18281.248047
v 8518.908203 30159.142578 19135.312500
v 8106.810547 31293.162109 17915.441406
v 8106.810547 31626.015625 17075.880859
v 8106.810547 31440.775391 17620.500000
v 8696.694336 31293.314453 17931.220703
v 8696.694336 31658.310547 17075.880859
v 8696.694336 31441.820312 17636.279297
v 8106.810547 30998.218750 18120.976562
v 8696.694336 30998.371094 18105.351562
v 9286.577148 29842.285156 18164.304688
v 9286.577148 29716.228516 19066.447266
v 9286.577148 30432.169922 18208.833984
v 9876.459961 29842.285156 18183.953125
v 9689.541992 29613.699219 19114.476562
v 9876.459961 30432.169922 18160.095703
v 9286.577148 31240.632812 17899.968750
v 9304.327148 31751.906250 17058.130859
v 9286.577148 31457.445312 17605.027344
v 9876.459961 31150.902344 17857.115234
v 9876.459961 31830.515625 17267.970703
v 9876.459961 31535.574219 17562.173828
v 9286.577148 30945.689453 18064.189453
v 9876.459961 30855.958984 18027.052734
v 8106.810547 30449.414062 19392.632812
v 8912.163086 30099.423828 19160.226562
v 8707.999023 30386.330078 19341.552734
v 8106.810547 30782.150391 19687.574219
v 8059.796875 31124.171875 20058.636719
v 8225.083008 31338.908203 20277.490234
v 8696.694336 30797.929688 19671.949219
v 8696.694336 31092.871094 19976.800781
v 8696.694336 31349.863281 20271.742188
v 7831.827148 31315.492188 20339.992188
v 8059.796875 31478.332031 20568.044922
v 8066.825195 31812.734375 21207.929688
v 8696.694336 31581.978516 20615.181641
v 8696.694336 31844.050781 21033.507812
v 9286.577148 30011.169922 19213.919922
v 9317.403320 30479.304688 19532.083984
v 9534.582031 30707.355469 19750.109375
v 9882.286133 29823.109375 19299.937500
v 9876.459961 30328.443359 19599.546875
v 9876.459961 30623.384766 19802.839844
v 9141.326172 30769.857422 19695.228516
v 9337.954102 31033.548828 20024.218750
v 9141.326172 31338.908203 20298.326172
v 9876.459961 30945.544922 20097.781250
v 9534.582031 31297.238281 20346.341797
v 9317.403320 31510.363281 20571.853516
v 9286.577148 31837.210938 21022.642578
v 9876.459961 31240.486328 20428.726562
v 9876.459961 31472.925781 20723.669922
v 9876.459961 31767.867188 21085.144531
v 10583.007812 27643.464844 17268.042969
v 10418.365234 27594.884766 17614.566406
v 10418.365234 28021.441406 17159.335938
v 10189.750977 27790.683594 17383.806641
v 11069.915039 27461.203125 17185.820312
v 10864.930664 27257.146484 17665.763672
v 11056.226562 28072.638672 17076.257812
v 10472.883789 27495.839844 18180.843750
v 10589.490234 27489.292969 18901.421875
v 10209.193359 27836.320312 18370.929688
v 10294.195312 28048.824219 18848.199219
v 10778.350586 27217.863281 17990.755859
v 11056.226562 27336.009766 19132.730469
v 10466.343750 28494.187500 17183.548828
v 10466.343750 28789.128906 17567.562500
v 10518.425781 29231.564453 17875.238281
v 11112.310547 28641.675781 17255.597656
v 11148.889648 28887.703125 17727.171875
v 10292.679688 28662.519531 19019.328125
v 10356.520508 29414.298828 18031.259766
v 10260.090820 29086.330078 19072.808594
v 11336.656250 28919.349609 18255.646484
v 11338.279297 28913.107422 18594.941406
v 11286.071289 29252.402344 18255.646484
v 11309.083008 29309.773438 18813.152344
v 11722.995117 27514.052734 17165.265625
v 11863.009766 27461.326172 17619.332031
v 11629.505859 28013.650391 17185.820312
v 11699.071289 28072.638672 17665.763672
v 11956.749023 27382.232422 17216.654297
v 11961.981445 27250.412109 17391.751953
v 11894.211914 27577.833984 18271.218750
v 11769.743164 27558.755859 18898.335938
v 11732.448242 28013.648438 18287.185547
v 11827.786133 28072.636719 18720.605469
v 11984.064453 27477.904297 18426.474609
v 11955.938477 28072.636719 19015.546875
v 11617.839844 28721.509766 17257.082031
v 11538.962891 28717.630859 17720.873047
v 11439.097656 28624.404297 18255.646484
v 11639.551758 28659.234375 18854.707031
v 11482.605469 29151.394531 18988.195312
v 11958.008789 28405.361328 19114.476562
v 10658.506836 27690.277344 19156.144531
v 10591.492188 28072.636719 19163.982422
v 11056.226562 27630.951172 19163.982422
v 11056.226562 28072.636719 19187.492188
v 10587.622070 28662.519531 19179.607422
v 10460.568359 29270.734375 19274.937500
v 11116.905273 28733.398438 19389.279297
v 11275.897461 28902.591797 19736.894531
v 11252.670898 29252.402344 19746.056641
v 11646.109375 27694.343750 19154.396484
v 11646.109375 28072.636719 19177.906250
v 11943.944336 27774.802734 19143.363281
v 11955.938477 28072.636719 19154.396484
v 11965.953125 28668.257812 19425.685547
v 11646.109375 28896.578125 19771.416016
v 11659.153320 29292.228516 19395.025391
v 11743.080078 29349.371094 19766.271484
v 11973.899414 28931.154297 19778.562500
v 11973.899414 29151.400391 19695.226562
v 11965.686523 29250.386719 19768.527344
v 10749.776367 29563.896484 17949.195312
v 10632.392578 30556.562500 17890.462891
v 11002.833008 30388.830078 17771.767578
v 10518.425781 29793.226562 18057.208984
v 10447.996094 30388.828125 18030.525391
v 11095.520508 29881.558594 18136.714844
v 11296.583008 29865.964844 18894.210938
v 11044.027344 30194.359375 18195.388672
v 11317.445312 30225.412109 18730.041016
v 10447.996094 30991.212891 17811.587891
v 10186.006836 31897.636719 17361.583984
v 10416.118164 31665.380859 17519.259766
v 11056.226562 31022.054688 17646.552734
v 11056.226562 31611.937500 17536.865234
v 10239.136719 30774.023438 17986.787109
v 11569.451172 30491.158203 17721.060547
v 12438.680664 30722.828125 17309.712891
v 12314.273438 30723.898438 17403.271484
v 11359.101562 30078.378906 19123.294922
v 11489.163086 30426.091797 18236.728516
v 11448.377930 30426.091797 18894.212891
v 11715.314453 30952.847656 17667.353516
v 11805.618164 31813.113281 17318.726562
v 11623.837891 31614.666016 17434.207031
v 12375.803711 31022.054688 17263.533203
v 12189.482422 30994.111328 17567.429688
v 12226.229492 31614.666016 17178.728516
v 12023.090820 31419.857422 17393.048828
v 11797.028320 30871.134766 18255.648438
v 11761.672852 30908.333984 18845.531250
v 12214.693359 31181.195312 18217.916016
v 12070.392578 31203.275391 18845.531250
v 12397.121094 31388.306641 18389.388672
v 12365.333984 31416.220703 18845.531250
v 10479.196289 29880.138672 19573.384766
v 10684.393555 30102.003906 19744.746094
v 10291.137695 30215.308594 19674.394531
v 10479.196289 30420.029297 19871.980469
v 11081.580078 29880.138672 19789.050781
v 11088.600586 30477.041016 20103.224609
v 11306.811523 30703.582031 20343.769531
v 10466.343750 30848.964844 20191.535156
v 10913.556641 30775.210938 20268.371094
v 10466.343750 31143.906250 20533.335938
v 10466.343750 31391.976562 20828.277344
v 10491.690430 31724.529297 21232.931641
v 11078.939453 31030.375000 20611.421875
v 11244.322266 31285.537109 20941.578125
v 10851.065430 31344.265625 20879.074219
v 11051.107422 31519.050781 21164.949219
v 11560.630859 29865.964844 19378.041016
v 11718.381836 29842.285156 19808.533203
v 11734.981445 30450.365234 19466.111328
v 11719.724609 30307.587891 19996.621094
v 11988.204102 30659.125000 19683.203125
v 12146.503906 30441.669922 20086.257812
v 11646.109375 30591.228516 20471.748047
v 12218.340820 30394.312500 20602.548828
v 12352.452148 30548.628906 21088.617188
v 11835.692383 30834.929688 19289.947266
v 12216.075195 31059.539062 19476.167969
v 12381.459961 30890.890625 19900.677734
v 12443.946289 31377.984375 19269.132812
v 11646.109375 30864.599609 20766.689453
v 11703.485352 31190.130859 21164.949219
v 11545.107422 31440.486328 21334.833984
v 11959.197266 30745.255859 20891.976562
v 12187.892578 30865.953125 21253.171875
v 14236.786133 31843.072266 14295.095703
v 14544.778320 31859.023438 14182.092773
v 13111.888672 30621.640625 16772.011719
v 13415.800781 30430.859375 16771.314453
v 13682.125977 31854.775391 15507.407227
v 13110.103516 30985.496094 16770.224609
v 12990.070312 31611.937500 16697.080078
v 13673.644531 31091.162109 16054.359375
v 13596.763672 31639.664062 15887.243164
v 13473.491211 31611.937500 16484.248047
v 14257.619141 31253.187500 14947.481445
v 14152.289062 31269.140625 15221.409180
v 14130.265625 31632.642578 14737.052734
v 13989.754883 31666.134766 15325.905273
v 14340.944336 31253.187500 14947.481445
v 14340.944336 31253.187500 15094.820312
v 14417.055664 31632.642578 14737.052734
v 14349.450195 31611.937500 15120.959961
v 13755.464844 31136.330078 15963.722656
v 13743.440430 31212.513672 16223.795898
v 13832.883789 31585.886719 15839.565430
v 13760.701172 31611.937500 16271.416016
v 14272.312500 28146.806641 21261.662109
v 14491.991211 28023.767578 21291.605469
v 14099.871094 28721.507812 21199.992188
v 14442.159180 28662.519531 21249.994141
v 14339.552734 29058.935547 21333.330078
v 12866.020508 30589.544922 17096.927734
v 12769.458984 30715.777344 17380.421875
v 13397.262695 30425.710938 16957.353516
v 13268.036133 30712.505859 17385.427734
v 12819.089844 30942.431641 17004.355469
v 12769.458984 30915.080078 17616.375000
v 12695.128906 31611.937500 16874.837891
v 13474.142578 30985.496094 17016.892578
v 13373.311523 31048.121094 17615.541016
v 13562.473633 31611.937500 17075.880859
v 13531.222656 31611.937500 17665.765625
v 12825.875977 31257.011719 18075.306641
v 12825.875977 31400.593750 18370.248047
v 12825.875977 31523.330078 18845.531250
v 13275.047852 31275.841797 18196.205078
v 13360.439453 31533.699219 18314.333984
v 13420.265625 31608.976562 18825.986328
v 13723.793945 31758.146484 19101.384766
v 12578.075195 30679.970703 20293.933594
v 12839.485352 30124.337891 20819.105469
v 12942.335938 30120.042969 21046.935547
v 12727.452148 30377.607422 20657.767578
v 12745.702148 30372.835938 21264.404297
v 13133.922852 30120.042969 20898.408203
v 13394.378906 29961.324219 21162.968750
v 13364.633789 30488.701172 20856.111328
v 12578.075195 31284.146484 19662.386719
v 12774.703125 31080.371094 20076.470703
v 12795.171875 31451.777344 19453.621094
v 12971.331055 31377.984375 19859.009766
v 13251.282227 31269.853516 20252.265625
v 13415.759766 31499.968750 19435.414062
v 13435.050781 31383.091797 20043.501953
v 12971.331055 30876.597656 20442.652344
v 12549.068359 30745.246094 21481.873047
v 13435.050781 31052.755859 20519.259766
v 13644.539062 31333.746094 20336.994141
v 13964.724609 29842.285156 21249.994141
v 13727.886719 30723.017578 20906.031250
v 13972.729492 30528.435547 21140.515625
v 13787.937500 31672.173828 19435.414062
v 13904.451172 31582.453125 20084.287109
v 13941.262695 31082.509766 20669.568359
v 14165.729492 30816.730469 21168.621094
v 14023.842773 31521.998047 20383.818359
v 14380.259766 31241.277344 20809.609375
v 14537.049805 31033.482422 21163.929688
v 14458.199219 31611.935547 20697.984375
v 14753.140625 31611.935547 21017.324219
v 15072.802734 31190.488281 21380.162109
v 15235.820312 31573.119141 21303.736328
v 15643.363281 31743.869141 21423.210938
v 10685.016602 31916.876953 12051.876953
v 10934.186523 31916.876953 12051.876953
v 12364.790039 31958.748047 11989.375000
v 12825.875977 32015.781250 11906.248047
v 13415.759766 32052.683594 11843.750977
v 14005.642578 32080.962891 11872.030273
v 14595.525391 32137.804688 11926.552734
v 17187.498047 32047.041016 9603.859375
v 16065.277344 31984.539062 10877.151367
v 15203.230469 32215.394531 11763.370117
v 15319.365234 32595.255859 11900.886719
v 15814.091797 32165.792969 11207.112305
v 15529.884766 32170.978516 11517.594727
v 15909.250000 32636.912109 11335.489258
v 15764.599609 32812.710938 11725.088867
v 16013.203125 33122.640625 11942.546875
v 16613.492188 32014.494141 10235.399414
v 16380.513672 32196.142578 10644.170898
v 16540.791016 32562.708984 10804.448242
v 17000.751953 32227.394531 10028.360352
v 16814.007812 32407.750000 10411.192383
v 17207.263672 32518.664062 10214.577148
v 16988.404297 32651.541016 10599.558594
v 16147.535156 32377.794922 10942.233398
v 16364.996094 32796.437500 11205.390625
v 16189.201172 33030.167969 11549.291992
v 16903.609375 32992.332031 11131.901367
v 16582.457031 33090.093750 11468.546875
v 16377.566406 33148.453125 11754.325195
v 16903.609375 33190.777344 11367.854492
v 16938.681641 33401.835938 11681.880859
v 17204.683594 33701.015625 11891.769531
v 8984.218750 31914.294922 13817.757812
v 8933.633789 31949.255859 14126.464844
v 9576.874023 31911.523438 12647.112305
v 9503.129883 31985.277344 12946.699219
v 9876.459961 32027.392578 12528.580078
v 9889.695312 32299.173828 12934.932617
v 10095.146484 32534.134766 13123.715820
v 9285.640625 32064.884766 13587.311523
v 9286.577148 32203.693359 14126.464844
v 9708.350586 32393.765625 13536.582031
v 9628.134766 32456.257812 14126.464844
v 10003.291992 32588.832031 13536.582031
v 9923.076172 32655.357422 14126.464844
v 8902.382812 31977.679688 14716.348633
v 8942.549805 31952.195312 15160.777344
v 9286.577148 32247.734375 14716.348633
v 9235.638672 32133.810547 15336.935547
v 9617.270508 32471.875000 14716.348633
v 9648.521484 32451.496094 15306.231445
v 9912.211914 32679.021484 14716.348633
v 9943.462891 32647.769531 15306.231445
v 9323.219727 32114.449219 15896.114258
v 9409.079102 32033.341797 16485.998047
v 9695.398438 32409.390625 15896.114258
v 9875.524414 32343.931641 16523.716797
v 9990.339844 32602.828125 15896.114258
v 10071.528320 32553.781250 16352.232422
v 10467.555664 32186.525391 12349.506836
v 10250.093750 32456.173828 12730.460938
v 10643.349609 32527.591797 12600.104492
v 10454.570312 32599.156250 12934.932617
v 11100.979492 32148.830078 12235.965820
v 11056.226562 32536.312500 12574.277344
v 11056.226562 32705.619141 12946.699219
v 10466.343750 32783.441406 13536.582031
v 10466.343750 32914.554688 14126.464844
v 11056.226562 32925.265625 13536.582031
v 11015.528320 33053.218750 14143.502930
v 11185.023438 33099.425781 14351.488281
v 11685.382812 32254.306641 12391.436523
v 11908.192383 32485.925781 12662.594727
v 11514.936523 32518.664062 12600.104492
v 11685.382812 32657.849609 12894.211914
v 12195.293945 32155.591797 12304.329102
v 12235.993164 32473.810547 12691.523438
v 12235.993164 32666.068359 12986.464844
v 11646.109375 32948.929688 13536.582031
v 11671.333984 33059.644531 14143.502930
v 12235.993164 32902.050781 13536.582031
v 12235.993164 32984.355469 14126.465820
v 11491.522461 33099.425781 14351.488281
v 10466.343750 32961.878906 14716.348633
v 10466.343750 32915.003906 15306.231445
v 10805.812500 33074.566406 14716.349609
v 11014.570312 33059.644531 15352.656250
v 10248.508789 32466.681641 16745.490234
v 10466.343750 32807.558594 15896.114258
v 10453.619141 32613.564453 16523.716797
v 11056.226562 32937.480469 15896.114258
v 11056.226562 32718.869141 16485.998047
v 11100.753906 33121.441406 14716.349609
v 11183.427734 33120.261719 15186.976562
v 11884.777344 33078.589844 14477.675781
v 11646.109375 33074.566406 15537.619141
v 12208.960938 33022.144531 14691.122070
v 12208.960938 33008.214844 15326.941406
v 11868.108398 32445.853516 16730.017578
v 11646.109375 32952.214844 15896.114258
v 11661.333008 32654.285156 16514.435547
v 12235.993164 32326.644531 16626.439453
v 12235.993164 32832.417969 15896.114258
v 12235.993164 32598.220703 16331.497070
v 11671.333984 33122.152344 14691.122070
v 11646.109375 33121.441406 15242.676758
v 11994.313477 33099.425781 14870.931641
v 11994.313477 33099.425781 15144.120117
v 9512.788086 31954.775391 16849.669922
v 9876.459961 32067.710938 16973.029297
v 8236.795898 31958.746094 21406.468750
v 8696.694336 32000.306641 21328.449219
v 9286.577148 32011.169922 21317.583984
v 9876.459961 31979.919922 21380.085938
v 10413.885742 32213.412109 17089.353516
v 10579.262695 31960.138672 17403.250000
v 10641.765625 32529.175781 16817.123047
v 11056.226562 32266.087891 17133.283203
v 11056.226562 31971.144531 17403.837891
v 11056.226562 32545.384766 16838.341797
v 11640.235352 32192.578125 17070.009766
v 11412.362305 31939.306641 17382.416016
v 11474.852539 32529.175781 16821.292969
v 12235.993164 32031.703125 16897.222656
v 10311.959961 31937.912109 21448.136719
v 12825.875977 32287.769531 12356.815430
v 12825.875977 32473.810547 12691.523438
v 12825.875977 32621.281250 12986.464844
v 13415.759766 32324.673828 12356.815430
v 13415.759766 32473.810547 12689.444336
v 13415.759766 32555.060547 12984.385742
v 12825.875977 32794.761719 13536.582031
v 12825.875977 32833.167969 14126.464844
v 13661.291992 32456.173828 13742.917969
v 13610.161133 32414.449219 14126.464844
v 13445.102539 32594.042969 13542.408203
v 13315.219727 32612.810547 14126.464844
v 14036.014648 32388.214844 12387.190430
v 13859.635742 32476.996094 12691.168945
v 14252.891602 32497.830078 12604.067383
v 14036.014648 32506.541016 12911.357422
v 14595.525391 32432.746094 12188.554688
v 14595.525391 32549.111328 12483.496094
v 14595.525391 32617.085938 12946.699219
v 14005.642578 32387.214844 13648.766602
v 14026.351562 32131.671875 14109.666992
v 14005.642578 32508.183594 13353.825195
v 14595.525391 32273.074219 13663.582031
v 14660.007812 32032.296875 14065.236328
v 14595.525391 32564.736328 13368.640625
v 12825.875977 32802.960938 14716.348633
v 12825.875977 32740.605469 15306.231445
v 13532.842773 32314.890625 14716.348633
v 13498.056641 32156.808594 15308.960938
v 13237.901367 32582.603516 14716.348633
v 13171.384766 32537.658203 15306.231445
v 12976.250977 32414.708984 16046.489258
v 12769.206055 32171.152344 16455.330078
v 12798.124023 32595.951172 15868.362305
v 12582.996094 32527.988281 16232.604492
v 13286.456055 32211.578125 15868.362305
v 13144.112305 32507.160156 15653.234375
v 13824.967773 32019.949219 14716.348633
v 14290.587891 32506.763672 15591.176758
v 14678.268555 32236.333984 14669.341797
v 14381.025391 32201.820312 15198.286133
v 14776.300781 32669.662109 14834.632812
v 14606.951172 32784.839844 15332.045898
v 14033.000977 32201.820312 15896.114258
v 13782.916992 32241.095703 16471.654297
v 14189.614258 32738.716797 15936.598633
v 13946.983398 32791.699219 16485.998047
v 14437.601562 32900.019531 15766.960938
v 14830.857422 33146.253906 15466.172852
v 14248.918945 33142.277344 16160.216797
v 14177.100586 33247.328125 16485.998047
v 14618.748047 33242.261719 15936.599609
v 14582.722656 33537.617188 16521.009766
v 14770.814453 33841.496094 16740.976562
v 14926.111328 32476.996094 12081.843750
v 15147.806641 32685.240234 12309.809570
v 15185.408203 32862.187500 12946.699219
v 15658.496094 32975.753906 12356.816406
v 15582.457031 33038.410156 12946.700195
v 15138.136719 32230.076172 13773.903320
v 15075.931641 32204.521484 14028.123047
v 15185.408203 32700.460938 13464.556641
v 15303.693359 32617.470703 14286.405273
v 15583.644531 32441.687500 13804.340820
v 15583.644531 32441.687500 13893.149414
v 15747.730469 32876.808594 13615.393555
v 15778.281250 32758.933594 14104.452148
v 15953.437500 33138.847656 12356.816406
v 15877.398438 33168.316406 12946.700195
v 15911.818359 33161.925781 13426.448242
v 16082.054688 33074.824219 13819.703125
v 16139.658203 33028.886719 14126.465820
v 16365.175781 33211.738281 12356.816406
v 16365.175781 33290.019531 12946.700195
v 16986.855469 33488.574219 12362.642578
v 16974.355469 33527.621094 12942.666992
v 17204.683594 33701.011719 12169.898438
v 17183.849609 33719.058594 13136.606445
v 16313.279297 33298.699219 13588.478516
v 16434.599609 33275.605469 14126.465820
v 16793.330078 33590.191406 13536.583008
v 16746.453125 33570.546875 14126.465820
v 17088.271484 33778.425781 13536.583008
v 17041.394531 33827.390625 14126.465820
v 14910.437500 32455.970703 14441.375977
v 15117.476562 32840.191406 14665.973633
v 14931.259766 33062.917969 15072.916992
v 15775.292969 32980.808594 14552.830078
v 15324.513672 33165.695312 14890.570312
v 15150.896484 33277.503906 15284.219727
v 15775.292969 33202.394531 14847.771484
v 15775.292969 33453.996094 15306.232422
v 15171.136719 33552.500000 15877.199219
v 14964.994141 33624.019531 16347.721680
v 15358.250000 33701.011719 16061.215820
v 15150.605469 33967.878906 16527.919922
v 15775.292969 33633.187500 15730.669922
v 15775.292969 33823.519531 16025.611328
v 15775.292969 34118.460938 16316.439453
v 16150.976562 33021.449219 14520.729492
v 16354.632812 33295.484375 14716.955078
v 16382.541016 33359.582031 15365.220703
v 16730.828125 33586.175781 14716.349609
v 16733.564453 33549.277344 15306.232422
v 17025.769531 33822.628906 14716.349609
v 17028.505859 33822.628906 15306.232422
v 16382.541016 33448.175781 15694.458984
v 16357.203125 34015.386719 16038.458984
v 16155.261719 34241.292969 16234.429688
v 16731.740234 33533.167969 15650.774414
v 16947.060547 34023.234375 15912.641602
v 17162.378906 34262.125000 16195.341797
v 15336.214844 34354.582031 16708.117188
v 15775.292969 34437.804688 16611.380859
v 16548.517578 34282.960938 16174.507812
v 16357.203125 34463.457031 16453.033203
v 16769.123047 34282.960938 16174.507812
v 16980.453125 34557.066406 16479.865234
v 17191.781250 34872.843750 16764.392578
v 12562.162109 31927.591797 16791.453125
v 13663.911133 32234.716797 17055.416016
v 13621.124023 32254.427734 17614.826172
v 13681.057617 32630.576172 17777.498047
v 13577.298828 32201.818359 18255.648438
v 13652.212891 32201.818359 18787.701172
v 13667.037109 32653.576172 18255.648438
v 13682.125977 32572.035156 18709.197266
v 13724.936523 32470.669922 17055.416016
v 13721.333984 32486.128906 17384.240234
v 13795.482422 32732.716797 17055.416016
v 13750.125000 32813.003906 17614.826172
v 13730.340820 32201.818359 19082.642578
v 13752.005859 32948.519531 18255.648438
v 13784.270508 32777.878906 18881.708984
v 14086.204102 33417.761719 17038.080078
v 13910.583984 33381.582031 17665.765625
v 14218.963867 33780.378906 17209.505859
v 14164.220703 33863.558594 17665.765625
v 14377.559570 33638.503906 16816.251953
v 14592.500977 34007.566406 17021.470703
v 14408.487305 34158.503906 17665.765625
v 13906.567383 33381.582031 18255.648438
v 13978.655273 33381.582031 18845.531250
v 14160.204102 33910.437500 18255.648438
v 14191.455078 33879.183594 18845.531250
v 14341.879883 34205.378906 18255.648438
v 14369.027344 34174.128906 18845.531250
v 13854.454102 32201.818359 19435.414062
v 14108.332031 32201.818359 20025.298828
v 13922.996094 32791.699219 19435.414062
v 14172.684570 32766.929688 20042.859375
v 14348.792969 32947.042969 20251.193359
v 14279.160156 32201.818359 20341.675781
v 14286.300781 32553.787109 20334.529297
v 14519.576172 32201.818359 20636.617188
v 14814.517578 32201.818359 20971.248047
v 14602.072266 32750.412109 20594.189453
v 14855.351562 32553.779297 20925.472656
v 14146.135742 33406.808594 19460.636719
v 14222.731445 33226.996094 19857.939453
v 14242.054688 33780.378906 19280.824219
v 14325.377930 33620.250000 19674.080078
v 14446.125000 33406.808594 20042.859375
v 14448.501953 33974.792969 19460.636719
v 14746.315430 33928.718750 19995.048828
v 14758.855469 33381.582031 20443.066406
v 14863.404297 33703.589844 20343.654297
v 14807.443359 34344.261719 17226.689453
v 14703.428711 34424.113281 17665.765625
v 14636.822266 34486.617188 18255.648438
v 14663.968750 34476.941406 18845.531250
v 14761.826172 34383.199219 19435.414062
v 14849.111328 34302.605469 19778.253906
v 14942.960938 34234.753906 16833.433594
v 15185.408203 32201.818359 21161.716797
v 14967.574219 32947.035156 20853.849609
v 15172.685547 32766.923828 21046.525391
v 15814.111328 32163.000000 21403.927734
v 15775.292969 32791.699219 21281.824219
v 15080.853516 34096.843750 20171.507812
v 15172.685547 33419.308594 20752.902344
v 15360.830078 33247.832031 20987.986328
v 15240.652344 33928.718750 20436.480469
v 15536.625000 33641.089844 20877.576172
v 15750.068359 33419.308594 21064.505859
v 15750.068359 33996.691406 20755.097656
v 15929.878906 33816.878906 20981.746094
v 16150.976562 32333.746094 21479.171875
v 16275.517578 32791.699219 21417.773438
v 16421.966797 33324.792969 21314.054688
v 16126.507812 34210.136719 20874.683594
v 16339.951172 33996.691406 21056.384766
v 16955.058594 33456.417969 21368.160156
v 16955.058594 33971.468750 21211.904297
v 15157.916016 34470.480469 17048.388672
v 15182.089844 34732.980469 17632.800781
v 15376.503906 34918.480469 17807.451172
v 15742.328125 34743.933594 17080.419922
v 15523.722656 34833.753906 17414.195312
v 15916.978516 34904.191406 17280.072266
v 15742.328125 35013.585938 17632.800781
v 14998.388672 34781.558594 18255.648438
v 14998.388672 34771.882812 18845.531250
v 15293.330078 34965.203125 18255.648438
v 15293.330078 34970.109375 18845.531250
v 15775.292969 35210.863281 18255.648438
v 15775.292969 35215.769531 18845.531250
v 16365.175781 34795.246094 16879.185547
v 16365.175781 34975.015625 17174.126953
v 16414.234375 35278.464844 17714.822266
v 16798.527344 34831.175781 16806.058594
v 16979.115234 35036.203125 17031.964844
v 16955.058594 35363.707031 17540.353516
v 16252.410156 35396.894531 18255.648438
v 16183.958984 35396.894531 18845.531250
v 16643.568359 35462.726562 17944.158203
v 16955.058594 35509.089844 17835.294922
v 16547.351562 35503.285156 18255.648438
v 16478.900391 35535.574219 18845.531250
v 16955.058594 35642.394531 18255.648438
v 16955.058594 35715.750000 18845.531250
v 15182.089844 34705.003906 19473.140625
v 15240.652344 34401.085938 19995.048828
v 15376.503906 34925.023438 19301.662109
v 15515.791016 34841.687500 19694.916016
v 15737.566406 34712.035156 20050.521484
v 15737.566406 35042.511719 19473.140625
v 15909.044922 34945.859375 19870.710938
v 15474.109375 34272.652344 20326.480469
v 15775.292969 34391.980469 20445.810547
v 16123.927734 34820.855469 20263.966797
v 16277.705078 35332.457031 19435.414062
v 16387.617188 35142.488281 20004.835938
v 16955.058594 35348.082031 20164.541016
v 16321.845703 34603.394531 20661.781250
v 16519.761719 34385.929688 20981.746094
v 16517.181641 34945.859375 20448.880859
v 16955.058594 34794.347656 20855.019531
v 16955.058594 34499.406250 21048.808594
v 16955.058594 35053.144531 20560.078125
v 16572.646484 35497.480469 19435.414062
v 16651.308594 35454.988281 19745.707031
v 16955.058594 35649.378906 19435.414062
v 16955.058594 35513.105469 19869.599609
v 96.877197 22589.455078 21960.041016
v 70.620850 22777.123047 22403.414062
v 116.421143 23086.880859 22612.431641
v 394.415771 22606.236328 21803.933594
v 438.329346 22935.550781 22299.863281
v 438.329346 23096.406250 22594.804688
v 15.610962 22763.687500 22974.710938
v -0.014526 22763.687500 23564.595703
v 87.312134 23152.796875 22974.710938
v 82.347290 23352.964844 23615.203125
v 438.329346 23264.101562 22974.710938
v 438.329346 23521.267578 23528.437500
v 137.255249 23662.482422 23845.566406
v 438.329346 23669.042969 23823.380859
v 15.610962 22763.687500 24154.478516
v 46.862183 22763.687500 24744.361328
v 34.143799 23353.570312 24154.478516
v 34.143799 23353.570312 24744.361328
v 62.487671 22763.687500 25334.244141
v 62.487671 22763.687500 25924.126953
v 62.487671 23353.570312 25334.244141
v 62.487671 23353.570312 25924.126953
v 105.845093 23691.933594 24154.478516
v 90.219482 23800.574219 24744.361328
v 438.329346 23758.601562 24154.478516
v 438.329346 23974.687500 24744.361328
v 102.937744 23908.027344 25334.244141
v 98.714478 23996.781250 25870.798828
v 122.865723 24252.785156 26031.875000
v 385.000854 24186.076172 25374.230469
v 152.820801 24228.962891 25638.619141
v 546.076172 24247.828125 25597.513672
v 385.000854 24267.509766 25870.798828
v 800.051758 22577.189453 21939.769531
v 829.252930 22769.765625 22416.246094
v 758.389404 23080.746094 22633.820312
v 980.503418 22763.687500 22974.710938
v 1145.539307 22763.687500 23564.595703
v 834.414062 23169.933594 22974.710938
v 913.591309 23370.355469 23603.041016
v 751.824951 23661.917969 23825.296875
v 2482.386230 23014.693359 22515.978516
v 2430.313232 23473.019531 21975.599609
v 2396.450439 23307.263672 22345.541016
v 2931.626465 22792.382812 21792.388672
v 2651.147461 22796.314453 22345.541016
v 2664.425293 23307.263672 21785.361328
v 2522.770508 23079.763672 22122.722656
v 2482.386230 23014.693359 22744.541016
v 2426.924316 23357.265625 22954.585938
v 2470.193359 23510.277344 23564.595703
v 2663.647949 22796.314453 22954.585938
v 2753.829590 22763.687500 23564.595703
v 2543.604492 23163.099609 23137.796875
v 2563.946777 23215.335938 23564.595703
v 2378.384033 23943.453125 21887.205078
v 2220.670166 23943.453125 22384.828125
v 2382.335449 24533.337891 21891.156250
v 2177.744873 24533.337891 22384.828125
v 2595.197754 23943.453125 21592.263672
v 2595.197754 24533.337891 21596.214844
v 2242.173340 23943.453125 22974.710938
v 2307.564941 23943.453125 23564.595703
v 2066.349854 24533.337891 22974.710938
v 2069.248047 24533.337891 23564.595703
v 1248.010986 22750.576172 24175.712891
v 1263.140625 22552.183594 24744.361328
v 1147.218750 23345.607422 24175.712891
v 1246.529541 23556.271484 24744.361328
v 1344.406250 22938.460938 24386.496094
v 1398.922119 22847.126953 24744.361328
v 1344.406250 23143.669922 24386.496094
v 1398.922119 23261.330078 24744.361328
v 1255.332275 22520.933594 25334.244141
v 1224.072266 22533.894531 25924.126953
v 1311.753174 23637.111328 25100.101562
v 1458.437744 22815.875000 25334.244141
v 1496.619629 22828.835938 25924.126953
v 1449.536621 23405.716797 25311.736328
v 1573.256592 23353.570312 25924.126953
v 826.583252 23715.181641 24154.478516
v 951.587891 23822.625000 24744.361328
v 1037.645508 23938.605469 25348.808594
v 1104.864258 24035.730469 25924.126953
v 763.537842 24247.828125 25597.513672
v 809.922607 24263.994141 25924.126953
v 1353.413818 23678.779297 25493.355469
v 1399.791260 23740.789062 25924.126953
v 2461.332520 23510.277344 24154.478516
v 2455.449219 23525.902344 24744.361328
v 2777.272461 22763.687500 24154.478516
v 2828.104980 22763.687500 24744.361328
v 2579.572266 23215.335938 24154.478516
v 2595.197754 23230.960938 24744.361328
v 2460.280273 22933.923828 26103.390625
v 2479.935547 23587.341797 25334.244141
v 2413.660156 23406.417969 25913.708984
v 2803.609375 22763.687500 25334.244141
v 2637.804199 22747.853516 25913.708984
v 2579.572266 23292.400391 25334.244141
v 2543.604492 23245.019531 25710.132812
v 2306.516846 23943.453125 24154.478516
v 2297.735352 23943.453125 24744.361328
v 2139.562988 24533.337891 24154.478516
v 2167.916016 24533.337891 24744.361328
v 2353.472900 23943.453125 25334.244141
v 2296.862793 23943.453125 25924.126953
v 2218.744141 24533.337891 25334.244141
v 2281.246338 24533.337891 25924.126953
v 1879.518066 25224.416016 23167.080078
v 1879.518066 25224.416016 23463.281250
v 1885.314453 25707.019531 23171.566406
v 1885.314453 25707.019531 23502.007812
v 1897.960938 26302.986328 23218.412109
v 1897.960938 26302.986328 23535.603516
v 1905.620605 26605.345703 23262.236328
v 1905.620605 26605.345703 23430.625000
v 2435.581787 24989.683594 21980.867188
v 2284.018555 25161.074219 22353.996094
v 2266.097656 25713.103516 22443.685547
v 2642.520996 25161.074219 21788.523438
v 2529.215332 25382.939453 22136.810547
v 2723.559570 25713.103516 21794.945312
v 2537.528809 25713.103516 22148.744141
v 1972.219971 25065.960938 22972.156250
v 1933.955566 25065.960938 23621.783203
v 1959.532471 25707.019531 22935.611328
v 1916.637695 25707.019531 23737.958984
v 2284.630615 26302.986328 22447.781250
v 2376.457764 26892.869141 22510.283203
v 2743.127441 26302.986328 21794.945312
v 2541.471191 26302.986328 22152.839844
v 2821.336426 26892.869141 21794.945312
v 2572.722656 26892.869141 22215.341797
v 1989.688965 26302.986328 22923.468750
v 1921.399170 26302.986328 23830.544922
v 2086.344482 26838.332031 23029.250000
v 1986.340820 26838.332031 23602.189453
v 2023.424316 25123.220703 24154.478516
v 2089.788086 25123.220703 24744.361328
v 1961.012207 25713.103516 24154.478516
v 2041.066162 25713.103516 24744.361328
v 2187.492920 25123.220703 25334.244141
v 2359.365234 25123.220703 25924.126953
v 2284.277832 25720.224609 25393.232422
v 2460.484375 25678.748047 25846.439453
v 2549.059082 25809.039062 25955.064453
v 1964.873535 26302.986328 24154.478516
v 2066.520752 26302.986328 24744.361328
v 2031.237305 26892.869141 24154.478516
v 2144.729492 26892.869141 24744.361328
v 2342.726074 26342.128906 25392.980469
v 2482.506348 26171.597656 25670.435547
v 2364.945801 26892.869141 25302.363281
v 2503.340332 26564.851562 25628.765625
v 2590.401855 26342.128906 25889.888672
v 2519.257324 26892.869141 25597.304688
v 2698.689941 26892.869141 25924.126953
v 62.487671 22763.687500 26514.011719
v 62.487671 22763.687500 27103.894531
v 62.487671 23353.570312 26514.011719
v 62.487671 23353.570312 27103.894531
v 62.487671 22763.687500 27693.777344
v 62.487671 22763.687500 28283.660156
v 62.487671 23353.570312 27693.777344
v 62.487671 23353.570312 28283.660156
v 67.321167 23943.453125 26514.011719
v 62.487671 23943.453125 27103.894531
v 107.771240 24309.101562 26514.011719
v 102.937744 24416.537109 27103.894531
v 438.329346 24330.523438 26514.011719
v 438.329346 24526.212891 27103.894531
v 62.487671 23943.453125 27693.777344
v 62.487671 23943.453125 28283.660156
v 102.937744 24500.142578 27693.777344
v 98.008911 24589.166016 28292.589844
v 467.270264 24776.386719 27741.734375
v 459.691406 24820.376953 28241.943359
v 46.862183 22763.687500 28873.542969
v 31.236572 22763.687500 29463.427734
v 62.487671 23353.570312 28873.542969
v 62.487671 23353.570312 29463.427734
v 31.236572 22763.685547 30053.310547
v 31.236572 22763.685547 30643.193359
v 62.487671 23353.568359 30053.310547
v 62.487671 23353.568359 30643.193359
v 62.487671 23943.453125 28873.542969
v 62.487671 23943.453125 29463.427734
v 66.439087 24533.337891 28873.542969
v 62.487671 24533.337891 29463.427734
v 718.113525 24823.011719 28593.759766
v 62.487671 23943.451172 30053.310547
v 62.487671 23943.451172 30643.193359
v 62.487671 24533.335938 30053.310547
v 62.487671 24533.335938 30643.193359
v 116.421143 25382.939453 26712.402344
v 102.937744 25355.660156 27103.894531
v 102.937744 25713.103516 26645.693359
v 62.487671 25713.103516 27103.894531
v 255.803101 25382.939453 26712.402344
v 358.887451 25355.660156 27103.894531
v 345.197021 25713.103516 26645.693359
v 645.739014 25667.136719 27092.271484
v 107.771240 25371.285156 27693.777344
v 67.321167 25713.103516 27693.777344
v 98.714478 25670.474609 28273.062500
v 414.308960 25190.283203 27741.734375
v 653.829102 25454.888672 27693.777344
v 446.790283 25492.126953 28273.062500
v 116.421143 26129.185547 26687.822266
v 94.847778 26316.681641 27058.111328
v 116.421143 27084.708984 26768.458984
v 94.847778 26889.996094 27058.111328
v 300.051514 26129.185547 26687.822266
v 473.339355 26316.681641 26961.486328
v 240.238281 27084.708984 26768.458984
v 479.121826 26915.083984 27093.218750
v 62.487671 26302.986328 27693.777344
v 62.487671 26302.986328 28283.660156
v 62.487671 26892.869141 27693.777344
v 62.487671 26892.869141 28283.660156
v 718.005371 27138.712891 27426.982422
v 106.889160 24913.976562 28873.542969
v 102.937744 24998.800781 29463.427734
v 102.937744 25800.880859 28873.542969
v 102.937744 25845.660156 29463.427734
v 488.223145 24943.677734 28823.648438
v 438.329346 25164.876953 29463.427734
v 438.329346 25640.449219 28873.542969
v 438.329346 25698.900391 29463.427734
v 87.697388 25141.429688 30017.644531
v 37.924194 25123.218750 30643.193359
v 87.697388 25706.296875 30017.644531
v 37.924194 25713.101562 30643.193359
v 438.329346 25327.244141 29801.050781
v 438.329346 25548.621094 29801.050781
v 62.487671 26302.986328 28873.542969
v 62.487671 26302.986328 29463.427734
v 62.487671 26892.869141 28873.542969
v 62.487671 26892.869141 29463.427734
v 62.487671 26302.984375 30053.310547
v 62.487671 26302.984375 30643.193359
v 62.487671 26892.867188 30053.310547
v 62.487671 26892.867188 30643.193359
v 1246.676514 22520.818359 26285.021484
v 1578.538574 22735.943359 26494.593750
v 1854.059814 22710.943359 27125.593750
v 1682.632324 23353.570312 26514.011719
v 1810.549316 23362.744141 27141.496094
v 1858.780029 23565.488281 27557.251953
v 1089.238770 24085.271484 26514.011719
v 1157.699463 24132.148438 27103.894531
v 794.297119 24259.818359 26514.011719
v 862.758057 24348.072266 27103.894531
v 1462.290039 23790.330078 26514.011719
v 1515.125488 23837.207031 27103.894531
v 1289.742920 24197.039062 27453.068359
v 1011.506836 24514.146484 27670.537109
v 1028.212646 24604.023438 28283.660156
v 1610.072754 23931.464844 27701.789062
v 1740.733154 24054.498047 28283.660156
v 1361.366211 24259.541016 27846.324219
v 1445.791504 24316.984375 28283.660156
v 2454.657715 22933.193359 26514.011719
v 2312.569336 23353.570312 26514.011719
v 2625.557617 22638.251953 26514.011719
v 2801.549316 22777.789062 27089.789062
v 2594.501465 23254.369141 27244.751953
v 2000.370117 22696.613281 27693.777344
v 2228.744141 22706.539062 28234.595703
v 2075.296631 23353.570312 28283.660156
v 2987.757324 22932.750000 27503.869141
v 2559.392090 22499.000000 28480.474609
v 2815.887695 23419.755859 27648.423828
v 3000.195312 23508.996094 28250.199219
v 2203.118408 23943.453125 26514.011719
v 2334.141113 23943.453125 27103.894531
v 2281.246338 24533.337891 26514.011719
v 2393.430664 24589.753906 27155.544922
v 2507.205078 24823.994141 27386.605469
v 2195.831543 23936.917969 28398.832031
v 2468.220703 24430.738281 27454.365234
v 2415.262939 24533.337891 28554.912109
v 2667.690918 23943.453125 27736.089844
v 2870.637695 24019.812500 28366.876953
v 2602.060059 24589.753906 27668.107422
v 1065.605957 24748.228516 28823.648438
v 1287.162598 24813.121094 29308.636719
v 1841.714111 24172.449219 28769.554688
v 1634.290039 24399.779297 28929.126953
v 1646.328613 24670.996094 29502.292969
v 2374.531738 22825.433594 28873.542969
v 2403.685547 22888.673828 29463.427734
v 2266.823975 23353.570312 28873.542969
v 2401.935547 23308.445312 29463.539062
v 2646.097656 22530.492188 28873.542969
v 2819.532715 22595.593750 29458.058594
v 2932.983887 23414.435547 28873.542969
v 2701.140625 23884.603516 29514.400391
v 2334.495605 22960.113281 30053.310547
v 2345.908691 23009.326172 30522.544922
v 2334.495605 23108.167969 30053.310547
v 2385.161621 23091.804688 30626.443359
v 2797.862305 22784.675781 30053.310547
v 2801.686035 22968.214844 30688.781250
v 2668.735352 23403.109375 30053.310547
v 2786.875977 23313.501953 30734.113281
v 2219.792236 24032.710938 28871.414062
[truncated: 1,528,902 more chars]
